# Supplementary material for: GABPA Recruits the Integrator Endonuclease Complex to Promote Transcription Elongation
Source: Research Square preprint supplement (doi:10.21203/rs.3.rs-7297262/v1), 2025-09-19
Supplement: Supplementary file 1 [file 3df4a3da97a8698cfb9b4ffe.xlsx]

## Sheet: GABPA_12h_CoIP-MS
TableS2, Differentially enriched proteins in CoIP-MS with GABPA degradation for 12 hours (dTAG vs DMSO).
Protein_id	Protein_name	Gene_name	pvalue	log2FC	Intensity_DMSO_rep1	Intensity_DMSO_rep2	Intensity_DMSO_rep3	Intensity_dTAG_rep1	Intensity_dTAG_rep2	Intensity_dTAG_rep3
Q00422	GABPA	Gabpa	2.98743e-06	-7.4	1684.8	1248.9	4986.5	12.002	14.376	12.509
Q00420	GABPB1	Gabpb1	3.99486e-06	-8.24	1022.5	929.94	1069	2.4633	1.8451	8.0248
P81069	GABPB2	Gabpb2	2.47052e-07	-7.66	532.99	396.93	671.76	3.893	1.9874	2.1999
O08808	DIAP1	Diaph1	8.99024e-06	-3.95	7.8597	15.442	9.8295	0	0	0
Q3TYX3	SMYD5	Smyd5	2.52734e-05	-3.14	5.8772	5.5292	7.8239	0.95401	0.66021	0.59498
Q3V300	KIF22	Kif22	3.29996e-05	-2.86	7.896	10.065	10.602	1.7101	1.241	1.0329
Q9CYN2	SPCS2	Spcs2	6.47941e-05	-3.79	5.09	18.428	9.0517	0	0	0
Q9JHP7	PLGT2	Kdelc1	0.00010773	-2.17	2.1262	3.3351	3.218	0.76846	0	0.54559
O55091	IMPCT	Impact	0.000314695	-1.93	1.5001	3.3063	3.4854	0.83894	0	0
O35343	IMA3	Kpna4	0.000399494	-2.69	14.181	23.51	14.432	4.2793	2.3504	1.7802
P26883	FKBP1A	Fkbp1a	0.000436595	-3.88	139.39	78.934	488.55	14.194	9.9424	11.916
O35643	AP1B1	Ap1b1	0.00057226	-1.65	7.7654	9.7188	14.631	3.5793	3.214	3.0806
Q8R323	RFC3	Rfc3	0.0008654	-2.19	1.7895	5.5569	3.07	0	0	0
Q8CIM8	INTS4	Ints4	0.00101108	-1.6	1.5311	3.1503	2.3608	0	0	0.78967
P40124	CAP1	Cap1	0.00137694	-1.39	41.84	74.611	74.123	24.722	22.222	23.487
P13864	DNMT1	Dnmt1	0.001452	-1.44	16.898	21.348	30.79	7.9663	7.1493	9.7244
F8VQC1	F8VQC1	Srp72	0.00206463	-1.64	5.4177	15.563	12.039	3.5284	2.6441	3.583
Q9Z2Y8	PLPHP	Prosc	0.00230914	-1.23	8.0178	10.688	13.932	6.3916	3.5251	4.0796
Q9CZW4	ACSL3	Acsl3	0.00273071	-1.29	1.148	1.5267	2.6595	0	0	0
D3Z0M9	D3Z0M9	Ddx23	0.00278566	1.45	0	0	1.1576	3.4363	1.5679	1.8163
Q68FL6	SYMC	Mars	0.00282437	-1.12	61.44	97.295	117.37	46.575	32.474	44.837
Q3TXS7	PSMD1	Psmd1	0.00287636	-1.28	34.364	64.255	65.586	20.922	19.201	24.954
Q9CW46	RAVR1	Raver1	0.0029794	1.16	0	0	0	1.7837	1.4071	1.7315
Q80X98	Q80X98	Dhx38	0.00325821	-1.45	1.0539	2.8465	2.1792	0	0	0
Q6P542	ABCF1	Abcf1	0.0037477	-1.39	20.789	30.253	44.775	10.382	12.92	11.692
Q8BX09	RBBP5	Rbbp5	0.00381893	-1.81	1.5457	5.9358	4.3125	0.97015	0.83761	1.1351
Q6PAM1	TXLNA	Txlna	0.00426855	-1.67	6.2435	3.8425	6.5956	2.5196	1.1611	1.6761
P35564	CALX	Canx	0.00432584	-1.5	45.184	93.211	68.313	32.313	13.446	29.028
O08784	TCOF	Tcof1	0.00446948	-2.76	26.386	26.507	40.699	1.9343	5.3391	8.854
Q8BMG7	RBGPR	Rab3gap2	0.00505932	-1.09	1.2508	1.6034	1.5541	0.85366	0.6016	0
Q6P4T2	U520	Snrnp200	0.00506323	-1.13	35.318	58.124	59.963	31.375	20.459	18.234
Q8CIE6	COPA	Copa	0.00546776	-1.01	21.986	31.819	34.105	15.597	13.377	13.906
P30416	FKBP4	Fkbp4	0.0056067	-1	408.91	597.67	660.66	285.72	236.53	297.46
Q9Z1D1	EIF3G	Eif3g	0.00582441	-2.81	4.2992	12.408	9.5797	4.021	0	0
Q99L48	NMD3	Nmd3	0.00591768	-1.08	2.7135	3.6118	3.4554	2.0975	1.2576	1.3587
Q8CCI5	RYBP	Rybp	0.00632722	-1.8	8.781	5.5912	17.062	2.4033	3.0061	2.749
Q99MN1	SYK	Kars	0.00656765	-1.15	178.75	225.29	323.07	96.126	93.962	131.66
P24860	CCNB1	Ccnb1	0.00694261	-1.71	8.2359	18.978	12.79	5.9342	1.8241	5.2622
P33174	KIF4	Kif4	0.00699041	-1.33	2.3352	1.8016	2.6659	1.2973	0	0.92584
Q99PV0	PRP8	Prpf8	0.00706746	-0.965	30.266	45.521	46.149	26.016	14.944	21.965
Q99JX7	NXF1	Nxf1	0.00736316	-1.98	4.7106	23.315	16.691	3.4574	3.6715	2.3618
Q9D662	SC23B	Sec23b	0.00738202	-1.89	2.4846	5.236	3.0169	2.0678	0	0
Q8CG47	SMC4	Smc4	0.0074265	-1.62	32.788	62.837	30.869	11.59	10.885	17.402
Q99MD9	NASP	Nasp	0.00744777	-0.957	222.07	394.79	479.73	228.11	146	172.45
Q3THK7	GUAA	Gmps	0.00764314	-1.11	25.159	28.148	56.536	19.182	12.366	16.735
P35601	RFC1	Rfc1	0.00761374	-1.45	4.3677	7.0881	5.1477	2.5434	2.3016	1.3321
P83882	RL36A	Rpl36a	0.00769507	-1.61	55.043	72.239	119.7	26.933	13.651	45.303
Q920B9	SPT16	Supt16h	0.00770139	-1.06	83.467	152.86	167.5	59.018	56.65	70.754
Q61687	ATRX	Atrx	0.0081858	-1.63	1.4785	4.2554	1.8504	0	0.75503	0.59687
Q99J09	MEP50	Wdr77	0.00826547	-1.84	2.0539	7.5029	8.6021	2.2565	1.4075	0.91882
P43276	H15	Hist1h1b	0.00858156	-1.23	29.03	38.132	35.331	13.406	16.862	13.386
Q9CYZ2	TPD54	Tpd52l2	0.00872061	-1.18	5.136	9.1444	7.1396	3.4287	2.0488	4.1097
Q9DBY8	NVL	Nvl	0.0088098	1.4	0.68214	0.88305	2.0295	2.4435	2.8734	3.1787
Q91YK2	RRP1B	Rrp1b	0.00954476	-1.77	6.6113	3.7517	4.7063	2.5395	1.173	0.99307
P97855	G3BP1	G3bp1	0.0100593	-0.999	168.79	170	279.58	104.82	88.649	108.16
Q8VDJ3	VIGLN	Hdlbp	0.0103825	-0.923	24.814	37.944	47.586	18.974	15.659	22.117
B2RY56	RBM25	Rbm25	0.0105204	-1.07	9.1505	21.078	15.049	7.5712	5.9302	6.9856
P05064	ALDOA	Aldoa	0.0106385	-0.904	1203.7	2180.3	2661.2	1283	773.66	1074.2
Q8CI94	PYGB	Pygb	0.0105718	-0.97	15.211	18.72	18.406	12	6.4157	9.0534
Q61655	DD19A	Ddx19a	0.0107201	-1.03	31.762	71.668	60.929	33.353	17.994	27.052
Q9R0Q4	MO4L2	Morf4l2	0.0106561	-1.39	8.2081	14.829	12.487	3.991	6.0699	3.451
O09012	PEX5	Pex5	0.0107852	-1.15	1.6145	1.5267	1.6869	1.084	0	0.59602
Q9EP97	SENP3	Senp3	0.0109665	-0.963	3.0812	5.8628	5.0393	2.3833	2.0294	2.5408
P47802	MTX1	Mtx1	0.0110271	-1.79	2.7846	5.5482	5.7902	2.7163	1.2829	0
Q61510	TRI25	Trim25	0.0111998	-0.908	16.198	30.278	27.616	15.33	9.6346	13.888
Q8K298	ANLN	Anln	0.0112968	-1.82	8.3459	17.576	12.649	1.9758	4.7578	4.4622
P63017	HSP7C	Hspa8	0.011223	-0.857	5275.4	7886.8	9364.2	5103.3	2928.4	4384.9
P49722	PSA2	Psma2	0.0113875	-0.922	36.5	53.744	82.762	36.186	20.991	31.399
Q61335	BAP31	Bcap31	0.0118376	-1.3	26.994	44.339	43.386	13.568	10.217	25.288
Q01320	TOP2A	Top2a	0.0122918	-0.826	146.23	225.76	279.67	154.47	94.307	113.66
Q8C570	RAE1L	Rae1	0.0124096	-2.57	5.9296	8.9224	9.5915	0	0	4.7511
Q9R1T2	SAE1	Sae1	0.0125222	-1.03	50.809	96.718	76.912	33.32	32.283	40.987
Q9Z0X1	AIFM1	Aifm1	0.0127449	-1.1	10.257	19.87	17.538	11.869	5.4084	5.5968
Q8BJW6	EIF2A	Eif2a	0.0128859	-0.919	49.017	103.53	115.84	54.448	37.801	42.245
Q6ZQ58	LARP1	Larp1	0.0128278	-2.35	7.2843	16.44	7.6397	0	3.2483	2.4535
Q8VBT9	ASPC1	Aspscr1	0.0133402	-1.04	6.0127	6.8728	8.3277	5.5886	2.5681	2.7534
P13439	UMPS	Umps	0.0135954	-0.964	22.141	20.755	33.428	17.246	9.2396	12.989
Q922U1	PRPF3	Prpf3	0.0137137	-0.934	20.577	22.221	40.811	17.281	12.012	12.883
O35609	SCAM3	Scamp3	0.0136922	-1.49	15.56	25.527	17.76	4.5944	7.5308	9.2627
P63005	LIS1	Pafah1b1	0.013968	-2.02	6.0657	8.1248	9.6285	0	2.8357	2.8863
P54103	DNJC2	Dnajc2	0.014128	-1.31	2.4698	6.0682	7.8852	1.6011	1.9219	2.5433
Q68FD5	CLH1	Cltc	0.0142051	-0.934	169.84	218.91	348.98	150.55	121.27	101.98
P57776	EF1D	Eef1d	0.0142809	-0.897	280.57	471.6	559.83	250.29	162.13	282.8
P26043	RADI	Rdx	0.0144151	-0.955	34.277	32.778	52.26	22.042	15.255	23.989
Q78JE5	FBX22	Fbxo22	0.0146176	-1.72	3.8345	6.4676	4.0694	2.9559	0	1.6195
Q6P9P6	KIF11	Kif11	0.0145225	-1.12	10.149	13.922	19.634	11.589	4.8632	4.802
Q64521	GPDM	Gpd2	0.0147456	-1.18	26.488	37.521	33.545	19.653	7.695	19.122
O35326	SRSF5	Srsf5	0.0147419	-1.41	9.6431	15.278	18.488	7.4467	2.347	8.2232
Q61035	HARS1	Hars	0.0148638	-0.835	21.205	41.578	41.84	21.758	15.586	19.147
Q6NZC7	S23IP	Sec23ip	0.0148998	-1.44	1.7575	1.4575	4.2275	0	0.99011	0.62612
Q80ZX0	Q80ZX0	Sec24b	0.0149321	-1.43	1.5841	4.0245	2.3124	0	0	1.4752
Q61937	NPM1	Npm1	0.0150656	-1.47	1126.6	1184	1155.5	314.07	310.85	741.33
E9Q7G0	NUMA1	Numa1	0.0150847	-1.34	20.589	43.412	25.104	19.423	6.4553	10.994
Q6A026	PDS5A	Pds5a	0.0150787	-1.55	7.957	17.2	8.4154	4.0025	1.9607	5.797
Q5EG47	PRKAA1	Prkaa1	0.0150896	-1.14	1.9624	3.6635	3.9875	2.5558	0.94722	1.1045
Q61191	HCFC1	Hcfc1	0.0152093	-0.858	48.954	80.142	74.43	41.694	35.252	33.368
Q5DTM8	BRE1A	Rnf20	0.0153492	-0.985	0.878	2.0272	1.5821	0	0.67084	0
P35922	FMR1	Fmr1	0.0155648	-1.8	4.5626	6.6285	4.0557	1.7822	0	2.731
P09055	ITB1	Itgb1	0.0155559	-0.805	38.751	71.255	79.839	42.318	28.492	34.297
Q9R1C7	PR40A	Prpf40a	0.0155792	-1.59	3.285	1.7987	4.3051	1.2865	1.1642	0
Q9D8B3	CHM4B	Chmp4b	0.0156381	0.933	3.4312	3.778	4.5004	7.9109	7.7168	6.651
Q61543	GSLG1	Glg1	0.0157765	-2.82	4.0775	13.676	14.85	0	4.326	0
Q9Z1R2	BAG6	Bag6	0.0158851	-0.933	19.266	31.309	25.412	16.165	12.457	10.935
Q61316	HSP74	Hspa4	0.015897	-1.09	463.06	782.09	1152.9	296.23	379.7	386.23
P17809	GTR1	Slc2a1	0.0158223	-0.811	31.881	37.633	42.345	24.826	18.007	21.04
Q9CXW3	CYBP	Cacybp	0.0161085	-1.12	105	119.67	192.42	56.768	44.526	93.628
P26231	CTNA1	Ctnna1	0.0160245	-0.851	145.12	222.41	237.18	109.22	107.63	110.89
O35382	EXOC4	Exoc4	0.0167841	-1.8	3.1754	4.5345	1.4474	0	0	0.96338
Q3UKJ7	SMU1	Smu1	0.0169396	-1.79	11.725	20.298	19.147	2.6428	3.9879	10.386
Q8K4R9	DLGP5	Dlgap5	0.0173577	-1.49	1.5973	6.3225	2.5576	1.0635	0.91758	1.195
P97461	RS5	Rps5	0.01724	-1.55	214.81	477.12	443.03	76.249	109.69	217.8
Q99K48	NONO	Nono	0.0175562	-0.79	62.487	113.76	113.76	60.081	47.104	55.304
A2APB8	TPX2	Tpx2	0.01753	-1.12	8.16	7.2153	8.8449	3.3002	3.1026	5.0022
Q03173	ENAH	Enah	0.0177574	-1.87	12.809	18.925	16.668	2.9476	2.4947	11.174
P97379	G3BP2	G3bp2	0.0176732	-1.71	93.42	122.42	112.08	17.307	40.042	52.717
Q9CQW9	IFM3	Ifitm3	0.017866	-0.986	29.923	31.227	27.706	17.493	11.615	16.395
Q9CWN7	CNO11	Cnot11	0.0180405	-1.5	2.9668	4.7456	3.2845	1.5149	0	2.2589
Q3UMY5	EMAL4	Eml4	0.0180519	-0.846	14.558	21.416	26.021	13.6	11.243	9.1402
Q8K4Z5	SF3A1	Sf3a1	0.0179457	-0.795	27.246	34.446	55.108	25.752	17.99	21.363
A2AGT5	CKAP5	Ckap5	0.0182866	-1.44	5.3264	20.274	15.033	3.4885	4.0345	5.8305
Q62351	TFR1	Tfrc	0.0182881	-1.08	37.521	46.428	67.895	41.774	13.845	21.636
Q9CQC6	5MP2	Bzw1	0.0184896	-1.03	28.361	61.844	76.586	22.899	21.382	32.057
Q8BRT1	CLAP2	Clasp2	0.0185752	-1.7	3.3557	4.2992	5.9542	1.8047	2.2379	0
Q9ER72	SYCC	Cars	0.0189054	-0.867	46.42	56.994	89.561	35.277	26.103	42.381
P80314	TCPB	Cct2	0.0189068	-0.846	365.96	604.74	581.28	392.92	188.7	298.81
Q8JZQ9	EIF3B	Eif3b	0.0187711	-0.796	90.157	107.85	153.46	69.36	60.686	67.663
Q9Z1Z2	STRAP	Strap	0.0188854	-0.926	29.956	35.758	68.115	28.869	19.833	18.595
O08915	AIP	Aip	0.0192027	2.6	0	0	7.5792	10.961	6.2739	10.248
G5E829	AT2B1	Atp2b1	0.0191846	-1.71	2.0424	6.0237	1.6502	1.2796	0	0.75687
Q8C0C7	SYFA	Farsa	0.0192676	-0.788	22.571	34.955	32.892	18.85	13.806	19.358
Q8BMS1	ECHA	Hadha	0.0191124	-0.732	14.326	20.61	23.104	14.247	9.5451	10.948
Q64433	CH10	Hspe1	0.0193541	-0.931	60.643	70.916	59.346	40.749	28.816	31.343
Q9CW03	SMC3	Smc3	0.0190763	-1.28	13.473	37.718	25.604	10.878	12.006	6.8959
O55201	SPT5	Supt5h	0.0195424	-1.15	8.0996	9.3854	16.351	7.4306	2.5339	6.0864
P61082	UBC12	Ube2m	0.0195775	-1.96	10.309	12.696	14.957	1.6825	6.9012	2.8343
Q8CH18	CCAR1	Ccar1	0.0198151	-2.44	10.939	23.778	12.297	1.0115	2.7978	7.1152
Q811D0	DLG1	Dlg1	0.0200379	-0.898	1.0815	1.6986	1.4906	1.1441	0	0
Q91WK2	EIF3H	Eif3h	0.0198287	-1.23	42.647	51.557	34.6	22.49	10.746	24.209
Q6PDQ2	CHD4	Chd4	0.0200609	-1.3	14.34	14.095	9.4919	7.7083	4.2222	3.917
Q9CQS8	SC61B	Sec61b	0.0206683	-0.936	31.859	53.914	43.437	20.747	18.311	28.022
Q8BGQ7	SYAC	Aars	0.0209497	-0.835	320.09	666.89	594.45	327.14	264.23	258.74
P54276	MSH6	Msh6	0.0209295	-0.787	191.65	286.11	326.64	157.77	151.92	145.38
Q3TZX8	NOL9	Nol9	0.0208147	-0.738	8.3704	11.263	12.086	7.0293	5.3595	6.5245
Q9CQV8	1433B	Ywhab	0.0210894	-1.06	51.921	61.38	85.533	24.227	28.699	43.052
P80315	TCPD	Cct4	0.0214885	-0.827	408.09	714.11	620.39	381.51	225.85	376.18
Q6PGL7	WASC2	Fam21	0.0211833	-1.07	1.2705	2.5973	1.6761	1.3711	0	0.7415
Q8CGY8	OGT1	Ogt	0.0215006	-1.27	17.549	34.998	23.763	7.5876	8.5263	15.973
P16546	SPTN1	Sptan1	0.0213956	-1.04	80.098	106.88	71.673	44.955	40.76	38.417
Q8C7R4	UBA6	Uba6	0.0211575	-1.48	1.9689	2.3842	6.2897	0.77982	1.4681	1.1881
Q60865	CAPR1	Caprin1	0.0217704	-0.851	97.254	129.6	120.2	62.362	57.911	71.519
Q8JZY2	COMDA	Commd10	0.0215301	1.36	1.1055	0	0	3.4725	1.2251	2.8096
B1AUN2	B1AUN2	Eif2b3	0.0223208	-1.3	7.9621	4.6069	14.836	4.356	2.64	3.1933
Q9D7S7	RL22L	Rpl22l1	0.0223171	-1.8	13.145	18.062	10.054	8.9999	1.4989	4.2297
Q9Z1Z0	USO1	Uso1	0.0220343	-0.99	8.657	17.178	19.921	9.7035	7.5898	5.1369
P23198	CBX3	Cbx3	0.0226909	-0.776	34.169	36.144	55.34	26.755	21.176	24.007
O35864	CSN5	Cops5	0.0223424	-0.78	2.8988	3.4525	4.7079	2.3713	2.0629	1.9014
Q8BHC4	DCAKD	Dcakd	0.0227439	-1.65	4.5325	3.2515	4.3445	0	0.87213	2.7074
Q9CRC8	LRC40	Lrrc40	0.0227228	-1.74	10.243	5.4824	13.938	4.2884	1.1093	4.425
P53026	RL10A	Rpl10a	0.0225515	-0.729	182.89	328.44	329.7	193.02	137.27	164.21
Q9D0R2	SYTC	Tars	0.0223698	-0.752	54.679	62.616	93.3	48.304	31.586	43.828
Q60598	SRC8	Cttn	0.0228621	-1.78	6.2506	2.7337	3.8001	2.5017	0	1.0721
Q0VGB7	PP4R2	Ppp4r2	0.0230503	-2.16	5.2057	3.2055	12.254	1.305	2.7927	0
Q61466	SMRD1	Smarcd1	0.0231017	-0.929	6.3552	14.522	10.457	5.1702	4.7817	5.6523
Q8CG48	SMC2	Smc2	0.0230697	-0.945	27.491	55.309	64.773	34.796	22.464	17.644
Q99LD4	CSN1	Gps1	0.0234722	-1.74	3.5729	21.674	14.677	3.4241	1.8197	4.8994
Q60848	HELLS	Hells	0.0235608	-1.27	16.277	30.805	23.734	17.719	4.5191	10.686
Q9CQT1	MTNA	Mri1	0.0235447	-0.744	23.809	36.915	41.415	20.475	16.431	23.023
P23116	EIF3A	Eif3a	0.0240859	-0.722	128.62	150.74	184.77	115.32	77.785	89.072
Q9JLV6	PNKP	Pnkp	0.0240805	-1.05	1.2541	1.3906	2.245	0	0.4382	1.1496
Q9QZD9	EIF3I	Eif3i	0.0248567	-0.701	53.456	70.6	76.495	47.744	34.583	40.708
A6H5Z3	EXC6B	Exoc6b	0.0249508	-1.57	2.358	0.91453	3.7516	0	0.57306	0
Q9D600	PSF2	Gins2	0.0248916	-1.19	0.86789	2.6584	2.6306	1.3926	0	0
Q791V5	MTCH2	Mtch2	0.0248894	2	0	0.5843	2.4668	10.917	1.9806	2.6069
Q8R4R6	NUP35	Nup35	0.0256678	-0.907	7.4089	17.457	22.263	9.0665	5.6322	8.5546
Q91YR7	PRP6	Prpf6	0.0256967	-2.19	19.617	31.597	20.774	1.8317	6.6779	11.005
Q64324	STXB2	Stxbp2	0.0254101	-1.32	3.006	9.1502	6.3311	2.7832	2.8662	1.3988
Q99PP7	TRI33	Trim33	0.0254188	-1.08	3.5229	5.0205	3.6649	1.6515	2.2566	1.8272
Q02248	CTNB1	Ctnnb1	0.0262549	-0.737	52.077	72.769	106.76	49.928	42.174	41.54
P18653	KS6A1	Rps6ka1	0.0263553	-1.33	4.1775	4.8004	7.6223	1.5094	3.3367	1.9246
P57780	ACTN4	Actn4	0.0270086	-0.677	247.28	346.83	462.86	245.15	175.65	225.59
Q9WVP1	AP1M2	Ap1m2	0.0266733	-1.2	2.0209	1.7466	4.4221	0	1.2478	1.1761
P56546	CTBP2	Ctbp2	0.0265056	-0.914	40.327	92.735	66.525	33.415	33.113	33.579
Q8R1B4	EIF3C	Eif3c	0.0276688	-0.878	86.986	123.24	181.51	68.182	78.384	58.711
Q8BTW3	EXOS6	Exosc6	0.0270386	-0.75	3.9881	5.0802	8.7081	3.9088	2.8509	3.3311
Q9ESZ8	GTF2I	Gtf2i	0.0274691	-1.06	12.804	31.233	15.635	11.249	6.4716	9.4457
Q8CCF0	PRP31	Prpf31	0.0270468	-0.964	2.9801	4.372	5.2497	2.1337	1.3271	3.2529
P97770	THUM3	Thumpd3	0.0274159	-0.797	5.8592	8.0492	7.2765	4.0772	3.9038	4.1082
Q3V0J1	TM237	Tmem237	0.0272506	-0.699	0.76319	1.2982	1.386	0	0	0
P21126	UBL4A	Ubl4a	0.027529	-0.814	7.5397	8.4979	9.1099	6.9016	3.3086	4.7042
Q5SSL4	ABR	Abr	0.0280812	-0.837	0.97893	1.2477	2.0365	0	0.80551	0
Q9JIK5	DDX21	Ddx21	0.0276972	-0.956	150.22	114.73	221.23	85.1	80.619	76.171
Q99PL5	RRBP1	Rrbp1	0.0283679	-0.901	61.568	72.596	71.457	32.15	36.813	41.43
Q9ERD7	TBB3	Tubb3	0.0278404	-1.17	6.8451	9.7977	5.886	2.6592	3.023	4.2972
Q5XJY5	COPD	Arcn1	0.0289743	-0.779	22.724	47.43	39.189	22.401	16.254	22.948
Q9QYJ0	DNJA2	Dnaja2	0.0287916	-1.14	24.527	50.542	35.673	13.693	11.388	26.451
Q8CGC7	SYEP	Eprs	0.0286854	-0.779	136.41	263.32	219.76	119.19	104.87	125.04
Q7TPV4	MBB1A	Mybbp1a	0.028767	-0.755	163.04	257.04	226.35	169.65	106.77	109.05
Q6P5D8	SMHD1	Smchd1	0.0288138	-0.716	7.2452	11.178	11.809	8.3205	4.9989	5.186
Q6NZJ6	IF4G1	Eif4g1	0.0296943	-0.824	108.63	148.6	142.64	70.9	79.066	74.064
P27612	PLAP	Plaa	0.0293012	-0.668	16.672	26.493	27.494	16.9	12.684	14.126
Q9CZY3	UB2V1	Ube2v1	0.0292447	-1.11	7.9549	20.096	10.398	5.5085	6.008	5.0383
Q9QXK7	CPSF3	Cpsf3	0.0299553	-1.1	6.5759	6.4409	15.345	4.5807	4.8304	3.0054
P06745	G6PI	Gpi	0.0299558	-0.926	182.51	198	221.07	135.49	61.647	139.56
Q8BGT5	ALAT2	Gpt2	0.0304795	-0.853	3.328	3.5898	6.8602	2.3085	2.3152	2.6037
Q8BWW4	LARP4	Larp4	0.0304012	-0.942	16.046	34.238	19.187	13.88	9.8886	10.84
Q9QUM9	PSA6	Psma6	0.030187	-0.715	37.194	68.986	82.528	46.942	27.031	37.694
Q9CZM2	RL15	Rpl15	0.0299847	-0.957	61.059	60.781	92.133	43.078	21.188	51.177
Q9CZX8	RS19	Rps19	0.0305141	-0.796	315.53	582.62	443.65	261.82	206	288.7
Q9WUM4	COR1C	Coro1c	0.0313816	-1.06	17.759	30.055	33.476	25.607	7.4324	10.337
P97821	CATC	Ctsc	0.0308584	-1.04	1.5573	3.2184	2.602	1.7717	0	1.4199
P63038	CH60	Hspd1	0.030787	-0.675	1784.5	2124.6	2725.1	1763.5	1070.6	1344
Q6PB44	PTN23	Ptpn23	0.0314957	-0.678	0.90049	1.4897	1.5832	1.0673	0	0.82008
Q922R5	P4R3B	Smek2	0.0314482	-1.04	3.3376	7.5799	4.8008	2.3242	2.8862	2.0804
Q8BL97	SRSF7	Srsf7	0.0310778	1.44	6.9956	4.8684	3.1958	11.353	12.718	15.083
P63037	DNJA1	Dnaja1	0.0318329	-1.03	22.534	29.714	51.435	13.034	20.355	15.114
Q07104	GDF3	Gdf3	0.0321986	-1.03	0	1.7465	2.2048	0	0	0.53567
P17710	HXK1	Hk1	0.0323939	-1.56	1.2123	3.1359	5.7769	0	1.5896	0
O08528	HXK2	Hk2	0.0316276	-0.697	145.89	281.25	324.63	174.95	124.03	143.94
P07901	HS90A	Hsp90aa1	0.032308	-0.937	1603.8	1844.6	2614	820.14	951.88	1410.8
Q99KE1	MAOM	Me2	0.0322814	-1.51	7.0455	12.564	13.649	9.791	1.4599	3.6214
Q9CX30	YIF1B	Yif1b	0.0317979	-0.679	1.8907	2.969	3.6714	2.0617	1.5901	1.5322
Q9CWK3	CD2B2	Cd2bp2	0.0329682	-1.43	4.2176	5.0939	3.731	1.5001	2.7275	0.99836
Q8BW10	NOB1	Nob1	0.0327153	-1.26	7.8222	25.553	18.483	6.8047	8.8605	4.4417
Q9Z108	STAU1	Stau1	0.0328919	-1.15	6.3464	8.5053	7.0144	2.4257	2.612	5.4433
Q5SWD9	TSR1	Tsr1	0.0330059	-0.69	6.9841	9.6948	11.553	7.4526	3.9256	6.3668
Q9CRA8	EXOS5	Exosc5	0.034137	-0.807	0.91157	1.9039	1.2905	0	0	0.81225
Q91YE6	IPO9	Ipo9	0.0335026	2.18	4.266	0	1.7356	13.503	6.7612	5.1735
Q9QXS1	PLEC	Plec	0.0340605	1.68	1.8308	0	0	5.4022	3.7095	1.9423
P27659	RL3	Rpl3	0.0340863	-0.673	257.1	344.52	367.07	272.15	153.2	192.57
Q6P5B0	RRP12	Rrp12	0.0340129	-1.14	0	1.9323	2.8994	0	0.58398	0
Q99P72	RTN4	Rtn4	0.0333844	-1.54	36.201	152.01	134.13	72.465	18.613	22.431
Q99J36	THUM1	Thumpd1	0.0341847	-0.689	8.5766	10.029	16.21	8.4044	5.3736	7.3715
P16460	ASSY	Ass1	0.0351857	-0.777	224.96	352.8	280.59	183.76	120.18	200.58
Q9WTX6	CUL1	Cul1	0.0354316	-0.812	15.417	31.029	26.413	16.667	8.4818	16.514
Q9Z0G0	GIPC1	Gipc1	0.0343869	-0.853	1.4797	1.9094	1.9205	1.1694	0	1.327
Q9D0F3	LMAN1	Lman1	0.0352458	-0.949	21.912	47.725	27.074	22.427	10.724	16.378
Q3UM18	LSG1	Lsg1	0.0346363	-1.08	0	1.9048	2.6053	0	0	0
Q8K2Z4	CND1	Ncapd2	0.0353629	-0.967	22.393	38.672	24.024	15.306	15.7	11.593
P08003	PDIA4	Pdia4	0.0347116	-0.697	190.43	225.86	272.48	145.03	133.23	142.41
Q06180	PTN2	Ptpn2	0.0352721	-1	1.8953	4.4265	5.3216	2.9482	1.5407	1.2174
P14148	RL7	Rpl7	0.0344373	-0.656	334.59	549.36	531.74	374.45	229.5	290.72
Q78PY7	SND1	Snd1	0.0349919	-0.742	119.38	188.03	218.99	94.01	100.53	111.18
E9Q0S6	TENS1	Tns1	0.0350385	-1.14	0	1.9301	2.9223	0	0	0
Q80X41	VRK1	Vrk1	0.0353072	-1.83	2.1377	6.068	5.0388	3.9684	0	0
Q00612	G6PD1	G6pdx	0.0365916	-1.08	11.776	23.965	20.203	13.731	3.9956	10.897
P33215	NEDD1	Nedd1	0.0358417	-1.02	1.1953	2.445	1.1584	0	0	0.7941
Q922V4	PLRG1	Plrg1	0.0355496	-0.967	6.119	6.6545	12.876	4.1806	2.6839	6.2498
Q9JHK4	PGTA	Rabggta	0.036594	-1.2	3.7711	6.7028	3.8179	2.5431	1.0098	3.1031
P46061	RAGP1	Rangap1	0.036464	-0.809	34.253	59.454	44.479	37.517	17.364	25.881
Q08122	TLE3	Tle3	0.0362193	-0.695	5.3773	7.141	8.5294	5.0689	2.9414	5.1827
Q6P5G6	UBXN7	Ubxn7	0.0357626	-0.759	6.1163	13.359	10.674	7.5813	4.5823	5.1788
Q9Z1K6	ARI2	Arih2	0.0369323	-1.44	2.6072	5.0304	4.5078	2.4237	1.9769	0
O54984	GET3	Asna1	0.0374223	1.17	23.862	13.143	32.45	75.825	42.871	35.671
P58252	EF2	Eef2	0.0372843	-0.666	1711.8	2408.9	3320.2	1687	1458.6	1392.8
Q60760	GRB10	Grb10	0.0370209	-1.17	1.0739	2.8791	2.5268	0	1.2764	0
Q9CR16	PPID	Ppid	0.0372021	-1.43	18.053	80.123	75.737	17.995	10.131	30.47
P54822	PUR8	Adsl	0.0387013	-0.778	25.857	57.945	42.172	26.29	21.741	21.934
Q61024	ASNS	Asns	0.0386719	-0.64	397.81	659.08	786.11	426.45	297.33	429.63
P80313	TCPH	Cct7	0.038485	-0.71	295.12	571.86	454.03	338.13	203.57	254.3
Q9CQJ6	DENR	Denr	0.0389798	-0.652	4.5678	6.277	8.1917	5.469	3.1897	3.4677
Q7TT37	ELP1	Ikbkap	0.0387209	-1.03	16.019	34.928	20.344	13.884	12.415	7.7495
Q9JHI5	IVD	Ivd	0.0390666	-0.99	4.4876	7.945	6.8166	6.0968	1.7982	2.8271
E9Q5C9	NOLC1	Nolc1	0.0380751	-1.06	38.77	59.035	66.655	42.288	11.751	33.881
P61255	RL26	Rpl26	0.0384915	-1.22	61.06	48.7	137.11	27.982	21.362	53.463
Q9Z0U1	ZO2	Tjp2	0.0391307	-0.674	36.227	65.709	56.373	38.22	28.498	30.348
O35280	CHK1	Chek1	0.03945	-1.5	2.2498	5.1337	2.2777	0	0	2.2483
Q8BTM8	FLNA	Flna	0.0404431	-0.824	419.58	576.55	437.87	403.91	198.34	238.5
Q8VEK3	HNRPU	Hnrnpu	0.0396165	-0.669	380.87	691.54	904.11	453.03	308.35	424.17
Q8BK58	HBAP1	Hspbap1	0.0401468	-0.651	26.289	47.371	56.062	34.329	21.879	23.988
Q05CL8	LARP7	Larp7	0.0395329	-1.07	6.3242	6.0929	15.353	3.2531	4.638	4.2516
P37913	DNLI1	Lig1	0.0392014	-0.706	72.107	98.279	160.67	78.656	60.025	55.556
Q8C052	MAP1S	Map1s	0.0403053	-0.889	12.574	19.731	15.223	7.3548	6.8839	11.742
Q8R3C0	MCMBP	Mcmbp	0.0398693	-1.7	4.1391	7.6812	10.195	0	2.9081	3.7437
Q8R0G9	NU133	Nup133	0.0396736	-0.829	9.9766	15.553	11.518	7.5771	4.7265	8.9065
P56183	RRP1	Rrp1	0.0395525	-2.49	8.6181	14.737	4.2426	0	0	5.8925
Q8K2B3	SDHA	Sdha	0.0402993	-0.678	42.123	64.125	95.257	42.649	37.71	39.082
G3X972	G3X972	Sec24c	0.0392347	-1.01	18.145	13.032	20.705	6.9595	7.6754	11.131
Q9D3D9	ATPD	Atp5d	0.0406078	1.4	0	0	3.0936	4.4488	2.4685	2.1716
P28658	ATX10	Atxn10	0.0408121	-0.737	14.702	33.44	28.656	18.984	10.462	15.316
Q9Z1S0	BUB1B	Bub1b	0.0419831	-1.2	4.6028	4.9267	2.9437	1.3901	1.6998	2.346
P80316	TCPE	Cct5	0.0418138	-0.628	303.71	461.34	580.63	371.52	202.66	292.67
Q9QYB1	CLIC4	Clic4	0.0419258	-1.34	9.6745	17.861	20.883	3.7697	4.4575	13.118
Q91W50	CSDE1	Csde1	0.0408093	-0.681	44.499	65.006	65.073	49.208	31.312	29.657
O88487	DC1I2	Dync1i2	0.0411286	-0.817	4.8358	4.8827	11.317	4.3533	2.8776	3.8987
A2AJ72	A2AJ72	Fubp3	0.0411091	-0.627	44.961	61.336	89.633	45.223	34.902	42.493
P60521	GBRL2	Gabarapl2	0.0415969	-1.72	7.1833	7.6293	6.0159	1.5157	1.0145	6.0041
Q8CCP0	NEMF	Nemf	0.0420323	-0.83	4.9921	7.993	6.6779	3.1793	4.013	3.7153
Q9DCL9	PUR6	Paics	0.0408088	-0.834	225.75	411.66	340.16	253.5	103.78	212.17
O35134	RPA1	Polr1a	0.0409281	-0.881	5.1535	9.3792	8.3533	7.0873	3.1079	2.9358
Q8C5R8	Q8C5R8	Prps1l1	0.0414143	-0.957	2.9853	7.1949	10.972	2.9164	2.9485	3.7494
P62301	RS13	Rps13	0.0411012	-0.599	250.69	340.58	402.68	248.75	184.92	215.09
Q99NB9	SF3B1	Sf3b1	0.0418224	-1.19	27.654	55.556	22.078	15.901	9.2034	19.32
Q8BU11	TOX4	Tox4	0.0412852	-1	1.2363	2.1824	1.2813	0.76508	0.90317	0
Q8R5H1	UBP15	Usp15	0.0411904	-1.01	3.611	11.111	11.184	6.1498	3.0837	2.8713
Q60596	XRCC1	Xrcc1	0.0412741	-1.08	4.2006	11.498	10.576	2.8174	3.4415	5.59
Q921H8	THIKA	Acaa1a	0.0423089	-1.07	4.3964	17.724	13.511	7.0899	3.6531	4.3692
Q9EPJ9	ARFG1	Arfgap1	0.0424953	-1.39	4.2205	2.0777	4.8252	0	1.6341	1.6567
Q9WV54	ASAH1	Asah1	0.0433327	-1.35	3.2401	4.63	8.3748	1.474	1.1695	4.4401
Q8VEH6	ZNG1	Cbwd1	0.0429907	5.16	0	0	0	0	159.44	127.01
Q6ZWX6	IF2A	Eif2s1	0.0434143	-0.741	104.42	190.37	219.29	155.8	67.825	88.415
P97310	MCM2	Mcm2	0.0425558	-0.718	137.24	248.96	277.24	132.26	137.08	117.36
Q91WG2	RABE2	Rabep2	0.0434231	-1.33	1.9308	4.4374	1.3592	0	0.74137	1.1479
P70388	RAD50	Rad50	0.0435691	-1.27	2.4154	2.7793	2.0824	0.99103	1.6001	0
Q64213	SF01	Sf1	0.0436728	-1.05	26.404	60.303	27.361	18.153	12.095	22.331
Q60520	SIN3A	Sin3a	0.0429585	-0.941	5.6775	15.092	12.871	8.2605	3.0649	6.1609
Q9CYG7	TOM34	Tomm34	0.0430241	-1.02	9.1546	11.193	23.218	4.9919	6.074	9.4746
Q9ES00	UBE4B	Ube4b	0.0437044	-0.825	4.2325	9.3719	7.5671	3.3559	3.4076	4.7243
Q60737	CSK21	Csnk2a1	0.0445058	-0.632	4.5232	6.7539	8.9071	4.289	3.6303	4.6971
O70152	DPM1	Dpm1	0.0449831	-0.924	0.86855	2.5217	1.6346	1.1151	0.75386	0
P23780	BGAL	Glb1	0.0438975	1.08	1.2278	0	1.8544	3.5737	1.5965	2.6184
P61979	HNRPK	Hnrnpk	0.0444927	-0.672	394.39	620.81	536.13	407.48	227.63	350.16
Q9DC61	MPPA	Pmpca	0.044797	-0.983	7.0662	13.677	10.242	4.2872	6.7364	4.4359
O35226	PSMD4	Psmd4	0.0454709	-0.635	39.618	53.962	57.518	43.315	27.391	27.703
P35979	RL12	Rpl12	0.0445422	-0.614	227.91	374.65	393.77	271.29	154.67	223.42
Q8BP27	SFR1	Sfr1	0.0452176	-1.47	10.646	13.688	11.331	2.0611	5.0632	7.4656
Q8R3H9	TTC4	Ttc4	0.0450266	-1.44	2.0317	3.4164	0	0	0	0
Q91ZJ5	UGPA	Ugp2	0.0444096	-1.83	0	2.7546	8.6578	0	0	0
Q6P5F9	XPO1	Xpo1	0.0440229	-0.765	31.965	56.842	65.613	27.919	32.94	26.417
Q62448	IF4G2	Eif4g2	0.0463714	-0.584	46.168	67.331	84.105	47.741	35.509	45.797
Q99MR6	SRRT	Srrt	0.0456497	-1.03	24.835	74.026	32.565	20.591	18.347	18.447
P17751	TPIS	Tpi1	0.0455941	-0.768	157.76	375.66	299.88	189.81	105.18	180.33
Q9QZE5	COPG1	Copg1	0.0471043	0.718	5.6497	7.3569	14.391	16.496	10.672	15.12
P25206	MCM3	Mcm3	0.0469672	-0.638	166.44	238.7	383.61	198.93	124.08	163.7
Q9CT10	RANB3	Ranbp3	0.0468095	-0.984	17.788	14.205	17.448	6.6039	7.5348	11.451
Q9D0I9	SYRC	Rars	0.0469944	-0.763	55.616	101.59	154.62	85.074	43.55	48.218
O55128	SAP18	Sap18	0.0469435	-1.02	0	1.5072	2.9474	0	0	0
Q921F4	HNRLL	Hnrnpll	0.0473402	-1.4	2.7985	2.6942	6.3941	3.0155	1.3823	0
Q8CFI0	NED4L	Nedd4l	0.0476386	3.02	11.46	0.68571	0	25.964	7.8168	19.313
Q7M753	PANK2	Pank2	0.0473826	-0.643	0.65316	1.2298	1.5227	0	0	0
Q9DBR0	AKAP8	Akap8	0.0488721	-0.902	6.1796	5.926	10.228	3.0302	4.3679	4.3409
Q9Z110	P5CS	Aldh18a1	0.0488632	-0.743	18.731	27.592	32.358	21.107	15.543	10.872
P80318	TCPG	Cct3	0.0491865	-0.729	278.9	609.57	826.39	386.64	238.34	334.69
Q6PAV2	HERC4	Herc4	0.0500123	-1.21	1.577	1.5325	5.5032	1.1458	0	1.5713
P52293	IMA1	Kpna2	0.0493443	-1.02	150.23	497.28	258.62	205.34	87.577	129.87
P97311	MCM6	Mcm6	0.0494779	-0.764	165.58	197.53	322.75	113.19	136.64	139.26
P46460	NSF	Nsf	0.0492063	-0.658	15.081	32.17	35.218	19.883	12.475	17.517
Q8R3Q6	MIX23	Ccdc58	0.0503227	-1.87	2.1894	3.2432	10.792	4.2195	0	0
Q99KK7	DPP3	Dpp3	0.050593	-1.2	16.124	31.978	17.366	6.3939	7.1016	16.182
P19096	FAS	Fasn	0.0511318	-0.676	196.03	274.79	263.76	230.37	109.78	137.89
A0A0A6YVU8	A0A0A6YVU8	Gm9774	0.0505422	-1.61	24.068	25.983	15.675	3.3701	7.2903	14.001
Q8VDM4	PSMD2	Psmd2	0.0505879	-0.757	87.532	118.14	118.4	93.747	59.779	45.299
P32037	GTR3	Slc2a3	0.0505841	-0.717	187.98	161.76	297.7	156.09	110.06	118.54
Q7TQH0	ATX2L	Atxn2l	0.0518937	-0.705	48.806	68.575	52.61	42.883	25.396	37.35
Q6ZQ08	CNOT1	Cnot1	0.0515072	-1.04	29.754	44.09	25.497	29.334	10.537	12.461
Q3UHU5	MTCL1	Mtcl1	0.0512619	-0.828	0.90293	1.5943	0	0.64835	0	0
Q9QXK2	RAD18	Rad18	0.0512945	-0.948	0.89508	2.002	0	0	0.48158	0.55676
O89090	SP1	Sp1	0.0515248	-0.694	0.72535	1.1547	2.0481	0	0	0.78717
Q60875	ARHG2	Arhgef2	0.0525164	-1.52	4.3827	9.9657	3.8222	1.0733	3.0496	2.1495
P62814	VATB2	Atp6v1b2	0.052341	-0.588	66.884	103.55	100.74	74.563	50.759	54.238
Q920E5	FPPS	Fdps	0.0526393	-0.689	25.319	42.882	54.027	22.92	19.562	31.249
P08113	ENPL	Hsp90b1	0.0525804	-0.615	392.34	455.69	731.1	378.83	300.61	319.58
Q9JIY5	HTRA2	Htra2	0.052818	-0.615	1.4537	1.6758	2.212	1.292	0.8592	1.3502
E9PVX6	KI67	Mki67	0.0531725	-1.84	7.7564	5.5582	3.2284	0	3.2421	1.0763
Q9CXK9	RBM33	Rbm33	0.0526466	-1.05	1.3991	2.2307	2.2213	0	1.4558	0
F6ZDS4	TPR	Tpr	0.0525288	-1.07	70.275	79.201	39.728	33.834	25.453	28.026
Q91WN1	DNJC9	Dnajc9	0.0541937	0.816	2.7412	2.5779	5.7854	7.3729	6.2161	4.8668
Q8R3G1	PP1R8	Ppp1r8	0.0545398	-0.699	0.92786	1.5578	1.1833	0	0.72669	0.63376
O55234	PSB5	Psmb5	0.0540155	-0.598	11.725	19.354	23.826	13.961	8.4025	13.303
Q3UJB9	EDC4	Edc4	0.0553469	-0.659	27.407	35.483	49.409	35.887	17.347	19.588
Q921E6	EED	Eed	0.0553658	-1.4	2.7902	7.3368	3.7998	0	1.5896	3.0464
P23475	XRCC6	Xrcc6	0.0556512	-0.83	9.2147	7.6537	12.4	4.585	4.9171	6.9048
Q9CY64	BIEA	Blvra	0.0569748	-0.737	0.81593	2.065	1.7947	0	0.85536	0.87842
Q62418	DBNL	Dbnl	0.0558767	-0.972	10.218	8.3594	9.8721	6.6951	2.4929	6.6905
Q80Y81	RNZ2	Elac2	0.0560347	-1.27	3.0011	2.939	9.5375	1.7914	2.8164	1.2009
Q9Z247	FKBP9	Fkbp9	0.0558942	1.28	0	3.5571	2.7925	6.9294	3.4294	3.6202
Q8BMJ2	SYLC	Lars	0.0562836	-0.618	32.104	36.235	55.063	29.375	25.156	24.002
P27546	MAP4	Map4	0.0565752	-0.71	117.78	155.44	117.43	98.117	59.277	84.512
P97868	RBBP6	Rbbp6	0.0567774	-1.84	4.7286	15.967	6.1218	0	2.2658	5.1445
P62843	RS15	Rps15	0.0569535	-1.18	57.312	106.07	88.435	41.905	15.483	71.681
Q9Z2I9	SUCB1	Sucla2	0.0566513	-0.647	10.006	19.359	17.713	9.458	8.8398	10.683
Q14CH7	SYAM	Aars2	0.0582376	-0.968	2.0776	1.8069	1.6872	1.3177	1.0298	0
Q99LE6	ABCF2	Abcf2	0.0581959	-0.729	12.876	23.903	37.242	20.587	10.017	12.209
Q62167	DDX3X	Ddx3x	0.0571472	-0.728	199.88	217.07	453.77	234.55	125.74	146.9
Q61699	HS105	Hsph1	0.0582426	-0.994	42.76	172.18	178.95	64.918	44.815	57.273
P09405	NUCL	Ncl	0.0574716	-0.771	1171.4	991.94	1922.3	741.58	633.46	957.86
P47964	RL36	Rpl36	0.0577119	-0.789	25.827	23.653	36.715	14.193	18.022	16.994
P84084	ARF5	Arf5	0.0586514	-1.99	7.9543	17.274	12.06	0	3.9341	7.7133
Q9CY16	RT28	Mrps28	0.0584145	-0.971	1.9752	1.6471	2.5335	1.8224	0.96342	0
Q922D8	C1TC	Mthfd1	0.0588979	-0.593	260.32	467.22	608.19	329.71	248.4	263.33
P20108	PRDX3	Prdx3	0.0597005	1.77	0	0	6.3934	5.1783	3.834	5.2895
Q0VBL3	RBM15	Rbm15	0.0584695	-0.772	1.258	3.2993	2.035	1.5588	0.92563	1.1759
Q6ZWV7	RL35	Rpl35	0.0588476	-0.758	28.883	28.447	68.029	25.108	20.295	22.683
P32921	SYWC	Wars	0.0593193	-1.03	11.84	9.7334	24.769	13.531	4.0119	6.2015
Q9WVA3	BUB3	Bub3	0.0607581	-0.663	28.589	52.757	43.827	33.311	16.799	29.743
P12787	COX5A	Cox5a	0.0598111	-1.64	3.3114	5.4039	2.1022	3.3799	0	0
Q6NVF9	CPSF6	Cpsf6	0.0603424	-0.762	29.825	47.78	35.725	32.09	13.164	24.688
P56960	EXOSX	Exosc10	0.060149	-1.2	2.4303	3.272	1.4459	1.5184	1.0118	0
P97351	RS3A	Rps3a	0.0609671	-0.556	506.63	646.02	941.92	513.94	388.85	485.18
Q6P1B1	XPP1	Xpnpep1	0.0608372	-1.21	2.8219	8.4263	7.205	5.179	1.0002	2.6481
P16332	MUTA	Mut	0.0617092	-0.935	0	1.5272	2.8244	0	0.69039	0
Q7TSC1	PRC2A	Prrc2a	0.0622154	1.15	0	0	2.8625	2.8273	2.4021	1.9326
Q9D1R9	RL34	Rpl34	0.0623932	-1.44	83.094	118.47	53.336	15.85	31.339	52.493
O55143	AT2A2	Atp2a2	0.0642589	-0.544	39.769	60.721	84.133	47.11	34.56	40.272
Q3TDN2	FAF2	Faf2	0.0627578	-0.972	1.1308	2.2995	0	0	0	0
Q8BX02	KANK2	Kank2	0.0627408	-1.14	4.4576	3.6781	2.0189	1.4547	1.3807	1.534
Q9JK91	MLH1	Mlh1	0.0640789	-0.695	1.5323	3.0653	2.0274	1.7677	0.96207	1.319
Q8VIJ6	SFPQ	Sfpq	0.0636221	-0.616	297.19	313.03	536.72	254.54	210.21	258.98
Q9CYR0	SSBP	Ssbp1	0.0632406	-0.779	25.219	20.417	44.86	16.361	16.465	16.986
Q9R0P9	UCHL1	Uchl1	0.063394	1.02	0	1.4777	2.4354	2.1299	3.3986	2.5345
Q8R5C5	ACTY	Actr1b	0.0651273	-0.59	7.2648	13.707	11.359	7.9877	5.5579	7.4747
Q9CR51	VATG1	Atp6v1g1	0.0655345	-1.54	6.842	6.5047	11.224	6.0545	0.73199	4.5689
Q9Z0N1	IF2G	Eif2s3x	0.0655242	-0.584	99.48	190.95	244.81	132.77	92.952	111.91
Q6PGH2	JUPI2	Hn1l	0.0654511	-0.83	5.3902	3.3178	4.9141	2.8582	2.0142	2.715
P11499	HS90B	Hsp90ab1	0.0659414	-0.656	5276.9	4931.4	9096.3	4086	3519.1	4206.6
P15532	NDKA	Nme1	0.0649886	-2.36	14.576	21.744	30.161	0	5.2429	15.67
P99026	PSB4	Psmb4	0.0649488	-0.759	20.156	57.864	45.445	22.06	20.345	24.376
P62192	PRS4	Psmc1	0.0644577	-0.602	53.115	102.42	82.003	63.869	40.864	48.856
Q3UA37	QRIC1	Qrich1	0.0646601	-1.19	3.2037	8.1233	2.8327	2.0818	1.0449	2.8526
P62878	RBX1	Rbx1	0.0659629	-0.603	5.3412	10.984	8.827	6.3111	4.4915	5.2156
P19253	RL13A	Rpl13a	0.0656009	-0.68	104.86	241.93	189.96	114.74	79.066	129.2
Q9CQR2	RS21	Rps21	0.064468	-0.623	42.25	53.954	59.079	38.579	22.614	42.227
P62317	SMD2	Snrpd2	0.0659361	-0.542	68.442	84.928	94.853	64.553	47.231	58.583
Q9DBR1	XRN2	Xrn2	0.0655621	-1.01	5.9251	11.514	9.8541	2.8608	6.0779	4.7699
P28352	APEX1	Apex1	0.0668259	-0.592	20.674	36.642	48.944	26.744	16.012	25.275
Q9D4H8	CUL2	Cul2	0.0665649	-0.889	2.0212	4.5566	6.355	1.7947	2.6711	1.9206
P60229	EIF3E	Eif3e	0.0672818	-0.655	61.581	122.42	85.735	72.217	45.968	49.879
Q64523	H2A2C	Hist2h2ac	0.0659952	2.09	0	0	9.4954	5.4311	7.4861	7.4751
Q9D6R2	IDH3A	Idh3a	0.0668014	-0.723	31.533	26.67	59.755	24.727	18.028	25.046
P47962	RL5	Rpl5	0.066391	-0.609	194.05	375.57	500.55	235.82	185.06	235.49
Q62179	SEM4B	Sema4b	0.0669586	-0.667	0	1.5408	1.378	0	0	0
Q62261	SPTB2	Sptbn1	0.0660333	-0.793	48.192	71.103	56.597	59.986	23.082	26.902
Q99KI0	ACON	Aco2	0.0691092	-0.582	77.324	125.45	112.43	72.404	66.11	67.869
P80317	TCPZ	Cct6a	0.0694814	-0.643	353.48	411.82	627.51	457.99	204.77	256.02
Q9JJY4	DDX20	Ddx20	0.0694615	-1.56	3.6006	5.2982	1.5865	0	0	2.3058
Q9CSH3	RRP44	Dis3	0.0692122	-0.794	10.469	15.934	13.95	6.0571	9.1953	8.0081
Q9CQ22	LTOR1	Lamtor1	0.0692689	-1.53	2.1064	0	5.5473	0	0.62189	0
Q9CR95	NECP1	Necap1	0.0687905	-0.726	6.3252	6.2115	9.559	5.7646	2.5614	5.6264
P19426	NELFE	Nelfe	0.06917	-0.931	1.1678	2.178	2.0111	0	1.3629	0
P50580	PA2G4	Pa2g4	0.0686503	-0.622	212.49	438.15	429.92	326.3	170.57	197.48
O70435	PSA3	Psma3	0.0685041	-0.6	43.845	80.319	101.9	62.545	32.308	50.977
P62827	RAN	Ran	0.0688157	-0.616	339.28	660.08	639.9	328.55	307.48	393.96
Q3UJB0	SF3B2	Sf3b2	0.0688616	-1.03	9.4086	17.532	26.78	5.5045	12.039	7.7506
Q9R0T7	TRY4	Try4	0.0685706	-2.22	2.881	0	16.442	0	0	0
Q8VDF2	UHRF1	Uhrf1	0.0686863	-0.909	18.156	39.35	27.619	10.383	13.953	20.566
Q91Z53	GRHPR	Grhpr	0.071126	-0.595	14.772	13.617	20.486	12.447	8.7831	10.93
Q61595	KTN1	Ktn1	0.0696583	-1.23	1.7056	4.7384	5.4142	0	1.3555	2.9071
P33609	DPOLA	Pola1	0.0714754	-1.38	2.7205	0	3.0238	0	0	0
Q9R1P4	PSA1	Psma1	0.0706913	-0.547	58.087	72.188	98.259	52.801	45.606	54.885
Q91XV3	BASP1	Basp1	0.0728902	-2.43	14.428	9.2168	1.1112	0	0	1.8331
P00375	DYR	Dhfr	0.0724115	-1.16	14.155	51.857	42.026	23.255	5.905	20.043
Q8R080	GTSE1	Gtse1	0.071961	0.863	3.5958	3.9044	2.6622	5.4242	5.8506	7.0868
Q2YDW2	MSTO1	Msto1	0.071942	-0.641	12.111	22.335	23.405	14.131	12.714	9.2933
Q99KG3	RBM10	Rbm10	0.0725112	-1.06	4.7368	13.219	6.9078	6.1176	3.802	2.0688
Q14B01	Q14B01	Rnf113a2	0.0718077	-0.727	1.5913	1.5676	1.8497	0	0.89014	1.316
Q9D706	RPAP3	Rpap3	0.0734537	-0.549	2.9291	3.2364	3.7439	2.6093	1.8847	2.3063
Q9JMH6	TRXR1	Txnrd1	0.0731777	-0.517	35.805	59.827	73.157	47.411	30.322	37.184
Q5XG71	UTP20	Utp20	0.0717152	-1.33	10.692	14.598	11.592	9.3941	6.5043	1.8576
Q70FJ1	AKAP9	Akap9	0.0750353	-2.25	7.6995	18.225	2.9326	0	0.70519	6.212
Q61553	FSCN1	Fscn1	0.0749743	-1	24.682	38.145	61.414	12.348	17.301	33.845
Q64737	PUR2	Gart	0.0752594	-0.652	270.23	299.16	636.72	276.64	218.22	219.58
O55023	IMPA1	Impa1	0.0740646	-0.589	29.758	30.33	45.366	25.589	17.213	27.299
O35972	RM23	Mrpl23	0.0736235	-0.744	1.056	1.5306	0	0	0	0
Q9D0T1	NH2L1	Nhp2l1	0.0740992	-0.72	13.461	23.294	32.782	11.208	14.962	13.715
Q8BH74	NU107	Nup107	0.0745167	-0.792	6.3946	7.2515	7.5765	4.4415	2.383	6.398
Q3TKT4	SMCA4	Smarca4	0.0746349	-1.17	12.873	29.035	12.834	9.4785	3.3684	13.125
Q9ERA6	TFP11	Tfip11	0.0738828	-0.828	3.3847	3.3569	2.7796	1.7974	2.0739	1.5154
P68037	UB2L3	Ube2l3	0.0742906	-1.69	1.9298	0	8.1213	0	0	0
P61089	UBE2N	Ube2n	0.0751509	-0.534	44.581	74.576	82.572	61.756	36.331	40.31
P61982	1433G	Ywhag	0.0749784	-0.533	318.06	568.7	598.86	384.8	250.44	371.1
Q9JIX8	ACINU	Acin1	0.0768174	-0.911	24.078	20.553	20.913	8.9816	9.7504	17.77
Q61081	CDC37	Cdc37	0.0760835	-0.893	35.144	27.984	40.188	17.075	11.67	30.962
P09803	CADH1	Cdh1	0.0767226	-0.654	6.313	12.604	9.6559	8.3186	5.1385	4.6169
Q6ZQ03	FNBP4	Fnbp4	0.0774093	-1.92	7.4669	6.3448	3.0302	0	0	5.1823
Q8BHL4	RAI3	Gprc5a	0.0776015	-0.681	1.7551	2.6399	1.86	1.4254	0.92035	1.5952
P63085	MK01	Mapk1	0.0761629	-0.665	52.852	99.187	105.86	84.543	41.842	39.353
P43247	MSH2	Msh2	0.0768584	-0.537	168.48	236.71	239.06	153.23	134.04	151.98
P08775	RPB1	Polr2a	0.0758552	-0.835	13.096	34.469	23.455	20.427	10.727	8.5111
P14685	PSMD3	Psmd3	0.0776441	-0.705	13.65	30.386	22.611	13.95	8.8085	17.636
Q62318	TIF1B	Trim28	0.0760466	-0.7	438.37	1117.1	880.09	680.09	392.72	376.43
P09242	PPBT	Alpl	0.0791303	-0.645	15.338	24.927	33.032	14.764	17.192	13.008
Q921W0	CHM1A	Chmp1a	0.0802782	-0.561	1.7632	2.0822	3.6946	2.0958	1.2967	1.5532
Q3UHC7	DAB2P	Dab2ip	0.0800086	0.916	0	0	0	0	1.6682	1.8026
Q61739	ITA6	Itga6	0.0789647	-0.716	19.87	18.14	24.468	21.386	8.9828	10.348
Q5SVQ0	KAT7	Kat7	0.0788175	-1.02	1.4516	6.6985	3.0536	1.5345	1.624	1.4169
Q69ZX6	MOR2A	Morc2a	0.0790161	-0.698	0.63806	1.4706	1.1022	0	0	0.4701
Q9D6Z1	NOP56	Nop56	0.0795665	-0.588	34.914	51.817	78.037	33.808	34.574	35.573
P19324	SERPH	Serpinh1	0.0782669	-0.614	40.331	60.317	111.19	51.747	37.107	39.295
Q921F2	TADBP	Tardbp	0.0794037	-0.576	44.148	50.458	63.077	38.02	25.42	43.932
P14211	CALR	Calr	0.0809982	-0.555	74.984	101.33	121.17	63.781	57.195	79.644
P40240	CD9	Cd9	0.0827271	-3.51	24.509	3.0656	153.87	0	0	15.196
O35465	FKBP8	Fkbp8	0.080813	-0.77	4.5619	13.118	15.592	8.5671	4.0037	5.4838
Q8BLH7	HIRP3	Hirip3	0.082147	-1.41	4.8933	4.8995	5.0754	2.2418	0	4.8552
Q69ZK6	JHD2C	Jmjd1c	0.081135	-0.601	0	1.4448	1.2824	0	0	0
B2RRE7	OTUD4	Otud4	0.0813518	-0.931	1.346	5.4246	5.6071	1.83	1.422	2.2708
Q8CIN4	PAK2	Pak2	0.0807562	-0.536	25.77	33.659	51.779	30.319	17.783	27.308
P35279	RAB6A	Rab6a	0.0805878	-0.624	16.816	24.526	29.624	17.005	16.908	11.613
Q9CPR4	RL17	Rpl17	0.0824217	-0.904	95.763	87.81	173.74	41.812	58.128	91.816
Q91YQ5	RPN1	Rpn1	0.0809788	-0.693	52.669	104.8	100.13	79.251	28.905	57.047
P62702	RS4X	Rps4x	0.0824189	-0.521	354.03	480.33	614.74	425.15	228.12	364.51
Q60864	STIP1	Stip1	0.080635	-0.668	242.09	223.16	317.17	164.48	118.21	219.74
Q8C4J7	TBL3	Tbl3	0.0810839	-0.856	1.9272	2.6093	2.5464	0	1.5175	1.6373
P70398	USP9X	Usp9x	0.0821287	-0.822	8.951	20.332	10.494	11.224	4.5529	6.7601
P63101	1433Z	Ywhaz	0.0822631	-0.508	523.13	847.36	986.69	694.37	387.66	564.79
Q9QXG2	RAE1	Chm	0.0848473	-0.652	0.92293	1.3367	0	0	0	0.57598
Q91VR5	DDX1	Ddx1	0.0835822	-1.72	6.79	22.192	25.275	14.728	1.1001	6.5908
Q9EPL8	IPO7	Ipo7	0.0835037	-0.894	12.372	47.605	27.901	20.116	8.519	14.947
Q8C854	MYEF2	Myef2	0.0841518	-0.923	5.5643	4.9478	5.4199	1.9904	3.7673	2.9191
P57716	NICA	Ncstn	0.0834694	0.986	1.3425	0	2.0181	3.5849	2.3545	1.7187
O88643	PAK1	Pak1	0.083935	-0.653	6.2909	5.7657	10.054	4.3006	4.6778	4.6588
Q9DBJ1	PGAM1	Pgam1	0.0846182	-0.74	189.51	410.1	594.56	290.86	126.48	269.47
P62717	RL18A	Rpl18a	0.0836308	-1.09	42.436	75.823	120.02	18.554	42.554	50.792
P56394	COX17	Cox17	0.086175	-0.705	2.9986	2.4431	5.1951	2.4808	1.3754	2.5756
Q3UMU9	HDGR2	Hdgfrp2	0.0860635	-0.611	1.6891	2.551	2.7814	1.5961	0.99984	2.1068
Q8BKC5	IPO5	Ipo5	0.0853509	-0.617	77.783	145.62	240.66	110.94	78.316	86.981
Q9R0A0	PEX14	Pex14	0.0861102	-1.1	3.4574	1.7653	1.8117	1.8212	0	1.0429
P35235	PTN11	Ptpn11	0.0851809	-1.32	2.5706	3.6376	0	0	0	1.0959
Q8C1B1	CAMP2	Camsap2	0.0884905	-1.27	26.985	27.427	20.234	5.0126	10.762	19.706
Q6ZPY7	KDM3B	Kdm3b	0.0880414	-0.674	10.344	10.843	11.05	11.115	4.6383	5.9204
Q921Y0	MOB1A	Mob1a	0.0881954	-1.13	2.4374	4.0647	5.6344	0	2.3819	2.5889
Q8VH51	RBM39	Rbm39	0.0884525	1.39	26.073	8.3094	7.5236	32.657	21.505	41.494
Q8C1B7	2025-09-11	2025-09-11	0.089354	-0.656	35.125	84.838	51.801	40.123	30.045	32.701
Q60649	CLPB	Clpb	0.0901992	-0.675	0.89576	2.1797	1.4444	0	0.73711	1.0832
Q60876	4EBP1	Eif4ebp1	0.0899706	-1.55	4.5368	0	2.5674	0	0	0
Q8K0G5	EIPR1	Tssc1	0.089577	-0.685	0.76305	1.5445	0.91105	0.81211	0	0.53606
Q5U452	Q5U452	2810408M09Rik	0.0912569	-0.63	0.75137	1.8076	1.192	0.87583	0	0.84167
P42932	TCPQ	Cct8	0.0921117	-0.484	606.89	1024.5	982.71	727.95	485.1	633.04
O88569	ROA2	Hnrnpa2b1	0.0912389	-0.629	244.7	341.51	355.23	167.12	189.09	253.81
P33611	DPOA2	Pola2	0.0914526	-0.612	3.7642	6.2979	5.5078	4.9769	2.031	3.6153
Q9DBR7	MYPT1	Ppp1r12a	0.0913614	-0.766	5.5379	8.6588	15.879	5.5783	6.8357	4.0635
Q91VU7	PUS7	Pus7	0.0920269	-0.564	4.0188	4.2468	4.4572	3.524	2.6035	2.5685
P47915	RL29	Rpl29	0.0926159	-0.977	122.73	149.44	89.229	42.301	54.524	93.041
Q9Z315	SNUT1	Sart1	0.0917831	-1.13	3.4045	8.8836	6.8388	1.4051	3.8011	3.706
Q9CY58	SERB1	Serbp1	0.0924249	-1.56	400.92	322.56	162.25	61.509	50.981	263.13
P84244	H33	H3f3a	0.0943895	1.13	59.232	190.42	462.2	415.14	423.08	309.22
Q3UV17	K22O	Krt76	0.0938666	-0.755	302.47	425.73	505.87	170.81	292.86	270.76
P29758	OAT	Oat	0.0945603	0.969	3.8325	2.7292	11.36	9.8579	7.2122	12.531
Q6NS46	RRP5	Pdcd11	0.0936782	-0.799	1.8105	3.9897	5.2804	3.0511	0.97779	2.4262
P12970	RL7A	Rpl7a	0.0937592	-0.527	316.44	365.25	616.47	385.12	232.51	265.82
P62852	RS25	Rps25	0.0947072	-0.505	72.84	103.27	105.87	91.309	52.768	57.788
P62908	RS3	Rps3	0.0941696	-0.581	523.01	821.17	765.09	662.14	286.2	518.35
Q9CU62	SMC1A	Smc1a	0.0934962	-0.743	7.0342	15.734	10.816	5.5626	7.6435	6.0109
Q9QYC0	ADDA	Add1	0.0952898	-0.687	2.1616	2.7121	2.1799	1.5414	1.6746	1.1869
O08810	U5S1	Eftud2	0.095018	-0.653	59.494	90.735	101.09	64.623	60.574	35.843
Q62446	FKBP3	Fkbp3	0.095828	-0.54	76.34	89.822	154.22	73.713	57.228	81.58
Q9QZQ1	AFAD	Mllt4	0.0954361	-1.04	1.8784	4.9384	3.2372	0	2.053	1.9233
Q8BHG1	NRDC	Nrd1	0.0957062	-0.787	1.3705	4.0378	2.7171	1.5913	1.7026	1.0793
Q5SUR0	PUR4	Pfas	0.0971231	-0.498	75.162	89.753	123.64	90.267	56.12	58.403
P52480	KPYM	Pkm	0.0960695	-0.776	1914	5044.9	5171.7	3999.6	1371.4	1815
Q9CZW5	TOM70	Tomm70a	0.0964602	-1.16	3.7182	14.413	16.935	2.5318	5.2972	6.0319
Q571I9	A16A1	Aldh16a1	0.0977769	-1.44	7.4037	13.325	11.274	1.3406	5.4374	7.6296
Q8QZY1	EIF3L	Eif3l	0.099479	-1.15	27.433	57.306	61.006	50.187	6.9577	25.218
Q7TSZ8	NACC1	Nacc1	0.0979166	-0.874	1.6598	5.3223	8.7264	2.994	2.0877	2.005
Q7TQK0	CCNT2	Ccnt2	0.100467	-0.747	1.1354	1.6995	0.89819	0.97939	0	0.63102
P35505	FAAA	Fah	0.101989	-0.763	6.1874	4.9486	9.5964	3.0193	3.9836	5.0029
Q80UM3	NAA15	Naa15	0.101867	-0.745	13.464	31.09	44.648	12.854	16.419	18.823
Q8C156	CND2	Ncaph	0.102073	-1.79	7.0327	11.536	14.224	6.5962	6.731	0
P62889	RL30	Rpl30	0.101997	-0.993	58.075	83.442	166.34	110.92	35.755	25.774
P62082	RS7	Rps7	0.100577	-0.449	89.863	129.96	149.75	110.79	70.913	87.522
Q923E4	SIR1	Sirt1	0.100683	-0.594	2.2026	3.3823	2.29	1.9798	1.3685	1.8296
P97496	SMRC1	Smarcc1	0.101919	-0.717	36.45	31.064	86.979	34.07	26.275	24.758
Q569Z6	TR150	Thrap3	0.100523	-0.81	4.4069	8.1419	11.897	3.0429	5.5111	4.7266
P10639	THIO	Txn	0.100969	-1.12	63.054	133.98	110.06	51.569	17.068	102.07
Q9DBG3	AP2B1	Ap2b1	0.103305	-0.648	13.587	28.313	16.864	17.055	9.4493	10.464
Q9DBE9	SPB1	Ftsj3	0.103426	-0.608	0.81926	1.4895	0	0	0	0
P56959	FUS	Fus	0.103158	-0.963	63.654	30.242	108.21	38.628	19.011	38.31
Q99KP6	PRP19	Prpf19	0.102684	-0.808	33.275	99.667	142.26	71.021	33.042	37.455
Q9JJI8	RL38	Rpl38	0.102257	-1.07	37.398	15.824	43.915	9.9743	15.614	18.112
P62869	ELOB	Tceb2	0.104579	-0.489	5.63	7.9064	7.2053	5.4977	4.2768	4.9342
P40142	TKT	Tkt	0.102236	-0.498	725.39	836.59	1384.5	833.04	510.6	701.82
Q7TPR4	ACTN1	Actn1	0.104924	-0.811	26.452	18.877	45.238	14.661	20.365	14.008
Q8CHT0	AL4A1	Aldh4a1	0.106093	-0.645	12.746	33.235	19.811	17.233	9.7439	13.072
P17427	AP2A2	Ap2a2	0.105974	-0.558	20.343	36.306	37.681	26.701	21.026	15.534
P63154	CRNL1	Crnkl1	0.106378	-0.996	0	2.6846	0.82878	0.61455	0.44305	0
Q3TXU5	DHYS	Dhps	0.106822	-0.664	2.2518	2.3398	5.7585	2.8575	1.3578	1.9638
O70251	EF1B	Eef1b	0.106041	-1.25	24.857	35.272	37.733	6.1292	11.557	34.562
Q9D8N0	EF1G	Eef1g	0.106479	-0.489	473.66	713.98	901.78	471.99	429.55	544.32
Q9D0M0	EXOS7	Exosc7	0.104691	-0.601	2.8584	6.5121	4.7956	4.4161	2.1814	2.6573
Q9JKR6	HYOU1	Hyou1	0.105096	-0.671	42.235	75.524	42.109	40.009	29.572	28.111
O35685	NUDC	Nudc	0.107293	-0.566	107.4	106.72	107.65	77.567	61.037	80.28
Q8BHG2	CZIB	Q8BHG2	0.107406	0.78	NA	NA	NA	NA	NA	NA
P35278	RAB5C	Rab5c	0.106018	-1.06	17.906	21.794	31.314	5.9365	19.271	11.813
P50247	SAHH	Ahcy	0.107718	-0.492	181.34	370.14	366.21	260.74	156.57	216.67
E9Q8D0	DJC21	Dnajc21	0.108006	-0.952	0.64658	3.1273	1.1494	0	0	0
Q9QYI3	DNJC7	Dnajc7	0.108171	-0.572	26.583	44.142	40.845	35.499	22.916	17.945
Q05D44	IF2P	Eif5b	0.108089	-1.17	10.426	15.2	27.839	23.297	3.9694	4.2207
E9PVA8	GCN1	Gcn1l1	0.1078	-0.529	21.792	26.132	23.797	18.853	12.832	18.63
P62874	GBB1	Gnb1	0.109416	-0.788	5.8457	17.042	21.466	6.1434	6.7506	10.02
Q9R1Q7	PLP2	Plp2	0.109593	-0.525	30.191	37.558	34.073	32.443	18.156	22.012
Q7TMK9	HNRPQ	Syncrip	0.109475	-0.521	67.878	110.61	159.3	108.65	52.674	70.718
P97429	ANXA4	Anxa4	0.110355	-0.497	4.7457	7.1652	11.034	5.4803	4.8233	5.0508
Q9JHS4	CLPX	Clpx	0.113055	-0.614	6.2839	9.1557	7.5509	5.7986	3.0533	6.8381
P26040	EZRI	Ezr	0.110893	-0.592	94.884	125.41	268.23	102.63	87.255	104.11
Q3TLS3	GDPP1	Gdpgp1	0.110305	-0.653	0.89794	1.7448	0	0	0	0.73017
C0HKE5	H2A1G	Hist1h2aa	0.113129	1.12	124.98	483.77	835.69	717.42	1191.7	609.76
Q9WTI7	MYO1C	Myo1c	0.11271	1.12	1.2352	3.0169	5.898	10.489	7.8537	2.759
E9PWG6	E9PWG6	Ncapg	0.112991	-0.739	4.5917	9.9607	14.835	9.5934	4.0507	3.752
P58281	OPA1	Opa1	0.110734	0.687	0	0	0	0	1.3347	1.3983
Q9DCD0	6PGD	Pgd	0.111205	-0.467	99.33	156.5	229.48	134.48	89.97	111.64
Q8CIG8	ANM5	Prmt5	0.113077	-0.883	24.926	53.044	68.822	52.088	20.745	13.434
P62281	RS11	Rps11	0.110349	-0.45	167.16	204.16	237.53	171.76	122.7	151.02
P62849	RS24	Rps24	0.111477	-0.567	35.656	47.541	76.314	55.527	24.83	28.858
P11031	TCP4	Sub1	0.113163	-0.648	3.2454	5.7353	5.8266	2.5778	2.3267	4.7028
Q7TMM9	TBB2A	Tubb2a	0.113188	-0.635	5.0816	6.9697	4.4727	4.0611	3.2858	3.1731
Q9D1C1	UBE2C	Ube2c	0.112372	-0.572	9.4513	10.019	12.826	9.1677	7.4865	5.3819
P53995	APC1	Anapc1	0.114075	-1.53	1.1856	4.4245	15.599	0	2.3769	1.6323
Q03147	CDK7	Cdk7	0.114405	0.51	0	0.92691	0	1.219	1.2205	1.0139
P59325	IF5	Eif5	0.115936	-0.516	34.708	34.375	56.254	32.301	27.63	25.697
Q9CZD3	GARS	Gars	0.114942	-0.663	155.77	346.77	605.13	268.16	144.14	212.91
P19157	GSTP1	Gstp1	0.115951	1.96	0	0	14.703	7.2126	6.3309	7.902
P51859	HDGF	Hdgf	0.11543	-0.512	21.134	19.069	28.397	19.951	13.033	15.189
P20029	BIP	Hspa5	0.113326	-0.574	730.11	598.93	1188.6	685.62	455.59	504.33
Q8VHN8	TIRR	Nudt16l1	0.115566	-0.988	1.1164	3.4953	4.8039	2.597	0	1.5588
Q8R5F3	OARD1	Oard1	0.115353	-1.46	5.6259	9.3705	8.4142	0	3.9759	6.134
Q9R0E1	PLOD3	Plod3	0.114287	-0.645	0.72978	1.2757	2.0721	1.3633	0	0
Q8VE18	SMG8	Smg8	0.113428	-1.79	4.588	23.413	12.523	0	4.3328	8.5818
P61166	TM258	Tmem258	0.114357	-0.612	3.5692	4.5172	4.847	4.0171	1.5462	3.5272
Q9ESJ0	XPO4	Xpo4	0.115873	-0.491	0	1.0349	1.496	0	0.62335	0
P59017	B2L13	Bcl2l13	0.118558	-0.537	4.1434	9.1207	6.3461	5.2919	3.3579	4.4164
P29391	FRIL1	Ftl1	0.117238	0.734	31.511	23.781	76.367	77.707	49.611	68.332
Q61584	FXR1	Fxr1	0.117674	-0.531	59.205	106.83	74.929	70.297	43.142	51.801
Q3V0M1	Q3V0M1	Gm906	0.116797	-2.18	4.4239	8.2683	20.41	17.473	0.73803	0
P33610	PRI2	Prim2	0.119538	-0.824	1.5631	0	1.6541	0	0	0
Q8BIW1	PRUN1	Prune	0.117165	-1.01	1.4661	8.0172	6.695	2.3814	2.5681	1.5916
Q9D8E6	RL4	Rpl4	0.117039	-0.442	291.75	457.41	587.61	345.17	280.18	323.27
Q8BVY0	RL1D1	Rsl1d1	0.119102	-1.07	8.0809	34.412	49.738	7.8242	12.192	15.554
Q7TPE5	S7A6O	Slc7a6os	0.119157	-0.999	4.3531	6.1894	2.0662	2.3453	1.2526	2.376
P21107	TPM3	Tpm3	0.119469	-0.633	9.8037	10.965	7.8117	7.8201	4.4751	6.4364
Q91VX2	UBAP2	Ubap2	0.119139	-0.923	19.081	34.733	14.912	8.767	9.0993	18.177
O55131	2025-09-07	2025-09-07	0.120179	-0.539	49.089	68.062	58.328	40.815	30.438	51.136
C0HKD9	MFA1B	C0HKD9	0.121522	-2.89	NA	NA	NA	NA	NA	NA
P24270	CATA	Cat	0.122902	-0.448	46.394	85.415	84.868	62.276	45.222	47.025
Q8BRN9	C2D1B	Cc2d1b	0.119665	-0.459	3.0232	4.5434	4.2478	3.1638	2.6145	2.7138
Q80VD1	FA98B	Fam98b	0.119995	-1.36	1.2549	10.115	5.1661	0	1.579	2.8149
Q9Z2Z9	GFPT2	Gfpt2	0.119758	-0.978	2.2487	6.0122	5.5154	1.1718	2.3361	3.5672
O35127	C10	Grcc10	0.12045	-0.885	2.6704	2.8072	2.3	0	1.5953	1.9745
Q6PB66	LPPRC	Lrpprc	0.12205	-0.704	12.196	40.686	35.834	14.52	14.804	19.133
P26041	MOES	Msn	0.119845	-0.536	23.452	23.498	38.452	18.887	19.568	18.824
P46935	NEDD4	Nedd4	0.121451	-0.481	64.62	90.914	144.7	70.207	62.643	71.063
P60335	PCBP1	Pcbp1	0.120165	-0.678	367.34	617.38	1071.2	713.71	264.65	313.82
P46471	PRS7	Psmc2	0.12224	-0.512	54.758	106.41	87.382	56.695	46.321	66.912
Q8JZX4	SPF45	Rbm17	0.120488	-0.425	4.8603	6.8342	9.0652	5.7937	4.0176	5.3409
P62267	RS23	Rps23	0.120894	-0.674	701.68	502.72	1152.3	441.97	387.87	584.23
Q80U87	UBP8	Usp8	0.119684	-0.596	2.0656	3.532	2.1506	1.814	1.5243	1.6424
Q3UL36	ARGL1	Arglu1	0.12529	-0.523	35.804	30.898	43.337	31.6	18.609	27.456
Q9CWS0	DDAH1	Ddah1	0.124391	0.606	2.8654	6.2957	10.439	11.408	6.697	8.6838
O55135	IF6	Eif6	0.125508	-0.599	12.075	20.464	25.119	17.244	12.858	8.0558
Q61768	KINH	Kif5b	0.124576	-0.631	15.19	35.575	33.742	19.567	20.031	12.514
Q3V3R1	C1TM	Mthfd1l	0.12395	-0.47	24.559	29.608	45.902	24.617	18.605	27.411
Q8C0L6	PAOX	Paox	0.125064	-1.26	3.931	6.8305	6.7236	0	3.6346	4.1803
P67984	RL22	Rpl22	0.12326	-0.425	75.097	94.333	111.3	81.985	55.578	71.539
Q91WM3	U3IP2	Rrp9	0.124474	-0.78	5.2038	17.793	8.3376	4.8362	5.1721	6.0991
P99024	TBB5	Tubb5	0.123589	-0.763	414.54	1116.2	798.88	846.65	274.48	325.34
Q6J1H4	UTF1	Utf1	0.123173	1.12	0.99625	4.2186	5.9227	5.5179	10.354	4.4642
Q61598	GDIB	Gdi2	0.127553	-0.433	94.277	120.12	184.83	111.31	79.974	95.486
Q61696	HS71A	Hspa1a	0.126942	-0.663	1.3149	0.80092	1.2099	0	0	0
B9EJ54	B9EJ54	Nup205	0.127178	-0.496	6.4136	9.0529	7.1535	6.3375	4.5741	5.1031
Q8CEC0	NUP88	Nup88	0.127542	-0.582	5.1058	7.3324	5.5271	5.6338	3.6463	3.0051
P23492	PNPH	Pnp	0.127513	-0.507	40.738	79.076	71.811	64.392	34.884	35.92
Q6ZWV3	RL10	Rpl10	0.129076	-0.742	205.54	197.76	372.78	102.27	174.56	181.38
P62264	RS14	Rps14	0.130567	-0.751	173.62	298.87	279.71	242.66	160.73	78.119
Q93092	TALDO	Taldo1	0.128197	-0.466	161.65	199.03	306.55	174.57	115.08	186.39
P26039	TLN1	Tln1	0.129045	-0.648	64.965	178.79	126.54	120.8	50.741	62.291
A6H630	ARMT1	Armt1	0.131317	-0.476	0	1.0372	1.4545	0.79995	0.68082	0
B9EJR8	DAAF5	Dnaaf5	0.131392	-0.595	0	1.2937	2.2007	0	0.64268	0.89504
Q61749	EI2BD	Eif2b4	0.130642	-0.776	5.6554	19.611	12.354	9.2241	3.5025	8.4534
Q60902	EP15R	Eps15l1	0.134187	-0.755	7.8415	6.3259	13.737	3.6825	5.5858	6.8852
Q8K157	GALM	Galm	0.13294	0.877	0	0	0	2.0916	1.8457	0
Q9CXT8	MPPB	Pmpcb	0.132581	-1.38	5.7401	14.024	3.7105	1.3921	1.8246	6.7286
O35654	DPOD2	Pold2	0.134037	-0.799	5.4999	7.7977	8.6323	3.655	6.9156	2.7812
Q925E7	2ABD	Ppp2r2d	0.133936	-0.647	0	2.0844	1.7357	0	0.6976	0.94059
Q3TLH4	PRC2C	Prrc2c	0.131665	-1.21	14.042	8.4844	6.0343	3.9577	1.7008	8.6382
A2AQ25	SKT	Skt	0.133033	-0.517	0.52948	1.3028	1.3646	0	0	0
Q8CH02	SUGP1	Sugp1	0.133571	-0.998	2.8581	1.8529	3.4428	3.4356	0	1.1236
P10711	TCEA1	Tcea1	0.131795	-0.702	25.602	17.62	46.494	15.27	16.252	19.627
Q3URQ0	TEX10	Tex10	0.134219	-0.66	8.0311	5.4505	11.264	4.4537	4.6865	5.9874
Q04750	TOP1	Top1	0.133351	-0.524	11.47	24.969	30.197	14.978	14.487	13.407
P11440	CDK1	Cdk1	0.134658	-0.525	58.785	115.05	120.6	96.733	39.93	70.943
Q8BTU1	CFA20	Cfap20	0.136574	-0.482	3.1497	5.2732	4.4841	3.6741	2.0557	3.6161
P26443	DHE3	Glud1	0.134775	-0.462	185.85	211.56	302.56	176.75	165.8	155.46
P24547	IMDH2	Impdh2	0.137359	-0.598	371.08	331.69	705.9	452.27	186.15	297.9
Q6PGB6	NAA50	Naa50	0.136272	-0.785	6.4854	5.8845	18.066	9.1466	4.0846	3.6054
Q99K01	PDXD1	Pdxdc1	0.138394	-0.539	6.9106	10.442	7.78	5.4491	5.6798	5.9179
Q8CFI7	RPB2	Polr2b	0.134993	-0.516	14.802	21.26	24.995	18.258	14.57	10.107
Q60692	PSB6	Psmb6	0.136764	-0.472	73.173	113.39	90.732	79.681	59.074	59.943
Q9WVJ2	PSD13	Psmd13	0.135578	-1.26	13.321	36.437	40.619	24.832	16.289	3.5146
Q8C1A5	THOP1	Thop1	0.136114	-0.446	21.665	32.288	48.956	26.703	18.652	27.21
Q99LG2	TNPO2	Tnpo2	0.135348	-0.992	1.554	3.4035	0	0	0	1.2175
Q9Z1Q9	SYVC	Vars	0.13549	-0.433	55.028	66.692	104.31	69.875	42.876	51.908
Q91WQ3	SYYC	Yars	0.138208	-0.687	5.0077	17.799	10.841	8.4862	5.5368	4.9242
P68254	1433T	Ywhaq	0.13792	-0.408	56.05	93.619	113.3	74.871	50.763	66.922
Q8JZN5	ACAD9	Acad9	0.140226	-0.688	2.1939	5.587	5.6066	4.5809	1.3528	2.651
B2RQC6	PYR1	Cad	0.14081	-0.609	119.83	256.56	218.27	226.82	84.051	99.205
Q5SW19	CLU	Cluh	0.143087	-0.542	15.372	19.478	23.386	12.326	15.97	11.521
Q01149	CO1A2	Col1a2	0.142369	-1.4	42.628	39.792	26.067	4.7347	14.128	35.73
Q9CQX2	CYB5B	Cyb5b	0.141362	-1.02	7.542	2.5868	5.0956	1.874	1.6398	3.8411
Q8CHW4	EI2BE	Eif2b5	0.143245	-0.617	13.363	21.893	17.66	21.195	7.0776	9.5432
O70378	EMC8	Emc8	0.140875	-0.577	5.4463	11.708	17.432	10.384	5.7799	5.5776
Q8CI11	GNL3	Gnl3	0.142391	-1.04	0.78808	2.0576	6.2101	0.77383	1.1985	1.2537
P59235	NUP43	Nup43	0.139623	1.42	4.9822	0	1.7905	4.0158	4.8988	6.0406
Q9WVE8	PACN2	Pacsin2	0.142124	-0.995	2.9151	9.0532	5.5748	3.3262	1.0345	5.3991
Q7TNL5	Q7TNL5	Ppp2r5d	0.140714	-1	4.6656	3.5061	11.75	6.1821	1.1762	3.3049
P62821	RAB1A	Rab1A	0.140979	-0.754	37.964	84.725	47.401	23.376	28.572	47.626
Q920A5	RISC	Scpep1	0.139497	1.48	0.84477	0	0	9.1297	2.0763	0
P97765	WBP2	Wbp2	0.140333	-0.894	4.5656	3.746	8.509	6.4557	2.3192	1.5145
Q9CQQ7	AT5F1	Atp5f1	0.14456	-0.68	24.118	55.642	28.943	21.042	14.8	30.344
Q9WVG6	CARM1	Carm1	0.143998	0.528	4.4319	4.3221	9.5237	9.5625	6.1665	9.2721
Q5NBX1	COBL	Cobl	0.14693	-0.557	7.2372	9.3342	6.6314	5.2309	4.3774	6.1385
Q922E6	FAKD2	Fastkd2	0.147477	-2.35	4.2098	44.422	0	0	0	2.5773
Q99ME9	GTPB4	Gtpbp4	0.144346	-0.623	0.8724	1.9834	1.4856	0	0	1.3666
Q9QZQ8	H2AY	H2afy	0.147831	1.37	0	3.5807	9.2224	5.4243	10.251	6.2037
P62806	H4	Hist1h4a	0.14678	0.948	233.61	1142.7	1268.6	1132.6	1764.2	1217.1
Q9CX86	ROA0	Hnrnpa0	0.147315	-0.776	19.526	27.266	24.724	21.777	5.7019	21.105
P11438	LAMP1	Lamp1	0.14621	-0.625	8.382	11.543	15.931	6.2751	10.23	6.5518
P14733	LMNB1	Lmnb1	0.145744	-0.633	51.751	116.65	179.14	75.89	75.268	50.729
Q60973	RBBP7	Rbbp7	0.147886	-0.667	88.56	66.085	174.09	55.317	63.205	72.748
P41105	RL28	Rpl28	0.143585	-0.78	196.01	384.19	170.77	130.23	93.29	209.22
O70456	1433S	Sfn	0.148067	-0.428	154.89	281.93	274.25	210.23	122	191.73
Q9QXX4	S2513	Slc25a13	0.146159	1.25	7.1058	2.0067	9.4252	31.078	6.5197	8.8819
Q9EQH3	VPS35	Vps35	0.144169	-0.411	11.439	19.389	21.561	14.216	11.754	12.17
Q3TIV5	ZC3HF	Zc3h15	0.143917	-1.18	5.8443	9.3107	3.7192	2.5586	1.0446	6.4783
P58742	AAAS	Aaas	0.149875	0.756	1.5214	4.7756	3.6278	4.8915	7.114	3.6495
P61222	ABCE1	Abce1	0.151002	-0.554	45.632	104.12	66.479	54.258	31.865	57.786
P22682	CBL	Cbl	0.152021	-0.75	3.2239	9.5399	3.718	3.3041	3.0478	2.3873
Q8CGZ0	CHERP	Cherp	0.149203	-0.973	2.9753	8.6013	3.155	3.4875	0.92321	3.3126
Q9QXB9	DRG2	Drg2	0.149082	1.23	3.8139	0	3.5904	5.4448	5.1091	4.3617
Q8CAQ8	MIC60	Immt	0.148397	-0.452	20.299	33.006	50.068	28.827	21.911	20.76
P97386	DNLI3	Lig3	0.15218	-0.845	2.5993	2.3701	4.6848	0.97631	1.8017	2.8286
P06801	MAOX	Me1	0.151169	-1.09	2.942	15.174	3.0792	4.0936	1.8057	1.911
Q6PIJ4	NFRKB	Nfrkb	0.149932	-0.603	0.58034	1.6824	0	0	0.47963	0.6233
Q3TIU4	PDE12	Pde12	0.150725	-0.954	0.70868	3.4698	3.3319	0	1.5156	0.85648
O88685	PRS6A	Psmc3	0.151781	-0.544	56.138	53.548	67.213	58.654	23.856	46.613
Q8BML9	SYQ	Qars	0.152165	-0.391	24.883	41.559	49.571	34.29	22.238	29.801
Q8BHS3	RBM22	Rbm22	0.152884	-0.541	5.4482	13.288	9.9632	8.1672	5.9824	4.791
P31266	SUH	Rbpj	0.151661	-0.542	14.747	34.38	36.085	28.801	11.671	17.647
Q9D0F6	RFC5	Rfc5	0.150798	-0.431	12.658	14.669	20.366	11.879	9.5554	13.605
P62855	RS26	Rps26	0.150254	-0.892	29.134	105.21	42.698	56.226	19.52	18.672
P11157	RIR2	Rrm2	0.152316	-0.62	28.388	53.862	57.778	52.714	15.061	30.661
P32067	LA	Ssb	0.152173	-0.432	21.378	35.514	46.036	24.532	23.343	24.838
D3Z2H9	D3Z2H9	Tpm3-rs7	0.148395	-0.65	105.31	70.657	100.68	92.736	46.708	44.771
P63028	TCTP	Tpt1	0.149102	-1.11	38.305	20.979	97.56	33.249	7.5887	31.011
Q8R1K1	UBAC2	Ubac2	0.150793	-0.906	1.3548	3.2112	0	0	0	1.1965
P50516	VATA	Atp6v1a	0.154018	-0.549	33.832	46.473	73.086	58.876	24.527	25.385
P50136	ODBA	Bckdha	0.158636	-0.609	0.64918	2.0801	1.1287	0	0	0.83412
Q3U1J4	DDB1	Ddb1	0.154869	-0.631	75.563	194.87	225.94	103.33	118.19	73.373
Q9ESX5	DKC1	Dkc1	0.156197	-0.484	19.066	39.971	40.219	31.939	20.052	17.488
Q8BGY2	IF5A2	Eif5a2	0.15461	-0.914	58.097	26.201	125.31	27.325	28.813	36.223
Q9WUA2	SYFB	Farsb	0.155571	-0.504	65.583	59.238	124.59	73.743	45.116	51.04
P00405	COX2	Mtco2	0.15363	0.933	1.4896	6.2874	1.8586	4.5357	3.624	7.3727
Q9CQH3	NDUB5	Ndufb5	0.155865	-0.409	27.165	50.828	47.654	36.265	26.903	28.81
Q1HFZ0	NSUN2	Nsun2	0.157851	-0.448	56.056	58.762	105.59	54.961	44.546	55.904
Q9DBG5	PLIN3	Plin3	0.15811	-0.398	23.045	31.85	45.987	29.006	22.344	22.759
Q61033	LAP2A	Tmpo	0.158247	-0.465	44.729	44.597	50.715	45.776	24.016	35.02
P61759	PFD3	Vbp1	0.155375	-1.13	6.2996	5.648	10.993	1.3394	4.052	6.9458
P28474	ADHX	Adh5	0.159715	-0.575	18.773	39.432	64.48	30.734	15.452	30.432
P45377	ALD2	Akr1b8	0.161029	-0.431	4.5823	9.5234	8.7646	6.7676	4.8018	4.8052
Q80VC9	CAMP3	Camsap3	0.163104	-1.4	9.6647	13.076	11.216	5.4923	0.93843	15.082
Q8JZM7	CDC73	Cdc73	0.159293	-0.489	8.0127	19.257	14.745	13.123	7.076	8.8588
Q8BI72	CARF	Cdkn2aip	0.161653	-1.33	0.95384	10.674	1.5051	0	0.94947	1.1652
O88271	CFDP1	Cfdp1	0.160528	-0.524	17.389	13.104	20.096	11.93	10.931	11.806
Q922B2	SYDC	Dars	0.160091	-0.386	83.416	123.52	160.71	97.897	79.508	95.328
Q9D892	ITPA	Itpa	0.161147	-0.668	3.0061	11.094	12.03	6.5475	3.7109	4.1198
Q9D1G2	PMVK	Pmvk	0.160175	1.16	1.2037	0	1.7983	1.0421	3.5629	4.5018
Q99K85	SERC	Psat1	0.162457	-0.406	76.764	108.46	157.58	113.7	60.647	81.727
Q8R2U0	SEH1	Seh1l	0.16185	-0.734	1.7116	1.9425	3.265	1.7048	0	2.335
Q9CWK8	SNX2	Snx2	0.161833	-0.484	14.524	21.111	26.233	13.945	16.748	12.589
P09671	SODM	Sod2	0.159278	0.45	7.1632	11.558	10.27	12.488	11.247	15.438
A8C756	THADA	Thada	0.160732	1.18	2.334	0	0	5.776	2.1478	1.4044
Q99KF1	TMED9	Tmed9	0.160063	-1.1	3.4003	3.2287	6.9315	2.7234	0	4.773
Q1PSW8	LIN41	Trim71	0.159769	1.8	6.5743	0	16.864	13.241	19.386	12.567
Q8R317	UBQL1	Ubqln1	0.159763	-0.819	4.2967	11.153	9.5555	7.3024	1.7299	6.6054
Q9WV55	VAPA	Vapa	0.162153	-0.727	23.122	15.752	28.365	16.561	6.6134	20.822
P30285	CDK4	Cdk4	0.163946	-1.15	2.1146	7.3143	5.1635	0.80588	3.7357	2.4033
Q9DAW9	CNN3	Cnn3	0.165725	-0.499	85.586	183.43	145.45	147.01	64.446	85.445
O88543	CSN3	Cops3	0.165122	-1.13	4.8094	2.8216	6.9545	4.058	0	3.7599
Q8VHK9	DHX36	Dhx36	0.165609	-1.41	0.59882	1.665	13.067	0	0.71949	1.1002
Q9D753	EXOS8	Exosc8	0.164625	-0.581	0.63084	0	1.8495	0	0.44385	0
P49717	MCM4	Mcm4	0.165739	-0.444	85.336	76.761	121.51	75.552	59.591	70.195
Q7TMB8	CYFP1	Cyfip1	0.167215	-0.439	5.6018	12.355	10.024	8.4483	5.3401	6.1702
Q9Z0W3	NU160	Nup160	0.167665	-0.75	5.0662	19.856	10.984	11.28	3.7471	5.4972
Q61183	PAPOA	Papola	0.168707	-0.734	0	2.6012	1.3833	0	0.8745	0
Q60676	PPP5	Ppp5c	0.166819	-0.736	7.1081	8.2557	16.151	3.6987	7.6812	7.2129
P61358	RL27	Rpl27	0.168108	-0.388	98.184	111.13	150.09	103.27	80.24	88.194
Q9JKY0	CNOT9	Rqcd1	0.166493	-0.451	7.5707	15.447	12.769	11.969	5.9655	8.1898
P70677	CASP3	Casp3	0.170966	-0.548	21.655	16.408	36.503	19.352	11.034	19.442
Q6P1F6	2ABA	Ppp2r2a	0.170879	-0.506	14.146	29.649	19.683	17.734	9.5002	17.098
O09061	PSB1	Psmb1	0.172222	-1.11	18.475	40.185	90.676	63.713	9.7824	10.825
P70195	PSB7	Psmb7	0.170007	-1.02	17.23	24.053	22.548	23.843	2.954	15.934
Q8C878	UBA3	Uba3	0.171324	-0.848	5.4248	13.149	35.014	12.851	6.438	5.1785
Q60932	VDAC1	Vdac1	0.170091	0.626	23.713	31.884	91.623	76.023	46.013	72.722
P39054	DYN2	Dnm2	0.174893	-0.606	2.9469	6.1227	7.889	6.6597	2.4878	2.4388
Q8QZS1	HIBCH	Hibch	0.172762	-0.784	2.5082	1.0436	1.6089	0.90916	0.98349	0.92182
Q9D967	MGDP1	Mdp1	0.173347	0.908	0	2.7493	4.8073	5.8064	2.454	3.7058
P11103	PARP1	Parp1	0.173106	-0.592	131.03	148.69	281.46	183.26	118.53	73.685
Q99LI5	ZN281	Znf281	0.173369	-0.555	0.90205	1.7962	0	0	0.69597	0.78759
Q501J6	DDX17	Ddx17	0.17842	-0.388	47.492	73.516	103.41	57.596	46.426	60.316
P30681	HMGB2	Hmgb2	0.179276	-0.562	210.34	200.09	474.49	160.87	187.02	206.36
Q9CPY7	AMPL	Lap3	0.178924	-0.418	151.98	168.26	280.31	178.98	101.59	165.3
Q78ZA7	NP1L4	Nap1l4	0.178822	-0.449	8.8787	9.7118	11.94	9.0512	4.7663	9.3833
P60867	RS20	Rps20	0.178838	-0.442	210.03	233.27	442.79	243.47	195.39	182.06
P62305	RUXE	Snrpe	0.17743	-1.6	15.522	13.028	8.6067	0	7.7422	9.2361
Q9WU03	SPIT2	Spint2	0.178199	-0.499	1.0112	1.1968	0.99315	0	0.78573	0
Q8VBT0	TMX1	Tmx1	0.178262	-0.844	1.7162	3.8705	1.6382	1.3873	0	2.2867
Q64514	TPP2	Tpp2	0.177843	-0.721	11.925	13.403	32.558	22.48	7.5156	6.8841
P07356	ANXA2	Anxa2	0.180719	-0.509	7.9902	11.847	17.451	6.6429	8.7572	9.851
Q7TT18	MCAF1	Atf7ip	0.181038	-1.14	5.299	3.4839	5.4181	2.8438	0	5.5823
Q8CFI2	UB2R1	Cdc34	0.179451	0.473	2.7424	4.0875	4.8946	9.1587	3.5249	4.5455
A2A432	CUL4B	Cul4b	0.180888	-0.956	39.909	65.084	38.688	11.973	22.042	52.125
Q99JX4	EIF3M	Eif3m	0.181251	-0.644	2.7066	5.1076	2.292	2.8598	1.2954	2.242
Q8BGD9	IF4B	Eif4b	0.180155	-0.9	86.97	54.589	43.989	23.956	22.267	60.192
Q9R0N0	GALK1	Galk1	0.182224	-0.369	15.103	22.295	28.618	22.477	12.476	15.969
Q61205	PA1B3	Pafah1b3	0.180522	-0.933	2.2739	2.1638	6.7806	0	2.2033	2.5058
O35405	PLD3	Pld3	0.182406	0.468	2.9235	4.5577	3.7923	8.273	3.6864	4.3876
Q3TWW8	SRSF6	Srsf6	0.180643	-0.478	49.87	101.62	69.907	49.478	45.173	58.698
Q6ZQ38	CAND1	Cand1	0.184575	-0.408	58.77	120.3	98.958	87.943	51.88	65.688
O88712	CTBP1	Ctbp1	0.185082	-0.75	1.121	3.1814	3.6315	0	1.6876	1.8587
Q6PGC1	DHX29	Dhx29	0.183133	-0.596	1.7017	4.5686	2.2179	2.5255	1.3453	1.4691
Q61103	REQU	Dpf2	0.183176	1.28	0	6.6913	7.2931	14.304	3.598	8.1494
Q8R1Q8	DC1L1	Dync1li1	0.185828	-0.463	17.93	27.074	18.846	20.414	12.538	13.641
Q9Z1X4	ILF3	Ilf3	0.183985	-0.412	22.663	31.46	50.15	24.586	23.183	26.616
P28667	MRP	Marcksl1	0.183783	-0.922	34.797	26.626	21.152	9.0773	10.361	30.614
Q8K2T8	PAF1	Paf1	0.18513	-0.699	4.0011	2.0088	5.6135	1.9987	2.3913	2.2053
P55258	RAB8A	Rab8a	0.184605	-1.5	3.9803	5.4857	8.2456	11.164	0.38859	1.8341
Q91ZW3	SMCA5	Smarca5	0.183192	-0.758	41.663	91.991	102.5	25.878	64.845	48.37
P61957	SUMO2	Sumo2	0.184803	-0.717	37.106	17.165	21.635	17.927	11.099	15.586
Q8CDN6	TXNL1	Txnl1	0.184521	-0.702	21.062	19.167	37.444	10.373	12.586	26.912
A0A1D5RLD8	A0A1D5RLD8	A0A1D5RLD8	0.18762	0.584	NA	NA	NA	NA	NA	NA
O08749	DLDH	Dld	0.188426	-0.669	29.662	32.469	24.852	32.241	8.8578	20.866
O70318	E41L2	Epb41l2	0.187524	-0.579	7.4206	10.666	5.6781	5.3395	4.7378	5.3259
Q99KB8	GLO2	Hagh	0.188861	-0.743	1.3928	2.0508	1.9868	0	0	2.3497
G3UYU0	G3UYU0	Mex3a	0.187491	-0.431	0.70152	1.049	0	0	0.62665	0.5148
Q7TSV4	PGM2	Pgm2	0.187097	-0.453	1.0744	2.5732	2.1293	1.4327	0.99896	1.6035
Q9JIG8	PRAF2	Praf2	0.187215	1.04	2.7897	0	4.5617	5.114	3.9406	3.7694
Q8BK67	RCC2	Rcc2	0.188946	-0.598	114.85	127.75	398.01	161.43	94.092	110.95
P68510	1433F	Ywhah	0.188825	-0.488	100.88	173.33	209.13	196.52	73.549	91.718
Q8VDW0	DX39A	Ddx39a	0.192782	-0.986	22.081	24.936	21.231	39.682	6.3165	6.0035
Q62188	DPYL3	Dpysl3	0.191735	-1.26	5.3427	10.67	4.1246	7.2744	0	3.9837
Q91Z49	UIF	Fyttd1	0.190705	0.363	0.85679	1.43	1.3947	1.69	1.281	1.6781
P49312	ROA1	Hnrnpa1	0.192911	-0.903	215.52	154.35	313.26	59.541	110.05	243.46
P18155	MTDC	Mthfd2	0.193973	-1.56	2.0131	28.824	17.901	12.944	1.0166	3.0523
Q8VBW6	ULA1	Nae1	0.193619	-0.414	13.155	14.813	21.732	12.603	9.0784	15.657
Q9WV84	NDKM	Nme4	0.191799	0.466	0	0.78762	0	0	1.0988	1.2259
P27773	PDIA3	Pdia3	0.192711	-0.376	349.61	468.47	759.31	488.08	320.95	362.87
P07742	RIR1	Rrm1	0.193113	-0.975	13.895	3.6785	13.684	4.0075	5.9929	3.8375
Q689Z5	SBNO1	Sbno1	0.193984	-0.474	0.81577	0	1.5307	0	0	0
G5E870	TRIPC	Trip12	0.192651	-0.422	22.541	37.259	36.607	24.423	25.641	20.415
Q8BK64	AHSA1	Ahsa1	0.194389	-0.429	25.151	36.304	28.877	30.874	15.589	22.453
Q8VCN5	CGL	Cth	0.195839	-0.368	82.344	96.681	129.4	97.025	56.602	87.312
Q9JKA5	GPA33	Gpa33	0.194703	-0.593	1.1669	0	1.8679	0	0.56662	0.88887
Q3TC46	PATL1	Patl1	0.197066	-0.468	0.87519	1.2037	1.6888	0	0	1.3053
Q99JF8	PSIP1	Psip1	0.194219	-1.02	24.711	8.6442	39.497	5.8954	13.619	12.485
P14206	RSSA	Rpsa	0.196619	-0.563	543.52	778.17	1709.6	1060.5	401.84	525.77
P08228	SODC	Sod1	0.198067	-0.449	121.69	104.01	159.28	98.355	70.081	115.03
Q80X50	UBP2L	Ubap2l	0.196851	-0.746	23.693	50.303	29.135	45.373	14.008	11.581
Q60930	VDAC2	Vdac2	0.194802	0.397	17.282	36.495	42.308	44.781	34.963	38.878
Q3UPF5	ZCCHV	Zc3hav1	0.196441	-0.691	3.9245	7.2258	5.097	4.3396	4.5299	1.7488
Q61656	DDX5	Ddx5	0.198686	-0.362	348.6	642.51	613.78	491.93	306.45	429.44
O55111	DSG2	Dsg2	0.201895	-0.499	1.7734	3.4175	5.5947	2.271	2.5531	2.0723
Q7TNL7	Q7TNL7	Dusp9	0.19909	-0.531	6.8274	8.0896	5.6159	4.738	4.9761	4.357
P68040	RACK1	Gnb2l1	0.20004	-0.457	96.799	180.55	321.6	162.06	108.41	123.67
Q99JX3	GORS2	Gorasp2	0.201434	-0.448	1.734	2.4402	1.9358	2.2728	1.0914	1.2999
Q3UHX2	HAP28	Pdap1	0.199928	-0.766	7.946	2.9664	6.7538	3.9514	1.9364	4.232
P52432	RPAC1	Polr1c	0.198631	-0.657	4.0829	14.437	9.1747	4.1982	6.3226	5.1995
Q8C2Q3	RBM14	Rbm14	0.201712	-0.455	39.962	43.32	47.246	27.836	31.814	35.86
Q9JIM1	S29A1	Slc29a1	0.199419	-0.377	5.6015	8.2557	9.9568	8.459	5.066	4.9082
Q9Z1F9	SAE2	Uba2	0.201876	-0.506	57.034	70.82	176.57	65.296	53.82	70.815
P62960	YBOX1	Ybx1	0.199293	-0.386	14.578	16.163	23.839	19.129	11.084	11.881
Q8CAY6	THIC	Acat2	0.204589	-0.417	10.701	14.755	29.053	14.981	10.269	12.524
Q8CJ40	CROCC	Crocc	0.205397	0.556	24.693	14.192	31.198	33.806	29.689	34.641
P35550	FBRL	Fbl	0.203219	-0.621	21.277	34.703	27.38	12.296	15.235	29.65
Q8R2Y2	MUC18	Mcam	0.204604	0.418	3.6834	8.1922	6.5317	8.1236	7.4383	7.7735
Q7TNP2	2AAB	Ppp2r1b	0.203598	-1.15	0	5.577	3.4015	2.8293	0	0
Q9DBC7	KAP0	Prkar1a	0.203835	-0.411	3.0333	6.029	4.6575	3.8773	2.3953	3.9009
Q8R3F9	STPAP	Tut1	0.206115	-0.666	1.0133	4.5027	2.5889	2.3495	0.99949	1.2592
Q01853	TERA	Vcp	0.203412	-0.38	506.38	515.75	872.3	578.78	389.93	457.6
Q8CG76	ARK72	Akr7a2	0.209916	-2.4	0	99.658	1.8773	0.96175	0.55583	1.4322
P49025	CTRO	Cit	0.210681	1.63	0.68758	15.087	27.147	34.803	10.341	23.297
Q9CWS4	INT11	Cpsf3l	0.208576	-0.666	1.162	3.3138	2.2016	2.3209	0	1.5428
Q9R0P5	DEST	Dstn	0.210465	-0.705	27.555	99.989	170.87	69.398	32.661	47.921
Q3THW5	H2AV	H2afv	0.209248	1.44	0	4.5495	9.5532	3.3335	17.181	9.1244
Q99LB6	MAT2B	Mat2b	0.207966	0.631	14.479	7.4414	23.33	25.888	15.396	23.447
Q60597	ODO1	Ogdh	0.207784	-0.441	3.8687	3.5395	4.364	3.0044	2.1762	3.6561
P53994	RAB2A	Rab2a	0.210561	0.713	3.2707	2.0541	5.4708	9.1056	2.4945	7.1326
P46467	VPS4B	Vps4b	0.207529	0.981	9.6084	2.1919	12.563	12.764	11.806	13.515
Q9CWT6	DDX28	Ddx28	0.213703	1.07	1.5542	0	0	0	3.1551	3.365
Q8BMJ3	IF1AX	Eif1ax	0.215347	-0.379	22.657	23.359	40.278	28.161	17.435	19.762
P54071	IDHP	Idh2	0.211666	-0.442	26.018	55.082	78.088	51.745	25.702	33.553
Q9R190	MTA2	Mta2	0.213485	-0.429	19.428	37.986	37.058	22.545	16.002	31.044
G3X9Z4	PCF11	Pcf11	0.211047	-0.651	1.5387	2.0873	0	0	0.88925	1.0015
Q9EQ61	PESC	Pes1	0.213039	-0.393	7.2369	15.28	11.627	10.719	6.588	8.0445
P53811	PIPNB	Pitpnb	0.21389	-0.692	1.2063	0	2.8807	0	0.84868	0.76957
Q8BYK6	YTHD3	Ythdf3	0.211012	-0.72	7.6376	34.005	15.081	16.183	5.4995	9.8391
Q91VY9	ZN622	Znf622	0.212088	-0.677	0.92074	2.7804	0	0.98561	0	0.99967
Q99NH0	ANR17	Ankrd17	0.216987	-0.699	6.2597	7.4934	6.3164	9.752	3.069	2.3141
Q91VC3	IF4A3	Eif4a3	0.216101	-0.539	32.124	105.12	93.519	43.323	39.403	60.26
P17182	ENOA	Eno1	0.215601	-0.462	2071.7	4236.4	5412	4439.7	1853.7	2206.5
Q6P6L6	Q6P6L6	Gemin4	0.219961	-0.336	0.66112	0.9379	1.1531	0	0.65634	0
Q8BWU5	OSGEP	Osgep	0.216563	-0.439	4.846	8.6485	13.227	7.331	6.3581	4.7767
Q9DCC4	P5CR3	Pycrl	0.217913	-0.371	6.5089	10.922	10.2	6.9701	5.7422	8.3697
Q9JMA2	TGT	Qtrt1	0.215864	-0.429	9.8083	12.933	9.8317	8.2994	6.7252	9.1532
P62492	RB11A	Rab11a	0.220289	-0.391	17.387	34.753	27.042	23.407	13.9	22.268
P05480	SRC	Src	0.219485	0.711	11.914	7.3712	5.5747	20.271	8.0983	13.087
Q9QZM0	UBQL2	Ubqln2	0.220147	-0.515	16.801	15.247	19.817	18.773	11.861	7.8076
Q9ESV0	DDX24	Ddx24	0.22331	-1.06	1.5764	5.4294	0	0	1.5902	0.64206
Q3UW53	NIBA1	Fam129a	0.221691	0.92	0	0	4.084	1.6176	2.4255	2.9359
Q80YQ2	MED23	Med23	0.221868	-0.352	0.73021	0.98149	0	0	0	0
Q64674	SPEE	Srm	0.224676	0.939	51.438	14.621	109.14	94.85	70.283	86.779
Q08943	SSRP1	Ssrp1	0.220654	-0.504	16.63	26.757	63.413	28.532	17.379	19.952
Q8C6P8	ZFP57	Zfp57	0.224692	-0.504	13.554	23.525	12.28	13.016	8.2116	12.837
Q91V92	ACLY	Acly	0.228316	-0.466	83.372	246.25	209.03	172.13	92.078	102.78
P50518	VATE1	Atp6v1e1	0.227216	-0.447	14.251	18.664	17.932	17.731	6.9604	15.261
Q9Z2X1	HNRPF	Hnrnpf	0.226195	-0.362	131.53	234.53	201.86	197.7	115.89	128.04
P01863	GCAA	Ighg	0.229986	0.894	2.2025	0	4.5097	3.4764	2.7625	4.5694
P24527	LKHA4	Lta4h	0.23023	-1.08	2.2059	18.723	7.9829	6.7013	1.0929	4.7995
P49718	MCM5	Mcm5	0.228339	-0.37	101.95	199.46	238.53	139.53	102.63	156.93
Q9Z120	TRMB	Mettl1	0.228668	-0.648	0.93011	0	2.5907	0.78312	0.88412	0
Q6GQT9	NOMO1	Nomo1	0.228366	0.445	7.4223	14.163	14.218	27.599	10.331	13.232
Q3UEB3	PUF60	Puf60	0.229492	-0.848	17.721	70.184	69.413	62.641	9.9725	23.685
P60122	RUVB1	Ruvbl1	0.225794	-0.388	103.82	189.69	253.36	195.12	100.05	114.13
O70475	UGDH	Ugdh	0.227725	-0.397	4.0926	7.5351	5.6165	6.0953	3.0989	4.0168
Q8CBW3	ABI1	Abi1	0.233264	0.707	2.2665	1.6334	1.472	1.8715	3.6466	3.4719
Q9Z103	ADNP	Adnp	0.235124	-0.627	4.7218	6.5017	4.9608	7.9476	2.3468	2.2176
O35381	AN32A	Anp32a	0.234206	-0.442	46.359	75.517	89.043	45.675	35.635	76.413
O08579	EMD	Emd	0.234135	-0.324	7.3232	11.673	12.38	10.264	5.912	8.882
O09131	GSTO1	Gsto1	0.231554	0.474	27.655	25.365	67.407	67.495	40.823	45.99
O88477	IF2B1	Igf2bp1	0.232529	-0.442	186.67	315.42	455.11	348.82	127.16	240.82
Q60603	KCNH1	Kcnh1	0.233099	1.18	0	0	8.2899	2.9771	4.1318	3.263
P08249	MDHM	Mdh2	0.233036	-0.391	268.14	444.85	787.54	394.92	301.12	350.16
P37040	NCPR	Por	0.235013	1.18	4.9803	0	7.1253	9.498	5.9835	5.0074
Q5SFM8	RBM27	Rbm27	0.232218	1.13	3.0553	0	7.3338	5.115	7.577	4.21
Q91VI7	RINI	Rnh1	0.230896	-0.751	1.885	9.6525	12.891	3.5871	3.0494	4.495
P57784	RU2A	Snrpa1	0.23354	-0.471	15.317	44.071	50.727	32.885	16.715	23.371
Q8CB77	ELOA1	Tceb3	0.234617	-0.583	0	2.4047	1.7137	1.0022	0	1.2493
Q9EPU0	RENT1	Upf1	0.234211	-0.334	80.459	107.01	137.79	94.696	82.31	75.992
Q5SSI6	UTP18	Utp18	0.231096	-0.969	0	3.3844	4.4731	0	0	2.3714
Q5SWU9	ACACA	Acaca	0.235916	-0.498	5.2383	4.3442	6.7647	6.1887	3.4579	2.5558
Q920A7	AFG31	Afg3l1	0.238185	0.951	2.6762	0	1.215	1.6263	2.5628	3.8848
P17426	AP2A1	Ap2a1	0.236196	-0.911	2.0557	2.6816	4.6485	0.6145	2.7127	2.3105
Q9R069	BCAM	Bcam	0.240329	-0.397	14.046	19.656	35.725	17.503	16.832	14.663
Q9JLQ0	CD2AP	Cd2ap	0.235714	1.25	7.126	0	5.9424	6.8473	6.7359	8.5429
Q9D824	FIP1	Fip1l1	0.238613	-0.603	1.3059	0	2.3637	0	0.76354	0.91559
Q6PCM1	KDM3A	Kdm3a	0.237713	-0.673	1.1958	5.5271	6.2545	2.4823	1.4221	2.8881
Q6URW6	MYH14	Myh14	0.237174	0.966	4.2103	1.2025	10.386	10.758	5.9099	6.1603
P35486	ODPA	Pdha1	0.238685	-0.398	15.078	28.065	33.732	22.328	19.714	14.177
Q99MV7	RNF17	Rnf17	0.240494	-0.75	0.77945	4.0699	1.1743	1.275	0	1.0351
P62900	RL31	Rpl31	0.237534	-0.496	125.03	140.67	106	75.443	89.724	98.185
P51410	RL9	Rpl9	0.235796	-0.668	72.224	235.31	172.57	206.33	56.049	63.184
P63325	RS10	Rps10	0.238728	-0.651	57.913	31.871	98.393	31.255	26.706	56.176
Q62419	SH3G1	Sh3gl1	0.241067	-0.625	7.8129	13.477	20.883	13.761	10.314	4.2272
Q9R099	TBL2	Tbl2	0.236634	-0.55	1.6069	2.183	1.6409	0	1.3211	1.599
Q8K2K6	AGFG1	Agfg1	0.243976	-0.79	6.6815	11.241	4.1463	8.0152	3.6	2.0883
P97384	ANX11	Anxa11	0.244587	-0.682	5.5617	6.433	17.152	12.717	3.0818	3.7892
P08030	APT	Aprt	0.245632	-0.508	0	1.8086	1.6281	0	1.0276	0.69501
P28659	CELF1	Celf1	0.246304	-0.333	9.2401	17.922	20.451	13.408	9.5251	13.275
P61202	CSN2	Cops2	0.243939	-0.968	1.2504	1.2166	5.9986	0	2.2495	0
O08553	DPYL2	Dpysl2	0.246359	-0.439	17.491	14.405	27.403	12.72	13.449	16.194
Q9CQ43	DUT	Dut	0.241714	-0.492	32.929	58.309	65.254	28.168	27.58	57.972
P51807	DYLT1	Dynlt1	0.246511	-0.353	0	1.314	1.14	0	0	0.84468
P39749	FEN1	Fen1	0.24643	-0.525	15.741	9.1585	23.934	11.267	8.105	12.688
Q3U0V1	FUBP2	Khsrp	0.24476	-0.463	282.37	219.15	256.32	171.51	162.32	217.5
Q922S8	KIF2C	Kif2c	0.246479	-0.603	11.528	9.3474	6.4666	5.1878	4.9858	7.6923
Q80WJ7	LYRIC	Mtdh	0.242088	-0.659	0	1.0256	2.8708	0.69551	1.0426	0
P28660	NCKP1	Nckap1	0.243794	-1.63	17.339	22.419	20.847	0	16.183	19.421
O09130	NF2IP	Nfatc2ip	0.246029	-0.487	3.3069	3.572	5.6439	3.9058	1.4829	4.1836
P97372	PSME2	Psme2	0.243765	0.405	0	0.86112	0	0	1.0999	1.1816
P63001	RAC1	Rac1	0.245937	-0.605	5.1734	7.0524	23.512	6.3657	6.8779	5.5681
Q9QUI0	RHOA	Rhoa	0.246521	-0.552	7.3928	14.926	32.927	9.583	11.527	10.437
Q02053	UBA1	Uba1	0.246261	-0.503	330.38	707.91	988.79	778.16	244.03	427.98
Q61464	ZN638	Znf638	0.245066	-0.673	1.6495	2.3199	0	0	1.1576	0.87518
P42209	2025-09-01	2025-09-01	0.24811	-0.431	3.7235	3.2537	6.1316	2.7914	2.9585	3.6719
Q9R0Y5	KAD1	Ak1	0.250919	0.371	0	0	1.1739	1.0546	1.062	0.94445
Q8C0D5	EFL1	Eftud1	0.249209	-0.84	3.3015	5.3406	1.9492	2.6381	0.69841	3.2506
Q91VA7	Q91VA7	Idh3b	0.250033	-0.582	1.3703	1.1233	4.226	1.3427	0.92143	1.5678
P03930	ATP8	Mtatp8	0.249643	1.4	8.6811	0	13.715	13.439	9.7058	11.577
Q8BJ71	NUP93	Nup93	0.248078	-0.341	38.116	43.794	59.3	49.06	32.718	30.321
Q8R326	PSPC1	Pspc1	0.251618	-0.477	5.6491	5.4058	15.15	7.9659	4.2073	5.1231
P35293	RAB18	Rab18	0.248372	-0.388	8.2861	7.1217	9.6699	6.5121	5.7459	6.8094
O88796	RPP30	Rpp30	0.248674	1.07	1.5705	0	0	5.0992	0.52263	3.4664
Q8R010	AIMP2	Aimp2	0.255643	-0.694	9.0108	16.992	5.111	9.1277	4.1279	4.9048
Q8CFQ3	AQR	Aqr	0.256863	-0.431	3.1806	4.3245	3.2686	3.6142	2.6098	1.9439
Q9JKW0	AR6P1	Arl6ip1	0.256542	-0.962	1.3559	0	5.911	0	1.3803	0
Q8BTT6	UTP25	Diexf	0.258231	-0.394	1.1705	1.9749	1.7198	1.8275	1.0906	0.87983
P42125	ECI1	Eci1	0.255685	-0.397	9.2729	17.131	23.742	15.435	7.2699	14.734
Q9JHI7	EXOS9	Exosc9	0.25821	-0.421	7.2251	5.0976	10.597	6.4018	4.4847	5.661
F6YVP7	F6YVP7	Gm10260	0.257844	-0.378	345.94	514.79	800.54	423.06	443.29	346.62
P62313	LSM6	Lsm6	0.255606	-0.369	1.9861	3.0519	2.1928	2.3023	1.4472	1.8518
Q8BWZ3	NAA25	Naa25	0.254187	-0.463	2.4574	1.571	2.4491	1.5806	1.2994	1.7573
P70670	NACAM	Naca	0.257599	-0.414	82.868	73.833	136.87	73.068	51.038	94.925
P32020	SCP2	Scp2	0.253682	-0.3	4.891	6.5714	8.6032	6.8916	4.1425	5.1854
Q9D710	TMX2	Tmx2	0.255211	1.27	5.1633	0	7.7356	12.228	2.6603	11.955
Q8VCW8	ACSF2	Acsf2	0.264172	0.762	2.1824	0	3.4127	4.3961	1.9365	2.9363
Q9WUL7	ARL3	Arl3	0.260497	1.29	8.0148	0	9.8549	9.3395	8.8913	9.495
P10126	EF1A1	Eef1a1	0.262264	-0.508	4626.8	11547	7454.1	9843.1	3378.7	4164
Q99L45	IF2B	Eif2s2	0.265465	-0.416	21.671	58.44	35.141	31.114	21.233	28.364
Q8BFZ9	ERLN2	Erlin2	0.263417	-0.337	5.2734	6.0552	7.3854	6.7404	3.2801	5.2966
Q71FD7	FBLI1	Fblim1	0.264896	-0.692	5.7555	6.8088	4.0093	7.5162	1.4664	3.3787
P28798	GRN	Grn	0.259958	-0.744	17.73	38.273	129.79	32.64	32.303	17.788
Q8BP47	SYNC	Nars	0.26037	-0.566	23.964	36.435	76.62	21.186	20.524	47.401
P09103	PDIA1	P4hb	0.263873	-0.403	270.56	251.62	414.21	245.04	156.79	317.45
Q3UIL6	PKHA7	Plekha7	0.26113	-0.727	3.3751	3.9373	3.9102	1.0691	2.9629	3.6197
Q9CPS7	PNO1	Pno1	0.260167	-0.629	1.6243	0.80493	2.874	0	1.0436	1.1221
O35295	PURB	Purb	0.264711	-0.377	1.3764	1.2171	2.2892	1.2826	0.95654	1.4265
Q9CR57	RL14	Rpl14	0.262737	-0.395	212.42	469.97	508.46	450.52	190.44	260.27
P62751	RL23A	Rpl23a	0.262455	-0.378	290.08	248.98	380.09	231.91	202.83	266.04
P26638	SYSC	Sars	0.264815	-0.505	19.789	14.709	47.105	17.635	15.667	17.38
Q921M3	SF3B3	Sf3b3	0.260492	-0.314	69.126	107.24	155.75	96.777	75.754	81.979
P47226	TES	Tes	0.25935	-0.658	2.3631	2.626	1.7633	2.6272	0	1.7885
O55137	ACOT1	Acot1	0.268812	-0.468	14.666	21.221	13.567	10.565	9.2234	16.368
Q8CJF7	ELYS	Ahctf1	0.271204	-0.707	2.9263	3.3409	1.6217	1.0044	2.1194	1.7131
P19783	COX41	Cox4i1	0.271505	-0.456	8.6435	18.004	8.9556	10.837	5.8122	8.5774
Q8C9B9	DIDO1	Dido1	0.270202	-0.505	5.267	7.6312	4.0946	5.4079	3.723	2.8573
P63158	HMGB1	Hmgb1	0.268163	-0.905	54.674	22.811	82.737	11.521	29.402	46.411
Q9JHU9	INO1	Isyna1	0.271817	-0.357	57.183	53.083	60.118	56.001	37.827	41.019
Q63844	MK03	Mapk3	0.266944	0.402	6.917	9.2523	7.7557	14.721	6.2707	12.406
Q9CWZ7	SNAG	Napg	0.271888	-0.404	0	1.4856	1.1235	1.1782	0	0
Q9R1J0	NSDHL	Nsdhl	0.268947	-0.687	1.1763	2.8523	3.5396	2.336	1.9556	0
P29341	PABP1	Pabpc1	0.265813	-0.433	475.99	341.32	785.6	403.14	348.6	368.98
Q9CQF9	PCYOX	Pcyox1	0.271884	-1.74	26.257	22.456	3.7601	3.5464	0.66073	25.47
Q61074	PPM1G	Ppm1g	0.270217	-0.738	40.545	29.568	81.131	23.729	13.582	65.024
Q76MZ3	2AAA	Ppp2r1a	0.270717	-0.482	61.911	126.85	161.72	147.13	41.748	75.842
Q6PAQ4	REXO4	Rexo4	0.267509	0.475	1.5744	2.4177	2.869	5.75	2.7235	1.8717
P62754	RS6	Rps6	0.26703	-0.391	109.17	119.77	154.25	81.848	101.91	107.26
Q8R0X7	SGPL1	Sgpl1	0.26576	-0.708	2.5654	1.6372	4.0254	2.8268	0	2.313
Q9WUM5	SUCA	Suclg1	0.271006	-0.399	17.228	32.153	45.802	19.998	18.549	29.841
Q9CX34	SGT1	Sugt1	0.271359	-0.387	39.606	65.521	77.604	76.963	34.557	33.893
O88286	WIZ	Wiz	0.266408	-0.44	1.2385	2.6181	1.405	1.3062	1.1808	1.1838
Q9JII6	AK1A1	Akr1a1	0.276665	-0.315	43.267	56.698	87.468	67.975	35.961	45.585
P10518	HEM2	Alad	0.274378	-0.302	2.8445	3.4713	4.4327	2.9979	2.4179	3.2235
Q60759	GCDH	Gcdh	0.277101	0.74	8.5355	2.3917	11.23	11.516	8.4931	10.919
Q99M31	HSP7E	Hspa14	0.278129	-0.595	4.8511	11.44	19.464	14.114	3.3758	6.5807
Q7TQK1	INT7	Ints7	0.274684	-1.06	35.855	27.162	10.218	5.959	6.0722	30.192
Q8VCF0	MAVS	Mavs	0.277765	-0.438	1.2598	1.7649	1.6143	0	1.3273	1.2533
O35682	MYADM	Myadm	0.276612	-0.327	4.0804	5.7624	6.3315	5.1478	4.3004	3.4075
Q8CGC6	RBM28	Rbm28	0.274357	-0.847	1.6789	3.6512	4.8228	0.93779	4.287	1.2638
P62830	RL23	Rpl23	0.273406	-0.421	55.249	131.29	164.2	126.69	62.02	63.142
Q80U70	SUZ12	Suz12	0.274922	-0.338	6.8645	14.3	12.343	9.5878	6.2294	10.046
P60710	ACTB	Actb	0.281088	-0.334	6359	10796	14322	12021	5657.6	7215.9
Q64152	BTF3	Btf3	0.283386	-1.58	17.791	5.8589	86.789	41.798	1.2153	6.6858
P31786	ACBP	Dbi	0.281204	0.479	7.0356	3.958	5.6388	8.829	5.7066	8.4424
Q6P6L0	FIL1L	Filip1l	0.28033	0.558	464.19	234.14	681.74	576.97	680.67	602.07
Q8CHY6	P66A	Gatad2a	0.284831	-0.317	29.082	41.148	34.5	35.16	22.31	27.239
Q9CPN8	IF2B3	Igf2bp3	0.279038	-0.291	25.487	42.62	55.712	38.346	25.92	33.246
B2RXT3	B2RXT3	Ogdhl	0.279091	0.883	14.494	2.6843	12.219	12.354	13.467	17.929
Q61753	SERA	Phgdh	0.279448	-0.307	136.95	232.91	215.79	179.67	145.53	138.89
P36993	PPM1B	Ppm1b	0.282584	-0.325	11.155	19.153	15.605	13.106	9.2469	13.997
Q60710	SAMH1	Samhd1	0.279376	-0.513	2.7761	4.6806	2.0968	2.5281	2.112	1.7577
J3QMS2	J3QMS2	1700014D04Rik	0.288985	0.971	4.6906	0	5.515	6.7134	3.6642	5.4518
P60766	CDC42	Cdc42	0.290633	-0.588	5.9074	13.35	20.707	4.7502	9.6173	10.53
P67871	CSK2B	Csnk2b	0.287843	-0.537	0	1.371	2.7243	0.88421	0	1.412
Q8R0W0	EPIPL	Eppk1	0.285883	1.43	0	0	6.3227	0	10.071	5.8974
Q9QYY0	GAB1	Gab1	0.290912	-0.429	10.81	8.7133	15.573	13.52	7.4483	5.9753
O09172	GSH0	Gclm	0.285052	-0.354	3.0651	5.3023	6.0112	5.4582	3.2252	2.6608
P47791	GSHR	Gsr	0.289657	-0.312	51.305	55.689	80.515	55.683	48.455	44.529
Q3SXD3	HDDC2	Hddc2	0.286233	0.428	1.1119	0	1.4796	1.708	1.1556	1.3976
Q8BG05	ROA3	Hnrnpa3	0.28514	-0.488	30.68	27.261	89.087	32.443	22.722	36.622
A0A140T8M9	A0A140T8M9	Igkv1-110	0.286576	0.548	0.78227	0.55608	0.58873	0	0	1.5533
Q9D6T0	NOSIP	Nosip	0.289053	-0.457	0.93639	0	1.7852	0	0.82221	0
Q8BH04	PCKGM	Pck2	0.288472	0.816	3.5277	2.1939	19.095	13.815	6.6848	8.733
Q9WUA3	PFKAP	Pfkp	0.285977	-0.374	17.813	30.518	51.815	35	18.919	19.551
Q80UW8	RPAB1	Polr2e	0.288685	-0.705	1.3789	2.763	7.6349	2.1992	0.85493	3.5682
O55100	SNG1	Syngr1	0.290301	-0.471	0.59153	0	2.1445	0	0.60543	0
Q9DCC8	TOM20	Tomm20	0.285745	0.905	0	7.2456	5.8351	7.6912	4.2433	5.1459
Q922Y1	UBXN1	Ubxn1	0.287642	0.414	8.6318	6.9996	8.6692	13.412	6.7298	13.72
Q924C1	XPO5	Xpo5	0.28925	-0.543	3.5501	13.885	9.4436	9.6787	3.9321	3.9583
Q60749	KHDR1	Khdrbs1	0.292408	-0.317	25.314	33.405	30.703	31.761	16.807	25.168
P97823	LYPA1	Lypla1	0.291585	0.395	7.8864	13.051	7.5605	13.933	10.591	11.98
Q792Z1	Q792Z1	Try10	0.293234	1.12	16.664	1.5577	16.497	16.947	13.446	19.467
P97930	KTHY	Dtymk	0.295691	-0.46	5.0343	6.9366	13.023	4.3343	7.1574	5.6356
Q6PGG6	GNL3L	Gnl3l	0.296475	-0.758	1.5008	0	4.0457	0	0	1.6793
P51660	DHB4	Hsd17b4	0.297553	-0.367	15.643	41.774	40.667	31.602	16.436	23.872
Q8K3Z9	PO121	Pom121	0.298407	-0.531	0.90698	2.3766	1.1231	0	1.2338	0.74836
Q64727	VINC	Vcl	0.295478	-0.331	35.777	72.46	72.632	59.592	43.651	36.373
Q02257	PLAK	Jup	0.301686	-0.297	8.7918	10.831	13.324	9.0006	8.7426	8.6913
P31938	MP2K1	Map2k1	0.299511	1.29	0	0	15.339	9.3941	3.5273	2.8164
Q6ZQH8	NU188	Nup188	0.299432	-0.706	1.2843	3.7899	0	1.9375	0.65699	0.82195
Q8K2X3	STN1	Obfc1	0.299104	-0.487	1.655	1.5016	1.1209	1.5374	0	1.1098
Q8VE62	PAIP1	Paip1	0.299172	-0.69	0	3.171	3.7708	0	1.2889	1.5407
A0A286YCV9	A0A286YCV9	A0A286YCV9	0.302665	-1.81	NA	NA	NA	NA	NA	NA
Q8K268	ABCF3	Abcf3	0.303838	1.13	6.7613	0	0	3.7926	3.1445	3.8001
Q9R0X4	ACOT9	Acot9	0.305542	0.663	2.2723	0	2.7459	2.7092	1.9932	3.1616
A6PWV5	ARI3C	Arid3c	0.302576	0.867	0	2.4115	0	3.0494	0	4.5667
O09159	MA2B1	Man2b1	0.305545	0.692	4.1829	1.5613	2.2557	5.5952	4.7978	2.312
Q9CQI7	RU2B	Snrpb2	0.304202	-1.47	4.4668	16.134	0	0	0	6.1282
O70492	SNX3	Snx3	0.303111	-0.35	11.116	28.563	27.656	17.425	15.498	15.691
Q99JB2	STML2	Stoml2	0.304333	-0.414	12.252	15.595	11.889	9.8039	6.7634	14.475
O08759	UBE3A	Ube3a	0.303744	0.348	2.0405	4.712	3.5264	4.3899	4.1093	3.8736
Q8QZT1	THIL	Acat1	0.309675	0.472	4.6253	4.3134	12.844	13.5	5.2102	9.7178
Q8R146	ACPH	Apeh	0.307063	-0.598	0	3.0671	2.3566	1.3788	0	1.5435
Q8VDN2	AT1A1	Atp1a1	0.307852	-0.268	132.46	186.6	222.04	184.76	107.43	158.24
Q921I2	KLDC4	Klhdc4	0.307031	-0.266	3.7028	4.8351	5.3653	4.5309	3.1844	3.8316
Q8CES0	NAA30	Naa30	0.306557	-0.709	0	3.0755	3.5682	1.654	1.4748	0
P51432	PLCB3	Plcb3	0.30971	-0.474	3.8019	4.2482	5.3989	6.274	2.8395	1.8284
P51150	RAB7A	Rab7a	0.308959	-0.519	78.542	114.45	182.92	193.28	42.085	68.666
P14576	SRP54	Srp54	0.30721	-0.772	6.2902	3.8875	10.09	8.1193	1.1022	5.5392
Q9WVA4	TAGL2	Tagln2	0.307415	0.348	32.876	34.809	75.234	60.999	52.914	54.982
P39447	ZO1	Tjp1	0.307071	-0.474	3.2774	10.369	5.598	5.193	4.5236	3.0253
P42208	2025-09-02	2025-09-02	0.313531	-0.531	7.5899	24.94	26.413	22.314	5.9492	12.484
Q9EQ80	NIF3L	Nif3l1	0.312807	-0.36	1.3254	2.6374	4.4591	2.4977	1.4042	2.1009
Q9WU78	PDC6I	Pdcd6ip	0.310807	-0.399	10.703	22.507	31.181	25.071	11.864	11.024
D3YXK2	SAFB1	Safb	0.310907	-0.572	8.3441	3.27	9.9612	4.0813	4.3203	4.6961
Q9Z1T1	AP3B1	Ap3b1	0.318458	-0.594	0	2.7857	2.412	1.5969	1.188	0
Q7TNV0	DEK	Dek	0.316858	-0.447	17.83	18.596	53.665	16.997	17.874	23.111
Q9QYJ3	DNJB1	Dnajb1	0.31495	-0.399	2.2815	7.1104	5.2327	4.9294	2.6228	2.8626
Q9Z1N2	ORC1	Orc1	0.316546	0.839	3.4368	0.58042	1.4361	3.9924	2.0947	1.9606
O70591	PFD2	Pfdn2	0.317259	0.784	12.571	2.5044	11.788	15.788	7.792	15.402
Q9CZN7	GLYM	Shmt2	0.317423	-0.294	157	236.86	276.73	271.33	133.04	154.66
Q6ZPJ3	UBE2O	Ube2o	0.316256	-0.539	0	0.52286	1.8035	0	0	0.36117
Q3U2I3	FHI1B	Fam160a2	0.321272	-0.425	1.0489	1.3092	0	0	0.98157	0.621
Q61881	MCM7	Mcm7	0.318953	-0.296	138.37	140.35	221.3	167.86	118.13	117.23
Q6DFW4	NOP58	Nop58	0.320514	-0.392	10.733	17.913	35.604	13.454	15.335	14.689
Q9D0M1	KPRA	Prpsap1	0.321433	-0.812	0	4.5275	5.1644	0	1.3758	2.1889
P34022	RANG	Ranbp1	0.320268	-0.299	41.332	42.59	73.739	53.821	34.837	37.203
P59328	WDHD1	Wdhd1	0.319743	-0.326	3.5032	4.93	5.6939	5.7988	2.2279	3.8639
Q8VBV7	CSN8	Cops8	0.325965	-0.609	4.1234	11.743	9.1147	13.494	2.3339	3.9466
Q9D2G2	ODO2	Dlst	0.324733	-0.426	24.91	14.861	24.083	15.715	16.124	14.513
P62862	RS30	Fau	0.323532	0.683	34.84	8.9752	36.874	35.805	35.372	37.672
Q921M4	GOGA2	Golga2	0.324736	-0.511	0.90783	2.3797	0	1.3225	0.84472	0
O70325	GPX4	Gpx4	0.326477	0.708	1.2566	0	5.4135	3.7288	1.9649	2.7883
Q3THK3	T2FA	Gtf2f1	0.323424	-0.604	8.013	8.065	10.105	8.213	2.0431	11.079
O09106	HDAC1	Hdac1	0.326575	-0.289	13.415	17.724	31.438	18.328	13.813	16.204
G3X9B1	G3X9B1	Heatr1	0.326025	-0.674	8.9465	15.8	17.897	3.6648	12.931	13.138
O35737	HNRH1	Hnrnph1	0.324941	-0.461	41.425	89.18	54.664	85.381	26.194	34.608
Q99LX0	PARK7	Park7	0.323127	-0.423	35.197	40.99	123.24	49.976	33.323	44.346
P09411	PGK1	Pgk1	0.324286	-0.452	713.11	834.05	1686.3	1474.8	406.2	653.53
O08547	SC22B	Sec22b	0.322902	-0.297	10.504	19.202	20.138	14.622	13.402	11.175
Q9WV32	ARC1B	Arpc1b	0.329095	-0.821	4.5791	2.799	13.423	2.2204	1.5854	8.8605
Q9WUK2	IF4H	Eif4h	0.327207	-0.545	19.696	21.027	18.656	8.7396	10.943	26.038
Q8JZK9	HMCS1	Hmgcs1	0.330193	-0.288	17.828	34.603	46.966	29.963	20.917	25.422
O08756	HCD2	Hsd17b10	0.329506	1.05	4.5074	0	10.675	13.492	3.6223	6.0358
A2AAJ9	OBSCN	Obscn	0.329364	-0.754	1.3525	0	4.3125	0	1.5458	0
Q9R0B9	PLOD2	Plod2	0.330906	0.292	0	0	0	0	0.75767	1.0838
P17225	PTBP1	Ptbp1	0.32931	-0.367	109.17	267.75	252.04	249.66	97.265	141.54
Q62393	TPD52	Tpd52	0.328094	-1.18	8.3953	2.867	0	0	0	3.7443
Q3TSG4	ALKB5	Alkbh5	0.334932	-0.415	1.9541	2.8363	4.3472	3.5157	1.0385	2.7816
P47757	CAPZB	Capzb	0.333846	-0.325	34.762	79.553	108.29	67.3	44.585	50.728
Q9DD18	DTD1	Dtd1	0.334617	-0.488	0	1.2775	2.6672	0	0	1.4529
Q62422	OSTF1	Ostf1	0.332976	0.261	1.8893	2.7127	3.3516	3.2082	2.6164	3.5178
P54728	RD23B	Rad23b	0.333531	-0.28	11.101	11.216	15.478	13.649	8.1959	9.6215
P14869	RLA0	Rplp0	0.331837	-0.492	190.96	482.38	585.76	537.83	129.25	279.27
Q6ZWN5	RS9	Rps9	0.333812	-0.283	249.92	296.58	282.59	276.21	191.53	219.65
Q07076	ANXA7	Anxa7	0.337574	-0.449	25.582	51.726	34.859	39.586	12.51	36.634
P62965	RABP1	Crabp1	0.336775	-0.274	1.2451	1.3657	2.0366	1.6342	0.89808	1.3339
Q99J77	SIAS	Nans	0.337575	-0.49	3.7942	3.0322	6.8792	5.61	1.4226	3.5813
P62918	RL8	Rpl8	0.336288	-0.254	200.87	312.8	377.51	323.97	182.88	236.25
A0A5F8MPY2	A0A5F8MPY2	Rplp2	0.336227	0.571	6.9425	2.5376	5.0219	8.0976	3.9897	8.9732
Q8BUN5	SMAD3	Smad3	0.337403	0.873	3.721	0	6.5443	8.1003	3.3174	3.8311
Q62384	ZPR1	Zpr1	0.336752	-0.647	4.7084	2.8507	8.8994	7.6264	2.5955	1.5732
Q99L13	3HIDH	Hibadh	0.342503	-0.625	7.4425	5.709	23.576	5.5398	10.632	4.6409
P84099	RL19	Rpl19	0.342174	-0.295	91.124	171.21	139.88	107.07	104.17	105.92
Q6ZWU9	RS27	Rps27	0.340073	-0.565	32.483	59.027	31.31	37.747	37.089	13.245
Q9CZ13	QCR1	Uqcrc1	0.340606	0.294	17.362	26.278	43.589	47.275	25.179	30.813
Q9CVB6	ARPC2	Arpc2	0.345022	-0.503	1.9771	3.3164	7.5082	1.8259	3.5119	2.6973
Q8BZ98	DYN3	Dnm3	0.343798	-0.532	1.135	0	2.3851	0	1.1402	0
P11352	GPX1	Gpx1	0.346517	0.649	3.4619	1.346	9.0483	6.9898	4.0528	5.7393
Q9Z204	HNRPC	Hnrnpc	0.344338	0.358	42.927	70.363	147.37	136.95	81.48	83.993
Q9JHR7	IDE	Ide	0.343875	-0.398	7.4348	12.933	30.242	15.39	8.2267	10.048
Q60972	RBBP4	Rbbp4	0.345102	-0.309	43.036	54.985	42.477	44.954	32.686	36.007
Q80TE0	RPAP1	Rpap1	0.34593	-0.54	0	2.0551	3.2477	0	1.395	1.0853
Q62523	ZYX	Zyx	0.344828	-0.262	1.5134	1.8662	2.4718	2.0659	1.4403	1.3606
P84091	AP2M1	Ap2m1	0.349179	-0.321	5.1411	8.5378	8.0386	8.3621	5.4045	4.0065
Q9Z2W0	DNPEP	Dnpep	0.347145	-0.458	28.57	20.522	63.978	41.681	15.573	22.302
Q61545	EWS	Ewsr1	0.348421	-0.352	14.16	11.445	12.96	12.125	9.8883	8.4294
Q9D1H7	GET4	Get4	0.347693	-0.696	4.041	12.802	6.962	10.46	4.9086	1.6482
Q6P8I4	PCNP	Pcnp	0.348019	-0.362	4.5677	3.656	4.8594	3.1213	3.6826	3.3263
P70208	PLXA3	Plxna3	0.348466	0.812	1.6226	0	1.2822	0	1.6655	5.3668
P26350	PTMA	Ptma	0.350453	0.351	26.923	55.915	44.4	81.013	29.622	57.773
P63276	RS17	Rps17	0.346924	-0.775	37.948	241.06	147.82	199.31	29.593	45.788
O54988	SLK	Slk	0.349486	0.404	1.4706	0.95547	2.5223	3.0094	1.497	1.8243
Q9QXK3	COPG2	Copg2	0.35442	1.14	1.5284	0	13.008	12.014	7.0818	1.7102
Q99LC5	ETFA	Etfa	0.354201	-0.401	13.188	29.985	34.785	24.666	9.2714	26.112
Q7TNC4	LC7L2	Luc7l2	0.354263	-0.27	35.704	62.683	67.448	42.951	38.558	51.976
Q9CQ48	NUDC2	Nudcd2	0.354576	-0.281	11.239	11.473	13.936	12.991	7.0119	11.004
Q3V0C5	UBP48	Usp48	0.35121	-0.454	2.2547	9.3638	8.756	4.281	3.1522	5.3307
P47758	SRPRB	Srprb	0.357118	-0.313	2.9407	5.5025	4.3906	4.7338	3.1155	2.5144
Q99M87	DNJA3	Dnaja3	0.360048	0.619	0	1.622	5.3035	4.7109	1.722	2.3223
Q9D903	EBP2	Ebna1bp2	0.360566	0.399	0.91368	0	0	0	1.2028	1.2876
Q6PDL0	DC1L2	Dync1li2	0.364136	-0.514	1.7148	0	1.1785	1.2932	0	0
Q91WG4	ELP2	Elp2	0.366172	-0.699	1.993	0	4.0722	2.4474	0	0.9001
P11404	FABPH	Fabp3	0.364091	-0.259	53.44	73.357	99.136	61.218	60.762	60.991
Q9JJ28	FLII	Flii	0.366771	0.853	2.67	0	0	6.0973	1.8196	0.90978
P34884	MIF	Mif	0.365975	0.6	79.426	23.769	117.33	102.54	81.079	92.726
Q922R8	PDIA6	Pdia6	0.366623	0.374	77.81	67.82	139.24	210.62	82.541	91.949
Q9Z2Z6	MCAT	Slc25a20	0.365765	0.398	1.5051	5.3732	3.053	3.9708	3.0095	4.7236
Q99JT2	STK26	Stk26	0.364917	0.343	2.7249	3.0097	5.5237	3.6668	4.5812	5.5066
Q9JHJ0	TMOD3	Tmod3	0.364721	-0.495	2.0738	1.0386	3.0819	1.3416	1.6993	1.0412
Q9WTP6	KAD2	Ak2	0.366779	-0.251	37.479	63.146	90.441	59.511	42.935	49.715
Q9CQH7	BT3L4	Btf3l4	0.369637	1.12	0	0	5.3996	11.442	3.2243	0
Q9Z2L7	CRLF3	Crlf3	0.370254	-0.825	0	6.9995	3.0157	1.0942	0.69546	3.0184
P05201	AATC	Got1	0.36954	-0.254	96.852	112.88	191.91	137.92	85.372	104.97
P62245	RS15A	Rps15a	0.367088	-0.353	71.223	46.528	107.81	65.322	46.541	56.397
Q65Z40	WAPL	Wapal	0.370443	-0.428	1.3872	5.0423	2.1695	2.1408	1.7625	1.6529
Q61210	ARHG1	Arhgef1	0.370968	0.282	1.0044	0.99545	1.8967	2.0452	1.1371	1.4668
Q9QXT0	CNPY2	Cnpy2	0.374713	0.636	4.7758	1.2648	7.4659	6.8624	4.5525	5.42
Q9CWR8	DNM3L	Dnmt3l	0.373445	-0.288	24.389	35.827	47.649	28.549	32.48	24.689
P16858	G3P	Gapdh	0.373552	-0.242	3183.4	5468.9	7377.3	5280.5	3512.9	4185.1
P24472	GSTA4	Gsta4	0.37201	-0.248	73.817	88.504	138.8	94.587	62.455	91.719
P70168	IMB1	Kpnb1	0.372588	-0.275	184.13	300.73	305.49	334.8	144.73	196.92
Q99MN9	PCCB	Pccb	0.374946	-0.533	1.4651	0	2.7977	1.0405	0.59897	1.496
Q9DBD5	PELP1	Pelp1	0.371741	-0.852	8.3754	51.024	37.49	33.824	3.3135	24.314
P25425	PO2F1	Pou2f1	0.373673	-0.245	1.918	2.8948	2.6797	2.6762	1.7721	1.8856
P50543	S10AB	S100a11	0.372373	-1.02	6.0492	5.5137	0	1.4498	0	4.3689
Q60931	VDAC3	Vdac3	0.371021	0.834	0	10.185	6.3087	7.85	5.1911	5.4055
P55264	ADK	Adk	0.377489	-1.05	15.277	24.386	3.9733	1.6476	7.3414	13.741
E9QAE3	E9QAE3	Btaf1	0.377373	-0.429	1.4396	1.4998	1.8919	1.9511	1.3755	0
D4AFX7	D4AFX7	Dnajc13	0.377246	-0.477	1.6652	0.82913	1.0583	0.89074	0.51326	1.1855
Q9DCH4	EIF3F	Eif3f	0.377062	-0.351	54.927	38.956	91.636	66.852	34.649	40.768
P43275	H11	Hist1h1a	0.37689	-0.382	33.909	47.538	94.681	30.61	42.374	53.131
Q8BTS4	NUP54	Nup54	0.377306	0.619	0	4.7896	2.6578	5.5319	1.8445	2.7328
Q8VEE4	RFA1	Rpa1	0.379154	-0.324	11.765	16.737	13.838	14.003	12.37	8.0165
Q8BFZ3	ACTBL	Actbl2	0.381073	3.58	0	709.26	0	1226.7	895.42	0
Q60631	GRB2	Grb2	0.381363	0.604	6.5846	1.6155	6.6628	7.0391	5.6656	6.2365
E9Q634	MYO1E	Myo1e	0.383833	0.621	3.0204	3.1555	13.969	5.1385	13.073	7.2072
E9QAP7	E9QAP7	Taf4a	0.381365	-0.552	0.91414	2.4082	0.5888	0	0.75968	0
Q9JKP7	DPOE3	Pole3	0.385662	0.582	1.4679	0	2.1898	3.7476	0.77696	2.5523
Q3UPL0	SC31A	Sec31a	0.38792	-1.05	6.5754	31.688	46.926	69.52	4.5463	3.478
Q9CZU3	MTREX	Skiv2l2	0.385275	-0.235	11.772	17.623	24.823	19.615	12.002	13.405
A2BH40	ARI1A	Arid1a	0.392225	-0.429	1.4127	6.8311	3.7448	2.6502	2.2011	2.5407
P51863	VA0D1	Atp6v0d1	0.391346	0.55	1.6822	0	3.9795	3.0869	1.8108	2.5861
Q8C166	CPNE1	Cpne1	0.391271	0.38	9.7927	7.4623	20.414	12.842	14.034	18.236
P08752	GNAI2	Gnai2	0.390963	0.238	7.7149	8.1957	12.558	12.637	8.7341	11.813
Q9D1N9	RM21	Mrpl21	0.389432	0.493	1.8725	0	2.5278	2.601	1.7769	1.9645
Q9CQ60	6PGL	Pgls	0.390215	0.27	7.8325	9.7009	17.204	16.257	12.904	10.936
Q8R3D1	TBC13	Tbc1d13	0.389289	-0.355	1.705	5.0537	4.5043	4.462	1.8924	2.1988
Q9EPU4	CPSF1	Cpsf1	0.394574	0.612	2.0895	1.1217	8.7632	5.1293	4.1174	3.4704
P47199	QOR	Cryz	0.396244	0.629	1.9268	0.79647	4.9005	4.919	1.4028	4.027
Q8BG30	NELFA	Nelfa	0.396487	-0.461	4.6982	2.9792	9.3297	7.4246	2.3759	2.8356
Q8BJU0	SGTA	Sgta	0.394553	0.757	2.8272	1.1952	13.79	7.9941	3.1414	8.9615
P26369	U2AF2	U2af2	0.394007	0.509	3.3869	4.8633	17.824	18.341	6.5383	7.0524
P97315	CSRP1	Csrp1	0.401063	0.847	4.6692	0	9.6348	5.8992	6.1478	4.9765
Q8BU30	SYIC	Iars	0.399783	0.374	29.208	29.308	20.741	49.755	31.214	24.884
O88520	SHOC2	Shoc2	0.399934	0.356	1.0137	0	2.0141	1.8123	1.0985	1.4819
P70697	DCUP	Urod	0.399953	-0.63	1.1431	2.2484	7.1868	0	2.142	2.681
Q06185	ATP5I	Atp5i	0.405148	-0.279	10.52	25.616	19.31	19.902	10.139	14.423
Q9ERK4	XPO2	Cse1l	0.406363	0.685	63.133	93.559	111.6	97.855	54.536	513.27
Q9R0Q7	TEBP	Ptges3	0.404915	-0.355	11.309	24.404	41.1	15.872	20.562	16.62
Q8K1N4	SPAS2	Spats2	0.404495	-0.529	1.8781	0.74591	2.1095	2.0421	0.77206	0
Q9EPK7	XPO7	Xpo7	0.406137	-0.627	1.8531	2.1175	10.817	1.3277	3.2556	2.6657
Q7TMS5	ABCG2	Abcg2	0.407489	0.62	2.2505	0	5.004	3.1952	3.3064	2.6667
P56135	ATPK	Atp5j2	0.407346	0.218	24.008	36.236	34.882	43.266	31.34	35.186
Q8WTY4	CPIN1	Ciapin1	0.407538	-0.264	3.0252	5.6878	6.2326	5.7915	3.5461	3.0157
Q9D0M3	CY1	Cyc1	0.407323	0.688	9.6027	2.2304	17.886	20.454	8.4684	9.2399
Q9CQM9	GLRX3	Glrx3	0.407979	0.398	13.353	6.1135	15.314	16.238	11.411	15.432
Q62470	ITA3	Itga3	0.407715	0.371	16.93	10.666	13.964	17.56	19.968	15.558
Q9Z2U0	PSA7	Psma7	0.411177	-0.364	29.057	82.341	91.721	72.86	25.395	55.671
Q9WTM5	RUVB2	Ruvbl2	0.407893	-0.221	124.09	211.61	252.22	172.34	142.38	170.48
O88342	WDR1	Wdr1	0.407894	-0.428	21.173	9.5837	23.257	15.587	13.234	9.3934
Q8VDP4	CCAR2	Ccar2	0.41503	-0.552	0.87519	5.5468	5.1946	2.1001	2.6575	1.4337
Q6A068	CDC5L	Cdc5l	0.416245	-0.288	92.306	156.82	138.78	84.754	102.42	127.13
O35345	IMA7	Kpna6	0.416042	0.558	0.92448	0	4.7443	2.1926	1.5967	2.7521
P02468	LAMC1	Lamc1	0.413645	-0.447	10.724	19.337	15.022	27.545	5.795	7.7051
P62715	PP2AB	Ppp2cb	0.412579	-0.371	11.698	13.352	13.887	6.9008	9.2184	15.751
Q99LF4	RTCB	Rtcb	0.416572	-0.312	34.251	23.428	54.097	31.352	25.2	28.741
Q9CR62	M2OM	Slc25a11	0.412755	-0.486	5.7612	14.653	6.788	11.717	5.8338	3.0486
Q9D880	TIM50	Timm50	0.415856	-0.237	11.937	22.247	17.408	17.28	10.968	14.892
P05063	ALDOC	Aldoc	0.420972	0.377	0	2.4439	1.356	1.5843	1.4307	1.9358
Q8C0L8	COG5	Cog5	0.420238	-0.318	1.444	2.3059	1.2725	1.4875	1.2425	1.1837
O88544	CSN4	Cops4	0.421064	-0.224	13.851	19.927	22.452	21.052	10.569	17.465
Q91VN6	DDX41	Ddx41	0.419825	-0.317	0.82051	0	1.7621	0	0	1.0006
Q99LC8	EI2BA	Eif2b1	0.416916	-0.662	2.3911	5.7218	2.7616	6.4258	0	2.5017
Q9D2Y9	ELOV7	Elovl7	0.419563	-0.327	0.85464	1.1522	0	1.451	0.52191	0.61365
Q64378	FKBP5	Fkbp5	0.420201	-0.318	18.403	25.471	24.847	34.896	10.749	16.017
Q9CYL5	GAPR1	Glipr2	0.417126	0.419	1.2609	5.9226	5.3955	5.1629	4.6999	3.9701
O88958	GNPI1	Gnpda1	0.41853	0.663	11.084	3.6348	37.462	24.824	12.583	19.184
P61290	PSME3	Psme3	0.418473	0.496	5.9254	11.144	39.742	32.796	16.198	13.849
Q9WVM1	RGAP1	Racgap1	0.41934	-0.657	1.2484	1.3686	6.5865	0	2.9398	1.1236
Q3UI43	BABA1	Babam1	0.423286	-0.753	8.1799	12.388	3.0449	1.6354	5.3961	7.3082
Q91X52	DCXR	Dcxr	0.422153	0.295	0.46459	1.0215	1.2562	1.4915	0.99587	0.74197
Q8R2M2	TDIF2	Dnttip2	0.423313	-0.321	0	1.7623	1.2714	0	0.99374	0.80583
Q9WVK4	EHD1	Ehd1	0.423084	-0.27	11.358	20.601	22.47	23.304	8.7275	14.748
A8DUK4	A8DUK4	Hbbt1	0.425517	-0.945	4.6823	0	0	0	1.7962	0.27035
O35621	PMM1	Pmm1	0.425168	0.934	0	15.354	16.901	14.086	8.1829	9.4954
P69566	RANB9	Ranbp9	0.425268	0.67	2.676	0.67308	5.0201	2.2623	3.3544	4.799
P40336	VP26A	Vps26a	0.426783	-0.296	1.7714	3.2023	5.9469	3.66	1.7196	2.8954
P46664	PURA2	Adss	0.427425	-0.301	52.684	74.959	177.93	94.161	62.116	64.268
P47753	CAZA1	Capza1	0.43006	-0.479	8.0577	7.628	36.352	16.481	5.7328	8.7372
P11688	ITA5	Itga5	0.428622	0.786	5.5407	0	7.8954	6.1641	3.8638	6.487
Q9DCJ9	NPL	Npl	0.428134	0.572	0	0	1.9552	1.5204	2.8262	0
Q9JM62	REEP6	Reep6	0.429699	-0.265	0.80561	0.94019	1.2834	0	0.54703	1.179
P70122	SBDS	Sbds	0.428086	0.427	3.6213	16.217	17.102	12.673	10.314	18.666
P52624	UPP1	Upp1	0.427513	0.786	13.806	3.9146	70.66	34.974	22.117	25.292
P47738	ALDH2	Aldh2	0.435052	0.208	105.82	129.24	181.19	209.99	119.42	152.29
O08583	THOC4	Alyref	0.435435	0.564	5.7954	1.4687	8.4684	8.0091	4.3453	6.6857
Q921N6	DDX27	Ddx27	0.435357	0.577	0.32526	1.3303	2.207	0.80355	2.071	1.9043
Q64669	NQO1	Nqo1	0.435445	-0.323	11.297	34.75	36.221	30.417	12.735	18.75
Q61990	PCBP2	Pcbp2	0.434268	0.4	38.536	92.366	219.17	185.08	96.263	100.56
Q9WUK4	RFC2	Rfc2	0.43445	-0.273	4.3499	4.1101	9.7484	5.4973	3.6831	4.8839
P47911	RL6	Rpl6	0.437191	-0.212	261.55	324.34	530.17	360.17	247.91	324.02
O35857	TIM44	Timm44	0.432956	-0.487	6.1601	12.291	3.8788	7.3762	2.3806	6.0721
P52479	UBP10	Usp10	0.432524	-0.693	9.0794	8.9132	22.686	28.033	1.9314	8.0221
Q03265	ATPA	Atp5a1	0.441473	-0.26	589.86	787.33	920.13	1095.2	443.09	513.01
Q3UQU0	BRD9	Brd9	0.439628	0.281	0	0	0.5216	0.94465	0.6615	0
Q8BIQ5	CSTF2	Cstf2	0.441644	-0.522	19.096	14.009	14.589	17.994	3.6788	19.929
O35435	PYRD	Dhodh	0.438829	0.778	9.6712	1.4982	22.032	17.762	8.0284	11.288
Q61249	IGBP1	Igbp1	0.442702	-0.331	6.5816	8.4669	12.098	10.044	3.2815	10.281
P42669	PURA	Pura	0.441401	0.782	2.4853	0	9.9653	10.366	2.1381	3.9137
Q99J62	RFC4	Rfc4	0.437669	0.536	7.2588	9.1214	15.573	10.425	34.374	8.7694
O09044	SNP23	Snap23	0.440099	0.524	1.8058	0	2.7049	3.2395	0.97111	3.1775
Q8C0E2	VP26B	Vps26b	0.441751	-0.244	1.6909	2.8147	2.2757	2.6321	1.6543	1.498
P18572	BASI	Bsg	0.445607	0.602	3.7576	35.137	36.446	23.635	27.558	25.81
Q9D1A2	CNDP2	Cndp2	0.448153	-0.236	59.696	104.12	154.75	122.87	62.768	76.394
Q03145	EPHA2	Epha2	0.447454	-0.333	3.0857	10.189	7.2611	5.6676	5.5158	3.6568
P05202	AATM	Got2	0.444305	-0.269	103.86	137.5	307.25	182.99	108.62	126.24
Q8K205	Q8K205	Pop1	0.446855	-0.254	10.696	10.901	19.454	10.223	11.149	11.73
Q9QUR6	PPCE	Prep	0.447409	-0.65	10.798	106.42	17.846	30.946	10.752	15.953
Q9CUU3	SYCP2	Sycp2	0.443598	0.898	10.55	0	3.3062	3.5581	5.1219	8.5375
Q91YR1	TWF1	Twf1	0.442878	0.824	0.7516	0.60665	10.453	6.0387	1.4896	2.9386
O88384	VTI1B	Vti1b	0.442755	1.53	1.7161	0	2.5783	0	80.59	1.0384
Q9CWJ9	PUR9	Atic	0.452632	-0.271	139.39	233.59	353.36	320.92	118.49	172.19
Q8BTV2	CPSF7	Cpsf7	0.453152	-0.888	4.8281	7.2995	0	6.828	0.60728	1.2491
Q7TSG2	CTDP1	Ctdp1	0.452811	-0.28	0.85868	0	1.6605	0	0.665	0.9494
Q810A7	DDX42	Ddx42	0.452045	-0.192	18.383	28.663	29.23	26.773	17.201	22.454
P70404	IDHG1	Idh3g	0.451597	-0.573	1.389	1.583	7.2245	3.065	0	2.6562
P58044	IDI1	Idi1	0.449846	0.809	0	0.69836	5.6592	6.7196	0	3.2251
Q9CQ65	MTAP	Mtap	0.450282	-0.456	13.342	10.213	50.803	12.424	10.783	20.038
Q61879	MYH10	Myh10	0.453712	-0.382	27.058	45.974	126.36	35.896	49.433	40.019
Q6PDN3	MYLK	Mylk	0.448565	0.457	1.1161	0	1.7256	0	1.7131	2.3066
Q80TM9	NISCH	Nisch	0.448702	0.809	5.566	0	9.3709	10.656	5.1062	3.549
Q9D554	SF3A3	Sf3a3	0.4504	-0.422	6.1882	14.696	39.18	12.367	7.4927	15.981
Q6WKZ8	UBR2	Ubr2	0.45017	-0.444	0.44251	0	2.911	0	0.65108	0
Q3TAQ9	Q3TAQ9	Wdr36	0.451983	0.367	2.0415	1.2974	4.5862	3.1329	3.0803	2.6973
Q8C1Y8	CCZ1	Ccz1	0.455296	-0.276	0	1.3065	0.72109	0	0	0
O35286	DHX15	Dhx15	0.457344	-0.229	38.133	45.016	78.767	44.326	43.655	43.39
Q02614	S30BP	Sap30bp	0.457079	0.538	2.5795	0	0	1.5926	1.853	1.7195
O88746	TOM1	Tom1	0.454392	0.478	4.7546	5.8108	1.7837	7.0925	3.8265	4.9054
O88413	TULP3	Tulp3	0.455224	0.313	0	1.338	0	1.7517	0	1.3929
Q8R016	BLMH	Blmh	0.464594	-0.247	32.522	30.533	66.95	40.35	31.317	31.494
Q60952	CP250	Cep250	0.465107	-0.252	0	1.3822	0.94244	1.1387	0	0.69141
P18760	COF1	Cfl1	0.462262	0.491	404.81	155.4	816.09	920.23	404.3	382.91
P57759	ERP29	Erp29	0.463452	0.8	20.848	2.3367	36.423	16.592	20.672	27.305
Q9JLR9	HIG1A	Higd1a	0.463102	0.448	1.3023	2.0662	0	4.2408	1.3691	1.0975
Q6P9R2	OXSR1	Oxsr1	0.460088	0.678	4.762	0	5.3817	3.6604	3.356	5.8835
P62242	RS8	Rps8	0.464605	-0.234	177.55	228.11	416.58	269.74	146.77	261.85
Q9CYX7	RRP15	Rrp15	0.464566	0.418	1.9922	0	1.9648	1.8509	1.6262	2.137
Q9JKB3	YBOX3	Ybx3	0.465024	-0.834	7.3434	0	3.0446	3.8827	1.1235	0
Q8CI33	C19L1	Cwf19l1	0.468064	0.203	0	0	0.92429	0	0.69268	0.97663
O08788	DCTN1	Dctn1	0.467825	-0.376	0.64548	2.1254	1.4156	1.2935	1.2229	0.56117
Q6Y7W8	GGYF2	Gigyf2	0.468184	0.649	5.357	0	3.0353	3.2011	3.2637	4.1313
Q8VDD5	MYH9	Myh9	0.468651	-0.344	338.97	504.2	1339.2	525.83	580.59	366.64
Q9CPT5	NOP16	Nop16	0.470898	-0.484	1.4144	0	2.4873	0	1.6366	0
Q9QY81	PO210	Nup210	0.467089	-0.319	0.78521	2.0147	0	1.3009	0	0.98399
P11983	TCPA	Tcp1	0.470109	-0.243	363.3	529.89	574.56	702.55	295.87	321.01
Q8BWY2	CLC1A	Clec1a	0.476455	0.941	8.6072	0	22.993	7.0862	10.73	12.675
Q8BTZ7	GMPPB	Gmppb	0.476888	0.955	5.1945	0.56706	15.441	20.615	2.3703	6.7792
Q9R1P1	PSB3	Psmb3	0.474514	-0.78	4.8318	13.33	16.304	24.433	0.94925	8.9384
P26645	MARCS	Marcks	0.47824	-1.22	22.37	3.3814	0	0	0	10.917
Q8K224	NAT10	Nat10	0.481964	-0.279	9.2756	18.31	11.435	8.6874	10.714	11.687
Q9Z0H3	SNF5	Smarcb1	0.479155	0.296	4.04	2.6557	7.4559	6.6406	3.9267	5.6794
Q9QZN0	FBX15	Fbxo15	0.486165	-0.401	0.88164	2.7946	0	1.0946	0	1.5386
P50396	GDIA	Gdi1	0.488559	0.49	1.3664	9.1128	13.559	9.7766	6.3823	7.4988
Q11136	PEPD	Pepd	0.483684	0.563	6.618	1.7913	6.0341	8.8345	9.1817	2.8451
Q9DAW6	PRP4	Prpf4	0.488329	-0.302	8.1161	18.357	32.327	21.757	8.2352	14.349
Q62193	RFA2	Rpa2	0.485477	-0.279	3.9985	8.7434	9.1295	10.67	3.9188	4.275
Q9Z127	LAT1	Slc7a5	0.487934	-0.34	13.943	28.244	14.662	26.5	7.513	14.311
Q9JJX7	TYDP2	Tdp2	0.487231	-0.44	0	2.4184	0.54826	0	0	0
P97822	AN32E	Anp32e	0.490429	0.842	4.9408	0.69184	22.822	7.2591	7.6967	8.034
Q9ER73	ELP4	Elp4	0.493033	-0.422	1.726	1.8947	2.2631	3.5844	1.376	0
P01867	IGG2B	Igh-3	0.491713	0.772	7.2245	0	11.887	6.566	5.0583	8.8677
Q3U9G9	LBR	Lbr	0.49368	0.244	5.4963	6.8155	14.129	13.616	6.0501	10.673
Q9JIH2	NUP50	Nup50	0.493176	-0.313	3.049	6.2711	2.9334	2.6484	3.1394	3.5172
P25444	RS2	Rps2	0.494841	-0.22	128.26	297.05	337.52	210.35	194.78	198.56
Q9WVL3	S12A7	Slc12a7	0.492011	-0.3	3.1248	3.5425	3.4515	1.9075	3.0205	3.5512
Q61235	SNTB2	Sntb2	0.494089	-0.632	4.6889	3.7338	1.6009	1.1736	1.047	6.1317
O35855	BCAT2	Bcat2	0.496662	-0.218	19.294	33.7	49.221	26.961	28.55	26.447
P21550	ENOB	Eno3	0.497349	-0.855	3.174	0	8.9291	0	0	6.4061
Q8VHX6	FLNC	Flnc	0.495669	-0.75	6.2478	0.70273	0.7617	0	0	1.3651
P32883	RASK	Kras	0.498916	0.319	4.7372	13.425	7.363	12.174	5.2613	14.18
Q9DB15	RM12	Mrpl12	0.498463	-0.291	5.921	3.7385	5.7356	6.5376	3.3622	3.1518
Q8CGT6	PIWL4	Piwil4	0.500811	-0.192	7.0997	7.1735	11.887	8.833	6.4649	7.1118
Q6NZN0	RBM26	Rbm26	0.495877	-0.393	10.696	3.5179	10.518	6.2549	4.5246	6.1713
P62892	RL39	Rpl39	0.496086	1.05	259.98	10.958	640.98	190.01	297.95	286.54
Q62189	SNRPA	Snrpa	0.500251	-0.196	47.562	85.685	69.72	78.306	44.473	54.321
P58404	STRN4	Strn4	0.499331	-0.198	4.1542	3.9397	5.1435	4.8907	3.0964	3.681
Q91VR2	ATPG	Atp5c1	0.506289	0.179	27.031	39.311	56.016	48.957	41.807	42.223
Q8BVE3	VATH	Atp6v1h	0.503029	-0.269	7.3518	10.613	7.2086	7.423	4.3741	9.9113
P11276	FINC	Fn1	0.505248	0.375	1.8105	0.96336	2.4123	2.8746	2.6587	1.2006
P15864	H12	Hist1h1c	0.505624	-0.183	19.018	29.337	28.852	23.092	21.305	22.37
Q8CGP2	H2B1P	Hist1h2bp	0.503665	0.453	220.74	749.02	1448.7	914.73	1346.7	498.35
Q9DCT2	NDUS3	Ndufs3	0.503121	0.531	3.0513	0	5.2858	4.4233	2.2177	3.4186
Q9EQU5	SET	Set	0.507533	0.345	108.45	42.321	85.089	113.53	73.597	95.703
Q9D8U8	SNX5	Snx5	0.504743	-0.178	19.838	28.11	41.187	33.583	19.828	23.812
Q3TUH1	TAM41	Tamm41	0.504276	0.516	2.538	0	4.9641	2.5755	3.3536	2.9352
Q7TMY4	THOC7	Thoc7	0.502397	-0.376	1.1043	2.5718	1.5117	2.4805	1.2702	0
P31230	AIMP1	Aimp1	0.510212	-0.574	5.7324	3.1795	26.866	11.213	2.0013	6.6207
P18242	CATD	Ctsd	0.512345	-0.317	9.2076	26.335	51.915	21.266	14.68	20.837
Q8BH95	ECHM	Echs1	0.510251	-0.347	5.6907	18.306	28.8	20.879	7.5726	9.2216
P97807	FUMH	Fh	0.511895	-0.174	24.606	40.732	42.712	40.822	22.408	32.613
Q9CPV4	GLOD4	Glod4	0.510983	0.213	20.33	43.106	61.106	47.419	35.781	49.144
Q9Z2V5	HDAC6	Hdac6	0.510372	0.519	3.0608	0	5.0835	3.1545	3.1498	3.1746
E9PUA5	E9PUA5	Kifc5b	0.509596	-0.209	23.402	37.769	26.759	28.607	22.712	23.58
Q9QYF1	RDH11	Rdh11	0.513088	-0.192	3.3593	5.7213	5.9257	5.5723	2.7448	4.9942
Q8BH69	SPS1	Sephs1	0.509511	-0.337	3.2736	9.4418	5.3794	9.161	2.4661	3.6529
Q8CH25	SLTM	Sltm	0.513103	-0.308	2.3562	2.2383	1.2902	1.7735	1.3064	1.5467
Q9CSN1	SNW1	Snw1	0.50999	-0.4	9.3813	13.392	4.3799	6.6445	4.1656	8.6506
Q3TW96	UAP1L	Uap1l1	0.51182	0.358	16.002	5.9384	18.745	18.056	13.057	15.9
P61087	UBE2K	Ube2k	0.510883	0.468	2.5846	21.872	14.078	19.217	12.718	8.6208
Q99JY9	ARP3	Actr3	0.517973	-0.414	4.4576	20.454	37.826	17.374	8.8135	9.5218
Q6ZQ73	CAND2	Cand2	0.519536	0.22	4.176	6.3	4.9352	9.2366	4.7064	4.7165
P62897	CYC	Cycs	0.521796	0.388	15.644	6.6877	30.205	16.319	17.965	24.148
Q587J6	LITD1	L1td1	0.517901	-0.373	29.519	116.68	186.27	62.693	79.128	59.529
Q8BMA5	NPAT	Npat	0.517216	-0.168	0	0.83928	0.89647	0	0	0
A0A2I3BRL8	A0A2I3BRL8	Rbmxl1	0.520355	0.297	17.154	8.0688	17.275	18.325	13.933	17.382
Q8K021	SCAM1	Scamp1	0.519325	-0.64	0	3.6872	3.6456	5.8094	0	0
Q9DBG7	SRPRA	Srpr	0.519165	-0.341	1.1198	0	2.0865	0	0	1.5392
P61924	COPZ1	Copz1	0.525247	-0.97	0	4.111	16.354	14.644	0	0
Q9DCN2	NB5R3	Cyb5r3	0.525564	-0.258	30.383	49.713	61.418	76.037	26.864	26.567
P01869	IGH1M	Ighg1	0.523057	-0.178	1144.9	1995.9	2837.9	1865.6	1384	1734.2
P26516	PSMD7	Psmd7	0.528431	-0.246	121.75	190.53	264.82	124.81	198.41	148.81
O09167	RL21	Rpl21	0.528728	-0.248	32.807	35.909	60.787	66.733	22.564	28.406
Q6PE01	SNR40	Snrnp40	0.522983	-0.819	1.757	0	11.515	6.8701	0	0
Q9CRB2	NHP2	Nhp2	0.533159	-0.324	0	0.88335	2.6639	0	0	1.4106
Q80U93	NU214	Nup214	0.531985	-0.2	9.3615	9.1581	13.894	13.795	7.6154	7.482
Q9D051	ODPB	Pdhb	0.529262	-0.189	21.627	48.113	56.927	42.665	27.759	33.76
Q8CEC6	PPWD1	Ppwd1	0.535502	-0.442	1.9563	0	2.1346	0	0	2.2276
P35700	PRDX1	Prdx1	0.530191	-0.205	631.43	841.76	1691.7	883.33	688.04	965.68
Q922Q4	P5CR2	Pycr2	0.532519	-0.202	19.31	29.7	54.365	38.008	19.691	27.374
Q8BX22	SALL4	Sall4	0.530199	-0.187	16.815	18.843	20.034	21.258	14.699	13.775
P55821	STMN2	Stmn2	0.532731	-0.207	13.1	12.776	16.619	12.472	8.8447	16.383
P62500	T22D1	Tsc22d1	0.530577	-0.172	0.50391	0.97798	0	0	0	0
Q61187	TS101	Tsg101	0.532914	0.366	0	3.0709	0	1.7416	1.1711	1.8175
Q9CWF2	TBB2B	Tubb2b	0.529191	-0.234	412.47	551.67	848.33	840.73	271.97	519.31
P25976	UBF1	Ubtf	0.529313	-0.291	2.4429	6.2336	11.926	4.6579	3.5473	5.9954
Q8VDL4	ADPGK	Adpgk	0.538683	0.566	4.0551	0	8.0425	4.6869	3.7024	4.1973
Q91X20	ASH2L	Ash2l	0.53673	-0.657	2.3527	1.2853	19.517	6.6416	1.0042	2.2586
Q8BHG9	CGBP1	Cggbp1	0.540909	0.501	0	4.2897	6.8878	5.7626	1.7214	5.1122
Q8K297	GT251	Colgalt1	0.540938	0.462	13.971	3.9785	26.116	28.344	9.5849	13.954
P63073	IF4E	Eif4e	0.542512	-0.307	2.404	2.7876	10.499	3.3899	3.2841	3.3409
Q9CXY6	ILF2	Ilf2	0.536255	0.354	12.113	14.753	35.258	58.238	11.307	19.961
Q99JF5	MVD1	Mvd	0.539883	0.454	3.6179	4.9985	4.2694	20.31	1.9886	4.9101
Q9CZ30	OLA1	Ola1	0.53683	0.235	4.0945	8.6899	7.3223	9.357	4.2466	10.682
P49586	PCY1A	Pcyt1a	0.540139	0.329	1.6892	0	2.4482	2.1739	1.3737	1.8896
Q9D483	RPC3	Polr3c	0.538526	-0.209	0	1.1491	0.71285	0	0	0
Q925E1	SNTG1	Sntg1	0.538607	0.749	0	7.2164	0	4.5167	0	7.209
Q8CJ53	CIP4	Trip10	0.538098	-0.778	9.4325	0	11.141	6.3375	0.97666	2.32
Q6NZF1	ZC11A	Zc3h11a	0.537181	0.496	3.4527	3.5333	0	2.1759	3.0093	4.8705
Q8K3H0	DP13A	Appl1	0.549609	-0.281	0.78639	1.4445	2.7472	1.7297	0	1.6965
Q9JM76	ARPC3	Arpc3	0.547339	0.774	7.432	0	24.559	12.241	8.1719	6.2829
E9PWS4	E9PWS4	AU018091	0.548575	0.495	2.5655	0.66354	6.6548	3.3272	3.0428	3.1343
Q91V64	ISOC1	Isoc1	0.543218	0.231	1.8022	3.0434	1.7599	2.5086	2.4603	2.5275
Q3TJ91	L2GL2	Llgl2	0.543659	-0.401	0.65336	3.0244	3.0055	0.86385	2.0746	1.4409
P28656	NP1L1	Nap1l1	0.545262	-0.418	58.638	43.984	234.41	132.74	30.236	63.188
Q9R1P0	PSA4	Psma4	0.543587	-0.191	27.563	51.501	70.832	60.01	27.871	40.425
Q9D8W5	PSD12	Psmd12	0.544537	-0.155	20.282	25.287	30.006	28.742	17.644	21.97
P63323	RS12	Rps12	0.544864	-0.241	100.31	72.796	202.79	110.34	80.908	100.42
P10852	4F2	Slc3a2	0.550114	-0.169	120.09	120.55	159.41	129.34	105.13	119.31
P46978	STT3A	Stt3a	0.548412	-0.458	0	6.8728	2.7401	1.7351	1.2685	1.9991
Q8BYA0	TBCD	Tbcd	0.54974	0.236	1.9167	5.6923	3.8641	5.2302	4.1454	3.1777
P23591	FCL	Tsta3	0.548701	0.231	1.5573	1.1943	2.4793	3.1421	1.3964	1.6993
A0A1Y7VJN6	A0A1Y7VJN6	A0A1Y7VJN6	0.555958	0.238	NA	NA	NA	NA	NA	NA
Q61686	CBX5	Cbx5	0.554146	-0.333	2.9071	9.8501	4.3226	6.1899	4.4523	2.2451
Q5XG69	F169A	Fam169a	0.554394	0.325	1.3343	0	3.1521	2.2039	1.6068	1.6083
Q8BJL1	FBX30	Fbxo30	0.556832	-0.562	2.2663	3.0458	5.3332	11.49	0	1.6797
Q9CPU0	LGUL	Glo1	0.557302	0.629	7.3543	1.2487	25.704	8.3109	9.0192	11.652
Q9D0E1	HNRPM	Hnrnpm	0.555088	-0.272	259.52	503.63	408.99	206.94	394.06	372.21
Q8BUI3	LRWD1	LRWD1	0.556092	-0.536	3.3724	0	4.8502	2.7188	0	2.2913
E9Q409	E9Q409	Prss32	0.550974	0.207	24.841	20.285	30.25	28.15	29.323	28.397
P56371	RAB4A	Rab4a	0.551684	-0.391	1.9199	0.70406	0	1.6206	0	0.58113
Q6PDM2	SRSF1	Srsf1	0.557463	-0.157	95.704	113.03	152.92	112.67	88.717	119.41
Q3UIX4	Q3UIX4	Srsf11	0.556276	-0.192	0.49677	0	1.398	0	0	0
Q8VCK3	TBG2	Tubg2	0.55307	0.223	2.3727	1.7509	3.7081	2.8196	2.8233	3.0756
P20152	VIME	Vim	0.554647	-0.303	62.646	165.38	341.63	131.47	143.76	99.777
O08715	AKAP1	Akap1	0.561371	-0.18	16.246	18.436	18.778	15.461	15.474	16.166
P59242	CING	Cgn	0.56087	-0.292	0.81883	2.5277	1.5189	0	1.553	1.2691
O89079	COPE	Cope	0.558082	-0.398	1.3911	0.76493	2.7011	0	0	2.4386
Q99LC2	CSTF1	Cstf1	0.564416	0.282	0.67935	2.7846	1.6677	1.4933	1.7229	2.2061
Q99LB2	DHRS4	Dhrs4	0.563809	-0.231	1.4	2.2333	1.3471	2.2606	0.97598	1.1816
P62915	TF2B	Gtf2b	0.560469	-0.321	0	3.1629	2.1151	1.4379	0.79975	1.8061
Q5PSV9	MDC1	Mdc1	0.564111	-0.645	9.242	0	2.1456	1.0961	1.8002	1.81
Q9JK81	MYG1	Myg1	0.563289	-0.213	17.244	11.438	21.838	15.896	11.657	14.942
Q9JM61	THSD1	Thsd1	0.558458	0.508	6.5137	1.4804	11.571	4.4634	8.6126	8.3499
Q8BFR5	EFTU	Tufm	0.5593	-0.216	58.04	156.28	107.21	127.96	57.44	84.368
Q9CRT8	XPOT	Xpot	0.559781	-0.468	1.1098	0	5.3175	1.4925	1.6489	0
Q04447	KCRB	Ckb	0.571047	-0.245	125.82	211.65	290.33	333.89	85.827	162.21
Q8K363	DDX18	Ddx18	0.570464	-0.229	7.3176	13.104	11.975	16.572	4.7082	9.1426
Q9Z1N5	DX39B	Ddx39b	0.572709	0.253	223.97	117.48	306.81	252.78	206.31	261.84
Q9CQV7	TIM14	Dnajc19	0.571503	0.202	0.98582	0.8379	0	1.2471	0.72876	1.29
Q7TNG5	EMAL2	Eml2	0.569095	0.256	1.0956	0	0	1.8175	0.71876	0.91615
Q8VBV3	EXOS2	Exosc2	0.572844	0.334	1.3794	0	3.6518	2.616	1.3883	1.9119
Q9EQ06	DHB11	Hsd17b11	0.565384	0.482	3.0758	0	5.662	5.1019	1.7176	3.7282
Q8K411	PREP	Pitrm1	0.56538	0.466	0	7.7828	4.1243	3.8274	3.7602	3.5591
Q99J95	CDK9	Cdk9	0.577235	0.483	5.5279	0.86852	6.2659	3.9835	3.8537	5.3488
Q9D5V5	CUL5	Cul5	0.573306	-0.204	2.7794	8.2058	5.7156	4.8347	4.0735	4.334
O54734	OST48	Ddost	0.579897	0.165	39.594	41.291	72.439	74.8	39.997	55.739
P54731	FAF1	Faf1	0.576113	-0.149	10.162	14.023	14.203	13.412	8.5394	12.955
Q9WVR4	FXR2	Fxr2	0.573486	-0.311	1.7983	3.7602	10.423	2.7762	3.8944	3.4147
Q8VI75	IPO4	Ipo4	0.573331	-0.207	6.1023	9.2371	19.692	13.315	6.8458	7.9151
Q6A037	N4BP1	N4bp1	0.577125	-0.341	2.4473	2.9055	1.4997	1.0934	1.5904	3.017
Q78XF5	OSTC	Ostc	0.579549	-0.777	2.8646	0	10.368	11.006	0	0
Q9D0P7	PSRC1	Psrc1	0.575324	0.256	6.2027	3.2698	9.1276	8.0543	6.46	6.0608
Q9CQD1	RAB5A	Rab5a	0.574337	-0.188	12.703	10.127	14.297	11.245	9.72	11.387
P70441	NHRF1	Slc9a3r1	0.577849	-0.194	15.989	13.438	17.825	15.35	9.4912	17.568
Q91YT7	YTHD2	Ythdf2	0.575342	0.744	0	29.191	12.928	18.892	4.4959	12.641
P61750	ARF4	Arf4	0.585071	-0.22	7.0538	20.316	11.658	15.737	7.604	8.8281
Q61425	HCDH	Hadh	0.583804	0.474	1.2642	1.4783	14.803	3.762	3.6787	5.3579
Q8K2H2	OTU6B	Otud6b	0.585646	0.362	0	0	2.9605	2.0359	0	2.1682
O08709	PRDX6	Prdx6	0.587517	-0.227	40.479	116.99	143.7	123.75	53.958	63.525
Q9CQC9	SAR1B	Sar1b	0.580956	0.527	4.7149	0	7.6248	3.7541	3.5145	5.6134
Q62093	SRSF2	Srsf2	0.58732	0.347	15.281	66.536	46.59	87.86	50.541	21.95
Q3U0X6	Q3U0X6	Zfp217	0.583343	-0.206	0.52207	1.409	0.76958	0	0	0.71676
E9Q616	E9Q616	Ahnak	0.592101	0.565	3.497	25.293	9.7364	4.0755	20.654	33.129
P47754	CAZA2	Capza2	0.596939	0.269	46.459	22.384	74.068	75.929	34.658	51.222
Q99KK2	NEUA	Cmas	0.591325	0.425	0	7.4885	2.3323	3.2276	2.2795	3.4775
Q62095	DDX3Y	Ddx3y	0.592171	-0.461	1.5686	0	6.5722	0	1.809	1.7345
O54908	DKK1	Dkk1	0.595346	-0.391	0	1.8344	3.2048	0	0	3.0645
P00493	HPRT	Hprt1	0.594208	0.232	27.679	17.331	49.553	44.799	22.967	37.439
Q8R3F5	FABD	Mcat	0.590145	-0.338	2.122	1.8947	0	0	1.1873	1.8015
P62196	PRS8	Psmc5	0.590599	-0.195	53.549	97.511	59.069	62.85	44.727	73.202
Q8BKG3	PTK7	Ptk7	0.596573	-0.134	8.3163	10.278	12.273	11.041	7.5889	9.482
O89086	RBM3	Rbm3	0.596715	-0.268	9.6908	8.4001	7.0463	4.8497	6.6251	10.221
P14115	RL27A	Rpl27a	0.589084	0.218	181.98	125.17	294.04	211.54	181.74	274.1
B2RPU8	B2RPU8	Zbed5	0.5942	-0.239	14.279	7.0236	15.495	11.336	8.7875	9.4888
Q99JW2	ACY1	Acy1	0.600317	0.392	9.2911	4.759	3.6321	4.6363	5.1597	15.158
Q91VK1	5MP1	Bzw2	0.604023	0.297	22.851	10.197	47.875	34.853	24.243	24.46
Q99KN9	EPN4	Clint1	0.602181	0.232	1.1677	0	1.6526	1.2726	1.4415	1.1747
O70133	DHX9	Dhx9	0.602176	0.142	27.053	49.185	52.764	47.007	40.201	49.893
Q9JHU4	DYHC1	Dync1h1	0.599329	0.668	8.9427	0	1.0782	1.4198	4.3592	4.3012
A0A0B4J1H8	A0A0B4J1H8	Igkv1-133	0.602535	-0.179	78.37	119.05	148.08	80.687	87.462	134.85
Q91UZ5	IMPA2	Impa2	0.602737	-0.129	15.118	23.047	24.479	22.518	15.468	18.729
Q8CCS6	PABP2	Pabpn1	0.597562	0.31	17.06	30.115	37.576	69.703	37.584	14.051
P62315	SMD1	Snrpd1	0.601511	0.527	3.7918	0	10.591	4.467	5.7318	3.2297
P84104	SRSF3	Srsf3	0.604513	0.231	62.269	41.029	115.71	71.891	82.289	80.786
P24452	CAPG	Capg	0.611101	-0.157	25.149	23.16	36.323	26.319	24.152	24.037
Q9QXS6	DREB	Dbn1	0.610827	-0.195	0.76229	1.5591	1.0042	1.5447	0	0.86849
Q99KJ8	DCTN2	Dctn2	0.60838	-0.237	6.2028	12.639	5.4473	6.8473	6.9479	5.4877
P16125	LDHB	Ldhb	0.613628	0.144	69.274	102.2	158.05	118.52	95.313	133.71
Q99104	MYO5A	Myo5a	0.61284	-0.174	0	1.4464	1.1576	0	0.9473	0.85698
P62858	RS28	Rps28	0.613087	0.222	31.912	26.781	60.122	49.821	24.511	66.715
Q04736	YES	Yes1	0.608147	0.175	2.6396	4.6377	3.3201	4.4335	4.1348	3.1918
P62259	1433E	Ywhae	0.611407	-0.128	289.68	370.84	419.03	383.3	264.08	340.44
P45952	ACADM	Acadm	0.619373	-0.126	9.9829	15.124	19.258	14.219	11.143	14.108
P56480	ATPB	Atp5b	0.614432	-0.189	998.17	998.21	1907.8	1902.3	757.6	891.13
Q9DB20	ATPO	Atp5o	0.620625	-0.249	39.724	48.023	107.77	31.769	60.607	63.603
Q91WT4	DJC17	Dnajc17	0.617802	0.155	0.62179	0	1.211	0	0.88136	0.93594
P60843	IF4A1	Eif4a1	0.618106	-0.163	604.05	622.23	1355.7	944.79	576.75	665.92
P62880	GBB2	Gnb2	0.614847	-0.826	0	7.0509	11.543	23.904	0	0
P55302	AMRP	Lrpap1	0.617586	0.636	12.661	0	16.316	9.1492	6.9721	8.3742
P68372	TBB4B	Tubb4b	0.613916	-0.144	1820.2	1860.2	3117.1	2276.3	1806.5	1900.8
Q923D5	WBP11	Wbp11	0.61775	-0.562	7.0332	0	3.3836	0	1.4493	4.0516
Q9D2R0	AACS	Aacs	0.630384	0.175	8.3871	6.6455	12.09	14.78	8.5118	7.711
Q9EST5	AN32B	Anp32b	0.628312	0.262	15.561	10.11	44.377	20.856	23.004	25.101
P24288	BCAT1	Bcat1	0.630853	-0.123	45.883	57.719	77.378	71.727	42.229	52.348
Q9JL62	GLTP	Gltp	0.626965	0.324	1.8706	0	4.29	3.0111	1.9481	1.8468
Q9JJT9	PHAX	Phax	0.623379	-0.367	3.0716	0	2.3749	2.5553	0.97461	0.93971
Q3UA06	PCH2	Trip13	0.625656	-0.273	1.9626	11.762	6.1572	5.0175	4.2669	3.7619
Q91W90	TXND5	Txndc5	0.625277	0.391	5.206	1.2842	8.9254	3.8044	4.7976	7.3664
Q6P5E6	GGA2	Gga2	0.638404	0.313	2.0214	0	4.0322	3.3181	1.5559	2.0869
P43274	H14	Hist1h1e	0.638876	-0.143	9.6929	11.626	16.189	10.581	11.877	10.78
P38647	HSPA9	Hspa9	0.639082	-0.128	529.67	677.22	943.91	913.62	478.13	594.43
Q9Z0T9	ITB6	Itgb6	0.631287	-0.257	15.048	6.8504	23.158	10.782	12.51	10.372
Q9Z2I0	LETM1	Letm1	0.633297	-0.358	2.3533	0	1.0081	0	1.4336	0
Q8BX10	PGAM5	Pgam5	0.633026	-0.273	6.2612	8.3101	2.887	4.5683	4.2753	4.3581
Q07832	PLK1	Plk1	0.636626	-0.194	8.1398	5.0671	13.149	9.2522	6.1371	6.3759
P97470	PP4C	Ppp4c	0.636495	0.343	0	3	0	2.2775	0	2.5598
O08795	GLU2B	Prkcsh	0.632516	-0.329	23.898	6.5341	33.674	12.895	13.244	15.53
O35593	PSDE	Psmd14	0.639192	0.227	10.577	6.4329	23.345	18.239	12.174	11.462
P47963	RL13	Rpl13	0.639483	-0.156	212.42	312.81	211.22	246.46	173.39	237.44
P62077	TIM8B	Timm8b	0.640162	0.328	0	2.4493	1.8562	4.0839	0	2.2449
Q99NB8	UBQL4	Ubqln4	0.63656	-0.271	17.311	6.8695	8.0988	9.7232	6.2395	9.0406
P68134	ACTS	Acta1	0.645172	-0.494	0	0	12.62	1.3834	1.1964	1.1373
P54823	DDX6	Ddx6	0.642848	-0.265	32.592	19.277	89.296	31.221	22.768	45.441
P70372	ELAV1	Elavl1	0.643695	0.121	41.99	51.576	72.495	78.958	46.851	54.622
P14901	HMOX1	Hmox1	0.643186	0.137	16.318	27.12	39.54	40.609	23.727	24.161
Q9JKF1	IQGA1	Iqgap1	0.646326	-0.141	38.753	66.073	79.783	84.593	41.525	43.367
Q8K3Y3	LN28A	Lin28a	0.648596	0.184	3.0199	4.9981	11.722	7.3882	6.3208	5.5522
Q62425	NDUA4	Ndufa4	0.64776	0.233	4.0427	18.328	7.7049	11.173	7.0288	11.807
Q8CIH9	PUR1	Ppat	0.640871	0.263	17.327	17.57	17.276	14.427	13.886	45.323
Q99LS3	SERB	Psph	0.644791	-0.135	7.4518	12.694	16.555	10.107	9.8968	11.824
Q8CGF7	TCRG1	Tcerg1	0.649144	-0.218	4.6273	3.1017	11.79	6.2694	4.051	4.2303
Q3URK3	TET1	Tet1	0.644406	-0.137	0	1.0436	0	0	0.78251	0.65202
O54946	DNJB6	Dnajb6	0.650482	-0.227	3.1329	1.347	2.9016	2.4655	1.9309	1.6035
Q80X90	FLNB	Flnb	0.650866	-0.177	167.71	244.47	143.94	223.78	140.02	130.23
Q8BHN3	GANAB	Ganab	0.6542	-0.249	72.065	34.164	144.95	60.184	62.933	56.151
Q810D6	GRWD1	Grwd1	0.656444	0.145	0.63781	1.0614	1.1718	0	0.93105	1.3278
Q8R050	ERF3A	Gspt1	0.656839	0.291	17.926	7.1085	30.927	13.471	21.565	24.823
P17095	HMGA1	Hmga1	0.6524	0.415	4.3118	0	7.6084	4.0043	3.834	3.4859
P24668	MPRD	M6pr	0.65187	-0.326	1.4532	1.4718	3.849	4.4964	1.4914	0
Q9EQK5	MVP	Mvp	0.651187	0.303	2.2541	5.1753	1.1652	3.7356	3.178	2.1514
P46735	MYO1B	Myo1b	0.655882	0.254	1.4337	6.8293	5.6845	4.5611	6.1653	3.3556
Q8K202	RPA49	Polr1e	0.65716	-0.174	2.4629	3.8518	2.3207	2.3049	2.5908	2.5689
Q9D0L8	MCES	Rnmt	0.650604	-0.122	8.8328	15.537	17.285	12.692	10.665	13.611
Q9CWR2	SMYD3	Smyd3	0.652606	-0.159	1.3355	2.0967	1.2668	1.5562	1.1957	1.3686
P56399	UBP5	Usp5	0.654453	0.133	30.8	72.068	65.422	67.692	50.41	56.094
Q62465	VAT1	Vat1	0.65499	-0.132	48.706	55.853	102.14	71.305	55.206	53.612
Q99KC8	VMA5A	Vwa5a	0.65823	-0.253	1.037	0	2.388	0	1.4956	0.77554
Q9D8X5	CNOT8	Cnot8	0.666363	-0.202	0	2.7235	1.8229	1.7516	0.93273	1.2079
Q922J9	FACR1	Far1	0.666483	0.254	7.6143	8.425	3.0681	7.3536	5.6845	7.989
Q9ERG0	LIMA1	Lima1	0.66649	0.528	0	17.257	13.081	5.4812	13.474	5.5412
Q8VEJ4	NLE1	Nle1	0.663954	0.578	3.6427	6.0693	0	14.743	0	7.8443
Q8R2U4	NTM1A	Ntmt1	0.666135	0.191	0.55928	0	2.0617	1.2628	0.70557	1.3256
Q6PHQ9	Q6PHQ9	Pabpc4	0.665447	0.227	55.358	27.427	75.222	56.431	36.783	88.129
Q922H2	PDK3	Pdk3	0.665256	-0.185	0.79161	2.8827	2.3059	2.1839	1.3508	1.2148
Q9CR00	PSMD9	Psmd9	0.663825	0.167	7.3335	4.6661	7.2245	7.9885	5.4151	8.0923
Q80U78	PUM1	Pum1	0.663421	-0.51	2.5	0	4.9776	8.0303	0	0
O70551	SRPK1	Srpk1	0.659051	-0.364	6.6819	1.8274	13.276	8.4169	1.936	4.6661
Q99K28	ARFG2	Arfgap2	0.670316	-0.376	0	9.6048	2.1267	2.2434	1.2626	1.9966
Q9CY57	CHTOP	Chtop	0.676645	-0.124	1.482	2.7434	1.9925	2.1895	1.5198	1.8823
Q8BMK4	CKAP4	Ckap4	0.675453	-0.157	13.721	43.455	34.865	34.115	18.046	24.381
P97427	DPYL1	Crmp1	0.671851	0.185	1.2946	0	1.5983	1.7842	0.99104	1.183
Q9Z0Y1	DCTN3	Dctn3	0.676246	-0.289	0	4.0152	1.9312	0	1.5993	1.8519
P10630	IF4A2	Eif4a2	0.670967	-0.132	2.3051	2.4383	4.1458	3.1	2.6415	2.1636
Q60899	ELAV2	Elavl2	0.670158	-0.157	0.82085	0	1.4865	1.3237	0	0.77227
Q8R0A0	T2FB	Gtf2f2	0.670562	0.137	4.6234	11.354	13.12	12.769	7.8534	9.1395
O89112	LANC1	Lancl1	0.670682	-0.173	0.92602	1.6261	0	1.5055	0	1.0966
Q60605	MYL6	Myl6	0.673924	-0.126	15.239	24.645	28.833	20.407	22.193	18.399
Q9CWM4	PFD1	Pfdn1	0.673013	0.163	3.3553	2.3494	5.6373	4.0334	3.5749	4.3244
P12382	PFKAL	Pfkl	0.668698	-0.183	30.683	22.406	72.403	38.919	27.745	31.502
Q8CIH5	PLCG2	Plcg2	0.676786	0.275	0	0.80002	2.7765	2.4643	1.5511	0
P14131	RS16	Rps16	0.677558	-0.152	193.54	132.89	281.29	194.91	148.19	182.76
Q99JR1	SFXN1	Sfxn1	0.671495	0.147	4.4971	5.0092	3.9859	5.9962	4.6819	4.346
O54941	SMCE1	Smarce1	0.672797	0.292	0	2.8306	0	2.8362	0	1.7417
Q6A028	SWP70	Swap70	0.677226	-0.215	1.0626	0	1.821	0	0	1.6565
Q6IRU2	TPM4	Tpm4	0.672436	-0.278	5.3106	3.218	3.6683	7.1141	3.3552	1.4734
Q921M7	CYRIB	Fam49b	0.679832	0.336	2.8875	1.8233	13.686	12.83	3.8332	2.948
Q9D7X8	GGCT	Ggct	0.685049	0.644	0	17.649	2.4645	33.203	0.80165	3.7729
P43277	H13	Hist1h1d	0.683971	-0.122	167.33	238.84	246.07	182.64	201.87	206.99
Q61792	LASP1	Lasp1	0.680309	-0.165	42.002	33.303	39.705	48.457	19.694	41.294
Q61206	PA1B2	Pafah1b2	0.680362	-0.357	2.5472	0	3.4788	1.8468	2.5229	0
O70400	PDLI1	Pdlim1	0.685646	0.256	13.092	4.4944	16.646	9.5878	14.255	12.2
Q9JIF0	ANM1	Prmt1	0.685139	-0.227	7.4347	16.309	42.781	20.534	16.659	9.4621
O55142	RL35A	Rpl35a	0.685636	-0.141	38.488	53.771	35.729	50.196	28.067	39.164
Q9JLI8	SART3	Sart3	0.681954	-0.41	3.6946	50.654	30.344	28.425	16.128	5.2769
Q8K3F7	TDH	Tdh	0.685599	0.212	66.111	137.28	340.35	300.53	97.029	164.57
Q9JIF7	COPB	Copb1	0.688235	0.307	13.982	3.3457	23.189	12.602	9.6887	16.806
Q8BWY3	ERF1	Etf1	0.693225	-0.109	35.618	35.949	55.761	46.796	32.949	36.9
Q9CR98	F136A	Fam136a	0.696796	0.348	13.848	11.232	2.4233	13.872	9.6323	5.8211
Q01768	NDKB	Nme2	0.694327	-0.142	192.95	155.33	362.92	265.75	173.01	176.23
P01837	IGKC	P01837	0.68975	0.32	NA	NA	NA	NA	NA	NA
Q9R0L6	PCM1	Pcm1	0.691266	0.227	4.216	3.9762	2.0114	5.5922	3.9312	2.461
P63087	PP1G	Ppp1cc	0.692043	0.284	6.3331	9.4982	30.14	41.722	5.9008	13.302
P62334	PRS10	Psmc6	0.692929	-0.151	45.787	49.475	117.47	93.416	41.236	50.43
Q9DBG6	RPN2	Rpn2	0.691253	-0.24	21.025	30.029	53.401	58.706	9.3689	37.188
P62320	SMD3	Snrpd3	0.690506	0.197	30.422	14.932	32.26	41.752	16.129	32.751
Q9JLF6	TGM1	Tgm1	0.697238	-0.27	0.92935	0.99263	4.1068	3.4326	0.68726	0.91618
Q9DCG9	TR112	Trmt112	0.690422	-0.192	14.623	7.9542	18.086	16.402	6.2174	13.846
P45376	ALDR	Akr1b1	0.70046	-0.119	328.88	444.45	661.22	669.18	330.4	341.16
Q8K1M6	DNM1L	Dnm1l	0.702124	-0.185	9.8754	6.4741	24.923	11.331	7.9998	11.956
Q9DBZ5	EIF3K	Eif3k	0.698872	-0.118	13.615	14.163	27.897	18.063	13.353	17.467
Q8BHK9	ERC6L	Ercc6l	0.699036	0.143	1.2989	0.91403	1.358	1.3735	1.3042	1.2124
Q60668	HNRPD	Hnrnpd	0.703221	-0.12	49.344	60.483	87.919	76.458	35.915	74.43
Q8R081	HNRPL	Hnrnpl	0.706474	-0.177	29.431	77.295	159.01	87.286	50.978	56.231
Q80W00	PP1RA	Ppp1r10	0.69825	-0.123	0.88418	0.77216	0.96305	0.9764	0	0.87989
Q99JI4	PSMD6	Psmd6	0.705247	-0.24	26.769	8.3129	35.242	25.794	11.185	16.51
Q91V41	RAB14	Rab14	0.700388	0.168	13.053	6.8397	14.346	14.663	8.7787	14.097
Q6PFR5	TRA2A	Tra2a	0.701652	-0.14	5.3847	4.5297	9.1723	4.9857	4.9643	6.7555
Q9D358	PPAC	Acp1	0.709677	0.111	7.9194	8.4629	12.945	12.692	10.171	8.4681
Q8BP40	PPA6	Acp6	0.71696	-0.399	12.916	1.8338	20.501	2.6851	7.3208	10.764
Q07813	BAX	Bax	0.713723	-0.163	55.506	41.546	116.79	90.518	34.204	61.964
P97452	BOP1	Bop1	0.713576	-0.187	1.7184	2.7186	1.9318	4.3225	1.1469	1.235
P61804	DAD1	Dad1	0.712613	0.112	5.4039	5.799	7.6442	8.6471	4.3426	8.048
Q9JII5	DAZP1	Dazap1	0.709455	-0.289	0	4.4279	1.1656	0	0.86134	2.2881
Q9CY94	PSF3	Gins3	0.715758	0.246	0.96146	0	3.095	0	1.7214	2.2864
P14602	HSPB1	Hspb1	0.710146	-0.136	272.91	518.11	351.89	548.49	218.34	313.35
P13597	ICAM1	Icam1	0.712888	-0.107	0	0	1.0343	0	0.47474	0.83765
Q6ZPI0	JADE1	Jade1	0.710927	0.153	1.7351	1.8319	4.4431	2.1955	2.6798	3.301
Q9DB05	SNAA	Napa	0.717851	-0.142	9.7614	11.21	29.178	12.723	12.059	15.497
E9Q3G8	NU153	Nup153	0.709431	-0.676	91.104	92.677	5.8207	3.0828	48.884	80.008
Q8CI51	PDLI5	Pdlim5	0.71068	-0.241	0.9098	4.4026	1.9153	1.1242	2.5541	1.6177
Q9WU28	PFD5	Pfdn5	0.711707	-0.123	0.74202	0	1.5576	1.0719	0.69364	0.82894
P62141	PP1B	Ppp1cb	0.710171	-0.319	3.0426	29.081	24.47	26.501	6.2729	6.709
Q6PR54	RIF1	Rif1	0.715339	0.282	31.913	34.476	7.5933	32.207	19.531	23.857
Q3UMC0	AFG2A	Spata5	0.712748	-0.137	49.001	38.605	71.399	43.488	50.526	46.27
Q8BGF3	DAA10	Wdr92	0.710874	-0.19	1.5318	1.0381	2.1277	2.0198	0	1.9046
Q9CYA6	ZCHC8	Zcchc8	0.717924	0.297	3.8988	0	4.674	2.711	2.3842	3.6018
Q68FL4	SAHH3	Ahcyl2	0.728641	-0.221	1.0653	3.4305	7.1639	4.9688	2.2301	1.4932
Q8VC30	TKFC	Dak	0.724909	0.138	9.0694	6.5078	13.621	9.3548	8.9293	12.81
P32233	DRG1	Drg1	0.728308	0.119	26.543	19.644	39.588	34.628	24.256	31.505
O70194	EIF3D	Eif3d	0.72666	-0.126	23.92	30.672	74.865	43.605	29.729	32.58
Q9R1X4	TIM	Timeless	0.718715	0.18	2.4312	1.0638	3.1006	2.6716	2.1726	2.0091
Q6P5E4	UGGG1	Uggt1	0.72629	-0.226	3.482	2.2788	14.108	5.0374	2.5401	5.4712
P70460	VASP	Vasp	0.725671	-0.152	6.4879	12.353	14.96	13.205	11.897	5.5675
P14824	ANXA6	Anxa6	0.734753	-0.199	48.8	21.057	107.87	49.742	33.449	44.035
Q3V1H1	CKAP2	Ckap2	0.736728	-0.137	2.1797	2.5737	2.1308	1.6821	1.7422	3.0648
Q9R0P3	ESTD	Esd	0.735369	0.206	3.5209	9.4275	30.432	14.455	9.3786	11.429
P14152	MDHC	Mdh1	0.73309	0.129	41.007	60.016	108.59	107.21	39.285	82.908
Q99P88	NU155	Nup155	0.733151	0.424	5.9587	0.49939	9.7593	8.8713	1.5343	5.1484
Q6PFD9	NUP98	Nup98	0.732415	-0.157	1.598	4.1293	2.1838	2.3864	2.7583	1.579
Q8BVI4	DHPR	Qdpr	0.738451	0.168	2.6148	3.4657	9.9019	9.0219	2.6755	5.2667
Q64012	RALY	Raly	0.739443	-0.106	10.602	11.285	14.097	10.611	11.983	10.645
P35980	RL18	Rpl18	0.730691	0.108	71.802	159.48	173.36	182.79	90.321	150.64
Q6NZL6	TONSL	Tonsl	0.733253	0.132	4.9148	5.2458	12.645	7.8292	8.4393	6.4946
Q3TIX9	UBP39	Usp39	0.736984	-0.0974	5.3329	7.3714	6.4184	8.0785	4.3392	5.8786
Q8C5L3	CNOT2	Cnot2	0.74691	0.142	5.5195	2.8511	4.5482	5.3489	3.5865	5.0102
P30999	CTND1	Ctnnd1	0.742999	-0.12	25.728	26.824	20.214	26.585	16.825	24.283
Q8BQM4	HEAT3	Heatr3	0.745015	0.202	6.62	5.826	5.5689	19.5	3.286	5.1062
Q9CYI4	LUC7L	Luc7l	0.750018	0.154	9.6533	5.0786	10.72	12.039	5.0548	11.898
P17897	LYZ1	Lyz1	0.744967	0.242	1.7023	0	3.1596	1.329	1.1322	4.0704
Q91YP2	NEUL	Nln	0.743006	-0.112	0.64957	0	1.5383	0	0.80699	0.77763
Q05920	PYC	Pc	0.74498	0.136	0	1.8334	0.98115	1.123	1.1962	1.0754
Q9D819	IPYR	Ppa1	0.745625	-0.114	29.254	28.493	66.142	35.202	30.586	40.376
G3UXL2	G3UXL2	Prps1l3	0.742932	-0.178	12.843	12.698	54.999	16.813	18.915	19.478
P54775	PRS6B	Psmc4	0.742013	-0.0907	27.467	36.415	48.822	38.547	34.732	30.204
Q9CSU0	RPR1B	Rprd1b	0.74861	-0.137	1.2071	2.8698	1.2813	1.4947	1.4207	1.5706
P50431	GLYC	Shmt1	0.746244	-0.15	15.916	24.247	72.674	39.207	18.812	27.824
O35704	SPTC1	Sptlc1	0.745026	-0.122	0.98593	0.80628	0	0	0	1.1166
P97473	TRBP2	Tarbp2	0.74136	-0.181	1.7124	0	2.3234	1.5933	0.78634	1.5008
Q91V12	BACH	Acot7	0.756908	0.23	4.8546	1.6355	13.853	7.7226	4.0947	5.6133
Q8CFA2	GCST	Amt	0.756195	0.169	3.4396	13.093	23.687	14.677	9.1938	11.239
Q925I1	ATD3A	Atad3	0.752296	-0.125	4.0118	8.8461	5.3003	4.5044	5.4633	5.8971
P70444	BID	Bid	0.758555	-0.171	1.5923	0	2.4947	2.0901	0.86328	1.0622
Q9Z1Q5	CLIC1	Clic1	0.754564	-0.186	16.081	21.482	81.598	22.069	19.351	44.864
O55029	COPB2	Copb2	0.753808	0.187	11.49	10.012	24.404	8.6067	22.023	21.847
O35215	DOPD	Ddt	0.755908	0.116	7.5672	7.2055	13.283	17.178	6.5826	8.1576
Q8CIB5	FERM2	Fermt2	0.755738	-0.163	5.2472	11.066	9.2385	17.646	3.4276	6.3185
Q9WU62	INCE	Incenp	0.760762	0.234	0	2.5078	0	1.3479	2.7384	0
Q9D0I8	MRT4	Mrto4	0.761422	-0.646	0.095258	44.176	1.7077	5.0703	0	0
Q9JLN9	MTOR	Mtor	0.756287	0.167	1.3144	0	0	1.1842	0	1.6999
O55125	NIPS1	Nipsnap1	0.758536	-0.085	6.5016	11.956	11.664	11.166	8.611	7.9025
Q922K7	NOP2	Nop2	0.756113	0.157	25.711	29.844	36.975	19.586	42.062	47.704
Q04692	SMRCD	Smarcad1	0.755231	-0.2	2.0393	0	3.6599	1.7741	1.4669	1.3038
P54227	STMN1	Stmn1	0.756956	0.351	7.3134	0	3.8788	1.7013	2.946	8.0917
Q9DB77	QCR2	Uqcrc2	0.754486	-0.0998	13.32	31.689	24.682	20.882	17.658	22.961
Q9JMA1	UBP14	Usp14	0.760946	-0.102	17.596	24.539	45.263	36.271	15.935	27.354
O88532	ZFR	Zfr	0.75564	-0.121	4.2588	11.345	5.7052	7.3279	4.9993	5.8515
Q3THG9	AASD1	Aarsd1	0.763965	-0.122	2.7887	3.0154	3.357	2.2953	2.0938	4.5575
Q9CRB9	MIC19	Chchd3	0.771657	0.169	3.5309	22.621	10.488	10.98	10.832	10.015
O54833	CSK22	Csnk2a2	0.771051	-0.297	3.9098	0	1.7613	5.0796	0	0.84956
Q99LI7	CSTF3	Cstf3	0.767231	0.106	0	1.1397	2.1684	1.6268	0.90552	1.2662
Q6NZB0	DNJC8	Dnajc8	0.767527	-0.111	6.2109	9.1533	18.067	8.4471	10.532	9.1587
Q8BX17	GEMI5	Gemin5	0.763399	0.327	0	10.203	15.061	11.259	3.3695	4.8377
Q3THS6	METK2	Mat2a	0.767483	-0.111	180.24	122.63	250.91	167.29	159.55	164.8
Q7TPM1	PRC2B	Prrc2b	0.769279	-0.255	3.5212	0	2.1243	1.7315	0	2.9517
Q9CQT2	RBM7	Rbm7	0.76561	0.174	0	3.6101	3.4034	2.2061	2.0702	2.3378
Q9CXW4	RL11	Rpl11	0.770709	-0.132	273.47	145.41	433.69	269.56	199.61	243.75
Q8VEM8	S25A3	Slc25a3	0.770175	0.0902	87.61	186.93	138.15	191.5	109.91	129.66
Q9Z2I8	SUCB2	Suclg2	0.763504	-0.191	20.08	11.392	42.133	33.487	7.6836	25.199
Q9WUP7	UCHL5	Uchl5	0.763548	0.0964	3.2495	7.5106	5.9766	5.6566	5.4836	5.746
Q80YV2	ZC3C1	Zc3hc1	0.767826	0.12	6.9124	13.496	8.2209	15.813	5.6338	11.049
Q9CZU6	CISY	Cs	0.775342	-0.0844	87.226	157.55	143.35	152.71	77.686	139.32
Q9WUU7	CATZ	Ctsz	0.776883	0.134	3.0347	12.221	14.466	10.108	7.2158	9.7187
Q61539	ERR2	Esrrb	0.784161	0.186	2.2334	0	3.796	1.8153	2.0901	2.2661
Q8BY71	HAT1	Hat1	0.776386	-0.12	18.638	20.883	43.981	18.639	19.915	35.958
Q9D4J7	PHF6	Phf6	0.778515	-0.0907	0.39813	1.0446	0	0	0	0
Q9CQJ4	RING2	Rnf2	0.77752	0.18	4.6442	4.8339	5.9894	18.398	2.9123	3.6474
P62911	RL32	Rpl32	0.783451	-0.084	17.978	18.407	19.451	22.011	12.554	19.559
Q80UZ2	SDA1	Sdad1	0.784783	-0.286	6.5758	1.6069	19.976	8.8868	1.5163	8.6442
P97931	UNG	Ung	0.77558	-0.15	1.4651	0.67827	1.7677	0	1.1015	1.3453
P59999	ARPC4	Arpc4	0.794906	-0.108	8.9216	21.34	33.712	24.24	16.988	12.454
Q3TKY6	CWC27	Cwc27	0.787008	-0.0887	0	1.1054	0	1.2751	0.65216	0
P63213	GBG2	Gng2	0.785698	-0.12	0	1.6469	0	1.5106	0.76911	0
Q99LP6	GRPE1	Grpel1	0.793643	0.29	1.0906	11.145	2.4957	1.1773	5.4116	8.7088
P10649	GSTM1	Gstm1	0.793678	-0.117	4.2196	15.32	18.246	12.708	6.7562	10.763
Q9D0D5	T2EA	Gtf2e1	0.789433	-0.168	4.4896	22.244	25.049	21.776	5.8003	13.963
Q9WTX8	MD1L1	Mad1l1	0.792144	0.153	0.60287	3.182	1.3598	2.7691	0.94152	1.3766
Q8K310	MATR3	Matr3	0.795163	-0.11	14.668	39.849	47.27	33.261	33.233	19.879
Q60953	PML	Pml	0.79707	0.182	1.3034	2.7245	0.9507	0	2.0725	2.7372
Q9D0W5	PPIL1	Ppil1	0.792181	-0.235	0	3.8685	7.1928	2.9041	3.5583	1.0004
P62983	RS27A	Rps27a	0.785717	-0.0775	79.06	94.545	173.03	125.99	81.837	106.77
Q3TX08	TRM1	Trmt1	0.793344	-0.223	0.58052	0.90446	4.1435	3.699	0	0
P61161	ARP2	Actr2	0.801948	0.132	2.7982	2.2024	9.0952	6.813	3.2712	3.3079
P53996	CNBP	Cnbp	0.805443	0.294	1.9774	10.157	49.643	28.036	17.975	3.6426
Q9DAR7	DCPS	Dcps	0.804264	0.0782	8.6714	9.3746	13.081	17.08	7.0825	10.343
O08917	FLOT1	Flot1	0.808936	0.0784	0.7476	0.97917	0.79476	1.1044	0	1.0458
Q8CHP8	PGP	Pgp	0.802795	-0.115	3.7665	8.2212	8.4642	3.8736	5.8329	9.1249
P43883	PLIN2	Plin2	0.79824	0.102	0	1.2845	0	1.4674	0.97936	0
P27048	RSMB	Snrpb	0.8006	0.212	18.602	4.8825	52.289	18.582	19.689	20.152
Q8BFY9	TNPO1	Tnpo1	0.800714	0.0996	39.576	25.086	51.682	46.46	27.993	48.527
Q07417	ACADS	Acads	0.820371	0.0899	5.5019	5.4508	9.7647	11.222	6.9529	4.525
O35459	ECH1	Ech1	0.820225	0.236	4.2523	4.6183	1.3082	15.833	1.4261	1.8585
Q8VHM5	Q8VHM5	Hnrnpr	0.815899	0.251	1.5286	0	13.619	7.02	1.7297	1.9903
Q01114	IL9R	Il9r	0.818306	0.245	4.2	1.4405	0.57263	4.4738	0	2.175
Q8BG81	PDIP3	Poldip3	0.81586	-0.243	6.7571	0.95534	12.79	2.43	5.2067	3.9396
P24369	PPIB	Ppib	0.82118	0.109	52.256	26.673	80.62	49.795	44.643	63.388
P15331	PERI	Prph	0.812771	0.12	0	1.2208	2.1795	0	1.7371	1.3697
Q8VE37	RCC1	Rcc1	0.816978	-0.0647	24.706	43.869	43.848	50.609	26.3	31.209
P51881	ADT2	Slc25a5	0.812553	-0.101	133.68	331.8	197.31	281.48	104.12	241.89
Q64105	SPRE	Spr	0.816283	-0.0931	31.887	52.754	88.724	94.092	31.76	41.154
Q9JLJ2	AL9A1	Aldh9a1	0.824523	-0.0807	41.017	28.201	50.934	39.727	28.807	43.526
Q9CQW2	ARL8B	Arl8b	0.829801	0.151	2.1982	0	4.7379	2.3947	2.1298	1.9267
Q7TMD7	DSG4	Dsg4	0.826038	-0.174	1.8585	1.1465	4.0552	3.3811	2.8561	0
Q3TLP5	ECHD2	Echdc2	0.833283	0.267	3.5393	0	6.2039	16.06	0.68517	2.3941
Q6NV99	Q6NV99	Haus6	0.822296	0.151	1.2962	6.2167	1.6825	2.1912	3.7219	2.2745
Q9QUR7	PIN1	Pin1	0.823846	0.187	4.041	0	5.1016	3.9581	2.4353	2.1722
P62137	PP1A	Ppp1ca	0.832402	-0.11	46.741	23.38	93.731	55.364	38.021	38.748
Q9QYS9	QKI	Qki	0.828354	0.0776	5.173	7.9829	12.553	14.451	5.0493	8.3484
P62075	TIM13	Timm13	0.830691	0.209	4.352	0	7.7577	5.6414	1.5054	4.2288
Q3UHX9	SPOUT	D2Wsu81e	0.837936	0.141	0	2.5169	2.5164	3.2817	0	2.6419
Q99020	ROAA	Hnrnpab	0.835167	0.132	44.52	14.437	71.865	42.803	29.335	48.455
Q505F5	LRC47	Lrrc47	0.842363	0.143	7.6389	3.1615	22.566	16.701	6.3058	6.9709
Q8K4B0	MTA1	Mta1	0.8378	-0.0535	5.6746	9.5533	8.7657	8.5455	6.1161	8.1341
Q8VCB1	NDC1	Ndc1	0.839998	-0.0867	1.0745	1.045	1.9213	2.4617	0.71348	1.0257
Q9DCS9	NDUBA	Ndufb10	0.846335	-0.234	0.71159	0	6.1628	5.949	0.26722	1.168
Q3UM45	PP1R7	Ppp1r7	0.840962	-0.0534	6.2142	7.2965	10.703	9.453	6.7847	6.7712
Q3UUY6	PROM2	Prom2	0.839329	-0.518	69.373	73.996	0	68.256	38.27	0
Q8BJY1	PSMD5	Psmd5	0.845578	-0.0711	23.233	24.656	28.318	34.206	13.274	30.818
Q9WU56	PUS1	Pus1	0.846314	-0.0635	1.0227	1.2385	2.2625	1.3652	1.476	1.2463
Q9ERU9	RBP2	Ranbp2	0.841597	-0.131	10.703	4.8162	3.8327	5.9465	6.5072	3.8885
P68368	TBA4A	Tuba4a	0.843777	0.145	15.096	33.477	30.226	102.92	11.581	17.316
Q6PDY2	AEDO	Ado	0.859085	-0.0687	2.9546	3.3767	2.1609	3.2292	2.1094	2.7434
Q4VAA2	CDV3	Cdv3	0.848465	0.207	7.7187	0	10.318	4.7244	3.4574	5.1632
Q9DCT8	CRIP2	Crip2	0.849243	-0.106	1.0555	0	2.4155	1.2771	0	1.8615
Q99LD8	DDAH2	Ddah2	0.85866	0.0485	2.2681	2.8808	4.2122	4.4065	2.2537	3.0657
P84089	ERH	Erh	0.854365	0.0588	37.619	36.563	43.704	39.557	34.098	50.369
Q8R1F1	NIBA2	Fam129b	0.85479	0.045	1.7488	2.6742	3.2338	2.9209	2.2129	2.5691
Q91WJ8	FUBP1	Fubp1	0.853662	-0.0638	151.86	121.05	145.19	154.48	124.9	121.15
Q922H4	GMPPA	Gmppa	0.851124	0.0673	3.8261	4.2503	5.6689	3.7736	5.2319	5.3706
Q8R0F6	ILKAP	Ilkap	0.855915	-0.0982	3.4946	1.7347	2.9884	1.8339	3.1358	2.5683
P50096	IMDH1	Impdh1	0.851697	0.0676	4.3979	6.1795	6.0366	5.3509	3.9607	8.91
A2BE28	LAS1L	Las1l	0.857925	0.152	0.81284	0.77682	6.6006	3.0801	0.74087	2.5074
Q9D071	MMS19	Mms19	0.854705	0.135	1.8558	5.0524	0	3.3559	2.3663	1.4586
Q5F2E7	NUFP2	Nufip2	0.848724	-0.0681	6.0133	16.76	10.226	11.222	7.7496	10.285
Q9DAE2	Q9DAE2	Rbmxl2	0.852281	0.179	0.82227	0	7.0043	0	2.3273	2.8479
Q921L3	TMCO1	Tmco1	0.858425	0.114	1.6801	0	0.66495	1.6817	0	0.97715
Q91YP3	DEOC	Dera	0.867775	-0.173	1.6652	0	7.0267	5.5805	1.6168	0
Q99PU8	DHX30	Dhx30	0.868164	0.155	0.71503	1.1289	4.2264	1.5918	4.749	0
P97376	FRG1	Frg1	0.866656	0.0592	2.3768	2.7815	4.8514	5.2662	1.9208	3.5863
P70349	HINT1	Hint1	0.862614	-0.0454	27.081	37.376	35.999	36.134	26.989	33.995
Q8K3X4	I2BPL	Irf2bpl	0.868844	-0.0634	7.6325	18.411	20.375	12.472	10.02	20.08
Q7TQ95	LNP	Lnp	0.864146	0.0801	0	0	1.4264	1.9217	0	0.61625
Q9JHW2	NIT2	Nit2	0.870141	0.0462	10.136	19.239	23.206	24.01	13.317	15.579
O70310	NMT1	Nmt1	0.862061	0.0652	17.412	11.333	21.321	17.902	15.898	16.93
Q9CQF3	CPSF5	Nudt21	0.873026	0.0676	24.911	16.742	16.799	22.647	18.626	19.118
P62307	RUXF	Snrpf	0.870638	0.0987	1.9796	0	2.7196	2.7303	1.2117	1.3762
Q9CQN1	TRAP1	Trap1	0.86471	-0.048	35.464	53.543	69.811	70.381	32.761	52.031
Q9D883	U2AF1	U2af1	0.864176	0.101	4.7439	26.527	15.501	10.262	12.568	18.643
Q9DCX2	ATP5H	Atp5h	0.876106	0.0505	4.8725	5.6298	10.948	9.4036	6.3571	5.5798
O54825	BYST	Bysl	0.876281	-0.138	0.823	5.7215	12.766	3.6456	1.9074	6.4889
Q9WU84	CCS	Ccs	0.881849	-0.0598	1.9382	1.5905	4.623	2.7073	1.7109	2.717
Q8BFS6	CPPED	Cpped1	0.878501	0.107	0	0.54493	3.5026	1.1696	1.5019	0.82197
P97314	CSRP2	Csrp2	0.882443	-0.0728	6.5123	3.1647	8.9071	5.4481	5.9803	4.8424
Q8BMF4	ODP2	Dlat	0.876451	-0.135	7.6391	14.199	45.705	50.578	4.4472	16.645
Q9D0R8	LSM12	Lsm12	0.877123	-0.075	3.0779	1.4836	3.1948	2.1881	1.7974	3.174
P61514	RL37A	Rpl37a	0.874206	-0.176	14.749	2.1019	4.0867	2.5288	2.3999	14.466
Q9CZ28	SNF8	Snf8	0.875241	0.0776	0	1.4221	1.6585	1.8875	1.4249	0
P63280	UBC9	Ube2i	0.880928	-0.0381	11.402	18.287	18.544	20.094	12.213	14.556
Q9JKB1	UCHL3	Uchl3	0.874489	0.0968	2.7063	2.4937	6.7948	10.015	1.6994	3.2952
Q3TWF6	WDR70	Wdr70	0.883679	0.0911	0.77762	3.8444	5.4645	4.8264	1.9132	2.1381
Q8QZV7	INT13	Asun	0.887558	-0.0885	1.216	0	3.0202	0	1.6161	1.4996
Q6PA06	ATLA2	Atl2	0.88896	-0.143	0.67602	4.3565	0	5.5193	0	0
P48758	CBR1	Cbr1	0.896619	0.0393	10.808	19.292	22.916	18.817	18.72	14.719
O88696	CLPP	Clpp	0.898993	0.144	2.2871	0	9.0459	8.7747	0.71396	3.0679
P08122	CO4A2	Col4a2	0.894641	-0.0368	0.63046	0.64825	0.8817	0	0.6165	0
Q5SUQ9	CTC1	Ctc1	0.892351	-0.0378	0	0.61191	0.93799	0	0	0
Q00PI9	HNRL2	Hnrnpul2	0.89667	-0.0687	1.9886	6.4124	10.355	6.6978	5.3967	3.1666
Q6ZQ88	KDM1A	Kdm1a	0.896595	-0.0481	7.9	8.677	20.434	10.709	11.433	10.352
O35344	IMA4	Kpna3	0.89037	-0.0461	14.351	13.872	26.608	15.687	15.965	19.216
Q8CE90	MP2K7	Map2k7	0.896955	0.0484	1.1926	2.1315	1.5483	2.4026	1.6199	1.1183
Q6ZQI3	MLEC	Mlec	0.898467	-0.0644	2.0598	5.9157	4.6556	6.2414	1.6089	4.9414
P23249	MOV10	Mov10	0.888178	-0.0757	4.4658	13.786	14.826	7.4097	14.664	7.1765
Q9CZ44	NSF1C	Nsfl1c	0.898671	-0.0431	55.193	44.452	62.002	74.57	36.757	50.742
O08807	PRDX4	Prdx4	0.888679	0.0514	186.02	125.12	258.73	204.26	160.89	203.92
P29351	PTN6	Ptpn6	0.88985	-0.0881	2.4991	3.3388	0	2.0897	1.5816	1.9597
Q9WUD1	CHIP	Stub1	0.891066	0.154	2.3597	0	7.8064	6.0812	0	4.8437
Q8BZA9	TIGAR	Tigar	0.893394	-0.0727	10.792	5.6494	25.265	14.593	9.8905	9.1748
Q9CPN9	Q9CPN9	2210010C04Rik	0.902273	-0.129	1.4956	0	8.3198	5.6725	0	1.9505
Q3UHJ0	AAK1	Aak1	0.90124	-0.066	0	2.0909	1.2741	1.6367	1.3769	0
Q9WTQ5	AKA12	Akap12	0.912473	0.0525	41.849	22.676	30.254	52.096	23.532	26.118
Q9DBF1	AL7A1	Aldh7a1	0.911167	-0.0466	4.0929	5.9459	6.6992	3.6212	5.1383	7.952
Q99PT1	GDIR1	Arhgdia	0.904671	0.107	86.806	20.538	269.57	120.44	56.55	88.208
Q8R180	ERO1A	Ero1l	0.901251	0.0752	0	3.9561	3.4284	2.518	1.4729	2.5877
Q9DCW4	ETFB	Etfb	0.910949	-0.041	21.561	52.748	54.282	62.753	23.785	37.982
Q921I9	EXOS4	Exosc4	0.909216	0.125	1.237	14.465	11.781	19.89	1.5659	8.7853
Q8C3I8	HGH1	Hgh1	0.907865	0.0819	1.9385	0	0	1.783	1.418	0.58369
Q9Z130	HNRDL	Hnrnpdl	0.913641	0.0409	5.0864	3.7612	9.6538	6.9562	5.1846	5.575
P06151	LDHA	Ldha	0.914628	-0.0337	338.76	656.74	1009.4	803.05	466.12	559.36
Q9Z1B5	MD2L1	Mad2l1	0.914695	0.0698	14.483	11.914	4.4672	10.937	9.3932	8.6758
Q99KQ4	NAMPT	Nampt	0.905348	-0.0781	5.2883	38.755	14.052	11.449	14.425	14.825
P17918	PCNA	Pcna	0.913564	-0.0289	129.29	220.4	299.79	231.72	178.19	194.83
P52431	DPOD1	Pold1	0.907227	-0.0507	1.8779	5.3524	7.2077	6.6748	3.2139	3.039
Q9EP69	SAC1	Sacm1l	0.914055	0.0842	1.475	14.413	4.384	9.7028	3.4574	3.3102
Q9JJ11	TACC3	Tacc3	0.908124	0.064	0.96948	0.85197	3.7438	1.8192	0.91684	2.1179
Q6ZWY8	TYB10	Tmsb10	0.905692	-0.058	0.45921	1.3914	0	1.5358	0.39897	0.8616
Q6NV83	SR140	U2surp	0.903407	0.0898	0.57388	5.6019	2.164	3.6583	1.2482	1.8364
P61079	UB2D3	Ube2d3	0.905089	-0.0543	4.0896	8.5341	19.694	9.0671	9.0345	7.4951
P61965	WDR5	Wdr5	0.901877	0.0897	6.0318	2.1772	16.654	8.0209	3.9381	8.3433
Q8K354	CBR3	Cbr3	0.920422	-0.0422	1.7121	4.4325	4.839	4.9541	1.6836	4.0333
P11087	CO1A1	Col1a1	0.918794	-0.11	77.537	78.564	17.393	15.092	81.151	68.808
Q922P9	GLYR1	Glyr1	0.92095	0.0414	0.48929	0	1.0111	0.51205	0.64224	1.1294
Q99KR3	LACB2	Lactb2	0.920116	-0.0309	11.428	24.055	20.661	16.756	16.309	19.489
Q8CGK3	LONM	Lonp1	0.91669	-0.0398	12.788	8.7876	17.92	16.317	8.1205	13.992
Q9JI48	PLAC8	Plac8	0.918357	-0.126	4.0349	8.6447	0	7.0511	0	5.9827
Q8BG32	PSD11	Psmd11	0.918501	0.0389	57.793	59.486	128.18	124.82	46.401	82.498
Q60854	SPB6	Serpinb6	0.924829	-0.0244	13.859	16.414	19.34	19.713	14.053	15.094
P53986	MOT1	Slc16a1	0.919058	-0.0484	6.8562	16.603	5.9814	10.199	6.6028	9.1427
P51912	AAAT	Slc1a5	0.91713	0.128	2.0283	0	6.0569	13.983	0.82435	0.95762
Q6ZPR5	NSMA3	Smpd4	0.927932	-0.0485	1.9613	2.3835	0	1.7285	1.3158	1.7321
Q9D1D4	TMEDA	Tmed10	0.928547	0.0682	6.4367	1.3423	6.3195	3.283	4.5802	4.1842
Q6P2B1	TNPO3	Tnpo3	0.924809	0.0887	0	4.5947	11.294	4.4471	4.4609	1.9036
Q4VBE8	WDR18	Wdr18	0.918669	0.0532	5.5881	7.5644	12.17	4.6614	9.7856	12.598
O88967	YMEL1	Yme1l1	0.915891	-0.0574	1.1547	0.83295	0	2.1523	0	0
Q9Z2N8	ACL6A	Actl6a	0.932584	0.0217	27.248	46.736	56.569	51.214	37.047	39.718
P08226	APOE	Apoe	0.929856	-0.039	27.093	15.695	42.309	24.376	25.408	26.785
Q9D1Q6	ERP44	Erp44	0.938661	0.0656	0	0	5.4153	2.9389	0	1.4844
Q8VDM6	HNRL1	Hnrnpul1	0.937898	-0.0427	0	0	2.7436	1.2457	0	1.4165
P62774	MTPN	Mtpn	0.943991	-0.044	6.1441	1.9037	6.8147	6.2572	2.4502	4.7441
P97300	NPTN	Nptn	0.931251	0.0372	1.7939	1.4973	1.2914	2.467	0.961	1.5809
P97371	PSME1	Psme1	0.939623	-0.0284	2.2579	3.8921	7.478	3.5826	3.5405	4.8834
Q08297	RAD51	Rad51	0.934183	0.0886	1.6049	0	8.125	6.2281	0	2.9239
Q921J2	RHEB	Rheb	0.929974	-0.034	1.0064	0.72473	1.724	1.1926	0.74844	1.3126
Q8BP67	RL24	Rpl24	0.940049	0.0279	108.33	75.731	173.24	125.44	104.48	114.91
Q8K4L3	SVIL	Svil	0.934205	-0.119	4.4875	5.3894	0.34414	0	1.0934	6.8384
P83741	WNK1	Wnk1	0.938478	0.0852	7.0776	3.5829	0	1.3213	3.3165	6.4397
P04627	ARAF	Araf	0.947311	-0.0434	1.1368	2.4332	0	1.9705	1.9176	0
O88545	CSN6	Cops6	0.955738	-0.0499	0	0	5.0972	3.7017	0	0.87246
Q9CZ04	CSN7A	Cops7a	0.954547	-0.0491	2.7768	0	7.6914	2.8113	1.4854	3.181
Q62426	CYTB	Cstb	0.951532	0.05	4.1367	0	4.5354	2.796	1.7355	2.9546
Q3U308	CTU2	Ctu2	0.951534	0.0361	0	4.0686	2.9994	2.4917	1.4251	2.2418
Q9CWX9	DDX47	Ddx47	0.952267	0.0297	15.341	10.497	29.805	28.426	8.7659	20.488
P53798	FDFT	Fdft1	0.945169	0.0231	0.85298	2.0855	2.5653	2.0509	1.2039	1.9392
E9Q368	TARB1	Gm17296	0.955626	-0.0193	0.74619	0	1.4676	0	0.77643	1.0748
Q99JY0	ECHB	Hadhb	0.945836	-0.0303	2.7451	10.313	10.952	6.7138	5.3985	8.032
Q8BP00	IQCB1	Iqcb1	0.947429	-0.027	0.56668	1.5946	0.83643	0	0.72896	1.1287
Q9CYR6	AGM1	Pgm3	0.957733	0.0575	0	10.452	11.664	4.0209	2.2613	9.1433
Q91VA6	PDIP2	Poldip2	0.947286	0.0519	0	3.2185	5.4815	1.2765	2.821	3.3023
Q9D1J3	SARNP	Sarnp	0.953746	0.0226	42.281	37.419	30.625	46.762	33.094	32.816
Q9WTX5	SKP1	Skp1	0.945418	-0.0313	1.0662	0	1.6489	1.2724	0	1.5038
Q9D0C4	TRM5	Trmt5	0.950609	0.0418	1.4626	0.80572	2.3432	2.2802	2.1184	0
Q922F4	TBB6	Tubb6	0.946438	0.0215	4.1073	5.8904	4.5609	5.1249	4.9127	4.5827
P70362	UFD1	Ufd1l	0.955352	-0.0428	2.6332	0.63713	4.0259	1.4505	1.7693	2.4077
P27641	XRCC5	Xrcc5	0.955798	0.0244	15.133	13.831	14.768	10.966	13.231	22.413
Q9CQU5	ZWINT	Zwint	0.948948	-0.038	0	2.8449	3.9315	1.9919	2.1752	1.4435
P14094	AT1B1	Atp1b1	0.97176	0.0176	15.171	10.358	42.569	26.039	15.25	17.472
O70305	ATX2	Atxn2	0.960742	-0.0303	2.0277	0	3.0485	2.4387	1.2025	1.3633
P70698	PYRG1	Ctps1	0.971923	0.0173	16.622	11.786	47.598	23.18	20.123	20.721
A2ADY9	DDI2	Ddi2	0.95956	-0.0486	7.1957	10.513	1.9459	9.1428	1.6011	9.0886
O88986	KBL	Gcat	0.960002	0.0611	1.8916	0	9.6442	10.291	0	2.338
O88844	IDHC	Idh1	0.960416	0.0293	19.18	9.3561	42.221	24.228	23.382	14.215
Q8C1D8	IWS1	Iws1	0.960538	-0.0287	0	0	2.5733	1.31	0.49181	1.5682
Q61166	MARE1	Mapre1	0.971821	-0.0171	26.158	15.393	46.238	23.69	30.359	24.984
Q8VCB2	MED25	Med25	0.973013	0.0257	2.5124	0.59215	3.8965	2.8132	1.6099	1.3503
Q3THE2	ML12B	Myl12b	0.963834	0.0377	1.6214	0	4.4839	0	2.3837	2.6162
O09000	NCOA3	Ncoa3	0.966769	0.0428	1.6787	0.2133	2.755	1.3953	1.2393	0
P70296	PEBP1	Pebp1	0.9618	-0.015	14.447	17.171	16.482	18.146	10.886	20.062
P67778	PHB1	Phb	0.973845	-0.0092	88.969	135.03	200.41	187.94	95.798	131.19
P17742	PPIA	Ppia	0.968516	-0.0259	632.23	263.82	1691.6	635.02	638.8	659.13
Q9R1P3	PSB2	Psmb2	0.962235	-0.0309	11.111	4.6884	31.285	12.791	9.5883	12.46
Q99L47	F10A1	St13	0.972606	-0.0117	105.41	77.721	112.93	109.35	80.205	102.96
P70324	TBX3	Tbx3	0.960557	-0.0309	1.8839	0	1.5875	1.7504	0	1.8613
Q6A4J8	UBP7	Usp7	0.964365	0.0207	2.7337	6.536	5.3336	6.2109	6.0157	2.6627
Q9JMD0	ZN207	Znf207	0.972234	0.0133	6.925	4.3645	7.7177	7.2879	4.5464	7.238
Q80UG5	2025-09-09	2025-09-09	0.98807	-0.00641	4.6862	18.904	12.697	12.114	8.0526	11.378
P54923	ADPRH	Adprh	0.983523	-0.0122	5.6271	10.526	3.4527	11.167	3.8155	4.6794
Q8CJG0	AGO2	Ago2	0.984925	-0.00573	6.0912	6.9197	6.2118	7.5513	5.6157	6.1011
Q8C0I1	ADAS	Agps	0.985114	-0.00853	0.91475	2.0427	3.8534	1.9825	2.3708	1.505
Q9D7N9	APMAP	Apmap	0.988407	0.00927	1.3666	3.3309	0	1.1523	1.6298	2.3035
Q80XN0	BDH	Bdh1	0.984216	-0.0249	0.75149	0	6.9567	9.2491	0	0
Q9DBP5	KCY	Cmpk1	0.976776	-0.0145	7.2274	3.6028	13.416	8.5577	5.8902	6.7245
Q8K0V4	CNOT3	Cnot3	0.982155	0.0189	3.0032	0.85783	7.5026	5.9798	1.4464	2.3245
P47941	CRKL	Crkl	0.976282	-0.0234	1.4357	0	4.2924	3.3103	0	2.0598
Q61578	ADRO	Fdxr	0.981746	0.00921	1.1988	1.1942	1.4824	1.0838	1.7108	1.1667
E9Q5G3	KIF23	Kif23	0.979392	0.0148	1.0299	1.4802	5.126	1.9941	2.7549	1.4668
Q60793	KLF4	Klf4	0.974365	0.0212	1.9002	0	1.9325	2.2817	0	1.9537
Q5XJE5	LEO1	Leo1	0.987441	0.00915	6.3847	1.994	5.6916	4.6445	3.887	4.0908
Q922Q8	LRC59	Lrrc59	0.988561	-0.0142	28.456	7.1014	115.62	49.409	14.206	32.32
Q9JKX6	NUDT5	Nudt5	0.97592	0.0161	12.424	6.5324	25.067	13.77	8.556	17.854
Q7TQI3	OTUB1	Otub1	0.985248	0.00675	2.3881	5.1371	8.9069	5.9223	3.5216	5.3133
Q61171	PRDX2	Prdx2	0.981031	0.00689	147.08	190.45	177.49	176.61	142.58	200.29
Q9Z2U1	PSA5	Psma5	0.985845	-0.00541	34.468	39.99	57.123	67.376	28.909	39.972
Q9EP71	RAI14	Rai14	0.981562	0.0222	2.7625	0	3.6048	3.8594	2.9852	0
P48962	ADT1	Slc25a4	0.976358	-0.0264	1.8562	11.757	5.8109	11.126	1.2592	8.5678
Q8BTI8	SRRM2	Srrm2	0.988222	0.00497	18.913	31.203	22.275	25.771	25.121	20.516
Q8CG72	ADPRS	Adprhl2	0.9932	-0.00304	1.8424	1.3839	2.934	2.7601	1.495	1.8015
O35841	API5	Api5	0.999929	-2.86e-05	26.554	32.195	27.378	41.788	21.542	25.999
Q11011	PSA	Npepps	0.99001	-0.00473	36.225	25.031	56.965	42.97	35.72	33.323
O35129	PHB2	Phb2	0.995754	0.00146	83.362	137.35	137.42	169.16	88.024	105.99
Q9CX56	PSMD8	Psmd8	0.998841	-0.00196	0.78692	51.777	6.6442	5.9173	4.7266	9.6398
Q8R4X3	RBM12	Rbm12	0.993796	0.00252	0.80181	1.9009	2.2984	1.8884	1.393	1.3387
Q9D8S4	ORN	Rexo2	0.993347	-0.00358	1.1029	0.61451	0	0	0.81933	0.88141
Q8K0H5	TAF10	Taf10	0.99589	0.00259	2.8286	1.2367	3.7248	3.1852	2.0624	1.9942
Q9CXF4	TBC15	Tbc1d15	0.998309	-0.00102	3.6427	1.7599	4.7136	2.9058	2.9036	3.5739
Q9QY76	VAPB	Vapb	0.9999	4.7e-05	2.5544	2.3136	5.2579	3.0708	2.38	4.2521
