# Supplementary material for: GABPA Recruits the Integrator Endonuclease Complex to Promote Transcription Elongation
Source: Research Square preprint supplement (doi:10.21203/rs.3.rs-7297262/v1), 2025-09-19
Supplement: Supplementary file 2 [file 718ef342c3c8fc00907835a6.xlsx]

## Sheet: SLAM_mESC_Gabpa_12h
Table S3. Differentially expressed genes of SLAM-seq in mESCs with GABPA degradation for 12 hours (dTAG vs DMSO).
Gene_id	Gene_name	log2FoldChange	padj	SLAM_mESC_Gabpa_12h_DMSO_rep1_Nascent_RPKM	SLAM_mESC_Gabpa_12h_DMSO_rep2_Nascent_RPKM	SLAM_mESC_Gabpa_12h_dTAG_rep1_Nascent_RPKM	SLAM_mESC_Gabpa_12h_dTAG_rep2_Nascent_RPKM	SLAM_mESC_Gabpa_12h_DMSO_rep1_Total_RPKM	SLAM_mESC_Gabpa_12h_DMSO_rep2_Total_RPKM	SLAM_mESC_Gabpa_12h_dTAG_rep1_Total_RPKM	SLAM_mESC_Gabpa_12h_dTAG_rep2_Total_RPKM
ENSMUSG00000031917	Nip7	-3.66562	8.68863e-64	39.0683	36.1895	4.30689	3.69696	120.698	114.793	14.1822	13.5332
ENSMUSG00000026377	Nifk	-3.87471	2.12792e-57	5.38894	5.1509	0.522022	0.441506	16.483	16.0176	1.64219	1.46603
ENSMUSG00000028187	Rpf1	-4.85925	2.66702e-55	2.24496	2.12805	0.0821205	0.131511	7.96661	7.34808	0.38744	0.464673
ENSMUSG00000022814	Umps	-4.43336	6.07882e-55	3.49993	3.29036	0.241906	0.171562	19.573	18.2117	1.54448	1.10132
ENSMUSG00000030127	Cops7a	-4.82558	3.2548e-50	4.46593	4.08164	0.237765	0.152306	44.463	44.3506	2.28162	1.52306
ENSMUSG00000028729	Ebna1bp2	-4.55217	8.24712e-44	3.60843	3.24742	0.186775	0.213863	39.0913	34.9077	1.76969	1.44844
ENSMUSG00000030264	Thumpd3	-3.93801	2.60869e-43	1.68126	1.69381	0.172897	0.116906	7.32509	7.15251	0.771385	0.799886
ENSMUSG00000029649	Pomp	-4.72307	7.57903e-42	1.66886	1.33056	0.0855515	0.0636097	21.3308	19.5747	2.64395	2.80731
ENSMUSG00000050621	Rps27rt	-3.36652	1.14853e-41	151.949	158.76	16.6399	25.0294	1605.05	1755.11	771.361	930.987
ENSMUSG00000106496	Gm7733	-4.4105	3.60459e-41	24.2278	24.2833	1.63092	1.40243	99.7651	102.377	8.04822	6.12641
ENSMUSG00000047084	Ngrn	-5.23345	1.54632e-40	4.1613	5.0749	0.156648	0.179367	12.0776	12.4252	0.900729	0.896836
ENSMUSG00000005779	Psmb4	-3.95954	1.05098e-39	8.39045	9.57806	0.829052	0.709307	127.177	124.315	16.9785	15.9594
ENSMUSG00000033970	Rfc3	-4.02121	6.36769e-37	3.3171	2.78494	0.287936	0.207808	11.263	9.896	0.967466	0.871196
ENSMUSG00000018848	Rars	-3.99859	7.2503e-37	0.923619	0.948601	0.0910415	0.0623135	8.61598	8.37711	1.17356	0.908738
ENSMUSG00000021737	Psmd6	-3.31422	2.72934e-35	3.48619	3.52245	0.488133	0.461923	36.0923	32.3206	4.5633	3.70308
ENSMUSG00000027804	Ppid	-3.69428	2.72934e-35	2.42918	1.94817	0.227649	0.231457	18.3301	17.0022	1.83443	1.83512
ENSMUSG00000021576	Pdcd6	-3.47009	3.63139e-35	2.02544	1.91609	0.247752	0.231382	12.8485	12.0591	1.61386	1.32562
ENSMUSG00000074797	Itpa	-4.62065	4.09105e-33	1.14034	1.15515	0.0721221	0.0484352	8.66489	8.46292	0.672364	0.557004
ENSMUSG00000038510	Rpf2	-3.60682	7.82224e-33	0.940771	0.916313	0.105455	0.0997928	4.61811	4.31632	0.475233	0.575947
ENSMUSG00000021891	Mettl6	-4.7262	9.0468e-33	0.809266	0.833944	0.0546514	0.0221234	2.45496	2.45639	0.171545	0.170666
ENSMUSG00000079511	Gm42688	-5.15424	1.04353e-31	1.75776	1.59912	0.0626368	0.0652009	13.2287	11.7659	0.634198	0.70906
ENSMUSG00000028409	Smu1	-2.84129	1.34709e-31	2.37157	2.20813	0.458678	0.402902	18.5037	16.9057	3.26865	2.62045
ENSMUSG00000024007	Ppil1	-3.14922	2.17757e-31	3.44474	3.50194	0.620789	0.420665	20.5639	19.61	2.90432	1.92087
ENSMUSG00000030037	Mrpl53	-5.31693	3.29479e-31	16.0611	14.3421	0.506845	0.527593	120.07	106.004	4.38059	3.84389
ENSMUSG00000021149	Gtpbp4	-2.68208	2.09071e-30	1.53782	1.83368	0.343865	0.369341	6.58616	6.94329	1.42584	1.26762
ENSMUSG00000079478	Znrd2	-5.0634	2.92255e-30	8.76331	9.98932	0.432919	0.284616	65.9897	66.8362	3.2355	3.13077
ENSMUSG00000028798	Eif3i	-3.48115	2.99154e-30	2.22707	2.54853	0.288742	0.288852	45.8562	44.705	13.0497	12.569
ENSMUSG00000011114	Tbrg1	-3.13442	4.96939e-30	3.05406	3.03281	0.445871	0.499825	23.4849	22.7327	4.06238	2.96722
ENSMUSG00000044763	Trmt10c	-2.76338	5.25557e-30	8.10928	7.97059	1.65072	1.54907	13.0867	12.8917	2.93252	2.83778
ENSMUSG00000014873	Surf2	-4.38313	6.30899e-30	3.74119	3.71234	0.213406	0.284342	19.0877	17.9304	2.08285	2.1148
ENSMUSG00000032215	Rsl24d1	-3.3473	8.22016e-30	2.38251	2.36815	0.342008	0.280699	16.8423	17.0808	2.48943	2.10182
ENSMUSG00000063480	Snu13	-2.50453	1.34853e-29	8.69267	8.88018	2.12337	2.07125	51.0107	49.7209	13.9838	12.6864
ENSMUSG00000024844	Banf1	-2.94397	1.88104e-29	15.7518	13.4864	2.69057	2.43889	201.987	182.237	55.7681	52.2888
ENSMUSG00000005846	Rsl1d1	-2.74757	1.9597e-29	9.20249	8.16069	1.9873	1.49257	52.1156	44.7841	10.6283	8.41862
ENSMUSG00000030077	Chl1	4.00926	2.73036e-29	0.00705391	0.0112522	0.138014	0.266662	0.0515665	0.0519516	1.07691	2.09196
ENSMUSG00000073775	Kti12	-5.90667	4.68972e-29	7.33497	9.08597	0.240021	0.0832823	16.6736	17.6789	0.360032	0.208206
ENSMUSG00000081476	Itpa-ps1	-5.72089	9.24005e-29	21.7719	20.6603	0.654932	0.340872	156.504	145.487	5.29404	3.40872
ENSMUSG00000035378	Shq1	-5.29348	1.13398e-28	0.12518	0.113174	0.00379968	0.00461443	0.6225	0.526285	0.0718773	0.129863
ENSMUSG00000031948	Kars	-3.11233	1.1887e-28	1.46359	1.48546	0.24782	0.208648	27.3975	27.226	6.23013	4.58647
ENSMUSG00000006392	Med8	-4.25547	1.40779e-28	2.59512	2.17156	0.197135	0.12628	13.916	13.1807	1.06655	0.82082
ENSMUSG00000042472	Zfp410	-4.08362	1.84794e-28	0.533581	0.52518	0.0400132	0.0454377	1.8697	1.94701	0.849978	1.21924
ENSMUSG00000025439	Clns1a	-3.15455	2.19647e-28	1.21093	1.11589	0.196875	0.151596	13.0549	12.2937	1.79615	1.51876
ENSMUSG00000034259	Exosc4	-3.68408	9.31243e-28	5.88014	5.85749	0.734878	0.454842	23.716	23.3076	2.92958	2.46028
ENSMUSG00000082935	Gm7658	-2.54309	2.62268e-27	44.2332	40.5764	9.4502	10.3802	373.726	341.914	102.706	95.0513
ENSMUSG00000082044	Snrpert	-2.4941	3.44308e-27	188.02	187.938	40.7578	50.5712	1727.49	1819.34	533.822	656.939
ENSMUSG00000020973	Dnaaf2	-4.0727	1.92818e-26	1.45981	1.70085	0.153446	0.0871242	4.00511	4.27976	0.470801	0.646171
ENSMUSG00000029513	Prkab1	-5.72398	7.32473e-26	1.01386	1.01365	0.0298296	0.0186304	3.56985	3.64494	0.244603	0.149044
ENSMUSG00000005354	Txn2	-3.16789	9.34131e-26	2.15442	2.0383	0.378111	0.238097	24.0451	23.1159	4.24558	3.96991
ENSMUSG00000027404	Snrpb	-2.65486	2.4799e-25	7.96755	7.02983	1.82857	1.37081	76.7121	72.6834	17.0443	11.8484
ENSMUSG00000029752	Asns	-2.33058	2.97502e-25	10.5866	10.0393	3.10408	2.43414	107.9	99.6477	35.559	27.6757
ENSMUSG00000021024	Psma6	-2.41986	5.4404e-25	1.55961	1.54343	0.415936	0.366581	14.4026	13.673	3.68536	4.11958
ENSMUSG00000028322	Exosc3	-6.26761	6.57164e-25	0.464147	0.415108	0.00623715	0.010388	2.2895	2.15241	0.127238	0.137641
ENSMUSG00000028932	Psmc2	-2.71696	2.99214e-24	2.96077	2.78394	0.695501	0.472873	18.7284	17.9406	3.37362	2.89589
ENSMUSG00000072582	Ptrh2	-2.71179	3.8807e-24	3.88666	3.68328	0.8537	0.696508	8.88773	8.72747	1.88814	1.90539
ENSMUSG00000027406	Idh3b	-5.26162	4.29673e-24	2.10271	1.83964	0.0870701	0.0388433	36.3357	34.5043	3.40817	2.64135
ENSMUSG00000048911	Rnf24	-2.29496	6.85417e-24	0.998207	1.0076	0.250779	0.308058	8.8967	9.40428	2.87861	3.55319
ENSMUSG00000074305	Peak1	2.61857	8.59365e-24	0.0577644	0.101017	0.652733	0.66507	0.17195	0.240113	1.11968	1.3514
ENSMUSG00000020075	Ddx21	-2.51534	9.45513e-24	1.50008	1.74467	0.393402	0.372559	7.09297	7.85102	2.24801	1.84124
ENSMUSG00000022427	Tomm22	-2.50869	1.64797e-23	13.5389	13.3935	3.29677	3.0979	73.4314	72.1622	17.5614	16.3441
ENSMUSG00000028016	Ints12	-3.28081	2.74576e-23	0.897928	0.910752	0.14293	0.10273	2.10633	1.95033	0.292666	0.322358
ENSMUSG00000028567	Txndc12	-3.34307	3.35293e-23	0.749566	0.725259	0.120734	0.068999	3.51703	2.6968	0.958773	0.946272
ENSMUSG00000028033	Kcnq5	-2.33313	3.41418e-23	0.0912241	0.0818473	0.0231851	0.0234722	0.752133	0.688983	0.240813	0.247361
ENSMUSG00000026577	Blzf1	-4.53608	3.91037e-23	0.566717	0.596709	0.0405214	0.0230074	1.4102	1.43664	0.119722	0.164886
ENSMUSG00000025208	Mrpl43	-2.85047	4.31715e-23	12.9645	14.3243	2.68496	2.3956	48.8968	51.6102	9.28632	7.90129
ENSMUSG00000030717	Nupr1	-2.62835	6.72268e-23	3.48354	3.52665	0.783222	0.748458	21.2688	20.655	8.59832	9.18643
ENSMUSG00000115916	Gm8702	-4.54415	7.4928e-23	29.5869	22.5688	1.48856	1.54949	125.596	104.399	12.6527	13.6011
ENSMUSG00000022313	Utp23	-4.41547	8.63826e-23	1.54922	1.36515	0.108821	0.0660777	3.68243	3.47276	0.308327	0.188793
ENSMUSG00000070610	Gm13127	-4.42221	8.85583e-23	6.2944	8.75601	0.492614	0.439525	63.7413	64.1006	5.79408	2.34414
ENSMUSG00000021486	Prelid1	-2.94565	8.90161e-23	4.15196	4.38707	0.812353	0.66796	50.7638	54.4477	11.8576	10.801
ENSMUSG00000040843	Tiprl	-2.73168	2.9012e-22	1.1086	1.04935	0.242615	0.192155	4.32824	4.0465	1.06539	0.870187
ENSMUSG00000070319	Eif3g	-2.53765	8.58146e-22	9.0531	8.89714	2.36274	1.77716	101.37	94.4734	26.7523	21.5004
ENSMUSG00000021598	Med10	-2.8362	2.14259e-21	1.98964	1.63611	0.382629	0.296864	9.39551	8.66175	1.71351	1.44969
ENSMUSG00000105879	Gm6204	-2.10447	2.18926e-21	155.472	169.469	53.8295	48.2404	1598.21	1651.51	833.038	822.61
ENSMUSG00000113786	Gm49384	-3.22336	3.61399e-21	0.945247	1.01386	0.149038	0.131633	2.98116	3.07338	0.64809	0.86972
ENSMUSG00000005667	Mthfd2	-2.3324	3.9902e-21	3.05009	3.15245	0.945996	0.707926	16.7553	17.2406	6.09499	4.52268
ENSMUSG00000003131	Pafah1b2	-2.72025	4.54814e-21	0.390664	0.462797	0.0889242	0.0857583	0.818757	0.861125	0.324966	0.366174
ENSMUSG00000031916	Cog8	-2.68854	4.96074e-21	2.19673	2.60339	0.55135	0.443484	9.09513	10.0716	2.12082	1.88481
ENSMUSG00000030677	Kif22	-2.87546	5.79972e-21	1.1386	1.21796	0.214376	0.220851	10.026	9.88373	1.75479	1.26989
ENSMUSG00000026281	Dtymk	-2.21393	8.7841e-21	5.41198	4.94672	1.55969	1.46408	38.762	36.4353	13.1425	13.242
ENSMUSG00000031711	Zfp330	-3.66676	8.9645e-21	1.21499	0.972991	0.117316	0.115691	4.63351	4.19636	0.463088	0.507754
ENSMUSG00000019948	Actr6	-3.43941	1.21943e-20	0.585013	0.589914	0.0753454	0.0700862	1.81526	1.75281	0.251686	0.297032
ENSMUSG00000044600	Smim7	-2.23955	1.47366e-20	7.63518	7.3983	2.27489	2.02316	24.6045	22.5449	7.15598	6.47182
ENSMUSG00000039182	AW209491	-2.96208	1.9984e-20	2.11168	1.97579	0.400773	0.295818	3.74757	3.62442	0.823407	0.682658
ENSMUSG00000072692	Rpl37rt	-1.93697	3.37839e-20	11.2272	11.1754	3.87216	4.08146	124.039	132.378	72.4044	85.3227
ENSMUSG00000024587	Nars	-2.13974	3.70583e-20	3.68102	3.82546	1.25112	1.04506	35.1993	34.9217	11.8732	9.26597
ENSMUSG00000027194	Ttc17	-2.99562	5.83982e-20	0.152425	0.137568	0.0224555	0.0275373	0.963522	0.902314	0.125812	0.154337
ENSMUSG00000005505	Kbtbd4	-2.98147	8.60677e-20	2.26814	2.26575	0.421065	0.344732	7.11757	7.37201	2.84337	2.41312
ENSMUSG00000027099	Mtx2	-3.45834	9.55014e-20	0.204886	0.220191	0.0272406	0.0244891	1.78971	1.70375	0.191923	0.212668
ENSMUSG00000014859	E2f4	-2.94975	1.27357e-19	2.10217	2.44121	0.452305	0.325615	15.6907	17.8774	2.16007	1.90088
ENSMUSG00000118125	Gm50387	-3.47461	2.1672e-19	3.98648	4.30342	0.655971	0.29932	29.127	29.2854	3.54045	2.67517
ENSMUSG00000041438	Utp4	-2.34058	2.45177e-19	2.29559	1.99649	0.662654	0.476743	10.9139	10.5239	2.93714	2.22711
ENSMUSG00000026755	Arpc5l	-2.54812	2.73184e-19	2.24178	2.17924	0.550784	0.463818	10.2347	9.79567	2.33619	2.11295
ENSMUSG00000027613	Eif6	-2.7072	3.29479e-19	6.83593	6.17839	1.69482	0.956208	45.4935	42.626	9.54889	6.93251
ENSMUSG00000022407	Adsl	-2.70566	3.35625e-19	0.903219	0.970744	0.219086	0.163112	9.75113	9.33191	1.69901	1.48915
ENSMUSG00000004100	Ppan	-2.63278	4.1578e-19	4.68735	4.85712	1.07416	0.999544	15.5614	17.1217	3.77584	3.21887
ENSMUSG00000027076	Timm10	-2.31731	4.71069e-19	10.4723	11.0386	3.20056	2.59357	30.0399	31.4037	7.53549	7.56985
ENSMUSG00000101431	Gm7901	-3.90665	5.21754e-19	5.62058	5.78354	0.571272	0.424755	80.1116	80.0715	30.9507	15.0363
ENSMUSG00000026927	Entr1	-3.58691	5.27542e-19	1.68193	1.76992	0.235057	0.135355	8.88383	8.74395	1.31532	0.957893
ENSMUSG00000000001	Gnai3	-3.26025	5.27542e-19	0.328419	0.351292	0.0561673	0.0366507	2.8448	2.99041	0.426704	0.371743
ENSMUSG00000026171	Rnf25	-5.00556	5.92044e-19	1.04382	0.95989	0.0511104	0.0266013	3.64955	3.77957	0.332218	0.33695
ENSMUSG00000061848	Gm5805	-2.04402	7.49031e-19	140.603	124.298	44.5871	42.5447	1578.84	1562.66	782.061	828.133
ENSMUSG00000037296	Lsm1	-2.2675	8.52354e-19	2.18636	2.05677	0.655563	0.529949	7.08304	6.67067	1.883	1.90564
ENSMUSG00000057895	Zfp105	-4.57066	9.40007e-19	1.194	0.850757	0.0573282	0.059675	1.85326	1.71593	0.14332	0.1364
ENSMUSG00000050846	Zfp623	-4.08638	1.1241e-18	1.15896	0.943805	0.0964105	0.0642286	1.71085	1.81971	0.339365	0.409457
ENSMUSG00000021569	Trip13	-3.19522	1.22394e-18	0.652572	0.605408	0.11708	0.0615781	4.43132	3.98398	0.553359	0.405389
ENSMUSG00000004788	Eif2b2	-3.29268	1.25367e-18	2.17717	1.7737	0.328199	0.199287	14.5471	12.6888	1.9464	1.41399
ENSMUSG00000106918	Mrpl33	-2.92561	2.06591e-18	0.212578	0.199025	0.0347808	0.0392217	1.97542	1.78527	0.440074	0.564189
ENSMUSG00000032002	Dcun1d5	-2.89932	2.14956e-18	0.607814	0.586133	0.110049	0.105963	4.05538	3.89222	0.822619	0.801881
ENSMUSG00000067722	BC003965	-2.95347	2.51554e-18	4.81812	4.70535	0.932736	0.698189	14.5669	15.094	2.59908	2.1382
ENSMUSG00000027331	Knstrn	-3.5306	2.6241e-18	0.226113	0.269935	0.0301731	0.0271639	2.09921	2.04749	0.222629	0.179961
ENSMUSG00000013822	Elof1	-2.80829	2.64023e-18	4.45783	4.51104	1.01237	0.680928	28.8088	26.7509	4.97621	3.93966
ENSMUSG00000021621	Zcchc9	-3.79457	2.94785e-18	0.766855	0.826664	0.0845703	0.0667831	2.85875	2.75212	0.405354	0.297488
ENSMUSG00000054226	Tprkb	-3.57642	3.22852e-18	0.579065	0.641579	0.0866754	0.0441912	2.7909	2.70335	0.44399	0.342481
ENSMUSG00000104882	Gm43096	-4.66115	3.27223e-18	19.3826	15.9432	0.928728	0.966747	149.661	144.17	12.0735	11.601
ENSMUSG00000053565	Eif3k	-1.982	6.61999e-18	6.60462	5.89922	2.23885	2.04929	64.5631	62.6936	26.8414	27.9725
ENSMUSG00000024640	Psat1	-2.10373	8.11032e-18	0.900389	0.929245	0.303985	0.270316	10.5765	10.4799	4.60865	3.5475
ENSMUSG00000031546	Gins4	-2.28906	9.6218e-18	2.33271	2.61285	0.722818	0.638779	17.7381	17.3913	3.99173	3.63613
ENSMUSG00000060510	Zfp266	-2.8577	1.04888e-17	0.592816	0.670568	0.137256	0.0926757	1.24314	1.26929	0.352414	0.352682
ENSMUSG00000062937	Mtap	-3.03842	1.10659e-17	0.302303	0.262308	0.0444716	0.0493783	2.23943	2.18329	0.40988	0.398112
ENSMUSG00000009640	Dmap1	-5.02136	1.28615e-17	0.982567	0.944429	0.0214559	0.0714694	6.37901	6.08968	0.266053	0.294811
ENSMUSG00000024258	Polr2d	-2.04353	1.42864e-17	6.01175	5.68893	2.0043	1.83455	23.3284	22.9611	7.57229	6.39395
ENSMUSG00000035171	1110059E24Rik	-2.24581	1.42864e-17	0.36137	0.362074	0.0966932	0.11152	1.50801	1.38675	0.352272	0.39032
ENSMUSG00000033285	Wdr3	-4.00003	1.42864e-17	0.406569	0.362282	0.043035	0.0167988	3.64228	3.51627	0.414212	0.503963
ENSMUSG00000037965	Zc3h7a	2.20816	1.63785e-17	0.714629	1.14731	6.41474	5.16735	11.9993	22.6334	159.63	159.934
ENSMUSG00000105617	Gm43809	-2.69157	2.55296e-17	0.167031	0.145285	0.0291597	0.0374574	1.38175	1.25513	0.3403	0.440447
ENSMUSG00000024926	Kat5	-3.25176	2.71233e-17	1.41197	1.60416	0.239049	0.17841	5.78505	5.80514	1.19976	0.957781
ENSMUSG00000047454	Gphn	1.95356	3.1655e-17	0.0344585	0.0410495	0.208124	0.187491	1.1356	1.97851	34.1623	36.4481
ENSMUSG00000027531	Impa1	-2.98437	4.30901e-17	0.559408	0.683097	0.10201	0.111408	4.96587	4.91124	0.807716	0.69978
ENSMUSG00000029465	Arpc3	-3.98039	4.32422e-17	0.316162	0.491208	0.0248312	0.0486545	5.98356	6.8049	1.30145	1.46267
ENSMUSG00000042729	Wdr74	-2.33061	5.55469e-17	7.6654	7.12621	2.30892	1.62585	45.9438	41.3942	13.772	10.6741
ENSMUSG00000047710	Champ1	-2.73899	6.84666e-17	1.29698	1.65426	0.342149	0.24309	2.38022	3.07425	0.744038	0.633165
ENSMUSG00000034152	Exoc3	-5.15589	8.7735e-17	0.206441	0.143257	0.00747219	0.00518538	1.34409	1.35655	0.0597775	0.0829661
ENSMUSG00000032309	Fbxo22	-2.39987	1.09237e-16	1.65362	1.70156	0.493712	0.354279	8.83557	9.08114	2.0967	1.59207
ENSMUSG00000035202	Lars2	1.97483	1.16602e-16	0.246563	0.372709	1.62608	1.66785	11.5671	21.0455	217.057	265.84
ENSMUSG00000037017	Zscan21	-2.77832	1.34837e-16	0.859371	0.835927	0.187657	0.140644	2.16857	2.16416	0.583613	0.609458
ENSMUSG00000021890	Eaf1	-3.29328	1.40116e-16	0.569289	0.857186	0.105378	0.0877535	1.64378	1.93331	0.339317	0.351014
ENSMUSG00000036751	Cox6b1	-2.08816	1.56717e-16	3.47546	3.2108	1.03104	1.10975	68.8569	64.3581	38.1273	41.9953
ENSMUSG00000062822	4833420G17Rik	-2.85011	1.62369e-16	0.534117	0.562556	0.110223	0.0929504	1.71966	1.71469	0.347413	0.325326
ENSMUSG00000041231	Ublcp1	-5.88758	1.8873e-16	0.442782	0.403394	0.0102282	0.00851751	2.21025	2.22947	0.274115	0.310889
ENSMUSG00000039233	Tbce	-3.43327	2.08887e-16	0.236276	0.198154	0.0257912	0.0292876	1.24709	1.06921	0.350135	0.312401
ENSMUSG00000024953	Prdx5	-4.05161	2.19199e-16	2.25624	1.98518	0.181547	0.15914	23.5538	21.4164	5.14064	4.61506
ENSMUSG00000080840	Gm11349	-4.83594	2.35015e-16	5.06609	7.71081	0.408746	0.121565	45.2815	44.26	3.7955	1.94504
ENSMUSG00000020523	Fam114a2	-3.39602	2.64614e-16	0.238871	0.272148	0.0356697	0.0285614	2.43289	2.40263	0.503034	0.367491
ENSMUSG00000090553	Snrpe	-2.12791	2.90491e-16	4.47517	4.17241	1.26353	1.43675	47.3388	48.827	16.634	21.9843
ENSMUSG00000004642	Slbp	-2.05181	3.68194e-16	4.36576	4.11472	1.59744	1.15474	11.0963	10.1468	3.70147	2.90225
ENSMUSG00000004096	Cwc15	-2.69859	3.77125e-16	1.48041	1.56077	0.356544	0.265586	15.2254	13.8338	2.20468	2.31537
ENSMUSG00000113660	Gm5626	-3.11018	4.12497e-16	10.5224	9.10954	1.53983	1.53875	122.247	121.894	22.9743	17.888
ENSMUSG00000041247	Lamp3	-3.83972	4.43603e-16	0.147371	0.133143	0.0135255	0.0127992	1.09208	1.06839	0.153084	0.110073
ENSMUSG00000001285	Myg1	-3.55262	9.03356e-16	1.25074	1.26673	0.121597	0.179314	9.74306	9.45584	0.49652	0.653969
ENSMUSG00000021018	Polr2h	-2.48189	1.44568e-15	4.09004	4.12534	1.13258	0.82526	23.6412	22.0351	6.27874	6.01261
ENSMUSG00000070572	Trmt112-ps2	-4.20793	1.46311e-15	17.7326	16.8463	1.37917	1.07672	167.457	159.964	10.5162	8.25486
ENSMUSG00000071180	Smim15	-2.09771	2.22233e-15	5.24045	5.30357	1.6612	1.67897	14.6486	15.6801	4.42526	4.16156
ENSMUSG00000058809	Hspd1-ps3	-1.99955	2.30634e-15	33.9495	35.8136	13.51	9.92684	260.257	260.99	122.498	64.2881
ENSMUSG00000028889	Yrdc	-2.18716	2.7288e-15	5.21051	5.2793	1.67055	1.42682	15.2484	16.8058	4.8189	3.64137
ENSMUSG00000084786	Ubl5	-3.30664	3.01786e-15	2.48841	1.85711	0.305727	0.286418	40.4708	40.4526	17.0443	21.0995
ENSMUSG00000027305	Ndufaf1	-3.40529	3.16881e-15	1.51598	1.06468	0.132415	0.211348	6.05601	5.64203	0.741523	0.882147
ENSMUSG00000040385	Ppp1ca	-2.34837	3.27094e-15	13.9289	14.7695	4.77675	2.7287	232.849	227.593	87.7	59.0005
ENSMUSG00000019373	Cops3	-1.95928	4.2139e-15	2.04652	1.95704	0.762691	0.624668	13.937	12.3929	4.24506	3.93264
ENSMUSG00000008301	Phax	-1.91038	4.60982e-15	1.85215	1.57099	0.606013	0.633506	4.73301	4.68346	2.16489	2.27364
ENSMUSG00000021932	Rnaseh2b	-3.92881	4.64025e-15	0.0819155	0.0834797	0.00769955	0.00674926	0.806832	0.708507	0.0915841	0.134142
ENSMUSG00000032966	Fkbp1a	-1.91154	4.72798e-15	2.01165	2.11735	0.785314	0.695637	27.7231	27.6181	12.4124	9.68242
ENSMUSG00000032112	Trappc4	-2.29194	5.6819e-15	6.22735	5.83532	1.88669	1.40777	39.0964	35.6293	12.0547	9.62842
ENSMUSG00000015656	Hspa8	-1.68588	6.34076e-15	36.4673	34.9605	16.4668	13.5831	109.684	104.963	48.6489	41.7253
ENSMUSG00000000171	Sdhd	-1.82606	7.79404e-15	7.2076	6.74787	2.79681	2.5292	49.3353	45.8116	22.4313	18.596
ENSMUSG00000027823	Gmps	-2.11566	8.62249e-15	0.657184	0.661649	0.231363	0.176612	5.64877	5.20308	1.67282	1.27423
ENSMUSG00000054312	Mrps21	-4.41593	8.82765e-15	0.760882	0.61978	0.0330009	0.0610699	8.21228	7.74725	1.3567	1.54202
ENSMUSG00000037361	Sf3b6	-2.19021	1.20335e-14	2.45452	2.27976	0.59265	0.838195	18.6912	18.0793	4.10024	5.01576
ENSMUSG00000038416	Cdc16	-2.19129	1.22274e-14	1.23236	1.11838	0.396157	0.293554	9.23671	8.05328	2.12985	1.87595
ENSMUSG00000068739	Sars	-2.32993	1.3713e-14	1.10298	1.23506	0.368349	0.250062	10.5342	11.86	4.6428	3.47753
ENSMUSG00000015290	Ubl4a	-2.68663	1.3713e-14	1.99701	1.54492	0.382255	0.36173	12.153	11.6863	2.75832	2.93906
ENSMUSG00000030738	Eif3c	-2.2276	1.37218e-14	1.33471	1.33094	0.444082	0.316105	20.1082	20.7891	6.57633	5.04069
ENSMUSG00000014402	Tsg101	-2.89326	1.46738e-14	0.343844	0.329183	0.066172	0.0546673	1.7925	1.74578	0.253134	0.249283
ENSMUSG00000085783	Gm9816	-3.13928	1.57027e-14	7.79073	8.68235	1.63606	0.767564	80.4217	66.2942	17.0749	7.72361
ENSMUSG00000026036	Nif3l1	-1.88083	1.65548e-14	0.982405	0.921562	0.343904	0.358907	5.32056	5.21175	1.61377	1.63913
ENSMUSG00000069208	Zfp825	-3.47356	1.65548e-14	0.526871	0.530922	0.0584383	0.0729967	1.08301	0.967184	0.187003	0.175192
ENSMUSG00000037058	Paip2	-1.85974	2.04293e-14	2.48574	2.41571	0.982522	0.84011	17.419	16.4929	7.06363	6.57478
ENSMUSG00000040034	Nup43	-1.8537	2.15486e-14	4.58954	4.11899	1.7381	1.52013	18.2813	16.234	5.54072	5.05517
ENSMUSG00000100801	Gm15459	-2.15498	2.67912e-14	201.434	195.277	76.9332	42.7759	548.599	534.434	207.936	119.032
ENSMUSG00000027079	Clp1	-1.82721	2.93163e-14	8.79791	9.20606	3.68863	3.15444	20.0508	19.6148	7.63186	7.21385
ENSMUSG00000003923	Tfam	-1.94591	3.71914e-14	2.19648	2.40359	0.838913	0.772699	7.1033	7.4301	2.55487	2.30222
ENSMUSG00000030881	Arfip2	-3.72522	3.71914e-14	1.0224	1.14478	0.125843	0.0873298	5.27146	6.25015	0.702624	0.57856
ENSMUSG00000004264	Phb2	-2.00466	4.61616e-14	10.0406	9.34801	3.75603	2.73392	140.657	131.916	55.225	37.9955
ENSMUSG00000024382	Ercc3	-5.38825	4.89999e-14	0.14839	0.222924	0.0054574	0.00681697	1.05826	1.05889	0.0600314	0.0999823
ENSMUSG00000035683	Melk	-2.86899	5.04716e-14	0.169012	0.14477	0.0285994	0.0297702	1.24977	1.18963	0.213985	0.237098
ENSMUSG00000007589	Tinf2	-2.76353	5.17043e-14	1.74074	1.62485	0.388327	0.266312	13.6481	15.0821	3.91068	2.6441
ENSMUSG00000041360	Pum3	-2.35851	5.82832e-14	0.620729	0.567714	0.189343	0.118751	4.88647	4.54311	1.10912	0.80652
ENSMUSG00000009549	Srp14	-2.3478	6.17145e-14	4.30128	3.78792	1.0546	1.10655	46.2577	44.4004	12.8408	12.5234
ENSMUSG00000024414	Mrpl27	-4.14144	6.43715e-14	0.949466	0.970808	0.0927553	0.0429122	5.94569	5.8067	0.628675	0.43985
ENSMUSG00000078713	Tomm5	-1.73673	6.72935e-14	19.7094	18.4716	8.09248	7.42038	93.8353	88.2925	37.5818	38.5719
ENSMUSG00000001767	Crnkl1	-3.03309	7.10698e-14	0.528484	0.497263	0.0929028	0.0734965	4.0783	3.97156	0.494243	0.390692
ENSMUSG00000030603	Psmc4	-1.92561	8.21554e-14	6.45696	5.9931	2.52668	1.88269	83.8155	76.858	27.1492	21.0974
ENSMUSG00000015994	Fnta	-2.12291	9.41574e-14	1.70427	1.49783	0.558157	0.428742	13.4001	12.8705	4.06685	3.466
ENSMUSG00000023104	Rfc2	-2.53392	9.9057e-14	0.701487	0.676408	0.183319	0.132746	11.1839	10.1153	1.98781	1.59628
ENSMUSG00000083064	Gm7785	-4.38937	1.3981e-13	7.05707	5.33809	0.365279	0.456279	21.3672	19.6159	1.46112	0.684418
ENSMUSG00000019814	Ltv1	-2.21866	1.42198e-13	1.338	1.11462	0.351216	0.365594	7.76425	7.34807	1.77993	1.73318
ENSMUSG00000029066	Mrpl20	-2.01638	1.42824e-13	3.85126	3.62089	1.34959	1.13725	30.3338	27.9487	9.17627	8.99285
ENSMUSG00000092072	Gm4540	-1.86897	1.51498e-13	69.563	73.5492	24.0004	29.5684	610.307	704.735	257.701	349.919
ENSMUSG00000029557	Mrm2	-3.0144	1.76092e-13	2.89706	2.45768	0.570682	0.288994	6.04245	6.09667	1.17221	0.658265
ENSMUSG00000030750	Nsmce1	-2.73351	1.975e-13	0.476858	0.399905	0.0884037	0.0906069	2.67138	2.53114	0.678668	0.614428
ENSMUSG00000060038	Dhps	-2.37061	1.99316e-13	5.39053	4.44664	1.41582	1.1352	34.7219	33.2993	8.81058	7.66761
ENSMUSG00000028797	Tmem234	-2.40691	2.01448e-13	0.672763	0.627835	0.185257	0.142093	5.91782	5.53034	1.92082	1.56012
ENSMUSG00000106988	Tsg101-ps	-3.52464	2.04844e-13	5.97807	6.32523	0.501275	1.04359	39.7043	39.2753	3.00765	1.44943
ENSMUSG00000031617	Tmem184c	-3.75407	2.09616e-13	0.407928	0.420995	0.0354234	0.0507011	2.27331	1.91397	0.192615	0.221241
ENSMUSG00000093798	Gm8355	-1.85302	2.11104e-13	61.4092	65.6146	28.0673	19.2212	166.03	163.682	73.2401	46.5153
ENSMUSG00000116024	Gm49527	-2.26507	2.11104e-13	1.26051	1.27723	0.436139	0.265602	2.74129	2.87312	1.06513	0.914164
ENSMUSG00000022503	Nubp1	-2.56193	2.18203e-13	0.948008	0.992835	0.242786	0.195658	8.43401	8.31959	1.91618	1.462
ENSMUSG00000028884	Rpa2	-2.12836	2.29837e-13	9.23428	8.73105	3.51436	1.99185	29.3361	28.1309	10.3711	7.16674
ENSMUSG00000037376	Trmt6	-2.50087	2.67264e-13	1.15106	1.22493	0.327231	0.228993	6.27183	6.82185	1.63341	1.43121
ENSMUSG00000052337	Immt	-1.94568	2.68099e-13	1.14527	1.06745	0.452049	0.319594	10.4353	10.0468	3.76283	2.73643
ENSMUSG00000022890	Atp5j	-1.67822	2.78185e-13	5.60328	5.89209	2.36394	2.51753	85.9496	87.3759	43.7686	54.8262
ENSMUSG00000041859	Mcm3	-2.09018	2.89533e-13	2.39597	2.98997	1.02755	0.660931	17.0204	18.3466	5.39698	3.64881
ENSMUSG00000029389	Ddx55	-3.67068	2.95982e-13	0.364354	0.365447	0.0349165	0.0444227	1.17287	1.07927	0.133846	0.12923
ENSMUSG00000030615	Tmem126a	-2.63608	3.44935e-13	1.58881	1.64286	0.319342	0.394743	12.9693	12.7212	1.69651	2.18147
ENSMUSG00000020133	2310011J03Rik	-3.41325	3.49008e-13	3.11336	4.04392	0.584894	0.267295	13.8825	16.0752	2.04	1.36617
ENSMUSG00000062101	Zfp119b	-3.30129	3.75036e-13	0.644712	0.619084	0.0791131	0.0976021	1.06404	1.05244	0.266641	0.372108
ENSMUSG00000024423	Impact	-2.43166	4.47429e-13	0.441479	0.378858	0.11681	0.0859368	1.47683	1.30667	0.327594	0.323635
ENSMUSG00000058126	Tpm3-rs7	-2.80275	4.63123e-13	5.83676	4.16836	1.01679	0.916241	57.6346	53.7077	16.5722	9.66792
ENSMUSG00000089847	Timm10b	-3.34198	4.72968e-13	2.13163	1.79376	0.272888	0.246185	19.3636	18.1939	2.57425	3.21934
ENSMUSG00000030057	Cnbp	-1.70648	4.8931e-13	62.9535	57.4292	28.7383	21.1281	344.24	307.656	153.395	109.323
ENSMUSG00000037722	Gnpnat1	-1.91034	5.09459e-13	0.970756	0.989595	0.377359	0.325164	3.96664	3.72353	1.34299	1.3054
ENSMUSG00000024791	Cdca5	-2.00779	5.10135e-13	6.75931	7.13411	2.79556	1.82686	16.3922	16.4718	6.55973	4.43238
ENSMUSG00000059195	Gm12715	-1.91414	5.63063e-13	23.9759	26.2939	9.70554	8.23863	153.415	163.256	77.211	36.0816
ENSMUSG00000001158	Snrnp27	-2.43307	5.77798e-13	1.69784	1.45074	0.445007	0.332943	15.5915	14.8869	3.65045	3.5538
ENSMUSG00000041278	Ttc1	-2.25976	6.0014e-13	1.51884	1.51663	0.530218	0.311718	6.04069	5.61061	1.89011	1.39356
ENSMUSG00000023156	Rpp14	-2.15229	7.12834e-13	2.54634	2.40619	0.90066	0.585587	6.87155	7.04849	2.15363	1.7331
ENSMUSG00000037938	Chchd5	-2.47871	7.45801e-13	2.87817	3.11743	0.830184	0.596506	15.2582	16.1563	3.18849	2.90605
ENSMUSG00000028693	Nasp	-1.75826	7.69196e-13	2.28029	2.45773	1.06509	0.819854	16.957	17.5711	7.0158	5.98872
ENSMUSG00000022354	Ndufb9	-2.33783	7.87799e-13	2.80603	2.27152	0.659273	0.709926	40.6061	34.5331	16.6808	15.0978
ENSMUSG00000030298	Sec13	-2.04096	7.96228e-13	2.16011	1.97682	0.765628	0.583019	32.5441	28.7385	10.0508	7.7611
ENSMUSG00000084384	Gm12251	-2.64954	8.6044e-13	13.3205	13.328	3.16778	2.4838	106.49	96.773	19.089	16.7014
ENSMUSG00000039617	Gm7488	-1.87092	8.93527e-13	40.5617	40.594	15.7674	14.1816	364.715	352.682	140.097	131.7
ENSMUSG00000024668	Sdhaf2	-2.38491	1.05473e-12	0.509825	0.521959	0.145045	0.119197	2.0302	1.94446	0.578906	0.53506
ENSMUSG00000059897	Zfp930	-2.09647	1.08678e-12	0.994978	0.832548	0.266737	0.318674	1.97098	1.78784	0.827492	1.08539
ENSMUSG00000051469	Zfp24	-2.02874	1.50926e-12	1.75242	1.66802	0.533809	0.610617	3.12182	3.1398	1.08228	1.14185
ENSMUSG00000029910	Mad2l1	-1.67829	1.51759e-12	3.90677	3.51552	1.5037	1.65699	20.7605	19.4542	8.13264	8.67484
ENSMUSG00000021917	Spcs1	-2.21216	1.59685e-12	9.90897	9.784	3.28122	2.38721	57.6235	53.3306	20.0225	18.914
ENSMUSG00000019773	Fbxo5	-1.6795	1.75424e-12	10.4247	10.7861	4.9575	3.97038	17.1755	18.2678	8.40751	7.43524
ENSMUSG00000026926	Pmpca	-2.37747	1.81382e-12	1.46764	1.70248	0.380915	0.453152	20.7416	19.8991	4.8305	3.3725
ENSMUSG00000028331	Trmo	-2.87313	1.82413e-12	0.802207	0.749653	0.176355	0.0996548	1.69906	1.7344	0.450965	0.424844
ENSMUSG00000006398	Cdc20	-1.89744	1.82667e-12	9.63581	9.66449	4.0692	2.87972	67.8696	63.5923	24.2542	15.6328
ENSMUSG00000002064	Sdf2	-2.65644	1.89041e-12	1.65576	1.14725	0.354198	0.236523	6.41979	4.85375	1.36333	1.15479
ENSMUSG00000004789	Dlst	-3.95672	1.99698e-12	0.203891	0.296243	0.0284946	0.0112995	2.136	2.2051	0.18725	0.189266
ENSMUSG00000039756	Dnttip2	-1.66961	2.07829e-12	6.43697	5.9034	2.85594	2.38701	21.619	19.1439	8.54088	7.54743
ENSMUSG00000000600	Krit1	-3.00724	2.18395e-12	0.221422	0.170558	0.036134	0.0288101	0.75641	0.698476	0.153762	0.203271
ENSMUSG00000117839	Gm50251	-2.72768	2.36885e-12	20.6682	17.2786	4.8826	2.61672	89.5912	78.0517	22.3343	16.1029
ENSMUSG00000028233	Tgs1	-2.20656	2.50581e-12	0.393741	0.362804	0.11942	0.100747	1.00809	0.975723	0.338746	0.355863
ENSMUSG00000057388	Mrpl18	-1.74142	2.52381e-12	8.9348	8.57599	3.86013	3.20366	58.7877	54.6934	24.041	21.6383
ENSMUSG00000070522	Gm6505	-4.80521	2.63286e-12	7.73551	6.55133	0.301693	0.418725	14.6615	14.6077	0.653669	0.628087
ENSMUSG00000039067	Psmd7	-1.60203	2.63996e-12	15.9054	14.6969	7.50083	6.13387	84.1847	77.7851	33.0545	24.3509
ENSMUSG00000027787	Nmd3	-1.57622	2.75475e-12	1.94575	1.85006	0.894421	0.830436	6.14912	5.54349	2.66431	2.35126
ENSMUSG00000048967	Yjefn3	-2.78161	2.82441e-12	0.906023	0.607317	0.170282	0.122714	16.3514	13.5032	3.91868	4.76766
ENSMUSG00000021276	Cinp	-2.2368	3.08468e-12	1.03982	0.985282	0.331031	0.242028	6.92624	6.7929	2.06303	2.0757
ENSMUSG00000029610	Aimp2	-2.04689	3.08468e-12	3.52458	3.48515	1.32721	0.940021	20.9191	19.1924	6.61327	4.93748
ENSMUSG00000022234	Cct5	-1.63769	3.13408e-12	10.545	9.80033	4.93851	3.89557	134.199	124.98	59.1407	45.7051
ENSMUSG00000008668	Rps18	-1.91831	3.13408e-12	6.55228	5.7612	2.30351	2.10126	81.423	78.9514	58.7843	57.0052
ENSMUSG00000019303	Psmc3ip	-3.22265	3.2789e-12	1.83858	1.93662	0.306535	0.225236	17.9665	15.9216	3.2637	3.30345
ENSMUSG00000025413	Ttc4	-2.13733	3.2789e-12	1.04076	1.10344	0.367043	0.284519	5.86389	5.61687	1.56969	1.01614
ENSMUSG00000027496	Aurka	-1.74977	3.44085e-12	7.00442	7.21804	3.3455	2.34528	19.2134	18.9069	8.77598	5.96722
ENSMUSG00000059040	Eno1b	-2.35433	3.4746e-12	4.75303	4.95776	1.50317	1.01375	86.899	84.0024	38.8391	20.9803
ENSMUSG00000057561	Eif1a	-1.55214	3.89572e-12	8.29419	8.19723	4.18838	3.41409	16.492	16.1865	8.04496	7.10667
ENSMUSG00000091329	1700112D23Rik	-4.26913	3.93609e-12	0.0668266	0.0577353	0.00332063	0.00604899	0.141821	0.143973	0.0439984	0.0941915
ENSMUSG00000113204	Gm46430	-3.52194	3.99762e-12	0.1797	0.181329	0.0287014	0.0105446	0.611584	0.627221	0.214417	0.261858
ENSMUSG00000067367	Lyar	-2.31327	4.11771e-12	1.30161	1.31014	0.430922	0.264725	13.6817	13.6694	3.95836	2.97571
ENSMUSG00000027998	Plrg1	-1.98407	4.24586e-12	1.243	1.25751	0.462594	0.386837	8.67333	8.41749	2.62459	2.11148
ENSMUSG00000038525	Armc10	-2.58707	4.27906e-12	0.583483	0.557305	0.125452	0.132597	3.66662	3.54432	0.775875	0.735311
ENSMUSG00000032459	Mrps22	-2.02797	4.30749e-12	1.85708	1.4951	0.582062	0.529826	7.38775	6.09132	2.10903	2.09307
ENSMUSG00000033047	Eif3l	-1.76015	4.44118e-12	2.10991	2.1841	0.950694	0.754998	34.2284	33.2956	12.0337	9.69855
ENSMUSG00000019143	Hars2	-3.22193	4.44187e-12	0.994312	0.852571	0.180732	0.0709926	3.23304	3.05004	0.675187	0.433055
ENSMUSG00000078193	Gm2000	-1.53338	4.44984e-12	148.532	140.907	67.9481	67.8334	1827.3	1803.56	1662.68	1630.44
ENSMUSG00000026333	Gin1	-3.90945	4.6512e-12	0.220387	0.224229	0.0235325	0.0144093	0.611636	0.597131	0.083056	0.12392
ENSMUSG00000022248	Rad1	-2.074	4.71923e-12	1.43415	1.38078	0.492015	0.405565	4.00757	4.09397	1.38613	1.1179
ENSMUSG00000011958	Bnip2	-2.78125	5.00024e-12	0.420482	0.453421	0.0829609	0.0899552	1.96946	1.74978	0.352584	0.277062
ENSMUSG00000065990	Aurkaip1	-2.23939	5.00156e-12	11.5381	10.8627	3.89102	2.40829	109.33	100.387	29.2703	29.1914
ENSMUSG00000025421	Hdhd2	-2.73352	5.32589e-12	0.302485	0.260966	0.0532332	0.063018	2.02403	1.9113	0.392464	0.33682
ENSMUSG00000030521	Mphosph10	-1.86626	5.51248e-12	2.62143	2.60567	1.12597	0.797179	7.91614	7.63114	3.17715	2.44755
ENSMUSG00000020534	Shmt1	-1.97487	5.74431e-12	0.962592	1.10291	0.398749	0.304482	9.41119	9.70271	2.75813	2.18882
ENSMUSG00000001380	Hars	-2.29134	5.99322e-12	0.856225	0.811785	0.255927	0.199295	8.50283	7.91834	1.85987	1.39913
ENSMUSG00000016319	Slc25a5	-1.55185	7.01943e-12	33.1771	30.9284	15.987	13.6011	358.45	316.571	183.659	164.738
ENSMUSG00000055041	Commd5	-2.77559	8.11548e-12	8.26695	7.27379	1.93723	1.02042	19.9158	19.8899	4.80808	2.81829
ENSMUSG00000118267	G630055G22Rik	-2.23072	8.49203e-12	0.0802797	0.0836636	0.0267506	0.0197851	1.45322	1.40493	0.677211	0.408891
ENSMUSG00000029433	Diablo	-2.19677	8.82524e-12	0.990849	0.911557	0.280341	0.282404	7.81759	7.15712	2.73559	1.958
ENSMUSG00000079104	Prps1l3	-1.77536	8.84163e-12	4.5664	4.17952	1.93	1.51123	9.19433	8.26817	3.9976	3.05827
ENSMUSG00000084874	Gm12906	-2.72402	8.84163e-12	20.7504	21.4644	5.02412	3.38398	101.637	101.338	30.6619	17.8428
ENSMUSG00000026254	Eif4e2	-1.78835	9.02126e-12	1.68005	1.54997	0.7148	0.543688	9.47712	9.33437	4.36237	3.82369
ENSMUSG00000036199	Ndufa13	-2.74842	9.32816e-12	1.53732	1.0407	0.299425	0.210487	28.8057	23.7991	6.83622	8.29804
ENSMUSG00000032519	Slc25a38	-3.24504	9.9113e-12	0.519713	0.430334	0.0783963	0.0528036	2.89142	2.57389	0.394287	0.355224
ENSMUSG00000110234	Gm45799	-2.94888	1.06276e-11	0.176633	0.158166	0.0304388	0.0278209	1.59899	1.50454	0.250935	0.329213
ENSMUSG00000118283	Gm7623	-2.41408	1.19808e-11	21.3856	18.263	4.9812	5.12411	101.267	94.4102	25.6092	23.7905
ENSMUSG00000086324	Gm15564	2.03804	1.33891e-11	0.321535	0.493836	1.89817	2.66876	14.7199	27.1297	183.379	266.56
ENSMUSG00000033852	Gm28042	-3.53222	1.36556e-11	0.31129	0.446662	0.0503178	0.0349184	2.88787	3.02697	0.530434	0.432116
ENSMUSG00000046675	Tmem251	-2.4211	1.38322e-11	3.17506	2.88352	0.84887	0.660483	5.92065	4.89141	1.44051	1.30312
ENSMUSG00000034024	Cct2	-1.67598	1.42151e-11	4.50315	5.12618	2.29102	1.7628	50.9811	51.5617	23.3018	19.2585
ENSMUSG00000113047	Gm47469	-4.92384	1.4314e-11	0.27942	0.399223	0.0176355	0.01049	0.667003	0.896035	0.375385	0.482539
ENSMUSG00000040354	Mars1	-2.12119	1.45461e-11	1.13083	1.07985	0.387244	0.291972	18.6137	17.6498	6.1645	4.25321
ENSMUSG00000082454	Gm12183	-1.89207	1.47388e-11	29.6162	28.9015	12.9062	8.22223	201.857	194.86	83.7493	50.5447
ENSMUSG00000030007	Cct7	-1.69413	1.51121e-11	7.388	7.64371	3.69396	2.55945	98.793	95.4043	40.1072	26.4543
ENSMUSG00000028964	Park7	-1.86635	1.51804e-11	1.87607	1.77028	0.77009	0.572302	38.094	35.883	17.8062	14.3585
ENSMUSG00000078931	Pdf	-2.21245	1.68147e-11	3.7052	4.0423	1.28934	0.935156	16.9487	18.1025	8.54292	6.30364
ENSMUSG00000089782	Btf3-ps1	-1.59991	1.69355e-11	92.0183	90.5694	42.6443	38.8412	864.28	879.414	474.684	425.728
ENSMUSG00000049891	Gm7984	-1.94303	1.69355e-11	46.9106	42.7597	17.6844	13.6171	118.197	111.538	47.5419	32.5298
ENSMUSG00000041028	Ghitm	-1.7146	1.69548e-11	3.24815	3.23857	1.51099	1.14836	41.316	39.0971	18.7522	14.6873
ENSMUSG00000066878	Gm10184	-1.8878	1.80831e-11	15.3045	14.3998	6.19534	4.57227	35.3294	32.0894	13.3905	9.96346
ENSMUSG00000003779	Kif20a	-1.61242	1.80978e-11	4.29158	4.72056	2.0456	1.94145	31.1039	31.1703	15.0223	12.6899
ENSMUSG00000002458	Rgs19	-2.36626	1.80978e-11	2.48495	2.01238	0.644741	0.524705	15.7904	14.3344	3.79225	3.35567
ENSMUSG00000030980	Knop1	-2.04473	1.87634e-11	1.45081	1.55286	0.567481	0.403653	7.96465	8.70101	3.17317	2.38254
ENSMUSG00000036721	Zscan12	-3.26345	1.93508e-11	0.769353	0.623965	0.116982	0.0716298	1.32944	1.17523	0.223642	0.157586
ENSMUSG00000002068	Ccne1	-1.79413	2.03337e-11	3.7165	3.52584	1.58633	1.22158	24.8499	23.0411	8.89368	5.98718
ENSMUSG00000020522	Mfap3	-3.07428	2.04379e-11	0.446225	0.450557	0.0817153	0.0581992	1.0117	0.980624	0.258048	0.246227
ENSMUSG00000047721	Bola2	-2.61733	2.04379e-11	2.43853	2.10012	0.577868	0.401016	39.8647	41.2327	12.3575	13.3107
ENSMUSG00000079225	Gm9531	-1.81101	2.04379e-11	46.2512	48.8163	21.6314	14.6972	744.876	676.841	385.715	258.709
ENSMUSG00000113149	Gm49383	-1.64488	2.07632e-11	2.68743	2.78179	1.25802	1.10275	15.61	16.0918	10.3724	11.7833
ENSMUSG00000051518	Rps19bp1	-1.83753	2.0803e-11	7.46491	7.20787	3.06372	2.45601	31.9385	30.7071	13.6547	10.5755
ENSMUSG00000057497	Fam136a	-1.67611	2.14623e-11	13.6965	13.2079	6.43831	4.90344	77.2262	70.9793	33.4172	28.237
ENSMUSG00000030224	Strap	-1.55406	2.31158e-11	3.76241	3.72018	1.85387	1.58969	24.8499	24.7207	10.6651	8.85396
ENSMUSG00000036992	Nxt1	-1.59151	2.32629e-11	11.8205	11.4502	5.28628	5.18598	25.4779	25.2441	11.1525	10.3522
ENSMUSG00000008475	Arpc5	-1.82794	2.36102e-11	2.74825	2.73032	1.12615	0.951286	18.414	16.1475	7.8255	5.49798
ENSMUSG00000098789	Jmjd7	-3.79084	2.41144e-11	0.843736	1.09979	0.0956071	0.0928862	8.31194	8.66362	1.34487	1.04829
ENSMUSG00000021037	Ahsa1	-1.85011	2.45997e-11	4.10018	4.07377	1.75046	1.28992	42.7458	42.6067	10.9881	7.27947
ENSMUSG00000029247	Paics	-1.55721	2.48454e-11	4.3131	4.04337	2.06923	1.77088	51.8543	47.4795	26.0072	21.8032
ENSMUSG00000019761	Krt10	-6.0912	2.56126e-11	1.20514	1.06057	0.00792578	0.0495014	3.20425	2.70724	0.0158516	0.115503
ENSMUSG00000067608	Pcna-ps2	-1.67277	2.5812e-11	59.7788	57.2215	27.4097	22.0611	275.161	262.088	110.807	94.7583
ENSMUSG00000084067	Gm14269	-2.12688	2.64623e-11	79.8102	72.3667	28.6431	17.7342	600.195	529.439	218.816	160.938
ENSMUSG00000056820	Tsnax	-3.47002	2.64623e-11	0.302485	0.232765	0.035356	0.0288026	1.57567	1.43177	0.264402	0.428839
ENSMUSG00000020910	Adprm	-2.90994	2.75395e-11	0.484065	0.519401	0.102029	0.0738826	1.53949	1.52306	0.31496	0.29553
ENSMUSG00000039615	Stub1	-2.1826	3.07756e-11	6.87375	5.71706	2.20215	1.49701	76.4353	75.4494	26.5045	17.0051
ENSMUSG00000027628	Aar2	-2.0131	3.1364e-11	0.981019	0.965572	0.374744	0.26957	2.47707	2.60705	0.917055	0.726254
ENSMUSG00000024683	Mrpl16	-2.16277	3.16435e-11	2.69111	2.88725	0.80566	0.890592	13.7617	14.022	3.86432	3.93345
ENSMUSG00000025358	Cdk2	-1.8719	3.17296e-11	2.78571	3.13007	1.15301	1.02329	14.5859	14.8011	6.0912	3.99751
ENSMUSG00000113137	Gm7511	-2.29133	3.23623e-11	24.0916	27.2819	7.45786	6.6326	139.757	149.795	32.0036	27.7363
ENSMUSG00000022312	Eif3h	-2.0089	3.23623e-11	0.246531	0.212863	0.0825238	0.0712987	2.7672	2.56889	1.21681	1.05745
ENSMUSG00000079737	Bfar	-2.51289	3.75575e-11	1.73234	1.37649	0.322803	0.430522	2.97747	2.61976	0.817094	0.829542
ENSMUSG00000106181	Gm9523	-2.1156	4.18256e-11	13.4777	16.4829	5.34146	3.86282	39.9806	48.5082	14.0284	9.07177
ENSMUSG00000013593	Ndufs2	-2.47058	4.39176e-11	1.05039	0.981813	0.325119	0.155882	23.5809	21.7872	8.86492	6.03019
ENSMUSG00000029388	Eif2b1	-1.79579	4.39176e-11	3.84915	3.30613	1.538	1.2397	25.4214	22.0173	9.82711	7.36212
ENSMUSG00000028292	Rars2	-2.80563	4.66345e-11	0.208851	0.157344	0.0396377	0.0300075	1.86677	1.54552	0.169361	0.177044
ENSMUSG00000001525	Tubb5	-1.50137	4.9484e-11	67.5487	71.5601	37.6048	28.7356	473.426	498.553	280.268	198.752
ENSMUSG00000068706	Gm10250	-1.94336	5.47488e-11	38.0916	43.6809	15.8182	12.666	687.704	676.757	344.757	332.693
ENSMUSG00000006050	Sra1	-2.05569	5.95654e-11	4.75029	3.6627	1.42624	1.31238	29.9677	26.4991	8.68352	8.10392
ENSMUSG00000019942	Cdk1	-1.38864	6.04601e-11	5.76867	5.52308	2.95742	2.8974	18.2691	17.0529	8.6635	8.10128
ENSMUSG00000036639	Nudt1	-2.21382	6.25626e-11	0.707271	0.769228	0.229318	0.197549	7.24952	7.5809	1.86222	1.62566
ENSMUSG00000030180	Kdm5a	-1.86935	6.41362e-11	0.222419	0.234605	0.0850506	0.0843165	0.68537	0.784394	0.6476	0.785829
ENSMUSG00000057649	Brd9	-4.03147	6.74337e-11	0.217137	0.171472	0.0169372	0.0146921	1.7472	1.65507	0.173606	0.143983
ENSMUSG00000018287	Spag7	-1.69532	6.87872e-11	5.13075	5.2735	2.31416	2.01842	32.1679	32.2304	12.6904	10.6928
ENSMUSG00000078656	Vps25	-2.26321	7.26837e-11	1.88535	1.92439	0.55764	0.510811	26.2851	23.8978	7.04856	5.44478
ENSMUSG00000112825	Gm9118	-1.50679	7.4764e-11	110.156	115.269	58.943	48.1311	980.816	928.242	643.188	511.989
ENSMUSG00000033543	Gtf2a2	-1.7667	7.78069e-11	2.16377	2.21311	0.896921	0.84159	14.6605	14.6465	4.62988	4.79969
ENSMUSG00000053398	Phgdh	-3.51616	7.93511e-11	0.217315	0.192504	0.0303707	0.0151747	3.4488	2.9389	1.35575	0.867487
ENSMUSG00000001240	Ramp2	-2.23816	7.99442e-11	0.819171	0.848708	0.245836	0.230811	11.4468	10.4434	3.10428	2.46868
ENSMUSG00000067365	Tmem128	-4.02969	8.49543e-11	0.536603	0.509941	0.0620626	0.0143563	2.26977	2.16118	0.279282	0.222522
ENSMUSG00000114278	Gm49027	-2.20573	8.55235e-11	0.943395	0.851519	0.272192	0.252978	7.60803	7.06033	2.59069	1.83662
ENSMUSG00000027245	Hypk	-1.88113	9.18445e-11	3.69229	3.25049	1.25296	1.31055	49.2883	45.6453	16.0584	18.7635
ENSMUSG00000028191	Bcl10	-1.97082	9.4549e-11	1.26632	1.4897	0.485091	0.463848	3.12797	3.46604	1.06607	1.03926
ENSMUSG00000078812	Eif5a	-1.59328	9.57766e-11	28.6041	26.4584	14.2818	10.3464	425.372	391.91	262.508	180.337
ENSMUSG00000117458	Gm6552	-2.19792	9.6531e-11	11.9209	12.5983	4.05367	3.06881	144.424	146.097	67.7454	48.2058
ENSMUSG00000037089	Slc35b2	-2.3404	1.00217e-10	3.16139	3.14182	0.98658	0.660831	14.9629	14.7273	5.1388	3.69708
ENSMUSG00000025613	Cct8	-1.45981	1.12402e-10	7.20448	7.07733	3.79372	3.22733	122.388	112.817	58.7884	46.4422
ENSMUSG00000033430	Terf2ip	-2.22046	1.12954e-10	1.16177	1.26285	0.342565	0.364017	2.98101	3.4367	1.18113	1.38178
ENSMUSG00000084301	Gm7856	-1.83623	1.13135e-10	11.79	13.2566	4.69211	4.81604	73.5897	73.9296	28.0217	19.5822
ENSMUSG00000033669	Zfp7	-2.25022	1.22022e-10	1.19793	1.29698	0.439002	0.253013	2.31601	2.42802	0.94249	0.753877
ENSMUSG00000053134	Supt7l	-3.33213	1.4495e-10	0.41809	0.47215	0.0762662	0.0358528	1.35549	1.42511	0.405933	0.327797
ENSMUSG00000005470	Asf1b	-1.70933	1.48949e-10	2.30907	2.30786	1.07124	0.826505	7.24858	6.77909	3.3734	2.95972
ENSMUSG00000028869	Gnl2	-2.2293	1.65602e-10	0.42367	0.419956	0.150333	0.0874232	3.51706	3.31085	0.832293	0.552515
ENSMUSG00000045455	Gm9797	-2.91955	1.67768e-10	6.38879	4.69336	0.854039	1.18533	22.4071	18.3178	3.54556	4.09479
ENSMUSG00000028651	Ppie	-2.08166	1.6844e-10	1.06247	1.00999	0.347734	0.311769	10.4522	9.63514	3.13468	2.52057
ENSMUSG00000019792	Trmt11	-2.04514	1.80462e-10	0.225172	0.195755	0.0690595	0.0693374	1.0032	0.902027	0.253218	0.279389
ENSMUSG00000034274	Thoc5	-3.39406	1.81091e-10	0.158103	0.145353	0.0203959	0.0181978	1.92677	1.94603	0.231153	0.283077
ENSMUSG00000031513	Leprotl1	-2.38933	1.90672e-10	0.813627	0.7858	0.201831	0.213052	2.88329	2.4575	0.733413	0.763437
ENSMUSG00000022204	Ngdn	-2.08924	1.90865e-10	3.29554	3.15117	1.30196	0.710829	18.6927	16.8789	7.40281	6.22562
ENSMUSG00000070697	Utp3	-1.66709	1.93587e-10	24.7242	22.2219	11.061	8.86956	70.8093	67.37	27.6224	25.7759
ENSMUSG00000035960	Apex1	-1.45938	1.94443e-10	58.5545	54.8064	30.6777	25.0784	273.344	253.245	113.2	91.3815
ENSMUSG00000026021	Sumo1	-1.4186	1.95633e-10	0.821624	0.748103	0.389323	0.409687	5.91528	5.52534	2.55128	2.64164
ENSMUSG00000039128	Cdc123	-1.92991	2.06109e-10	0.382685	0.308996	0.117212	0.130677	4.51431	3.89967	0.747464	0.749393
ENSMUSG00000037855	Zfp365	2.14897	2.08556e-10	0.0987529	0.138237	0.720111	0.702342	0.384039	0.49247	2.27074	2.23472
ENSMUSG00000024841	Eif1ad	-1.7804	2.08556e-10	5.06625	5.17826	2.23301	1.77166	24.6249	24.5728	6.95092	5.31499
ENSMUSG00000005804	Bloc1s6	-3.10786	2.08586e-10	0.483372	0.616921	0.0682955	0.111273	2.82056	3.04278	0.534486	0.655276
ENSMUSG00000034701	Neurod1	2.72749	2.17221e-10	0.234192	0.379654	2.73385	2.77362	0.564815	0.677953	4.89783	5.24262
ENSMUSG00000023723	Mrps23	-2.00956	2.24063e-10	2.09568	1.99017	0.727623	0.63832	7.867	7.2758	2.4849	1.98165
ENSMUSG00000084830	Gm14539	-1.60434	2.46376e-10	184.238	202.438	75.0904	99.0212	2036.33	2274.95	1274.1	1726.24
ENSMUSG00000027131	Emc4	-2.28921	2.50623e-10	2.1609	1.94392	0.590999	0.540829	17.0897	14.4765	4.61759	3.83988
ENSMUSG00000038550	Ciart	-3.12589	2.51968e-10	1.648	1.45372	0.269424	0.199031	3.43591	3.62665	0.625758	0.633281
ENSMUSG00000020649	Rrm2	-1.30553	2.53022e-10	23.5276	24.1674	13.362	12.8063	90.7551	91.7642	42.1713	39.0278
ENSMUSG00000091900	Gm4353	-1.94689	2.53022e-10	18.8746	18.1923	7.6537	5.17856	51.3427	47.9835	18.0135	13.8854
ENSMUSG00000084013	Gm14270	-2.00566	2.62498e-10	18.8776	16.8172	6.43185	5.53251	128.629	113.516	47.95	37.5249
ENSMUSG00000083396	Gm15542	-1.88222	2.98038e-10	16.6462	15.279	6.41288	5.2267	74.2978	67.2181	27.6709	18.123
ENSMUSG00000047989	Ino80c	-2.60499	2.99798e-10	0.45078	0.43701	0.0871555	0.11439	2.15561	1.90483	0.458514	0.50095
ENSMUSG00000021040	Slirp	-1.75994	3.08826e-10	2.34239	3.03719	1.02324	1.1345	32.1833	35.4799	14.0156	16.585
ENSMUSG00000026335	Pam	-1.48523	3.11089e-10	0.1569	0.153475	0.0782771	0.0717759	1.44953	1.46679	0.841858	0.793372
ENSMUSG00000041645	Ddx24	-1.7372	3.28226e-10	1.35845	1.43992	0.622487	0.505454	7.97765	8.50129	3.2822	2.45126
ENSMUSG00000035885	Cox8a	-1.67821	3.33555e-10	12.5372	10.6402	5.07785	4.73513	186.662	191.709	130.451	135.887
ENSMUSG00000031568	Rwdd4a	-2.27551	3.41101e-10	0.577061	0.523369	0.167204	0.13713	2.57411	2.6555	0.80731	0.808713
ENSMUSG00000025428	Atp5a1	-1.50746	3.56017e-10	11.3499	12.0373	6.32338	4.76415	167.959	168.183	81.9224	61.125
ENSMUSG00000030697	Ppp4c	-1.78748	3.70895e-10	3.77089	4.1787	1.77385	1.30941	38.6318	37.0459	15.0016	12.4189
ENSMUSG00000020801	Med31	-1.73835	3.76932e-10	5.21246	5.4566	1.97064	2.40196	11.9766	12.307	5.1624	5.57535
ENSMUSG00000021868	Ppif	-2.03887	3.76932e-10	2.6028	2.72534	1.02676	0.698206	18.1827	17.4785	7.00674	4.69409
ENSMUSG00000030695	Aldoa	-1.54806	4.02382e-10	9.27424	9.30495	4.7652	3.79857	250.7	254.883	130.751	111.216
ENSMUSG00000048574	Ccnb1-ps	-1.65534	4.28359e-10	24.501	23.8478	11.3926	9.27637	80.1605	75.1094	35.6969	24.1923
ENSMUSG00000028851	Nudc	-2.06916	4.30687e-10	1.3299	1.06167	0.435891	0.327698	14.8542	14.7994	5.74166	4.49198
ENSMUSG00000014856	Tmem208	-2.01045	4.3905e-10	2.06427	1.57236	0.639457	0.581473	10.065	8.80003	3.18993	2.62428
ENSMUSG00000016257	Prelid3b	-1.65302	4.61541e-10	3.97786	3.77923	1.82529	1.49801	19.9838	18.6528	7.15482	5.98356
ENSMUSG00000101316	Gm12663	-4.95622	4.80592e-10	3.89386	3.65289	0.136045	0.212422	20.8078	21.4383	0.544182	0.637266
ENSMUSG00000038335	Tsr1	-1.67113	4.94403e-10	3.68167	4.13264	1.91936	1.37207	9.411	10.3062	4.94582	3.76117
ENSMUSG00000071302	2610044O15Rik8	-2.58962	4.94702e-10	0.526264	0.530689	0.149802	0.0789067	1.0041	1.01371	0.34653	0.341929
ENSMUSG00000036398	Ppp1r11	-1.91688	5.30673e-10	5.02645	4.28654	1.56852	1.80301	30.2103	29.7008	9.91151	9.59605
ENSMUSG00000031256	Cstf2	-2.18646	5.71949e-10	0.371236	0.381999	0.113196	0.110466	1.96165	1.91622	0.590744	0.527782
ENSMUSG00000010406	Mrpl52	-1.7084	5.77743e-10	8.08393	7.55378	3.3521	3.12015	37.6977	39.4005	15.1245	17.4824
ENSMUSG00000001569	Nom1	-2.66012	5.78139e-10	0.319342	0.324213	0.0787162	0.0556012	1.07621	1.01471	0.245988	0.216552
ENSMUSG00000063412	Gm10131	-1.53718	5.78139e-10	87.5876	77.8683	42.7208	34.2854	618.815	574.697	330.92	256.126
ENSMUSG00000089648	Gm15790	-2.34901	7.05512e-10	6.80238	9.12575	2.31805	1.84359	23.9947	25.7264	7.52714	4.12098
ENSMUSG00000024146	Cript	-1.70979	7.17739e-10	2.32327	2.00714	0.876413	0.925512	9.64525	8.80011	4.03277	4.21769
ENSMUSG00000030271	Ogg1	-3.09322	7.24822e-10	0.647864	0.666004	0.100602	0.108909	5.88117	5.6752	3.30778	3.41806
ENSMUSG00000046516	Cox17	-1.99651	7.32004e-10	0.856758	0.82078	0.268207	0.305776	12.6419	12.9151	4.15082	5.28238
ENSMUSG00000059920	4930453N24Rik	-1.65551	7.32004e-10	1.12002	1.15854	0.473359	0.51021	2.16798	2.22546	0.867825	1.02741
ENSMUSG00000006299	Aamp	-1.81085	7.47785e-10	4.78282	4.95343	2.16155	1.55079	61.2011	60.5068	25.2203	15.688
ENSMUSG00000024742	Fen1	-1.64732	7.71961e-10	9.23231	7.81158	4.14562	3.19105	31.0405	27.6594	13.2388	9.62702
ENSMUSG00000104496	Gm5837	-2.25343	7.77343e-10	16.9026	15.044	6.02153	2.82433	183.203	171.686	56.7166	32.2073
ENSMUSG00000046909	Tefm	-2.00617	7.77343e-10	3.44544	2.89033	1.23267	0.875986	6.2972	5.64502	2.7024	2.23315
ENSMUSG00000015668	Pdzd11	-2.1856	8.89236e-10	2.89375	2.67698	0.830925	0.828135	30.076	28.1083	10.0241	9.95602
ENSMUSG00000047022	Mipol1	-1.42082	9.03593e-10	0.216083	0.222357	0.117862	0.10349	0.488098	0.484713	0.278839	0.288347
ENSMUSG00000089991	Gm16332	-2.14678	9.23351e-10	0.321077	0.28559	0.119658	0.0618169	3.44623	3.23278	1.09199	0.679063
ENSMUSG00000078503	Zfp990	-1.68874	9.23351e-10	0.813915	0.728456	0.320901	0.329265	1.34696	1.29952	0.622318	0.74204
ENSMUSG00000017801	Mlx	-1.95236	9.47672e-10	2.88417	2.85039	1.07046	0.921687	16.5603	16.0785	6.70688	4.97986
ENSMUSG00000029048	Rer1	-1.84167	1.02887e-09	1.73818	1.63603	0.724772	0.536123	11.8016	10.1247	3.53891	2.76352
ENSMUSG00000048100	Taf13	-1.76335	1.15552e-09	1.53744	1.69243	0.675688	0.606234	6.45826	6.55568	2.74233	2.91934
ENSMUSG00000025995	Wdr75	-1.76123	1.19463e-09	0.90336	0.850828	0.398497	0.295612	5.80117	5.13723	1.98104	1.5162
ENSMUSG00000024082	Ndufaf7	-2.66939	1.19463e-09	0.630005	0.65687	0.155199	0.111844	4.90657	4.47197	0.832704	0.708346
ENSMUSG00000026095	Asnsd1	-2.68656	1.21331e-09	0.831022	1.17755	0.256306	0.150074	7.88038	8.15117	2.16659	1.68416
ENSMUSG00000028455	Stoml2	-2.29862	1.22516e-09	2.30478	2.15435	0.567223	0.674792	38.123	36.5526	7.10649	5.98878
ENSMUSG00000031984	2810004N23Rik	-1.6658	1.22516e-09	1.31821	1.38512	0.663458	0.479416	8.79548	8.99888	3.65835	3.06049
ENSMUSG00000026248	Mrpl44	-1.87817	1.29987e-09	3.65094	3.04387	1.35062	1.09973	9.69647	9.18444	3.81174	3.12424
ENSMUSG00000059878	Zfp422	-3.42389	1.35784e-09	0.830321	1.02444	0.13075	0.0952717	1.41505	2.00283	0.268037	0.231374
ENSMUSG00000069011	Gm10254	-1.82753	1.35868e-09	36.9751	30.967	15.3331	10.3276	160.068	144.844	62.5727	41.3103
ENSMUSG00000029617	Ccz1	-2.42148	1.37691e-09	0.36957	0.28079	0.0857794	0.0779723	2.61509	2.51009	0.42044	0.425075
ENSMUSG00000014767	Tbp	-1.70353	1.38997e-09	0.693493	0.666466	0.279034	0.288075	3.94412	3.78335	1.43176	1.5618
ENSMUSG00000038500	Prr3	-3.32355	1.39473e-09	0.613459	0.782703	0.122779	0.0528847	2.30994	2.78046	0.516517	0.467148
ENSMUSG00000049957	Ccdc137	-3.81047	1.42942e-09	0.718776	0.578829	0.0678375	0.0543189	1.71759	1.82837	0.527045	0.586644
ENSMUSG00000007050	Lsm2	-1.4754	1.42942e-09	8.40304	8.81167	4.26084	4.12387	51.503	53.4395	23.1961	24.1373
ENSMUSG00000028848	Gpn2	-2.84995	1.46968e-09	1.02756	1.16697	0.278373	0.110388	4.34736	4.63677	0.86163	0.754318
ENSMUSG00000052192	Gm5963	-1.77512	1.48248e-09	78.7851	74.3845	26.9223	34.4916	1130.65	1205.47	911.492	1200.59
ENSMUSG00000029840	Mtpn	-1.67783	1.66977e-09	0.673481	0.751753	0.319698	0.28024	5.42171	5.41596	2.34305	2.22222
ENSMUSG00000037570	Mcrs1	-3.73621	1.67157e-09	0.452523	0.432851	0.0498808	0.0370877	4.02809	4.34105	0.91567	0.838182
ENSMUSG00000024477	Pggt1b	-2.64192	1.69455e-09	0.154517	0.138258	0.0299823	0.034182	0.528679	0.423573	0.13492	0.179827
ENSMUSG00000068039	Tcp1	-1.48351	1.75228e-09	11.1507	10.4852	5.98646	4.45367	114.457	107.675	55.3182	42.2628
ENSMUSG00000075256	Cerkl	2.37701	1.78088e-09	0.0129276	0.0149961	0.0983348	0.0983303	0.0350891	0.0358998	0.214994	0.244483
ENSMUSG00000025747	Tyms	-1.92733	1.78088e-09	0.824234	0.893125	0.278992	0.338815	7.37273	6.67239	1.4943	1.67647
ENSMUSG00000025056	Nr0b1	-1.62764	1.78088e-09	14.5576	13.5606	7.27352	4.96105	55.3329	52.6654	21.8361	16.2936
ENSMUSG00000061360	Phf5a	-1.47851	1.7867e-09	6.3238	6.27079	3.32793	2.77133	34.1264	32.2387	16.8645	14.5449
ENSMUSG00000108702	Gm9333	-2.11456	1.7867e-09	7.88604	8.19549	2.6352	2.35853	65.3351	58.9728	27.1401	19.0221
ENSMUSG00000025487	Psmd13	-1.60742	1.82959e-09	1.69518	1.68913	0.816721	0.679311	17.3922	16.9635	7.68265	5.35313
ENSMUSG00000073684	Faap20	-3.29345	1.85822e-09	0.668691	0.758136	0.118294	0.0689564	4.99402	5.04036	0.667178	0.650161
ENSMUSG00000104913	Gm6560	-1.78499	1.86941e-09	24.3989	27.3681	12.472	7.58916	564.361	596.256	380.059	170.927
ENSMUSG00002076173	Gm55118	1.87593	2.09774e-09	102.256	199.28	716.252	780.679	4549.39	8677.73	48550.2	60464.6
ENSMUSG00000029363	Rfc5	-1.72696	2.18103e-09	2.46565	2.11757	1.04491	0.818092	22.489	20.4052	10.3569	7.47438
ENSMUSG00000081451	Gm12734	-1.88707	2.25397e-09	31.4795	24.2061	12.0983	8.08563	173.26	152.438	60.9039	42.5032
ENSMUSG00000082279	Gm12870	-2.36499	2.30751e-09	10.9573	13.3822	4.10493	2.06972	106.533	102.823	37.4896	16.9584
ENSMUSG00000083692	Gm9575	-2.05179	2.30884e-09	14.8001	14.3957	5.9861	3.34354	147.348	136.673	50.5899	30.6492
ENSMUSG00000014504	Srp19	-1.64564	2.30884e-09	5.21769	4.24803	2.14085	1.9573	30.5969	29.4171	11.4066	12.5692
ENSMUSG00000031897	Psmb10	-3.7722	2.30884e-09	1.78515	1.67236	0.252487	0.0500616	34.7781	36.1146	6.1679	7.5593
ENSMUSG00000111877	Gm6477	-1.4673	2.32697e-09	121.684	123.823	68.7055	50.9639	1130.86	1123.94	818.197	594.874
ENSMUSG00000005481	Ddx39a	-1.51289	2.34725e-09	10.0444	9.20558	5.31182	3.78654	96.802	85.5287	40.2669	29.6728
ENSMUSG00000029446	Psph	-1.90676	2.40238e-09	0.68691	0.749469	0.291716	0.219997	5.17312	4.86892	2.30247	2.04194
ENSMUSG00000036438	Calm2	-1.27186	2.79805e-09	11.4728	10.6007	6.42551	5.97881	48.8951	43.6541	23.0856	22.4908
ENSMUSG00000029500	Pgam5	-1.72352	2.88907e-09	1.90792	1.86192	0.842973	0.691921	7.05336	7.36256	3.01537	2.51608
ENSMUSG00000029551	Psmg3	-2.39143	2.93863e-09	2.56572	2.66465	0.781435	0.535419	9.71436	10.6238	2.69051	2.03871
ENSMUSG00000044991	Shld1	-3.16822	3.07348e-09	0.0772604	0.0715707	0.0101623	0.012694	0.227237	0.24334	0.0787578	0.123766
ENSMUSG00000063524	Eno1	-1.70064	3.11244e-09	2.54064	2.28832	1.15765	0.83683	60.8891	57.5713	31.8004	21.2053
ENSMUSG00000107906	Eif4a3l2	-2.05081	3.35926e-09	13.0523	13.3101	5.38263	3.03806	58.2006	60.2747	22.7028	15.0907
ENSMUSG00000090733	Rps27	-2.75843	3.37663e-09	6.91181	4.77224	1.23988	1.08053	20.1165	14.4183	5.4497	6.06299
ENSMUSG00000099913	Gm28551	-2.57279	3.39198e-09	0.255368	0.354843	0.0839734	0.0499491	2.46141	2.50291	0.729369	0.619369
ENSMUSG00000073616	Cops9	-2.21002	3.39401e-09	1.85418	1.91979	0.491335	0.630552	18.1204	20.7977	6.85176	9.00989
ENSMUSG00000034826	Nup54	-1.73309	3.49991e-09	0.989206	0.95614	0.428809	0.358469	2.96762	2.77805	1.21524	1.04094
ENSMUSG00000027300	Ubox5	-2.34385	3.54057e-09	0.296985	0.267949	0.0952169	0.0508281	0.742462	0.763728	0.327969	0.276166
ENSMUSG00000067847	Romo1	-3.72732	3.54392e-09	2.55147	2.283	0.333423	0.115691	31.2472	27.559	4.92726	4.31913
ENSMUSG00000038268	Ovca2	-2.06876	3.67404e-09	4.31004	4.28182	1.59875	1.12509	16.4345	15.6009	5.42673	5.22697
ENSMUSG00000054309	Cpsf3	-1.93159	3.78951e-09	0.459751	0.442843	0.173535	0.144054	6.6153	6.13598	1.59037	1.22332
ENSMUSG00000004535	Tax1bp1	-1.54682	3.93388e-09	0.522963	0.593668	0.27699	0.237824	4.02549	4.18163	1.54156	1.36173
ENSMUSG00000111380	D9Wsu149	-2.33145	3.96266e-09	14.2281	14.0041	4.16885	3.31173	163.28	160.322	41.4143	37.571
ENSMUSG00000004665	Cnn2	-2.38847	4.07082e-09	1.03651	1.11224	0.309317	0.235816	8.44016	9.56524	4.19975	2.60305
ENSMUSG00000025066	Sfr1	-1.28241	4.07978e-09	18.4391	19.2207	10.6747	10.313	115.901	113.327	66.4501	60.0379
ENSMUSG00000055760	Gemin6	-1.60453	4.14762e-09	6.5369	6.77335	3.2607	2.62506	23.3461	21.6351	10.4085	10.7009
ENSMUSG00000040112	Mrps35	-1.82535	4.35645e-09	0.582339	0.462945	0.1972	0.204187	3.77774	3.47943	1.467	1.41845
ENSMUSG00000031490	Eif4ebp1	-1.23315	4.40514e-09	9.98417	10.0375	6.02383	5.5193	73.3159	72.2422	47.2677	44.8184
ENSMUSG00000018293	Pfn1	-1.29446	4.65585e-09	20.5201	21.88	11.5293	11.9406	454.862	452.605	297.314	256.359
ENSMUSG00000066000	Zfp979	-1.34612	4.76098e-09	1.49828	1.54598	0.759774	0.871849	3.25199	3.2552	1.69111	1.78807
ENSMUSG00000035351	Nup37	-1.72112	5.01032e-09	0.701684	0.665056	0.314424	0.241961	4.26208	4.01774	1.20477	1.31783
ENSMUSG00000027313	Chac1	-3.09787	5.08446e-09	1.36796	1.7649	0.268682	0.215139	2.4956	3.32966	0.733709	0.451793
ENSMUSG00000018733	Pex12	-2.67734	5.38859e-09	0.704276	0.808718	0.151739	0.170758	1.87073	1.91348	0.676674	0.828174
ENSMUSG00000042660	Wdr55	-2.60739	5.49353e-09	2.98654	2.85963	0.898275	0.340017	28.9077	26.2959	6.16997	4.30688
ENSMUSG00000021266	Wars1	-2.281	5.61307e-09	0.237276	0.23858	0.0667975	0.0655587	2.53322	2.65798	0.843557	0.53639
ENSMUSG00000115505	Gm9247	-2.13658	5.61307e-09	12.6024	15.2178	5.28371	3.05556	272.469	268.179	141.747	72.7223
ENSMUSG00000022024	Sugt1	-1.62486	5.83313e-09	0.764373	0.605009	0.329903	0.269872	6.44257	5.72525	2.60013	2.7544
ENSMUSG00000079555	Haus3	-1.53782	5.88662e-09	2.18275	1.80376	0.851636	1.02739	4.21651	3.64785	1.73034	2.11979
ENSMUSG00000030983	Bccip	-1.70142	5.94762e-09	1.87495	1.73858	0.832983	0.660361	26.1604	23.6311	11.0384	9.61256
ENSMUSG00000038957	Edc3	-2.25836	6.01122e-09	0.201535	0.259698	0.076343	0.0509214	1.32191	1.52165	0.675228	0.581738
ENSMUSG00000027879	Sec22b	-1.68469	6.1556e-09	1.06613	0.945448	0.46469	0.377757	5.34121	4.95581	1.9694	1.79051
ENSMUSG00000067161	Gm5560	-1.76261	6.28124e-09	25.2878	24.2465	11.4698	8.06092	258.825	224.328	127.446	93.4611
ENSMUSG00000055612	Cdca7	-1.48383	6.41745e-09	3.51292	4.11492	2.02144	1.64923	10.2401	11.2439	5.59084	4.50538
ENSMUSG00000022035	Ccdc25	-1.76133	6.54652e-09	0.55092	0.704724	0.270171	0.226837	2.84211	2.99507	1.40422	1.27538
ENSMUSG00000096458	Moap1	-2.6299	6.98202e-09	5.94258	5.28815	1.59274	0.757915	12.6585	11.7381	3.3675	2.08427
ENSMUSG00000061111	Mcrip1	-2.22319	7.07072e-09	1.22708	1.3084	0.390614	0.337184	7.49881	7.16266	2.48659	1.9041
ENSMUSG00000002728	Naa20	-1.58366	7.14501e-09	2.7054	2.61876	1.38728	0.999013	7.55072	7.16354	3.35676	2.855
ENSMUSG00000007739	Cct4	-1.40795	7.27456e-09	7.40993	6.8477	4.09559	3.16099	84.3352	76.6051	40.8281	32.6227
ENSMUSG00000027088	Phospho2	-2.00316	7.40957e-09	1.00484	1.04427	0.320086	0.378921	4.60317	3.90081	2.19667	1.88807
ENSMUSG00000027170	Eif3m	-1.88028	7.72163e-09	0.735894	0.704553	0.265525	0.264716	7.60647	6.61095	1.92973	2.00873
ENSMUSG00000001445	Mrpl10	-1.83254	7.7731e-09	2.39115	2.08367	0.957819	0.726723	14.484	14.6007	5.53832	3.72224
ENSMUSG00000038733	Wdr26	-1.59459	8.1055e-09	0.500575	0.600701	0.245376	0.248423	2.67725	3.05677	1.80502	1.83518
ENSMUSG00000031799	Tpm4	-1.83321	8.14617e-09	0.786657	0.831716	0.360314	0.245121	6.07248	6.27658	3.09246	2.17655
ENSMUSG00000050900	Gm7327	-1.71239	8.14617e-09	26.0142	25.2527	10.9443	10.1958	129.624	122.128	56.9701	40.055
ENSMUSG00000026775	Yme1l1	-1.54588	8.25639e-09	0.565305	0.525641	0.249925	0.257783	3.68671	3.68617	1.31419	1.36167
ENSMUSG00000117924	Tmem223	-2.25601	8.31285e-09	6.65565	5.50427	1.89333	1.5125	32.3331	29.4982	9.90696	8.93751
ENSMUSG00000031792	Usb1	-2.98551	8.51642e-09	0.490057	0.354219	0.0963104	0.0401012	4.5292	4.13758	0.873214	0.512404
ENSMUSG00000113061	Rps18-ps5	-1.75544	8.53657e-09	25.6382	24.0059	9.71582	10.2812	316.877	299.979	245.204	265.523
ENSMUSG00000052906	Ubxn8	-2.2135	8.53657e-09	0.632809	0.461367	0.192161	0.121229	2.56249	2.13767	1.39899	1.50323
ENSMUSG00000021116	Eif2s1	-1.35849	8.53663e-09	2.47564	2.18843	1.28433	1.18208	16.131	13.9094	6.51218	6.04232
ENSMUSG00000027808	Serp1	-1.56375	8.59754e-09	4.15371	4.87197	2.24155	1.86441	14.4468	16.0511	6.73537	5.58208
ENSMUSG00000012396	Nanog	-1.19268	8.85795e-09	18.216	19.9043	11.4462	11.1647	38.4469	41.567	24.3289	24.2188
ENSMUSG00000025156	Gps1	-2.4876	9.38656e-09	1.36335	1.50813	0.384439	0.294867	12.3667	11.7444	4.68746	3.44011
ENSMUSG00000000486	Septin1	-1.62229	9.48368e-09	0.973308	1.133	0.470851	0.45382	17.6599	17.8025	5.46536	4.20419
ENSMUSG00000029642	Polr1d	-1.46646	9.7874e-09	0.983583	1.13249	0.560213	0.471229	5.89644	6.29345	3.29526	3.46942
ENSMUSG00000039748	Exo1	-1.66489	9.89315e-09	0.575618	0.608392	0.273265	0.228798	1.86146	1.99427	0.785142	0.68021
ENSMUSG00000032330	Cox7a2	-1.41757	9.91917e-09	7.22449	7.04725	3.39675	3.88864	107.58	102.649	62.6416	76.8419
ENSMUSG00000071041	Impdh2-ps	-1.5225	1.01478e-08	28.1811	29.5939	15.6482	11.3714	336.966	310.198	189.424	126.754
ENSMUSG00000030079	Ruvbl1	-1.87427	1.09248e-08	0.443978	0.374561	0.152967	0.149738	4.05379	3.80447	1.37974	1.16838
ENSMUSG00000115017	Gm2573	-2.98965	1.17456e-08	13.93	16.5972	2.76647	2.34644	152.497	134.22	32.2755	24.7443
ENSMUSG00000024911	Fibp	-3.29023	1.19803e-08	0.94582	1.04729	0.168899	0.0917288	10.6142	9.96868	1.21901	1.36064
ENSMUSG00000014763	Fam120b	-4.65727	1.22356e-08	0.0623682	0.11203	0.00522972	0.0036292	0.204256	0.248614	0.0418377	0.0889155
ENSMUSG00000098140	Gm26938	-2.32798	1.31498e-08	0.433272	0.438901	0.134362	0.0956956	1.68249	1.83342	0.565736	0.507923
ENSMUSG00000024528	Srfbp1	-1.5233	1.33803e-08	0.881879	0.916093	0.437104	0.408464	1.91925	1.99179	1.0257	1.02116
ENSMUSG00000021911	Parg	-2.23559	1.37524e-08	0.0841352	0.0924116	0.0279471	0.0219957	0.422505	0.463858	0.154731	0.158227
ENSMUSG00000082809	Gm14150	-1.9208	1.40731e-08	17.6494	17.9223	8.10962	4.35857	152.861	154.861	72.7941	38.8765
ENSMUSG00000020108	Ddit4	2.54186	1.41151e-08	0.457463	0.874034	4.36244	6.23216	1.48003	1.61564	10.7707	13.9049
ENSMUSG00000053740	Gm6457	-3.8461	1.41959e-08	12.5576	6.41314	1.32451	0.275746	121.311	99.2287	13.1788	4.68768
ENSMUSG00000015733	Capza2	-1.27653	1.44261e-08	2.58068	2.30862	1.38858	1.35274	14.7275	13.3646	7.71987	6.74164
ENSMUSG00000063229	Ldha	-1.41077	1.44775e-08	5.72442	5.26948	3.16551	2.4156	132.531	127.736	79.5245	61.4014
ENSMUSG00000106530	Gm42430	-2.23773	1.48433e-08	11.9222	14.3421	3.86128	3.63393	60.5571	61.0005	24.4372	19.4911
ENSMUSG00000071867	Mrpl27-ps	-5.18615	1.54041e-08	7.04128	6.41705	0.218677	0.303505	44.7252	47.6145	2.62412	2.8833
ENSMUSG00000025209	Twnk	-2.83734	1.55574e-08	0.673164	0.880726	0.169798	0.114648	8.20111	8.59718	1.56031	1.72927
ENSMUSG00000099647	Gm5776	-2.25797	1.56969e-08	21.6076	30.5607	7.0038	7.81881	238.41	224.47	77.1433	80.0899
ENSMUSG00000035637	Grhpr	-2.97553	1.58474e-08	0.592847	0.608081	0.136053	0.0581014	11.0706	10.9946	2.56058	1.84472
ENSMUSG00000017499	Cdc6	-1.57562	1.59524e-08	1.59619	1.54973	0.789338	0.630422	3.69796	3.71793	1.85726	1.65591
ENSMUSG00000081712	Gm12096	-1.69689	1.61168e-08	14.9006	16.1171	6.97574	5.88257	48.3875	54.0517	23.8117	19.6699
ENSMUSG00000052253	Zfp622	-2.22202	1.63263e-08	0.668912	0.646187	0.223898	0.148968	1.89938	2.00359	0.690159	0.605484
ENSMUSG00000032199	Polr2m	-1.48478	1.65385e-08	5.0366	5.97476	2.98065	2.30664	32.3337	35.4049	16.0199	10.8005
ENSMUSG00000071662	Polr2g	-1.70124	1.69065e-08	7.378	6.11467	3.38919	2.17774	34.6659	31.0154	16.9818	16.277
ENSMUSG00000037349	Nudt22	-3.78128	1.76401e-08	1.07171	1.27691	0.147149	0.0656453	5.33977	5.95891	0.756764	0.678334
ENSMUSG00000024273	2700062C07Rik	-1.8042	1.76429e-08	1.9124	1.84926	0.736151	0.722359	4.59646	4.47455	1.83334	1.90351
ENSMUSG00000049305	Ccdc71	-3.07569	1.79844e-08	1.09852	1.11302	0.252861	0.0752034	3.09093	3.69948	0.680315	0.350949
ENSMUSG00000024081	Cebpz	-1.56895	1.81119e-08	1.18438	1.17526	0.566471	0.507032	13.7736	14.1221	14.1401	14.3359
ENSMUSG00000029265	Dr1	-1.83296	1.86392e-08	1.09756	1.14441	0.369814	0.495773	2.33044	2.37267	0.756438	1.00904
ENSMUSG00000092607	Scnm1	-1.90693	1.94408e-08	2.69554	2.40958	0.909933	0.939605	14.3111	13.6115	4.98643	5.25876
ENSMUSG00000020708	Psmc5	-1.53244	1.99042e-08	6.07374	5.79695	3.2176	2.29779	69.2959	68.1883	31.0723	22.6079
ENSMUSG00000081255	Gm5380	-2.09675	2.00045e-08	6.30342	7.06362	2.68473	1.42908	76.0776	81.5136	35.9541	18.4192
ENSMUSG00000001844	Zdhhc4	-2.37301	2.00445e-08	0.593453	0.516711	0.150563	0.138132	4.31394	4.15615	1.47501	1.22194
ENSMUSG00000024271	Elp2	-2.30916	2.02274e-08	0.276781	0.236413	0.0862546	0.0499837	3.95446	3.58063	0.68559	0.557226
ENSMUSG00000029911	Ssbp1	-1.67802	2.0808e-08	1.48019	1.22051	0.580922	0.564051	10.9639	9.7727	3.43916	4.00425
ENSMUSG00000003038	Hmgn2	-1.44295	2.09856e-08	11.0972	11.157	6.20349	4.81924	45.342	43.6897	32.3581	21.8946
ENSMUSG00000028899	Taf12	-1.82891	2.151e-08	0.544934	0.600716	0.217808	0.218797	3.77639	3.7223	1.02812	0.935437
ENSMUSG00000021532	Fastkd3	-1.55496	2.19019e-08	2.98785	2.58314	1.40908	1.1479	6.43138	5.92703	2.51183	2.23538
ENSMUSG00000060149	BC002059	-2.55584	2.23295e-08	0.430223	0.405699	0.132492	0.0509688	0.785736	0.770829	0.236181	0.191882
ENSMUSG00000059486	Kbtbd2	-1.68429	2.23723e-08	0.738272	0.896293	0.354895	0.330976	1.19502	1.43916	0.674461	0.785651
ENSMUSG00000072772	Grcc10	-2.65186	2.32597e-08	2.92494	2.82655	0.758087	0.433243	77.6706	76.055	30.0262	33.9167
ENSMUSG00000021139	Gm20498	-1.75309	2.37243e-08	0.115202	0.103829	0.0507335	0.0362462	0.580363	0.561666	0.278566	0.299713
ENSMUSG00000064193	Gm4735	-1.92762	2.37349e-08	15.2207	14.0998	6.53159	3.69906	332.303	316.628	178.856	93.1537
ENSMUSG00000043483	Gm6863	-1.19947	2.44747e-08	176.142	173.458	106.97	99.4037	1571.07	1561.85	1017.55	1005.88
ENSMUSG00000001175	Calm1	-1.34454	2.4531e-08	7.14258	6.49402	3.98026	3.28058	71.8414	63.2766	32.3757	26.1335
ENSMUSG00000022945	Chaf1b	-1.7684	2.46321e-08	0.592963	0.622363	0.24934	0.232066	5.1084	5.52896	1.80552	1.42598
ENSMUSG00000028890	Mtf1	-2.09859	2.46321e-08	0.189411	0.17801	0.0546498	0.0625757	0.740538	0.749324	0.372985	0.489228
ENSMUSG00000021650	Ptcd2	-1.76954	2.48052e-08	0.602423	0.542572	0.239245	0.213849	2.28874	2.14511	0.981686	0.95826
ENSMUSG00000048410	Zfp407	-2.17364	2.56741e-08	0.021335	0.0182655	0.00670431	0.00499533	0.0435538	0.0369037	0.0401553	0.0696407
ENSMUSG00000004268	Emg1	-1.28809	2.56741e-08	10.2472	10.0008	6.08262	5.12899	68.7351	65.6327	39.5833	33.5563
ENSMUSG00000020372	Rack1	-1.30584	2.68688e-08	18.184	18.1985	11.1048	8.76955	283.351	284.558	216.997	197.02
ENSMUSG00000031796	Cfap20	-1.63795	2.70459e-08	2.2085	1.90299	1.04517	0.728394	12.8404	11.8221	5.03864	3.96673
ENSMUSG00000009535	Rnmt	-1.39807	2.81186e-08	1.23957	1.27158	0.663681	0.62578	7.47551	7.15876	3.39555	2.55019
ENSMUSG00000084106	Gm6136	-1.46423	2.81337e-08	49.5204	46.7446	26.7319	20.2511	638.4	621.008	521.728	395.657
ENSMUSG00000026849	Tor1a	-2.34464	3.02361e-08	1.93038	1.23263	0.535096	0.287784	5.73529	3.7293	1.35558	0.974752
ENSMUSG00000035455	Fignl1	-1.32015	3.0248e-08	2.11413	1.96095	1.12433	1.09002	5.01328	4.67324	2.43327	2.57069
ENSMUSG00000036873	2410004B18Rik	-1.65911	3.0248e-08	2.1806	2.49977	0.927388	1.09473	5.74652	6.21154	2.22764	2.33874
ENSMUSG00000030879	Mrpl17	-1.43944	3.0248e-08	6.18008	5.06534	3.03375	2.57791	36.8294	34.2292	18.1653	16.1635
ENSMUSG00000071359	Tbpl1	-1.83461	3.08496e-08	0.402976	0.453877	0.147471	0.181308	1.23593	1.15718	0.45983	0.478654
ENSMUSG00000101841	Gm11993	-1.85804	3.08948e-08	24.8782	20.4987	10.1722	6.53517	159.15	138.524	64.4505	40.2864
ENSMUSG00000029152	Ociad1	-1.72949	3.08948e-08	1.11994	0.838184	0.442378	0.353731	4.54	3.66806	1.91799	1.51371
ENSMUSG00000034893	Cog3	-3.19641	3.08994e-08	0.0759153	0.0791152	0.0112335	0.0116934	0.208767	0.254927	0.0792589	0.126029
ENSMUSG00000024835	Coro1b	-2.40721	3.0996e-08	1.66778	1.60975	0.541344	0.262969	25.1673	25.0676	8.26452	5.52234
ENSMUSG00000026127	Imp4	-1.53437	3.1725e-08	4.05906	4.00722	2.1971	1.54134	26.8744	25.5641	11.1123	7.89939
ENSMUSG00000045752	Tssc4	-2.09642	3.17537e-08	4.95985	5.06832	1.76601	1.36035	15.7641	15.1117	6.05741	4.04427
ENSMUSG00000018648	Dusp14	-1.66207	3.20305e-08	0.997026	0.811014	0.34086	0.444317	2.29618	2.24651	1.59682	1.86357
ENSMUSG00000095661	Gm8935	-1.45837	3.27228e-08	8.29089	8.65242	4.14564	4.21838	12.3113	12.302	6.17188	6.25483
ENSMUSG00000080818	Gm9434	-1.86667	3.35766e-08	15.7724	15.1007	6.33222	5.00616	30.0392	29.3546	12.8648	10.5129
ENSMUSG00000040618	Pck2	-3.23256	3.45254e-08	0.35576	0.418099	0.0682706	0.0370776	3.25494	3.10439	0.997344	0.716833
ENSMUSG00000026273	Mterf4	-1.98621	3.48484e-08	1.44303	1.52298	0.539403	0.465375	3.08599	3.11441	1.24403	1.0825
ENSMUSG00000028044	Cks1b	-1.19978	3.48656e-08	27.6019	26.0837	15.1501	16.6788	139.05	135.423	77.1158	84.3725
ENSMUSG00000019797	Mtres1	-1.88333	3.48757e-08	0.679797	0.698027	0.256768	0.248035	3.00581	2.89338	1.17703	1.12044
ENSMUSG00000026701	Prdx6	-1.43166	3.50598e-08	4.16105	4.6688	2.51382	1.88698	52.0315	50.6957	32.0608	22.949
ENSMUSG00000099902	Gm12115	-1.4265	3.56325e-08	61.6764	59.6785	28.1364	33.5373	466.42	453.942	169.766	188.325
ENSMUSG00000041716	Gm20604	-1.33509	3.63327e-08	2.17098	2.0623	1.10206	1.18121	6.65744	6.98268	3.54082	4.34845
ENSMUSG00000029246	Ppat	-1.39772	3.68052e-08	0.840915	0.871078	0.466684	0.410575	4.68053	4.60683	2.08945	1.78919
ENSMUSG00000030042	Pole4	-1.21251	3.68271e-08	1.04731	1.01554	0.627711	0.5788	3.27419	3.22263	2.12532	2.07802
ENSMUSG00000063902	Gm7964	-1.78323	3.68343e-08	20.0068	18.9008	9.5526	5.51331	329.795	314.902	155.679	78.417
ENSMUSG00000080727	C920021L13Rik	1.58645	3.71386e-08	0.391093	0.463227	1.49148	2.01348	2.7244	2.9229	5.68061	7.39047
ENSMUSG00000024896	Minpp1	-3.13294	3.75061e-08	0.141796	0.141502	0.0242203	0.0183358	0.555369	0.662927	0.0814682	0.121475
ENSMUSG00000028419	Chmp5	-1.62097	3.85657e-08	0.958961	1.27659	0.458941	0.529917	6.89555	7.08235	3.03711	3.15943
ENSMUSG00000113346	Eprn	-1.65203	3.86199e-08	6.60915	6.02618	2.95796	2.4538	19.8477	18.9166	7.80856	7.12546
ENSMUSG00000041359	Tcl1	-1.87543	3.88082e-08	2.72915	2.47736	1.14827	0.740736	17.8697	16.4778	6.21576	4.99435
ENSMUSG00000014771	Pdcd2	-1.85536	3.88297e-08	1.92271	1.50261	0.696422	0.578269	7.69804	7.16574	3.43783	3.24333
ENSMUSG00000063334	Krr1	-1.53933	3.97077e-08	1.38979	1.44067	0.71286	0.597936	5.43718	5.66081	2.23983	1.87124
ENSMUSG00000019970	Sgk1	-1.13688	4.05278e-08	0.970446	1.05214	0.616396	0.632121	1.54974	1.72856	1.07087	1.13113
ENSMUSG00000026831	Pierce1	1.81301	4.12747e-08	1.18402	1.19186	6.5963	4.63497	5.27428	5.04556	21.91	17.9762
ENSMUSG00000026869	Psmd5	-1.45159	4.21088e-08	1.34889	1.30037	0.724351	0.580623	6.23398	5.89257	2.73859	2.03756
ENSMUSG00000006818	Sod2	-1.44933	4.29442e-08	0.743974	0.7668	0.388429	0.359404	8.70134	8.48316	5.1045	4.52727
ENSMUSG00000018858	Mrpl58	-2.21081	4.36472e-08	1.17578	0.951533	0.372459	0.235665	9.69368	9.46389	3.58583	3.05604
ENSMUSG00000006715	Gmnn	-1.41386	4.46346e-08	3.77625	3.53465	2.02693	1.67581	15.7816	14.9013	7.38037	6.45424
ENSMUSG00000024999	Noc3l	-2.57185	4.59252e-08	0.192976	0.224974	0.0586513	0.0327066	1.04919	1.0843	0.275452	0.289998
ENSMUSG00000061062	Hdac1-ps	-1.70484	4.63667e-08	10.7369	13.0311	5.48313	4.27482	221.52	209.728	101.404	60.881
ENSMUSG00000019505	Ubb	-1.41038	4.81629e-08	99.3975	89.8294	57.1117	38.9469	680.519	611.256	402.637	301.847
ENSMUSG00000012422	Tmem167	-1.30918	4.83829e-08	0.69154	0.695311	0.383608	0.375167	2.77042	2.78857	1.3798	1.50067
ENSMUSG00000021681	Aggf1	-2.14576	4.8568e-08	0.375659	0.462761	0.155848	0.0934875	1.59714	1.76733	0.699997	0.478436
ENSMUSG00000115730	Gm7459	-1.61107	5.07873e-08	9.63864	9.00773	4.19078	4.07907	61.9209	52.609	24.7456	16.7317
ENSMUSG00000038279	Nop2	-1.68198	5.09354e-08	3.23081	3.69802	1.83651	1.04562	13.3407	14.7876	6.96049	5.08553
ENSMUSG00000069089	Cdk7	-1.45106	5.09621e-08	1.45978	1.28481	0.75734	0.596649	4.20227	3.8909	1.97622	1.86183
ENSMUSG00000022913	Psmg1	-1.63997	5.13384e-08	1.41117	1.41496	0.629321	0.596649	17.4679	15.3097	6.19571	5.64663
ENSMUSG00000028232	Tmem68	-2.29471	5.23574e-08	0.23935	0.320035	0.0795228	0.0735806	0.480957	0.493387	0.181766	0.183951
ENSMUSG00000031629	Cenpu	-2.10108	5.24442e-08	0.274974	0.317802	0.085009	0.104247	2.03314	1.95397	0.609037	0.552753
ENSMUSG00000003868	Ruvbl2	-1.5604	5.38089e-08	2.54023	2.34924	1.33626	0.888557	31.1713	28.4858	13.5162	9.28002
ENSMUSG00000032366	Tpm1	-1.71715	5.4539e-08	0.504247	0.489889	0.202906	0.207418	4.31001	4.21647	2.12869	1.58346
ENSMUSG00000038812	Trmt112	-2.8212	5.50976e-08	3.53511	4.37052	0.939891	0.501727	35.7822	37.6374	5.18145	4.41519
ENSMUSG00000022849	Hspbap1	-1.44889	5.52164e-08	0.682144	0.763227	0.408807	0.302374	2.43064	2.45358	1.18941	0.919965
ENSMUSG00000026643	Nmt2	-1.61805	5.52164e-08	0.337978	0.362197	0.146625	0.164018	3.09269	2.97464	1.22698	1.15572
ENSMUSG00000038005	Hpf1	-1.70158	5.55868e-08	0.814231	0.735412	0.32308	0.323299	8.40734	7.70297	3.23437	2.80564
ENSMUSG00000021428	Riok1	-1.82536	5.60349e-08	0.500843	0.483567	0.201318	0.172089	1.99145	1.96948	0.638619	0.652271
ENSMUSG00000039033	Tasp1	-2.16591	5.60918e-08	0.0342234	0.0351597	0.0115906	0.00901244	0.112413	0.115806	0.0748499	0.106405
ENSMUSG00000038671	Arfrp1	-2.48193	5.65141e-08	0.90659	0.892315	0.270292	0.149471	6.20259	5.63646	1.26277	0.852864
ENSMUSG00000001707	Eef1e1	-1.16327	5.80997e-08	6.05938	5.82491	3.55841	3.65383	15.0503	14.2571	7.93731	8.18002
ENSMUSG00000084957	Bbip1	-2.62248	5.82245e-08	0.390759	0.337987	0.0816392	0.0780909	2.77083	2.68836	0.51852	0.666069
ENSMUSG00000035762	Tmem161b	-2.20343	5.90014e-08	0.11208	0.0940007	0.0282386	0.0330689	0.274674	0.243936	0.101924	0.151566
ENSMUSG00000063281	Zfp35	-1.61312	5.90014e-08	1.05134	1.24611	0.544255	0.465291	2.47656	2.70719	1.35133	1.28817
ENSMUSG00000043618	Eif5al3-ps	-1.75444	5.90367e-08	82.4091	79.6997	41.6215	22.4594	1117.74	1026.6	663.32	341.899
ENSMUSG00000050490	Psma5-ps	-1.40127	6.07395e-08	35.2656	32.2999	18.345	16.2458	271.594	242.55	127.662	106.738
ENSMUSG00000036513	Commd2	-1.73317	6.08812e-08	2.57133	2.01689	1.02167	0.837904	9.55745	8.19994	3.31269	2.81757
ENSMUSG00000028069	Gpatch4	-2.21614	6.20195e-08	0.710145	0.845879	0.285726	0.152659	3.41051	3.66844	1.41093	1.0265
ENSMUSG00000095588	Gm12350	-1.45892	6.2139e-08	83.1398	77.733	44.8544	33.9167	987.585	977.871	782.765	676.572
ENSMUSG00000095159	Tubb4b-ps1	-1.66589	6.30798e-08	17.7127	19.7526	9.56025	6.19437	81.1033	82.0592	36.8265	21.9342
ENSMUSG00000031633	Slc25a4	-1.47919	6.30952e-08	13.0001	11.2104	6.8607	4.83661	128.014	119.53	72.767	57.3289
ENSMUSG00000037601	Nme1	-1.26869	6.31497e-08	4.25671	4.07041	2.40497	2.28012	56.327	52.5078	36.9835	35.6768
ENSMUSG00000120796	ENSMUSG00000120796	-2.12381	6.35671e-08	13.1978	11.6379	5.10136	2.39815	63.9284	57.803	26.1102	14.1605
ENSMUSG00000098530	Gm28051	-1.29891	6.3578e-08	0.994803	0.96244	0.52852	0.552848	3.02759	3.22281	1.76317	2.15396
ENSMUSG00000044018	Mrpl50	-1.25079	6.3578e-08	5.28814	5.23863	2.91781	3.09713	14.815	13.6434	7.62235	8.07807
ENSMUSG00000022706	Mrpl40	-1.45237	6.53825e-08	5.90681	5.49411	3.033	2.59013	40.9627	38.8376	17.8617	17.9909
ENSMUSG00000018882	Mrpl45	-1.3451	6.54722e-08	3.02817	3.20665	1.81437	1.49468	23.8356	23.4805	14.219	10.9641
ENSMUSG00000021403	Serpinb9b	-2.46143	6.59709e-08	0.410892	0.424246	0.112595	0.0890756	0.813726	0.74937	0.252214	0.23441
ENSMUSG00000058581	Gm5801	-1.90313	6.59709e-08	13.8243	13.9744	5.51403	4.43526	38.1849	43.247	13.8268	8.4357
ENSMUSG00000045273	Cenph	-2.2163	6.6654e-08	0.563967	0.42427	0.152613	0.133777	7.20944	6.75297	3.47195	3.74576
ENSMUSG00000097565	Gm26965	-2.10989	6.66756e-08	0.308084	0.291759	0.115437	0.0678334	0.489604	0.532707	0.283937	0.265519
ENSMUSG00000080989	Gm14048	-1.69256	6.69927e-08	23.5811	24.2504	12.4113	7.32901	209.104	198.482	91.0933	48.4677
ENSMUSG00000028179	Cth	-1.39533	6.87898e-08	1.22131	1.15556	0.66899	0.55006	9.84229	9.15699	4.63643	3.6194
ENSMUSG00000101188	Eif4a-ps4	-1.22927	7.1848e-08	93.9853	91.5634	58.4245	48.6195	812.082	778.901	443.186	327.026
ENSMUSG00000067931	Zfp948	-2.41263	7.34362e-08	0.292882	0.269757	0.0736014	0.0687966	0.540085	0.568606	0.178746	0.259551
ENSMUSG00000033918	Parl	-2.02043	7.40772e-08	0.413194	0.470233	0.168906	0.120219	4.51931	3.75932	1.46096	1.22022
ENSMUSG00000000827	Tpd52l2	-1.5695	7.45788e-08	1.18951	1.17354	0.618019	0.449508	9.40136	8.50402	3.97879	3.21822
ENSMUSG00000074088	Snrnp40	-1.48974	7.45788e-08	1.10353	1.14564	0.623429	0.451542	8.91206	8.32077	3.21633	2.70018
ENSMUSG00000040044	Orc3	-2.22669	7.72296e-08	0.195392	0.163728	0.0590417	0.043021	2.58894	2.19993	0.553516	0.439429
ENSMUSG00000110644	Gm7390	-2.4004	7.76057e-08	5.84779	6.36903	1.95604	1.0599	65.1885	59.7273	24.8927	10.7663
ENSMUSG00000094530	Gm21399	-1.12309	7.79202e-08	290.747	292.031	187.911	174.867	3389.87	3125.95	2377.62	2204.64
ENSMUSG00000028211	Trp53inp1	1.21075	7.80159e-08	1.47753	1.5086	4.77969	4.59555	3.42268	3.72676	11.2168	11.1147
ENSMUSG00000049460	Gm8396	-1.90804	7.84737e-08	12.2521	12.4077	4.71126	4.12111	33.4278	35.6897	11.0457	9.64339
ENSMUSG00000063543	Gm5616	-2.43156	8.20659e-08	16.0894	16.7325	3.22435	5.29949	96.3847	108.462	25.5402	24.0243
ENSMUSG00000020691	Mettl2	-2.03381	8.24919e-08	0.776036	0.944505	0.349852	0.203937	3.28355	3.02242	1.14518	0.616668
ENSMUSG00000025574	Tk1	-1.95487	8.26584e-08	1.11972	0.933791	0.400849	0.30813	7.93182	7.19887	2.90153	2.29171
ENSMUSG00000067148	Polr1c	-1.47488	8.26584e-08	16.0551	16.3295	9.47937	6.16817	57.8492	56.5499	32.7956	25.296
ENSMUSG00000009863	Sdhb	-1.52582	8.33737e-08	1.65875	1.48914	0.840334	0.629658	15.6188	13.9188	6.94906	6.20232
ENSMUSG00000080893	Ndufa12-ps	-1.70702	8.34369e-08	32.4779	37.5321	15.4809	13.3304	358.271	347.207	173.289	158.615
ENSMUSG00000022109	Med4	-1.5629	8.51799e-08	3.5335	3.35435	1.85713	1.26827	9.12104	8.36636	5.09511	3.84325
ENSMUSG00000040351	Ankib1	-2.88163	8.626e-08	0.0350979	0.0436895	0.00721333	0.00720827	0.0789702	0.0980474	0.0830975	0.103319
ENSMUSG00000041035	Dpcd	-3.00083	8.72055e-08	0.219155	0.2187	0.0306278	0.0460512	2.65726	2.52554	0.791218	0.623463
ENSMUSG00000030327	Necap1	-1.48297	8.75288e-08	1.57922	1.67331	0.853533	0.712654	3.12621	3.35059	1.92552	1.82383
ENSMUSG00000029177	Cenpa	-1.34516	8.96738e-08	5.60138	5.14991	3.10698	2.61092	36.93	34.9738	21.6194	17.2068
ENSMUSG00000086147	Zfp989	-2.12948	9.07963e-08	0.474855	0.409338	0.150943	0.119196	0.763493	0.696485	0.327911	0.263676
ENSMUSG00000023456	Tpi1	-1.48285	9.19078e-08	6.7066	6.10631	3.31887	2.86981	176.084	176.465	90.3207	66.7184
ENSMUSG00000017664	Slc35c2	-3.77988	9.38431e-08	0.298745	0.294041	0.0403111	0.0119889	1.95214	1.74397	0.115175	0.0839226
ENSMUSG00000001416	Cct3	-1.3074	9.63362e-08	2.82068	2.79721	1.71955	1.3428	34.5173	32.4635	17.1849	12.176
ENSMUSG00000035958	Tdp2	-1.58629	9.72072e-08	2.52063	2.4919	1.3282	0.906604	7.38384	6.99374	3.45892	2.92704
ENSMUSG00000079184	Mphosph8	-1.4335	1.01125e-07	0.876799	1.0006	0.508008	0.427693	4.6716	4.83001	2.50431	2.3802
ENSMUSG00000091655	Gm8741	-2.44321	1.02336e-07	14.268	19.571	4.83652	3.35634	104.733	100.544	26.0493	21.0213
ENSMUSG00000027940	Tpm3	-1.71155	1.05599e-07	1.02734	1.01929	0.530478	0.302506	9.1615	9.3482	4.44794	3.08028
ENSMUSG00000078952	Lncenc1	-1.29542	1.08858e-07	0.725129	0.656304	0.407561	0.354073	2.40632	2.49101	1.61482	1.60525
ENSMUSG00000055681	Cope	-1.73792	1.10143e-07	2.57047	2.00976	1.12591	0.712264	28.57	25.0809	10.2887	8.22989
ENSMUSG00000061371	Zfp873	-2.38187	1.10151e-07	0.389206	0.358919	0.105846	0.0856946	0.739841	0.641913	0.280296	0.363182
ENSMUSG00000087174	5530601H04Rik	-2.74898	1.14279e-07	0.134677	0.100093	0.0199739	0.0287884	0.351809	0.33139	0.080664	0.0895639
ENSMUSG00000038646	Ramac	-1.63015	1.14348e-07	2.5118	2.39363	1.16102	0.970967	7.15375	6.31603	3.02162	2.71664
ENSMUSG00000045102	Poln	-1.39116	1.18479e-07	0.22234	0.182779	0.0955781	0.115794	0.446476	0.385002	0.24276	0.319374
ENSMUSG00000028688	Toe1	-1.75111	1.21509e-07	0.975007	0.946744	0.420393	0.346011	3.12177	3.03819	1.56425	1.37387
ENSMUSG00000011267	Zfp296	-1.40042	1.24526e-07	8.2673	9.43089	4.90194	4.12637	18.6447	21.3472	11.7762	11.574
ENSMUSG00000025872	Thoc3	-1.68006	1.26665e-07	2.92799	3.12825	1.59774	0.921337	18.4818	18.1507	8.89009	5.47383
ENSMUSG00000034391	Fbxo15	-1.30789	1.2864e-07	0.787685	0.772825	0.447306	0.405327	3.10205	2.90946	1.77108	1.6155
ENSMUSG00000059355	Wdr83os	-2.73609	1.3052e-07	3.7886	2.65329	0.733115	0.551147	30.491	26.999	6.94423	6.2322
ENSMUSG00000039985	Sinhcaf	-1.41417	1.32301e-07	1.16879	1.16392	0.650812	0.528094	3.42388	3.76245	1.99343	1.69364
ENSMUSG00000025737	Wdr24	-4.61395	1.36489e-07	0.548146	0.505795	0.0383028	0.0132902	2.75215	2.67509	0.31919	0.239224
ENSMUSG00000030591	Psmd8	-1.55995	1.37882e-07	3.00647	3.32902	1.63064	1.24962	47.6114	46.6768	25.8402	20.7541
ENSMUSG00000109865	Hspa14	-1.53178	1.38009e-07	1.756	1.477	0.894619	0.608562	12.6398	11.3875	4.61449	3.4221
ENSMUSG00000003198	Zfp959	-2.35247	1.40622e-07	0.937899	0.906347	0.271683	0.208382	1.70527	1.51058	0.510001	0.575532
ENSMUSG00000074221	Zfp568	-1.54637	1.43787e-07	0.544362	0.700151	0.330033	0.240251	1.32014	1.65267	0.852647	0.687087
ENSMUSG00000032715	Trib3	-1.82677	1.47819e-07	2.32757	2.51654	1.13357	0.677206	4.70803	5.38019	2.76987	1.87771
ENSMUSG00000078941	Ak6	-1.21094	1.48586e-07	3.86149	3.97972	2.41708	2.16541	16.0485	15.6466	8.20662	8.21181
ENSMUSG00000019432	Ddx39b	-1.41894	1.50025e-07	3.15745	3.44345	1.91488	1.40067	38.0161	37.8539	18.4188	12.9973
ENSMUSG00000048007	Timm8a1	-2.29958	1.53331e-07	1.69422	1.24443	0.388733	0.426718	4.18497	3.8453	1.10966	0.853436
ENSMUSG00000028668	Eloa	-1.9129	1.53389e-07	0.516452	0.50832	0.19306	0.173308	1.24836	1.34097	0.859029	0.973474
ENSMUSG00000030735	Gm9755	-1.97829	1.61419e-07	8.8117	8.3345	3.6043	2.15106	75.9096	73.6143	19.7996	10.7553
ENSMUSG00000031667	Aktip	-1.8955	1.64545e-07	0.131518	0.122292	0.0532008	0.0376882	0.86577	0.810507	0.417848	0.434568
ENSMUSG00000062580	Timm17a	-1.23514	1.66522e-07	2.58687	2.47507	1.5005	1.41396	7.82026	7.82381	3.98029	4.24187
ENSMUSG00000017837	Nkiras2	-2.15321	1.81965e-07	0.891993	0.86423	0.292171	0.235195	5.97914	6.22794	2.64122	1.89778
ENSMUSG00000024785	Rcl1	-1.5687	1.81965e-07	0.447881	0.426	0.220512	0.175342	2.7407	2.78652	1.28479	0.921342
ENSMUSG00000004561	Mettl17	-2.47877	1.87973e-07	0.817627	0.58782	0.162954	0.182037	3.15675	3.03707	0.655791	0.47164
ENSMUSG00000043024	Gm16433	-2.02341	1.88842e-07	8.31401	9.57104	4.00717	1.77789	51.5292	46.9299	20.6763	11.1118
ENSMUSG00000018326	Ywhab	-1.43393	1.89745e-07	0.853486	1.00757	0.477112	0.453582	9.11947	9.8572	4.2485	3.27555
ENSMUSG00000051735	Rinl	-3.00998	1.92954e-07	0.373218	0.407519	0.0684583	0.0610806	2.24514	2.20405	0.466168	0.515792
ENSMUSG00000082321	Gm14253	-1.51928	1.97975e-07	37.3068	35.5523	19.4783	14.6495	120.312	109.799	54.9167	49.2562
ENSMUSG00000031299	Pdha1	-1.36827	1.99998e-07	1.97464	1.93293	1.11592	0.925096	22.8936	21.988	11.9333	8.41796
ENSMUSG00000031879	Ciao2b	-2.19409	2.0427e-07	3.6155	2.93851	0.934002	1.02005	37.9627	35.1274	10.2128	9.49923
ENSMUSG00000031821	Gins2	-1.69515	2.0427e-07	1.85148	1.73094	0.897617	0.578415	21.2074	20.137	11.1408	9.25464
ENSMUSG00000037544	Dlgap5	-1.89137	2.04305e-07	0.376789	0.397078	0.168079	0.108519	2.27215	2.3806	0.92869	0.648901
ENSMUSG00000032567	Aste1	-2.34727	2.05156e-07	0.363466	0.378186	0.112235	0.0805718	1.02117	1.06301	0.377341	0.374659
ENSMUSG00000002102	Psmc3	-1.40417	2.0656e-07	3.17813	3.01206	1.80298	1.34449	35.3178	34.228	18.586	13.2583
ENSMUSG00000028792	Ak2	-1.89479	2.11385e-07	0.783224	0.908656	0.392886	0.20795	11.5131	12.0148	5.27233	3.17124
ENSMUSG00000032126	Hmbs	-2.23757	2.11385e-07	0.753509	0.952505	0.260168	0.223532	10.6599	10.3394	3.15505	2.02039
ENSMUSG00000038206	Fbxo8	-1.76276	2.12947e-07	0.28429	0.24902	0.0980908	0.117145	0.843347	0.814002	0.272981	0.32769
ENSMUSG00000024097	Srsf7	-1.10458	2.14529e-07	23.2161	21.1838	14.2449	13.8051	116.79	103.831	61.2214	58.0732
ENSMUSG00000084133	Gm12856	-1.78236	2.2428e-07	9.15088	10.8259	4.4855	3.25265	33.8988	34.0306	13.7337	9.44317
ENSMUSG00000048164	Gm7204	-1.31273	2.31019e-07	65.6086	62.2692	37.604	31.9283	467.559	445.686	318.079	283.605
ENSMUSG00000007872	Id3	-1.49317	2.37698e-07	46.9076	45.6865	27.8375	16.3353	102.665	105.518	63.8676	42.3996
ENSMUSG00000020397	Med7	-1.2915	2.40156e-07	7.50069	6.27421	3.79394	3.86149	12.3771	11.3312	6.30636	7.00918
ENSMUSG00000010054	Tusc2	-2.54499	2.43518e-07	2.14137	2.62955	0.741038	0.30855	8.5451	8.33026	2.12051	1.78009
ENSMUSG00000029198	Grpel1	-1.26227	2.49586e-07	7.10369	6.70761	4.29751	3.48017	33.8949	32.5907	18.6393	16.191
ENSMUSG00000029918	Mrps33	-1.63748	2.57669e-07	1.67529	1.60519	0.787523	0.627745	11.8666	11.1239	4.40587	4.99242
ENSMUSG00000000776	Polr3d	-1.90322	2.60804e-07	2.32349	2.43366	1.02104	0.665175	5.77767	6.86073	3.11868	2.24135
ENSMUSG00000022241	Tars	-1.56106	2.65446e-07	1.12779	1.0803	0.570412	0.433603	13.9531	13.4229	6.72673	4.73838
ENSMUSG00000034437	Gm9761	-1.44078	2.68503e-07	104.252	102.494	61.5896	40.6725	418.784	406.476	255.233	190.816
ENSMUSG00000048261	Gm4879	-1.59901	2.6942e-07	15.3505	14.7029	7.73587	5.54613	90.9576	81.9484	38.6794	27.464
ENSMUSG00000028370	Pappa	1.89101	2.71047e-07	0.021982	0.03565	0.0960719	0.197393	1.21051	1.91059	2.9968	5.02407
ENSMUSG00000027865	Gdap2	-4.74884	2.73909e-07	0.0640349	0.0501641	0.00365271	0.00152089	0.326709	0.321565	0.0423714	0.0425851
ENSMUSG00000032279	Idh3a	-1.42875	2.73909e-07	1.33249	1.22387	0.686217	0.595874	12.5998	11.4311	4.70219	3.7788
ENSMUSG00000002010	Idh3g	-1.61831	2.75869e-07	2.53418	2.24847	1.21544	0.871961	41.3035	37.7829	22.461	17.747
ENSMUSG00000022684	Bfar	-1.61398	2.7937e-07	0.552484	0.457068	0.238048	0.207207	1.32706	1.17429	0.693624	0.62162
ENSMUSG00000081766	2210409E12Rik	-1.37098	2.79898e-07	327.986	316.355	201.901	133.51	901.583	874.454	545.434	405.432
ENSMUSG00000030727	Rabep2	-3.02061	2.82118e-07	0.241828	0.173615	0.0429413	0.0231773	0.933171	0.770065	0.289456	0.268195
ENSMUSG00000045854	Lyrm2	-5.74913	2.92079e-07	2.31896	1.71183	0.049859	0.0519001	12.8881	10.9294	0.673097	0.726601
ENSMUSG00000029034	Ints11	-1.87648	2.92521e-07	0.509609	0.489852	0.201581	0.163011	8.02858	7.55604	2.70052	2.02203
ENSMUSG00000032078	Zpr1	-4.0271	2.92521e-07	1.96518	2.18575	0.248283	0.0849688	14.462	13.6475	1.45229	0.814284
ENSMUSG00000020392	Cdkn2aipnl	-1.41219	2.94619e-07	2.19914	2.23567	1.17209	1.07984	13.0562	12.4533	6.44652	5.37815
ENSMUSG00000015126	Tsr3	-1.75651	2.99169e-07	4.83316	3.99331	1.80947	1.72873	21.4167	20.2721	7.20071	6.01186
ENSMUSG00000079009	Gm14139	-2.60688	3.0181e-07	0.536081	0.552529	0.163975	0.0647434	1.0671	1.06026	0.333603	0.229545
ENSMUSG00000020088	Sar1a	-1.54172	3.06731e-07	1.43933	1.30192	0.689306	0.579238	9.35341	7.9351	3.79494	3.2406
ENSMUSG00000031774	Psme3ip1	-1.56621	3.13002e-07	0.820107	0.761892	0.421028	0.29461	3.4729	3.34409	2.71563	1.93323
ENSMUSG00000082016	Pgam1-ps2	-2.06993	3.1804e-07	16.9906	15.9732	7.02768	3.28083	281.526	263.67	147.113	75.6365
ENSMUSG00000015671	Psma2	-1.23363	3.21101e-07	0.937402	0.838937	0.54165	0.48153	7.50304	6.70773	4.47155	4.51059
ENSMUSG00000079043	Fastkd5	-2.53853	3.25262e-07	0.352857	0.350845	0.102652	0.0544746	0.885742	0.942673	0.334121	0.314276
ENSMUSG00000038880	Mrps34	-1.56496	3.33343e-07	8.37543	7.76288	4.19059	3.12596	51.6933	51.0476	34.5349	31.9133
ENSMUSG00000013701	Timm23	-1.9146	3.33919e-07	0.423665	0.393242	0.154393	0.137308	1.877	1.7234	0.463178	0.455614
ENSMUSG00000070934	Rraga	-1.33719	3.33919e-07	19.3086	16.4518	9.30364	9.97797	70.3541	62.8996	32.2808	33.8748
ENSMUSG00000083261	Gm7816	-1.68316	3.42367e-07	13.8637	12.7325	6.52203	4.54495	53.8927	51.1223	22.4314	13.4076
ENSMUSG00000083774	Gm7180	-1.50761	3.42629e-07	70.7842	55.4673	34.6789	25.1235	213.489	180.828	89.6823	70.8747
ENSMUSG00000021550	2210016F16Rik	-3.40908	3.4593e-07	0.775856	0.583336	0.120477	0.0376225	6.02366	5.49396	0.728883	0.514175
ENSMUSG00000025393	Atp5b	-1.24364	3.50854e-07	17.7585	18.6393	11.9045	8.8234	345.353	337.57	217.585	154.848
ENSMUSG00000058706	0610030E20Rik	-5.2739	3.60098e-07	0.339803	0.521352	0.0167607	0.0116312	1.51912	1.65259	0.212303	0.209362
ENSMUSG00000018362	Kpna2	-1.46035	3.71196e-07	2.05094	1.92402	1.06888	0.876433	4.17131	3.70085	1.86307	1.64098
ENSMUSG00000004667	Polr2e	-1.30349	3.73238e-07	9.54518	8.48522	5.20039	4.69033	119.709	111.933	72.0432	55.5963
ENSMUSG00000035372	1810055G02Rik	-1.87206	3.7526e-07	1.07588	0.975185	0.417947	0.332482	2.84471	2.79992	1.01599	0.827668
ENSMUSG00000046862	Pramel12	-2.3501	3.76629e-07	0.699488	0.973131	0.278229	0.148723	1.29136	1.52259	0.586537	0.657513
ENSMUSG00000117853	Vmn1r88	-1.58137	3.83485e-07	0.742513	0.713369	0.380384	0.270849	4.41297	3.96607	1.89696	1.43421
ENSMUSG00000103922	Gm6123	-1.52334	3.87392e-07	16.5208	16.7973	8.5953	6.98005	147.433	132.876	72.8162	50.7006
ENSMUSG00000010376	Nedd8	-1.32244	3.93192e-07	2.80733	2.79803	1.58586	1.44444	31.8736	31.8894	16.7474	15.0428
ENSMUSG00000025135	Anapc11	-1.71573	3.97362e-07	1.19219	1.19102	0.423198	0.5758	16.8099	16.4983	7.16104	6.97898
ENSMUSG00000001305	Rrp15	-1.42619	3.98357e-07	1.09257	0.980363	0.588951	0.449339	5.85716	5.24949	2.55212	2.03159
ENSMUSG00000034343	Ube2f	-1.77052	4.02969e-07	0.298463	0.293763	0.133476	0.0982749	1.13416	1.19655	0.489142	0.430376
ENSMUSG00000022538	Lsg1	-1.54385	4.13832e-07	1.18297	0.990753	0.59998	0.400507	5.56643	5.16546	2.47326	1.54195
ENSMUSG00000038722	Bud31	-1.22925	4.13832e-07	5.19643	4.85442	2.94289	2.87437	27.3266	26.4428	13.2029	14.0818
ENSMUSG00000032673	Prorsd1	-1.56106	4.27448e-07	4.76677	4.3941	2.18744	2.00789	11.5078	11.4317	5.44871	5.65106
ENSMUSG00000026499	Acbd3	-2.32337	4.4178e-07	0.19041	0.207783	0.0543781	0.0529911	0.428423	0.437973	0.232553	0.320355
ENSMUSG00000035575	Utp6	-1.95627	4.43759e-07	0.267492	0.270912	0.0986047	0.0879782	1.81623	2.0948	1.11933	1.1392
ENSMUSG00000022833	Ccdc14	-2.30093	4.43759e-07	0.166835	0.16255	0.0423925	0.049031	0.343782	0.348321	0.160149	0.168667
ENSMUSG00000020409	Slu7	-1.69987	4.52916e-07	0.929271	1.12416	0.494304	0.34779	3.81943	3.88822	1.97264	1.36734
ENSMUSG00000078789	Dph1	-1.85508	4.66196e-07	0.981509	0.881682	0.424088	0.259382	4.0289	3.63219	1.82573	1.63111
ENSMUSG00000020831	0610010K14Rik	-2.01966	4.71938e-07	3.03372	2.79536	1.07046	0.851361	29.8208	30.2831	8.02244	7.46193
ENSMUSG00000027341	Tmem230	-2.65024	4.71938e-07	0.679865	0.469102	0.113625	0.138669	3.14	2.92499	0.305611	0.261023
ENSMUSG00000037916	Ndufv1	-1.79806	4.84692e-07	2.41829	2.39079	1.12355	0.712983	46.7429	46.1867	20.35	14.9601
ENSMUSG00000116912	Gm5487	-1.66401	4.9057e-07	10.7547	11.2503	5.8761	3.36494	72.7969	75.9327	30.2868	17.6738
ENSMUSG00000036376	Abt1	-1.41389	5.01929e-07	5.20828	5.45969	3.09496	2.27918	12.2797	12.5969	7.41488	5.39612
ENSMUSG00000048327	Ckap2l	-2.03077	5.07018e-07	0.41198	0.316483	0.149416	0.0865371	1.21785	1.15121	0.53363	0.472446
ENSMUSG00000042229	Rabif	-1.38662	5.13342e-07	2.00517	2.04264	1.17397	0.907519	4.76125	4.934	2.62241	2.01191
ENSMUSG00000047539	Fbxo28	-1.97744	5.15011e-07	0.279908	0.372026	0.129061	0.0903558	0.584333	0.709866	0.264976	0.263934
ENSMUSG00000029777	Gars	-1.36514	5.1683e-07	1.62101	1.69641	1.03888	0.691511	16.89	16.837	9.75194	7.16196
ENSMUSG00000005625	Psmd4	-1.4168	5.22517e-07	4.17715	4.65493	2.65695	1.77771	43.816	43.5771	24.3822	18.0096
ENSMUSG00000021537	Cetn3	-1.63736	5.27963e-07	0.890086	0.851623	0.386486	0.37099	8.79323	8.40621	4.04538	4.29289
ENSMUSG00000066979	Bub3	-1.3124	5.30761e-07	4.99282	5.1206	3.1846	2.2952	21.534	20.5365	12.1272	9.40162
ENSMUSG00000020720	Psmd12	-1.24915	5.50755e-07	2.96597	2.70482	1.80732	1.41507	16.7298	14.9929	8.41977	6.78089
ENSMUSG00000055421	Pcdh9	-1.70573	5.6127e-07	0.0164772	0.0198145	0.00898818	0.00579925	0.321239	0.315658	0.192763	0.134388
ENSMUSG00000101878	Gm8203	-1.16792	5.70329e-07	871.883	767.136	548.942	439.077	7307.16	6404.36	4611.61	3682.11
ENSMUSG00000020265	Sumo3	-1.37548	5.74679e-07	2.97267	2.9071	1.7603	1.28626	26.4825	24.354	14.5138	10.035
ENSMUSG00000026049	Tex30	-1.20723	5.79561e-07	2.4671	2.37389	1.43473	1.40989	5.00048	4.91087	2.73771	3.01263
ENSMUSG00000062518	Zfp534	-1.43641	5.94302e-07	0.619938	0.62005	0.318516	0.301202	1.12752	1.01499	0.607873	0.637427
ENSMUSG00000092223	Gm19807	-1.61396	5.99866e-07	23.2446	18.5781	9.13493	9.45803	91.5801	82.5692	41.6201	39.9678
ENSMUSG00000075053	Vdac3-ps1	-1.4192	6.06331e-07	34.4387	31.5425	18.9462	14.2347	337.281	294.442	161.234	111.333
ENSMUSG00000056201	Cfl1	-1.04931	6.18394e-07	22.2855	24.4967	15.2516	15.4186	285.058	286.069	216.494	194.369
ENSMUSG00000051232	Tmem199	-1.59283	6.21499e-07	6.94697	4.81993	3.10677	2.14713	12.3451	10.0098	6.22627	4.79791
ENSMUSG00000004446	Bid	-1.36336	6.27848e-07	1.85681	1.78154	1.11512	0.786546	6.34918	5.99371	3.46301	2.75155
ENSMUSG00000102869	Norad	-1.51628	6.35296e-07	3.00748	3.05299	1.47684	1.38632	8.36198	9.0429	4.21956	3.21186
ENSMUSG00000019917	Septin10	-2.57354	6.42688e-07	0.0581256	0.055065	0.0129972	0.0126837	0.260112	0.256732	0.0865129	0.117536
ENSMUSG00000023286	Ube2j2	-1.57094	6.45094e-07	0.908989	1.01469	0.481286	0.38703	3.42534	3.64417	1.50583	1.3503
ENSMUSG00000082588	Gm15443	-3.21538	6.47739e-07	3.98052	3.9878	0.635764	0.496342	8.31644	6.15661	1.07285	1.24086
ENSMUSG00000005732	Ranbp1	-1.13344	6.59299e-07	9.82834	8.9556	6.07675	5.5334	103.833	91.8446	60.1631	56.7363
ENSMUSG00000062309	Rpp25	-1.39425	6.59299e-07	21.0125	20.7623	12.2501	9.10484	70.3694	69.342	35.8343	27.7435
ENSMUSG00000002963	Pnkp	-3.17498	6.60958e-07	0.627268	0.568392	0.111318	0.0579377	7.09908	6.41891	1.33582	1.14717
ENSMUSG00000024181	Mrpl28	-1.58788	6.66055e-07	5.85857	6.8901	3.39013	2.26547	80.2979	78.9967	41.0059	28.8194
ENSMUSG00000091803	Cox16	-2.02658	6.68819e-07	0.0956784	0.0800688	0.0374658	0.0193653	0.468223	0.459941	0.186554	0.220549
ENSMUSG00000062797	Hikeshi	-1.65187	6.75938e-07	0.546525	0.479766	0.227073	0.21488	5.34708	4.82674	1.6308	1.69899
ENSMUSG00000031754	Nudt21	-1.49654	6.84075e-07	0.67932	0.729892	0.341927	0.333876	5.13144	5.12256	2.42828	2.82534
ENSMUSG00000031297	Slc7a3	-1.50152	6.85125e-07	3.15777	2.40053	1.30121	1.3744	28.9505	17.1153	13.5527	9.69049
ENSMUSG00000051671	Coa6	-1.68526	6.85855e-07	4.59261	3.69485	1.77481	1.71966	15.9543	15.2904	7.06576	7.08777
ENSMUSG00000053038	Gm6180	-1.31492	6.86364e-07	67.0642	74.5329	42.7896	33.7805	807.345	820.207	606.447	428.386
ENSMUSG00000027540	Ptpn1	-2.62271	6.90746e-07	0.119457	0.0957575	0.0296027	0.0157656	0.735212	0.735757	0.207219	0.196353
ENSMUSG00000037149	Ddx1	-1.62588	7.06903e-07	0.555003	0.55694	0.291054	0.189355	8.41363	8.23489	3.59068	2.86347
ENSMUSG00000092558	Med20	-1.96011	7.47719e-07	0.985285	0.898267	0.421341	0.216653	2.68797	2.54285	1.19295	0.866611
ENSMUSG00000068922	Msto1	-1.96101	7.58997e-07	1.24529	1.316	0.567901	0.297482	15.3892	15.6823	6.37149	3.69945
ENSMUSG00000032348	Gsta4	-1.18537	7.58997e-07	1.75674	1.796	1.11936	0.992896	26.145	25.049	17.4071	17.2519
ENSMUSG00000041079	Rwdd2b	-3.56949	8.02295e-07	0.447292	0.376213	0.0591011	0.0283941	1.68344	1.92909	0.4228	0.369123
ENSMUSG00000024259	Slc25a46	-2.28693	8.08863e-07	0.10617	0.175941	0.0478439	0.0277381	0.411679	0.503297	0.158672	0.195427
ENSMUSG00000034403	Pja1	-2.13191	8.29975e-07	1.33616	1.08731	0.399934	0.34284	7.13322	6.56527	2.76425	2.54681
ENSMUSG00000032288	Imp3	-1.46035	8.50376e-07	19.7441	20.9854	11.002	8.88295	58.0339	59.6656	30.2908	25.0338
ENSMUSG00000029003	Mad2l2	-3.46586	8.73642e-07	0.251168	0.19852	0.0404201	0.00885785	2.95313	2.93285	0.457386	0.416319
ENSMUSG00000022559	Fbxl6	-3.17517	8.98674e-07	1.04014	1.19439	0.204585	0.112084	9.32271	7.71611	1.95971	1.54676
ENSMUSG00000036676	Tmtc3	1.73782	9.11871e-07	0.088538	0.0858235	0.444697	0.338785	0.338054	0.295761	1.18561	1.11627
ENSMUSG00000033983	Coil	-1.25539	9.19958e-07	10.7803	10.5542	7.15811	4.89333	33.9289	33.443	21.0686	16.1851
ENSMUSG00000022346	Myc	-1.49257	9.55263e-07	2.8418	2.94669	1.35326	1.44269	5.32107	6.30776	2.86342	2.93981
ENSMUSG00000041431	Ccnb1	-1.03688	9.88976e-07	15.6588	14.9994	10.1438	10.1566	40.5818	39.0954	23.2247	23.242
ENSMUSG00000074170	Plekhf1	-2.17828	1.03432e-06	0.559378	0.576541	0.191751	0.141256	1.10293	1.15308	0.489702	0.491324
ENSMUSG00000053801	Grwd1	-1.36592	1.04762e-06	8.05739	8.44184	5.14197	3.44976	26.7799	28.3734	15.8758	10.5152
ENSMUSG00000083215	Rbmx2-ps	-3.03854	1.08825e-06	4.82584	3.70119	0.945955	0.364696	9.27565	8.01924	1.7868	0.948209
ENSMUSG00000049960	Mrps16	-1.52154	1.11191e-06	3.12223	3.09956	1.41436	1.53491	27.656	26.7967	12.9323	14.5503
ENSMUSG00000073197	5730507C01Rik	-1.76343	1.13848e-06	0.424257	0.492243	0.190047	0.173303	0.761415	0.738364	0.413078	0.389114
ENSMUSG00000070708	Gtsf1l	-1.49356	1.13848e-06	23.7541	21.9145	12.3672	9.40756	68.426	67.3486	33.0585	29.8731
ENSMUSG00000021147	Wdr37	-2.09358	1.18012e-06	0.0870801	0.0998551	0.0311925	0.0275498	0.221505	0.242981	0.110591	0.14562
ENSMUSG00000025722	Wdr73	-1.7334	1.18898e-06	2.0779	2.10501	1.10906	0.559544	6.80291	7.23972	3.37043	2.09668
ENSMUSG00000116802	Gm5165	-1.61945	1.19924e-06	0.375658	0.371564	0.172757	0.155063	0.629181	0.599238	0.33517	0.36612
ENSMUSG00000081470	Gm14131	-2.68653	1.23274e-06	6.40418	5.10651	1.26887	1.13213	60.7992	54.496	5.84589	4.90589
ENSMUSG00000038346	Zfp384	-2.29974	1.23274e-06	0.227252	0.195715	0.0703244	0.0425051	0.466679	0.493281	0.279029	0.28809
ENSMUSG00000026245	Farsb	-1.24674	1.25978e-06	0.424883	0.437606	0.259568	0.231458	4.42059	4.28061	2.17578	1.74072
ENSMUSG00000079941	Cox5b-ps	-1.78224	1.26309e-06	18.0605	19.623	7.99821	6.6878	265.63	244.018	147.508	146.176
ENSMUSG00000116347	Gm49416	-1.30186	1.27462e-06	4.42094	3.77783	2.15599	2.3788	36.7641	35.9395	19.9571	21.8505
ENSMUSG00000083860	Gm13313	-4.60334	1.27462e-06	1.77439	2.48738	0.15029	0.062577	16.8836	17.4646	1.38267	1.00123
ENSMUSG00000074968	Ano3	1.97994	1.27462e-06	0.0195126	0.00950569	0.094645	0.060098	0.0396165	0.0331729	0.213199	0.199562
ENSMUSG00000072761	Gm6712	-2.14272	1.28447e-06	0.351343	0.278005	0.120668	0.0668125	0.597053	0.623815	0.277279	0.253888
ENSMUSG00000030538	Cib1	-1.52165	1.28447e-06	2.23189	2.44982	1.08667	1.12517	16.9397	16.9058	8.35414	8.0318
ENSMUSG00000022300	Dcaf13	-1.36714	1.32986e-06	0.728749	0.605885	0.360413	0.341243	4.27132	3.81927	1.69758	1.68027
ENSMUSG00000046204	Pnma2	-2.46483	1.36645e-06	0.449538	0.553075	0.142182	0.0963739	0.845842	1.29827	0.390175	0.351076
ENSMUSG00000021660	Btf3	-1.46268	1.36852e-06	2.76226	2.35573	1.3517	1.15425	23.3522	22.8554	12.7014	13.3835
ENSMUSG00000018677	Slc25a39	-1.33415	1.36886e-06	4.18176	4.3587	2.37707	2.20096	65.5808	68.9531	40.2919	29.9386
ENSMUSG00000112241	Gm49325	-1.28708	1.37723e-06	1.05864	1.04035	0.653557	0.504716	9.28536	8.56623	5.17868	3.70957
ENSMUSG00000118537	Shld3	-1.65879	1.45206e-06	2.50786	2.34678	0.883978	1.23647	6.44879	5.44745	1.97514	2.12788
ENSMUSG00000063888	Rpl7l1	-1.31128	1.50236e-06	6.07729	6.77348	4.12211	2.8322	37.7271	38.2063	19.9043	14.8419
ENSMUSG00000072704	Smim10l1	-1.96207	1.54302e-06	1.27449	1.18739	0.364389	0.509515	5.18553	5.13261	1.53913	1.74367
ENSMUSG00000037313	Tacc3	-1.33159	1.56605e-06	0.974788	1.04741	0.56522	0.520095	9.95178	9.32773	3.99089	2.9808
ENSMUSG00000096740	Lbhd1	-1.30158	1.58254e-06	3.17115	2.66335	1.50901	1.72329	31.1283	29.9675	20.0164	22.5705
ENSMUSG00000043251	Exoc3l	-4.56967	1.58903e-06	0.330207	0.399295	0.0263701	0.0109798	2.17936	2.61863	0.501032	0.417234
ENSMUSG00000020541	Tom1l1	-2.46719	1.62373e-06	0.106442	0.098378	0.0268488	0.0226605	1.06572	1.17287	0.592851	0.707007
ENSMUSG00000085172	Gm6542	-1.39299	1.64404e-06	25.7456	27.1237	14.9409	12.1257	315.515	306.535	190.728	170.902
ENSMUSG00000028212	Ccne2	-1.42662	1.64965e-06	1.21095	1.14916	0.582314	0.611203	2.46096	2.25561	1.48975	1.57094
ENSMUSG00000111059	Gm33838	4.34632	1.65382e-06	1.63614	0.517272	34.5452	25.3192	11.2844	6.32438	198.812	162.625
ENSMUSG00000029326	Enoph1	-1.32746	1.70272e-06	0.755517	0.737639	0.420081	0.384239	3.52237	3.45096	1.79469	1.41909
ENSMUSG00000039841	Zfp800	-2.06801	1.767e-06	0.0409274	0.0460895	0.0109242	0.0180227	0.162972	0.162584	0.130473	0.191383
ENSMUSG00000027671	Actl6a	-1.265	1.76898e-06	1.41797	1.26523	0.778484	0.734895	13.9147	12.6745	7.07727	5.38376
ENSMUSG00000030868	Dctn5	-1.51595	1.81627e-06	1.07074	1.06105	0.578202	0.419614	7.22204	7.08681	3.0437	2.46682
ENSMUSG00000072980	Oip5	-1.64853	1.88182e-06	1.53556	1.15275	0.563781	0.605791	14.4186	16.4138	15.6331	21.4601
ENSMUSG00000032399	Rpl4	-1.11452	1.91844e-06	28.2289	25.844	18.6003	15.2023	382.594	353.457	287.649	249.312
ENSMUSG00000032534	Cep63	-1.85087	1.91844e-06	0.182027	0.192837	0.072239	0.0679191	0.703097	0.704335	0.309928	0.316956
ENSMUSG00000069844	Sco1	-2.88841	1.96192e-06	0.259032	0.231051	0.0497759	0.0376826	0.821616	1.03575	0.307706	0.235516
ENSMUSG00000038462	Uqcrfs1	-1.14775	1.96202e-06	8.90147	8.17117	5.30479	5.15293	51.6216	46.4168	31.7449	27.442
ENSMUSG00000042694	Stn1	-2.11479	1.96202e-06	0.169385	0.177728	0.0616373	0.0446334	1.08822	1.07581	0.292107	0.2678
ENSMUSG00000022043	Trim35	-2.00379	1.9634e-06	0.421131	0.741318	0.196937	0.193217	1.75336	2.35946	0.792275	0.862409
ENSMUSG00000023330	Dtwd1	-1.85011	2.06007e-06	0.687599	0.593813	0.260385	0.216836	1.55264	1.4889	0.71172	0.547252
ENSMUSG00000028873	Cdca8	-1.38148	2.06304e-06	1.65797	1.44198	0.936209	0.663789	11.3765	11.3708	5.92516	4.27233
ENSMUSG00000071252	2210408I21Rik	3.19206	2.06334e-06	0.0375375	0.0166739	0.366063	0.310768	0.0782438	0.0482224	0.796168	0.700114
ENSMUSG00000021385	Ippk	-2.17023	2.07016e-06	0.122425	0.136387	0.039859	0.0375765	0.586561	0.697822	0.418144	0.39925
ENSMUSG00000025645	Ccdc51	-2.77813	2.17088e-06	0.384804	0.344314	0.0651853	0.0814245	0.921198	0.79766	0.202074	0.251059
ENSMUSG00000052293	Taf9	-1.29945	2.18712e-06	6.37221	6.41267	3.90384	3.08747	23.6812	24.0123	11.9005	11.8958
ENSMUSG00000024580	Grpel2	-1.56803	2.20922e-06	1.41711	1.3329	0.759377	0.478181	2.47785	2.4017	1.50938	1.04907
ENSMUSG00000050565	Tor1aip2	-1.14061	2.21236e-06	1.30651	1.24993	0.80924	0.762287	3.19312	3.36745	2.04306	1.94627
ENSMUSG00000097333	Zfp87	-2.18769	2.23168e-06	0.672727	0.645581	0.247576	0.130487	1.0147	1.16425	0.488884	0.358838
ENSMUSG00000025470	Zfp511	-2.84736	2.23168e-06	1.14856	1.1441	0.317165	0.080524	6.89139	6.72839	1.21451	0.982393
ENSMUSG00000071645	Tut1	-2.19976	2.23519e-06	0.447848	0.631034	0.192377	0.115214	1.3624	1.67966	0.600849	0.636418
ENSMUSG00000042462	Dctpp1	-1.2394	2.23745e-06	7.70726	7.05061	4.31717	4.15934	86.7844	84.6379	59.0939	60.8891
ENSMUSG00000038520	Tbc1d17	-3.55822	2.24746e-06	0.153204	0.230156	0.0270453	0.0140762	1.59252	1.63093	0.292991	0.319062
ENSMUSG00000026039	Sgo2a	-1.37617	2.29803e-06	0.551137	0.649801	0.321158	0.303708	1.4275	1.57754	0.882914	0.791001
ENSMUSG00000074238	Ap1ar	-2.23274	2.33374e-06	0.175716	0.195508	0.0619264	0.0422334	0.706684	0.719995	0.238096	0.222281
ENSMUSG00000035790	Cep19	-1.9054	2.38304e-06	0.796413	0.957296	0.307311	0.328094	3.30547	3.41991	1.13075	1.07451
ENSMUSG00000117450	4933424G05Rik	-3.04548	2.41198e-06	0.0582931	0.0495955	0.0093894	0.00804899	0.349759	0.364673	0.0673828	0.0896887
ENSMUSG00000023572	Ccndbp1	-2.37797	2.48513e-06	0.658136	0.614035	0.206948	0.111699	4.14763	3.80567	1.15738	0.861681
ENSMUSG00000044715	Gskip	-2.30326	2.52924e-06	0.249867	0.290074	0.0734212	0.0745627	1.17245	1.06886	0.44769	0.548036
ENSMUSG00000025651	Uqcrc1	-1.39109	2.53655e-06	3.71944	3.55489	2.29492	1.42549	66.416	61.7623	34.7624	21.9828
ENSMUSG00000083890	Gm15703	-2.07081	2.61328e-06	9.00786	8.93122	3.66557	1.92709	91.867	92.4414	38.0627	25.4375
ENSMUSG00000030888	Rrp8	-1.44996	2.62953e-06	3.40071	4.07746	2.13724	1.52313	9.34681	10.1936	5.28838	4.01772
ENSMUSG00000113996	Gm48455	-2.14823	2.66448e-06	19.4287	16.5276	7.05962	3.55318	122.262	114.19	49.8053	27.1334
ENSMUSG00000021597	Slf1	-2.01901	2.67206e-06	0.0693988	0.069548	0.0246877	0.0212929	0.157725	0.158967	0.0761793	0.103528
ENSMUSG00000054766	Set	-1.12961	2.67629e-06	5.19207	5.18203	3.54768	2.85614	63.9652	63.8148	47.824	37.3039
ENSMUSG00000025785	Exosc7	-1.44242	2.67629e-06	1.04032	0.833676	0.52326	0.40555	7.18053	6.29388	3.06704	2.31193
ENSMUSG00000083139	Gm12418	-1.38221	2.68305e-06	19.0575	18.5138	10.3075	9.14527	48.0149	49.4513	26.5644	20.5949
ENSMUSG00000024592	C330018D20Rik	-4.71884	2.78433e-06	0.140226	0.0822234	0.00500351	0.00694445	0.346089	0.234924	0.0233497	0.121528
ENSMUSG00000053907	Mat2a	-1.17557	2.81377e-06	12.8557	15.4284	9.59653	7.265	33.9629	39.2074	20.6631	16.2158
ENSMUSG00000022223	Sdr39u1	-1.81803	2.82381e-06	3.09724	2.83889	1.29855	0.946199	13.2407	12.594	4.98861	4.68594
ENSMUSG00000078784	Rbis	-1.75471	2.82595e-06	1.58475	1.86946	0.703509	0.678063	11.7574	13.6826	4.59235	6.73995
ENSMUSG00000005161	Prdx2	-1.12888	2.87729e-06	8.5519	8.38445	5.48222	5.0022	133.043	122.607	113.109	104.943
ENSMUSG00000011837	Snapc2	-1.52958	2.93891e-06	4.75048	4.62089	2.48962	1.85727	13.4721	13.7531	7.62446	6.09011
ENSMUSG00000037085	Trmt12	-1.94953	2.94329e-06	1.67504	1.41682	0.52671	0.563502	2.98367	2.67908	1.19241	1.05085
ENSMUSG00000022193	Psmb5	-1.40058	2.96063e-06	6.06152	5.39298	3.33006	2.50205	63.7356	60.3221	38.35	29.6945
ENSMUSG00000022889	Mrpl39	-1.4528	2.97668e-06	0.952881	0.795775	0.450174	0.414461	8.09789	7.82196	3.50454	3.46504
ENSMUSG00000081111	Gm5913	-1.82116	2.98464e-06	12.0822	14.8444	6.94046	3.10317	114.989	121.175	58.598	22.595
ENSMUSG00000067942	Zfp160	-2.3247	3.01259e-06	0.144999	0.149432	0.0457732	0.0317647	0.283174	0.280395	0.127783	0.140956
ENSMUSG00000028423	Nfx1	-1.21568	3.02828e-06	0.456022	0.493622	0.280357	0.273363	2.0886	2.25879	1.14568	1.0011
ENSMUSG00000082272	Gm11675	-1.37812	3.09438e-06	30.1239	27.581	17.1138	12.7188	316.02	291.186	201.959	133.466
ENSMUSG00000038542	Pcid2	-1.31021	3.09438e-06	0.672113	0.724436	0.391857	0.369508	4.17081	4.52925	2.15291	1.92672
ENSMUSG00000039238	Zfp750	2.38199	3.12726e-06	0.132532	0.109849	0.912446	0.795557	0.251113	0.295218	1.7976	1.76159
ENSMUSG00000020176	Grb10	-1.98867	3.14312e-06	0.0598078	0.0673512	0.0243974	0.0181849	0.359385	0.422669	0.290058	0.304754
ENSMUSG00000023004	Tuba1b	-1.1704	3.22228e-06	18.5751	20.7666	13.2468	10.3014	166.378	173.749	122.375	90.1638
ENSMUSG00000091449	Gm10269	-1.31034	3.31919e-06	54.3479	51.6316	29.3246	28.6	796	822.074	810.521	734.618
ENSMUSG00000111897	Gm19810	-1.24668	3.32392e-06	86.1521	100.795	50.8864	56.2126	1132.28	1285.19	955.289	1155.33
ENSMUSG00000031422	Morf4l2	-1.08404	3.32392e-06	5.97014	5.95086	4.03762	3.57184	39.3617	41.149	25.9172	23.5009
ENSMUSG00000051223	Bzw1	-1.08803	3.368e-06	3.62877	3.61132	2.39368	2.21951	33.0178	31.7955	18.7415	15.072
ENSMUSG00000083465	Gm11652	-1.68733	3.42793e-06	9.7987	8.96523	4.6547	3.10524	103.645	95.6744	45.9555	23.3428
ENSMUSG00000081865	Gm15484	-1.92223	3.49712e-06	11.4742	11.64	5.23372	2.78543	88.5556	84.8748	48.7956	43.4199
ENSMUSG00000050213	Snip1	-1.74979	3.53004e-06	1.15449	1.57995	0.614438	0.46934	1.92943	2.57617	1.17141	1.06752
ENSMUSG00000035293	G2e3	-1.71833	3.57671e-06	0.290161	0.321292	0.130665	0.119598	0.662938	0.672333	0.32103	0.323619
ENSMUSG00000024829	Mrpl21	-1.9518	3.59151e-06	0.797718	0.6466	0.275431	0.22527	8.21766	7.52827	2.43954	2.23904
ENSMUSG00000057788	Ddx49	-1.67974	3.59805e-06	1.12648	1.19219	0.568779	0.394708	13.7842	13.4956	5.62346	4.04576
ENSMUSG00000037262	Kin	-1.88022	3.63634e-06	0.668091	0.554239	0.232087	0.216596	1.32187	1.26817	0.474845	0.472068
ENSMUSG00000039183	Nubp2	-1.39954	3.75088e-06	6.96815	6.1373	3.89531	2.77575	47.6703	44.4341	22.6398	14.8947
ENSMUSG00000027342	Pcna	-1.09732	3.75088e-06	10.7927	10.3465	6.73155	6.68044	48.911	46.1931	23.9448	24.5167
ENSMUSG00000116925	Gm49776	-1.15229	3.75117e-06	3.70431	3.3002	2.26467	2.00286	44.8164	39.1341	25.1599	22.2644
ENSMUSG00000002395	Use1	-1.49125	3.93169e-06	6.04075	6.10471	3.42205	2.35125	60.9126	63.5328	32.8313	30.6367
ENSMUSG00000038803	Ost4	-1.40266	4.08029e-06	7.40822	8.07497	3.67926	4.31084	86.2048	91.0241	48.8743	60.8149
ENSMUSG00000025869	Nop16	-1.35482	4.12812e-06	5.81283	5.63388	3.60254	2.40047	37.7982	36.2317	19.7671	13.6448
ENSMUSG00000051730	Mettl5	-1.80292	4.13308e-06	0.570006	0.521242	0.18983	0.239943	9.50819	9.56936	5.61805	6.45024
ENSMUSG00000020022	Ndufa12	-1.64885	4.14202e-06	0.556597	0.411505	0.200739	0.220897	5.55058	5.16528	2.63255	3.14928
ENSMUSG00000045948	Mrps12	-1.38946	4.25701e-06	8.02103	7.47368	4.27464	3.70283	56.6552	54.5789	28.6221	25.5464
ENSMUSG00000021711	Trappc13	-1.2072	4.30237e-06	0.746209	0.696552	0.424319	0.423947	3.70216	3.40537	1.69817	1.54638
ENSMUSG00000031575	Ash2l	-1.23473	4.36259e-06	1.20254	1.21075	0.785303	0.594899	17.9571	17.4916	8.1799	5.76067
ENSMUSG00000022544	Eef2kmt	-3.02247	4.38005e-06	0.305421	0.223035	0.0468145	0.0401313	2.89165	2.8946	1.22544	0.825559
ENSMUSG00000097098	9330111N05Rik	-1.44661	4.38112e-06	0.141522	0.193559	0.0987437	0.0653907	0.870902	0.940488	0.555949	0.352701
ENSMUSG00000030929	Eri2	-2.16032	4.39275e-06	0.215875	0.235079	0.0795957	0.0534542	0.479977	0.483721	0.1823	0.205799
ENSMUSG00000118653	Gm2296	-1.50519	4.44858e-06	14.7485	15.2131	8.14572	5.97319	81.2939	67.8782	37.8595	28.9047
ENSMUSG00000082675	Gm6382	-1.60495	4.46751e-06	28.7718	28.6233	16.6719	8.42517	228.937	219.06	117.707	68.4095
ENSMUSG00000110331	Nudc-ps1	-1.76131	4.50675e-06	16.9252	15.4093	7.21436	5.53994	157.193	148.991	73.9176	48.0128
ENSMUSG00000018286	Psmb6	-1.12352	4.56037e-06	20.8165	18.6701	12.9312	11.6231	279.385	263.959	164.536	149.059
ENSMUSG00000043889	Gm8399	-1.46421	4.62474e-06	19.8288	27.1691	13.7391	8.98778	126.226	135.897	76.6587	40.3235
ENSMUSG00000043284	Tmem11	-1.30054	4.68805e-06	3.81469	3.35207	2.34132	1.57443	8.39626	8.03181	5.22126	3.95897
ENSMUSG00000042165	Adrm1b	-1.45306	4.73135e-06	15.7858	15.1251	9.10542	5.9939	76.0819	81.8489	49.5765	33.7218
ENSMUSG00000035186	Ubd	-1.21325	4.77126e-06	14.4393	12.2598	7.21436	8.52534	50.4054	50.3926	26.7138	30.8082
ENSMUSG00000050052	Tdrp	-1.40977	4.81084e-06	0.835372	0.961746	0.527836	0.377098	2.34157	2.40437	1.63304	1.28154
ENSMUSG00000025016	Tm9sf3	-1.93437	4.87463e-06	0.13049	0.116563	0.0441353	0.0433897	0.694118	0.740391	0.256843	0.214396
ENSMUSG00000030060	Hmces	-1.25819	4.8937e-06	2.15475	1.98685	1.36247	0.968409	13.6142	13.1168	7.28898	5.00344
ENSMUSG00000001774	Chordc1	-1.2691	4.8937e-06	0.858707	0.836122	0.495474	0.455474	5.7462	5.25465	2.64853	2.42205
ENSMUSG00000026150	Mff	-1.402	4.95658e-06	0.586994	0.721668	0.368416	0.295947	4.32935	4.31541	1.97357	1.64744
ENSMUSG00000033294	Noc4l	-1.44164	4.98184e-06	3.67203	3.82074	2.17002	1.51947	42.7821	41.2479	20.3448	13.9873
ENSMUSG00000061024	Rrs1	-1.33617	4.98523e-06	7.94035	10.3364	4.69334	5.13388	18.1006	23.558	9.5935	10.3009
ENSMUSG00000025340	Rabgef1	-1.34272	5.11353e-06	0.446616	0.492172	0.275704	0.221621	3.66472	3.59623	1.98813	1.82877
ENSMUSG00000062931	Zfp938	-2.10431	5.1598e-06	0.290881	0.405011	0.101134	0.119723	0.862001	1.12775	0.36884	0.582102
ENSMUSG00000046671	Mtfr1l	-1.43548	5.17922e-06	1.38636	1.62693	0.808114	0.689504	9.66894	10.4789	5.80915	4.81963
ENSMUSG00000081643	Gm11605	-2.20322	5.281e-06	9.47376	7.37086	2.77408	2.10011	84.9932	87.2959	21.89	18.0609
ENSMUSG00000031701	Dnaja2	-1.04978	5.38266e-06	4.71897	5.01067	3.42348	2.9298	17.214	17.9924	9.78112	8.54429
ENSMUSG00000028821	Syf2	-1.51092	5.38951e-06	2.75175	2.42377	1.45009	0.979102	11.7957	11.0752	5.81995	4.31417
ENSMUSG00000022422	Dscc1	-3.23384	5.43994e-06	0.178183	0.199293	0.0294294	0.0235647	1.12579	1.10408	0.140356	0.24036
ENSMUSG00000028309	Rnf20	-1.87033	5.43994e-06	0.255333	0.31587	0.0942837	0.119953	1.01899	1.30037	0.589273	0.646111
ENSMUSG00000026604	Ptpn14	1.7614	5.68315e-06	0.0235614	0.0204849	0.119419	0.0813482	0.1182	0.133731	0.400185	0.358755
ENSMUSG00000021707	Dhfr	-1.32454	5.68315e-06	0.480511	0.628365	0.288546	0.312214	4.53684	4.6225	2.51149	2.74472
ENSMUSG00000082120	Gm15720	-1.81445	5.6865e-06	31.0033	26.4464	12.2475	9.62176	114.299	95.4106	43.6749	31.9924
ENSMUSG00000014226	Cacybp	-1.01136	5.78621e-06	7.77038	7.27136	5.10028	5.03474	56.6611	51.1888	31.0326	28.1494
ENSMUSG00000022635	Zcrb1	-2.00572	5.78621e-06	0.43817	0.539089	0.154421	0.177371	3.2196	3.06577	0.979776	0.909028
ENSMUSG00000042211	Fbxo38	-1.97739	5.80541e-06	0.154414	0.167439	0.0665688	0.0411195	0.565313	0.6221	0.279443	0.251286
ENSMUSG00000071653	1810009A15Rik	-1.28579	5.85774e-06	12.2088	9.95253	5.79715	6.61953	106.403	102.749	58.646	65.1254
ENSMUSG00000002679	Med6	-1.16128	5.91188e-06	1.5297	1.43608	0.932589	0.863254	3.8555	3.68514	2.22211	2.27988
ENSMUSG00000025980	Hspd1	-1.06933	6.02394e-06	6.24355	6.49246	4.42306	3.77975	49.03	50.6941	33.2653	27.7942
ENSMUSG00000039826	Trub2	-1.5014	6.07366e-06	0.514937	0.477387	0.263969	0.206392	2.1794	1.98946	1.10724	0.813136
ENSMUSG00000028636	Ppcs	-1.60928	6.19616e-06	5.13805	5.16036	2.93087	1.55157	11.5344	11.3233	6.27206	3.66102
ENSMUSG00000047832	Cdca4	-1.30605	6.23759e-06	4.0569	4.19267	2.68246	1.79266	7.26438	7.48067	4.79087	3.61483
ENSMUSG00000038618	Rassf7	-1.59685	6.2391e-06	4.22726	4.52962	2.28162	1.57527	11.1408	12.7075	6.44906	5.23473
ENSMUSG00000033900	Map9	-4.17713	6.3155e-06	0.0673286	0.0462338	0.00350118	0.00546676	0.125262	0.152571	0.0227577	0.0400896
ENSMUSG00000044551	9930012K11Rik	-3.2344	6.31727e-06	0.537358	0.562656	0.0511305	0.119753	1.16618	1.11406	0.147	0.212894
ENSMUSG00000030357	Fkbp4	-1.3184	6.31727e-06	8.27073	8.14692	5.50881	3.32985	124.38	127.272	79.7685	48.9997
ENSMUSG00000074513	Arfip1	-1.95475	6.36783e-06	0.0653364	0.0868485	0.0282403	0.024301	0.262019	0.29966	0.119362	0.165403
ENSMUSG00000086922	Gm13835	-1.13801	6.36783e-06	84.6639	80.9858	56.6514	44.9582	886.716	849.722	577.121	536.924
ENSMUSG00000075054	Yae1d1	-1.72782	6.3939e-06	0.877687	0.644321	0.295469	0.332959	1.8669	1.57978	0.856588	1.13432
ENSMUSG00000005410	Mcm5	-1.19415	6.39711e-06	3.86701	4.40196	2.85409	2.00578	30.4944	32.5587	18.2019	12.5846
ENSMUSG00000085627	Gm11222	-1.47681	6.43938e-06	23.4566	20.833	12.4062	8.91578	112.781	106.73	52.4946	34.0086
ENSMUSG00000029267	Mtf2	-0.973273	6.54194e-06	3.29693	3.5535	2.47092	2.25428	9.50878	9.86084	6.84653	6.10377
ENSMUSG00000030493	Faap24	-1.87024	6.90307e-06	1.60489	1.6286	0.695472	0.477802	4.00601	4.00416	2.12119	1.82434
ENSMUSG00000031730	Dhodh	-1.55519	6.91776e-06	0.864321	0.748097	0.432408	0.301378	7.51657	6.71632	3.46866	2.77502
ENSMUSG00000082458	Gm9430	-2.00356	6.91776e-06	4.42776	4.54589	1.83505	1.11057	9.61894	11.2332	3.56342	1.68806
ENSMUSG00000040177	2310057M21Rik	-1.57492	6.91967e-06	0.410901	0.397418	0.180573	0.187965	0.71017	0.701325	0.390357	0.39528
ENSMUSG00000003824	Syce2	-1.18492	6.95636e-06	1.52671	1.55252	0.926259	0.909442	15.7736	15.1833	11.2607	11.5912
ENSMUSG00000066652	Lefty2	-1.59275	7.07075e-06	2.22607	1.74134	0.978139	0.791918	10.4013	7.14713	3.67889	2.47757
ENSMUSG00000031226	Pbdc1	-1.29268	7.07075e-06	0.613539	0.554707	0.349087	0.294335	4.73346	4.07349	2.12768	2.29291
ENSMUSG00000000355	Mcts1	-1.78644	7.15787e-06	0.635074	0.571496	0.253583	0.21645	8.4238	8.00988	3.09371	3.1834
ENSMUSG00000039725	Trp53rka	-3.03367	7.17445e-06	1.05151	1.19555	0.273635	0.0632971	2.24805	2.58738	0.597944	0.253189
ENSMUSG00000002524	Puf60	-1.31899	7.28134e-06	3.19562	3.34289	2.11699	1.39544	19.8953	20.2389	11.5737	7.98115
ENSMUSG00000003382	Etv3	-4.8579	7.30399e-06	0.0829837	0.217805	0.011045	0	0.201532	0.353934	0.0485982	0.0689831
ENSMUSG00000047613	A430005L14Rik	-1.39321	7.34302e-06	6.52596	5.26091	3.58558	2.44484	15.9234	14.7428	8.32465	6.23506
ENSMUSG00000063802	Hspbp1	-2.22699	7.34302e-06	0.268304	0.207992	0.0862754	0.0469761	3.48321	3.37695	0.719404	0.580292
ENSMUSG00000031832	Taf1c	-1.93782	7.48634e-06	0.761082	0.975388	0.314661	0.295249	2.65586	3.16026	1.44921	1.61464
ENSMUSG00000035726	Supt16	-1.30385	7.49606e-06	0.85847	0.838751	0.545059	0.377637	8.59573	8.26503	3.89994	2.8726
ENSMUSG00000022177	Haus4	-1.59165	7.52908e-06	1.35813	1.48428	0.807462	0.444047	9.89302	9.96973	4.68481	3.30392
ENSMUSG00000028293	Slc35a1	-2.11384	7.60041e-06	0.209697	0.225374	0.0727597	0.0617127	2.21026	1.84095	0.578036	0.600296
ENSMUSG00000025190	Got1	-1.29708	7.68096e-06	1.50558	1.70577	1.05271	0.698695	10.4148	10.3362	5.28453	3.38157
ENSMUSG00000026355	Mcm6	-1.19877	7.71854e-06	1.24358	1.27917	0.832126	0.647528	15.415	14.9127	7.34174	5.04009
ENSMUSG00000091269	Gm6682	-1.93494	7.74662e-06	4.67675	5.62603	2.10603	1.46149	18.9235	20.7992	8.13362	4.88844
ENSMUSG00000024608	Rps14	-1.23444	7.81758e-06	1.5179	1.23861	0.894115	0.688062	22.2347	21.5727	11.5676	13.0149
ENSMUSG00000028898	Trnau1ap	-2.15736	7.81758e-06	0.281988	0.32273	0.106312	0.0725042	4.21998	4.14062	1.23359	1.22112
ENSMUSG00000030059	Tmf1	-1.27604	7.89082e-06	0.778607	0.737801	0.443983	0.402441	1.78923	1.77424	1.04511	0.981437
ENSMUSG00000038650	Rnh1	-1.64104	7.89082e-06	0.651138	0.791951	0.311997	0.313943	9.55313	8.89	4.36016	2.70641
ENSMUSG00000087179	5730471H19Rik	-1.98116	7.90693e-06	0.165489	0.175061	0.0674379	0.0467991	0.723821	0.79006	0.383013	0.397792
ENSMUSG00000032397	Tipin	-0.991146	7.94826e-06	4.95985	4.78551	3.49005	3.15498	22.1005	21.4735	13.9342	13.1832
ENSMUSG00000074884	Serf2	-1.31889	8.0124e-06	2.45442	2.1201	1.35062	1.12324	30.3927	28.2973	12.077	13.3227
ENSMUSG00000022247	Brix1	-1.06591	8.11251e-06	7.5878	6.56431	4.86016	4.30602	32.1933	28.2656	17.0631	16.9325
ENSMUSG00000018446	C1qbp	-1.07967	8.40942e-06	11.6662	11.162	7.90249	6.70363	80.1028	81.0408	46.9881	44.2074
ENSMUSG00000037958	Nsrp1	-1.51603	8.41213e-06	0.674292	0.630071	0.387437	0.220522	1.51417	1.47689	0.984815	0.709247
ENSMUSG00000026848	Tor1b	-2.19073	8.44442e-06	0.856442	0.994499	0.338901	0.190386	2.0978	2.03636	0.758492	0.503963
ENSMUSG00000001783	Rtcb	-1.42443	8.56045e-06	1.5189	1.54581	0.959469	0.565662	11.6894	11.9778	6.86572	4.56418
ENSMUSG00000103653	Gstp-ps	-2.08078	8.60201e-06	7.38969	10.3645	2.9433	2.68754	89.8771	92.1895	44.2528	38.9155
ENSMUSG00000007656	Arpp19	-1.10898	8.77052e-06	1.44046	1.43042	0.91146	0.893489	11.932	12.0979	7.18546	7.39594
ENSMUSG00000074731	Zfp345	-2.04692	8.78572e-06	0.396814	0.423113	0.152505	0.110642	0.735759	0.728242	0.249553	0.283822
ENSMUSG00000074800	Gm4149	-0.987405	8.78786e-06	226.387	234.878	153.942	162.21	3368.56	3675.11	3853.16	4021.59
ENSMUSG00000047565	Acot10	-1.67181	8.81585e-06	6.10545	5.74804	2.77707	2.20668	63.8228	55.3529	25.6932	18.9775
ENSMUSG00000044783	Hjurp	-1.45727	8.99289e-06	0.953306	1.08963	0.578038	0.416046	2.04499	2.37979	1.40534	1.15419
ENSMUSG00000022711	Pmm2	-1.96588	8.99289e-06	0.270344	0.222125	0.0775345	0.0957558	3.21357	3.0843	2.36414	1.90691
ENSMUSG00000037816	Fbxw17	-3.80747	9.02605e-06	0.146475	0.129752	0.0163764	0.00852339	0.944766	0.692011	0.1044	0.136374
ENSMUSG00000028018	Gstcd	-2.54151	9.02605e-06	0.0496808	0.0431764	0.0153634	0.00492073	0.130544	0.116524	0.0440221	0.0719656
ENSMUSG00000074211	Sdhaf1	-2.49795	9.22125e-06	2.45785	1.65885	0.66736	0.272423	7.44378	6.98098	2.01517	1.6073
ENSMUSG00000051316	Taf7	-1.06261	9.23612e-06	15.8506	15.7864	11.0189	9.46088	69.0363	68.9688	36.1272	29.2959
ENSMUSG00000100679	Gm28778	-1.48072	9.24742e-06	0.488493	0.470989	0.265273	0.194917	1.81041	1.60725	0.881643	0.747182
ENSMUSG00000044894	Uqcrq	-1.17745	9.26505e-06	11.6773	10.3303	7.03163	6.13065	129.692	130.528	70.7642	78.7893
ENSMUSG00000027405	Nop56	-1.28349	9.2887e-06	20.9324	18.4885	13.4895	8.30557	76.9869	68.0692	47.7002	36.2362
ENSMUSG00000034442	Trmt5	-1.66813	9.57379e-06	2.14006	1.76386	1.02612	0.607464	4.66289	4.29835	2.2419	1.7414
ENSMUSG00000046550	Spin2c	-3.71958	9.57473e-06	1.27023	0.966085	0.0806906	0.167988	2.94462	2.75618	0.387315	0.201585
ENSMUSG00000031862	Atp13a1	-2.06658	9.59205e-06	0.386536	0.404661	0.161078	0.0858806	1.7359	1.51834	0.626632	0.45394
ENSMUSG00000019179	Mdh2	-1.20959	9.71745e-06	4.56744	4.59178	3.14648	2.17973	69.8466	64.7278	38.0503	29.0422
ENSMUSG00000118664	Tusc3	-2.10103	9.95331e-06	0.0386268	0.0329233	0.0117982	0.0106591	0.232557	0.203811	0.106852	0.142276
ENSMUSG00000082496	Gm6798	-0.996264	9.95331e-06	250.631	234.254	170.517	159.22	3494.09	3385.21	3224.71	3014.82
ENSMUSG00000031770	Herpud1	-1.58392	1.00943e-05	2.51009	1.6556	1.12254	0.743588	4.43992	3.26628	2.21593	1.76792
ENSMUSG00000006651	Aplp1	-1.6858	1.02201e-05	0.778695	0.837098	0.370471	0.302082	4.20275	4.03873	1.85235	1.57468
ENSMUSG00000026753	Ppp6c	-1.34376	1.02285e-05	0.544765	0.473632	0.281184	0.262052	1.95026	1.93027	0.774526	0.925635
ENSMUSG00000115338	Pnp	-1.19343	1.02831e-05	0.689414	0.703752	0.430228	0.393226	4.67743	4.99009	2.90762	2.73868
ENSMUSG00000028318	Polr1e	-1.83029	1.0381e-05	0.398665	0.354106	0.137702	0.150883	2.849	2.70843	1.19221	0.909073
ENSMUSG00000113030	Gm48778	-1.6904	1.04558e-05	0.323152	0.243117	0.114202	0.125361	0.674161	0.564837	0.35195	0.471186
ENSMUSG00000039660	Spout1	-1.75683	1.04623e-05	2.06045	2.4061	1.1323	0.609647	20.4298	20.1884	8.77206	6.35388
ENSMUSG00000029390	Tmed2	-1.29544	1.05422e-05	2.03158	1.71895	1.03274	1.04391	8.74411	6.8641	3.56645	3.13173
ENSMUSG00000005609	Ctr9	-2.17289	1.05478e-05	0.165761	0.190343	0.0582113	0.0469915	0.864931	0.949621	0.349268	0.277002
ENSMUSG00000031107	Rbmx2	-2.22195	1.05478e-05	0.570997	0.430628	0.205198	0.0733568	1.3348	1.23714	0.387595	0.254591
ENSMUSG00000083829	Gm2199	-1.37528	1.06177e-05	20.2068	20.2168	11.9669	8.92545	262.421	247.065	167.351	137.607
ENSMUSG00000051579	Tceal8	-0.964467	1.06177e-05	24.9699	24.423	16.0926	18.3972	72.9315	70.4509	42.4771	46.3666
ENSMUSG00000048930	Tada3	-1.57238	1.06865e-05	0.796219	0.856245	0.398391	0.34892	5.92249	5.43256	2.76676	1.93908
ENSMUSG00000048012	Zfp473	-2.04899	1.07547e-05	0.27995	0.325374	0.11654	0.0762524	0.652224	0.773862	0.289685	0.249553
ENSMUSG00000063052	Lrrc40	-1.76082	1.08507e-05	0.368112	0.301028	0.165853	0.0959123	2.86431	2.82282	0.937784	0.728933
ENSMUSG00000003848	Nob1	-1.29621	1.10489e-05	5.1208	4.78907	3.36304	2.0567	20.0982	18.4532	12.0572	7.95691
ENSMUSG00000024048	Myl12a	-1.11576	1.1111e-05	3.79179	3.66367	2.44822	2.20644	29.9615	28.0404	16.5652	14.3787
ENSMUSG00000109448	Gm45224	-2.05276	1.11498e-05	15.909	11.5014	4.40735	4.58777	104.324	92.4269	43.6012	33.4252
ENSMUSG00000035198	Tubg1	-1.57233	1.11508e-05	2.09514	1.68158	0.980201	0.722078	17.8222	17.5504	8.5001	5.79755
ENSMUSG00000021254	Gpatch2l	-2.94473	1.11772e-05	0.0595388	0.0574523	0.011747	0.00815191	0.148263	0.197636	0.0698293	0.112768
ENSMUSG00000044709	Gemin7	-1.25264	1.12087e-05	1.74167	1.66436	1.04317	0.884784	5.02229	5.2652	3.1295	2.94928
ENSMUSG00000049489	Ccnq	-1.45678	1.12886e-05	14.4287	12.0455	7.50684	5.43111	25.8573	22.3099	13.2568	11.361
ENSMUSG00000069117	Rps18-ps6	-2.82642	1.12901e-05	4.77926	6.23792	1.10352	0.967322	34.286	34.462	22.2446	19.951
ENSMUSG00000042195	Slc35f2	-1.78525	1.13571e-05	0.171294	0.15506	0.0712927	0.0552946	0.777699	0.653466	0.363453	0.379787
ENSMUSG00000035086	Becn1	-2.00045	1.1474e-05	0.463863	0.424951	0.191488	0.0996634	4.03204	3.92641	1.05917	0.768239
ENSMUSG00000117098	Gm49909	-1.00795	1.15097e-05	2.5709	2.45077	1.76196	1.62279	24.7794	23.0924	16.7821	14.6727
ENSMUSG00000002031	Ift46	-1.26324	1.15443e-05	0.917425	0.972612	0.598331	0.459483	7.10891	6.82626	4.1998	3.66524
ENSMUSG00000074832	Zfp998	-3.06356	1.16191e-05	0.0962696	0.149611	0.0212432	0.0176903	0.266008	0.391483	0.138789	0.156264
ENSMUSG00000119584	Rn18s-rs5	2.69892	1.19238e-05	48.7977	97.517	483.844	808.205	963.881	2010.47	15156.4	25421.4
ENSMUSG00000029147	Ppm1g	-1.40641	1.22233e-05	0.898999	0.818003	0.4899	0.380114	7.2405	7.9986	3.85593	2.57424
ENSMUSG00000051176	Zfp42	-1.15319	1.23218e-05	5.74156	5.7378	4.05441	2.89706	11.2631	11.6393	7.84089	6.17547
ENSMUSG00000041353	Tmem29	-1.68951	1.23742e-05	0.153829	0.172903	0.050428	0.0906184	0.873599	0.918724	0.391215	0.423254
ENSMUSG00000023094	Msrb2	-1.66403	1.24076e-05	0.411076	0.346107	0.174425	0.146982	1.45858	1.32106	0.768301	0.628274
ENSMUSG00000002319	Ipo4	-2.50211	1.25489e-05	0.375399	0.423824	0.123443	0.0578235	4.84154	5.96614	0.941256	0.803105
ENSMUSG00000021196	Pfkp	-1.24006	1.25913e-05	0.269429	0.291788	0.166668	0.154323	3.76778	3.71677	1.78519	1.43511
ENSMUSG00000105388	Rpl36a-ps2	-1.06007	1.2743e-05	121.112	135.826	75.5192	92.5578	1888.58	2183.57	2232.18	2557.81
ENSMUSG00000034566	Atp5h	-1.9801	1.30026e-05	1.33646	1.31542	0.487905	0.412651	18.615	17.9461	9.91819	9.9671
ENSMUSG00000081070	Gm13181	-2.12435	1.33942e-05	4.19835	4.82989	1.40207	1.39601	46.4545	45.24	18.5317	14.5312
ENSMUSG00000038563	Efl1	-1.88974	1.3561e-05	0.0563744	0.0572623	0.0252113	0.0152212	0.231812	0.236152	0.125048	0.11757
ENSMUSG00000049792	Bag5	-1.50401	1.35976e-05	3.29309	3.34776	1.81496	1.31349	6.5398	5.90423	3.43114	2.64496
ENSMUSG00000089872	Rps6kc1	-3.57159	1.36155e-05	0.0107443	0.0108463	0.00077003	0.00192372	0.0374673	0.0395889	0.0304932	0.0602767
ENSMUSG00000112364	4930503E24Rik	-2.332	1.36301e-05	0.0873004	0.0755733	0.0264591	0.0159133	1.18539	1.1512	0.427461	0.412521
ENSMUSG00000079109	Pms2	-1.70615	1.36717e-05	0.388494	0.32024	0.161523	0.129987	1.36216	1.32398	0.632519	0.689496
ENSMUSG00000083678	Gm12989	-1.24818	1.37021e-05	27.2693	25.9767	15.9126	14.3833	213.45	198.317	115.979	102.539
ENSMUSG00000023892	Zfp51	-1.70665	1.38636e-05	0.532521	0.478887	0.192747	0.231848	0.91563	0.822027	0.39192	0.432486
ENSMUSG00000027133	Nop10	-0.961821	1.40287e-05	50.0463	51.4779	33.4072	37.5506	436.452	468.807	317.829	395.947
ENSMUSG00000034509	Mad2l1bp	-1.38215	1.41824e-05	2.98661	2.92098	1.78051	1.25393	5.49121	5.33032	3.19647	2.27688
ENSMUSG00000114687	Gm5452	-1.77345	1.42233e-05	9.00308	7.13509	3.5949	2.7215	176.028	170.379	92.9446	48.3067
ENSMUSG00000091639	Gm3756	-2.36611	1.42233e-05	2.92506	2.87901	0.769485	0.750924	16.8191	17.5704	7.06964	4.3053
ENSMUSG00000024856	Cdk2ap2	-1.5209	1.43489e-05	8.11821	7.33492	4.3432	2.84177	39.164	38.797	16.1496	14.9839
ENSMUSG00000023452	Pisd	-1.34235	1.43489e-05	0.320098	0.372024	0.204031	0.162209	2.51472	2.43094	1.15221	0.780801
ENSMUSG00000069899	Gm12166	-2.94811	1.4592e-05	4.87725	2.84471	0.97614	0.280303	35.1644	21.7502	6.09246	4.55493
ENSMUSG00000020180	Snrpd3	-1.1665	1.46643e-05	2.25726	1.71258	1.23391	1.16984	27.6427	23.4554	13.3496	15.7312
ENSMUSG00000020186	Csrp2	-1.68983	1.49738e-05	0.476069	0.523529	0.252988	0.157323	5.43366	5.3857	3.37263	2.71553
ENSMUSG00000038070	Cntln	-1.26842	1.5e-05	0.073207	0.0725176	0.0432924	0.0383529	0.195846	0.201798	0.151721	0.161082
ENSMUSG00000066113	Adamtsl1	2.08895	1.54205e-05	0.00140262	0.00138054	0.00798343	0.00808765	0.00924455	0.00916174	0.0442653	0.0689305
ENSMUSG00000027905	Ddx20	-1.31858	1.54863e-05	2.63713	2.66342	1.6948	1.15182	6.6398	6.7757	4.38057	3.39714
ENSMUSG00000021178	Psmc1	-1.18118	1.55323e-05	2.3267	2.06928	1.42114	1.19778	24.9471	22.0997	10.6979	9.35704
ENSMUSG00000063904	Dpp3	-1.66996	1.56919e-05	0.423467	0.370488	0.181025	0.154613	4.24297	4.07537	1.95723	1.29811
ENSMUSG00000115423	Gm56450	-1.28216	1.57181e-05	1.64738	1.6101	0.933791	0.878168	5.9444	5.8678	2.84001	3.33167
ENSMUSG00000044065	Gm9788	-1.62163	1.57371e-05	11.387	11.5243	5.93397	3.96818	47.7998	41.5383	23.8797	13.4768
ENSMUSG00000066148	Prpf4	-1.25434	1.57808e-05	0.999521	1.21081	0.666199	0.581621	2.82557	3.43693	1.91801	1.93501
ENSMUSG00000106831	Ube2n-ps1	-1.51518	1.57808e-05	21.7145	25.747	12.2097	10.0494	139.303	136.984	63.959	49.9514
ENSMUSG00000041623	D11Wsu47e	-1.78073	1.58582e-05	0.757333	0.829477	0.37243	0.23857	2.01006	2.00644	1.07591	0.854876
ENSMUSG00000028691	Prdx1	-0.911041	1.58797e-05	12.0204	11.2717	7.89462	8.98585	144.336	130.83	101.265	116.794
ENSMUSG00000031812	Map1lc3b	-1.14493	1.59306e-05	5.55106	5.25877	3.73927	2.85062	37.5044	34.1615	23.1222	17.9759
ENSMUSG00000025269	Apex2	-1.7164	1.65739e-05	0.11185	0.105196	0.048168	0.0404976	0.408459	0.377563	0.209346	0.205381
ENSMUSG00000018661	Cog1	-2.55854	1.68623e-05	0.241148	0.16358	0.041899	0.0530956	3.72476	3.82007	1.9055	2.0366
ENSMUSG00000021965	Ska3	-1.30478	1.70084e-05	1.23255	1.1956	0.775348	0.542667	2.88684	2.80046	1.85619	1.43098
ENSMUSG00000031843	Mphosph6	-1.02361	1.70239e-05	4.71428	4.44509	3.10358	3.00999	11.8451	10.7284	6.50772	6.60617
ENSMUSG00000026942	Traf2	-1.8721	1.71612e-05	0.283793	0.285267	0.133891	0.0702719	1.69873	2.17318	1.38617	1.50148
ENSMUSG00000052926	Rnaseh2a	-1.40717	1.71665e-05	1.28905	1.19899	0.735455	0.520685	15.4464	14.196	7.02273	6.17089
ENSMUSG00000059343	Aldoart1	-1.79794	1.72564e-05	5.14123	4.66887	2.46118	1.25617	103.62	109.677	51.8595	33.7184
ENSMUSG00000000028	Cdc45	-1.6976	1.72765e-05	0.393613	0.312843	0.181814	0.107532	1.85349	1.91161	0.775808	0.561318
ENSMUSG00000046818	Ddit4l	1.31604	1.73514e-05	1.6128	1.54473	6.23835	4.34933	3.05218	3.15774	12.627	10.0206
ENSMUSG00000106294	Gm8539	-2.32074	1.7548e-05	8.14378	7.78653	1.95107	2.43713	77.4822	82.9037	21.5919	21.2572
ENSMUSG00000028857	Tmem222	-1.67539	1.7609e-05	1.48345	1.34289	0.79599	0.375313	6.29102	5.31297	3.46408	2.14794
ENSMUSG00000039130	Zc3hc1	-1.28472	1.7651e-05	1.18705	1.17302	0.77594	0.522875	8.75865	8.4904	4.63978	3.25283
ENSMUSG00000021840	Mapk1ip1l	-1.31523	1.79126e-05	0.588962	0.598091	0.334465	0.310077	2.07071	2.08412	1.12359	1.05535
ENSMUSG00000050088	1600012H06Rik	-1.76134	1.79126e-05	0.590438	0.4131	0.216729	0.182137	2.5147	2.23704	1.32622	1.08454
ENSMUSG00000070047	Fat1	1.121	1.81135e-05	0.145203	0.150774	0.475587	0.394303	0.355273	0.382093	1.17962	1.10625
ENSMUSG00000029447	Cct6a	-1.03152	1.81164e-05	9.52358	10.6546	7.44226	5.87634	85.6495	88.4732	53.4487	43.1905
ENSMUSG00000026857	Ntmt1	-1.61266	1.81847e-05	1.29542	1.16563	0.715589	0.35237	5.243	4.92279	2.61597	1.58789
ENSMUSG00000003039	Fam32a	-1.24274	1.81847e-05	6.48867	5.95829	4.09284	2.9801	32.8038	31.9815	20.4572	16.2459
ENSMUSG00000036167	Pphln1	-1.45022	1.82004e-05	0.113243	0.119465	0.0584079	0.0567942	0.722626	0.751274	0.414102	0.451441
ENSMUSG00000009293	Ube2g2	-1.64525	1.82471e-05	0.317	0.350707	0.145613	0.142994	0.97803	1.0618	0.469807	0.529077
ENSMUSG00000002477	Snrpd1	-1.03082	1.83969e-05	1.87533	1.79387	1.10732	1.34523	11.6836	11.3816	6.55545	8.09926
ENSMUSG00000023277	Twf2	-2.16276	1.84985e-05	0.374907	0.354991	0.106116	0.115983	3.86771	3.91424	1.33971	1.1764
ENSMUSG00000112850	Gm9176	-3.38331	1.8731e-05	2.23777	1.99765	0.174551	0.423959	4.26738	3.63675	0.378194	0.605656
ENSMUSG00000059058	Tma7-ps	-1.72131	1.87533e-05	34.9717	38.2456	13.7015	16.6975	687.478	662.237	422.074	404.218
ENSMUSG00000026020	Nop58	-1.07163	1.88631e-05	3.17654	3.2629	2.37434	1.75785	15.2447	15.0282	9.6714	8.28757
ENSMUSG00000056941	Commd7	-1.81337	1.89772e-05	0.430278	0.423503	0.182969	0.141239	2.43824	2.15371	1.61588	1.27115
ENSMUSG00000060647	Gm7099	-2.03236	1.9036e-05	8.73241	9.52688	2.70544	3.4284	30.616	34.1725	10.5865	10.0403
ENSMUSG00000104560	Gm8115	-2.33771	1.91143e-05	5.86029	5.0665	1.59373	1.29031	37.2208	41.3894	10.0493	7.46536
ENSMUSG00000050334	C130071C03Rik	-1.72534	1.92007e-05	0.0388232	0.0304728	0.0157963	0.0122965	0.74575	0.720706	0.418397	0.252793
ENSMUSG00000019210	Atp6v1e1	-1.20357	1.92007e-05	1.1539	1.17399	0.786866	0.571449	8.40463	8.13536	4.03841	3.21202
ENSMUSG00000040822	1700123O20Rik	-1.12251	1.92427e-05	7.32763	7.35167	4.96014	4.13655	18.1066	17.6567	10.309	9.45711
ENSMUSG00000081113	Gm7308	-1.32581	1.93756e-05	51.3753	64.0421	36.8106	24.7357	284.65	265.922	133.539	90.7481
ENSMUSG00000055900	Tmem69	-3.32202	1.94124e-05	0.487524	0.58648	0.0681334	0.0788028	1.77404	2.09267	0.878163	1.26084
ENSMUSG00000025781	Atp5c1	-1.14841	1.96181e-05	1.27542	1.2811	0.8593	0.695088	20.3686	18.1719	12.2523	11.1823
ENSMUSG00000027715	Ccna2	-1.06951	1.9669e-05	5.06384	4.91324	3.36293	3.07233	36.1669	37.054	19.6186	18.1268
ENSMUSG00000081999	Gm13461	-1.05732	1.96733e-05	79.4616	73.3064	55.9215	43.2894	695.139	631.264	479.355	383.556
ENSMUSG00000091825	Gm5778	-1.451	1.97076e-05	11.6355	11.4523	6.38284	4.93564	138.647	123.46	92.5208	58.4684
ENSMUSG00000052299	Ltn1	-1.81892	1.97076e-05	0.104153	0.141468	0.0506542	0.0424247	0.577008	0.658134	0.269574	0.288488
ENSMUSG00000026516	Nvl	-1.39523	1.98124e-05	0.252277	0.244283	0.14274	0.110546	1.69036	1.69088	0.86386	0.769065
ENSMUSG00000044285	Ubb-ps	-1.2628	1.98124e-05	26.0644	22.712	15.4727	11.8969	117.708	110.559	77.4303	49.0488
ENSMUSG00000032557	Uba5	-1.54195	1.99014e-05	0.588642	0.700799	0.336942	0.254334	4.43773	4.23255	1.7852	1.60805
ENSMUSG00000112515	Gm4928	-1.36373	2.00844e-05	17.0744	15.7932	9.23821	7.9804	188.093	177.707	94.6054	72.3823
ENSMUSG00000113836	Gm3325	-1.8429	2.02752e-05	0.214154	0.188083	0.0893262	0.0594324	0.387125	0.368058	0.22746	0.185966
ENSMUSG00000031432	Prps1	-1.19075	2.0521e-05	0.987952	0.995898	0.582314	0.597468	8.27372	7.77623	4.04283	3.66817
ENSMUSG00000020390	Ube2b	-1.07511	2.06807e-05	2.1801	2.31488	1.51538	1.36858	6.66248	6.56509	4.32845	4.57673
ENSMUSG00000024437	Gm8615	-2.42522	2.12646e-05	5.34202	4.32085	1.74446	0.553994	31.153	28.6842	11.1763	5.90926
ENSMUSG00000027423	Snx5	-1.0637	2.13113e-05	4.8067	4.51572	3.41913	2.60446	32.7888	30.724	17.2916	14.0602
ENSMUSG00000074092	Gm6181	-3.65252	2.14014e-05	7.94811	9.5614	0.37026	1.79861	96.2605	89.7468	20.4877	22.3542
ENSMUSG00000005262	Ufd1	-1.53752	2.14965e-05	0.727243	0.544784	0.355202	0.231089	4.23439	3.71088	1.63171	1.30854
ENSMUSG00000025218	Poll	-4.40402	2.15765e-05	0.247065	0.215383	0.0236766	0	0.98826	1.1186	0.193359	0.15609
ENSMUSG00000020089	Ppa1	-1.1216	2.16288e-05	1.25369	1.20259	0.822935	0.701716	19.2103	17.7903	11.9485	10.1736
ENSMUSG00000012483	Rpa3	-1.39845	2.16802e-05	3.87014	4.0041	1.72071	2.38821	45.2537	47.7125	22.0372	26.0189
ENSMUSG00000112222	Tyms-ps	-2.65779	2.18415e-05	3.37614	3.38568	0.712194	0.741349	36.5005	37.3678	7.79853	3.41021
ENSMUSG00000019857	Asf1a	-1.04137	2.20479e-05	3.6274	3.26203	2.31783	2.22503	9.53595	9.21097	5.69397	5.65233
ENSMUSG00000039640	Mrpl12	-1.15348	2.2199e-05	8.63887	9.97151	6.44633	4.79846	53.3123	52.7305	33.3292	27.2827
ENSMUSG00000064037	Gpn1	-1.40982	2.23521e-05	1.10386	1.06752	0.672681	0.418264	9.15495	8.11066	4.95093	3.27516
ENSMUSG00000039810	Zc3h10	-2.55898	2.24305e-05	0.481372	0.700818	0.140153	0.128384	1.22349	1.46086	0.454097	0.338467
ENSMUSG00000060461	Dppa5a	-0.857289	2.24702e-05	384.192	373.251	277.852	290.732	5356.74	5218.23	4696.3	4990.64
ENSMUSG00000063108	Zfp26	-1.72161	2.24741e-05	0.196652	0.267722	0.0924658	0.0983899	0.369412	0.548106	0.334932	0.387143
ENSMUSG00000099875	Rbm3-ps	-1.3653	2.31154e-05	40.7376	41.4533	25.5758	17.0678	299.578	274.011	213.505	134.062
ENSMUSG00000031429	Psmd10	-1.49898	2.31154e-05	1.48876	1.14046	0.600624	0.670162	9.9859	8.34261	4.09445	4.09452
ENSMUSG00000031021	Tmem9b	-3.35712	2.34587e-05	0.191528	0.104355	0.0248549	0.0119411	0.837936	0.669893	0.116627	0.0796074
ENSMUSG00000031388	Naa10	-1.71719	2.34724e-05	1.49393	1.39123	0.642407	0.534964	21.1448	21.2078	8.21639	6.76729
ENSMUSG00000059142	Zfp945	-2.48295	2.34949e-05	0.173963	0.171224	0.0334788	0.0531038	0.462	0.471567	0.181742	0.285433
ENSMUSG00000013646	Sh3bp5l	-3.10802	2.35578e-05	0.123393	0.192296	0.0306572	0.0159561	0.335904	0.522911	0.118797	0.103715
ENSMUSG00000026843	Fubp3	-1.2781	2.36236e-05	0.380556	0.365616	0.222902	0.19197	2.02877	2.0633	0.978735	0.993105
ENSMUSG00000025337	Sbds	-1.257	2.3735e-05	2.36713	2.18937	1.45626	1.10748	13.2869	12.5449	8.35518	7.787
ENSMUSG00000026637	Traf5	-1.95069	2.37876e-05	0.0977484	0.144314	0.0430313	0.0412379	1.21575	1.26756	0.637956	0.602926
ENSMUSG00000030330	Ing4	-1.86671	2.41687e-05	0.711256	0.772476	0.335906	0.199804	5.54902	5.76943	2.53643	1.9695
ENSMUSG00000026209	Dnpep	-1.59858	2.46292e-05	1.00464	0.875159	0.474461	0.356134	15.4506	14.5481	5.66771	4.23329
ENSMUSG00000061461	Smim20	-1.35553	2.46387e-05	1.34295	1.28175	0.773481	0.603858	5.30059	5.00184	2.68728	2.57528
ENSMUSG00000039929	Urb1	-2.5433	2.50552e-05	0.0544388	0.0565043	0.0121729	0.0138231	0.262296	0.261089	0.0641842	0.112889
ENSMUSG00000021871	Gm49342	-1.20472	2.52706e-05	1.07056	1.05987	0.661457	0.58653	7.5315	7.83501	4.65295	4.39351
ENSMUSG00000032109	Nlrx1	-2.93349	2.57086e-05	0.205504	0.144478	0.0348743	0.0256249	0.92477	0.978835	0.242069	0.234895
ENSMUSG00000027274	Mkks	-1.16035	2.57163e-05	1.32062	1.2249	0.791907	0.751137	4.2068	4.15359	2.26655	2.47683
ENSMUSG00000026748	Plxdc2	1.83027	2.58058e-05	0.00598127	0.00631785	0.0364537	0.0220715	0.0196944	0.0241227	0.0990854	0.103396
ENSMUSG00000078184	Rbm8a2	-1.1566	2.62656e-05	21.8682	20.0232	13.8562	11.5084	154.907	140.034	90.7596	80.153
ENSMUSG00000036822	Topors	-1.07973	2.66057e-05	3.46874	4.15291	2.61299	2.25008	6.47687	7.66218	4.85723	4.66562
ENSMUSG00000062054	Iah1	-2.07856	2.68425e-05	0.572587	0.679373	0.192928	0.209954	6.82398	7.11798	2.99038	3.48706
ENSMUSG00000113913	Gm46323	-1.97601	2.75492e-05	0.0478442	0.0526969	0.0152832	0.0198861	0.167455	0.192848	0.0885154	0.115339
ENSMUSG00000101795	Gm5835	-1.06808	2.77081e-05	127.449	124.946	94.8495	67.5664	1517.28	1484.58	1362.48	1015.79
ENSMUSG00000035078	Mtmr9	-2.59739	2.80182e-05	0.126959	0.134391	0.0241037	0.0362418	1.12107	1.18358	0.290584	0.245329
ENSMUSG00000024118	Tedc2	-1.9114	2.85167e-05	1.07565	0.959768	0.415856	0.304186	3.61901	3.89844	1.4555	0.807262
ENSMUSG00000042712	Tceal9	-0.948033	2.8541e-05	33.7104	31.426	22.5756	23.3352	187.641	185.16	109.764	117.729
ENSMUSG00000033009	Ogfod1	-2.25266	2.87477e-05	0.161253	0.1139	0.0371176	0.0419488	0.952339	0.855186	0.307546	0.280395
ENSMUSG00000061759	Armt1	-1.42514	2.94328e-05	0.532094	0.592027	0.32044	0.239324	2.17979	2.30739	0.967069	0.993195
ENSMUSG00000069135	Cep43	-1.19244	2.98221e-05	0.698228	0.689066	0.445485	0.372711	2.29205	2.23397	1.25319	1.13764
ENSMUSG00000034432	Cops8	-1.34964	3.01777e-05	3.31907	3.26127	2.20133	1.25048	14.902	14.6508	8.21726	5.10666
ENSMUSG00000026078	Pdcl3	-1.32213	3.06124e-05	1.56853	1.39586	0.904847	0.688191	10.4736	9.69211	4.23009	3.81421
ENSMUSG00000105143	Gm8069	-1.54301	3.06202e-05	52.9874	70.4067	30.044	26.8691	302.028	311.801	127.369	109.238
ENSMUSG00000027243	Harbi1	-1.79409	3.09319e-05	0.577738	0.751036	0.29859	0.209323	2.36546	2.60717	1.27663	1.18617
ENSMUSG00000018322	Tomm34	-1.74889	3.10122e-05	0.390117	0.442547	0.194056	0.134666	4.38717	4.35388	1.47113	1.16198
ENSMUSG00000042854	Trp53rkb	-2.66929	3.10122e-05	0.518099	0.411243	0.121456	0.0680766	0.977704	0.86361	0.326997	0.20423
ENSMUSG00000032135	Mcam	1.47309	3.10122e-05	0.52224	0.604317	2.41442	1.79049	2.17365	1.79211	10.3165	7.19483
ENSMUSG00000025981	Coq10b	-1.32919	3.10515e-05	0.640379	0.650442	0.354713	0.340307	1.26614	1.2203	0.73231	0.806528
ENSMUSG00000020630	Rnaseh1	-1.63399	3.13446e-05	1.0329	0.982178	0.535001	0.325992	3.44885	3.15331	1.52671	1.1138
ENSMUSG00000032218	Ccnb2	-1.20441	3.13909e-05	1.65739	1.56504	1.04173	0.842043	20.3724	18.9296	11.666	10.5451
ENSMUSG00000024571	Naa12	-1.19629	3.14511e-05	15.8466	15.4723	11.3716	7.00238	58.725	56.5814	41.8012	29.2806
ENSMUSG00000049969	Plekhf2	-0.952512	3.15446e-05	2.67742	2.94495	1.93982	2.00339	4.92223	5.58617	3.64287	3.81312
ENSMUSG00000031353	Rbbp7	-1.08307	3.18238e-05	2.39806	2.2897	1.66131	1.32466	20.7655	19.1617	10.7401	8.61573
ENSMUSG00000106390	Gm5551	-2.91602	3.21041e-05	4.22364	3.40885	0.61388	0.786475	35.732	37.331	2.64441	1.86788
ENSMUSG00000004698	Hdac9	2.16538	3.21593e-05	0.00120659	0.00118759	0.00696987	0.00764526	0.00616703	0.00606992	0.0392336	0.0578855
ENSMUSG00000097772	5430416N02Rik	-1.44977	3.21806e-05	1.05379	1.20796	0.578309	0.53842	2.53809	2.85862	1.49067	1.62274
ENSMUSG00000050188	Lsm10	-1.34728	3.25644e-05	8.46665	7.04678	4.5171	3.69938	24.7167	22.8947	11.6249	10.2338
ENSMUSG00000058922	Gm10052	-1.36799	3.25644e-05	21.9787	19.7204	13.135	8.47918	194.53	178.38	116.959	61.7567
ENSMUSG00000026134	Prim2	-1.6148	3.27324e-05	0.0518133	0.0363888	0.020969	0.0179016	0.347581	0.272252	0.128681	0.141643
ENSMUSG00000019139	Isyna1	-1.59755	3.2901e-05	3.05613	2.59514	1.29528	1.23207	79.2996	78.739	44.0729	33.7307
ENSMUSG00000061374	Fiz1	-1.41807	3.32479e-05	1.7244	1.65219	0.972496	0.719271	3.57088	4.08541	2.41844	1.91805
ENSMUSG00000027242	Wdr76	-1.62615	3.34042e-05	0.227716	0.189533	0.0939776	0.0889315	0.510451	0.499405	0.284496	0.307703
ENSMUSG00000067121	Gm7027	-1.43643	3.34697e-05	15.2815	14.1757	8.42921	6.13806	153.559	145.817	114.872	100.648
ENSMUSG00000042396	Rbm7	-1.08221	3.34878e-05	6.05032	5.29434	3.87104	3.38191	15.8456	13.1185	8.44815	7.3189
ENSMUSG00000015961	Adss	-1.09062	3.34988e-05	0.833901	0.882328	0.576877	0.511531	6.21082	6.64653	3.44281	3.27339
ENSMUSG00000018565	Elp5	-1.07832	3.34988e-05	1.93254	2.04257	1.32191	1.22419	12.056	11.6053	7.2181	6.38192
ENSMUSG00000022570	Gfus	-1.84061	3.34988e-05	1.83098	1.67978	0.878228	0.407763	25.1477	22.7382	8.1631	5.97176
ENSMUSG00000036160	Surf6	-1.53707	3.35557e-05	0.801578	0.949968	0.496105	0.304613	1.71767	2.0368	1.06994	0.866242
ENSMUSG00000055102	Zfp819	-1.63237	3.3632e-05	1.01714	0.959838	0.539287	0.305089	1.69348	1.67714	1.01116	0.677297
ENSMUSG00000000409	Lck	-2.25845	3.38957e-05	0.140543	0.174613	0.0476546	0.0402206	1.20729	1.26311	0.546096	0.479966
ENSMUSG00000024806	Mlana	2.43442	3.39104e-05	0.0593051	0.0742908	0.500301	0.476861	0.280352	0.307776	1.48282	1.48078
ENSMUSG00000031783	Polr2c	-1.24605	3.41704e-05	1.145	1.1983	0.741349	0.586152	9.47884	9.07281	4.52911	4.06933
ENSMUSG00000108037	Gm44597	-1.75775	3.4326e-05	0.666014	0.684879	0.330636	0.196669	5.21877	5.15127	2.64231	2.12287
ENSMUSG00000020423	Btg2	1.16554	3.5096e-05	3.57005	3.20891	11.4217	9.13373	7.78919	8.24734	24.7897	20.9801
ENSMUSG00000024360	Etf1	-1.0634	3.52531e-05	1.96461	2.1084	1.49072	1.13508	12.4778	13.149	7.94307	6.81282
ENSMUSG00000047866	Lonp2	-2.13186	3.53452e-05	0.0513792	0.0459729	0.0182775	0.0108718	0.478761	0.436742	0.148831	0.175308
ENSMUSG00000019868	Vta1	-1.50016	3.55736e-05	0.189293	0.17615	0.0904261	0.0841142	1.57171	1.39565	0.500871	0.471307
ENSMUSG00000042745	Id1	-1.03353	3.55807e-05	73.0587	80.4147	57.3852	43.6824	148.881	169.88	117.242	103.271
ENSMUSG00000006728	Cdk4	-1.10859	3.56202e-05	11.8246	11.5731	8.44466	6.16949	191.705	186.712	128.579	97.6758
ENSMUSG00000009585	Apobec3	-1.52261	3.59583e-05	0.3846	0.466083	0.227091	0.167849	3.97581	4.31777	1.72536	1.39315
ENSMUSG00000022673	Mcm4	-1.07428	3.60729e-05	1.98546	2.23883	1.39703	1.31608	16.4275	16.7551	8.41113	6.96217
ENSMUSG00000021548	Ccnh	-1.42815	3.61481e-05	0.309723	0.294741	0.153052	0.151352	2.84569	2.47414	1.36503	1.38009
ENSMUSG00000101104	Gm29247	-1.37464	3.6228e-05	0.853424	0.697515	0.453477	0.350959	2.14412	1.82838	1.21377	1.24942
ENSMUSG00000107478	Gm45234	-1.59545	3.623e-05	0.46399	0.456684	0.207115	0.205519	10.4398	10.3333	4.57008	5.20246
ENSMUSG00000110277	Gm45871	-1.58676	3.62719e-05	0.626192	0.634328	0.298949	0.265972	1.06955	1.06171	0.705213	0.617054
ENSMUSG00000040667	Nup88	-1.21494	3.63688e-05	0.98313	0.956993	0.65127	0.471275	7.78059	7.4087	4.09283	3.01667
ENSMUSG00000039210	Gpatch2	-1.81397	3.67466e-05	0.0500707	0.040858	0.018421	0.0164358	0.142937	0.145741	0.0997604	0.13049
ENSMUSG00000079008	Gm14124	-1.85416	3.68076e-05	0.405778	0.466702	0.158021	0.169796	0.934658	1.10842	0.461319	0.45102
ENSMUSG00000004771	Rab11a	-1.30651	3.70616e-05	0.539783	0.630899	0.310451	0.332221	6.07256	5.63467	2.10207	2.20776
ENSMUSG00000020003	Pex7	-1.71913	3.75382e-05	0.136532	0.120517	0.0569398	0.047921	0.965477	0.844688	0.271978	0.278698
ENSMUSG00000108045	Gm5576	-1.32587	3.75382e-05	10.7047	11.0467	6.30041	5.37838	44.3748	47.5749	25.0171	18.3853
ENSMUSG00000016946	Kctd5	-1.48851	3.76008e-05	0.51152	0.701734	0.355537	0.218631	2.85637	2.98738	1.46643	1.0194
ENSMUSG00000027411	Vps16	-2.05555	3.79647e-05	0.216405	0.241781	0.0768349	0.0714717	2.60856	2.51568	0.613044	0.462864
ENSMUSG00000040331	Nsmce4a	-1.13121	3.89278e-05	0.687781	0.586502	0.407758	0.381002	3.65859	3.08373	1.73859	1.67106
ENSMUSG00000001056	Nhp2	-0.987723	3.89939e-05	15.8603	15.1781	11.3467	9.83414	148.703	144.113	108.138	106.386
ENSMUSG00000027660	Skil	-1.17748	3.89939e-05	0.667156	0.667075	0.367031	0.438748	1.17547	1.18197	0.677231	0.857777
ENSMUSG00000084342	Gm11224	-1.80921	3.89939e-05	4.66919	6.71278	1.99427	2.44225	62.5357	69.1932	30.7059	26.8037
ENSMUSG00000118270	Gm17819	-1.99255	3.91468e-05	55.3296	40.3242	20.7775	10.814	788.553	755.766	497.715	254.621
ENSMUSG00000021906	Oxnad1	-1.44243	3.91896e-05	0.572106	0.569533	0.299714	0.266327	3.54706	3.70358	2.32644	2.59098
ENSMUSG00000030036	Mogs	-6.93309	3.92875e-05	0.787882	0.404596	0.00957475	0	3.66537	2.09042	0.20107	0.199334
ENSMUSG00000024780	Cdc37l1	-1.41404	3.99868e-05	0.290388	0.296869	0.15695	0.140036	1.46157	1.41487	1.01704	1.01946
ENSMUSG00000042032	Mat2b	-1.00348	4.00803e-05	3.11055	2.85578	2.10384	1.92956	6.08905	5.70796	4.21178	4.06403
ENSMUSG00000028692	Akr1a1	-1.19969	4.00944e-05	3.42317	3.22558	2.36892	1.52023	41.7965	40.1893	28.3283	20.1609
ENSMUSG00000030287	Itpr2	-1.59489	4.00944e-05	0.0230822	0.0192235	0.010091	0.00878214	0.0905531	0.0790786	0.0764272	0.111585
ENSMUSG00000027122	Arl14ep	-1.22046	4.02863e-05	1.47455	1.40311	0.876326	0.792473	3.42428	3.45233	1.87041	1.89852
ENSMUSG00000047603	Zfp235	-2.83593	4.03103e-05	0.26339	0.322472	0.0574591	0.0523348	0.584596	0.708174	0.147239	0.171957
ENSMUSG00000106664	Gm17936	-1.58398	4.07899e-05	11.2089	10.5679	6.00211	3.63884	83.4177	69.0395	33.6712	15.4479
ENSMUSG00000042111	Ccdc115	-1.31454	4.08345e-05	4.87174	5.34904	3.11398	2.39439	14.9452	14.8818	8.09418	6.3248
ENSMUSG00000027353	Mcm8	-2.27885	4.15986e-05	0.157884	0.120638	0.033678	0.0459363	0.949381	0.895583	0.245036	0.253859
ENSMUSG00000007338	Mrpl49	-1.18983	4.16209e-05	7.83868	6.99884	5.07054	3.68164	37.5837	33.0378	24.891	20.3142
ENSMUSG00000039016	Timm8b	-1.15665	4.16211e-05	13.0535	13.4578	7.96676	8.1727	107.03	115.184	62.2793	78.6983
ENSMUSG00000067928	Zfp760	-2.43874	4.19141e-05	0.211713	0.173115	0.0528027	0.041697	0.394112	0.355848	0.129275	0.174369
ENSMUSG00000025155	Dus1l	-1.7281	4.2056e-05	1.2057	0.89999	0.484016	0.367278	13.2869	12.3928	4.20235	2.89114
ENSMUSG00000055214	Pld5	-1.12519	4.2192e-05	0.0951552	0.0874253	0.0618332	0.0511448	0.669624	0.607395	0.41701	0.400273
ENSMUSG00000031697	Orc6	-0.915081	4.2192e-05	8.52015	8.10071	5.75391	6.24441	39.7023	38.2478	25.1182	25.0482
ENSMUSG00000116845	Gm46546	-2.56056	4.25035e-05	10.2996	15.6669	3.14052	2.72423	179.306	210.812	154.278	175.168
ENSMUSG00000029404	Arl6ip4	-2.03723	4.2607e-05	1.9908	2.44932	0.772839	0.67576	26.1569	25.9355	9.2277	7.40118
ENSMUSG00000021639	Gtf2h2	-1.43506	4.29792e-05	0.365617	0.329724	0.192304	0.153014	2.39362	2.0723	0.852781	0.790223
ENSMUSG00000050377	Il31ra	1.96046	4.2988e-05	0.0148723	0.0277354	0.118582	0.104761	0.763967	1.2897	21.0568	26.7087
ENSMUSG00000020808	Pimreg	-1.83232	4.2998e-05	1.22271	1.06377	0.488225	0.368453	5.82971	5.90984	3.66168	2.79516
ENSMUSG00000084159	Gm12696	-1.12751	4.31639e-05	27.4364	25.166	17.0655	15.5155	256.33	232.96	153.986	116.179
ENSMUSG00000042476	Abcb4	-1.51749	4.32557e-05	0.170815	0.160245	0.0920069	0.0621233	1.26866	1.05604	0.549555	0.326147
ENSMUSG00000081021	Gm11964	-2.00045	4.34341e-05	12.0773	10.5951	4.32971	3.20834	153.854	147.814	104.133	70.889
ENSMUSG00000027963	Extl2	-4.04318	4.36478e-05	0.0838222	0.0825024	0.00906928	0.00314685	0.2055	0.218232	0.0544157	0.0534964
ENSMUSG00000076236	Mir682	-0.994191	4.37182e-05	401.325	384.846	263.039	273.454	5571.79	6185.03	6425.96	6851.18
ENSMUSG00000028447	Dctn3	-1.88189	4.40512e-05	0.786616	0.726269	0.338554	0.202536	13.6022	12.4288	4.55296	3.73477
ENSMUSG00000059895	Ptp4a3	1.43171	4.41315e-05	0.129263	0.151385	0.587227	0.430362	1.09137	1.29643	3.65416	2.61074
ENSMUSG00000109511	Nup62	-1.12235	4.4902e-05	2.86186	3.21029	2.18178	1.56627	6.75288	7.62055	5.33496	4.02164
ENSMUSG00000115938	Gm17241	-2.35949	4.52737e-05	16.8845	15.0251	2.71524	6.19115	140.858	142.966	63.4849	92.598
ENSMUSG00000028953	Abcf2	-1.31568	4.52781e-05	1.62507	1.48591	0.991758	0.682643	16.419	15.479	8.89088	5.33804
ENSMUSG00000046010	Zfp830	-1.41746	4.57559e-05	9.37854	9.59145	5.7957	3.66667	19.3432	20.5531	11.0385	8.22869
ENSMUSG00000073233	Nfyc-ps	-1.65128	4.61473e-05	7.45924	9.1061	4.16983	2.82639	33.0751	38.5302	17.6491	9.62319
ENSMUSG00000029761	Cald1	1.60485	4.64633e-05	0.0158087	0.0155598	0.0697781	0.0590276	0.133386	0.143928	0.450152	0.401694
ENSMUSG00000047909	Ankrd16	-2.75159	4.65281e-05	0.229326	0.225715	0.0549414	0.0326803	0.613095	0.617261	0.206684	0.196082
ENSMUSG00000022033	Pbk	-1.47639	4.6805e-05	0.923942	0.962043	0.535527	0.36786	4.35712	4.29808	2.44929	2.17886
ENSMUSG00000033126	Ybey	-3.45879	4.70723e-05	0.225868	0.252354	0.044363	0.00710446	0.555513	0.618867	0.180864	0.241552
ENSMUSG00000041057	Wdr43	-1.13533	4.7345e-05	1.12149	1.21953	0.849752	0.581829	4.04005	4.25173	2.95185	2.21252
ENSMUSG00000025917	Cops5	-1.19227	4.77975e-05	1.6539	1.33189	0.890938	0.884914	13.4847	12.7142	7.07227	7.2193
ENSMUSG00000107383	Gm4366	-1.09367	4.80414e-05	77.7873	74.2113	57.105	38.8703	738.002	723.346	664.21	379.604
ENSMUSG00000032388	Spg21	-1.83094	4.80414e-05	0.311294	0.293887	0.151526	0.0714711	3.22306	2.96388	1.26785	1.11396
ENSMUSG00000037525	Bcdin3d	-2.35938	4.82815e-05	0.964754	0.776915	0.29417	0.145816	1.95457	1.56616	0.700406	0.510355
ENSMUSG00000001847	Rac1	-1.04447	4.8527e-05	1.08676	1.13077	0.710326	0.750524	8.26893	8.38792	4.45022	4.01669
ENSMUSG00000095315	Gm10130	-1.77967	4.96593e-05	0.594757	0.504394	0.278111	0.14366	1.25684	1.23337	1.09153	1.04044
ENSMUSG00000117939	Gm9067	-1.68931	5.05792e-05	4.86086	5.95866	2.51968	1.95426	59.3909	60.3695	24.3075	16.8169
ENSMUSG00000020526	Znhit3	-1.02537	5.0605e-05	8.78005	7.36036	5.50968	5.25938	27.6098	24.7287	15.5606	15.8658
ENSMUSG00000058589	Anks1b	1.6713	5.06527e-05	0.00270287	0.00198219	0.0109914	0.00919008	0.0141503	0.0151794	0.0556976	0.0835126
ENSMUSG00000083668	Gm5648	-2.19841	5.09773e-05	2.20364	2.81962	0.780182	0.683891	22.4771	25.8827	11.5385	6.62519
ENSMUSG00000095990	Zfp97	-1.96281	5.13773e-05	0.22244	0.180567	0.076916	0.0613829	0.433414	0.300193	0.156396	0.197493
ENSMUSG00000074141	Il4i1	-1.11461	5.1588e-05	1.79706	2.00131	1.3768	0.980436	4.24563	4.74958	3.38063	2.53303
ENSMUSG00000044155	Lsm8	-0.936199	5.24696e-05	7.48384	7.40599	4.90583	5.70243	33.3644	34.5586	18.3651	21.7222
ENSMUSG00000016554	Eif3d	-1.19399	5.26284e-05	4.10904	3.69477	2.78234	1.80261	30.3615	31.7672	17.7309	11.9581
ENSMUSG00000003421	Nosip	-1.85897	5.29291e-05	0.313923	0.356235	0.121809	0.128945	3.25371	3.74047	1.19125	1.10462
ENSMUSG00000043702	Pde12	-1.58987	5.3613e-05	0.804474	1.11546	0.498952	0.34853	1.71464	2.17313	0.988056	0.902077
ENSMUSG00000026098	Pms1	-1.66531	5.3936e-05	0.0632417	0.0665021	0.0302163	0.0245336	0.248643	0.216531	0.102433	0.125813
ENSMUSG00000081917	Gm15209	-2.51229	5.3936e-05	9.4715	7.60131	2.52517	1.35667	28.9974	26.9632	6.27221	4.57876
ENSMUSG00000073568	Arl14epl	-1.55611	5.40397e-05	0.57263	0.808461	0.317485	0.316825	2.63785	3.76974	1.3539	1.43664
ENSMUSG00000078521	Aunip	-1.39951	5.40397e-05	1.06393	0.878563	0.554431	0.435469	1.9295	1.94349	1.34323	1.33789
ENSMUSG00000034321	Exosc1	-1.06722	5.41587e-05	2.43994	2.39636	1.62446	1.49901	6.46112	6.03471	4.24409	4.14971
ENSMUSG00000001228	Uhrf1	-1.1107	5.43333e-05	1.20815	1.32568	0.857955	0.723207	7.78074	8.92132	5.97821	4.73953
ENSMUSG00000049751	Rpl36al	-1.06226	5.47249e-05	20.1611	19.3772	13.1247	12.5339	141.731	145.435	108.152	124.086
ENSMUSG00000025403	Shmt2	-1.65521	5.4742e-05	2.70513	2.65175	1.55506	0.688276	37.2475	38.7415	21.6607	12.9243
ENSMUSG00000002996	Hbp1	-1.24592	5.59568e-05	0.68411	0.595373	0.378403	0.35199	2.38118	2.10271	1.5324	1.38282
ENSMUSG00000047036	Zfp445	-1.50744	5.59568e-05	0.447771	0.483457	0.256379	0.180022	1.07465	1.21532	0.699353	0.552698
ENSMUSG00000082253	Gm14639	-2.34411	5.63229e-05	4.84596	3.64349	1.27924	0.939955	28.8739	22.7221	7.26154	5.95305
ENSMUSG00000020736	Nt5c	-2.25263	5.64517e-05	3.11021	3.14075	1.17416	0.517095	29.7692	29.1016	8.37717	7.47437
ENSMUSG00000054408	Spcs3	-1.82145	5.65483e-05	0.755539	0.533743	0.258865	0.234006	7.84786	5.88917	3.14725	2.29752
ENSMUSG00000044471	Lncpint	-1.02991	5.68074e-05	0.429358	0.415526	0.31396	0.244433	4.43853	4.25883	2.96715	2.78811
ENSMUSG00000080979	Gm13675	-1.49433	5.84792e-05	22.8076	25.3766	14.2281	8.46315	143.567	145.753	70.6476	61.1655
ENSMUSG00000019804	Snx3	-1.00938	5.88834e-05	1.0206	1.09742	0.743451	0.679311	10.5276	10.4513	6.02967	5.44059
ENSMUSG00000082415	Gm12486	-3.66512	5.90638e-05	4.8482	2.86312	0.602271	0.125385	14.6523	10.286	0.84318	0.376156
ENSMUSG00000081603	Gm14681	-0.872988	5.95321e-05	455.511	437.452	344.618	316.721	2725.13	2724.79	2331.86	2018.5
ENSMUSG00000026201	Stk16	-1.4005	5.99718e-05	2.57882	2.94721	1.6534	1.13791	20.0806	20.9072	13.0086	9.11747
ENSMUSG00000030084	Plxna1	1.60239	6.02227e-05	0.0616758	0.0507937	0.227272	0.237308	0.308379	0.281224	1.11173	0.956556
ENSMUSG00000047407	Tgif1	-0.919631	6.05175e-05	7.87381	8.0446	5.97806	5.4168	15.2298	15.4383	11.2132	10.5286
ENSMUSG00000015176	Nolc1	-1.11271	6.26687e-05	3.10482	3.32889	2.26813	1.73302	23.5002	24.5958	14.0772	9.40182
ENSMUSG00000021326	Trim27	-1.12748	6.34735e-05	1.51056	1.75334	1.10458	0.90563	4.08537	5.07981	3.01733	2.57483
ENSMUSG00000061904	Slc25a3	-0.970341	6.36225e-05	14.7312	13.6256	10.8421	8.73516	139.541	127.351	91.2721	71.1408
ENSMUSG00000027601	Mtfr1	-1.07807	6.36225e-05	0.725727	0.709161	0.472822	0.447618	4.69025	4.18645	2.38357	1.98694
ENSMUSG00000039684	Gm5422	-1.45012	6.37641e-05	4.74624	4.86141	2.94443	1.72896	69.052	68.7433	35.6567	18.4572
ENSMUSG00000030045	Mrpl19	-1.14536	6.3954e-05	4.32042	3.87739	2.88134	2.10829	18.0725	18.8775	13.4543	10.2654
ENSMUSG00000049091	Sephs2	-1.18192	6.40498e-05	8.27305	8.51171	5.38807	4.58039	36.4389	38.026	17.9004	14.8629
ENSMUSG00000031631	Cfap97	-1.81873	6.43947e-05	0.138333	0.120445	0.0535365	0.044892	0.320561	0.341697	0.202249	0.25542
ENSMUSG00000052102	Gnpda1	-1.46123	6.44556e-05	1.91594	2.18589	1.32672	0.650595	12.6086	12.265	5.841	3.40675
ENSMUSG00002075882	Gm54499	-3.14241	6.48729e-05	26.8423	30.1939	4.28722	4.46273	368.123	349.494	71.1679	34.8093
ENSMUSG00000030613	Ccdc90b	-1.54526	6.56128e-05	0.418968	0.363538	0.194148	0.166809	2.15272	1.92892	0.970738	0.821212
ENSMUSG00000036112	Metap2	-1.04066	6.59009e-05	0.668845	0.688035	0.448168	0.446307	5.8792	5.4909	3.33636	3.08901
ENSMUSG00000029507	Pus1	-1.84859	6.74269e-05	1.33359	1.26337	0.670947	0.271605	5.25934	4.96323	2.35763	1.64903
ENSMUSG00000031352	Hccs	-1.7373	6.79589e-05	0.0980018	0.0801098	0.032035	0.0415622	0.266598	0.243599	0.0974979	0.132419
ENSMUSG00000089695	Gm15946	-1.54091	6.84132e-05	17.913	18.8516	8.85823	8.1785	126.907	127.078	64.2414	69.2767
ENSMUSG00000007039	Ddah2	-1.80783	6.84132e-05	1.67566	2.13656	0.808984	0.642656	18.318	19.304	9.12236	6.07199
ENSMUSG00000049252	Lrp1b	-0.972614	6.84132e-05	0.0549907	0.050641	0.0405074	0.0322957	0.471584	0.429738	0.352077	0.315245
ENSMUSG00000090744	Gm6871	-1.89245	6.84132e-05	0.399834	0.268508	0.166471	0.0702837	0.812162	0.598506	0.484279	0.412008
ENSMUSG00000091594	Gm17067	-1.98785	6.84132e-05	0.101203	0.102163	0.0369906	0.0317099	0.310095	0.321814	0.233548	0.262739
ENSMUSG00000008859	Rala	-1.37926	6.89149e-05	0.184922	0.167594	0.0992803	0.0831018	1.4272	1.45698	0.626899	0.631787
ENSMUSG00000040824	Snrpd2	-1.4391	6.91472e-05	2.89829	2.29714	1.26204	1.34921	47.532	47.5192	31.679	36.4465
ENSMUSG00000014177	Tvp23b	-1.43799	6.92584e-05	0.248285	0.239765	0.113481	0.132665	1.07903	0.805365	0.412022	0.390725
ENSMUSG00000096696	Zfp960	-2.00461	7.08564e-05	0.194165	0.159631	0.0587401	0.0611447	0.315233	0.274296	0.111095	0.122289
ENSMUSG00000024309	Pfdn6	-1.22197	7.21758e-05	12.7059	10.6224	7.27392	6.23551	80.8658	75.2231	41.6325	32.781
ENSMUSG00000120554	ENSMUSG00000120554	-3.58365	7.21758e-05	1.47794	1.50012	0.206548	0.107501	4.38763	4.31854	0.542187	0.806261
ENSMUSG00000058073	Gm11189	-2.51922	7.28707e-05	7.14977	8.72	1.91153	1.80889	34.6608	36.4098	11.5561	7.77823
ENSMUSG00000026035	Ppil3	-1.46455	7.29273e-05	0.587165	0.589795	0.276526	0.304228	3.51495	3.87127	1.71536	2.153
ENSMUSG00000040296	Rigi	-0.983903	7.3007e-05	0.911732	0.994432	0.658779	0.647179	10.9893	12.6476	14.2934	20.7925
ENSMUSG00000025956	Mettl21a	-2.61443	7.34432e-05	0.303066	0.229048	0.0514307	0.0692821	0.920023	0.649856	0.172444	0.258233
ENSMUSG00000079139	Gm4204	-1.0415	7.34432e-05	26.8467	25.5851	18.4486	15.9803	301.374	315.922	280.806	230.942
ENSMUSG00000113308	Gm48445	-1.80523	7.46611e-05	35.0321	33.5888	16.3759	9.48965	115.062	115.331	56.7246	35.4983
ENSMUSG00000073155	1810058I24Rik	-0.935283	7.46611e-05	3.92947	4.32789	2.89379	2.96533	24.5928	25.9515	15.6649	17.6418
ENSMUSG00000044751	Atp5pb-ps	-1.15444	7.51115e-05	34.3847	27.2397	17.6276	20.2036	355.588	336.781	256.162	227.51
ENSMUSG00000038374	Rbm8a	-1.12222	7.51115e-05	7.37073	5.91672	4.30611	3.97262	48.7254	46.0553	28.9691	30.6033
ENSMUSG00000052681	Rap1b	-0.964867	7.54505e-05	1.138	1.129	0.770887	0.807717	5.21341	4.92799	2.40687	2.47798
ENSMUSG00000029430	Ran	-0.927852	7.54614e-05	21.6022	20.0351	15.8128	13.8377	178.995	161.508	122.697	108.709
ENSMUSG00000032571	Pik3r4	-2.6031	7.55291e-05	0.079576	0.0641992	0.0211482	0.00910923	0.326131	0.332552	0.13637	0.138157
ENSMUSG00000019362	D8Ertd738e	-1.00862	7.71336e-05	8.55377	9.72067	6.30697	5.98072	74.3726	79.9072	49.5949	52.6576
ENSMUSG00000106803	Gm8930	-1.66136	7.865e-05	8.50007	8.06743	3.35162	3.79797	15.5582	15.1638	6.10929	5.65279
ENSMUSG00000029030	Tprgl	-1.9842	7.91814e-05	1.31886	1.51444	0.511987	0.447675	14.8555	14.3872	5.98001	5.15892
ENSMUSG00000094942	Gm3604	-1.88943	7.92043e-05	0.470999	0.312919	0.160172	0.123334	0.828174	0.571753	0.337897	0.438519
ENSMUSG00000079316	Rab9	-0.976099	7.94872e-05	1.72165	1.57278	1.10363	1.1758	3.56444	3.41445	2.27064	2.3246
ENSMUSG00000042251	Pm20d1	3.12163	8.15579e-05	0.00967686	0.0166679	0.187981	0.11825	0.120961	0.1262	0.599104	0.430769
ENSMUSG00000001016	Ilf2	-1.01774	8.15579e-05	2.70645	2.5187	1.81341	1.68283	19.535	19.2789	11.7632	9.91429
ENSMUSG00000030512	Snrpa1	-1.20539	8.19314e-05	1.69417	1.52025	1.10178	0.770389	16.9866	15.2614	8.63441	6.90739
ENSMUSG00000082998	Gm11221	-1.06579	8.20221e-05	37.393	36.9964	23.1409	25.2245	276.005	268.584	167.608	182.139
ENSMUSG00000063200	Nol7	-1.6163	8.26732e-05	1.02409	1.00797	0.550033	0.327171	11.1111	10.9229	6.80619	5.95139
ENSMUSG00000030751	Psma1	-0.999898	8.29107e-05	6.25236	5.56094	4.43476	3.55281	56.5953	53.7857	32.7697	32.7766
ENSMUSG00000062198	2700097O09Rik	-1.15539	8.31334e-05	0.5854	0.694416	0.429394	0.342613	3.78141	3.80014	1.56719	1.67762
ENSMUSG00000019979	Apaf1	1.51779	8.34322e-05	0.0380425	0.0448095	0.190352	0.127741	0.137826	0.147933	0.507255	0.460884
ENSMUSG00000115219	Eef1akmt4	-1.67752	8.34322e-05	0.911335	0.912451	0.307427	0.48459	4.44669	4.71691	1.81821	2.13951
ENSMUSG00000058550	Dppa4	-1.13018	8.34322e-05	1.94195	1.84584	1.23446	1.10419	13.5104	12.768	9.16539	7.27732
ENSMUSG00000037251	Pomk	-1.67789	8.34322e-05	0.542798	0.47913	0.245636	0.180488	1.06836	1.00914	0.606865	0.561518
ENSMUSG00000114003	Gm9616	-0.984662	8.47989e-05	44.1811	41.3552	28.1189	30.7465	534.054	532.255	533.55	503.149
ENSMUSG00000121438	ENSMUSG00000121438	-1.44169	8.56007e-05	0.324897	0.317758	0.170128	0.148374	0.686808	0.653731	0.442562	0.581532
ENSMUSG00000024442	Dele1	-2.36639	8.56605e-05	0.222305	0.199943	0.0535656	0.0579887	2.00841	1.81835	0.649215	0.379157
ENSMUSG00000034203	Chchd4	-0.97453	8.5733e-05	7.85006	7.34316	5.83484	4.61565	24.6416	23.5778	17.1608	13.8768
ENSMUSG00000099998	Gm6501	-1.61643	8.58518e-05	8.33569	9.64491	4.73092	3.03621	44.0964	45.3436	23.4056	12.7373
ENSMUSG00000071291	Zfp58	-1.91756	8.6239e-05	0.538596	0.436241	0.19445	0.150175	0.953764	0.789651	0.545714	0.496231
ENSMUSG00000028194	Ddah1	-0.911764	8.6239e-05	0.346443	0.380332	0.253257	0.271628	4.977	5.74391	6.01088	6.60611
ENSMUSG00000020949	Fkbp3	-0.966079	8.65197e-05	3.59257	3.31314	2.42178	2.37745	78.7195	70.621	57.0313	61.0817
ENSMUSG00000035601	Trmt10b	-1.75369	8.77082e-05	0.300555	0.289785	0.10801	0.132062	1.95667	1.53647	0.6412	0.556802
ENSMUSG00000112068	Gm9182	-1.91107	8.84438e-05	9.48633	7.00272	3.31438	2.54773	19.2463	16.4295	6.88371	4.24622
ENSMUSG00000116564	Riok2	-1.01529	8.84438e-05	1.82578	1.71623	1.27224	1.09701	6.08876	5.58054	3.53663	2.95501
ENSMUSG00000031585	Gtf2e2	-0.923287	8.87248e-05	1.27008	1.20706	0.911208	0.860242	8.06656	7.45115	4.68467	4.17554
ENSMUSG00000028902	Sf3a3	-1.2757	8.90006e-05	1.20626	1.25863	0.834608	0.525484	10.006	9.56302	4.95975	3.7551
ENSMUSG00000003033	Ap1m1	-1.78078	8.90006e-05	0.325527	0.39307	0.166967	0.109358	7.38645	7.51788	2.38443	1.63256
ENSMUSG00000110569	Gm18860	-1.55085	8.92809e-05	11.9014	10.6627	6.01333	4.26179	27.3121	23.9536	14.9267	7.36934
ENSMUSG00000026111	Unc50	-1.61015	8.96361e-05	1.4724	1.01509	0.685307	0.400086	4.86475	3.556	1.82748	1.45692
ENSMUSG00000020491	2810021J22Rik	-3.98257	8.99999e-05	0.126922	0.0856618	0.0121631	0.00422033	0.228459	0.203447	0.044598	0.101288
ENSMUSG00000038776	Ephx1	1.83739	9.12549e-05	0.0417308	0.0333724	0.201205	0.160876	0.289507	0.242592	1.06289	0.846874
ENSMUSG00000036299	BC031181	-1.22681	9.12549e-05	5.11449	3.92274	2.84387	2.37457	26.9599	22.3717	12.9571	11.4137
ENSMUSG00000034931	Dhx8	-1.69744	9.14213e-05	0.206473	0.244865	0.116367	0.0669668	1.05267	1.06608	0.511828	0.431345
ENSMUSG00000041225	Arhgap12	-1.15509	9.14881e-05	0.235395	0.244018	0.168645	0.120272	1.93588	1.76977	0.955265	0.635377
ENSMUSG00000022295	Atp6v1c1	-1.07146	9.18573e-05	0.905409	0.926874	0.64602	0.52908	6.2137	5.94102	3.04003	2.7321
ENSMUSG00000083912	Gm5391	-1.17944	9.25288e-05	29.0005	30.8835	19.7198	15.8241	278.975	276.173	200.441	170.524
ENSMUSG00002076377	Gm56125	-0.856161	9.37005e-05	1853.93	1747.37	1409.43	1289.46	25108	25714.7	21696.6	22915.3
ENSMUSG00000040771	Oard1	-1.16152	9.39776e-05	3.07784	3.09266	2.11589	1.58992	27.9658	25.3582	15.6109	12.551
ENSMUSG00000103953	Gm29718	-2.84132	9.4355e-05	5.3765	4.6905	0.819695	1.13767	55.9645	64.2238	16.1207	7.11042
ENSMUSG00000055762	Eef1d	-1.08469	9.45502e-05	1.68192	1.82359	1.23098	0.994172	25.2098	24.9137	16.7626	13.6091
ENSMUSG00000002147	Stat6	-1.78504	9.52932e-05	0.372964	0.316018	0.159542	0.105683	1.95563	2.03656	0.683494	0.619001
ENSMUSG00000032469	Dbr1	-1.08548	9.63308e-05	2.21009	2.31372	1.40769	1.4887	4.60771	4.9043	2.67312	2.55652
ENSMUSG00000067106	Gm5529	-1.78564	9.6556e-05	7.32666	5.92356	2.92551	2.20782	81.6399	63.9358	32.6195	21.3169
ENSMUSG00000016559	H3f3b	-0.951705	9.81661e-05	56.9376	51.4239	42.9592	32.8461	216.211	192.546	128.603	101.139
ENSMUSG00000118088	Gm3815	-1.57645	9.88917e-05	16.8356	17.7134	9.41139	5.94556	110.999	99.3091	41.8645	28.5117
ENSMUSG00000043801	Oaz1-ps	-1.26959	9.89482e-05	58.7967	52.0084	39.2897	22.2811	827.834	751.736	683.242	422.449
ENSMUSG00000040018	Cox15	-2.1317	9.89892e-05	0.171196	0.214983	0.0577506	0.0618323	1.08916	1.22889	0.364654	0.305726
ENSMUSG00000003549	Ercc1	-1.68754	0.000100269	0.66488	0.610458	0.327299	0.196334	5.89957	5.24017	2.01649	1.69771
ENSMUSG00000034813	Grip1	1.30409	0.000100449	0.00956971	0.00923789	0.0354927	0.0270934	0.0283411	0.0332383	0.115788	0.134932
ENSMUSG00000051124	Gimap9	-4.92787	0.000100449	0.390396	0.614799	0.0218238	0.0227172	1.15167	0.883773	0.120031	0.136303
ENSMUSG00000091931	Gon7	-1.07199	0.000101176	4.81321	4.66142	2.82735	3.32502	14.1179	15.3523	9.26623	12.7908
ENSMUSG00000037845	Fdxacb1	-1.5283	0.000101522	1.82394	1.60448	0.924021	0.663343	3.65927	3.44457	1.71422	1.49915
ENSMUSG00000114533	Gm8416	-1.43329	0.00010187	6.92689	6.72812	3.10798	3.81861	27.7532	25.7014	13.0433	10.0769
ENSMUSG00000020321	Mdh1	-1.12217	0.000102406	1.45009	1.27721	0.902078	0.79188	25.4658	23.3631	15.4933	14.2971
ENSMUSG00000022009	Nufip1	-1.07788	0.000102746	1.20141	1.17817	0.857347	0.66069	3.87709	3.94815	2.53514	2.2484
ENSMUSG00000041841	Rpl37	-1.33519	0.000102746	4.4602	4.06819	2.32362	2.25568	36.9192	38.3375	29.2672	34.1885
ENSMUSG00000028601	Echdc2	-1.61067	0.000103297	0.516811	0.492131	0.246626	0.195598	7.15132	7.53084	3.81449	3.33495
ENSMUSG00000023942	Slc29a1	-1.38074	0.000103625	1.07615	0.82427	0.569923	0.409628	14.0588	9.52888	6.37093	3.85615
ENSMUSG00000022962	Gart	-1.20251	0.00010382	1.0134	0.932874	0.676518	0.458067	14.2848	14.1846	7.32031	4.88605
ENSMUSG00000020948	Klhl28	-2.29082	0.000105482	0.111325	0.163284	0.0280655	0.0508078	0.187724	0.232035	0.1025	0.190529
ENSMUSG00000023048	Prr13	-1.34497	0.000106311	2.59118	2.67183	1.36229	1.45396	7.52677	8.72899	3.69026	3.62592
ENSMUSG00000115293	Eef1ece2	-1.59097	0.000106586	0.215743	0.20733	0.07787	0.116644	1.06852	1.10854	0.501407	0.636599
ENSMUSG00000049038	Mterf2	-1.83928	0.000106792	0.542512	0.600716	0.212291	0.220982	1.36306	1.41502	0.602755	0.726082
ENSMUSG00000017677	Wsb1	-0.916476	0.000106792	3.04383	3.25463	2.30849	2.21235	8.00006	8.32779	5.48372	5.2848
ENSMUSG00000043155	Hpdl	-3.26338	0.000106792	1.42161	0.985821	0.234799	0.0752034	3.81251	3.62528	0.559905	0.789635
ENSMUSG00000030225	Dera	-1.75951	0.000106792	0.0759798	0.0507858	0.0278933	0.0224363	0.950882	0.78411	0.388922	0.356341
ENSMUSG00000076432	Ywhaq	-0.971148	0.000106931	1.67456	1.75225	1.28478	1.07531	13.4113	13.2376	9.77947	8.43273
ENSMUSG00000066613	Zfp932	-1.73295	0.000106931	0.394421	0.41712	0.145428	0.190447	1.05319	1.22245	0.548873	0.669007
ENSMUSG00000063171	Rps4l	-0.986117	0.000108004	80.5695	74.5273	60.4029	45.3579	657.139	658.146	414.76	327.624
ENSMUSG00000050071	Bex1	-0.914663	0.000108004	33.2254	32.7022	24.2787	23.139	337.508	339.932	258.17	239.705
ENSMUSG00000032555	Topbp1	-1.22139	0.000108177	0.391892	0.452969	0.28249	0.202537	1.37549	1.59364	1.02114	0.876161
ENSMUSG00000114922	Ppifos	-2.69534	0.000108819	0.71691	0.705622	0.211724	0.0629691	21.7237	22.9926	8.61265	5.96632
ENSMUSG00000052962	Mrpl35	-0.945452	0.000110018	2.98251	2.74258	1.92844	2.12146	20.1476	19.2925	12.3215	14.8794
ENSMUSG00000030541	Idh2	-1.3968	0.00011088	0.64961	0.636589	0.399615	0.250905	12.4249	12.0645	6.27332	4.11352
ENSMUSG00000035337	Uchl4	-1.26511	0.000112522	10.1324	10.0222	5.41179	6.01277	129.313	111.232	65.8948	72.4452
ENSMUSG00000029387	Gtf2h3	-1.46937	0.000113423	0.455827	0.414614	0.202094	0.226831	5.37248	5.11461	2.20195	1.67196
ENSMUSG00000116590	Gm53028	-1.20631	0.000113864	1.31282	1.14438	0.889059	0.540441	17.2832	15.6639	14.3772	9.08794
ENSMUSG00000020549	Elac2	-2.14527	0.000115182	0.207514	0.146958	0.0622459	0.0441777	1.99163	1.91544	0.83749	0.559585
ENSMUSG00000091512	Lamtor3	-1.28795	0.000115182	1.3345	1.16448	0.752274	0.626456	6.0501	5.33672	2.72386	2.23827
ENSMUSG00000052833	Sae1	-1.10699	0.000115182	0.759058	0.866813	0.611414	0.401542	9.14234	9.01876	5.29249	3.09488
ENSMUSG00000021519	Mterf3	-1.07967	0.000116269	0.718508	0.762101	0.467769	0.483022	1.7985	1.82509	1.10269	1.12445
ENSMUSG00000021832	Psmc6	-0.977334	0.000116427	2.45224	2.0248	1.55897	1.53254	23.8962	21.0718	12.0448	11.9708
ENSMUSG00000026019	Wdr12	-1.35935	0.000116723	0.571532	0.45917	0.321753	0.216232	3.0475	2.74309	1.30959	1.13522
ENSMUSG00000022752	Tomm70a	-1.06687	0.000117502	0.737673	0.834229	0.556654	0.453476	5.26362	5.5659	2.53939	2.48443
ENSMUSG00000048076	Arf1	-0.991422	0.000118692	2.16771	2.47386	1.70461	1.44446	20.6434	20.645	12.4947	8.67885
ENSMUSG00000095193	Gm20939	-1.16898	0.000119352	1.23662	1.17017	0.764059	0.681718	2.68152	2.56242	1.92106	1.91891
ENSMUSG00000026429	Ube2t	-0.993395	0.000119535	2.28662	2.35449	1.53672	1.63179	5.31199	5.14921	3.79825	3.80167
ENSMUSG00000030867	Plk1	-1.1839	0.000120177	1.53047	1.70978	1.05851	0.858075	6.8871	7.53184	4.11853	3.36729
ENSMUSG00000107951	Gm6210	-1.51544	0.000120351	4.17187	3.60399	1.81202	1.8862	8.28372	7.35568	3.0536	3.03888
ENSMUSG00000036291	Ap5m1	-1.66181	0.000120684	0.20093	0.244659	0.101901	0.0867867	0.859648	0.850189	0.354338	0.378486
ENSMUSG00000020448	Rnf185	-1.46701	0.000122263	0.289973	0.312213	0.179115	0.110004	0.84749	0.889335	0.603619	0.477306
ENSMUSG00000028345	Tex10	-1.07126	0.000123091	0.575994	0.537299	0.381645	0.334374	2.90596	2.81038	1.47151	1.34068
ENSMUSG00000078591	Hs3st4	2.45036	0.000125225	0.00182091	0.00124078	0.0127631	0.00978082	0.00644323	0.00772042	0.0503478	0.0647164
ENSMUSG00000019988	Nedd1	-2.09736	0.00012597	0.108295	0.102022	0.038053	0.0270073	0.55076	0.546656	0.147888	0.181849
ENSMUSG00000004221	Ikbkg	-1.87844	0.000126628	0.0731404	0.0824082	0.0247472	0.0336003	1.40507	1.47956	0.675167	0.646246
ENSMUSG00000058761	Rnf169	1.19755	0.000127607	0.162673	0.182031	0.62573	0.437235	0.366013	0.417433	1.36459	1.06266
ENSMUSG00000053931	Cnn3	-0.919921	0.000129152	2.60451	2.59606	2.03444	1.68134	15.4855	14.7659	9.2156	7.25159
ENSMUSG00000003623	Crot	-1.81582	0.000129152	0.18254	0.181499	0.0843415	0.0520262	1.24053	1.14399	0.547699	0.535436
ENSMUSG00000038683	Pak1ip1	-1.03903	0.000130971	3.01321	2.79834	2.12456	1.69117	15.6055	14.9771	9.04431	7.78843
ENSMUSG00000028637	Ccdc30	-1.67507	0.00013129	0.0995906	0.0967895	0.0546223	0.0262423	1.45565	1.4352	0.870455	0.540883
ENSMUSG00000023984	Gm20517	-1.27241	0.000131503	0.232264	0.207969	0.142913	0.101366	0.745987	0.722334	0.568948	0.582853
ENSMUSG00000066009	Zfp987	-1.2971	0.000131503	0.510829	0.469527	0.312229	0.222071	0.717546	0.737549	0.534455	0.374745
ENSMUSG00000028066	Pmf1	-1.49484	0.000133553	0.486048	0.609511	0.299886	0.217885	7.89558	7.49131	5.04573	4.32418
ENSMUSG00000027852	Nras	-1.09221	0.000134393	2.69944	2.9131	2.00979	1.52854	20.4516	20.0462	11.4023	8.65704
ENSMUSG00000079033	Mef2b	-1.53285	0.000134567	0.253893	0.268482	0.1302	0.112331	1.64296	1.72242	0.868001	0.9597
ENSMUSG00000049717	Lig4	-1.72376	0.00013605	0.654522	0.630933	0.230094	0.306263	1.03914	1.12904	0.479049	0.588968
ENSMUSG00000019312	Grb7	-1.96217	0.000136924	0.447856	0.562185	0.199561	0.143523	2.46645	2.68316	0.838157	0.687399
ENSMUSG00000042705	Commd10	-0.870602	0.000137719	0.326905	0.305722	0.242832	0.226547	2.43602	2.4162	2.04142	1.97909
ENSMUSG00000021218	Gdi2	-0.996662	0.000137833	1.28856	1.46457	1.02638	0.83287	15.1459	16.3797	10.3709	9.26853
ENSMUSG00000083906	Gm15186	-2.61247	0.000137833	4.24464	5.80817	1.38897	0.722914	23.5008	26.4934	3.93541	3.73506
ENSMUSG00000035297	Cops4	-1.05268	0.000139077	1.09083	1.01725	0.763342	0.607155	10.0309	8.91014	5.51352	4.44327
ENSMUSG00002075524	Gm55094	3.0903	0.00013987	100.211	310.997	2319.1	2386.07	188.152	471.025	2797.55	3053.69
ENSMUSG00000021114	Atp6v1d	-1.21532	0.000140565	1.01724	0.768058	0.56865	0.4703	6.4267	5.91953	3.02865	2.58178
ENSMUSG00000021474	Sfxn1	-1.23446	0.000140565	0.45224	0.468712	0.306408	0.217594	3.67704	3.59713	2.22258	1.56407
ENSMUSG00000027944	Hax1	-1.48413	0.000140861	2.74391	2.35666	1.3678	1.07801	16.0265	14.1056	6.39934	5.77652
ENSMUSG00000058186	Zfp980	-1.14985	0.000140861	0.536985	0.470748	0.319487	0.295391	1.03771	0.861622	0.721983	0.671161
ENSMUSG00000022221	Ripk3	-2.16916	0.00014184	1.43043	1.1856	0.555534	0.192758	10.8713	9.76641	2.9881	1.69978
ENSMUSG00000027751	Supt20	-1.56017	0.000142617	0.209091	0.215371	0.112355	0.079227	2.05039	1.97663	0.863501	0.709271
ENSMUSG00000117046	Gm19183	-1.49153	0.000144067	8.45772	10.3896	5.05786	3.89146	34.6832	36.912	17.4093	12.59
ENSMUSG00000032294	Pkm	-1.05901	0.000146819	3.15649	3.78001	2.67653	1.79549	71.7532	74.2064	61.1411	42.8529
ENSMUSG00000005103	Wdr1	-1.09545	0.000147088	0.523485	0.537302	0.35528	0.314863	2.92159	3.20018	1.78177	1.36565
ENSMUSG00000022130	Tgds	-1.20667	0.000148362	0.718616	0.723813	0.465805	0.374231	2.16703	2.21272	1.19108	0.989271
ENSMUSG00000021079	Timm9	-1.21434	0.000149097	0.871359	1.04445	0.547389	0.572307	3.09721	3.62161	2.08345	2.03822
ENSMUSG00000091537	Tma7	-1.55833	0.000149097	0.806704	0.865533	0.394082	0.372153	9.3098	9.8213	5.74873	6.80872
ENSMUSG00000028478	Clta	-1.06781	0.000150349	0.780023	0.893004	0.582923	0.492118	7.21111	7.50163	4.04374	3.46871
ENSMUSG00000026726	Cubn	2.83123	0.000154563	0.002164	0.0013312	0.0154238	0.0185736	0.0143365	0.0162407	0.073641	0.104516
ENSMUSG00000078182	Gm6083	-0.862058	0.000157752	234.614	219.993	154.609	186.779	4589.75	4506.07	4128.99	4486.51
ENSMUSG00000084235	Gm15421	-0.896481	0.000158393	46.1748	50.7251	33.1824	37.6608	433.551	503.091	454.08	529.159
ENSMUSG00000070729	Gm12966	-1.19288	0.00015851	43.9665	41.2911	31.1348	18.8426	203.498	193.919	128.2	75.7055
ENSMUSG00000032497	Lrrfip2	-1.76364	0.00015851	0.0539302	0.0435265	0.0189931	0.0200845	0.286909	0.286638	0.100091	0.138081
ENSMUSG00000089814	Gm15310	-0.962046	0.000159486	76.6181	81.7346	54.8303	55.4338	1189.07	1131.33	1074.62	1072.39
ENSMUSG00000060427	Zfp868	-1.06004	0.000159742	1.32108	1.35104	0.873785	0.863385	2.19783	2.32722	1.71652	1.75447
ENSMUSG00000027854	Sike1	-1.35168	0.000161309	0.722178	0.719804	0.365382	0.404277	3.12639	3.40557	1.44364	1.37773
ENSMUSG00000067547	Gm7666	-1.34905	0.00016139	26.332	22.9053	16.5898	9.19354	342.387	283.13	236.554	156.953
ENSMUSG00000029012	Orc5	-0.856934	0.000161465	0.94523	0.964439	0.710306	0.72135	7.44153	8.2852	7.39911	8.38357
ENSMUSG00000074887	EU599041	-1.27631	0.000161695	0.434005	0.416545	0.252272	0.221136	1.54169	1.47066	1.03564	0.854389
ENSMUSG00000033739	Fkbpl	-1.83671	0.000171839	3.32317	2.82983	1.23151	1.08638	6.01158	5.88017	2.42128	2.5204
ENSMUSG00000022898	Vps26c	-1.25449	0.000172677	0.393283	0.379191	0.217608	0.221846	2.08079	2.20997	1.03083	0.96211
ENSMUSG00000078134	Srsf3-ps	-1.35578	0.000173024	8.58065	7.57035	4.74701	3.72541	28.8096	25.4679	16.7264	14.1772
ENSMUSG00000047466	8030462N17Rik	-1.02756	0.000173024	0.310414	0.334558	0.231237	0.195342	0.655942	0.707825	0.57829	0.627709
ENSMUSG00000034789	Rab24	-1.81921	0.000174005	2.48589	1.97822	0.783527	0.9541	19.226	17.0491	4.62724	3.87795
ENSMUSG00000028565	Nfia	2.86745	0.000174005	0.00117872	0.000994423	0.0129902	0.00823076	0.00404132	0.00430916	0.0430182	0.0593791
ENSMUSG00000080747	Gm14016	-1.52049	0.000176194	20.1483	22.6641	12.7382	6.97875	336.045	334.885	290.497	144.46
ENSMUSG00000105053	Gm43064	-2.10583	0.000178136	0.148341	0.165736	0.066116	0.0279956	0.481108	0.509047	0.336183	0.305619
ENSMUSG00000029681	Bcl7b	-1.49173	0.000179222	0.626964	0.684718	0.374488	0.244886	1.89377	2.04148	1.31791	1.05951
ENSMUSG00000024404	Riok3	-1.43512	0.000179757	0.254329	0.322418	0.147861	0.139707	2.02446	2.51126	0.788213	0.864286
ENSMUSG00000032606	Nicn1	-2.35709	0.000180827	0.777789	0.595422	0.263025	0.0782264	5.82862	5.20758	1.44932	1.11752
ENSMUSG00000112808	Gm4739	-0.918037	0.000181842	96.5912	85.1916	68.4086	62.0467	593.267	562.084	385.95	333.809
ENSMUSG00000022940	Pigp	-0.931998	0.000182948	2.4375	2.53947	1.72879	1.81511	35.5109	33.7719	32.2516	32.4439
ENSMUSG00000081352	Gm12389	-2.91537	0.000184471	5.1593	4.94082	0.857444	0.973686	70.5569	56.9567	19.9551	17.6886
ENSMUSG00000039682	Lap3	-1.03882	0.000187291	1.95514	1.9303	1.46402	1.08151	21.4885	20.5235	10.5619	8.55731
ENSMUSG00000014606	Slc25a11	-1.4096	0.00018743	2.76877	3.40647	1.81567	1.28066	33.811	36.0911	15.7259	12.1869
ENSMUSG00000059734	Ndufs8	-1.16609	0.000188287	3.53114	3.51953	2.1572	2.09812	41.2711	39.6681	28.3851	29.0789
ENSMUSG00000002844	Adprh	-1.2848	0.000189459	1.61943	1.29631	0.878994	0.73511	12.8816	11.0319	6.7953	5.32564
ENSMUSG00000086316	Nbdy	-1.65204	0.000190166	0.279809	0.350513	0.131533	0.140618	2.64547	2.58504	1.40243	1.40988
ENSMUSG00000083937	Cct3-ps1	-1.57559	0.000190311	3.0471	3.41184	1.62524	1.26883	32.1483	35.6867	16.9556	10.8013
ENSMUSG00000062397	Zfp706	-0.850409	0.000191378	6.09057	6.0267	4.59016	4.53191	25.7127	24.9609	15.9261	14.3279
ENSMUSG00000006412	Pfdn2	-1.1273	0.000191832	1.28285	1.24154	0.839456	0.719029	8.54235	8.27693	5.50923	5.08813
ENSMUSG00002076664	Gm55891	-1.47995	0.000192679	86.0415	92.8822	46.547	39.5695	609.923	623.54	319.235	204.308
ENSMUSG00000028251	Tstd3	-2.58983	0.000192679	0.296441	0.250925	0.0762289	0.0413997	2.42489	2.52092	0.90149	0.827994
ENSMUSG00000031400	G6pdx	-2.23053	0.000193522	0.18037	0.183351	0.0661179	0.0344123	3.16978	3.09659	1.18186	0.942896
ENSMUSG00000038762	Abcf1	-1.37637	0.000194193	0.774567	0.895343	0.506	0.351143	9.86222	10.7929	5.74726	3.92546
ENSMUSG00000041134	Cyyr1	2.19936	0.000195281	0.00707222	0.00522065	0.0390407	0.0375523	0.0198906	0.0191424	0.118852	0.114715
ENSMUSG00000025580	Eif4a3	-1.1543	0.000195564	2.05769	1.70241	1.29754	0.97756	12.2616	10.9972	5.80696	5.21751
ENSMUSG00000026708	Cenpl	-1.13948	0.000196498	1.02288	0.906458	0.592157	0.597334	1.64899	1.63377	1.05408	1.07605
ENSMUSG00000005566	Trim28	-0.961825	0.000199061	2.22211	2.35246	1.81175	1.35361	21.3666	24.035	19.5016	16.7108
ENSMUSG00000023967	Mrps18a	-1.17491	0.00019952	1.04379	0.95374	0.678015	0.510879	5.27096	5.37359	3.24829	3.01608
ENSMUSG00000066057	Gm1976	-1.62512	0.000199807	0.0770569	0.0804402	0.0361142	0.0326105	0.374388	0.334784	0.355051	0.345128
ENSMUSG00000032952	Ap4b1	-2.21157	0.000201285	0.344889	0.380743	0.151112	0.0488166	1.09059	1.15599	0.651345	0.515287
ENSMUSG00000031729	Ist1	-1.02021	0.000201359	1.13724	1.22656	0.848141	0.723606	3.90328	4.25503	3.16976	2.24813
ENSMUSG00000029028	Lrrc47	-1.57722	0.000202366	0.679201	0.733011	0.366362	0.263485	1.98994	2.37496	1.22565	0.936064
ENSMUSG00000005687	Bcas2	-1.00565	0.000203167	5.65637	5.32292	4.16828	3.20565	58.7052	52.5801	36.3218	32.3906
ENSMUSG00000053012	Krcc1	-1.40056	0.00020329	0.649381	0.647565	0.365402	0.29335	2.11903	2.04782	1.14636	1.03418
ENSMUSG00000018209	Stk4	-1.27106	0.000203854	0.129976	0.149476	0.0860433	0.0692641	0.481597	0.547405	0.299431	0.328805
ENSMUSG00000121477	ENSMUSG00000121477	-3.031	0.000203854	0.264937	0.409774	0.0634731	0.0440477	0.46364	0.754357	0.248603	0.253274
ENSMUSG00000106917	Gm7832	-1.16139	0.000204415	25.5002	21.8391	16.3655	12.1021	198.305	193.423	110.3	80.0126
ENSMUSG00000022412	Mief1	-1.50563	0.000204909	0.421622	0.456481	0.249161	0.161224	1.09923	1.14417	0.68351	0.560781
ENSMUSG00002075410	Gm56007	-1.7716	0.000204909	64.5311	102.444	41.5044	22.6111	401.758	462.362	235.838	113.056
ENSMUSG00000034868	Myl12b	-0.947821	0.000205621	2.14331	2.00941	1.53208	1.3828	24.6169	22.7884	18.7391	16.4064
ENSMUSG00000027454	Gins1	-1.24258	0.000208341	0.535996	0.51204	0.337399	0.256855	2.28361	2.17451	1.4843	1.28166
ENSMUSG00000063801	Ap3s2	-1.4501	0.000209712	0.150457	0.19492	0.0855458	0.0853062	1.63188	1.81123	0.585881	0.592654
ENSMUSG00000113450	Zfp935	-2.22986	0.000210915	0.257325	0.207601	0.0660289	0.0687319	0.510431	0.502394	0.21931	0.373116
ENSMUSG00000048758	Rpl29	-1.11509	0.000212972	9.53523	10.3887	7.02496	5.32404	123.6	125.966	104.62	98.9759
ENSMUSG00000037070	Rbmxl1	-0.959451	0.000213888	12.3316	12.9751	9.75691	7.79244	42.8395	41.8963	29.4054	22.2561
ENSMUSG00000115143	Fkbp1a-ps1	-2.32674	0.000214857	11.0175	8.74518	3.27816	1.86128	132.388	126.805	57.7154	39.2938
ENSMUSG00000026097	Ormdl1	-1.37916	0.000216207	0.670412	0.659856	0.36984	0.31825	2.00683	1.77988	1.09719	1.08308
ENSMUSG00000022228	Zscan26	-1.4758	0.000216207	0.943599	0.779746	0.507741	0.317116	1.81151	1.68365	1.19319	0.91024
ENSMUSG00000032381	Ciao2a	-1.23576	0.000216837	1.04816	0.924772	0.593856	0.538491	7.45515	7.18906	4.45524	4.48926
ENSMUSG00000008892	Vdac3	-1.01331	0.00021888	1.30925	1.35718	0.916813	0.87127	11.9086	10.6039	7.05615	6.54871
ENSMUSG00000030942	Thumpd1	-1.10261	0.000219961	4.25961	4.44389	3.15779	2.28251	13.7186	14.146	10.3014	7.45383
ENSMUSG00000018678	Sp2	1.13693	0.000221286	0.23024	0.228552	0.647939	0.725993	0.564777	0.625612	1.42899	1.73597
ENSMUSG00000098332	Pigbos1	-2.19401	0.000222157	1.37054	0.899309	0.340513	0.3323	5.7106	5.65815	1.76641	1.97164
ENSMUSG00000062380	Tubb3	-1.14527	0.000223529	1.59032	1.59236	1.07666	0.858165	6.79052	6.5536	3.45455	2.7346
ENSMUSG00000025465	Echs1	-1.34466	0.000224594	1.00148	1.02301	0.623393	0.441009	14.9464	14.1463	9.52339	7.62945
ENSMUSG00000025260	Hsd17b10	-1.55108	0.000224746	3.49986	3.64349	2.09443	1.12272	69.7505	60.8573	39.9949	31.5929
ENSMUSG00000025930	Msc	-1.63641	0.000225051	2.22399	2.29734	1.09553	0.845676	4.95444	5.11483	2.33878	2.81892
ENSMUSG00000109821	Gm6593	-1.62311	0.000225051	7.13813	6.8741	3.9042	2.09178	33.7392	31.1862	14.2963	8.84524
ENSMUSG00000084113	Gm14277	-0.971312	0.000225794	85.4864	78.2441	58.1966	55.0204	584.643	607.468	348.456	389.477
ENSMUSG00000025871	4833439L19Rik	-1.10908	0.000225821	1.07406	1.18626	0.733333	0.682246	9.01882	9.44977	5.18833	3.78814
ENSMUSG00000028837	Psmb2	-0.939681	0.000226386	1.34793	1.20691	0.948493	0.856242	19.0291	17.2972	11.1768	11.6491
ENSMUSG00000029304	Spp1	-0.902732	0.00022792	48.6782	36.8597	32.3248	29.9208	385.85	285.169	252.129	223.451
ENSMUSG00000035772	Mrps2	-1.07382	0.000228532	6.32853	7.2056	4.73096	3.92227	17.2069	17.9127	10.54	10.1979
ENSMUSG00000101330	Gm10193	-1.3747	0.000231152	42.8946	40.4807	24.543	18.5	130.955	130.383	83.9256	63.7223
ENSMUSG00000041747	Utp15	-1.07412	0.000231152	1.19473	1.41677	0.907259	0.76222	3.69934	3.81819	2.24904	1.98931
ENSMUSG00000032113	Chek1	-1.05148	0.000231282	0.934636	1.04031	0.629426	0.664318	4.10236	4.10568	2.77018	2.56237
ENSMUSG00000024795	Kif20b	-0.998729	0.000231965	0.541537	0.558801	0.405875	0.336721	1.71196	1.70649	1.2341	1.06861
ENSMUSG00000028676	Srsf10	-0.872472	0.000232982	3.05795	3.14347	2.19489	2.41407	11.7256	11.8812	7.00571	7.13204
ENSMUSG00000002768	Mea1	-1.68721	0.000234197	1.40351	1.14232	0.550718	0.518292	22.5776	20.6282	9.91292	9.53343
ENSMUSG00000042354	Gnl3	-0.897132	0.000235239	15.543	13.5226	11.4379	9.71068	46.2039	42.1982	34.1732	31.0499
ENSMUSG00000001674	Ddx18	-1.37557	0.000238677	0.745305	0.7052	0.439656	0.3067	4.42654	4.54327	2.11771	1.51912
ENSMUSG00000076128	Mir686	-1.5271	0.000239885	75.3977	62.1053	36.4689	27.3823	685.531	616.316	375.45	258.265
ENSMUSG00000058748	Zfp958	-0.966626	0.000241015	1.53358	1.50607	1.05014	1.06133	2.70511	2.61881	2.15755	2.26178
ENSMUSG00000019851	Perp	1.33752	0.000241175	0.430353	0.342668	1.47858	1.15926	3.55887	2.93648	7.92272	5.7794
ENSMUSG00000022451	Twf1	-1.11295	0.00024144	2.53376	2.1527	1.70024	1.21588	7.82584	7.53444	5.39	3.78399
ENSMUSG00000031105	Slc25a14	-2.43659	0.00024427	0.0704555	0.0678707	0.0184359	0.0157014	0.281822	0.250826	0.182683	0.200629
ENSMUSG00000039145	Camk1d	1.07692	0.000244688	0.0264397	0.0242521	0.0790082	0.0655685	0.312708	0.548943	7.88705	11.3458
ENSMUSG00000000339	Rtca	-1.50981	0.000244804	0.348275	0.360676	0.179455	0.15508	3.63721	3.66638	1.28158	1.03269
ENSMUSG00000069972	Rps13-ps2	-0.929453	0.000244804	65.6202	69.7792	45.1701	51.6612	672.414	721.221	633.604	761.292
ENSMUSG00000032171	Pin1	-1.02798	0.000244804	2.52211	2.57346	1.94283	1.41846	20.5872	19.6137	13.9506	10.7859
ENSMUSG00000002731	Prkra	-2.97654	0.000245143	0.11903	0.10449	0.014387	0.0262079	1.12918	1.00374	0.401037	0.430558
ENSMUSG00000051255	Gm6563	-0.982822	0.0002459	52.5773	45.4053	35.0536	32.1485	528.627	484.595	359.287	353.634
ENSMUSG00000020407	Upp1	-1.10487	0.00024618	2.75817	2.63537	2.07565	1.29149	33.5529	31.2878	17.8622	16.0836
ENSMUSG00000101645	Gm28635	-0.90393	0.000246354	0.84154	0.787849	0.638021	0.540167	8.68171	8.28439	7.38318	6.60066
ENSMUSG00000047751	Utf1	-1.02002	0.000246354	31.9605	33.1905	25.1754	18.0343	184.896	184.454	116.698	89.5053
ENSMUSG00000079444	Gm21981	-0.985429	0.00024718	3.53478	3.52373	2.55867	2.25906	66.8059	68.237	58.6213	64.8008
ENSMUSG00000034820	Cpsf7	-1.41398	0.000248025	0.455605	0.438181	0.270699	0.175734	0.932037	1.0993	0.670927	0.505994
ENSMUSG00000015790	Surf1	-2.53758	0.000248025	0.814156	1.11094	0.310313	0.107672	9.71436	8.90576	1.56191	1.16286
ENSMUSG00000075486	Commd6	-1.18701	0.000248179	2.12541	1.64527	1.09512	1.16195	11.7389	10.1992	5.36142	5.53688
ENSMUSG00000032329	Hmg20a	-1.16949	0.000249167	0.235889	0.265866	0.176376	0.122108	1.20995	1.06346	0.741692	0.599284
ENSMUSG00000031819	Emc8	-1.10775	0.000250115	2.51672	2.59841	1.94253	1.24007	22.4477	21.3508	16.1225	13.0623
ENSMUSG00000117556	Gm18948	-2.15338	0.00025034	5.68168	5.30296	1.64283	1.71009	32.6207	25.165	9.19987	8.09441
ENSMUSG00000026750	Psmb7	-0.981884	0.00025056	0.490813	0.440099	0.318551	0.32191	5.93967	5.32417	3.43896	3.38368
ENSMUSG00000027702	Lrrc34	-1.04512	0.000251841	0.83467	0.833681	0.570128	0.523056	4.19311	3.69688	2.28051	2.06923
ENSMUSG00000033475	Tomm6	-0.983852	0.000252878	15.6345	15.619	11.3413	10.0133	296.185	302.527	259.821	287.191
ENSMUSG00000020116	Pno1	-0.973035	0.000254815	5.04808	4.76985	3.76001	2.99015	23.9523	23.3901	15.4526	13.2977
ENSMUSG00000014769	Psmb1	-0.933895	0.000255215	1.70161	1.52172	1.1976	1.08891	18.8144	17.6459	12.2909	11.9012
ENSMUSG00000031389	Arhgap4	-1.37524	0.000255215	0.293069	0.279027	0.160618	0.135983	3.67389	3.71031	1.53979	1.38213
ENSMUSG00000112909	Gm10120	-1.73574	0.0002562	13.8777	15.2661	4.74597	7.41037	193.308	210.351	138.272	141.937
ENSMUSG00000053192	Mllt11	-1.28337	0.0002562	0.800278	0.761274	0.454866	0.411049	2.32483	2.21342	1.29212	1.26957
ENSMUSG00000020803	Txndc17	-1.05791	0.000257137	7.08216	7.24947	4.71126	4.61564	77.6205	78.838	59.3724	66.9268
ENSMUSG00000040174	Alkbh3	-1.76477	0.000258162	0.165662	0.180118	0.0807626	0.053804	0.872617	0.845605	0.300437	0.224183
ENSMUSG00000091697	Eif3s6-ps2	-1.02507	0.000258789	18.5476	17.3883	12.7819	11.0748	153.668	159.877	124.987	105.006
ENSMUSG00000079138	Gm8818	-3.0612	0.000260496	2.28246	2.30131	0.591284	0.0647884	4.11956	3.78073	1.12033	0.38873
ENSMUSG00000097919	Gm27021	-1.00564	0.000262106	0.708745	0.736286	0.559955	0.408415	5.23449	5.11917	3.59547	3.098
ENSMUSG00000037204	Atg101	-1.1733	0.000262487	6.45392	5.3294	4.38409	2.63243	16.5234	15.163	11.5168	7.76517
ENSMUSG00000022553	Maf1	-1.48888	0.000262725	2.56784	2.89908	1.57268	1.0108	21.6189	22.3006	10.4704	6.15269
ENSMUSG00000022148	Fyb	-1.28258	0.000266036	0.157686	0.137232	0.102995	0.058918	2.03415	1.68967	1.43868	1.01996
ENSMUSG00000020677	Ddx52	-1.02529	0.00026644	0.981277	1.10224	0.729849	0.651655	4.34367	4.31075	2.62653	2.38725
ENSMUSG00000053141	Ptprt	2.36091	0.000266758	0.00107449	0.000352523	0.00606375	0.00381101	0.00629342	0.00770514	0.0395574	0.0604402
ENSMUSG00000008333	Snrpb2	-1.05134	0.000267904	2.0369	1.93469	1.15858	1.46517	16.5149	15.419	8.63787	10.5396
ENSMUSG00000002297	Dbf4	-0.990491	0.000267904	1.59164	1.66686	1.26185	0.945937	4.7636	5.0028	3.32106	2.59013
ENSMUSG00000081975	Gm12482	-1.33935	0.000268454	14.8028	16.7552	9.46455	7.21403	186.331	176.476	114.712	100.458
ENSMUSG00000107142	4930566F21Rik	-1.15449	0.000268454	2.52885	2.13345	1.61943	1.19785	5.14631	4.62919	3.42557	3.14139
ENSMUSG00000089717	Or13f5	-1.32093	0.000272505	0.699468	0.780808	0.445851	0.347456	8.61967	8.1691	5.33352	4.73534
ENSMUSG00000020935	Dcakd	-1.38034	0.000273523	0.277092	0.282768	0.168203	0.118704	3.59199	3.87844	1.58605	1.16726
ENSMUSG00000099759	1700030C10Rik	-1.42107	0.000273523	0.818123	0.860602	0.505937	0.327295	2.91456	3.03475	1.97229	1.63648
ENSMUSG00000070493	Chchd2	-0.911164	0.000274087	5.79631	5.35075	3.89034	4.1785	68.1251	66.4347	58.8298	68.2524
ENSMUSG00000090935	Synj2bp	-1.42639	0.000274842	0.211671	0.213259	0.10901	0.104744	1.17169	1.10731	0.684808	0.65756
ENSMUSG00000030545	Pex11a	-3.73821	0.000277519	0.227458	0.191894	0.0227058	0.0189083	0.454916	0.591674	0.149859	0.283624
ENSMUSG00000018239	Zcchc10	-0.898772	0.000283767	4.81268	4.67037	3.10223	3.84675	9.27388	9.81976	7.09621	8.90496
ENSMUSG00000048351	Coa7	-1.07405	0.000283767	1.66532	1.58774	1.16428	0.915916	5.02639	4.83598	3.48069	3.01088
ENSMUSG00000076437	Selenoh	-0.944356	0.000283861	25.2848	26.6564	20.0188	16.3916	350.204	351.031	302.648	276.827
ENSMUSG00000100222	Psmb6-ps2	-1.15014	0.000284182	25.0507	21.2385	15.344	12.7969	273.242	270.73	181.447	155.007
ENSMUSG00000050229	Pigm	-1.76339	0.000285299	0.632707	0.744255	0.20704	0.359192	1.82096	1.79229	0.599553	0.763283
ENSMUSG00000023110	Prmt5	-1.12474	0.000290171	2.79057	2.69669	2.04214	1.33187	22.9165	22.3281	18.1177	10.9174
ENSMUSG00000022476	Polr3h	-1.45452	0.000292488	0.268331	0.306363	0.179145	0.0981464	4.33317	4.31323	3.04717	2.25201
ENSMUSG00000025007	Aldh18a1	-1.5443	0.000293451	0.18459	0.169671	0.0929551	0.0692413	1.43706	1.49551	0.785428	0.486465
ENSMUSG00000048668	Rhno1	-1.11553	0.00029579	3.14501	2.96934	2.12186	1.67518	10.9237	10.5771	6.45926	5.14029
ENSMUSG00000027810	Eif2a	-1.06375	0.000298752	0.706477	0.584893	0.432985	0.404675	5.72725	5.04131	2.95376	2.69355
ENSMUSG00000003037	Rab8a	-1.14062	0.000301111	1.04995	0.987934	0.740487	0.498929	7.99911	7.58006	4.3927	3.05034
ENSMUSG00000030726	Pold3	-1.46824	0.000303448	0.265911	0.209379	0.139564	0.0894016	1.6516	1.52091	0.796094	0.565637
ENSMUSG00000066232	Ipo7	-0.990464	0.000304482	0.582314	0.618039	0.424115	0.392817	2.60749	2.65024	1.61062	1.64204
ENSMUSG00000040918	Slc19a2	1.00323	0.000305666	0.617106	0.691651	1.74679	1.81415	1.20211	1.19722	3.16058	3.51621
ENSMUSG00000022652	Morc1	-0.906386	0.000306712	0.184786	0.18044	0.136262	0.127741	0.97998	0.993856	0.703996	0.773583
ENSMUSG00000093862	Gm5117	-2.06692	0.000306712	1.27851	1.3932	0.39564	0.478262	3.05928	3.46053	0.982719	0.717392
ENSMUSG00000007564	Ppp2r1a	-1.07277	0.000311082	1.27004	1.35027	0.977202	0.694596	13.2803	14.0512	8.78375	6.12957
ENSMUSG00000039068	Zzz3	-1.09436	0.000311836	0.268265	0.331329	0.20995	0.167182	0.678451	0.773384	0.457149	0.410904
ENSMUSG00000051234	Rnf7	-0.9252	0.000312136	4.46617	4.22535	3.2124	2.98891	21.171	20.0593	18.4113	18.1614
ENSMUSG00000089999	Gm6485	-1.06228	0.00031298	106.216	102.584	81.3459	52.9997	421.015	387.596	261.776	167.343
ENSMUSG00000020840	Blmh	-1.19957	0.000314145	0.277593	0.252135	0.182257	0.12684	2.90355	2.8505	1.72051	1.13831
ENSMUSG00000032478	Nme6	-1.13465	0.000315713	1.47852	1.27264	0.823371	0.883248	10.2878	9.70527	5.15707	5.4238
ENSMUSG00000059772	Slx1b	-2.69947	0.000315947	0.470571	0.39959	0.134107	0.0322147	3.81993	4.40457	2.85751	3.25369
ENSMUSG00000082878	Gm12583	-1.20646	0.000317996	12.9145	13.182	7.75419	7.55472	127.437	128.39	96.9083	80.4776
ENSMUSG00000054237	Fra10ac1	-1.88181	0.000318208	0.124166	0.107739	0.0447517	0.0399289	0.656773	0.641608	0.220105	0.292812
ENSMUSG00000112964	E430024I08Rik	-2.51103	0.000318512	0.0802393	0.0846169	0.0224275	0.0155637	0.309494	0.323425	0.252042	0.295711
ENSMUSG00000087207	Gm13147	-1.75794	0.000318512	0.819981	0.740605	0.328957	0.291902	2.45994	1.75656	0.938335	0.808343
ENSMUSG00000041671	Pyroxd1	-2.24251	0.00032152	0.192036	0.156424	0.0555264	0.0423863	1.52966	1.31331	0.65151	0.674327
ENSMUSG00000041801	Phlda3	1.02524	0.000324833	4.49989	5.39849	15.2118	11.9349	10.3517	12.7739	41.5653	33.647
ENSMUSG00000022881	Rfc4	-1.20093	0.000324978	1.01827	1.09372	0.713304	0.516311	8.81792	8.40045	4.06017	3.35848
ENSMUSG00000044881	Coa4	-2.08004	0.000325179	1.46643	0.852092	0.375311	0.370113	4.0636	3.70399	1.55063	1.5627
ENSMUSG00000038712	Mindy1	-1.20447	0.000328447	0.719631	0.793451	0.452845	0.434771	4.63238	4.57105	2.4291	2.07317
ENSMUSG00000068417	Pnp2	-1.69522	0.000331153	0.572347	0.550234	0.230662	0.240105	3.64039	3.96954	1.72997	1.74269
ENSMUSG00000027722	Spata5	-1.06209	0.000337039	0.134731	0.125042	0.0923039	0.0754173	0.380029	0.370802	0.255013	0.236052
ENSMUSG00000030934	Oat	-1.0854	0.000339868	0.763964	0.809543	0.47873	0.530593	9.93154	9.11115	5.14376	4.12643
ENSMUSG00000039449	Prpf18	-1.35892	0.000340445	0.327734	0.278673	0.17562	0.142185	0.828061	0.874193	0.45531	0.45138
ENSMUSG00000006418	Rnf114	-1.12076	0.000341016	0.688663	0.807044	0.519299	0.403616	2.45739	2.75029	1.98718	1.54239
ENSMUSG00000039771	Polr2j	-1.03466	0.000341355	4.17977	3.79611	2.91941	2.3302	24.9772	23.7665	13.8801	14.2174
ENSMUSG00000074867	Zfp808	-1.04765	0.000347635	0.231479	0.194361	0.149639	0.128952	1.56441	1.40426	1.12413	1.11461
ENSMUSG00000037999	Arap2	1.54954	0.000348891	0.0199372	0.01682	0.0895599	0.0546927	0.0825972	0.0960141	0.2848	0.286722
ENSMUSG00000018965	Ywhah	-0.840944	0.0003496	6.37575	6.92734	5.23406	4.81824	28.0762	28.8002	18.6788	15.7964
ENSMUSG00000082536	Gm13456	-0.891752	0.000351057	90.1834	98.556	78.0318	59.1865	1158.42	1235.84	1208.38	830.748
ENSMUSG00000025047	Pdcd11	-1.74907	0.000351227	0.180114	0.138193	0.083245	0.0412632	0.892063	0.801243	0.565273	0.410982
ENSMUSG00000031198	Fundc2	-1.37214	0.000352521	0.746143	0.542636	0.315146	0.366641	6.72357	6.14443	3.6404	4.35145
ENSMUSG00000003660	Snrnp200	-1.34917	0.00035305	0.234483	0.293408	0.142257	0.137503	2.82288	3.308	1.50589	1.40465
ENSMUSG00000074026	Gm6091	-2.40218	0.00035305	14.8365	20.5136	5.72669	2.87778	124.344	123.777	46.011	23.0223
ENSMUSG00000028354	Fmn2	1.35031	0.000368408	0.0110795	0.0116201	0.042746	0.0353007	0.0254283	0.0277095	0.115546	0.132536
ENSMUSG00000110960	Supt4b	-1.10535	0.000368909	45.6658	48.2156	32.3972	26.283	262.205	248.76	177.767	161.563
ENSMUSG00000079179	Rab10os	-1.89905	0.000370514	0.257455	0.291795	0.113392	0.0817161	2.43022	2.62999	2.37688	2.26535
ENSMUSG00000038871	Bpgm	-1.38045	0.000370514	0.267577	0.267265	0.147364	0.129176	1.3696	1.35584	0.620479	0.574371
ENSMUSG00000039069	Mtg2	-1.5158	0.000372688	0.506174	0.397065	0.234027	0.190456	1.90291	2.01155	1.7169	1.74511
ENSMUSG00000028675	Pnrc2	-0.920407	0.000376422	11.4267	10.4057	7.93187	7.72464	20.7668	18.3469	13.753	14.6629
ENSMUSG00000029073	Cptp	-1.91698	0.000384146	1.06244	0.826844	0.414365	0.244419	2.32255	2.11575	0.966851	0.560726
ENSMUSG00000025484	Bet1l	-1.35859	0.000385812	2.88366	2.37207	1.65095	1.08624	6.32455	5.92332	3.97162	2.33461
ENSMUSG00000082319	Actr3-ps	-1.69193	0.000386738	2.08608	2.22434	0.99956	0.780359	25.331	22.6589	8.67674	3.78619
ENSMUSG00000071379	Hpcal1	1.37915	0.000387164	0.0345987	0.0357566	0.139579	0.106705	0.120519	0.099324	0.408745	0.328839
ENSMUSG00000058773	H1f5	-1.35154	0.000391202	16.3954	20.0751	12.1035	6.84725	50.9906	58.6038	42.8445	27.2977
ENSMUSG00000048222	Mfap1b	-1.57191	0.00039166	0.43821	0.385691	0.181369	0.19615	1.36098	1.38102	0.668947	0.740465
ENSMUSG00000027206	Cops2	-0.940145	0.000394034	1.03491	1.03055	0.772877	0.682192	5.53836	5.05326	3.5706	3.41331
ENSMUSG00000000561	Wdr77	-0.931517	0.000394656	4.29402	5.12439	3.70753	2.94375	23.0981	25.1057	16.1006	12.5316
ENSMUSG00000005881	Ergic3	-1.75474	0.000395297	0.717544	0.504461	0.311981	0.16569	11.2643	8.22271	6.10272	4.33445
ENSMUSG00000073427	Gm4924	-1.97044	0.000395884	0.0594514	0.0652028	0.027537	0.0138379	0.119752	0.12957	0.0873587	0.105761
ENSMUSG00000100319	Gm5256	-1.85124	0.000396635	4.5858	5.75647	2.30346	1.4696	49.5798	47.8179	24.1121	18.6407
ENSMUSG00000079658	Eloc	-0.875668	0.000397799	3.36749	3.65153	2.22707	3.00242	20.1251	21.9916	10.7099	15.1272
ENSMUSG00000027509	Rae1	-1.22066	0.000397855	1.18266	1.49085	0.955192	0.57313	7.75632	7.76271	4.15654	3.1088
ENSMUSG00000105124	Gm5297	-1.11606	0.000404777	15.8284	18.3716	12.3264	8.80502	178.641	189.252	128.217	91.9314
ENSMUSG00000114809	Atp5c1-ps	-1.82713	0.000404812	2.76954	3.67587	1.38401	1.02556	36.8432	36.8	26.5073	25.346
ENSMUSG00000029718	Pcolce	-1.38143	0.000406317	1.27556	1.03742	0.709303	0.4766	20.7983	20.0743	12.6811	8.68818
ENSMUSG00000031505	Naxd	-1.66708	0.000406458	0.377332	0.318805	0.181068	0.108813	3.48281	3.05658	1.24507	1.01041
ENSMUSG00000017716	Birc5	-0.827275	0.000408568	7.60333	7.69565	5.73073	5.98622	56.5447	54.1435	38.4943	36.7845
ENSMUSG00000031578	Mak16	-0.867006	0.00040879	8.40895	8.67742	6.98805	5.66616	27.2445	27.2719	23.9275	19.5435
ENSMUSG00000022010	Tsc22d1	-0.885838	0.000409658	1.95826	1.76794	1.54479	1.18264	3.93348	3.65951	3.19386	2.70954
ENSMUSG00000027953	Slc50a1	-3.10477	0.000409658	0.977704	0.690888	0.182184	0.0583513	15.3174	11.2763	2.90093	2.18818
ENSMUSG00000045969	Ing1	-1.00264	0.000414869	2.67869	3.05477	2.05738	1.80159	6.9737	8.07385	5.46795	4.5393
ENSMUSG00000027323	Rad51	-1.05831	0.000415667	0.692982	0.58274	0.455087	0.371926	5.50181	5.33902	3.05867	2.165
ENSMUSG00000034190	Chmp7	-1.58362	0.000418848	0.341272	0.358045	0.155137	0.161487	1.74011	1.81237	0.740044	0.571753
ENSMUSG00000044221	Grsf1	-0.898785	0.000419224	1.95519	2.01359	1.49043	1.39123	8.87676	9.51566	6.25979	5.54462
ENSMUSG00000027811	4930579G24Rik	-1.07482	0.000421345	4.47037	4.12403	2.87342	2.64663	9.15881	8.58533	5.94712	5.81896
ENSMUSG00000100309	Gm6644	-1.63311	0.000421873	8.88696	8.74702	5.17352	2.28251	111.547	111.54	76.4036	47.7188
ENSMUSG00000093674	Rpl41	-0.758972	0.000427261	129.579	142.507	110.815	107.156	1406.94	1592.74	1546.32	1715.07
ENSMUSG00000091228	Gm20390	-0.784078	0.000430413	4.32848	4.34416	3.38968	3.45134	54.2322	53.5335	48.3091	51.8361
ENSMUSG00000091549	Gm6548	-1.11008	0.000433439	15.8598	17.6291	12.1102	8.67569	181.313	184.465	169.739	107.718
ENSMUSG00000026687	Aldh9a1	-1.45506	0.000436544	0.474664	0.399122	0.253044	0.171943	7.90896	7.74112	5.335	3.83763
ENSMUSG00000045435	Tmem60	-1.07682	0.000436711	3.56193	3.11358	2.10257	2.20314	6.93705	5.82265	3.63424	3.95695
ENSMUSG00000031533	Mrps31	-0.920057	0.000436711	1.63985	1.74252	1.27448	1.14137	6.66446	6.19284	3.79318	3.95772
ENSMUSG00000110834	Gm39469	-1.72852	0.00043747	0.53014	0.598385	0.135943	0.34528	1.2451	1.34038	0.761282	1.0981
ENSMUSG00000115463	Gm49356	-1.13129	0.000437581	0.298331	0.257825	0.170162	0.17501	3.4866	2.98528	1.55925	1.46218
ENSMUSG00000035325	Sec31a	-1.45442	0.000441769	0.13027	0.152391	0.0811796	0.055921	0.981295	1.134	0.481706	0.400146
ENSMUSG00000060519	Tor3a	-1.26943	0.000442026	0.556445	0.525554	0.348766	0.251841	1.39954	1.17005	0.831068	0.59853
ENSMUSG00000033272	Slc35a4	-1.17343	0.000442026	2.75941	2.96286	1.91417	1.48892	9.68301	11.049	5.77054	4.32079
ENSMUSG00000116947	2410003I16Rik	-1.34203	0.000444655	2.7822	2.27338	1.26184	1.46623	7.61167	6.76847	3.86378	4.17468
ENSMUSG00000067713	Prkag1	-1.44135	0.000446632	0.345515	0.419731	0.207069	0.170263	3.93451	3.91239	1.31028	0.959992
ENSMUSG00000012535	Tnpo3	-1.03853	0.000446632	0.335904	0.352213	0.256658	0.193498	2.99951	3.27043	1.84143	1.37806
ENSMUSG00000033099	Nol12	-1.25229	0.000447992	1.17831	1.04773	0.591327	0.685658	5.80452	5.79219	3.14002	3.38154
ENSMUSG00000054648	Zfp869	-0.985273	0.000448225	1.52956	1.76574	1.19844	1.04629	2.58317	3.13108	2.34229	2.02629
ENSMUSG00000019710	Mrpl24	-1.20191	0.000448595	3.30106	3.07011	2.13466	1.57904	48.0613	44.6336	26.9921	25.4599
ENSMUSG00000097906	Gm9625	-0.961922	0.00044981	48.8261	46.2552	37.7347	28.0568	681.735	706.743	804.166	632.449
ENSMUSG00000084220	Gm12387	-2.3152	0.000451255	3.29576	2.46294	0.682364	0.923387	9.76522	9.55139	2.6271	3.12531
ENSMUSG00000068245	Phf11d	-1.16127	0.000452239	0.677596	0.762202	0.474385	0.390538	3.07177	3.03928	1.92279	1.9264
ENSMUSG00000033054	Npat	-1.17503	0.000457973	0.28443	0.3061	0.174726	0.18006	0.543854	0.558364	0.508452	0.465609
ENSMUSG00000026767	Mindy3	-1.45668	0.00045837	0.0992854	0.0865992	0.0473798	0.0441526	0.572304	0.552169	0.177787	0.218884
ENSMUSG00000092360	Gm20441	-1.20946	0.000462114	1.17137	1.20121	0.757662	0.62095	10.254	10.1831	6.41098	7.00175
ENSMUSG00000005882	Uqcc1	-1.48916	0.000462713	0.146734	0.114851	0.0820265	0.0414724	0.669386	0.559813	0.357011	0.280549
ENSMUSG00000066042	Med18	-1.57884	0.000464455	0.943178	1.19356	0.483314	0.483498	1.67302	2.00032	0.92269	1.0062
ENSMUSG00000043866	Taf10	-2.50051	0.000465779	0.527848	0.427175	0.11803	0.109211	8.02329	8.56658	4.07204	3.54934
ENSMUSG00000074863	Platr25	-1.7588	0.000466851	0.0596456	0.0561259	0.0161218	0.0320379	0.135677	0.150314	0.111387	0.212061
ENSMUSG00000105852	Gm42890	-0.919393	0.000466851	1.8393	2.2012	1.60201	1.27569	9.85138	10.7203	6.92474	5.42711
ENSMUSG00000021814	Anxa7	-1.11421	0.000467124	0.529576	0.558139	0.356298	0.321796	5.34966	5.15472	2.54255	1.86805
ENSMUSG00000022369	Mtbp	-1.55015	0.000471887	0.0895203	0.0864483	0.0457943	0.0344003	0.337813	0.286776	0.134078	0.164138
ENSMUSG00000022678	Nde1	-1.16995	0.000476282	0.689905	0.684846	0.503236	0.313387	3.31194	3.3836	1.99426	1.42282
ENSMUSG00000050708	Ftl1	-0.822329	0.000476692	221.974	215.553	186.315	148.493	2428.23	2519.01	2191.51	2078.62
ENSMUSG00000111425	Gm47324	-4.18228	0.000478146	1.26351	1.29768	0.153548	0	2.80169	2.48723	0.184258	0.127867
ENSMUSG00000020706	Ftsj3	-1.27903	0.000492189	2.24307	2.13333	1.5216	0.879938	20.7421	19.0429	10.6324	7.23504
ENSMUSG00000110104	Gm45717	-0.892307	0.000492189	4.89479	4.58708	3.45429	3.48459	65.9581	57.5734	52.7847	52.7335
ENSMUSG00000030744	Rps3	-0.834067	0.000495918	22.4745	22.7981	18.9932	15.336	307.96	300.912	319.232	276.453
ENSMUSG00000056305	Usp39	-1.17542	0.000499253	0.604697	0.588683	0.420393	0.286617	6.01838	5.64876	3.68028	2.78683
ENSMUSG00000006024	Napa	-1.0405	0.000504243	1.31993	1.16982	0.924834	0.705512	14.5521	13.5147	8.07143	5.88738
ENSMUSG00000063236	1110038F14Rik	-1.40657	0.00050657	4.24071	3.36234	2.31794	1.50802	19.1303	16.9044	7.98109	4.77082
ENSMUSG00000031387	Renbp	-1.21606	0.00050657	1.54896	1.20914	0.858426	0.745935	15.0957	13.9051	6.96818	5.39249
ENSMUSG00000114733	Gm4815	-1.57755	0.00050733	10.5548	12.5241	7.27706	2.8662	81.155	78.7806	35.238	19.0398
ENSMUSG00000004393	Ddx56	-1.10587	0.000512481	3.58775	3.27857	2.63121	1.64719	24.0544	22.3798	14.3631	9.03271
ENSMUSG00000067220	Cnga1	-1.08515	0.000513208	0.466806	0.540038	0.368545	0.267456	5.18514	5.49934	3.76654	2.76482
ENSMUSG00000029634	Rnf6	-1.28327	0.000513208	0.754269	0.779513	0.471719	0.373073	1.9941	2.01838	1.0752	0.839414
ENSMUSG00000032044	Rpusd4	-1.16331	0.000518277	1.35865	1.18609	0.818948	0.714977	4.31815	4.40714	3.11398	2.53679
ENSMUSG00000114488	Gm5802	-2.09883	0.000523413	3.99106	5.72866	1.81274	1.1612	77.3269	79.8738	49.5948	38.997
ENSMUSG00000051256	Jagn1	-1.15703	0.000523413	8.58694	5.28993	4.9211	3.49892	17.2254	12.4242	8.99612	6.63835
ENSMUSG00000090704	Trp53-ps	-1.31596	0.000526209	7.62435	8.09675	4.82294	3.61934	85.7238	86.4969	49.6595	31.2314
ENSMUSG00000034457	Eda2r	0.953422	0.000531567	0.36549	0.342541	1.00279	0.852277	0.763228	0.702276	1.85611	1.76241
ENSMUSG00000049832	Rbx1-ps	-0.824155	0.000532832	131.367	139.474	100.638	107.247	1086.05	1117.72	785.875	851.133
ENSMUSG00000024666	Tmem138	-1.35986	0.00053419	1.08361	1.06654	0.572626	0.561584	5.24872	5.11608	2.1154	2.1084
ENSMUSG00000110841	Gpx4-ps2	-0.936382	0.000535702	39.0258	36.2103	28.5503	24.598	422.719	420.678	388.454	360.659
ENSMUSG00000098761	Gm18821	-1.18827	0.000548861	23.5118	16.8302	12.7758	11.194	93.1428	83.9893	50.6436	43.245
ENSMUSG00000020332	Meikin	-1.80146	0.000550447	0.128743	0.108321	0.064424	0.0241662	0.262677	0.234015	0.168315	0.158289
ENSMUSG00000026761	Orc4	-0.963414	0.000551729	0.437263	0.441258	0.308979	0.301615	1.66676	1.63326	1.08829	1.02492
ENSMUSG00000083793	Gm14274	-2.3629	0.00055182	4.45439	3.73128	1.05961	1.10298	47.861	52.7043	16.7418	14.6697
ENSMUSG00000064194	Zfp936	-1.12817	0.000556606	0.20581	0.204043	0.145174	0.106261	0.389168	0.419135	0.366908	0.398042
ENSMUSG00000097530	Kansl2-ps	-1.41837	0.000556606	6.46294	5.49732	3.63519	2.32147	16.5563	16.0993	12.3775	6.59298
ENSMUSG00000022883	Robo1	1.4961	0.000559638	0.00513507	0.00365458	0.0204474	0.0128718	0.0146942	0.0127522	0.072692	0.0938721
ENSMUSG00000038400	Pmepa1	1.25695	0.0005616	0.0906594	0.0903335	0.330984	0.251399	0.210419	0.204903	0.78773	0.735961
ENSMUSG00000058638	Zfp110	-1.01693	0.000563529	1.1092	1.20779	0.819877	0.72478	2.97751	3.1954	2.17947	1.95133
ENSMUSG00000027207	Galk2	-1.91345	0.000565191	0.0311937	0.0270366	0.00936955	0.0119205	0.238842	0.224999	0.0780796	0.152799
ENSMUSG00000010760	Phlda2	-1.78197	0.000565248	4.68177	4.14367	2.45487	0.886988	53.8222	42.1154	27.9775	23.7797
ENSMUSG00000028622	Mrpl37	-1.258	0.000567679	1.05493	1.04354	0.696405	0.47505	15.3945	14.8704	7.70491	5.61423
ENSMUSG00000061286	Exosc5	-1.1785	0.000567968	1.14614	1.05759	0.750167	0.555784	15.7834	14.5289	8.86052	7.0529
ENSMUSG00000062382	Ftl1-ps1	-0.86138	0.000568177	16.923	17.9984	14.7523	11.1859	159.131	171.461	167.249	134.116
ENSMUSG00000018666	Cbx1	-0.936681	0.000568211	1.2067	1.35528	0.940051	0.869035	11.2128	11.633	7.82263	7.53975
ENSMUSG00000041712	Ubr7	-1.20505	0.000568667	0.68499	0.863098	0.538069	0.357362	3.14741	3.84762	1.77761	1.27138
ENSMUSG00000020492	Ska2	-1.02734	0.000570184	1.0634	1.38188	0.740424	0.894052	2.4144	3.12133	1.88068	2.0964
ENSMUSG00000010097	Nxf1	-1.06681	0.000572407	1.01422	1.01068	0.642247	0.670988	10.9544	10.434	6.32367	5.5932
ENSMUSG00000015971	Actr8	-1.27285	0.000576013	0.391099	0.405416	0.262821	0.176738	1.58936	1.67081	0.930341	0.70453
ENSMUSG00000060591	Ifitm2	-0.884138	0.000577583	28.3075	26.4662	20.0423	20.2734	386.38	337.183	309.099	309.052
ENSMUSG00000070713	Hmgn2-ps	-1.40709	0.000583434	6.02611	6.03091	3.28377	2.82885	59.299	56.6706	48.9451	36.1857
ENSMUSG00000031320	Rps4x	-0.854823	0.000591071	8.11348	9.09342	6.57656	6.30513	108.119	109.623	116.315	124.336
ENSMUSG00000054612	Mgmt	1.26565	0.000592493	0.0319067	0.0253182	0.113655	0.0713876	0.217164	0.217152	0.459183	0.401843
ENSMUSG00000081729	Hspa9-ps1	-1.33375	0.000592832	5.69896	6.29183	3.9949	2.31609	54.9995	57.6058	32.212	17.7918
ENSMUSG00000078151	Gm12226	-1.88598	0.000596724	7.65172	6.15597	3.60792	1.23897	12.7085	11.3951	5.50487	3.32972
ENSMUSG00000027835	Pdcd10	-0.939988	0.000596724	0.623768	0.574153	0.43022	0.416744	1.56231	1.4766	0.944385	1.01833
ENSMUSG00000032512	Wdr48	-1.71674	0.000596809	0.165429	0.148351	0.0770645	0.0492012	0.65804	0.660343	0.377102	0.335851
ENSMUSG00000049396	Gemin4	-1.17191	0.000599876	2.4731	2.30476	1.71779	1.11876	8.65173	9.1301	4.81808	3.44235
ENSMUSG00000063684	Hadhb-ps	-1.50602	0.000602259	4.12248	3.89687	1.84819	1.9951	25.7553	22.8992	11.5683	7.03036
ENSMUSG00000022554	Hgh1	-1.48907	0.000604792	2.24884	2.43929	1.18017	1.06824	6.51704	8.2213	3.56616	2.80414
ENSMUSG00000081093	Gm12565	-2.13741	0.000605925	4.8497	4.95012	1.85758	1.0452	45.7129	53.3022	12.4508	8.15255
ENSMUSG00000020593	Lpin1	1.14728	0.000609551	0.0780305	0.0984507	0.315881	0.208441	0.15868	0.175253	0.672455	0.519883
ENSMUSG00000033845	Mrpl15	-0.851635	0.000610919	3.8597	3.75774	3.03369	2.67892	23.9999	22.8577	14.3496	13.6706
ENSMUSG00000022972	Cfap298	-2.00318	0.000611145	0.325691	0.376045	0.10854	0.131206	4.37804	4.69748	1.57557	1.72754
ENSMUSG00000105954	Gm42793	-1.31659	0.000611145	9.26434	6.36918	4.39817	4.11768	70.9024	50.2203	43.0448	36.5174
ENSMUSG00000097191	Mm2pr	-1.49263	0.000611145	0.113567	0.0896007	0.0539126	0.0430076	0.613804	0.564218	0.331538	0.271682
ENSMUSG00000083477	Gm5555	-1.37955	0.000612141	6.55785	8.46842	4.45778	3.23598	61.9061	66.4565	35.8382	22.1634
ENSMUSG00000031982	Arv1	-1.52505	0.000615851	0.593318	0.478668	0.288176	0.209415	1.57083	1.16316	0.948805	0.967836
ENSMUSG00000042505	Sdhaf3	-1.23048	0.000616157	0.14207	0.109492	0.0764223	0.0686321	0.505286	0.439286	0.24088	0.300265
ENSMUSG00000020171	Yeats4	-1.07547	0.000616349	2.43513	2.3659	1.80685	1.24901	9.48947	9.2721	7.00285	5.3174
ENSMUSG00000028670	Lypla2	-3.61905	0.000617164	0.30447	0.325735	0.0370008	0.0308124	3.26974	4.58635	0.318207	0.308124
ENSMUSG00000028102	Pex11b	-1.5787	0.000617382	0.606722	0.775171	0.391347	0.217263	1.99518	2.09583	1.00446	0.638209
ENSMUSG00000042079	Hnrnpf	-0.83888	0.000617435	2.04816	2.31977	1.75542	1.54441	10.1579	10.1272	6.84139	5.76205
ENSMUSG00000038039	Gcc2	-1.53959	0.000620302	0.132619	0.112211	0.0650318	0.0473858	0.540947	0.526704	0.324509	0.319516
ENSMUSG00000002660	Clpp	-0.982349	0.000621675	5.0619	5.0017	3.91504	2.93976	46.2703	44.206	26.3199	22.1692
ENSMUSG00000068882	Ssb	-0.852995	0.000623894	4.36934	4.46788	3.52282	3.09323	37.2102	36.708	24.1338	21.5603
ENSMUSG00000046572	Zfp518b	-1.4291	0.000628429	0.456503	0.372089	0.213325	0.20338	0.920139	0.842466	0.472505	0.502224
ENSMUSG00000022205	Sub1	-0.761374	0.000633534	6.44892	6.02469	4.8463	5.16826	61.6615	57.4087	44.3602	45.9984
ENSMUSG00000071266	Zfp946	-2.54311	0.000634725	0.0753979	0.0600753	0.0150531	0.0167139	0.192085	0.189061	0.0662335	0.131622
ENSMUSG00000057113	Npm1	-0.727839	0.000635265	19.37	18.3243	14.8741	16.1073	163.212	159.413	133.557	147.451
ENSMUSG00000026457	Adipor1	-1.13685	0.000635634	0.719903	0.884113	0.551085	0.426459	6.93312	7.70806	4.52288	3.51734
ENSMUSG00000106447	Gm42957	-1.57496	0.000635634	0.350484	0.439343	0.2255	0.123138	1.13742	1.18785	0.58593	0.400197
ENSMUSG00000104126	Gm37486	-1.21339	0.000639688	66.3455	52.8356	44.007	24.7885	316.904	268.427	176.591	108.868
ENSMUSG00000028312	Smc2	-0.897732	0.000644201	0.919157	0.873084	0.71789	0.581216	3.89423	3.83057	2.62362	2.13251
ENSMUSG00000039483	Asb6	-1.26034	0.000653394	1.26446	1.34761	0.81491	0.646747	2.74638	3.5117	2.35919	1.79964
ENSMUSG00000055305	Zfp93	-2.57116	0.000656483	0.276612	0.311151	0.0751063	0.0551865	0.497902	0.715647	0.159049	0.137966
ENSMUSG00000059475	Zfp426	-2.34655	0.000657198	0.103575	0.0995732	0.0242372	0.0308359	0.243281	0.265529	0.0942558	0.165393
ENSMUSG00000050017	Pitpnb	-1.10754	0.000657884	0.379487	0.368532	0.281155	0.183725	2.65135	2.51697	1.25134	0.924514
ENSMUSG00000064289	Tank	-1.63134	0.000668794	0.0555202	0.0751382	0.0275881	0.0296149	0.187381	0.172287	0.0961274	0.159741
ENSMUSG00000013736	Trnt1	-0.953326	0.000668794	2.4135	2.15212	1.75662	1.42727	11.6049	10.185	7.20215	6.04431
ENSMUSG00000046441	Cmtr2	-2.02691	0.00067044	0.330346	0.461705	0.0960275	0.17685	0.482305	0.708814	0.155121	0.26143
ENSMUSG00000030245	Golt1b	-1.04289	0.0006737	1.00542	0.958554	0.687378	0.599322	5.00607	4.19281	3.08243	2.5196
ENSMUSG00000081068	Gm12804	-2.38206	0.000673972	1.86702	3.27327	0.65231	0.679013	6.76796	8.15447	1.56554	1.42593
ENSMUSG00000079884	Tmed2b	-1.77312	0.000675273	7.14102	6.36371	2.7512	2.58306	38.5036	33.3383	17.3164	7.74918
ENSMUSG00000075040	Zfp408	-3.07294	0.000675744	0.285577	0.252972	0.0425711	0.0443139	0.628268	0.665222	0.159642	0.276962
ENSMUSG00000121570	ENSMUSG00000121570	-1.30552	0.000676536	10.9112	11.2541	8.00931	3.89474	54.7653	53.8687	38.0199	20.9748
ENSMUSG00000028587	Orc1	-1.0197	0.000683306	0.460877	0.576746	0.362533	0.327568	1.32338	1.47589	0.914614	0.886924
ENSMUSG00000075232	Amd1	-1.07002	0.000684179	1.0604	1.19169	0.805116	0.635464	2.43733	2.41842	1.62129	1.45512
ENSMUSG00000042557	Sin3a	-1.10666	0.000684851	0.220409	0.234252	0.150978	0.133675	0.7378	0.824976	0.710348	0.664762
ENSMUSG00000026260	Ndufa10	-1.14473	0.000685519	0.56194	0.543215	0.409495	0.258869	7.9859	7.59348	5.94141	4.55065
ENSMUSG00002075877	Gm54913	-1.51863	0.000689114	89.5109	103.127	58.5716	29.879	498.902	495.144	294.798	125.976
ENSMUSG00000118642	AY036118	1.68501	0.000690182	1.84908	4.35209	10.2468	17.0285	29.0225	44.3913	149.567	189.466
ENSMUSG00000029780	Nt5c3	-1.20425	0.000694905	0.363473	0.266586	0.203972	0.164957	0.885527	0.750031	0.553077	0.530804
ENSMUSG00000036315	Polr1h	-1.01096	0.000700564	3.99296	4.02561	2.79791	2.58167	19.7707	20.6739	11.0599	12.3759
ENSMUSG00000030316	Tamm41	-1.25002	0.000700564	0.414142	0.335688	0.25194	0.17011	3.40362	3.07429	1.72175	1.60592
ENSMUSG00000006304	Arpc2	-0.9566	0.000702771	0.729348	0.787508	0.574049	0.479306	7.25538	6.98935	3.93214	3.65286
ENSMUSG00000083764	Gm11516	-1.53453	0.000705644	3.50012	5.65706	2.51271	1.67225	43.1436	50.9136	24.3033	18.0946
ENSMUSG00000037730	Mynn	-1.11943	0.00070718	0.661116	0.695804	0.442757	0.399939	1.20114	1.3594	0.905639	0.902719
ENSMUSG00000025962	Fastkd2	-1.1306	0.000707804	0.608511	0.505869	0.368628	0.318824	2.89225	2.32413	1.54227	1.31762
ENSMUSG00000050335	Lgals3	-1.48082	0.000708579	0.322933	0.320964	0.166366	0.143699	2.35867	2.38074	1.66543	1.45542
ENSMUSG00000025521	Tmem192	-1.10336	0.000720419	0.738948	0.672173	0.498086	0.384976	4.2096	3.92014	2.57096	1.94351
ENSMUSG00000082431	Prdx2-ps1	-1.08763	0.000725584	27.9227	31.3268	21.6673	15.6801	476.834	451.548	409.606	334.168
ENSMUSG00000027115	Kif18a	-1.03352	0.000725584	0.320999	0.292437	0.222702	0.18123	0.573213	0.546321	0.475846	0.44696
ENSMUSG00000027667	Zfp639	-1.05551	0.000725584	1.82437	1.68715	1.28483	0.987834	3.46134	3.47737	2.78225	2.09754
ENSMUSG00000057130	Txnl4a	-0.863936	0.000726518	7.05146	7.0247	6.00512	4.43421	29.481	29.0138	25.3316	20.9717
ENSMUSG00000025474	Tubgcp2	-1.76174	0.000726518	0.128841	0.100041	0.0544182	0.0349872	1.17961	1.06663	0.373725	0.306554
ENSMUSG00000081732	Gm15495	-1.66186	0.000726579	3.50961	3.45435	1.56457	1.39596	43.2704	39.7906	19.2716	14.4766
ENSMUSG00000031889	Phaf1	-0.927515	0.000726696	1.05466	1.2025	0.881439	0.717004	2.70035	2.88394	2.26255	2.08296
ENSMUSG00000027010	Slc25a12	-1.31931	0.000728333	0.079574	0.0789144	0.0380803	0.0491104	0.568472	0.577321	0.291162	0.34237
ENSMUSG00000107470	Gm3375	-1.42504	0.000736351	20.0886	15.0818	11.8446	5.54613	178.744	159.838	102.626	67.2362
ENSMUSG00000027222	Pex16	-2.21322	0.000737483	0.472205	0.377078	0.139456	0.103689	2.84214	2.12216	1.4344	0.922833
ENSMUSG00000046096	Mosmo	-1.69612	0.000739727	0.0692465	0.0942158	0.0375713	0.0296283	0.15275	0.199457	0.183303	0.189621
ENSMUSG00000081406	Rps6-ps4	-0.815147	0.000740096	112.842	123.839	99.2257	82.4854	1109.22	1129.24	1132.1	949.035
ENSMUSG00000094685	Gm5900	-1.70467	0.000746545	12.5898	14.0744	6.77724	3.97956	67.4565	58.2863	23.5466	14.1094
ENSMUSG00000042042	Csgalnact2	-2.65352	0.000750591	0.0551796	0.076035	0.0164513	0.010703	0.167378	0.162932	0.0873977	0.134858
ENSMUSG00000073705	Cenps	-1.10237	0.000760255	1.16473	1.11363	0.700707	0.742301	5.30782	4.7111	3.33611	3.13058
ENSMUSG00000024997	Prdx3	-0.966922	0.000760427	1.75313	1.80198	1.24985	1.21385	10.1416	9.75798	5.95151	5.28153
ENSMUSG00000004085	Map3k20	1.5837	0.000761316	0.0219073	0.0193696	0.113125	0.0518558	0.0672073	0.0639563	0.269632	0.221251
ENSMUSG00000031590	Frg1	-1.00855	0.000761316	1.12912	1.01775	0.795636	0.6432	7.06589	6.54519	3.75892	3.50648
ENSMUSG00000024056	Ndc80	-1.16583	0.000761372	0.392263	0.324537	0.213985	0.220539	1.67707	1.46601	0.80615	0.765271
ENSMUSG00000031160	Eras	-1.76515	0.00076776	1.04947	1.23159	0.579151	0.297515	3.74043	3.19155	1.97814	1.48758
ENSMUSG00000028252	Ccnc	-1.08931	0.000773915	0.361779	0.446883	0.239654	0.277885	3.3772	3.51809	1.96274	2.19782
ENSMUSG00000035754	Wdr18	-1.14763	0.000775713	1.83811	1.62083	1.26092	0.830035	23.2113	21.1279	12.6092	9.60951
ENSMUSG00000116378	Gcat	-1.22124	0.00078576	0.992233	0.917421	0.635914	0.460738	21.2378	20.5926	12.0291	9.05146
ENSMUSG00000030138	Bms1	-1.27678	0.0007899	0.25676	0.259075	0.164296	0.120279	2.06539	2.25697	1.21236	1.08439
ENSMUSG00000027719	Adad1	-1.10995	0.000806974	0.211572	0.226904	0.148956	0.124275	2.06283	2.0608	1.57882	1.33567
ENSMUSG00000049739	Zfp646	-2.12163	0.000807688	0.381579	0.41078	0.176646	0.0555102	0.918174	1.16192	0.669922	0.409388
ENSMUSG00000051396	Gm45902	-1.56887	0.000807769	0.698249	0.610893	0.335134	0.254457	5.95275	5.59522	1.95955	1.20662
ENSMUSG00000071078	Nr2c2ap	-1.00118	0.000815924	14.1073	13.2918	10.9059	7.49339	51.8474	55.3509	40.0512	27.3074
ENSMUSG00000006378	Gcat	-1.21787	0.000816434	1.53508	1.4112	0.9801	0.716423	33.0392	32.0281	18.6872	14.0383
ENSMUSG00000058388	Phtf1	-2.33165	0.00081903	0.0619089	0.0436694	0.0196112	0.00720495	0.283749	0.241705	0.185153	0.168116
ENSMUSG00000056962	Jmjd6	-1.14462	0.00082389	2.94433	2.72638	2.07907	1.35261	9.47223	9.77112	6.7299	4.36217
ENSMUSG00000117621	Hspe1-rs1	-0.783514	0.000833767	122.344	118.19	96.6098	92.9911	976.831	988.742	869.425	858.389
ENSMUSG00000032869	Psmf1	-1.41541	0.000833767	0.232118	0.210267	0.112533	0.112358	2.05619	2.02786	0.846294	0.772166
ENSMUSG00000067274	Rplp0	-0.817564	0.000844387	19.0138	18.5798	15.7753	13.07	375.912	380.051	412.36	370.529
ENSMUSG00000106190	Gm20768	-1.45282	0.000844832	2.64484	2.79966	1.52035	1.13249	9.8308	10.4619	6.4022	3.97824
ENSMUSG00000110175	Gm18255	-4.65704	0.000855277	1.52382	1.49983	0.127776	0	3.58098	4.57447	0.21296	0.354685
ENSMUSG00000041817	Fam169a	-1.02424	0.000855957	0.240542	0.248457	0.171279	0.153277	1.4835	1.43493	1.10539	1.02504
ENSMUSG00000072258	Taf1a	-1.44182	0.000858233	0.301344	0.335407	0.181051	0.131104	1.04766	1.0284	0.536856	0.524418
ENSMUSG00000025485	Ric8a	-1.63164	0.00086224	0.943142	0.673011	0.434966	0.256113	5.31303	5.2139	2.90856	2.10379
ENSMUSG00000036845	Lin37	-1.35598	0.000863541	1.51083	1.63053	0.866802	0.786609	5.49995	5.47857	3.14864	2.60661
ENSMUSG00000107068	Gm42742	-1.23141	0.00086414	1.70608	1.47999	0.99683	0.83011	5.54234	5.50251	3.66941	2.98391
ENSMUSG00000032458	Copb2	-1.12619	0.000875629	0.437229	0.511761	0.310477	0.275052	6.12593	6.10624	3.29898	2.68176
ENSMUSG00000116933	Atp5o	-0.971466	0.0008768	0.0720813	0.0721288	0.0499653	0.0497737	1.00674	0.984499	0.787894	0.93843
ENSMUSG00000028156	Eif4e	-0.791267	0.000878326	1.68852	1.59176	1.29678	1.27701	6.66018	6.2421	4.37737	4.38758
ENSMUSG00000015804	Med28	-0.817749	0.000891321	4.59951	4.52074	3.5687	3.44865	15.0676	14.0695	10.454	9.93361
ENSMUSG00000020495	Smg8	-1.34426	0.000892595	0.857244	0.786651	0.479213	0.390063	1.54046	1.72556	1.05211	0.93015
ENSMUSG00000035232	Pdk3	-1.29476	0.000894489	0.112959	0.195203	0.0867656	0.0822892	1.14167	1.13812	0.617	0.566993
ENSMUSG00000019715	Gle1	-1.26376	0.000895563	0.36683	0.31046	0.194614	0.187626	1.96733	1.99384	0.944337	0.908216
ENSMUSG00000040749	Siah1b	-0.946507	0.000900057	5.63832	5.19279	4.28322	3.29266	9.86707	9.17657	7.39011	5.43699
ENSMUSG00000020719	Ddx5	-0.776575	0.000900699	10.2237	10.6798	8.80708	7.70433	63.5003	63.5204	41.7036	34.005
ENSMUSG00000024174	Pot1b	-1.65425	0.000900711	0.0701225	0.0775274	0.0338298	0.029066	0.163299	0.189091	0.127801	0.134151
ENSMUSG00000031157	Pqbp1	-1.43983	0.000900711	1.20228	1.3524	0.678953	0.585386	13.2742	13.524	6.7621	5.42553
ENSMUSG00000027428	Rbbp9	-1.5342	0.000900974	0.772182	0.700021	0.420302	0.252257	3.79317	3.1401	1.23061	0.977495
ENSMUSG00000071497	Nutf2-ps1	-1.03683	0.000909155	19.4719	17.0641	12.9102	11.1425	156.616	145.172	108.2	88.6879
ENSMUSG00000018167	Stard3	-2.13069	0.000910624	0.158881	0.103412	0.0444084	0.0357881	0.630398	0.46157	0.244963	0.232623
ENSMUSG00000060475	Wtap	-0.751388	0.000910624	3.00225	3.32592	2.59839	2.49537	6.05773	6.77548	5.048	5.10969
ENSMUSG00000063785	Utp14a	-1.32215	0.000912895	0.350737	0.421431	0.25336	0.156384	2.95394	3.01727	1.27699	0.903845
ENSMUSG00000025001	Hells	-0.875864	0.000915743	0.9991	1.06198	0.838581	0.676019	7.08519	7.13514	3.71719	3.39192
ENSMUSG00000105189	Gm7774	-1.7134	0.000915937	7.21743	8.18011	2.87316	3.56348	26.1358	23.2487	11.8594	8.65417
ENSMUSG00000012640	Zfp715	-1.41756	0.000920578	0.320441	0.416054	0.173415	0.202334	0.524978	0.674409	0.335395	0.424504
ENSMUSG00000003269	Cyth2	-1.21535	0.00092164	1.23982	1.29972	0.832514	0.631803	6.1184	6.20258	3.8755	3.15901
ENSMUSG00000035439	Haus8	-1.21876	0.00092164	0.373047	0.388356	0.239285	0.200378	3.90025	3.89297	1.933	1.33029
ENSMUSG00000052738	Suclg1	-0.964154	0.000923184	0.796762	0.717859	0.561892	0.487412	12.1087	11.0092	7.16184	6.19369
ENSMUSG00000022437	Samm50	-1.20402	0.000924474	0.570588	0.536389	0.394479	0.246647	12.008	11.6241	6.2765	4.03038
ENSMUSG00000041638	Gcn1	-1.79794	0.000939358	0.0680332	0.066962	0.0210025	0.0330889	0.443739	0.465735	0.257139	0.259984
ENSMUSG00000082308	Gm15770	-1.08513	0.000939358	21.5579	25.246	16.1799	13.4738	129.547	129.865	81.9593	60.1673
ENSMUSG00000015776	Med22	-1.34142	0.000940438	1.56047	1.54649	0.980615	0.651281	5.59616	5.48686	3.19452	2.09161
ENSMUSG00000026520	Pycr2	-1.02391	0.000942487	6.08043	5.04769	4.12865	3.25229	35.1007	33.1425	22.6003	15.493
ENSMUSG00000010067	Rassf1	-1.16436	0.000948376	1.29489	1.15669	0.857684	0.60786	2.65506	2.69893	2.03168	1.44367
ENSMUSG00000030890	Ilk	-1.77886	0.000951795	0.736169	0.570605	0.293215	0.214188	5.52127	5.18979	2.77268	1.94911
ENSMUSG00000048520	Fbxl13	-1.60683	0.000952526	0.0302621	0.027658	0.0114794	0.0146746	0.26083	0.277999	0.116405	0.154712
ENSMUSG00000074748	Atxn7l3b	-1.22926	0.000960933	2.80661	2.68212	1.78786	1.34831	11.3896	11.6439	7.57105	4.57667
ENSMUSG00000014195	Dnajc7	-0.983496	0.000960933	0.725243	0.663165	0.540563	0.404775	7.1261	6.97398	4.71685	3.19827
ENSMUSG00000022721	Trmt2a	-1.15256	0.000960933	2.67807	2.2311	1.74838	1.2133	16.1832	14.4974	10.3459	7.34658
ENSMUSG00000027599	Armc1	-0.953951	0.000960933	0.633225	0.690291	0.494959	0.426315	2.63046	2.67963	1.6454	1.2918
ENSMUSG00000031562	Dctd	-1.76918	0.000964208	0.0872	0.0656947	0.033701	0.0263105	1.21865	1.01933	0.455566	0.365841
ENSMUSG00000031700	Gpt2	-1.18801	0.000964208	0.251571	0.33124	0.179748	0.164809	1.30284	1.41187	0.899673	0.973342
ENSMUSG00000024459	H2-M5	-1.39424	0.000980689	1.91556	1.95872	1.30284	0.644027	9.21596	8.46333	5.17566	3.69077
ENSMUSG00000046994	Mars2	-1.32953	0.000985354	0.63994	0.599387	0.337542	0.330338	1.07345	1.05655	0.602959	0.648664
ENSMUSG00000030680	Pagr1a	-1.22303	0.000992163	4.44683	3.80808	2.5982	2.16365	14.3706	14.2679	9.46589	7.71898
ENSMUSG00000027291	Vps39	-2.13632	0.000995193	0.0762804	0.103234	0.0159907	0.0425381	0.411596	0.486451	0.220317	0.305164
ENSMUSG00000115539	Gm6997	-1.14927	0.000996491	15.2296	16.7479	9.5121	10.0656	76.9001	79.2054	42.9358	45.1858
ENSMUSG00000019494	Cops6	-1.05765	0.00099922	3.69993	3.85023	2.59679	2.29526	94.1609	91.5713	54.159	46.0569
ENSMUSG00000031669	Gins3	-1.32813	0.00099922	0.933945	0.825338	0.586649	0.344777	2.0838	1.96697	1.37259	1.22133
ENSMUSG00000060098	Prmt7	-1.03696	0.00100092	0.433049	0.433083	0.323813	0.243078	6.92878	6.52914	3.79935	2.43564
ENSMUSG00000056394	Lig1	-1.07351	0.00101145	0.39812	0.469213	0.308521	0.244592	6.20931	6.64129	4.49218	3.19361
ENSMUSG00000026547	Tagln2	-0.990835	0.00101493	2.38422	2.34668	1.71489	1.49837	24.478	25.3128	15.8916	11.469
ENSMUSG00000032087	Dscaml1	2.35636	0.00101866	0.00178199	0.00192932	0.0171339	0.00808812	0.0144341	0.013856	0.0797924	0.0918728
ENSMUSG00000026032	Ndufb3	-1.23791	0.00102389	0.924695	0.820319	0.489712	0.51684	8.69943	8.15528	5.07056	5.67108
ENSMUSG00000032470	Mras	-1.05003	0.00102482	0.309591	0.33011	0.235772	0.178846	1.0645	1.10405	0.756852	0.720605
ENSMUSG00000032475	Nck1	-0.984342	0.00102572	0.347496	0.345221	0.256587	0.215436	0.58349	0.594547	0.467181	0.512763
ENSMUSG00000117552	Gm5686	-1.67519	0.00102687	4.26748	4.73196	2.32519	1.38307	24.1464	26.1587	12.4413	6.78963
ENSMUSG00000022551	Cyc1	-1.04947	0.00102911	8.45128	7.27058	5.97393	4.23649	93.624	90.2012	74.805	61.8875
ENSMUSG00000102252	Snrpn	-1.16234	0.00103553	0.0572792	0.0647429	0.0347055	0.0395668	0.807082	0.739451	0.459848	0.459319
ENSMUSG00000061897	Gm14292	-1.5142	0.00103744	13.6768	16.355	8.93171	4.909	35.0228	38.623	21.7934	11.7518
ENSMUSG00000072419	Dppa2	-0.889408	0.00103965	1.43725	1.48717	1.00946	1.14085	6.31286	6.51089	4.0605	4.1388
ENSMUSG00000068134	Zfp120	-1.60522	0.00104159	0.277018	0.208351	0.1271	0.0851606	0.533129	0.424418	0.287801	0.27373
ENSMUSG00000081700	Atp5k-ps2	-1.71998	0.00104159	22.7594	16.9373	7.75783	8.72144	311.692	314.434	192.86	227.403
ENSMUSG00000096433	Zfp994	-2.93955	0.00105774	0.0575625	0.060703	0.0126415	0.00717763	0.10279	0.0951014	0.0655059	0.0933092
ENSMUSG00000097239	Gm27029	-1.35289	0.00106282	0.360009	0.436598	0.233595	0.183303	5.97873	6.01114	3.2272	2.31561
ENSMUSG00000073982	Rhog	-2.88779	0.00106282	0.0998287	0.121974	0.0288651	0.00801245	0.185888	0.227007	0.0962169	0.152237
ENSMUSG00000029145	Eif2b4	-1.18779	0.00106421	1.76655	1.9634	1.26492	0.924004	15.4226	15.5314	8.17207	5.78657
ENSMUSG00000084796	Mir142hg	-1.41498	0.00107101	9.98801	7.47405	6.06149	2.62735	17.3422	13.7698	11.0139	6.09068
ENSMUSG00000051235	Gen1	-2.1656	0.00107101	0.0954018	0.145118	0.0484828	0.020187	0.251514	0.369196	0.139388	0.176636
ENSMUSG00000028811	Yars	-1.12669	0.00107101	0.540916	0.443986	0.349321	0.256807	4.4816	4.35337	2.51074	1.71356
ENSMUSG00000041308	Sntb2	1.02532	0.00107101	0.124951	0.128449	0.401247	0.29326	0.333897	0.363485	0.978282	0.864429
ENSMUSG00000002983	Relb	-1.41622	0.00109016	0.291155	0.375506	0.204853	0.125607	0.998962	1.25992	0.77311	0.598822
ENSMUSG00000070348	Ccnd1	-1.15598	0.00109464	1.17797	1.30291	0.870398	0.617593	8.18747	8.92525	6.06019	4.79822
ENSMUSG00000024429	Gnl1	-2.08138	0.00109882	0.297131	0.298421	0.108474	0.0776288	2.78333	3.35425	1.65084	1.0374
ENSMUSG00000060121	Gemin2	-1.0038	0.00110396	0.997336	1.00827	0.70015	0.652331	4.44549	4.39452	2.524	2.39788
ENSMUSG00000066798	Zbtb6	-1.83055	0.00110936	0.187999	0.204516	0.0700628	0.0806079	0.343015	0.366831	0.189907	0.241824
ENSMUSG00000020561	Polr1f	-0.901483	0.00111009	2.09687	2.07362	1.5934	1.42498	4.08469	4.19602	3.32812	3.37494
ENSMUSG00000020402	Vdac1	-0.891189	0.00111722	1.00691	1.07146	0.824334	0.686939	16.3515	17.0208	14.1815	10.5418
ENSMUSG00000026662	Sephs1	-0.95414	0.00111722	0.605095	0.60744	0.429284	0.418783	2.42641	2.53858	1.63061	1.36397
ENSMUSG00000107928	Gm45140	-1.11313	0.00112082	0.301769	0.317797	0.225619	0.157534	2.82148	2.86261	1.52033	1.37445
ENSMUSG00000081816	Gm15528	-1.49293	0.00112101	6.00402	6.77266	3.39405	2.66937	30.4923	32.8009	15.9143	10.0494
ENSMUSG00000023919	Cenpq	-1.00989	0.00112375	1.36521	1.22417	0.898969	0.842476	2.68183	2.64917	1.6893	1.83196
ENSMUSG00000025894	Aasdhppt	-0.970706	0.00112375	1.4374	1.50466	1.13204	0.887255	7.31406	6.74555	4.50598	4.29302
ENSMUSG00000025451	Paip1	-0.893636	0.00112583	0.895409	0.790273	0.610558	0.622955	2.55241	2.43086	1.83827	1.862
ENSMUSG00000025724	Sec11a	-0.923293	0.00112583	0.69576	0.556403	0.457309	0.439655	3.53587	2.69107	2.20754	2.02906
ENSMUSG00000107283	Mpv17	-1.20404	0.00112805	0.788694	0.620176	0.383384	0.453952	6.04808	5.34111	1.78513	1.70606
ENSMUSG00000005699	Pard6a	-1.38985	0.00112805	3.12646	2.63763	1.65064	1.29949	7.81615	8.30364	4.9658	3.49419
ENSMUSG00000020743	Mif4gd	-1.07634	0.00113031	2.6651	2.65721	1.87681	1.51726	16.3944	17.181	10.6417	8.67387
ENSMUSG00000057409	Zfp53	-2.05785	0.00113336	0.138415	0.152263	0.0591699	0.0315857	0.461382	0.478159	0.17751	0.161087
ENSMUSG00000029462	Vps29	-0.849073	0.00113336	2.94286	2.81546	2.21291	2.12139	24.7563	22.1995	15.9999	15.9871
ENSMUSG00000028416	Bag1	-1.38659	0.00113347	0.6369	0.593117	0.375208	0.250876	13.0956	12.7882	6.75101	5.63901
ENSMUSG00000082793	Btf3-ps4	-1.39446	0.00113366	13.6608	13.1896	6.76386	7.11645	101.741	106.029	66.4749	62.6854
ENSMUSG00000060600	Eno3	-2.41465	0.00113925	0.395012	0.421191	0.0858736	0.127698	5.81545	6.03707	1.93829	1.46853
ENSMUSG00000057835	Zfp119a	-2.26826	0.00115024	0.220042	0.138936	0.0487386	0.0531496	0.365352	0.290132	0.123007	0.173944
ENSMUSG00000082070	Gm1866	-1.50296	0.0011516	13.93	9.86207	5.25971	6.25717	109.241	97.0572	63.4581	47.4976
ENSMUSG00000052825	Gm9892	-0.768479	0.00115523	126.913	111.961	100.081	90.1938	796.617	755.678	601.043	534.735
ENSMUSG00000030768	Disp1	-2.5774	0.00115542	0.018099	0.0127243	0.00240896	0.00501515	0.0564517	0.0407178	0.0317983	0.0571727
ENSMUSG00000081929	Rps11-ps2	-0.92902	0.00115863	58.9253	55.9845	45.0873	36.2968	521.636	542.358	567.985	483.462
ENSMUSG00000026283	Ing5	-1.08309	0.00115927	0.777706	0.942592	0.626974	0.460027	2.08888	2.32169	1.44258	1.21178
ENSMUSG00000032905	Atg12	-1.10012	0.00116069	1.11099	1.24899	0.840426	0.634622	3.51643	3.81219	2.88309	2.28345
ENSMUSG00000080904	Gm11966	-1.31589	0.00116131	89.7741	94.9546	38.9497	63.935	1103.42	1075.49	599.6	776.576
ENSMUSG00000044627	Swi5	-0.886811	0.00116131	2.41076	2.53387	1.82267	1.80205	39.8625	38.9498	30.7848	32.4663
ENSMUSG00000058669	Nkx2-9	2.20197	0.00116402	0.245933	0.514379	2.90428	1.75308	0.799283	0.847213	8.07698	5.68856
ENSMUSG00000116637	Gm8130	-0.941784	0.00116521	68.6141	69.9492	57.2201	39.748	857.523	854.89	993.778	843.634
ENSMUSG00000013997	Nit1	-1.64587	0.00117798	0.564626	0.540715	0.238859	0.239757	7.79794	7.94551	4.60656	3.47203
ENSMUSG00000073460	Pnldc1	-1.73933	0.00118886	0.227702	0.23212	0.122743	0.0567855	1.22525	1.17661	0.434903	0.353332
ENSMUSG00000025184	R3hcc1l	-1.44369	0.00118886	0.0887144	0.0912157	0.0535779	0.034108	0.215449	0.215175	0.166933	0.189899
ENSMUSG00000004266	Ptpn6	-1.78591	0.00118959	0.210384	0.210257	0.0940865	0.0678033	3.0004	2.89263	0.700221	0.61023
ENSMUSG00000024732	Ccdc86	-1.02197	0.0011897	3.49597	3.27883	2.69083	1.78601	9.19284	9.61543	6.99699	5.37545
ENSMUSG00000091955	Gm9844	-0.751354	0.0011897	141.569	136.028	112.596	111.331	2578.65	2649.36	3235.11	3547.48
ENSMUSG00000001785	Pwp1	-1.02237	0.00119029	0.287505	0.302228	0.221399	0.168437	2.50931	2.40916	1.31856	1.02428
ENSMUSG00000113081	Gm3333	-1.83555	0.00119043	0.289237	0.299407	0.117084	0.104466	0.703144	0.687164	0.37913	0.522331
ENSMUSG00000106755	Tpi-rs11	-1.72221	0.00119256	13.7255	13.1392	6.41147	4.37635	371.527	346.061	159.131	101.313
ENSMUSG00000028282	Casp8ap2	-0.918509	0.00119488	0.648909	0.625037	0.491996	0.417961	1.45966	1.44274	1.09084	0.932788
ENSMUSG00000047459	Dynlrb1	-0.881955	0.00119783	1.81071	1.71959	1.3109	1.28807	15.461	15.2384	10.7764	12.4069
ENSMUSG00000115704	Gm49171	-1.45274	0.00120103	0.0102463	0.0151882	0.00634894	0.00617783	0.040368	0.0510324	0.0425793	0.0666631
ENSMUSG00000120995	Gm51425	-1.1569	0.00120489	0.332233	0.256256	0.17858	0.180314	0.509531	0.4512	0.358947	0.418254
ENSMUSG00000080902	Ywhaq-ps3	-1.59775	0.00121175	10.0303	9.17273	5.82783	2.48171	96.9067	82.7877	49.8898	25.2767
ENSMUSG00000037216	Lipt1	-2.05998	0.00121291	0.597008	0.996379	0.340992	0.151043	1.03828	1.73728	0.747281	0.573964
ENSMUSG00000086693	A730081D07Rik	2.41654	0.00121291	0.00911984	0.0153878	0.117257	0.0561008	0.259264	0.355203	0.653289	0.617109
ENSMUSG00000033618	Map3k13	-0.873065	0.00121291	0.206168	0.214883	0.166552	0.143866	1.9322	1.89064	1.34413	1.16946
ENSMUSG00000118353	Nsa2-ps1	-1.68861	0.00122064	6.50115	5.14845	2.88233	1.91325	52.9059	54.4264	35.131	27.9161
ENSMUSG00000021877	Arf4	-0.845689	0.00123532	1.29904	1.30194	1.04705	0.9091	10.6599	10.0439	6.69366	5.7208
ENSMUSG00000030610	Det1	-2.07123	0.00123757	0.0997236	0.113769	0.0304075	0.0395653	0.312769	0.321229	0.101358	0.134522
[truncated: 12,178 more rows]

## Sheet: SLAM_mESC_Gabpa_1h
Table S3. Differentially expressed genes of SLAM-seq in mESCs with GABPA degradation for 1 hours (dTAG vs DMSO).
Gene_id	Gene_name	log2FoldChange	padj	SLAM_mESC_Gabpa_1h_DMSO_rep1_Nascent_RPKM	SLAM_mESC_Gabpa_1h_DMSO_rep2_Nascent_RPKM	SLAM_mESC_Gabpa_1h_dTAG_rep1_Nascent_RPKM	SLAM_mESC_Gabpa_1h_dTAG_rep2_Nascent_RPKM	SLAM_mESC_Gabpa_1h_DMSO_rep1_Total_RPKM	SLAM_mESC_Gabpa_1h_DMSO_rep2_Total_RPKM	SLAM_mESC_Gabpa_1h_dTAG_rep1_Total_RPKM	SLAM_mESC_Gabpa_1h_dTAG_rep2_Total_RPKM
ENSMUSG00000031917	Nip7	-2.12256	2.53435e-31	10.2438	11.6797	2.52869	2.55402	112.754	114.527	84.3106	89.5075
ENSMUSG00000026377	Nifk	-2.36306	1.61598e-16	1.47373	1.45649	0.338863	0.236887	11.6202	11.5364	8.52663	9.05874
ENSMUSG00000107318	Gm30003	-3.33519	2.82372e-09	0.0711605	0.0981232	0.0106971	0.00623163	0.143086	0.195546	0.143073	0.0872428
ENSMUSG00000044763	Trmt10c	-1.41736	9.61451e-08	3.90206	4.38097	1.40274	1.72514	13.0552	15.1547	7.26697	8.74677
ENSMUSG00000020075	Ddx21	-1.49489	5.25707e-07	0.669802	0.729469	0.258059	0.243397	8.78917	8.59904	8.42379	7.69326
ENSMUSG00000025484	Bet1l	-2.46481	8.71448e-07	1.38853	1.78062	0.303308	0.276427	7.19258	7.08431	3.1544	3.2543
ENSMUSG00000024258	Polr2d	-1.40965	5.57608e-06	1.88699	2.08119	0.720071	0.787561	24.2766	22.752	20.3302	19.3545
ENSMUSG00000073775	Kti12	-2.59715	5.65635e-06	2.92442	3.72407	0.560902	0.548627	18.7591	16.8563	10.1586	10.553
ENSMUSG00000022313	Utp23	-2.44769	7.58799e-06	0.792292	0.762754	0.134215	0.153632	5.22266	5.28003	3.27768	3.53354
ENSMUSG00000062101	Zfp119b	-2.29899	7.58799e-06	0.485875	0.693901	0.109557	0.132374	1.46807	1.49308	0.470184	0.576773
ENSMUSG00000014856	Tmem208	-2.84361	7.58799e-06	0.543872	0.492176	0.0687051	0.0770842	8.03358	7.5687	7.19113	6.75376
ENSMUSG00000028187	Rpf1	-1.56196	8.85051e-06	0.705833	0.746262	0.262436	0.234421	7.02829	6.72324	5.39961	5.90469
ENSMUSG00000029649	Pomp	-1.91833	8.85051e-06	0.450357	0.575531	0.145976	0.128175	23.1498	23.8729	20.992	20.6986
ENSMUSG00000027404	Snrpb	-1.14831	9.24408e-06	2.69953	2.58232	1.20877	1.19773	69.8588	65.1882	63.1368	67.3501
ENSMUSG00000110136	Gm45785	-2.01554	1.38178e-05	0.165576	0.212888	0.0477819	0.0467363	1.70134	1.69336	1.19986	1.22339
ENSMUSG00000032215	Rsl24d1	-1.68003	1.43054e-05	0.873669	1.144	0.322768	0.313051	19.0272	19.5931	16.3792	16.8517
ENSMUSG00000027613	Eif6	-1.66104	2.19554e-05	1.39221	1.47028	0.379245	0.533569	41.7826	41.9179	33.7099	38.4244
ENSMUSG00000030264	Thumpd3	-1.67628	2.29559e-05	0.405769	0.487525	0.16576	0.116831	7.18263	7.6942	5.82231	6.23733
ENSMUSG00000021598	Med10	-1.72135	2.66417e-05	0.567824	0.772413	0.211044	0.199396	11.0514	11.2912	9.37849	9.60166
ENSMUSG00000028567	Txndc12	-1.87851	3.48788e-05	0.240598	0.291912	0.0756067	0.0706631	3.00748	3.29996	2.73106	2.38536
ENSMUSG00000063480	Snu13	-1.20266	3.91198e-05	2.26668	2.31697	1.08355	0.928955	40.3157	35.8829	36.6038	39.2539
ENSMUSG00000047084	Ngrn	-2.76893	3.91198e-05	1.06137	0.959405	0.109821	0.18956	8.88199	9.72197	6.39401	7.69615
ENSMUSG00000050213	Snip1	-1.90626	4.13276e-05	0.930041	0.938536	0.275467	0.22823	3.49948	3.43649	2.25194	2.26804
ENSMUSG00000061848	Gm5805	-1.01179	6.05681e-05	51.5985	54.0319	24.4903	28.3609	2021	2090.44	1907.68	1859.14
ENSMUSG00000038335	Tsr1	-1.04268	6.95222e-05	1.77298	1.8223	0.914177	0.848829	13.0242	14.7153	11.3619	11.24
ENSMUSG00000106496	Gm7733	-2.05721	0.000156651	6.25844	5.96425	1.76754	1.20131	89.009	103.187	63.742	68.9893
ENSMUSG00000082044	Snrpert	-1.37284	0.000212984	40.813	39.6728	13.8275	17.5238	1381.19	1275.83	1153.51	1268.87
ENSMUSG00000021024	Psma6	-1.2235	0.000248085	0.366569	0.433704	0.191285	0.155105	12.0764	12.108	10.789	11.5423
ENSMUSG00000102869	Norad	-1.6937	0.000248085	1.38716	1.55058	0.513574	0.404232	12.9782	15.9903	13.3118	11.7653
ENSMUSG00000090733	Rps27	-2.3568	0.000248085	3.75311	4.89767	0.539061	1.16308	13.7785	16.2471	8.6699	11.8169
ENSMUSG00000028729	Ebna1bp2	-2.03877	0.000327969	0.799258	0.701602	0.210961	0.158211	33.9934	34.9047	27.4031	29.2541
ENSMUSG00000105879	Gm6204	-0.848131	0.000335121	61.0199	64.0443	33.767	36.3513	1756.48	1991.2	1661.92	1669.75
ENSMUSG00000005779	Psmb4	-1.54642	0.000335121	2.63245	2.98627	1.00851	0.934521	116.253	112.328	108.795	114.232
ENSMUSG00000038510	Rpf2	-1.64786	0.000378392	0.285706	0.328805	0.0896132	0.108276	4.9962	4.98353	3.91738	4.11229
ENSMUSG00000057895	Zfp105	-2.15007	0.000486218	0.686318	0.508275	0.153108	0.118925	2.11736	1.88597	0.829334	0.931578
ENSMUSG00000044600	Smim7	-1.27493	0.000515554	1.79181	1.89377	0.817209	0.721621	22.1515	23.1942	21.6862	20.4281
ENSMUSG00000046675	Tmem251	-1.70366	0.000587394	1.72759	1.97456	0.454183	0.691729	8.60739	8.22032	4.95594	5.1603
ENSMUSG00000078713	Tomm5	-0.923689	0.000651649	7.25451	6.9196	3.87653	3.67114	111.256	110.018	100.615	96.4804
ENSMUSG00000022247	Brix1	-0.887395	0.000933223	2.28348	3.10647	1.40436	1.53445	39.152	44.3292	31.5141	33.3296
ENSMUSG00000021576	Pdcd6	-1.52942	0.00100469	0.516061	0.510519	0.191186	0.168115	10.3171	10.7474	8.85947	9.54519
ENSMUSG00000024423	Impact	-1.561	0.00125288	0.170691	0.249587	0.0643089	0.0793552	1.60199	1.75141	1.32038	1.39297
ENSMUSG00000020397	Med7	-0.957571	0.00127697	3.37733	3.1303	1.56742	1.81375	14.3912	14.2837	10.5779	11.9526
ENSMUSG00000005846	Rsl1d1	-0.893731	0.00138505	1.95111	1.90017	1.05325	1.04006	40.0707	41.1412	36.2758	37.077
ENSMUSG00000032078	Zpr1	-2.02827	0.00171395	0.454823	0.438829	0.105974	0.11524	11.0674	10.2931	9.15617	10.174
ENSMUSG00000019761	Krt10	-3.03454	0.00183131	0.692461	0.530726	0.0740865	0.0767279	3.13727	3.1973	1.82747	2.03329
ENSMUSG00000019948	Actr6	-1.88338	0.00197208	0.234385	0.230402	0.0599399	0.06725	2.30383	2.57108	1.85064	1.83127
ENSMUSG00000023892	Zfp51	-1.73309	0.00216841	0.381859	0.370763	0.0900857	0.138219	1.26777	1.26619	0.610581	0.794756
ENSMUSG00000037058	Paip2	-0.93289	0.00235827	0.866545	0.962805	0.489275	0.478411	22.1735	25.1561	19.3141	20.3565
ENSMUSG00000014873	Surf2	-2.67133	0.00248116	0.700136	0.752845	0.106391	0.123957	19.1929	18.7375	16.1714	17.4917
ENSMUSG00000047721	Bola2	-2.4415	0.00251214	0.937885	0.629191	0.196214	0.0956279	46.7093	41.0063	43.0169	41.9089
ENSMUSG00000078193	Gm2000	-0.85055	0.00255828	48.5657	61.2272	33.5369	27.9987	2375.8	2879.83	2240.24	2207.29
ENSMUSG00000046909	Tefm	-1.24947	0.00255828	1.63785	2.02291	0.692456	0.860572	8.24207	9.1176	5.92742	6.39692
ENSMUSG00000116024	Gm49527	-1.46736	0.00255828	0.333277	0.298008	0.113245	0.117283	2.63183	2.42767	1.87895	2.0345
ENSMUSG00000021149	Gtpbp4	-0.943499	0.00336033	0.525253	0.554454	0.266152	0.300378	5.7563	6.24923	5.45611	5.74605
ENSMUSG00000022814	Umps	-1.2223	0.00336033	0.914787	0.846612	0.310608	0.450355	19.6324	19.9366	17.0793	18.7819
ENSMUSG00000051469	Zfp24	-1.20997	0.00355843	0.800135	0.938891	0.356414	0.402248	4.10004	4.0334	2.92442	2.92458
ENSMUSG00000048911	Rnf24	-1.05084	0.00355843	0.269135	0.234876	0.109246	0.136153	7.25075	6.68039	6.11039	6.66479
ENSMUSG00000001158	Snrnp27	-1.43831	0.00412785	0.818254	0.698405	0.330395	0.235595	25.7812	25.7217	23.041	22.275
ENSMUSG00000046441	Cmtr2	-2.1903	0.0043332	0.421463	0.367957	0.109326	0.0655504	1.36976	1.01339	0.53512	0.61379
ENSMUSG00000028890	Mtf1	-1.9438	0.00457681	0.0864796	0.0859081	0.0276705	0.0176351	0.93666	0.863543	0.802446	0.706507
ENSMUSG00000026577	Blzf1	-1.8782	0.00469965	0.22332	0.273746	0.0832158	0.0534927	1.47129	1.48906	1.10476	1.11146
ENSMUSG00000069208	Zfp825	-2.94697	0.00489759	0.166715	0.206156	0.00728339	0.0414869	1.30455	1.34383	0.739264	1.03717
ENSMUSG00000050846	Zfp623	-2.53363	0.00526934	0.330052	0.302322	0.048064	0.0622221	1.23082	1.1715	0.757008	0.690665
ENSMUSG00000028409	Smu1	-1.09704	0.00526934	0.48907	0.4878	0.235029	0.226198	12.8055	13.8675	11.3408	11.9467
ENSMUSG00000037296	Lsm1	-1.03905	0.00526934	0.646617	0.637851	0.296073	0.33476	6.91072	7.30112	5.99209	6.42796
ENSMUSG00000046862	Pramel12	-1.49576	0.00533	0.683798	0.681614	0.24016	0.248722	2.48045	2.14923	1.3531	1.37101
ENSMUSG00000072761	Gm6712	-1.84252	0.00539293	0.146488	0.20127	0.0439979	0.0538514	0.64775	0.786212	0.345984	0.366604
ENSMUSG00000059897	Zfp930	-1.29489	0.00593699	0.356699	0.398512	0.184167	0.127155	2.03751	2.26731	1.62917	1.57233
ENSMUSG00000084830	Gm14539	-1.33158	0.00707407	41.0679	42.205	19.2544	14.2003	1868.42	1605.93	1616.2	1719.45
ENSMUSG00000028322	Exosc3	-2.17177	0.0073317	0.117882	0.130389	0.0213774	0.0342157	1.97731	1.78877	1.71991	1.75305
ENSMUSG00000021890	Eaf1	-1.68662	0.00783337	0.266806	0.340769	0.0919356	0.0986139	2.22464	2.39227	2.00945	2.26812
ENSMUSG00000050621	Rps27rt	-0.805132	0.00783337	52.5039	50.0847	28.9097	30.3621	1565.18	1538.82	1367.58	1478.04
ENSMUSG00000113149	Gm49383	-1.21928	0.00795693	0.606567	0.581707	0.298786	0.217344	13.3607	12.9728	11.987	12.2707
ENSMUSG00000047989	Ino80c	-1.92308	0.00796387	0.189183	0.250649	0.0590354	0.0580832	2.31073	2.25275	1.86847	1.97177
ENSMUSG00000021917	Spcs1	-1.64559	0.00854567	2.64216	2.4778	0.769532	0.882357	54.7619	48.5475	47.5461	48.5866
ENSMUSG00000051316	Taf7	-0.772005	0.00898606	5.97542	5.3301	3.40324	3.28394	72.9407	69.0907	58.5795	65.7921
ENSMUSG00000116802	Gm5165	-1.18086	0.00906247	0.250851	0.278772	0.122484	0.113498	0.649262	0.827868	0.417413	0.417273
ENSMUSG00000003923	Tfam	-1.1692	0.00936203	0.752434	0.676761	0.376247	0.26661	7.86883	8.17926	7.14077	6.61603
ENSMUSG00000025208	Mrpl43	-1.52012	0.00936203	3.92346	3.82462	1.82415	0.91202	47.5135	46.2252	41.0119	43.7769
ENSMUSG00000023723	Mrps23	-1.87061	0.00970804	0.636446	0.463389	0.171107	0.132905	8.58386	8.199	7.30768	7.22857
ENSMUSG00000034024	Cct2	-0.753131	0.0098454	1.58229	1.68192	0.966586	0.98874	50.1211	53.5639	47.6638	48.3334
ENSMUSG00000041716	Gm20604	-0.852125	0.0103691	1.00479	1.0523	0.659203	0.49341	8.30581	8.85818	6.96058	6.45157
ENSMUSG00000067722	BC003965	-1.82261	0.0103691	1.08381	1.69453	0.489819	0.30437	17.3223	20.3001	16.3926	16.1147
ENSMUSG00000059486	Kbtbd2	-0.862781	0.0103691	0.710095	0.820912	0.427809	0.422333	2.02148	2.17424	1.60115	1.72302
ENSMUSG00000031711	Zfp330	-1.69726	0.0107037	0.368811	0.448753	0.125052	0.129511	5.40556	5.68756	4.57884	4.88156
ENSMUSG00000020973	Dnaaf2	-1.83009	0.0108159	0.491233	0.415787	0.17386	0.0844024	4.68848	4.27748	3.65105	3.79248
ENSMUSG00000072704	Smim10l1	-1.86812	0.0108707	0.630319	0.586245	0.160987	0.175501	6.06076	6.11116	4.54152	5.04566
ENSMUSG00000079036	Alkbh1	-0.867126	0.0110393	0.783009	0.887015	0.494268	0.430913	7.98989	7.67868	6.66285	6.25836
ENSMUSG00000026499	Acbd3	-1.71091	0.0121866	0.129964	0.173844	0.0432597	0.0504022	0.724086	0.884334	0.63808	0.630961
ENSMUSG00000090553	Snrpe	-1.14917	0.0128204	1.33908	1.28459	0.671973	0.523995	44.8319	36.159	40.0496	42.4681
ENSMUSG00000028932	Psmc2	-0.835293	0.0128697	0.988936	1.1014	0.507479	0.6733	17.4272	19.4513	14.3987	15.3723
ENSMUSG00000005483	Dnajb1	-0.904178	0.0131948	3.13857	2.82716	1.60444	1.6145	21.6835	20.5059	18.5477	17.8538
ENSMUSG00000030615	Tmem126a	-1.64676	0.0140622	0.72064	0.603049	0.217661	0.20932	14.8665	14.4406	13.324	12.8893
ENSMUSG00000038206	Fbxo8	-1.51122	0.014485	0.113887	0.114254	0.039093	0.0417136	0.833817	0.918999	0.73092	0.787651
ENSMUSG00000034259	Exosc4	-1.76517	0.0147415	1.27489	1.11912	0.293956	0.416598	27.1623	25.8371	19.7105	22.1758
ENSMUSG00000032673	Prorsd1	-1.34955	0.0149266	1.71966	2.11106	0.666082	0.850255	13.2254	14.5339	9.65044	10.941
ENSMUSG00000057388	Mrpl18	-0.935806	0.0149267	2.42987	2.33222	1.21901	1.29403	61.2119	57.5919	52.7831	57.9895
ENSMUSG00000024791	Cdca5	-0.806966	0.0149267	2.27425	2.45126	1.3895	1.33846	18.3052	19.0227	15.5833	15.9532
ENSMUSG00000029513	Prkab1	-1.97263	0.0149267	0.276572	0.326413	0.0975917	0.0577549	3.38269	3.24464	3.34135	2.91662
ENSMUSG00000031546	Gins4	-1.36342	0.0149267	0.478698	0.607125	0.202237	0.223728	14.4451	15.3131	12.672	14.3043
ENSMUSG00000098530	Gm28051	-0.830412	0.0153197	0.464264	0.481584	0.315657	0.222577	3.77868	4.07938	3.21029	2.97976
ENSMUSG00000083774	Gm7180	-1.01222	0.0153197	19.2521	28.3191	12.8636	10.9652	238.839	330.597	212.447	211.925
ENSMUSG00000024608	Rps14	-0.813228	0.0172874	0.581903	0.500863	0.342188	0.280836	32.6457	27.292	30.5403	30.2299
ENSMUSG00000008301	Phax	-1.01015	0.0185723	0.390832	0.469606	0.251096	0.180994	4.36812	4.41809	3.58565	3.72806
ENSMUSG00000027245	Hypk	-1.16419	0.0185723	1.46778	1.32469	0.603519	0.654335	70.0218	65.0087	63.5015	59.5249
ENSMUSG00000037938	Chchd5	-2.05956	0.0188725	0.681171	0.611943	0.183131	0.130391	14.0819	11.7949	11.4686	12.7191
ENSMUSG00000024844	Banf1	-0.89081	0.0193454	4.95802	5.02505	2.56716	2.8664	198.275	179.598	187.423	184.633
ENSMUSG00000042684	Npl	-0.532918	0.0219245	2.3359	3.03918	2.1036	1.65211	8.70866	10.2354	8.54715	6.94491
ENSMUSG00000001555	Fkbp10	-1.52404	0.0228827	0.540991	0.530518	0.244688	0.132465	2.56493	2.60595	2.99743	2.02153
ENSMUSG00000022752	Tomm70a	-0.787538	0.0228827	0.429874	0.538186	0.290041	0.276352	7.62985	8.63834	7.60634	7.42545
ENSMUSG00000071662	Polr2g	-0.742736	0.0228827	3.29328	3.89521	2.04872	2.28571	44.9442	47.5821	39.1677	38.8186
ENSMUSG00000027804	Ppid	-1.24553	0.0228827	0.505019	0.531761	0.202073	0.239175	16.1417	16.6964	14.3967	14.7007
ENSMUSG00000030057	Cnbp	-0.414064	0.0244854	14.7908	14.9644	10.9928	11.5457	293.196	310.58	241.249	276.743
ENSMUSG00000062580	Timm17a	-0.692317	0.024569	1.07643	1.10351	0.6972	0.665425	13.3115	14.0304	11.4204	11.2981
ENSMUSG00000060149	BC002059	-1.45769	0.0253413	0.18488	0.237557	0.0762826	0.0790023	0.883317	1.11252	0.666351	0.648284
ENSMUSG00000014859	E2f4	-1.5799	0.0253413	0.520061	0.566117	0.217324	0.150048	16.7927	13.3797	16.9315	15.6869
ENSMUSG00000047710	Champ1	-1.10378	0.0264977	0.643952	0.620894	0.291904	0.302311	4.1639	4.03137	3.469	3.24656
ENSMUSG00000019362	D8Ertd738e	-0.997022	0.0273391	2.7196	2.55224	1.38494	1.28333	88.9627	81.7023	79.6995	83.3714
ENSMUSG00000030037	Mrpl53	-1.8635	0.027788	4.06672	2.95639	1.01523	0.934603	120.904	108.736	102.82	108.998
ENSMUSG00000025439	Clns1a	-1.04467	0.027788	0.319777	0.392016	0.174366	0.174056	10.9566	11.4808	9.83174	10.7044
ENSMUSG00000070697	Utp3	-0.956159	0.0292538	6.77609	5.78211	3.17844	3.35631	58.8807	56.2204	51.416	47.9242
ENSMUSG00000041278	Ttc1	-1.07553	0.0358446	0.420872	0.394143	0.203079	0.187582	6.69626	6.68892	5.70818	5.96001
ENSMUSG00000036398	Ppp1r11	-1.5576	0.0421496	1.09809	1.163	0.434757	0.341574	28.5161	28.2734	25.8006	25.8044
ENSMUSG00000016559	H3f3b	-0.451361	0.042441	24.838	31.0267	19.5043	21.6767	274.475	345.234	241.602	254.847
ENSMUSG00000075486	Commd6	-1.32813	0.0435147	0.557891	0.89083	0.303015	0.279708	13.9473	14.274	12.338	12.3549
ENSMUSG00000003198	Zfp959	-1.50071	0.0444715	0.569403	0.817375	0.178215	0.315305	1.91217	2.49105	1.06929	1.26891
ENSMUSG00000003131	Pafah1b2	-1.13361	0.0445311	0.129408	0.135622	0.0672312	0.0548586	0.955987	0.982457	0.860763	0.915717
ENSMUSG00000039771	Polr2j	-1.12812	0.0471557	0.974859	1.17095	0.458036	0.532622	25.6682	25.7609	22.8777	23.4187
ENSMUSG00000030127	Cops7a	-1.26501	0.0471557	0.766353	0.716902	0.313431	0.309851	34.013	26.8017	30.6308	34.4304
ENSMUSG00000037262	Kin	-1.60911	0.0501306	0.285391	0.287555	0.108056	0.0817797	1.7171	1.62948	1.16784	1.11909
ENSMUSG00000032330	Cox7a2	-0.929391	0.0507968	2.31458	1.95522	1.12354	1.14033	107.525	93.8035	102.624	106.749
ENSMUSG00000027079	Clp1	-0.794139	0.052032	2.75699	3.03245	1.44149	1.92371	18.9557	19.2394	14.0182	16.3014
ENSMUSG00000028889	Yrdc	-1.12944	0.0521495	1.26019	1.65568	0.689575	0.656567	16.6625	14.3298	14.837	14.2026
ENSMUSG00000000600	Krit1	-1.48315	0.0521495	0.0863607	0.0991951	0.0335368	0.0334921	0.899248	1.08612	0.740206	0.774039
ENSMUSG00000033669	Zfp7	-1.30745	0.052516	0.389164	0.352417	0.154561	0.148066	2.67551	2.3373	1.77745	1.78479
ENSMUSG00000079511	Gm42688	-1.6737	0.0526813	0.495593	0.32608	0.140276	0.120012	13.4369	12.0138	11.3197	11.9443
ENSMUSG00000027076	Timm10	-1.14529	0.0526816	2.02262	2.00156	0.788959	1.04587	21.3819	17.7659	15.3531	18.5642
ENSMUSG00000036873	2410004B18Rik	-1.32924	0.0526816	0.656308	0.897847	0.253212	0.370221	6.27328	5.80087	4.57272	5.20624
ENSMUSG00000026036	Nif3l1	-0.836996	0.0548096	0.29788	0.403474	0.213203	0.183525	5.07822	5.33805	4.50633	4.60104
ENSMUSG00000020522	Mfap3	-2.01635	0.0567533	0.126529	0.200188	0.0469022	0.034696	1.06591	1.09226	1.09885	0.884749
ENSMUSG00000104082	Gm7115	-0.570032	0.0567533	1.27713	1.63513	1.13321	0.850871	5.00766	5.73367	4.61469	3.70993
ENSMUSG00000084786	Ubl5	-1.83404	0.0567533	0.695027	0.586701	0.19052	0.172648	33.8655	25.9022	32.6741	33.7157
ENSMUSG00000038880	Mrps34	-1.44703	0.0583271	1.94708	1.49368	0.680508	0.594649	56.1246	52.5462	47.8057	49.1357
ENSMUSG00000036372	Tmem258	-1.23988	0.059616	1.32625	1.36843	0.57275	0.579375	68.95	61.1742	65.5332	66.6558
ENSMUSG00000007656	Arpp19	-0.875038	0.0596277	0.424843	0.450101	0.25269	0.229276	15.668	14.8885	14.5151	14.1503
ENSMUSG00000087621	1700003G18Rik	-0.655751	0.0599161	2.27778	2.72586	1.91452	1.30034	12.7138	14.7729	12.0392	9.03319
ENSMUSG00000082935	Gm7658	-0.976606	0.0602223	7.33954	7.10165	3.47744	3.92882	227.526	250.357	193.427	226.749
ENSMUSG00000030603	Psmc4	-0.864179	0.0610712	1.14185	1.30581	0.713504	0.64501	64.1998	65.9689	53.7063	60.5745
ENSMUSG00000033970	Rfc3	-1.23016	0.0626901	0.657149	0.677179	0.358866	0.216802	9.11109	8.69674	7.05172	8.23848
ENSMUSG00000005354	Txn2	-1.18282	0.0636675	0.407838	0.381196	0.185447	0.165698	19.597	18.2593	18.4647	18.9611
ENSMUSG00000029918	Mrps33	-1.09282	0.0636675	0.796963	0.648893	0.370281	0.314799	17.8874	15.8168	15.0544	14.9501
ENSMUSG00000030641	Ddias	-0.823321	0.0658385	0.625324	0.684161	0.376394	0.370952	1.8586	1.98884	1.61789	1.49009
ENSMUSG00000092072	Gm4540	-1.15121	0.0667366	17.7403	12.5285	6.15292	7.59773	600.732	522.971	519.685	555.983
ENSMUSG00000020737	Jpt1	-0.485493	0.0684756	2.8204	2.96455	2.32726	1.85165	22.0652	23.7664	20.8231	20.2601
ENSMUSG00000083705	Gm8624	-2.05724	0.0717622	2.84837	1.82142	0.845244	0.291793	11.286	11.9131	10.6595	8.89969
ENSMUSG00000010054	Tusc2	-2.27597	0.0717622	0.609826	0.688928	0.14209	0.128761	10.3264	7.98784	8.34778	8.35109
ENSMUSG00000060510	Zfp266	-1.18876	0.072019	0.224888	0.189837	0.102101	0.0817999	1.39342	1.22384	1.05761	1.15916
ENSMUSG00000028478	Clta	-0.882789	0.0720789	0.421475	0.314848	0.210948	0.192549	6.86022	6.01023	6.51079	6.26525
ENSMUSG00000021737	Psmd6	-1.15218	0.0722393	0.60661	0.658318	0.282297	0.292362	26.3941	25.0282	22.0192	25.346
ENSMUSG00000035293	G2e3	-1.33272	0.0723629	0.132557	0.17845	0.0684403	0.0563408	1.14481	1.30618	1.02485	1.01959
ENSMUSG00000026021	Sumo1	-0.554583	0.0746985	0.296419	0.324555	0.218039	0.208971	6.69355	7.26144	5.89128	6.0196
ENSMUSG00000047539	Fbxo28	-1.22861	0.0752318	0.164953	0.179075	0.0782919	0.0700264	0.983609	0.988641	0.845196	0.807147
ENSMUSG00000026755	Arpc5l	-1.03935	0.0785635	0.59034	0.667083	0.313343	0.304545	11.8509	12.9222	10.7453	10.8288
ENSMUSG00000071180	Smim15	-1.1551	0.0787828	1.09383	1.28337	0.612103	0.467104	14.269	14.4661	11.2219	11.4774
ENSMUSG00000024742	Fen1	-0.718594	0.0788172	2.88289	2.83081	1.93454	1.57568	29.4978	31.741	27.3657	26.7031
ENSMUSG00000041645	Ddx24	-1.23416	0.0806483	0.358035	0.301121	0.0995381	0.182611	6.84498	5.90914	5.78174	6.44441
ENSMUSG00000030879	Mrpl17	-0.763048	0.0818152	1.61909	1.46958	0.932409	0.905715	42.0523	45.0379	37.9072	36.8146
ENSMUSG00000113786	Gm49384	-1.24727	0.0821314	0.346265	0.331925	0.172383	0.116591	3.53513	3.23812	3.12049	3.12244
ENSMUSG00000021891	Mettl6	-1.67132	0.0832961	0.129926	0.136366	0.0378412	0.0465385	2.47672	2.45955	1.86368	2.11873
ENSMUSG00000072582	Ptrh2	-0.914337	0.0836817	0.946212	1.03629	0.503243	0.558412	7.75483	7.44244	5.90711	6.42174
ENSMUSG00000065990	Aurkaip1	-1.15145	0.0843171	3.25013	2.89119	1.66566	1.13118	116.411	114.417	106.001	109.696
ENSMUSG00000022427	Tomm22	-1.04722	0.0844921	2.26437	2.97501	1.319	1.24184	56.7695	51.6437	51.9008	56.2142
ENSMUSG00000003039	Fam32a	-1.01486	0.0844921	1.51156	1.37322	0.746972	0.695122	30.5286	29.0872	27.6704	28.5897
ENSMUSG00000033430	Terf2ip	-1.53255	0.0861647	0.3563	0.384645	0.161219	0.0978769	3.29578	3.77068	2.96865	3.06297
ENSMUSG00000080893	Ndufa12-ps	-1.22919	0.0862517	10.8388	12.9728	5.556	4.70789	499.308	608.001	470.618	432.733
ENSMUSG00000021040	Slirp	-0.992738	0.0896237	0.838831	0.857997	0.482513	0.379531	42.0394	40.2362	40.2502	37.5609
ENSMUSG00000037601	Nme1	-0.725925	0.0899667	1.08713	1.13871	0.703618	0.655833	55.3329	60.1625	51.5708	54.2338
ENSMUSG00000051232	Tmem199	-0.847323	0.0962507	1.95243	2.47463	1.04142	1.43806	12.4637	14.4527	8.59912	10.313
ENSMUSG00000024360	Etf1	-0.548301	0.0962507	0.813102	0.934172	0.61665	0.590063	13.0733	14.1528	13.0035	12.8483
ENSMUSG00000027305	Ndufaf1	-1.37213	0.0962507	0.487938	0.533448	0.206292	0.192282	6.79965	7.01412	4.92351	6.16016
ENSMUSG00000070319	Eif3g	-1.20291	0.0962507	1.18231	1.09542	0.569955	0.430409	77.8691	70.4181	68.8458	75.9242
ENSMUSG00000002728	Naa20	-0.79344	0.105667	0.750176	0.839436	0.407453	0.517385	11.2851	11.3584	9.29702	9.75325
ENSMUSG00000028033	Kcnq5	-0.872284	0.105706	0.0152575	0.0148255	0.00819695	0.0083959	0.460818	0.506616	0.393994	0.459256
ENSMUSG00000033931	Rbm34	-0.817713	0.107338	0.420528	0.414142	0.267614	0.211166	4.04485	3.76958	3.7296	3.6536
ENSMUSG00000054226	Tprkb	-1.41876	0.108045	0.173468	0.205118	0.0716505	0.071351	3.2202	3.03921	2.75028	3.29356
ENSMUSG00000023286	Ube2j2	-1.16227	0.108284	0.371986	0.333985	0.202738	0.116648	4.87264	4.50374	4.74663	4.28263
ENSMUSG00000089782	Btf3-ps1	-0.891872	0.108922	15.5636	17.8472	8.82359	9.3532	508.251	496.347	448.135	523.671
ENSMUSG00000029840	Mtpn	-0.985413	0.109243	0.217511	0.221565	0.101579	0.122168	5.57278	5.59408	4.91183	5.17688
ENSMUSG00000035171	1110059E24Rik	-0.921181	0.109302	0.0987491	0.121592	0.0551641	0.062258	1.3323	1.3946	1.11743	1.21367
ENSMUSG00000029687	Ezh2	-0.466978	0.109302	0.695873	0.818592	0.611914	0.495858	6.26553	7.14779	6.53098	5.62859
ENSMUSG00000030059	Tmf1	-0.681474	0.110596	0.531461	0.549952	0.326416	0.354152	3.75581	3.61135	2.97855	3.44694
ENSMUSG00000028419	Chmp5	-1.12063	0.110615	0.302566	0.308639	0.150209	0.133785	6.18884	5.54605	5.07706	5.45097
ENSMUSG00000021276	Cinp	-1.29351	0.11209	0.231878	0.270323	0.0890231	0.117631	7.04418	6.45235	6.29609	6.71131
ENSMUSG00000009549	Srp14	-1.28755	0.11209	0.932666	1.19878	0.460035	0.421987	45.9564	42.7567	42.0209	41.9128
ENSMUSG00000027531	Impa1	-1.30997	0.11209	0.196794	0.207572	0.0755536	0.0890401	4.32053	4.64034	4.00955	4.44391
ENSMUSG00000022204	Ngdn	-0.99247	0.116024	0.715831	0.882423	0.473479	0.339014	15.2398	16.8947	13.5205	13.5364
ENSMUSG00000084067	Gm14269	-1.00078	0.116024	18.9856	22.7816	10.9486	10.1363	524.383	733.88	450.053	484.482
ENSMUSG00000026335	Pam	-0.809806	0.116717	0.0295764	0.0348826	0.0184107	0.0187172	0.876854	0.857721	0.78997	0.907173
ENSMUSG00000036751	Cox6b1	-0.867895	0.116717	0.837894	0.95078	0.491717	0.497932	67.019	59.1774	64.6827	64.3973
ENSMUSG00000006392	Med8	-1.52502	0.11901	0.441624	0.577886	0.236247	0.122335	16.1148	16.5853	12.6471	12.7228
ENSMUSG00000031948	Kars	-0.973502	0.123219	0.389885	0.345224	0.195881	0.182284	26.4179	25.737	24.7719	26.7047
ENSMUSG00000085385	Snhg17	-0.858322	0.125716	0.980306	1.21526	0.6569	0.566934	4.2308	4.01712	3.4133	3.24153
ENSMUSG00000020910	Adprm	-1.84273	0.126949	0.126554	0.173882	0.0380107	0.0465234	1.55424	1.63739	1.07467	1.25613
ENSMUSG00000063412	Gm10131	-0.652619	0.126949	21.3913	29.9334	15.794	17.1429	526.18	682.251	475.821	521.214
ENSMUSG00000021681	Aggf1	-1.19365	0.12948	0.174265	0.181194	0.0802474	0.0767155	2.35493	2.55613	2.18931	2.23753
ENSMUSG00000031818	Cox4i1	-0.692363	0.129853	2.009	2.39139	1.42465	1.32614	147.861	145.048	151.132	164.213
ENSMUSG00000091780	Sco2	-1.79543	0.135736	0.920073	1.08356	0.321567	0.261668	10.41	11.7988	10.9333	8.75397
ENSMUSG00000078784	Rbis	-1.31924	0.136063	0.685259	0.797906	0.274003	0.325812	13.0315	11.16	11.5386	11.3614
ENSMUSG00000053205	Styx	-0.787116	0.136567	0.132022	0.157283	0.0962466	0.0732927	2.24518	2.36592	1.90512	1.90854
ENSMUSG00000046991	Wdr27	-0.443235	0.136567	0.599885	0.784307	0.570987	0.45806	2.95048	3.60047	2.92458	2.56235
ENSMUSG00000033285	Wdr3	-1.05206	0.136567	0.232595	0.217446	0.117329	0.101984	3.20118	3.42643	2.92904	2.98356
ENSMUSG00000015133	Lrrk1	-2.04881	0.136567	0.00719728	0.0191185	0.00282989	0.00358207	0.0233911	0.0527407	0.0188659	0.0237719
ENSMUSG00000009630	Ppp2cb	-0.989188	0.136567	0.296094	0.397428	0.207483	0.145906	3.98115	4.92219	4.4135	3.8705
ENSMUSG00000024414	Mrpl27	-1.68412	0.13782	0.468591	0.479718	0.0722528	0.224486	7.16668	7.423	6.54289	6.74291
ENSMUSG00000028848	Gpn2	-1.73429	0.140296	0.283626	0.339179	0.0963741	0.0926808	4.64831	4.03406	4.35749	3.78565
ENSMUSG00000068134	Zfp120	-1.4026	0.141644	0.135452	0.15509	0.059176	0.0518572	0.466269	0.477201	0.414232	0.365358
ENSMUSG00000001569	Nom1	-1.52814	0.143312	0.100252	0.153814	0.0481775	0.0408234	1.53135	1.60242	1.4081	1.15893
ENSMUSG00000081113	Gm7308	-0.741619	0.143591	22.7445	30.1195	15.4442	16.4653	337.399	469.173	276.293	311.077
ENSMUSG00000078941	Ak6	-0.633614	0.14441	0.966946	1.0068	0.610552	0.673335	12.6496	12.7805	11.0229	11.6825
ENSMUSG00000033543	Gtf2a2	-0.991591	0.145335	0.585634	0.727277	0.408376	0.259876	16.0881	14.0658	14.2981	15.2868
ENSMUSG00000004789	Dlst	-1.48372	0.147732	0.101613	0.155126	0.0422784	0.0503537	2.28629	2.34241	2.29361	2.26154
ENSMUSG00000025995	Wdr75	-0.938851	0.148651	0.220509	0.246868	0.135583	0.110856	5.36164	5.47598	4.46711	4.86656
ENSMUSG00000010376	Nedd8	-0.876918	0.155089	0.765817	0.771623	0.478689	0.367819	33.2895	31.5772	31.9486	31.3445
ENSMUSG00000022354	Ndufb9	-1.23466	0.155089	0.567483	1.04889	0.354171	0.339289	41.2945	44.8239	41.987	40.2011
ENSMUSG00000013822	Elof1	-1.11177	0.155089	1.22191	1.08109	0.497425	0.577984	30.6865	30.8301	26.2301	27.1652
ENSMUSG00000068457	Uty	1.4529	0.155089	0.0066329	0.00893475	0.0259094	0.0173003	0.0557944	0.0693337	0.0750009	0.057197
ENSMUSG00000012422	Tmem167	-0.699369	0.156197	0.203604	0.235065	0.147323	0.125707	2.77516	2.84021	2.42388	2.68495
ENSMUSG00000031617	Tmem184c	-1.70587	0.161207	0.161849	0.144636	0.0448394	0.0500102	1.85929	2.29609	1.77633	1.71821
ENSMUSG00000033933	Vhl	0.97366	0.167124	0.370906	0.443747	0.899489	0.719218	4.13296	3.61238	4.49083	4.93178
ENSMUSG00000099647	Gm5776	-1.72002	0.171046	6.33446	7.29427	2.2139	1.96529	224.24	286.797	199.409	210.777
ENSMUSG00000009145	Dqx1	-0.40376	0.178146	5.65938	6.34087	5.01455	4.15578	30.2222	32.7883	30.2641	26.7379
ENSMUSG00000021621	Zcchc9	-1.52458	0.178238	0.259984	0.214327	0.0817783	0.0846939	2.82343	2.60526	2.19438	2.68197
ENSMUSG00000018848	Rars	-1.01653	0.178545	0.215698	0.258681	0.0913188	0.14488	6.33751	6.2776	5.38587	5.69057
ENSMUSG00002075524	Gm55094	0.574302	0.178545	289.461	220.329	373.142	392.902	500.441	382.775	681.274	598.576
ENSMUSG00000015290	Ubl4a	-1.3939	0.179765	0.402746	0.40438	0.148881	0.161198	14.4524	14.3449	12.6549	12.3842
ENSMUSG00000044715	Gskip	-1.75048	0.180515	0.153262	0.0935906	0.0306885	0.04334	1.27399	1.24008	1.09084	1.10084
ENSMUSG00000029560	Snx8	-0.640839	0.180515	0.27171	0.299962	0.204232	0.16642	0.695292	0.689043	0.607514	0.545427
ENSMUSG00000059820	Nkapd1	-1.06123	0.180515	0.356418	0.500591	0.195157	0.219316	3.98712	4.22673	3.52528	3.77568
ENSMUSG00000036450	Hif1an	-1.50373	0.184399	0.199063	0.202158	0.060498	0.0822346	1.42373	1.35168	1.27424	1.2531
ENSMUSG00000037151	Lrrc20	-0.703819	0.187386	0.100455	0.111413	0.0735394	0.0579808	0.607616	0.698817	0.634336	0.50119
ENSMUSG00000018446	C1qbp	-0.560805	0.187386	3.62611	3.53673	2.31757	2.58249	78.5209	70.1913	74.6316	79.3382
ENSMUSG00000037361	Sf3b6	-1.05882	0.188074	0.430724	0.557611	0.255916	0.223465	13.8119	13.1249	11.8323	12.5764
ENSMUSG00000042729	Wdr74	-0.930838	0.191022	1.25927	1.35311	0.782901	0.602632	37.4149	38.6302	31.2949	34.8431
ENSMUSG00000074731	Zfp345	-1.55632	0.191022	0.14008	0.2453	0.0575977	0.0745641	0.659199	0.875533	0.478781	0.492123
ENSMUSG00000061024	Rrs1	-0.749553	0.192964	5.47487	4.88497	3.66832	2.56696	29.0197	25.5422	27.6363	24.4118
ENSMUSG00000024953	Prdx5	-1.78877	0.202702	0.545183	0.593012	0.178633	0.154168	25.1125	23.8921	24.0113	24.5899
ENSMUSG00000041231	Ublcp1	-1.88529	0.203753	0.102128	0.123616	0.0286825	0.0330057	2.22492	2.33868	2.15756	2.11566
ENSMUSG00000018761	Mpdu1	-1.08524	0.205465	0.664402	0.921821	0.392707	0.3625	12.3696	12.995	14.846	13.4832
ENSMUSG00000038393	Txnip	0.509335	0.205465	3.86124	3.98401	5.99781	5.28793	10.9624	9.40444	15.8477	14.4849
ENSMUSG00000021018	Polr2h	-1.10407	0.207914	0.997086	0.890193	0.441118	0.445424	18.1243	16.3934	16.2	18.0225
ENSMUSG00000064354	mt-Co2	1.16914	0.207914	3.14262	2.72299	5.12069	8.14703	12.7404	9.88057	16.5495	30.0518
ENSMUSG00000104413	Gm37065	-1.52345	0.208935	0.197564	0.412826	0.102494	0.111735	0.493909	1.03489	0.285905	0.564263
ENSMUSG00000039182	AW209491	-1.10367	0.208935	0.493716	0.464136	0.232721	0.217504	3.34557	3.68929	2.85509	2.76289
ENSMUSG00000022407	Adsl	-1.04162	0.208935	0.209546	0.222746	0.0971968	0.114708	7.75839	7.57337	6.87611	7.70651
ENSMUSG00000074797	Itpa	-1.53319	0.208935	0.224005	0.281179	0.0362453	0.138889	5.86146	6.13274	5.0816	5.80331
ENSMUSG00000074088	Snrnp40	-0.599162	0.208935	0.466401	0.494858	0.324317	0.316536	9.18227	9.03917	7.78192	8.43042
ENSMUSG00000031916	Cog8	-1.13913	0.208935	0.580905	0.480936	0.151294	0.333594	8.35609	7.57218	7.15475	7.75859
ENSMUSG00000032288	Imp3	-1.16841	0.208935	4.33834	5.18328	1.59317	2.67409	49.0421	42.906	42.1365	49.7835
ENSMUSG00000113047	Gm47469	-1.42985	0.20916	0.170699	0.288027	0.0824243	0.0894279	1.0781	1.12742	0.808543	0.800786
ENSMUSG00000039841	Zfp800	-1.20439	0.20916	0.027931	0.0205348	0.0105968	0.0106421	0.158766	0.115466	0.109179	0.120388
ENSMUSG00000091449	Gm10269	-0.991267	0.209378	15.0736	18.4095	6.4481	10.5143	916.347	1181.37	906.163	919.289
ENSMUSG00000038268	Ovca2	-1.35427	0.20972	1.28478	0.882626	0.438507	0.41781	17.5452	16.5125	15.2074	16.0766
ENSMUSG00000052949	Rnf157	-0.411056	0.20972	0.60763	0.666923	0.539524	0.429868	2.65857	3.2666	2.47652	2.41946
ENSMUSG00000001767	Crnkl1	-1.60281	0.20972	0.135831	0.121385	0.0405259	0.0449687	3.29639	2.9891	2.91787	2.92896
ENSMUSG00000028016	Ints12	-1.02588	0.20972	0.23361	0.283458	0.124591	0.131779	1.76573	2.05368	1.57462	1.55114
ENSMUSG00000036845	Lin37	-1.87983	0.20972	0.356661	0.459793	0.0923358	0.131488	5.41596	5.68692	4.42058	4.66186
ENSMUSG00000001774	Chordc1	-0.858934	0.20972	0.245528	0.321585	0.166412	0.149504	4.57325	4.64302	3.65103	4.04284
ENSMUSG00000074884	Serf2	-0.802999	0.211276	0.917407	0.805316	0.495425	0.501559	41.8376	38.801	38.7434	36.3889
ENSMUSG00000110230	Gm45846	-1.3942	0.211276	0.0184825	0.0250098	0.0102767	0.00646191	0.155421	0.152367	0.138369	0.117075
ENSMUSG00000070610	Gm13127	-1.74591	0.213715	1.54756	1.3026	0.365454	0.492029	49.4381	50.2267	47.3994	48.5595
ENSMUSG00000105143	Gm8069	-1.22743	0.213715	19.9941	26.6075	10.5479	9.55844	285.953	362.484	263.697	293.922
ENSMUSG00000032112	Trappc4	-1.05438	0.213715	1.04195	1.40434	0.624278	0.565719	34.2801	35.2176	28.6648	31.1819
ENSMUSG00000020088	Sar1a	-0.882209	0.213841	0.49162	0.511722	0.249923	0.299276	9.92625	10.5742	9.86023	9.83565
ENSMUSG00000062198	2700097O09Rik	-0.984297	0.213841	0.146716	0.177641	0.0987236	0.0671449	2.53633	2.78047	2.38852	2.65375
ENSMUSG00000033475	Tomm6	-0.776838	0.213841	4.93867	5.16562	2.59494	3.35177	310.068	259.289	285.443	288.343
ENSMUSG00000079444	Gm21981	-0.776838	0.213841	1.11419	1.16539	0.585433	0.756178	69.8929	58.4489	64.2792	65.0586
ENSMUSG00000049305	Ccdc71	-1.39905	0.213841	0.66555	0.462141	0.16883	0.262274	5.12044	5.17204	4.22075	4.75979
ENSMUSG00000006050	Sra1	-1.08566	0.214182	0.941339	1.18399	0.515596	0.495837	33.9022	36.8966	29.5608	31.1996
ENSMUSG00000029265	Dr1	-1.02564	0.21837	0.504532	0.480445	0.322989	0.167252	4.18611	4.10437	3.31718	3.48065
ENSMUSG00000026078	Pdcl3	-0.851814	0.21861	0.634356	0.549033	0.322961	0.338995	11.9329	11.2918	10.1995	10.6535
ENSMUSG00000041360	Pum3	-0.960276	0.21861	0.117243	0.160442	0.0777568	0.0664684	4.00745	4.27242	3.53608	3.68388
ENSMUSG00000036721	Zscan12	-1.66181	0.220366	0.23312	0.224773	0.0964846	0.0499623	1.46007	1.44417	1.01845	0.810499
ENSMUSG00000031774	Psme3ip1	-1.06825	0.220366	0.170993	0.148987	0.072881	0.0811404	3.0466	3.08288	2.60914	2.99842
ENSMUSG00000039067	Psmd7	-0.455952	0.227126	3.29144	3.55469	2.44264	2.59475	71.1325	73.1805	65.5116	69.9738
ENSMUSG00000081070	Gm13181	-1.40038	0.22714	2.55427	2.83747	1.32958	0.737672	59.4547	73.1271	50.3342	56.604
ENSMUSG00000110277	Gm45871	-1.12488	0.232203	0.323465	0.296288	0.155246	0.131923	1.07062	1.14342	0.780213	0.663739
ENSMUSG00000018326	Ywhab	-0.796784	0.232483	0.304876	0.33106	0.180455	0.189114	8.85369	8.70889	8.43413	8.40333
ENSMUSG00000078931	Pdf	-1.27985	0.236634	1.08272	0.93741	0.246227	0.590539	16.3298	15.4876	14.3071	15.609
ENSMUSG00000043024	Gm16433	-1.03717	0.240685	2.10832	2.44081	1.12576	1.1129	33.294	39.0261	28.7325	33.6256
ENSMUSG00000084106	Gm6136	-0.852635	0.241932	6.71593	10.5116	4.67166	4.95623	339.774	381.344	296.537	369.062
ENSMUSG00000015671	Psma2	-0.540639	0.245822	0.295257	0.266961	0.196399	0.19392	6.84615	6.95057	6.21652	6.31664
ENSMUSG00000013701	Timm23	-1.16375	0.245822	0.168379	0.164025	0.0723932	0.0773927	1.29358	1.59128	1.13727	1.29149
ENSMUSG00000066798	Zbtb6	-1.29446	0.245822	0.19396	0.162608	0.0603211	0.0862704	0.585168	0.526971	0.29586	0.362931
ENSMUSG00000004096	Cwc15	-1.17582	0.245822	0.408265	0.373964	0.132497	0.216387	12.1021	10.6259	10.1819	11.1466
ENSMUSG00000039016	Timm8b	-0.971037	0.245822	3.25272	4.14858	1.79878	2.01195	116.645	106.091	105.876	104.547
ENSMUSG00000091537	Tma7	-1.25756	0.245822	0.369439	0.46447	0.215199	0.137656	13.93	12.9322	12.7917	12.5595
ENSMUSG00000025340	Rabgef1	-0.837924	0.24721	0.161131	0.150095	0.0918708	0.0840253	5.08793	6.06385	4.81666	4.46323
ENSMUSG00000005481	Ddx39a	-0.436092	0.247651	2.48431	2.94327	2.11868	1.93396	77.1523	82.466	64.3662	73.1764
ENSMUSG00000074305	Peak1	0.466168	0.247651	0.094264	0.0821742	0.120737	0.125284	0.316534	0.24824	0.406201	0.446128
ENSMUSG00000028719	Cmpk1	-0.95925	0.247979	0.170712	0.196415	0.0945891	0.0960776	2.39621	2.82418	2.31016	2.29644
ENSMUSG00000026848	Tor1b	-1.52184	0.248303	0.354888	0.395357	0.142471	0.121512	2.39789	2.91685	2.49743	2.06571
ENSMUSG00000000538	Tom1l2	-0.37886	0.24997	0.372446	0.413687	0.329448	0.281621	1.14036	1.24739	1.10098	0.986506
ENSMUSG00000012640	Zfp715	-0.861598	0.252804	0.356772	0.473078	0.195945	0.264425	0.98537	1.17647	0.721434	0.8025
ENSMUSG00000117924	Tmem223	-1.42468	0.265483	2.11972	1.40229	0.685968	0.639382	31.4425	31.4616	26.4098	25.7174
ENSMUSG00000021597	Slf1	-0.980796	0.267859	0.047163	0.0576007	0.028022	0.0256068	0.210033	0.261507	0.188462	0.165022
ENSMUSG00000048100	Taf13	-0.799787	0.267859	0.630109	0.669516	0.440448	0.314744	8.45354	9.12389	7.00312	6.98823
ENSMUSG00000024926	Kat5	-1.21618	0.272367	0.442315	0.670344	0.161616	0.320202	5.31582	5.45115	4.15987	5.04319
ENSMUSG00000027998	Plrg1	-0.954448	0.280272	0.269187	0.3256	0.153787	0.156147	6.88497	7.22958	5.9434	6.40513
ENSMUSG00000029388	Eif2b1	-0.861664	0.285113	0.716511	0.704044	0.466695	0.324187	20.0884	19.3374	16.6246	17.2468
ENSMUSG00000005505	Kbtbd4	-1.16138	0.291353	0.565186	0.448159	0.22849	0.229003	7.51613	7.07782	6.50828	6.43498
ENSMUSG00000039539	Sgcz	-0.463902	0.29317	0.0287112	0.0405462	0.0278045	0.0229352	0.173134	0.2188	0.178502	0.144441
ENSMUSG00000024273	2700062C07Rik	-1.07024	0.298155	0.509981	0.650925	0.262976	0.295048	4.79048	4.64071	3.76201	3.98692
ENSMUSG00000027080	Med19	-0.973587	0.298543	0.550533	0.444633	0.232757	0.278552	8.77301	8.78422	8.66889	8.56549
ENSMUSG00000096458	Moap1	-1.19431	0.298657	2.10963	2.45265	1.13434	0.881085	14.8891	16.4996	12.1232	13.3998
ENSMUSG00000059058	Tma7-ps	-1.58717	0.30062	8.63993	12.5533	4.16506	2.96557	716.518	872.18	672.136	676.688
ENSMUSG00000004100	Ppan	-1.15745	0.30062	0.827042	0.903752	0.456398	0.328243	13.9727	13.7025	12.9566	12.3157
ENSMUSG00000001285	Myg1	-1.60541	0.305818	0.28908	0.314441	0.110506	0.0899216	8.50076	8.77125	7.02501	7.815
ENSMUSG00000026926	Pmpca	-1.01806	0.310708	0.634399	0.499062	0.260851	0.30392	20.1291	19.4087	18.6052	19.7345
ENSMUSG00000019505	Ubb	-0.378363	0.311653	40.4369	55.8458	36.5494	38.1355	796.596	1011.79	716.427	736.54
ENSMUSG00000004562	Arhgef40	-0.59893	0.312016	0.555788	0.627716	0.438474	0.351567	2.58199	2.92852	2.65442	2.09231
ENSMUSG00000020372	Rack1	-0.398387	0.314692	5.24511	5.29273	4.05062	4.02275	271.489	269.354	282.711	276.571
ENSMUSG00000011958	Bnip2	-1.42202	0.316698	0.104778	0.149607	0.0484675	0.0474069	2.08631	2.27516	1.92254	2.09427
ENSMUSG00000075701	Selenos	-0.852541	0.317893	0.541841	0.687208	0.358978	0.328672	4.18587	5.49767	4.4326	3.52919
ENSMUSG00000020691	Mettl2	-1.14844	0.322853	0.21209	0.29712	0.134444	0.0978423	2.64905	2.38839	2.26374	2.4009
ENSMUSG00000039166	Akap7	-0.518777	0.329671	0.115957	0.134206	0.0837608	0.0924293	0.452106	0.476623	0.457941	0.423508
ENSMUSG00000035086	Becn1	-1.31514	0.329671	0.142262	0.198722	0.0839035	0.0547116	4.1327	4.12429	3.84713	3.81694
ENSMUSG00000038563	Efl1	-1.35699	0.329671	0.0229257	0.0189408	0.0058916	0.0105762	0.211726	0.197231	0.166536	0.164338
ENSMUSG00000022024	Sugt1	-0.746449	0.333098	0.172432	0.241958	0.100442	0.148288	6.0131	6.6404	5.50827	5.64048
ENSMUSG00000081712	Gm12096	-0.614196	0.335317	9.39403	12.0178	7.29096	6.83856	42.6667	50.0904	33.5659	35.3325
ENSMUSG00000091931	Gon7	-0.63195	0.335317	2.28331	2.32647	1.62518	1.38132	15.9831	16.8258	14.5369	12.9078
ENSMUSG00000019373	Cops3	-0.544812	0.337262	0.706303	0.8256	0.472062	0.586671	10.9029	11.1722	9.10043	10.1332
ENSMUSG00000022035	Ccdc25	-1.05586	0.340481	0.124891	0.132556	0.0640886	0.0609919	2.42645	2.52765	2.16689	2.33563
ENSMUSG00000021131	Erh	-0.576479	0.340589	1.14841	1.40772	0.880458	0.85072	17.1811	22.2142	15.1891	16.8361
ENSMUSG00000021951	Eef1akmt1	-0.795562	0.343825	0.274436	0.328726	0.193676	0.1576	3.1956	3.50722	3.07346	3.18303
ENSMUSG00000027170	Eif3m	-1.01068	0.343825	0.210046	0.268747	0.122352	0.117663	5.78127	4.74889	4.75426	5.15305
ENSMUSG00000028082	Sh3d19	-0.527989	0.345107	0.132651	0.194944	0.132144	0.0976122	0.736869	0.866232	0.786812	0.621618
ENSMUSG00000018923	Med11	-1.14584	0.348477	1.83056	1.73559	0.813757	0.813709	23.3476	22.445	20.2317	23.9754
ENSMUSG00000014771	Pdcd2	-1.19325	0.348477	0.409127	0.341881	0.169331	0.162378	6.07231	4.72058	5.33078	5.81312
ENSMUSG00000036513	Commd2	-0.82613	0.348477	0.788599	0.809024	0.482328	0.428164	10.5514	11.5575	9.5501	9.41247
ENSMUSG00000031590	Frg1	-0.774356	0.350646	0.352438	0.36352	0.186319	0.235842	9.38552	9.8476	8.11265	8.55465
ENSMUSG00000068706	Gm10250	-0.982797	0.350874	8.31666	9.27399	4.73915	4.2537	524.311	529.169	475.916	526.478
ENSMUSG00000039756	Dnttip2	-0.591596	0.350874	1.20099	1.89704	1.10067	0.975691	18.1217	20.3834	15.638	16.5288
ENSMUSG00000039068	Zzz3	-0.629175	0.350874	0.144046	0.161966	0.106265	0.0936629	0.949665	1.00261	0.942068	0.867162
ENSMUSG00000020022	Ndufa12	-0.897596	0.354014	0.227537	0.25994	0.16307	0.101793	9.08614	8.80984	8.94873	7.60671
ENSMUSG00000003429	Rps11	-0.568982	0.354014	5.91954	6.27426	4.06388	4.23428	281.516	239.713	251.912	267.984
ENSMUSG00000021645	Smn1	-1.15111	0.356386	0.226248	0.269412	0.110704	0.114651	4.29872	3.56038	4.41629	4.09876
ENSMUSG00000024007	Ppil1	-0.751211	0.356386	0.655447	0.532786	0.307209	0.404577	18.7779	15.9319	16.5059	19.1172
ENSMUSG00000047213	Ythdf3	-0.675526	0.356386	0.249037	0.273737	0.18008	0.150755	1.72093	2.07348	1.75278	1.77797
ENSMUSG00000082321	Gm14253	-0.837703	0.357962	8.27346	10.6597	4.84579	5.84127	108.737	135.328	84.841	89.5113
ENSMUSG00000105078	Vamp9	-0.565025	0.359792	0.313549	0.410634	0.285286	0.209868	1.15573	1.29124	1.09812	0.811334
ENSMUSG00000004535	Tax1bp1	-0.694156	0.362235	0.143455	0.197605	0.112906	0.100085	3.96309	4.1778	3.59576	3.58423
ENSMUSG00000078789	Dph1	-1.14849	0.363406	0.294774	0.203484	0.130646	0.0966457	3.69535	3.37705	3.16537	3.33621
ENSMUSG00000003746	Man1a	-0.703171	0.366966	0.0517311	0.0637992	0.0443139	0.0275363	0.125778	0.142774	0.116103	0.0838328
ENSMUSG00000051518	Rps19bp1	-0.619192	0.366966	2.91972	2.68879	1.79675	1.88922	33.875	31.7622	27.8839	29.1621
ENSMUSG00000024841	Eif1ad	-0.799728	0.366966	1.20174	1.37874	0.806077	0.692018	21.5341	22.4602	19.9716	22.2105
ENSMUSG00000085793	Lin52	-0.454117	0.366987	0.215275	0.241008	0.179523	0.157064	0.651345	0.743248	0.653785	0.565541
ENSMUSG00000031984	2810004N23Rik	-0.71095	0.370508	0.295185	0.290715	0.174532	0.18678	8.99095	8.42056	8.31159	8.45931
ENSMUSG00000040824	Snrpd2	-1.18277	0.371618	0.745016	0.807765	0.318838	0.371481	48.5325	47.5189	47.3075	46.1049
ENSMUSG00000037017	Zscan21	-0.926847	0.371977	0.244256	0.294226	0.134483	0.151389	2.40241	2.38752	1.93247	1.88328
ENSMUSG00000030929	Eri2	-1.31503	0.377609	0.0869838	0.10903	0.0360011	0.0434988	0.714183	0.698211	0.576018	0.627626
ENSMUSG00000021519	Mterf3	-0.798996	0.387456	0.249101	0.22206	0.126316	0.146921	1.78374	1.75204	1.7315	1.86368
ENSMUSG00000039233	Tbce	-0.992427	0.394091	0.0947597	0.131474	0.0426159	0.0718774	1.10088	1.20369	1.00695	0.987369
ENSMUSG00000032002	Dcun1d5	-0.991485	0.394091	0.166788	0.175242	0.100726	0.073244	3.94404	3.37902	3.56399	3.52681
ENSMUSG00000036822	Topors	-0.381369	0.394673	3.02099	3.05792	2.42665	2.2875	10.4119	10.1083	9.95423	8.9038
ENSMUSG00000027810	Eif2a	-0.593083	0.3952	0.333748	0.346021	0.224318	0.230656	5.37115	5.62704	4.82124	4.92344
ENSMUSG00000038722	Bud31	-0.619876	0.395511	1.33251	1.3171	0.973528	0.769803	22.058	22.3218	21.2334	20.7847
ENSMUSG00000027131	Emc4	-1.29432	0.395633	0.463194	0.593989	0.161887	0.272445	12.3673	15.0088	11.8683	11.7466
ENSMUSG00000049680	Urgcp	-0.481645	0.399038	0.364287	0.468457	0.323481	0.279178	1.84873	1.93361	1.81854	1.58702
ENSMUSG00000015126	Tsr3	-1.63103	0.399816	0.773435	0.769179	0.405475	0.0999837	20.5071	18.8854	18.6905	17.2772
ENSMUSG00000107596	Gm18913	-1.56072	0.402372	1.13659	0.89237	0.312117	0.382017	28.0251	29.5672	23.3237	27.2995
ENSMUSG00000057561	Eif1a	-0.329179	0.405419	2.52753	2.64429	2.1489	2.00969	16.9524	17.9767	15.432	16.3718
ENSMUSG00000008475	Arpc5	-0.673488	0.410547	0.866052	1.01071	0.661426	0.528268	19.9384	22.2474	17.1802	17.7521
ENSMUSG00000095432	Zfp748	-0.809513	0.410547	0.367164	0.374852	0.230583	0.197273	1.0709	1.15258	0.838786	0.723333
ENSMUSG00000022771	Ppil2	-1.16816	0.410547	0.103478	0.13356	0.0554817	0.0510753	2.8386	2.75737	2.76997	2.83255
ENSMUSG00000105617	Gm43809	-0.621511	0.410547	0.0901572	0.0937285	0.0652432	0.055557	1.95082	1.95158	1.97614	1.7508
ENSMUSG00000041124	Msantd4	-0.825695	0.410547	0.512828	0.634926	0.280669	0.372268	3.54471	3.51532	3.05289	2.87105
ENSMUSG00000024146	Cript	-0.884431	0.414508	0.46427	0.456381	0.247352	0.256171	7.98318	7.67031	7.07427	6.85001
ENSMUSG00000020801	Med31	-0.996532	0.416921	1.03609	1.08658	0.419843	0.652217	11.8024	10.8108	8.97414	10.2588
ENSMUSG00000052253	Zfp622	-0.950616	0.416921	0.304556	0.369444	0.22655	0.126624	2.5023	2.52579	2.36979	1.68336
ENSMUSG00000027879	Sec22b	-0.824994	0.416921	0.223578	0.272255	0.147088	0.135671	4.67409	4.84518	4.17593	4.64614
ENSMUSG00000028798	Eif3i	-0.908955	0.416921	0.528207	0.508326	0.303787	0.254114	32.9828	29.3727	29.7653	32.9562
ENSMUSG00000029617	Ccz1	-0.953735	0.417625	0.133559	0.18548	0.0884644	0.0779731	2.65395	2.60461	2.3396	2.28851
ENSMUSG00000072258	Taf1a	-1.17681	0.420885	0.12632	0.146562	0.0686763	0.0533436	1.01898	1.03108	0.816758	0.899221
ENSMUSG00000021114	Atp6v1d	-0.75578	0.420885	0.288897	0.361315	0.174755	0.213664	6.87241	7.02273	5.9247	6.41746
ENSMUSG00000024855	Pacs1	-0.995863	0.420885	0.0618476	0.0250939	0.0192221	0.0247904	0.191769	0.209876	0.182791	0.133342
ENSMUSG00000027406	Idh3b	-1.61976	0.420885	0.343764	0.284409	0.11627	0.0903116	25.6603	24.1037	23.2347	25.7187
ENSMUSG00000039617	Gm7488	-0.806341	0.420885	7.38941	9.49157	4.74962	4.99582	281.647	256.506	244.012	283.225
ENSMUSG00000086136	Gm12718	-0.418626	0.420885	0.238662	0.301196	0.221507	0.186691	1.16096	1.38064	1.18399	1.02224
ENSMUSG00000029522	Pla2g1b	-0.402008	0.420885	3.74902	4.81772	3.56369	2.98864	52.5755	60.0579	49.2437	44.2331
ENSMUSG00000058748	Zfp958	-0.619927	0.420885	0.524277	0.623674	0.365876	0.388163	1.95412	2.06748	1.54382	1.61118
ENSMUSG00000031513	Leprotl1	-1.62215	0.420885	0.187537	0.116068	0.0398582	0.0596256	2.47347	2.2703	2.24092	2.19239
ENSMUSG00000020745	Pafah1b1	-0.36078	0.425655	0.743353	0.90122	0.669522	0.62395	4.71668	5.57309	4.9959	4.54799
ENSMUSG00000115916	Gm8702	-0.711534	0.42711	17.5468	18.5037	12.1106	10.1407	118.994	136.009	100.493	106.744
ENSMUSG00000021911	Parg	-1.00714	0.427915	0.0388919	0.0372943	0.0207078	0.0175968	0.368258	0.357914	0.307961	0.342037
ENSMUSG00000113204	Gm46430	-1.25154	0.434583	0.0556908	0.0772071	0.0249876	0.0313266	0.897074	0.892018	0.674665	0.758648
ENSMUSG00000029147	Ppm1g	-0.818984	0.435285	0.28687	0.298198	0.174613	0.160421	7.72293	7.60257	8.32508	7.42895
ENSMUSG00000031429	Psmd10	-1.01806	0.436432	0.454969	0.474447	0.17736	0.285026	10.1563	11.3931	8.24418	9.18416
ENSMUSG00000001707	Eef1e1	-0.405548	0.440486	1.89716	1.99574	1.35688	1.60702	16.6989	15.7545	14.0883	15.0437
ENSMUSG00000083692	Gm9575	-1.13391	0.441149	2.08261	2.26531	1.09939	0.903019	79.7465	82.6641	65.7361	77.1885
ENSMUSG00000028233	Tgs1	-0.797781	0.442225	0.121077	0.149147	0.0814715	0.0755608	1.07578	1.10395	0.989818	1.01755
ENSMUSG00000031485	Plpbp	-0.805591	0.442225	0.415033	0.431113	0.209357	0.27877	6.49077	6.41574	5.51432	6.222
ENSMUSG00000033918	Parl	-0.900755	0.445853	0.169887	0.252282	0.123699	0.104817	5.16352	5.81192	4.79503	4.98928
ENSMUSG00000039128	Cdc123	-0.754704	0.445853	0.111919	0.140174	0.0828215	0.0682061	4.54413	4.97828	4.16004	4.1461
ENSMUSG00000025747	Tyms	-0.783446	0.447263	0.335401	0.4453	0.246959	0.211431	7.75946	7.85315	7.09925	7.04203
ENSMUSG00000019143	Hars2	-1.40981	0.448779	0.200646	0.211635	0.0796886	0.0770277	3.14345	3.53653	2.45972	2.81151
ENSMUSG00000078498	Zfp988	-0.57416	0.448879	0.366452	0.43807	0.258683	0.286641	1.02482	1.18905	0.882779	0.946102
ENSMUSG00000036639	Nudt1	-1.01509	0.448879	0.193865	0.232465	0.107794	0.105258	6.47157	6.68336	5.76543	6.42391
ENSMUSG00000026020	Nop58	-0.363709	0.449114	0.920698	0.99171	0.750832	0.74983	13.1012	13.4388	12.3783	12.0852
ENSMUSG00000021532	Fastkd3	-0.578308	0.450054	0.98312	1.22703	0.798723	0.697137	6.54263	6.49323	5.68651	5.89965
ENSMUSG00000037458	Azin1	-0.535829	0.450054	0.394119	0.379391	0.266243	0.272434	2.39573	2.55211	2.49982	2.42713
ENSMUSG00000040331	Nsmce4a	-0.531851	0.454325	0.377833	0.397215	0.32513	0.217574	3.87565	4.23172	3.82653	3.23901
ENSMUSG00000097565	Gm26965	-0.908374	0.460372	0.107893	0.150522	0.0638146	0.075102	0.423271	0.418118	0.30602	0.313926
ENSMUSG00000048175	Asb8	0.741098	0.461229	0.159352	0.109902	0.242432	0.212057	1.18671	0.918714	1.30717	1.41993
ENSMUSG00000071528	Atp5md	-1.38779	0.461553	0.307301	0.251853	0.105989	0.109768	12.1707	8.39262	10.9451	10.8524
ENSMUSG00000028693	Nasp	-0.430821	0.461553	0.756178	0.934083	0.6626	0.604112	15.6464	16.4335	15.64	15.4469
ENSMUSG00000032459	Mrps22	-0.930958	0.461553	0.305509	0.312763	0.164874	0.162621	5.93495	5.78612	4.7892	5.0372
ENSMUSG00000078503	Zfp990	-0.581709	0.461962	0.33513	0.413666	0.249969	0.255183	1.40183	1.72579	1.19628	1.48857
ENSMUSG00000040112	Mrps35	-0.92608	0.461962	0.132087	0.126102	0.0698972	0.0673388	3.18498	2.6311	2.765	3.12789
ENSMUSG00000066979	Bub3	-0.450208	0.461962	1.59249	1.62736	1.1262	1.25191	21.5285	23.1021	19.802	20.7737
ENSMUSG00000016319	Slc25a5	-0.365503	0.461962	9.67961	10.2654	7.70187	7.92651	349.588	370.971	313.285	325.087
ENSMUSG00000091228	Gm20390	-0.410556	0.466673	1.20123	1.20688	0.945169	0.884964	53.354	52.7599	51.5447	52.6112
ENSMUSG00000008668	Rps18	-0.599956	0.46953	2.71396	2.5657	2.06699	1.45776	100.315	101.658	100.002	102.28
ENSMUSG00000071645	Tut1	-1.4447	0.472948	0.126868	0.176465	0.061584	0.0510237	1.44253	1.37299	1.3179	1.16504
ENSMUSG00000118563	Gm53031	-1.37081	0.472948	0.0552659	0.0257554	0.0203321	0.0114059	0.100836	0.116343	0.0923416	0.0666805
ENSMUSG00000027018	Hat1	-0.400653	0.472948	0.439044	0.508253	0.366266	0.358362	11.6192	12.3577	10.5398	11.1072
ENSMUSG00000081792	Anp32b-ps1	-1.0923	0.472948	6.59137	3.1592	2.54478	2.08066	58.5559	50.126	60.338	56.0392
ENSMUSG00000106918	Mrpl33	-0.70647	0.472948	0.106804	0.12071	0.0857943	0.0553383	2.89834	2.91677	2.96141	2.58765
ENSMUSG00000037958	Nsrp1	-0.681857	0.477376	0.217792	0.260277	0.126369	0.173986	1.5841	1.44477	1.16111	1.19634
ENSMUSG00000079179	Rab10os	-1.01974	0.477376	0.209958	0.252862	0.13589	0.0949959	3.81034	4.00662	4.45039	3.73299
ENSMUSG00000021243	Fcf1	-0.974329	0.477376	0.262221	0.343129	0.175929	0.135592	8.3583	7.35154	7.16399	7.60161
ENSMUSG00000021840	Mapk1ip1l	-0.800305	0.477376	0.216646	0.200578	0.128232	0.113832	2.17345	2.37066	2.18198	2.36518
ENSMUSG00000116347	Gm49416	-0.833053	0.477376	0.682182	1.10618	0.555784	0.458811	42.3413	38.0409	39.662	38.2815
ENSMUSG00000038525	Armc10	-1.15073	0.477376	0.151417	0.170217	0.0841918	0.062281	4.17086	4.39098	3.88785	3.79291
ENSMUSG00000061461	Smim20	-0.942318	0.477376	0.354924	0.352971	0.225942	0.146822	5.48612	5.65218	5.16122	5.22594
ENSMUSG00000038646	Ramac	-0.812413	0.477376	0.831587	0.729306	0.432869	0.464313	8.07701	8.52478	6.47757	7.14882
ENSMUSG00000019303	Psmc3ip	-1.37374	0.478418	0.482258	0.618437	0.210687	0.218199	19.9012	21.1446	16.4758	18.6778
ENSMUSG00000042229	Rabif	-0.60874	0.482077	0.612749	0.629073	0.416815	0.405626	5.29679	4.84047	4.71432	5.35501
ENSMUSG00000022314	Rad21	-0.424161	0.482077	0.665462	0.715954	0.552205	0.488158	6.68022	7.27856	6.77957	6.58657
ENSMUSG00000038544	Inip	-0.599226	0.482077	0.303635	0.281455	0.187459	0.202369	1.59454	1.40561	1.30427	1.30141
ENSMUSG00000028651	Ppie	-0.920168	0.482077	0.362054	0.277745	0.181899	0.159717	12.0383	13.34	10.471	10.7666
ENSMUSG00000023104	Rfc2	-0.992705	0.482077	0.164852	0.174433	0.0794702	0.0925915	10.7836	10.8851	9.56871	10.2365
ENSMUSG00000063047	Zfp780b	-1.09127	0.482077	0.136274	0.156694	0.0760018	0.0629692	0.652374	0.642713	0.57508	0.52212
ENSMUSG00000054648	Zfp869	-0.428522	0.482077	1.32589	1.53391	1.06285	1.0824	4.5494	4.88027	4.03882	4.08742
ENSMUSG00000032263	Bckdhb	-0.663125	0.482077	0.0353077	0.0478437	0.0293205	0.0237646	0.466295	0.467746	0.428589	0.433043
ENSMUSG00000071369	Map3k5	-0.763574	0.484656	0.0284508	0.0275935	0.0192535	0.0141347	0.103762	0.0942777	0.0787202	0.0784979
ENSMUSG00000049751	Rpl36al	-0.820756	0.490952	3.64979	3.50047	1.98844	2.09819	110.009	103.913	101.035	106.775
ENSMUSG00000071267	Zfp942	-1.05775	0.490952	0.0752688	0.151379	0.0414614	0.0681111	0.513791	0.630996	0.464654	0.411628
ENSMUSG00000027940	Tpm3	-0.611462	0.490952	0.306375	0.32772	0.23356	0.186067	7.80947	7.22868	7.34996	7.72179
ENSMUSG00000035202	Lars2	0.46883	0.490952	0.140173	0.122282	0.202537	0.164732	23.6268	14.6572	28.8552	27.3032
ENSMUSG00000086691	Gm15432	-0.838489	0.490952	23.5364	31.6561	12.4952	18.6022	286.309	297.458	248.602	246.412
ENSMUSG00000029613	Eif2ak1	-1.27998	0.49353	0.0619245	0.0538858	0.024348	0.0238152	2.33765	2.47733	2.18997	2.19941
ENSMUSG00000028821	Syf2	-0.676252	0.494596	1.02199	1.08014	0.656367	0.671864	10.9885	10.7614	9.74629	9.70646
ENSMUSG00000007050	Lsm2	-0.699472	0.494979	2.13355	1.54495	1.25959	1.03056	46.5922	38.5182	39.7402	43.0094
ENSMUSG00000038005	Hpf1	-0.878692	0.494979	0.241881	0.239051	0.114015	0.14976	8.61543	8.8303	8.12008	8.69758
ENSMUSG00000037722	Gnpnat1	-0.662524	0.498822	0.282553	0.24578	0.184717	0.152674	3.92931	3.86731	3.24675	3.50047
ENSMUSG00000064344	mt-Tm	-0.536746	0.500858	234.068	374.819	250.865	173.714	756.933	1183.07	818.071	620.19
ENSMUSG00000035835	Plppr3	-0.356126	0.502282	3.08122	3.50633	2.97185	2.23503	22.7953	21.7821	24.5061	21.7006
ENSMUSG00000024081	Cebpz	-0.60248	0.502282	0.476065	0.659995	0.418774	0.337649	15.1376	15.778	13.8842	14.0707
ENSMUSG00000096740	Lbhd1	-0.816387	0.502282	0.483263	0.819521	0.41084	0.336845	34.057	30.9922	32.211	31.2025
ENSMUSG00000029389	Ddx55	-1.3384	0.504359	0.124514	0.123557	0.0362648	0.0625962	1.15867	0.915588	0.76156	0.942073
ENSMUSG00000044894	Uqcrq	-0.576557	0.508098	3.43386	3.30994	2.51191	2.0595	163.288	163.504	158.791	151.951
ENSMUSG00000084957	Bbip1	-1.3137	0.510959	0.141631	0.144146	0.0446875	0.0712012	2.4628	2.74237	2.41313	2.3532
ENSMUSG00000081929	Rps11-ps2	-0.633663	0.511572	17.7091	17.1548	10.6867	11.99	433.937	525.848	427.578	450.892
ENSMUSG00000032869	Psmf1	-1.03625	0.511572	0.098277	0.120027	0.0518797	0.0555821	2.11091	2.04421	1.91776	1.94908
ENSMUSG00000000339	Rtca	-1.03468	0.511572	0.153949	0.171429	0.092313	0.0682888	3.1484	3.07191	2.71664	3.06753
ENSMUSG00000012405	Rpl15	-0.579486	0.511753	2.49053	3.29519	1.92009	1.98855	32.7675	31.431	27.9623	29.2391
ENSMUSG00000022404	Slc25a17	-0.982516	0.512414	0.0845749	0.0927091	0.0339202	0.0564582	1.7525	1.78687	1.47432	1.69124
ENSMUSG00000027429	Sec23b	-0.486047	0.512414	0.452705	0.56574	0.424962	0.310668	4.24769	3.96943	3.96141	3.7204
ENSMUSG00000026553	Copa	-0.928683	0.51264	0.0817391	0.113644	0.0548402	0.0488705	1.96174	1.82767	1.78805	1.85312
ENSMUSG00000067608	Pcna-ps2	-0.450168	0.51264	21.7953	24.1205	15.729	18.1745	252.617	297.486	232.879	243.74
ENSMUSG00000052293	Taf9	-0.583083	0.516921	2.03505	2.08966	1.33643	1.44272	21.1023	21.0865	17.2263	19.5413
ENSMUSG00000004264	Phb2	-0.611863	0.516921	2.03934	1.72963	1.34191	1.15053	119.327	100.953	113.897	119.131
ENSMUSG00000085827	Gm11290	-0.656619	0.518708	1.13024	1.4426	0.95517	0.69581	4.52095	4.70118	4.50063	3.5545
ENSMUSG00000025413	Ttc4	-0.986471	0.518708	0.229753	0.181752	0.118623	0.0913518	4.59157	4.53104	3.79594	4.39119
ENSMUSG00000022538	Lsg1	-0.653803	0.5194	0.295851	0.255284	0.191066	0.162958	4.02185	4.48515	3.5497	4.03127
ENSMUSG00000021139	Gm20498	-0.665218	0.519766	0.0373853	0.0449456	0.027999	0.0244664	0.558109	0.561973	0.533439	0.537657
ENSMUSG00000040385	Ppp1ca	-0.575595	0.521028	3.46222	2.69564	2.05709	2.11476	212.805	204.884	193.169	207.936
ENSMUSG00000039328	Rnf122	-0.96126	0.5234	0.200912	0.1705	0.080029	0.112292	2.01798	1.74018	1.598	1.33414
ENSMUSG00000061371	Zfp873	-1.09413	0.524541	0.146787	0.188876	0.0732887	0.0853894	0.67452	0.755504	0.513021	0.57875
ENSMUSG00000034083	Ccdc174	-0.738758	0.529845	0.325259	0.244206	0.156075	0.188177	1.71161	1.62886	1.35343	1.50059
ENSMUSG00000117232	1600002D24Rik	-1.15308	0.532439	0.0235702	0.0154213	0.0132393	0.00457045	0.104719	0.106716	0.0938521	0.0463139
ENSMUSG00000028869	Gnl2	-1.02163	0.532439	0.0838586	0.0740698	0.0392527	0.0392971	2.52175	2.52112	2.04114	2.23181
ENSMUSG00000000171	Sdhd	-0.58074	0.532439	1.3402	1.26329	0.789746	0.965971	36.9178	33.1952	31.3992	38.8433
ENSMUSG00000035919	Bbs9	-0.600921	0.534366	0.0221082	0.0348261	0.0217779	0.016183	0.112935	0.149494	0.12796	0.112899
ENSMUSG00000057101	Zfp180	-0.713686	0.534428	0.214003	0.257925	0.141715	0.148806	0.628492	0.736633	0.574734	0.564648
ENSMUSG00000111897	Gm19810	-1.64083	0.538563	42.1254	15.6889	11.5275	7.33068	925.371	769.604	890.856	925.341
ENSMUSG00000021569	Trip13	-0.713799	0.539745	0.257101	0.211346	0.157442	0.13124	4.08066	4.15849	3.58661	3.88947
ENSMUSG00000090101	Snhg9	0.86879	0.545858	4.86212	4.68201	9.25909	8.34825	40.393	26.8359	48.1473	49.6382
ENSMUSG00000016427	Ndufa1	-0.882934	0.545858	1.10473	1.08632	0.581998	0.617449	57.0238	58.1407	55.0343	50.6897
ENSMUSG00000052337	Immt	-0.56046	0.547899	0.232092	0.256497	0.199484	0.135829	8.73623	8.55798	7.95844	8.58118
ENSMUSG00000063334	Krr1	-0.701099	0.548138	0.438419	0.39821	0.222116	0.296712	5.02892	5.11261	4.71595	5.33082
ENSMUSG00000001056	Nhp2	-0.411534	0.548138	4.70023	5.38835	4.01756	3.64566	157.677	154.431	148.969	149.089
ENSMUSG00000030224	Strap	-0.402438	0.548138	1.20294	1.47127	1.04204	1.00121	28.4466	27.1995	26.7918	27.1544
ENSMUSG00000031781	Ciapin1	-0.319908	0.548138	2.02264	2.22554	1.7454	1.69147	23.2603	22.7946	20.5864	21.4366
ENSMUSG00000074269	Rec114	-0.444615	0.548138	0.193197	0.203247	0.167135	0.127512	1.20317	1.27672	1.13262	0.943937
ENSMUSG00000053985	Zfp14	-0.482756	0.549707	0.912706	1.25758	0.841409	0.727923	3.55027	4.41392	3.55487	2.88019
ENSMUSG00000027835	Pdcd10	-0.542472	0.551545	0.241785	0.270247	0.189883	0.165397	1.81195	2.0117	1.75673	1.6696
ENSMUSG00000040429	Mterf1a	-1.5184	0.551545	0.381185	0.587222	0.121113	0.219505	1.26484	1.9045	0.756958	1.1132
ENSMUSG00000029591	Ung	0.604714	0.551545	0.63699	0.583472	1.01092	0.864623	11.8623	9.56775	13.5735	12.6811
ENSMUSG00000072692	Rpl37rt	-0.37067	0.551545	4.13616	3.53511	3.08882	2.90553	118.549	105.785	112.4	113.129
ENSMUSG00000049891	Gm7984	-0.746004	0.551545	9.61069	11.9684	7.64255	5.3744	139.949	173.493	119.828	128.79
ENSMUSG00000020720	Psmd12	-0.367143	0.552715	1.04381	1.22776	0.873265	0.9044	15.7389	16.9876	13.5989	15.1572
ENSMUSG00000097333	Zfp87	-0.973162	0.553863	0.262625	0.404346	0.165999	0.176974	0.905219	0.926413	0.624939	0.606768
ENSMUSG00000049653	Spatc1	-0.861228	0.553863	0.182707	0.38905	0.211472	0.107359	0.67388	0.660732	0.659296	0.455201
ENSMUSG00000026248	Mrpl44	-0.780512	0.555347	0.866946	0.911753	0.542405	0.503632	8.02727	7.97049	6.60238	7.48668
ENSMUSG00000024810	Il33	-0.394801	0.561898	0.652673	0.666589	0.567424	0.447385	1.8438	2.09393	1.85197	1.68175
ENSMUSG00000091561	Gm6665	1.576	0.566969	0.971211	1.05136	1.15718	4.87364	23.1325	25.4753	22.9122	24.6079
ENSMUSG00000006736	Tspan31	-1.08149	0.567757	0.797969	0.980511	0.408134	0.440297	23.1606	27.6326	26.1035	25.3259
ENSMUSG00000020993	Trappc6b	-0.631308	0.567757	0.398243	0.39084	0.25407	0.260269	2.61386	2.61718	2.62908	2.77715
ENSMUSG00000079605	Zbtb9	-1.05021	0.567757	0.0973493	0.0816135	0.0302753	0.0567371	0.382797	0.400511	0.389254	0.323999
ENSMUSG00000014504	Srp19	-0.6641	0.567757	1.35318	1.26724	0.67941	0.986913	27.3868	22.7642	23.9382	25.8608
ENSMUSG00000028292	Rars2	-1.15948	0.567757	0.0462599	0.0682681	0.0190871	0.0325584	1.533	1.71612	1.38325	1.52443
ENSMUSG00000028416	Bag1	-1.20699	0.567757	0.175797	0.192338	0.0725349	0.0883776	17.106	16.4158	16.0729	13.4467
ENSMUSG00000038346	Zfp384	-1.15494	0.567757	0.0667399	0.11856	0.0512458	0.0329418	0.388305	0.400141	0.381693	0.382491
ENSMUSG00000120796	ENSMUSG00000120796	-0.481854	0.568898	13.9372	14.2892	8.503	11.8595	63.2797	60.9643	51.9153	55.9788
ENSMUSG00000057649	Brd9	-1.41868	0.572459	0.0704652	0.0714605	0.0285857	0.0250503	2.00071	2.05391	1.87786	1.92659
ENSMUSG00000038812	Trmt112	-1.30476	0.574514	1.41802	1.37761	0.638275	0.505494	46.3221	38.022	40.7369	40.5951
ENSMUSG00000099895	Gm28153	-0.530262	0.584718	0.170163	0.206146	0.152677	0.110933	0.939556	1.11202	0.915265	0.831996
ENSMUSG00000038010	Ccdc138	-0.443838	0.589834	0.270087	0.326914	0.267108	0.177259	1.55968	1.6672	1.51189	1.19247
ENSMUSG00000040296	Rigi	-0.500692	0.589911	0.389928	0.317318	0.243559	0.260991	21.09	20.9297	20.6124	16.8536
ENSMUSG00000032309	Fbxo22	-0.717472	0.589911	0.37085	0.363711	0.25857	0.193215	9.039	7.65165	8.23497	8.16248
ENSMUSG00000105471	A430073D23Rik	-0.679245	0.594701	0.0594854	0.0771459	0.0380811	0.0479661	0.380471	0.39598	0.357139	0.338428
ENSMUSG00000063804	Lin28b	-0.491983	0.594814	0.127543	0.129916	0.109129	0.0761446	0.506467	0.531782	0.489231	0.404668
ENSMUSG00000021486	Prelid1	-0.913629	0.596979	0.839855	0.668951	0.457312	0.352459	39.9479	33.9827	40.7752	37.8783
ENSMUSG00000029917	Qrfprl	-1.3146	0.599376	0.0271456	0.0207207	0.00988272	0.00955273	0.66205	0.694836	0.551456	0.643445
ENSMUSG00000003868	Ruvbl2	-0.501553	0.599376	0.743226	1.01303	0.56861	0.682202	25.7248	25.228	23.0458	24.437
ENSMUSG00000019814	Ltv1	-0.805565	0.604665	0.258995	0.357623	0.199277	0.15741	6.30479	6.22831	5.46492	6.00256
ENSMUSG00000020180	Snrpd3	-0.46749	0.604665	0.632784	0.729892	0.494024	0.501034	28.5192	27.4783	24.7652	26.401
ENSMUSG00000042148	Cox10	-0.465743	0.604665	0.109388	0.121148	0.089496	0.0791887	0.586718	0.564751	0.556526	0.506178
ENSMUSG00000018733	Pex12	-1.11622	0.604665	0.285179	0.314802	0.140561	0.138955	2.09862	2.05626	1.71868	1.56821
ENSMUSG00000002477	Snrpd1	-0.567951	0.604665	0.48762	0.396294	0.252712	0.348241	9.1596	7.12015	7.63983	8.83364
ENSMUSG00000074698	Csnk2a1	-0.503676	0.604665	0.217541	0.203133	0.164241	0.135695	1.01378	0.944084	1.11832	0.931711
ENSMUSG00000068917	Clk2	-0.671859	0.604665	0.483854	0.535354	0.347424	0.29912	2.93666	3.23845	2.95101	2.51434
ENSMUSG00000031862	Atp13a1	-1.06745	0.604665	0.143603	0.234201	0.122413	0.0602193	1.74075	1.95702	2.22486	1.7939
ENSMUSG00000019796	Lrp11	-0.653761	0.606021	0.22793	0.241588	0.194887	0.107547	1.15267	1.37049	1.34714	1.00623
ENSMUSG00000030738	Eif3c	-0.697581	0.606596	0.267818	0.301313	0.180592	0.173859	14.9978	13.8471	14.0378	14.2222
ENSMUSG00000094942	Gm3604	-1.18609	0.61193	0.133015	0.157674	0.0581109	0.0708032	0.727668	0.734618	0.505907	0.545185
ENSMUSG00000066148	Prpf4	-0.682763	0.613886	0.34486	0.479678	0.323642	0.196485	3.90202	3.8696	3.94509	3.99328
ENSMUSG00000026095	Asnsd1	-0.966467	0.617572	0.371312	0.37936	0.180935	0.206771	9.48988	8.9215	8.77223	9.20775
ENSMUSG00000008333	Snrpb2	-0.665238	0.617572	0.615587	0.650617	0.382716	0.423142	16.2598	14.0533	14.1295	15.4367
ENSMUSG00000032905	Atg12	-0.738257	0.620387	0.568922	0.45133	0.248549	0.367729	4.85615	4.65288	4.10549	4.58742
ENSMUSG00000013150	Gfod2	-0.436161	0.620387	0.372086	0.447704	0.3489	0.263966	1.7619	1.85019	1.98579	1.5486
ENSMUSG00000019923	Zwint	-0.503562	0.622429	0.565946	0.78553	0.444038	0.517353	9.79721	10.3388	8.48213	8.92564
ENSMUSG00000042472	Zfp410	-0.880575	0.622429	0.140527	0.148524	0.0623375	0.0958618	2.07764	2.17835	1.90602	1.81159
ENSMUSG00000036356	Csgalnact1	-1.18593	0.623124	0.00598824	0.00590706	0.00348816	0.00180626	0.0723195	0.0797453	0.06869	0.0628024
ENSMUSG00000026127	Imp4	-0.587076	0.623212	0.977842	0.794922	0.566035	0.624928	19.8441	19.4868	17.9583	19.4336
ENSMUSG00000029500	Pgam5	-0.794423	0.623212	0.474078	0.419443	0.207113	0.311997	6.78793	6.21763	6.90064	6.55193
ENSMUSG00000022744	Cldnd1	-1.05452	0.623867	0.412224	0.411154	0.176089	0.223814	5.27646	5.05132	4.71438	5.05654
ENSMUSG00000096696	Zfp960	-0.996324	0.623867	0.104735	0.118877	0.0596821	0.0535686	0.284606	0.3754	0.23475	0.224576
ENSMUSG00000039615	Stub1	-0.911429	0.624676	1.36225	1.0276	0.630144	0.652611	63.8255	55.2152	61.5616	65.9137
ENSMUSG00000056820	Tsnax	-1.25799	0.624676	0.0931905	0.0853609	0.0407127	0.0347235	1.62261	1.52394	1.47524	1.44847
ENSMUSG00000095990	Zfp97	-0.987474	0.626288	0.146286	0.136089	0.0439373	0.0992811	0.377143	0.477359	0.221684	0.299912
ENSMUSG00000036992	Nxt1	-0.516385	0.630963	3.37354	2.88824	2.13297	2.28571	23.8521	20.8543	18.9893	20.0498
ENSMUSG00000003037	Rab8a	-0.593858	0.630963	0.317283	0.356251	0.221334	0.229226	8.6562	8.85003	8.18043	8.40726
ENSMUSG00000002064	Sdf2	-0.971991	0.631415	0.256192	0.382017	0.161379	0.167133	3.50924	4.38774	3.8679	3.87102
ENSMUSG00000028886	Eya3	-0.750231	0.633364	0.0494411	0.0899542	0.0426076	0.0410623	0.698272	0.770504	0.695332	0.663126
ENSMUSG00000062127	Cttnbp2nl	-1.17925	0.634375	0.0419573	0.0394709	0.0178347	0.0184706	0.230198	0.221245	0.171412	0.159052
ENSMUSG00000021178	Psmc1	-0.614099	0.638036	0.618136	0.505968	0.352405	0.388771	19.0789	17.8735	17.3904	19.149
ENSMUSG00000018909	Arrb1	-1.16392	0.639475	0.0309602	0.0343294	0.0199328	0.00958444	0.409816	0.463447	0.37801	0.378954
ENSMUSG00000117393	Gm36279	-0.714929	0.639516	0.229813	0.213928	0.182842	0.0912992	1.22567	1.30924	1.29622	1.09221
ENSMUSG00000063052	Lrrc40	-0.795625	0.639516	0.122304	0.145469	0.0781537	0.0776364	3.20363	3.22708	2.77206	2.9221
ENSMUSG00000056429	Tgoln1	-0.690472	0.639516	0.603402	0.912896	0.539072	0.41105	7.96626	9.50157	9.11683	7.81608
ENSMUSG00000117727	Gm3587	-0.432098	0.640579	0.315004	0.354365	0.278375	0.22327	1.30553	1.62152	1.29246	1.14887
ENSMUSG00000045435	Tmem60	-0.789608	0.640579	0.955854	1.1257	0.770101	0.449328	8.63993	9.68786	7.54916	7.15555
ENSMUSG00000020409	Slu7	-0.731463	0.64244	0.34275	0.399916	0.192522	0.258463	4.29661	4.61212	3.78983	3.78833
ENSMUSG00000024580	Grpel2	-0.721391	0.64244	0.392823	0.348336	0.215432	0.238239	2.99632	2.802	2.52676	2.77189
ENSMUSG00000025428	Atp5a1	-0.354389	0.64244	2.55493	2.74196	2.14908	2.03591	119.472	114.05	110.586	121.212
ENSMUSG00000028423	Nfx1	-0.595541	0.64244	0.153972	0.126546	0.0949108	0.0925687	2.18198	2.1223	2.02814	2.08423
ENSMUSG00000106917	Gm7832	-0.699997	0.649898	6.73386	7.13565	3.40334	5.1974	161.943	203.124	142.709	159.208
ENSMUSG00000041977	Arhgef11	-0.526559	0.65172	0.0800487	0.0786237	0.0598306	0.051491	0.363595	0.371033	0.313057	0.265309
ENSMUSG00000036160	Surf6	-0.806764	0.653351	0.354642	0.287507	0.231512	0.140171	2.52733	2.23658	2.568	2.14683
ENSMUSG00000099913	Gm28551	-0.933815	0.653597	0.113364	0.117555	0.0541985	0.0677442	2.9432	2.75666	2.72114	2.87235
ENSMUSG00000049659	Aftph	-0.728592	0.653597	0.0863637	0.104535	0.0700705	0.0465184	0.413312	0.447335	0.410541	0.394476
ENSMUSG00000094530	Gm21399	-0.310934	0.653597	71.3307	78.0843	56.1184	65.34	1965.05	2168.98	1618.42	1901.38
ENSMUSG00000089999	Gm6485	-0.456872	0.656598	32.158	48.0026	29.4857	29.4592	435.654	597.608	376.838	427.038
ENSMUSG00000040850	Psme4	-0.460959	0.656918	0.109095	0.12785	0.0901818	0.0837186	1.34122	1.51755	1.3303	1.34676
ENSMUSG00000037119	Fam91a1	-0.832962	0.656918	0.111319	0.0918954	0.0732491	0.042283	0.900171	0.995744	0.949836	0.926495
ENSMUSG00000024404	Riok3	-0.914596	0.656918	0.0932879	0.148609	0.0691068	0.0605598	1.87793	1.98579	1.78083	2.02967
ENSMUSG00000028992	Nmnat1	-0.970082	0.656918	0.151575	0.172041	0.0863733	0.0805075	0.869909	0.950753	0.869492	0.888565
ENSMUSG00000007415	Gatad1	-1.04381	0.656918	0.0958127	0.116286	0.0606946	0.0433507	2.6109	2.59339	2.89032	2.52518
ENSMUSG00000029198	Grpel1	-0.452373	0.656918	1.67579	1.79864	1.10655	1.45276	31.6225	30.6237	26.8255	30.0276
ENSMUSG00000029465	Arpc3	-1.36264	0.656918	0.0677141	0.078724	0.0364095	0.0212105	3.51592	2.73625	3.54537	4.10305
ENSMUSG00000096916	Zfp850	-0.590525	0.656918	0.232289	0.307338	0.180412	0.181454	0.996658	1.14934	0.969713	0.982727
ENSMUSG00000028851	Nudc	-0.926156	0.657809	0.241797	0.253122	0.165999	0.0976801	12.7634	10.2	13.3025	11.8388
ENSMUSG00000038871	Bpgm	-1.11619	0.657809	0.0750723	0.0760034	0.0327973	0.0375421	1.50342	1.6956	1.42755	1.48917
ENSMUSG00000082588	Gm15443	-1.05674	0.65897	2.69226	3.5044	1.79523	1.21812	7.50998	8.82591	4.76664	5.83414
ENSMUSG00000024999	Noc3l	-1.05091	0.65897	0.0746976	0.121449	0.0310019	0.0642145	1.07378	1.03488	0.974114	1.01898
ENSMUSG00000029152	Ociad1	-0.702163	0.65897	0.256555	0.235	0.164547	0.140777	3.29427	2.9525	3.22417	3.30455
ENSMUSG00000091474	2610021A01Rik	-0.655026	0.65897	0.202218	0.22518	0.121257	0.15249	0.915929	1.01331	0.791634	0.844975
ENSMUSG00000031226	Pbdc1	-0.594181	0.65897	0.205402	0.185294	0.133243	0.128137	4.92186	4.40145	4.11559	4.46227
ENSMUSG00000009863	Sdhb	-0.432496	0.659481	0.813752	1.05004	0.665874	0.727602	17.7378	20.2022	16.8669	16.618
ENSMUSG00000060038	Dhps	-0.746967	0.661755	1.27927	1.49989	0.760083	0.910662	28.6216	27.4981	27.1841	27.2427
ENSMUSG00000043639	Rbm20	-0.708075	0.664998	0.0260212	0.0370143	0.0235385	0.0155131	0.133167	0.17021	0.143638	0.120781
ENSMUSG00000004268	Emg1	-0.3943	0.664998	2.16048	2.26167	1.65568	1.74069	67.104	68.547	60.3947	63.2559
ENSMUSG00000097125	Gm26885	-0.616531	0.677965	0.135536	0.177356	0.111658	0.0946138	0.526656	0.585274	0.535734	0.414666
ENSMUSG00000118061	Rbfaos	0.656049	0.679785	0.507181	0.500864	0.844757	0.760138	11.7048	9.5382	13.1491	12.0403
ENSMUSG00000021622	Ckmt2	-0.490126	0.681891	0.474677	0.455178	0.367227	0.302019	1.52292	1.56255	1.41923	1.14767
ENSMUSG00000025066	Sfr1	-0.429474	0.683158	4.80292	3.96354	3.01425	3.5523	95.8503	82.1176	84.2432	90.0186
ENSMUSG00000046994	Mars2	-0.953912	0.683977	0.329214	0.254437	0.10787	0.195502	1.30657	1.04602	0.948353	1.05199
ENSMUSG00000040006	Ginm1	0.883586	0.686386	0.0653867	0.0791445	0.14283	0.12679	0.826674	0.926204	0.907988	0.9467
ENSMUSG00000040472	Rabggta	1.23392	0.686386	0.144222	0.0932506	0.326155	0.237984	5.35318	4.2973	5.06282	5.80374
ENSMUSG00000068479	Mfap1a	-1.15881	0.686386	0.106309	0.187542	0.068806	0.0641332	0.870161	1.27312	0.963284	0.872924
ENSMUSG00000020495	Smg8	-0.754851	0.692063	0.443285	0.52962	0.297508	0.284861	2.67256	3.26599	2.54285	2.08123
ENSMUSG00000034931	Dhx8	-0.839826	0.692063	0.116395	0.0957994	0.0648522	0.0549527	1.3495	1.31801	1.31768	1.2288
ENSMUSG00000044117	Bmerb1	1.04381	0.692063	0.00859581	0.0157472	0.0189974	0.0315711	0.273043	0.229724	0.249176	0.298324
ENSMUSG00000082930	Gm13462	-0.854542	0.692063	3.80859	5.14984	3.38059	1.64115	8.22171	9.74593	7.44785	5.74401
ENSMUSG00000082456	Gm11598	1.31364	0.694007	1.46461	2.53405	3.83911	6.18487	180.96	186.327	181.007	197.18
ENSMUSG00000020163	Uqcr11	-0.945162	0.696211	0.74249	0.791147	0.476635	0.329086	66.6877	62.3063	70.0124	65.2549
ENSMUSG00000018372	Cep95	-0.485297	0.696211	0.418502	0.532514	0.415306	0.272462	2.14932	2.31392	2.07984	1.64334
ENSMUSG00000058581	Gm5801	-0.916553	0.696211	3.64962	4.16169	1.95237	2.22418	50.2754	49.7356	37.6807	42.5963
ENSMUSG00000071653	1810009A15Rik	-0.820555	0.696211	1.57481	2.43913	1.07578	1.21777	121.289	108.895	113.032	110.325
ENSMUSG00000084093	Gm16418	-1.03551	0.69652	13.5897	14.6263	6.82759	7.07101	875.178	1110.05	926.77	972.417
ENSMUSG00000067942	Zfp160	-1.00522	0.69652	0.0799144	0.0700853	0.0401125	0.0353882	0.300954	0.383133	0.222847	0.243101
ENSMUSG00000029068	Ccnl2	-0.522527	0.69652	0.718068	0.768097	0.534776	0.510233	6.09635	6.18009	5.81937	5.36835
ENSMUSG00000117010	Gm49933	-0.655509	0.700871	12.2307	14.2475	9.29274	7.69925	85.4823	97.4188	72.7157	75.3082
ENSMUSG00000029048	Rer1	-0.747461	0.70106	0.317154	0.524649	0.231618	0.274144	9.5383	10.454	9.89341	9.83492
ENSMUSG00000042305	Tmem183a	-0.486215	0.702257	0.636449	0.666737	0.4762	0.463388	8.92857	8.51346	8.62593	8.811
ENSMUSG00000031568	Rwdd4a	-0.941763	0.702257	0.141536	0.182054	0.10788	0.0626758	2.56572	2.52669	2.30759	2.57516
ENSMUSG00000074582	Arfgef2	-0.900084	0.702368	0.0307869	0.0362575	0.0186654	0.0176252	0.265772	0.291211	0.314567	0.280297
ENSMUSG00000004788	Eif2b2	-0.953486	0.704967	0.398252	0.394571	0.177538	0.23535	11.3299	10.2589	8.4508	10.2377
ENSMUSG00000058600	Rpl30	-0.6333	0.704967	1.90813	3.30897	1.94241	1.45845	34.1796	30.1371	32.1469	34.0809
ENSMUSG00000036438	Calm2	-0.239853	0.704967	6.05275	5.87474	5.06715	5.13119	78.7415	79.9406	69.9905	71.1292
ENSMUSG00000051256	Jagn1	-0.474841	0.704967	2.00119	2.25607	1.38987	1.69945	14.0494	17.0897	14.4726	14.4685
ENSMUSG00000048677	Tpcn2	-0.851174	0.704967	0.0375436	0.0403938	0.0281176	0.0156385	0.150174	0.16485	0.165061	0.106774
ENSMUSG00000018846	Pank3	0.574749	0.705574	0.229165	0.222116	0.360887	0.318293	0.788755	0.84941	1.078	0.933178
ENSMUSG00000000568	Hnrnpd	-0.423125	0.705574	0.886442	1.45044	0.948856	0.811287	11.0464	12.242	11.8364	10.597
ENSMUSG00000041438	Utp4	-0.457235	0.705574	0.388583	0.444467	0.294715	0.317717	9.14451	8.64362	8.19169	9.12989
ENSMUSG00000041408	Wapl	-0.342434	0.705583	0.390675	0.513783	0.389335	0.331517	3.35604	3.71074	3.39846	3.42237
ENSMUSG00000090862	Rps13	-0.944841	0.705583	0.88515	1.30516	0.622495	0.527472	6.84372	5.24042	4.86678	5.62637
ENSMUSG00000039001	Rps21	-0.897792	0.705642	3.09773	2.68813	1.66198	1.47534	108.584	78.5034	111.353	101.159
ENSMUSG00000029580	Actb	0.232018	0.70624	45.7746	40.7738	49.381	53.2213	1403.34	1218.45	1428.24	1498.94
ENSMUSG00000120129	ENSMUSG00000120129	-1.16378	0.706374	0.192348	0.283159	0.0960371	0.11811	0.693828	0.874647	0.696269	0.553252
ENSMUSG00000046573	Lyrm4	-0.668644	0.71021	0.0354927	0.0432201	0.0269985	0.023049	0.590431	0.745068	0.602359	0.595874
ENSMUSG00000030138	Bms1	-0.671424	0.713779	0.133595	0.178396	0.0928206	0.104869	2.96001	3.04157	2.99276	2.62173
ENSMUSG00000001507	Itga3	-1.17017	0.714341	0.0611008	0.0625517	0.0361147	0.0195143	1.62456	1.70206	1.8497	1.32534
ENSMUSG00000043998	Mgat2	-0.979613	0.714341	1.31127	0.875381	0.67967	0.442453	8.48994	8.06165	8.05894	7.60214
ENSMUSG00000027472	Pdrg1	-0.857006	0.714341	0.506497	0.537197	0.34162	0.241227	8.01509	8.38352	6.9411	7.49412
ENSMUSG00000028893	Sesn2	0.829627	0.714341	0.103799	0.12389	0.241853	0.167933	1.0317	0.936377	1.4841	1.13568
ENSMUSG00000026817	Ak1	1.00057	0.714988	0.126666	0.0800166	0.248064	0.169955	3.86987	3.22067	4.43081	4.15402
ENSMUSG00000018965	Ywhah	0.32994	0.718763	2.16487	2.39587	3.02318	2.76903	31.2923	31.6638	32.9166	32.8837
ENSMUSG00000101878	Gm8203	-0.281035	0.721051	141.712	173.946	126.051	135.979	5428.6	6618.88	4656.16	5216.66
ENSMUSG00000071302	2610044O15Rik8	-0.949245	0.72109	0.176995	0.165072	0.0618598	0.116482	1.05553	1.13192	0.857602	0.902738
ENSMUSG00000019792	Trmt11	-0.724507	0.721325	0.0646239	0.0831922	0.0541762	0.0363515	0.968486	1.1007	0.797383	0.889032
ENSMUSG00000049489	Ccnq	-0.743356	0.721325	3.65474	3.52158	2.48831	1.84687	28.9056	26.8249	22.4778	23.6657
ENSMUSG00000113137	Gm7511	-1.10675	0.721325	4.38948	6.26755	3.49691	1.51873	89.8552	99.3347	81.4442	91.2406
ENSMUSG00000048833	Slc39a9	-0.907293	0.721325	0.0721416	0.0849606	0.0514563	0.0333068	0.447572	0.423455	0.425801	0.355716
ENSMUSG00000023156	Rpp14	-0.645906	0.721325	0.471131	0.510434	0.345257	0.288804	6.77821	7.41521	6.17479	6.0878
ENSMUSG00000036291	Ap5m1	-0.871913	0.721325	0.109428	0.113473	0.0613368	0.0616553	0.968336	0.930478	0.730629	0.891199
ENSMUSG00000039801	Cplane1	-0.455031	0.721325	0.112716	0.116282	0.0905276	0.078301	0.452003	0.446357	0.398421	0.362142
ENSMUSG00000046516	Cox17	-0.838512	0.721325	0.265677	0.201638	0.119384	0.144248	17.8801	15.2549	16.4717	16.9457
ENSMUSG00000014039	Prdm15	-1.33585	0.721325	0.0250149	0.0334885	0.00588453	0.0174124	0.12315	0.15158	0.132822	0.095768
ENSMUSG00000093424	6330562C20Rik	-0.948694	0.721325	0.324358	0.349925	0.170045	0.18263	0.800082	0.917728	0.77465	0.534846
ENSMUSG00000028191	Bcl10	-0.77896	0.721325	0.48778	0.294795	0.228478	0.232073	3.18817	2.73146	2.61431	2.69842
ENSMUSG00000029642	Polr1d	-0.642549	0.721325	0.190021	0.166355	0.136646	0.0943449	3.99885	3.16998	3.63947	3.80423
ENSMUSG00000032567	Aste1	-0.989793	0.721325	0.134561	0.167502	0.0723529	0.0811769	1.00404	1.20096	1.04007	1.10838
ENSMUSG00000040034	Nup43	-0.43808	0.721907	1.1028	1.3983	0.883276	0.979448	14.9133	15.5263	12.5398	13.4674
ENSMUSG00000028060	Khdc4	-0.542443	0.721907	0.325588	0.427729	0.318172	0.205463	1.23167	1.39699	1.21093	1.05639
ENSMUSG00000058186	Zfp980	-0.557571	0.722857	0.215126	0.346811	0.195486	0.189997	1.00851	1.50548	1.02104	1.1026
ENSMUSG00000060450	Rnf14	-0.894114	0.722867	0.0732457	0.129391	0.054856	0.0552337	1.369	1.46164	1.2495	1.34928
ENSMUSG00000047466	8030462N17Rik	-0.372566	0.725525	0.213501	0.235958	0.17248	0.177996	1.35451	1.42024	1.29054	1.33085
ENSMUSG00000020840	Blmh	-0.648578	0.728794	0.0798495	0.110562	0.0673349	0.0554524	2.26178	2.31754	2.16445	2.29371
ENSMUSG00000080896	Gm14567	-0.741627	0.728794	21.3687	30.2775	15.1701	16.0131	532.213	516.553	425.347	450.483
ENSMUSG00000050891	Tatdn1	-1.07489	0.732581	0.0519857	0.0732586	0.0163056	0.0434235	0.8491	0.803402	0.752386	0.77318
ENSMUSG00000040097	Flywch1	-0.717329	0.732581	0.210023	0.299883	0.153823	0.159307	1.71416	1.79081	1.97001	1.56233
ENSMUSG00000028842	Ago3	-0.782585	0.732581	0.0397784	0.0386117	0.0212689	0.0247134	0.170988	0.177287	0.15822	0.168159
ENSMUSG00000003279	Dlgap1	-0.398171	0.735993	0.0178581	0.0177937	0.0138764	0.013446	0.154247	0.138728	0.142099	0.120335
ENSMUSG00000016946	Kctd5	-0.648797	0.736689	0.277486	0.192179	0.157694	0.144943	3.49226	3.13686	3.59936	3.53987
ENSMUSG00000118257	9630014M24Rik	-0.775258	0.736689	0.0201387	0.0229874	0.0108285	0.0145789	0.546223	0.496358	0.507313	0.559324
ENSMUSG00000027353	Mcm8	-0.967456	0.736689	0.0890377	0.0929371	0.0452308	0.0487171	0.776491	0.796604	0.669416	0.740126
ENSMUSG00000101111	Gm28437	0.940422	0.738447	2.59689	1.69907	3.04699	5.237	6.38092	5.02926	9.52996	16.9195
ENSMUSG00000051235	Gen1	-1.36308	0.738447	0.0475453	0.0712648	0.0132182	0.0332458	0.440875	0.498854	0.288912	0.357881
ENSMUSG00000060121	Gemin2	-0.661268	0.738447	0.369891	0.328226	0.215462	0.230118	5.90285	5.89749	5.35963	5.85754
ENSMUSG00000069743	Zfp820	-0.902724	0.738447	0.0824542	0.136317	0.05623	0.0618744	0.42836	0.585793	0.434025	0.394904
ENSMUSG00000118147	Gm41555	-0.807575	0.738447	0.10632	0.107126	0.0809532	0.0426069	0.425278	0.543976	0.411401	0.386211
ENSMUSG00000045948	Mrps12	-0.888696	0.738447	1.62562	1.19612	0.791695	0.747575	62.5998	58.4145	55.0926	57.8527
ENSMUSG00000026112	Coa5	-1.10604	0.742004	0.156172	0.155313	0.0857723	0.0605661	3.49826	3.06129	3.58684	3.17367
ENSMUSG00000024982	Zdhhc6	-1.04285	0.742004	0.038954	0.0713625	0.0306326	0.0234998	0.746619	0.729087	0.786237	0.743769
ENSMUSG00000038039	Gcc2	-0.943768	0.743133	0.0440622	0.0700994	0.0273549	0.0325273	0.512513	0.673379	0.53798	0.385081
ENSMUSG00000079941	Cox5b-ps	-1.00915	0.743133	4.09127	5.88899	2.14486	2.85599	218.006	285.455	226.333	239.798
ENSMUSG00000011427	Zfp790	-1.29225	0.743133	0.124837	0.0857615	0.0409038	0.0458923	0.397918	0.225124	0.22838	0.225931
ENSMUSG00000038957	Edc3	-0.957326	0.743611	0.0621136	0.0581056	0.0265586	0.0358768	1.65328	1.71775	1.5404	1.47693
ENSMUSG00000036199	Ndufa13	-0.797058	0.744226	0.520015	0.438219	0.351375	0.207048	42.5511	45.5113	46.5936	39.4458
ENSMUSG00000034343	Ube2f	-0.808045	0.745837	0.0827166	0.0917179	0.0507185	0.0499004	1.15223	1.21227	1.13229	1.12933
ENSMUSG00000038250	Usp38	-0.612585	0.746777	0.168192	0.17896	0.120239	0.109152	1.53752	1.68223	1.57201	1.4405
ENSMUSG00000026311	Asb1	-1.04791	0.747664	0.137264	0.100585	0.0666303	0.0496842	0.689368	0.7013	0.663638	0.546526
ENSMUSG00000063108	Zfp26	-0.69069	0.748234	0.150214	0.145983	0.0992376	0.0861989	0.707103	0.755085	0.654648	0.643177
ENSMUSG00000037174	Elf2	-0.96389	0.751559	0.0343513	0.0260194	0.0132757	0.0179335	0.225266	0.179715	0.206639	0.197268
ENSMUSG00000058603	Rpl28-ps1	1.01034	0.751709	3.08723	2.57077	5.39495	6.09524	148.608	148.976	167.734	179.682
ENSMUSG00000027194	Ttc17	-0.796253	0.752728	0.03236	0.0346651	0.0201277	0.0188601	0.535311	0.566197	0.434663	0.47845
ENSMUSG00000106988	Tsg101-ps	-1.10248	0.754282	1.68826	1.68287	0.86772	0.718925	31.2825	29.1546	27.1162	28.4874
ENSMUSG00000002109	Ddb2	-0.715562	0.754282	0.185187	0.161251	0.113865	0.0993045	1.07225	1.10572	1.06873	0.918567
ENSMUSG00000074238	Ap1ar	-0.952592	0.754282	0.0761491	0.0924205	0.0449115	0.0430673	0.972805	0.927692	1.00968	0.957817
ENSMUSG00000055319	Sec23ip	-0.644668	0.754282	0.129607	0.144062	0.0992482	0.0777489	1.09074	1.21119	1.12227	1.06213
ENSMUSG00000047193	Dync2h1	-1.00114	0.754282	0.00998744	0.0114354	0.00337163	0.00739447	0.0492563	0.0609196	0.0414512	0.0484749
ENSMUSG00000110120	Gm45251	-0.58102	0.754469	4.75872	4.50421	3.53426	2.72725	20.1849	20.5595	19.2305	17.476
ENSMUSG00000040843	Tiprl	-0.565756	0.755261	0.291526	0.262726	0.193096	0.185088	4.38935	4.40174	3.57638	4.16342
ENSMUSG00000099902	Gm12115	-0.533015	0.755261	18.7155	16.5478	12.3781	12.2314	502.979	518.34	455.719	498.546
ENSMUSG00000001123	Lgals9	-0.397806	0.755261	0.727093	0.876705	0.697675	0.533538	1.98034	2.14575	2.00293	1.49056
ENSMUSG00000004561	Mettl17	-1.16554	0.755261	0.233858	0.246666	0.0681115	0.147492	1.49528	1.57737	1.38081	1.7635
ENSMUSG00000022635	Zcrb1	-1.16427	0.755261	0.142416	0.147844	0.0663659	0.0644363	4.29146	4.05266	4.05247	3.73301
ENSMUSG00000000346	Dazap2	-0.516977	0.755261	1.62064	1.46481	1.05968	1.11689	16.3352	13.5864	14.1604	15.1508
ENSMUSG00000116562	Gm46542	-0.592696	0.755261	22.7737	28.0975	17.462	16.6126	629.994	687.112	591.677	572.187
ENSMUSG00000053536	Cstf2t	-1.01554	0.755261	0.617605	0.477716	0.311789	0.235969	4.59773	3.96001	3.9813	4.19776
ENSMUSG00000049252	Lrp1b	-0.325362	0.755261	0.0122775	0.0152273	0.0110235	0.0111355	0.3112	0.364086	0.278496	0.325229
ENSMUSG00000027007	Itprid2	-0.802192	0.755261	0.0818581	0.107519	0.0580287	0.0517119	0.361411	0.404612	0.391356	0.338224
ENSMUSG00000027469	Tpx2	-0.48328	0.755261	0.191372	0.256198	0.172571	0.150972	2.35166	2.72716	2.4653	2.40777
ENSMUSG00000037730	Mynn	-0.622196	0.755261	0.303382	0.36156	0.196673	0.239109	1.74526	1.76597	1.32826	1.68557
ENSMUSG00000035601	Trmt10b	-1.18217	0.755261	0.0855927	0.0980019	0.0373935	0.044259	2.24069	2.59845	1.78954	1.81185
ENSMUSG00000087207	Gm13147	-1.17446	0.755261	0.25	0.405146	0.100818	0.191422	1.15384	1.55012	0.932562	1.36606
ENSMUSG00000107011	Gm42906	-1.21492	0.755261	0.00414268	0.005546	0.00278437	0.00144182	0.0192794	0.0214543	0.0194906	0.0131206
ENSMUSG00000032316	Clk3	-0.929595	0.755261	0.183016	0.167639	0.103276	0.0828059	4.47245	3.8592	3.68127	3.88843
ENSMUSG00000032405	Pias1	-0.558883	0.755261	0.0599218	0.0757737	0.0440168	0.0489452	0.341501	0.380812	0.327115	0.350774
ENSMUSG00000031256	Cstf2	-0.76144	0.755261	0.126145	0.167543	0.101035	0.074197	1.97417	2.02977	1.96007	2.09464
ENSMUSG00000002129	Sf3a1	-0.589887	0.756767	0.340325	0.287752	0.249325	0.172932	3.86661	3.47461	4.19049	3.91348
ENSMUSG00000018858	Mrpl58	-0.893009	0.756767	0.312519	0.333973	0.204799	0.147292	12.0841	12.4763	10.7007	11.4063
ENSMUSG00000026849	Tor1a	-1.18061	0.756767	0.206719	0.269462	0.104205	0.10792	4.05488	5.05422	3.95283	3.94268
ENSMUSG00000048967	Yjefn3	-0.76942	0.757252	0.311403	0.256716	0.21427	0.123283	24.0208	25.6502	26.2566	22.2367
ENSMUSG00000034509	Mad2l1bp	-0.579688	0.757338	1.03625	1.11314	0.666725	0.784266	4.45588	4.28861	3.28424	3.5292
ENSMUSG00000026281	Dtymk	-0.491991	0.761184	1.29737	1.9844	0.94917	1.39868	33.3778	31.3183	29.7714	32.3382
ENSMUSG00000093930	Hmgcs1	0.365689	0.761184	0.743988	0.818372	1.07303	0.96135	9.14553	9.69548	9.67712	9.70463
ENSMUSG00000045455	Gm9797	-1.24934	0.762	1.01518	1.60617	0.443509	0.668104	13.6588	13.7793	11.249	10.3974
ENSMUSG00000080979	Gm13675	-0.879623	0.76203	5.16165	5.83454	3.35852	2.68323	135.411	151.396	111.983	117.068
ENSMUSG00000024487	Yipf5	-0.708187	0.76237	0.265535	0.339146	0.222209	0.152293	2.88723	3.04546	2.87564	2.74804
ENSMUSG00000030007	Cct7	-0.311135	0.76237	1.87694	2.01415	1.44546	1.71705	74.92	77.1621	67.4517	76.6845
ENSMUSG00000030327	Necap1	-0.463972	0.76237	0.674602	0.728267	0.533299	0.494174	4.58167	4.3696	4.05588	4.57111
ENSMUSG00000022412	Mief1	-0.718381	0.762409	0.210123	0.219965	0.136385	0.127666	1.67798	1.5865	1.38484	1.42335
ENSMUSG00000024993	Dennd10	-0.904801	0.762409	0.0919428	0.144682	0.067976	0.059733	1.46401	1.37124	1.15353	1.42079
ENSMUSG00000055436	Srsf11	-0.42916	0.762409	0.528408	0.780929	0.547054	0.435969	8.11928	8.70207	8.32221	8.0604
ENSMUSG00000011114	Tbrg1	-0.451481	0.762409	1.36577	1.28214	0.908366	1.04528	22.192	21.5599	19.99	20.7211
ENSMUSG00000035248	Tut7	-0.945273	0.763129	0.0427947	0.0598304	0.031488	0.0224198	0.415559	0.481738	0.386712	0.413748
ENSMUSG00000062822	4833420G17Rik	-0.844998	0.763129	0.124387	0.139002	0.0760783	0.0720372	1.55235	1.54497	1.29985	1.41148
ENSMUSG00000052681	Rap1b	-0.416357	0.76707	0.42626	0.622069	0.402432	0.390629	6.61968	8.07366	5.9623	5.31843
ENSMUSG00000023018	Smarcd1	-0.881763	0.767417	0.230171	0.246719	0.12837	0.132946	13.8347	10.4429	13.7955	13.1085
ENSMUSG00000045205	Dpy19l4	-0.965896	0.769112	0.0315205	0.0568695	0.025872	0.0198797	0.23306	0.297471	0.219494	0.234235
ENSMUSG00000024477	Pggt1b	-1.01941	0.774757	0.0407308	0.0652902	0.0333643	0.0195805	0.521863	0.575953	0.502689	0.44229
ENSMUSG00000027162	Lin7c	-0.534941	0.774757	0.875647	0.686747	0.545071	0.543789	7.88655	7.65382	7.39096	7.29713
ENSMUSG00000084113	Gm14277	-0.585638	0.779654	18.3971	16.408	11.1394	12.2667	423.617	377.235	353.357	399.543
ENSMUSG00000030697	Ppp4c	-0.578732	0.779654	1.13021	0.882771	0.719589	0.642178	37.6823	29.2598	34.9613	36.2553
ENSMUSG00000100131	Gm28439	1.20084	0.780748	0.795836	0.971964	1.44868	2.64057	2.12223	2.18692	2.9553	5.58121
ENSMUSG00000061518	Cox5b	-1.20974	0.780748	0.832545	0.643442	0.386452	0.258972	37.0223	32.8155	35.2353	35.338
ENSMUSG00000031634	Ufsp2	-1.13011	0.782118	0.151807	0.057111	0.0473721	0.0490611	2.33403	2.33162	2.41124	2.42852
ENSMUSG00000082496	Gm6798	-0.29166	0.78214	87.6282	103.474	79.8085	77.8349	3931.65	5179	3747.34	3788.79
ENSMUSG00000001052	Sec24b	-0.831859	0.782166	0.0405518	0.0418723	0.0193267	0.0273549	0.320728	0.367396	0.348525	0.32559
ENSMUSG00000060560	Ces4a	-1.20282	0.790417	0.0761499	0.104628	0.0332681	0.045939	0.368058	0.430138	0.31882	0.327315
ENSMUSG00000048758	Rpl29	-0.635955	0.794131	3.54345	2.96897	2.80809	1.44167	95.4259	94.68	98.1631	96.6419
ENSMUSG00000054302	Eapp	-0.753486	0.797042	0.136386	0.154077	0.0834176	0.0905056	2.79592	2.9129	2.47472	2.53621
ENSMUSG00000020850	Prpf8	-0.687162	0.798935	0.223308	0.199844	0.161475	0.10452	7.27933	6.86054	7.56916	7.32804
ENSMUSG00000025724	Sec11a	-0.506463	0.799439	0.186917	0.188583	0.140834	0.126244	2.81189	3.38084	3.24272	2.77001
ENSMUSG00000028331	Trmo	-0.707649	0.801585	0.34589	0.300371	0.196248	0.203245	1.68004	1.58826	1.11077	1.32109
ENSMUSG00000028884	Rpa2	-0.316804	0.801585	2.31358	2.76773	2.06047	2.05826	25.3993	28.285	23.4933	25.1834
ENSMUSG00000114763	Gm49354	-1.16201	0.801886	0.0623054	0.093596	0.0457292	0.0248074	0.690344	0.824101	0.65763	0.683331
ENSMUSG00000037376	Trmt6	-0.702674	0.801886	0.343212	0.359288	0.218486	0.217402	5.9866	6.30999	5.49643	5.32857
ENSMUSG00000024667	Tmem216	-1.08253	0.805189	0.088284	0.0808667	0.0431068	0.0375946	2.26163	2.36892	2.23928	2.01366
ENSMUSG00000021496	Pcbd2	-0.681604	0.805434	0.0880902	0.100055	0.0697853	0.0488908	0.563777	0.587417	0.533652	0.428326
ENSMUSG00000079737	Bfar	-0.731964	0.805434	0.638517	0.568396	0.40075	0.333658	2.35622	2.3642	1.55585	1.52994
ENSMUSG00000040174	Alkbh3	-1.1219	0.805434	0.0576007	0.0597961	0.0301973	0.0243241	0.86401	0.796695	0.793517	0.844395
ENSMUSG00000063362	Alg11	-0.684155	0.805434	0.388834	0.409834	0.251318	0.250638	2.38094	2.80053	2.58765	2.31359
ENSMUSG00000031812	Map1lc3b	-0.355767	0.805434	2.08869	2.09693	1.63767	1.66476	43.3507	48.8248	40.3192	39.6664
ENSMUSG00000100222	Psmb6-ps2	-0.576638	0.810596	7.91095	10.8695	6.91222	5.81641	341.077	443.081	296.073	282.245
ENSMUSG00000020219	Timm13	-0.528451	0.810596	5.27451	4.51627	3.60675	3.25113	221.912	204.143	203.982	219.589
ENSMUSG00000039100	Marchf6	-0.759619	0.810596	0.0448302	0.0495596	0.0290402	0.0272779	0.442118	0.500552	0.510567	0.428052
ENSMUSG00000023026	Dip2b	-0.497425	0.810596	0.0488391	0.0497392	0.0409889	0.029657	0.30171	0.320509	0.296187	0.266041
ENSMUSG00000014769	Psmb1	-0.442274	0.810596	0.420492	0.460475	0.309935	0.344368	19.9064	20.6999	18.7644	19.004
ENSMUSG00000048222	Mfap1b	-1.22577	0.810596	0.092396	0.180807	0.0880705	0.0304035	1.57073	1.64265	1.47151	1.40996
ENSMUSG00000035399	Oser1	-0.667358	0.810596	0.227755	0.329845	0.150596	0.203312	0.855621	1.029	0.61583	0.816032
ENSMUSG00000000001	Gnai3	-0.609161	0.810596	0.130042	0.161561	0.0901163	0.102797	2.94165	3.18055	2.78838	2.79582
ENSMUSG00000073155	1810058I24Rik	-0.451046	0.810596	1.13588	0.922662	0.823946	0.698172	24.2768	20.0434	22.8973	23.413
ENSMUSG00000074221	Zfp568	-0.44591	0.810596	0.247702	0.229292	0.187802	0.166035	1.62383	1.47419	1.51502	1.53701
ENSMUSG00000030521	Mphosph10	-0.460479	0.810596	0.605244	0.716655	0.448219	0.520972	6.25542	6.79808	5.73656	5.8242
ENSMUSG00000077563	Snora68	-0.725494	0.810596	25.7219	45.4968	19.7622	23.6772	140.584	159.239	125.548	128.82
ENSMUSG00000021094	Dhrs7	-0.889553	0.816363	0.167619	0.197404	0.0941515	0.104731	2.26685	2.98299	2.20733	2.12713
ENSMUSG00000117819	Gm50253	-0.744651	0.817063	0.0689846	0.0564486	0.0313433	0.0441133	0.450699	0.406935	0.484615	0.38287
ENSMUSG00000047824	Pygo2	-1.16208	0.817063	0.283684	0.433083	0.206558	0.117657	3.3451	3.73534	3.70771	3.74364
ENSMUSG00000038482	Tfdp1	0.455504	0.817952	0.182931	0.178286	0.263411	0.237047	4.6567	4.72525	4.85776	4.72107
ENSMUSG00000037196	Pacrg	-1.07192	0.817999	0.00465026	0.00438126	0.00278618	0.00156299	0.0240485	0.0294518	0.0220572	0.0218818
ENSMUSG00000107142	4930566F21Rik	-0.40712	0.817999	1.39958	1.6865	1.16946	1.18041	6.14184	7.2812	5.79386	5.79755
ENSMUSG00000067928	Zfp760	-1.26	0.819777	0.0584369	0.124897	0.0510595	0.0264399	0.493467	0.526351	0.453862	0.402475
ENSMUSG00000051343	Rab11fip5	-0.781123	0.819777	0.0761474	0.104625	0.0626955	0.0437289	0.697041	0.704204	0.79329	0.61883
ENSMUSG00000026511	Srp9	-0.506109	0.822559	1.03756	1.18626	0.694821	0.884071	16.9873	16.8781	15.0544	16.2628
ENSMUSG00000071454	Dtnb	-0.554772	0.824864	0.0299613	0.0310016	0.0213309	0.0205851	0.306548	0.306967	0.295481	0.28041
ENSMUSG00000032547	Ryk	0.923966	0.825653	0.0142491	0.0224784	0.0338923	0.0365333	0.447264	0.43579	0.565102	0.494274
ENSMUSG00000081999	Gm13461	-0.32634	0.825669	16.3114	20.7448	15.0003	14.8378	449.784	527.954	400.108	471.671
ENSMUSG00000025531	Chm	-0.594187	0.825829	0.0376818	0.0396565	0.0248685	0.0268434	0.228897	0.2339	0.230822	0.198424
ENSMUSG00000046280	She	-0.649658	0.82606	0.160761	0.186006	0.121983	0.101449	0.655736	0.751772	0.663514	0.530212
ENSMUSG00000026087	Mrpl30	-0.770605	0.826639	0.382069	0.462223	0.25195	0.247886	12.5073	11.7338	12.0054	11.8855
ENSMUSG00000019794	Katna1	-0.732427	0.826639	0.0922631	0.108862	0.0628525	0.0594331	2.12205	2.23741	1.77627	2.00799
ENSMUSG00000022369	Mtbp	-0.906605	0.826639	0.0319875	0.0447211	0.0176521	0.0236136	0.290413	0.288374	0.270666	0.274222
ENSMUSG00000053134	Supt7l	-1.09859	0.826639	0.118438	0.176794	0.0919872	0.0476334	1.20193	1.2255	1.27249	1.13526
ENSMUSG00000032479	Map4	-0.32938	0.826639	0.137148	0.139933	0.120167	0.102732	0.97642	0.98337	1.05887	0.924936
ENSMUSG00000021770	Samd8	-1.03888	0.827898	0.0421894	0.0463738	0.0294905	0.0141802	0.289299	0.378719	0.328609	0.27815
ENSMUSG00000027286	Lrrc57	-0.86215	0.827898	0.450868	0.624518	0.278646	0.318434	6.47711	5.93293	5.11171	6.36867
ENSMUSG00000029304	Spp1	-0.241501	0.839785	9.36117	10.8798	9.00927	8.28489	196.085	224.726	200.574	198.279
ENSMUSG00000001518	Itfg2	-0.800258	0.839785	0.191303	0.316102	0.193371	0.10183	2.32189	2.17492	2.46467	2.21989
ENSMUSG00000020170	Frs2	-0.578063	0.843343	0.0690326	0.106957	0.0673759	0.0518351	0.346632	0.423794	0.402972	0.372149
ENSMUSG00000040276	Pacsin1	-0.497833	0.843343	0.156725	0.137853	0.116987	0.0939211	0.623785	0.565672	0.637536	0.466788
ENSMUSG00000042804	Gpr153	-0.345795	0.843343	1.60593	1.68184	1.40776	1.20707	4.28946	4.76281	3.96275	3.4082
ENSMUSG00000097772	5430416N02Rik	-0.519431	0.843343	0.794169	0.780244	0.576391	0.53319	3.31117	2.88045	2.66371	2.58481
ENSMUSG00000030082	Sec61a1	-0.566403	0.843343	0.356301	0.503437	0.29476	0.291549	7.33071	7.71821	9.33627	7.20983
ENSMUSG00000013593	Ndufs2	-0.877656	0.849263	0.154586	0.157688	0.0890231	0.0826595	17.809	18.0795	16.0334	17.6542
ENSMUSG00000030180	Kdm5a	-0.448459	0.849263	0.129261	0.121047	0.0870729	0.0980188	0.935158	0.994172	1.02405	1.02985
ENSMUSG00000008859	Rala	-0.702833	0.851301	0.0583981	0.0643572	0.0398637	0.0363307	1.95177	1.97334	1.86881	1.88507
ENSMUSG00000062397	Zfp706	-0.304219	0.851301	2.54613	2.27774	1.9838	1.96158	32.5158	32.3043	29.7145	30.725
ENSMUSG00000022300	Dcaf13	-0.490368	0.85217	0.264912	0.2724	0.162774	0.222708	3.68484	3.89813	3.2286	3.37928
ENSMUSG00000063281	Zfp35	-0.605119	0.85217	0.398499	0.324461	0.280487	0.200336	2.53121	2.24081	2.02789	2.18366
ENSMUSG00000033386	Frrs1	-0.68431	0.85217	0.0751335	0.108147	0.0646061	0.0507217	1.38699	1.72599	1.68705	1.46122
ENSMUSG00000033054	Npat	-0.516152	0.85217	0.182251	0.204037	0.137466	0.135319	0.94241	1.00449	0.918707	0.844334
ENSMUSG00000055334	Snupn	-0.787435	0.85217	0.0916483	0.105347	0.0533853	0.0617932	1.1483	1.34811	1.15721	1.244
ENSMUSG00000080818	Gm9434	-0.842901	0.85217	3.35857	3.66549	1.68581	2.26322	24.0816	24.1529	18.6063	24.0548
ENSMUSG00000035351	Nup37	-0.555537	0.852571	0.277538	0.193207	0.143883	0.17915	3.71346	3.45231	3.23494	3.70188
ENSMUSG00000035933	Cog5	-0.430396	0.852571	0.0388318	0.0485549	0.0375198	0.0280741	0.368183	0.418739	0.357964	0.372958
ENSMUSG00000116673	A630089N07Rik	-0.654579	0.852571	0.0587111	0.0609926	0.0312799	0.0453531	0.5105	0.608614	0.474203	0.448348
ENSMUSG00000049832	Rbx1-ps	-0.358533	0.852571	49.9235	49.1466	41.758	36.3338	1307.61	1376.76	1141.13	1174.26
ENSMUSG00000117202	Gm9349	-0.862475	0.852571	8.15956	7.32454	3.56472	5.02087	155.684	174.145	140.593	146.196
ENSMUSG00000044709	Gemin7	-0.652566	0.852571	0.349036	0.391225	0.276882	0.19948	4.3905	3.91646	3.93252	4.15584
ENSMUSG00000031782	Coq9	-0.43831	0.852571	0.662453	0.645322	0.55432	0.42184	7.31152	7.48381	6.95809	6.4735
ENSMUSG00000074578	Zfas1	0.324333	0.85478	6.32513	7.53728	9.82315	7.7332	28.5722	28.0242	31.8083	32.3682
ENSMUSG00000042292	Mrtfa	-0.587584	0.855762	0.0335275	0.0339904	0.0187714	0.02651	0.341786	0.328276	0.348978	0.330786
ENSMUSG00000119584	Rn18s-rs5	0.527046	0.855858	40.5636	27.399	47.8241	51.1498	1603.03	987.226	1988.9	2071.1
ENSMUSG00000106530	Gm42430	-1.09218	0.866297	2.45211	3.19636	1.48329	1.1948	47.2502	64.791	36.7527	39.6846
ENSMUSG00000049739	Zfp646	-1.18074	0.866297	0.19611	0.125199	0.0623097	0.080664	1.51539	1.18123	1.5162	1.22072
ENSMUSG00000066000	Zfp979	-0.407604	0.866722	0.573798	0.636972	0.579383	0.345582	3.43139	4.12117	3.05131	3.33031
ENSMUSG00000000296	Tpd52l1	-0.503958	0.871385	0.0618897	0.0730879	0.0451381	0.050913	1.11964	1.14598	0.966224	1.05344
ENSMUSG00000029366	Dck	0.515023	0.871385	0.393958	0.291015	0.591284	0.399619	2.22713	1.81884	2.70381	2.52421
ENSMUSG00000020184	Mdm2	-0.337274	0.872168	0.82562	1.03347	0.763141	0.723085	4.89001	5.05548	5.0474	4.87902
ENSMUSG00000107283	Mpv17	-0.663581	0.87356	0.277706	0.524402	0.28371	0.228101	7.86121	9.4901	7.19353	7.16777
ENSMUSG00000001930	Vwf	-0.945013	0.875571	0.01661	0.0155949	0.0101591	0.00676372	0.0818044	0.0943299	0.0874412	0.074401
ENSMUSG00000040383	Aqr	-0.645708	0.881749	0.0466907	0.0644617	0.0331099	0.0385767	0.719984	0.725194	0.745564	0.721322
ENSMUSG00000120021	ENSMUSG00000120021	-1.0165	0.882464	0.0273927	0.0250912	0.0166211	0.00963969	0.185661	0.167972	0.142277	0.172826
ENSMUSG00000022434	Fam118a	-0.735807	0.882464	0.101162	0.102086	0.0659183	0.0574076	1.38369	1.35696	1.30339	1.28003
ENSMUSG00000035885	Cox8a	-0.579571	0.883835	2.87651	2.57004	2.34855	1.34416	155.779	119.755	144.456	154.45
ENSMUSG00000004865	Srpk1	-0.480001	0.886692	0.379442	0.415861	0.385106	0.193421	4.55662	4.43939	4.35054	4.49365
ENSMUSG00000040029	Ipo8	-0.605192	0.886692	0.0869744	0.0796671	0.0526114	0.0579466	1.16985	1.21252	1.32113	1.22812
ENSMUSG00000040822	1700123O20Rik	-0.496775	0.886702	1.78421	1.66958	1.12156	1.34739	19.3696	18.2831	14.569	17.2141
ENSMUSG00000029034	Ints11	-0.877222	0.886702	0.106936	0.179578	0.0960313	0.0618234	6.71916	6.7233	5.96173	6.31405
ENSMUSG00000060152	Pop5	-0.65283	0.886702	0.525038	0.41382	0.293389	0.309374	16.6974	16.1949	17.1179	16.4134
ENSMUSG00000004994	Ccdc130	-0.885861	0.886702	0.212333	0.177581	0.112929	0.100247	1.35247	1.44179	1.33095	1.14449
ENSMUSG00000025925	Terf1	-0.503707	0.888802	0.202694	0.378257	0.198251	0.214901	2.17972	2.60761	2.09618	2.21471
ENSMUSG00000057219	Armc7	-0.851228	0.888802	0.149155	0.284034	0.154332	0.0887971	0.753628	0.769408	0.620759	0.486608
ENSMUSG00000035181	Heatr5a	-0.432216	0.888802	0.102253	0.103697	0.0787076	0.0754553	0.53561	0.614935	0.536063	0.522129
ENSMUSG00000040997	Abhd4	0.827909	0.888802	0.113014	0.0873438	0.216007	0.143812	2.72645	2.37769	2.56431	3.02326
ENSMUSG00000086324	Gm15564	0.587026	0.888802	0.309921	0.200008	0.443118	0.33144	30.9322	17.3007	38.7236	36.1301
ENSMUSG00000025612	Bach1	-0.611688	0.888802	0.130033	0.173248	0.113617	0.0871045	0.472847	0.532119	0.475125	0.423298
ENSMUSG00000024486	Hbegf	0.483323	0.888802	0.491299	0.54296	0.765227	0.695862	1.77829	1.78541	2.71096	2.29055
ENSMUSG00000018322	Tomm34	-1.04382	0.888802	0.0988589	0.111682	0.0403098	0.0626205	3.53585	2.67433	3.03763	3.28012
ENSMUSG00000042165	Adrm1b	-0.685576	0.888802	2.71282	2.94365	1.9692	1.58621	75.5833	75.8849	70.636	75.6092
ENSMUSG00000082998	Gm11221	-0.745233	0.888802	4.96298	7.04185	4.25139	2.99402	321.718	378.566	283.908	270.43
ENSMUSG00000030286	Emc3	-0.626413	0.888802	0.270069	0.310809	0.220847	0.159792	2.11208	2.63554	2.58059	2.28721
ENSMUSG00000042097	Zfp239	-0.793138	0.888802	0.269924	0.266265	0.181421	0.131522	1.66626	1.6594	1.51033	1.47493
ENSMUSG00000030309	Caprin2	-0.875946	0.888802	0.0399947	0.0623776	0.0349455	0.0215192	0.44967	0.501991	0.43918	0.403974
ENSMUSG00000058638	Zfp110	-0.530009	0.888802	0.418724	0.491205	0.269582	0.36561	3.68403	4.00702	3.27991	3.08774
ENSMUSG00000030469	Zfp719	-0.661524	0.888802	0.298453	0.33977	0.238422	0.169759	0.967841	1.01931	0.730168	0.767776
ENSMUSG00000030849	Fgfr2	-0.213267	0.888802	0.0318058	0.0371134	0.0316478	0.0284084	0.581765	0.553394	0.600331	0.576139
ENSMUSG00000110588	Gm45774	0.836154	0.888802	0.806587	0.459267	1.27618	1.00606	157.263	117.472	157.009	168.189
ENSMUSG00000111446	Gm6581	-0.302865	0.888802	130.716	188.504	135.885	125.363	472.366	538.7	487.116	453.125
ENSMUSG00000025236	Adpgk	0.953759	0.888802	0.0196663	0.0835195	0.0984146	0.103541	1.21216	1.37889	1.42623	1.2344
ENSMUSG00000046334	Gm6195	-1.26202	0.88922	2.44101	6.40965	2.55941	1.17807	160.13	195.867	142.332	143.283
ENSMUSG00000078768	Zfp566	-0.600852	0.891371	0.356742	0.395351	0.257829	0.243109	2.03035	2.38824	1.68936	1.92096
ENSMUSG00000001909	Trmt1	0.670625	0.891371	0.189322	0.204946	0.274448	0.358211	4.6599	4.30387	5.17316	4.9293
ENSMUSG00000091825	Gm5778	-0.992088	0.892387	1.68002	2.03528	0.804988	1.07889	62.1606	75.8016	61.7947	58.9957
ENSMUSG00000090935	Synj2bp	-0.764192	0.892387	0.0830632	0.0958665	0.0522552	0.0541183	1.24595	1.27974	1.16268	1.15603
ENSMUSG00000022362	Gm29394	-0.571622	0.892387	0.116957	0.110444	0.0747997	0.0796487	1.2612	1.05474	1.09039	1.26565
ENSMUSG00000060657	Marf1	0.76674	0.892387	0.0557595	0.056968	0.0515308	0.140698	0.371015	0.331986	0.311059	0.359992
ENSMUSG00000033439	Trmt13	-0.823079	0.892387	0.0711132	0.108035	0.0424339	0.0596421	0.660833	0.745121	0.568312	0.488124
ENSMUSG00000015994	Fnta	-0.481658	0.892387	0.494172	0.436936	0.353823	0.319857	15.2232	16.7262	14.1859	14.5147
ENSMUSG00000026914	Psmd14	-0.441475	0.894201	0.104816	0.130813	0.0795628	0.095441	3.16871	3.43534	2.76409	2.96164
ENSMUSG00000056342	Usp34	-0.362296	0.894929	0.0781295	0.0967725	0.0663312	0.070986	0.763897	0.880224	0.822231	0.766248
ENSMUSG00000039210	Gpatch2	-0.767053	0.896973	0.0217545	0.030867	0.0201262	0.0111939	0.182141	0.186765	0.191199	0.154398
ENSMUSG00000014074	Rnf168	-0.695203	0.896973	0.147809	0.182	0.122797	0.0833214	0.792351	0.921097	0.8871	0.670956
ENSMUSG00000082848	Gm16066	-0.627291	0.896973	0.0993372	0.0771447	0.0547193	0.0605785	0.700759	0.725952	0.769844	0.632166
ENSMUSG00000016252	Atp5e	-0.489734	0.896973	2.71906	2.45554	1.68982	2.02731	164.905	132.845	149.608	154.699
ENSMUSG00000092607	Scnm1	-0.959578	0.896973	0.428322	0.606337	0.362907	0.176178	17.1199	17.9405	14.3575	14.611
ENSMUSG00000046010	Zfp830	-0.602264	0.899187	3.10381	3.07717	2.26529	1.85041	17.0892	15.4862	12.5389	14.4067
ENSMUSG00000083992	Gm11478	0.232737	0.899187	70.0256	75.2473	85.1676	87.1509	2615.78	2579.2	2540.03	2784.27
ENSMUSG00000019715	Gle1	-0.714586	0.899187	0.121101	0.174923	0.0915687	0.0906186	1.83981	1.96042	1.72963	1.77444
ENSMUSG00000042133	Ppig	-0.484654	0.899187	0.22339	0.267191	0.185509	0.168734	2.72683	2.79029	2.90684	2.68972
ENSMUSG00000084342	Gm11224	-1.01057	0.899187	1.62104	1.72434	0.77673	0.899061	67.9792	83.3431	70.8652	69.4643
ENSMUSG00000039183	Nubp2	-0.671311	0.899677	1.38287	1.0959	0.597355	0.97016	39.9789	42.8254	34.8367	38.7361
ENSMUSG00000085754	Gm15886	-0.553034	0.901837	0.392833	0.326285	0.287972	0.207864	1.66122	1.90282	1.54167	1.16584
ENSMUSG00000092541	Gm20537	-0.395669	0.908297	0.233872	0.269402	0.213635	0.173154	3.00609	3.05863	3.10958	3.0334
ENSMUSG00000026037	Orc2	-0.457436	0.911907	0.204452	0.241321	0.19063	0.137826	3.08737	3.36215	2.79112	2.88194
ENSMUSG00000005899	Smpd4	0.694247	0.911907	0.111745	0.0856454	0.195275	0.127946	2.87801	3.00385	3.18418	3.08103
ENSMUSG00000026927	Entr1	-0.906201	0.911907	0.374526	0.318555	0.171413	0.201732	9.34531	8.85419	8.56286	9.27968
ENSMUSG00000029629	Phf14	-0.576165	0.911907	0.0278089	0.0340656	0.0225416	0.0194039	0.378267	0.420142	0.374717	0.365338
ENSMUSG00000029910	Mad2l1	-0.397704	0.911907	0.928083	0.994043	0.776591	0.697634	21.2968	20.8209	18.1834	20.1114
ENSMUSG00000053226	Dand5	-0.608204	0.911907	0.283545	0.278498	0.208945	0.163841	3.2659	2.97899	3.14014	2.59364
ENSMUSG00000069862	Rps12-ps9	0.581319	0.911907	9.75548	8.00226	13.1039	13.7028	63.1922	54.0152	80.786	70.6222
ENSMUSG00000056486	Chn1	0.743797	0.91485	0.0126996	0.0113095	0.0234255	0.0172379	0.0945414	0.11568	0.123909	0.118111
ENSMUSG00000040648	Ppip5k2	-0.315789	0.915839	0.46575	0.529141	0.483451	0.325896	2.06429	2.08101	1.96299	1.58047
ENSMUSG00000034801	Sos2	-0.874017	0.915839	0.026652	0.0222428	0.0119024	0.0150065	0.143329	0.16872	0.141794	0.125947
ENSMUSG00000061244	Exoc5	-0.652857	0.915839	0.065001	0.0705973	0.0511154	0.0361321	0.609152	0.629421	0.606894	0.583156
ENSMUSG00000022009	Nufip1	-0.475295	0.915839	0.269765	0.315405	0.212712	0.212358	3.28105	3.28262	3.0872	3.43146
ENSMUSG00000022248	Rad1	-0.686762	0.915839	0.249378	0.330401	0.190658	0.173277	5.51302	5.75551	4.92208	5.25875
ENSMUSG00000042211	Fbxo38	-0.781846	0.915839	0.0691294	0.0609319	0.0410278	0.0354088	0.859552	0.831541	0.978968	0.922989
ENSMUSG00000036299	BC031181	-0.661046	0.915839	0.908386	1.1798	0.533086	0.797466	21.964	21.7703	20.7903	20.8077
ENSMUSG00000035372	1810055G02Rik	-0.890596	0.915839	0.296872	0.205335	0.158812	0.115132	3.07778	2.94683	2.60452	2.87281
ENSMUSG00000025221	Kcnip2	-1.12758	0.915839	0.0671548	0.0571189	0.0314339	0.0260437	0.359758	0.353698	0.362538	0.373293
ENSMUSG00000026740	Dnajc1	-0.535028	0.915839	0.0279907	0.0394031	0.02214	0.0247957	0.251916	0.287427	0.26774	0.249823
ENSMUSG00000026775	Yme1l1	-0.42115	0.915839	0.220779	0.240691	0.173971	0.174045	4.94383	4.98627	4.68774	4.6649
ENSMUSG00000034173	Chchd2l	-0.302003	0.915839	2.83091	3.13862	2.67268	2.22236	5.08828	5.698	4.59367	4.26506
ENSMUSG00000029670	Ing3	0.457758	0.915839	0.259005	0.22317	0.316445	0.351562	1.68353	1.4114	1.81045	1.81342
ENSMUSG00000015134	Aldh1a3	-0.545616	0.915839	0.155439	0.171436	0.128886	0.097599	0.615411	0.70318	0.636114	0.429149
ENSMUSG00000032119	Hinfp	-1.0345	0.915839	0.114155	0.168911	0.0882344	0.0516497	0.829818	0.924989	0.836308	0.659526
ENSMUSG00000026134	Prim2	-0.575863	0.915954	0.0236703	0.023899	0.0171567	0.0150909	0.319818	0.340992	0.275212	0.300115
ENSMUSG00000034152	Exoc3	-1.02367	0.915954	0.0414496	0.0488149	0.0206953	0.0241123	1.18575	1.38038	1.11237	1.10514
ENSMUSG00000038718	Pbx3	-0.544213	0.915954	0.0273649	0.0295513	0.0201349	0.0192888	0.109748	0.114247	0.098661	0.0959228
ENSMUSG00000052331	Ankrd44	-0.670181	0.917615	0.0146766	0.0128755	0.00830831	0.00916569	0.0398955	0.0450641	0.0390129	0.0364757
ENSMUSG00000068874	Selenbp1	-0.395098	0.917615	1.00773	0.986726	0.841473	0.691788	4.54721	5.21555	4.41556	3.47691
ENSMUSG00000060461	Dppa5a	-0.178673	0.917615	190.076	201.659	185.916	163.877	7632.05	8112.79	7287.49	6864.44
ENSMUSG00000015733	Capza2	-0.2724	0.91895	1.08107	1.33302	0.964403	1.0518	16.4938	17.968	13.7956	15.2708
ENSMUSG00000089695	Gm15946	-0.769194	0.919544	7.00449	6.79341	4.20013	3.97703	161.515	176	154.085	147.896
ENSMUSG00000028636	Ppcs	-0.54314	0.919544	1.4483	1.72323	0.965397	1.2295	13.2885	13.6901	10.1236	11.2682
ENSMUSG00000066042	Med18	-0.896526	0.919544	0.503626	0.379302	0.215133	0.263313	2.31668	1.87601	1.55482	1.80268
ENSMUSG00000025147	Mob2	-0.942186	0.919544	0.0387078	0.0395078	0.0241579	0.0170131	0.404773	0.37887	0.459001	0.395304
ENSMUSG00000031754	Nudt21	-0.498315	0.919544	0.315622	0.326169	0.216849	0.241668	5.84845	4.82829	5.54852	5.85374
ENSMUSG00000096914	Galntl6	-0.970296	0.919613	0.00204098	0.00149561	0.000757909	0.00106197	0.0118377	0.0146756	0.0146232	0.010989
ENSMUSG00000001175	Calm1	-0.286252	0.921673	2.43466	2.9581	2.21532	2.24872	83.3606	100.524	81.8837	78.8166
ENSMUSG00000039789	Zfp597	-1.03757	0.923065	0.0509207	0.0851732	0.0328855	0.0340579	0.141692	0.208877	0.119935	0.146249
ENSMUSG00000064317	Gm10146	-0.780385	0.925578	8.08456	15.3273	8.87096	4.93389	475.109	643.919	464.247	436.224
ENSMUSG00000049038	Mterf2	-1.10543	0.925578	0.141945	0.216699	0.0826833	0.0856312	1.06121	1.03396	1.05126	1.06427
ENSMUSG00000020321	Mdh1	-0.611641	0.925578	0.266836	0.312311	0.181338	0.201217	17.2368	18.2057	15.7505	16.4831
ENSMUSG00000035575	Utp6	-0.73802	0.925578	0.102397	0.107952	0.059084	0.0681837	1.90691	1.88297	1.82485	1.56997
ENSMUSG00000020640	Itsn2	-0.742938	0.925578	0.0215481	0.0381595	0.0209197	0.0151659	0.133119	0.189043	0.155224	0.151225
ENSMUSG00000021326	Trim27	-0.440774	0.925578	0.581721	0.578121	0.47506	0.388781	5.9769	5.55136	5.58776	5.17457
ENSMUSG00000021413	Prpf4b	-0.577147	0.925578	0.154857	0.200661	0.140257	0.100826	2.00748	1.98066	1.92565	1.86614
ENSMUSG00000038546	Ranbp9	-0.654638	0.925578	0.0509952	0.0500956	0.0361624	0.0287575	0.389485	0.454922	0.385517	0.399261
ENSMUSG00000045996	Polr2k	-0.592346	0.925578	1.87781	1.52499	1.31936	0.963488	25.0117	20.3746	24.3067	21.5121
ENSMUSG00000052299	Ltn1	-0.72761	0.925578	0.053983	0.0694167	0.0453536	0.0300612	0.744342	0.863429	0.705703	0.773137
ENSMUSG00000023971	Rrp36	-0.562001	0.925578	0.65122	0.689297	0.512105	0.405957	9.10261	7.92028	7.88389	8.53819
ENSMUSG00000033184	Tmed7	-0.535711	0.925578	0.179112	0.184036	0.15786	0.0958381	1.70701	1.88744	1.96645	1.65603
ENSMUSG00000024661	Fth1	0.373667	0.925578	3.47208	2.47099	3.60891	4.15806	180.277	120.287	173.938	188.281
ENSMUSG00000024795	Kif20b	-0.463257	0.925578	0.140384	0.206341	0.135973	0.118171	1.59537	1.85707	1.47478	1.53032
ENSMUSG00000111410	Gm49337	-0.51558	0.925578	0.0468598	0.0538639	0.0341199	0.0369993	0.698762	0.715801	0.68561	0.611112
ENSMUSG00000028668	Eloa	-0.733069	0.925578	0.145272	0.219849	0.110375	0.111453	1.61694	1.63151	1.33278	1.31457
ENSMUSG00000100691	2010320M18Rik	-1.09214	0.925578	1.73421	1.3403	0.520875	0.931769	14.253	12.857	10.6069	11.6226
ENSMUSG00000045128	Rpl18a	-0.401874	0.925578	3.75649	4.82514	3.37656	3.18437	79.8362	63.6365	78.6041	80.8986
ENSMUSG00000033009	Ogfod1	-1.23063	0.925578	0.0548361	0.048497	0.00826091	0.0359328	0.816869	0.900658	0.933482	0.864099
ENSMUSG00000052825	Gm9892	-0.224028	0.926788	52.1225	53.1614	44.6723	46.318	951.264	999.82	859.979	923.232
ENSMUSG00000054091	1810037I17Rik	-0.350626	0.927224	8.09007	8.21584	5.81377	7.08202	117.716	108.766	103.905	107.212
ENSMUSG00000016257	Prelid3b	-0.4987	0.930515	0.877058	1.06231	0.576333	0.806773	20.3028	18.2186	16.625	18.8706
ENSMUSG00000098923	Tmem185b	-0.968494	0.931272	0.720029	0.621847	0.395452	0.297855	3.33271	2.4497	2.26486	2.23391
ENSMUSG00000026404	Ddx59	1.05009	0.931272	0.0443517	0.02352	0.0632277	0.0781558	0.8847	0.724843	0.907623	0.958993
ENSMUSG00000111042	Gm18252	1.00694	0.931272	0.00591264	0.00684111	0.00625381	0.0194303	0.0466787	0.0444672	0.0440486	0.0658941
ENSMUSG00000020076	Ddx50	-0.740871	0.931272	0.0970351	0.115999	0.0890958	0.0401831	0.863448	0.921968	0.889521	0.930165
ENSMUSG00000078427	Sarnp	-0.378089	0.931272	0.189809	0.201221	0.156586	0.147347	3.88386	3.7473	3.63431	3.59648
ENSMUSG00000018654	Ikzf1	-0.570492	0.931272	0.0508647	0.0707944	0.0427116	0.0400501	0.162503	0.221459	0.14545	0.140474
ENSMUSG00000000301	Pemt	-0.961166	0.931272	0.0222045	0.028755	0.0153872	0.0110858	0.133227	0.128346	0.138485	0.104622
ENSMUSG00000014177	Tvp23b	-0.796837	0.931272	0.0607016	0.102649	0.057118	0.0380279	0.93387	0.945227	0.775173	0.818303
ENSMUSG00000017188	Coa3	-0.666551	0.931272	3.03903	3.47962	1.99152	2.15419	145.569	167.532	133.565	127.693
ENSMUSG00000023243	Kcnk5	0.696928	0.931272	0.0598312	0.0446082	0.0838874	0.0868782	0.29359	0.31863	0.39269	0.321072
ENSMUSG00000022706	Mrpl40	-0.501466	0.931272	1.48688	1.27409	1.03723	0.933156	40.4814	40.7378	35.4755	36.5233
ENSMUSG00000117508	Gm34804	-0.805795	0.931272	0.106224	0.156191	0.0757162	0.0758862	0.315876	0.378955	0.319962	0.255483
ENSMUSG00000092341	Malat1	-0.246774	0.931272	8.99541	12.0549	8.67335	9.2158	143.079	177.777	128.037	154.464
ENSMUSG00000042079	Hnrnpf	-0.283266	0.931272	0.927737	0.999136	0.796567	0.802109	9.59656	11.9391	9.82768	9.49855
ENSMUSG00000030612	Mrpl46	-0.408693	0.931272	1.13447	1.33422	0.979009	0.899848	15.3924	16.5174	14.0733	14.7905
ENSMUSG00000025487	Psmd13	-0.65884	0.931272	0.257802	0.223378	0.133936	0.173389	12.7682	11.8933	11.6007	12.6069
ENSMUSG00000031490	Eif4ebp1	-0.24502	0.931272	3.07434	2.64675	2.58373	2.29634	84.9725	72.1069	79.0802	82.2244
ENSMUSG00000038102	Trappc11	-0.795355	0.931272	0.0656589	0.058915	0.0398075	0.0327389	1.11218	1.15007	1.12164	1.15314
ENSMUSG00000033938	Ndufb7	-0.653578	0.931272	1.01985	0.6872	0.522365	0.572812	69.1268	63.6519	65.5927	65.2581
ENSMUSG00000110715	Gm5131	-1.11196	0.931272	1.22011	1.20357	0.451032	0.679437	13.7966	15.6464	9.8817	12.4422
ENSMUSG00000032555	Topbp1	-0.455038	0.931272	0.167039	0.2401	0.159423	0.14069	1.97748	2.28448	2.17242	1.94175
ENSMUSG00000026150	Mff	-0.612823	0.932295	0.141517	0.185735	0.105196	0.110858	3.34361	2.82665	2.91226	3.36205
ENSMUSG00000004393	Ddx56	-0.497395	0.932295	0.708649	0.997706	0.687982	0.534383	18.6151	21.4928	16.8785	18.8459
ENSMUSG00000030465	Psd3	-1.00649	0.932295	0.00299953	0.00366336	0.0018443	0.00150794	0.0206634	0.0251347	0.0217434	0.0175926
ENSMUSG00000002825	Qtrt1	0.600426	0.932295	0.330482	0.391009	0.601583	0.504656	11.2639	11.9762	10.7383	10.3984
ENSMUSG00000034893	Cog3	-0.859545	0.933943	0.0378338	0.053002	0.0233346	0.0271874	0.346068	0.406688	0.335436	0.323228
ENSMUSG00000025607	Copg2	-0.57963	0.935545	0.0354533	0.0434401	0.0249429	0.0283321	1.07649	1.11046	1.13329	1.0937
ENSMUSG00000032040	Dcps	-1.04172	0.940991	0.0359909	0.0288462	0.0196545	0.0122131	1.17533	1.01065	0.980758	1.1806
ENSMUSG00000036112	Metap2	-0.462162	0.943334	0.198645	0.199875	0.161732	0.130731	5.93827	6.32984	5.57385	5.6078
ENSMUSG00000018849	Wwc1	0.620319	0.943334	0.0216642	0.0175976	0.0328582	0.0281115	0.211737	0.210047	0.252151	0.235619
ENSMUSG00000081485	Gm12338	-0.43904	0.943334	43.2695	42.96	33.3123	30.9405	1311.7	1403.82	1265.6	1263.63
ENSMUSG00000033114	Slc35d2	-1.14041	0.943334	0.0263586	0.0692128	0.0214955	0.0222619	0.34969	0.465175	0.391525	0.313256
ENSMUSG00000074800	Gm4149	-0.371674	0.943334	44.414	42.8034	34.9446	33.1428	2607.38	2250.26	2560.89	2764.95
ENSMUSG00000022179	4931414P19Rik	-0.688338	0.943334	0.150892	0.154896	0.102292	0.0894592	0.632186	0.552859	0.497819	0.463775
ENSMUSG00000049148	Plcxd3	-0.293003	0.943334	0.113252	0.113844	0.102252	0.0851389	0.204143	0.215187	0.191311	0.143738
ENSMUSG00000033099	Nol12	-0.750765	0.943334	0.367021	0.305623	0.198242	0.20531	6.94003	5.93519	5.58576	5.83322
ENSMUSG00000057880	Abat	-1.00531	0.943334	0.0161169	0.0152549	0.0075105	0.00826442	0.125175	0.130405	0.115474	0.0918809
ENSMUSG00000033618	Map3k13	-0.443236	0.943334	0.0593098	0.0608307	0.0492675	0.0400633	1.69284	1.91598	1.53605	1.60027
ENSMUSG00000057409	Zfp53	-1.13784	0.943334	0.0811549	0.0619471	0.0189091	0.0465104	0.603251	0.535223	0.411274	0.526302
ENSMUSG00000097727	F630040K05Rik	-0.706478	0.943334	0.0622968	0.0580467	0.0375393	0.0369338	0.244891	0.241041	0.19802	0.204108
ENSMUSG00000007670	Khsrp	0.897678	0.943334	0.127598	0.101633	0.266605	0.165666	3.62823	3.03374	4.77466	4.13162
ENSMUSG00000008730	Hipk1	-0.668933	0.943334	0.0628684	0.081238	0.0510078	0.0406357	0.91496	1.01188	0.954435	0.79646
ENSMUSG00000074182	Znhit6	-0.730028	0.943334	0.117854	0.0986463	0.0674667	0.0643559	2.37334	2.44941	2.04531	2.32968
ENSMUSG00000028772	Zcchc17	-0.636523	0.943334	0.086047	0.103896	0.0524008	0.0707858	3.15897	3.01895	3.06431	3.14997
ENSMUSG00000029911	Ssbp1	-0.519203	0.943334	0.448265	0.430536	0.308015	0.31112	13.8614	11.768	12.5411	13.4136
ENSMUSG00000080921	Rpl38-ps2	-0.484411	0.943334	32.4574	34.4773	27.4065	20.9792	1983.45	1703.88	1767.6	1904.91
ENSMUSG00000092416	Zfp141	-0.455681	0.943334	0.258564	0.238485	0.203956	0.162483	1.44006	1.33716	1.47633	1.36648
ENSMUSG00000030313	Dennd5b	-0.325626	0.945314	0.187671	0.197197	0.183637	0.127252	0.754773	0.770988	0.722038	0.608035
ENSMUSG00000030359	Pzp	-0.532573	0.945868	0.134625	0.127014	0.0999846	0.0828395	0.648892	0.654798	0.664604	0.596932
ENSMUSG00000019804	Snx3	-0.403878	0.946632	0.30135	0.288796	0.229821	0.220676	9.78777	9.17286	9.19286	9.78542
ENSMUSG00000049164	Zfp518a	-0.357143	0.946632	0.582385	0.817354	0.572196	0.531527	2.18457	2.66957	2.19706	2.14194
ENSMUSG00000026781	Acbd5	-0.871293	0.946632	0.0478086	0.0482834	0.0332041	0.0199672	0.364081	0.364932	0.351321	0.347207
ENSMUSG00000060227	Golm2	-0.656861	0.946632	0.0453017	0.0806859	0.0381165	0.042512	0.394292	0.553274	0.491849	0.436507
ENSMUSG00000029657	Hsph1	-0.506651	0.946632	0.286667	0.305944	0.24588	0.176111	5.14685	5.73585	5.31055	4.943
ENSMUSG00000053768	Chchd3	-0.356451	0.946632	0.0483262	0.0513802	0.0426022	0.0361168	0.787889	0.760229	0.721032	0.758843
ENSMUSG00000030126	Tmcc1	-0.336438	0.946632	0.0820566	0.0973765	0.072568	0.0709466	11.9557	12.9937	10.3482	11.2309
ENSMUSG00000001380	Hars	-0.657412	0.947729	0.209004	0.239305	0.161312	0.126086	6.78565	6.63991	6.23944	6.75819
ENSMUSG00000031320	Rps4x	-0.366793	0.948494	2.6348	3.33341	2.33636	2.33703	100.227	95.1634	101.124	101.448
ENSMUSG00000053565	Eif3k	-0.263374	0.954406	3.10052	2.90089	2.38981	2.65537	59.8512	49.0361	53.94	57.2409
ENSMUSG00000041020	Map7d2	-0.463226	0.954406	0.0876416	0.0967132	0.0771801	0.0580755	0.488585	0.498737	0.454639	0.411524
ENSMUSG00000022721	Trmt2a	-0.383264	0.954603	1.7732	1.8076	1.37441	1.39753	14.9864	15.107	14.6521	14.4412
ENSMUSG00000033423	Eri3	-0.380982	0.954603	0.104536	0.121516	0.104445	0.0712643	0.874256	0.837301	0.873654	0.783059
ENSMUSG00000063785	Utp14a	-0.751294	0.954603	0.0953436	0.139317	0.0793398	0.0616264	2.96927	2.83625	2.67375	2.59447
ENSMUSG00000068015	Lrch1	-0.350083	0.955462	0.0739725	0.0691347	0.0609553	0.0525164	0.35182	0.364403	0.354697	0.314554
ENSMUSG00000034731	Dgkh	0.693625	0.955462	0.00934734	0.017124	0.02246	0.020844	0.0727757	0.0853143	0.110258	0.0975743
ENSMUSG00000024259	Slc25a46	-0.757354	0.955462	0.0518319	0.0563792	0.0264182	0.0381087	0.588509	0.608302	0.540629	0.579447
ENSMUSG00000027808	Serp1	-0.405845	0.955462	1.62547	1.55897	1.28658	1.1421	19.0466	16.7895	16.5585	18.0401
ENSMUSG00000029094	Afap1	1.01647	0.955462	0.00525257	0.0110659	0.0201936	0.0133086	0.094021	0.0995932	0.115654	0.117876
ENSMUSG00000054027	Nt5dc3	0.811911	0.959177	0.026414	0.0224025	0.0512873	0.0354106	0.13207	0.135311	0.178651	0.139872
ENSMUSG00000071172	Srsf3	-0.233084	0.959177	3.56816	3.89233	3.25468	3.15546	38.801	41.1072	38.8813	39.1522
ENSMUSG00000070953	Rabepk	-0.767399	0.959177	0.12733	0.114252	0.0703856	0.072895	2.39587	2.48021	2.31818	2.23388
ENSMUSG00000058883	Zfp708	-1.05384	0.960785	0.0548881	0.0614492	0.0177625	0.0386311	0.211421	0.2309	0.119009	0.180278
ENSMUSG00000116690	Gm49736	-0.706952	0.960785	0.822727	0.846152	0.643191	0.391837	3.40638	3.37139	3.11506	2.1551
ENSMUSG00000060591	Ifitm2	-0.513652	0.960785	6.56167	6.51896	5.9979	3.28857	363.062	349.111	387.085	352.334
ENSMUSG00000110447	Gm31518	-0.895512	0.960785	0.0558457	0.106097	0.0506026	0.0374334	0.248203	0.261452	0.184338	0.181552
ENSMUSG00000028069	Gpatch4	-0.962635	0.961303	0.130745	0.148668	0.0630285	0.0815946	2.62843	2.58105	2.46205	2.58247
ENSMUSG00000026436	Elk4	-1.05373	0.962487	0.0720218	0.0510742	0.0304497	0.0294329	0.267178	0.270267	0.219238	0.245975
ENSMUSG00000052459	Atp6v1a	-0.480247	0.962487	0.118751	0.195989	0.122455	0.105522	2.32367	2.48906	2.44909	2.29729
ENSMUSG00000026784	Pdss1	-0.508131	0.962487	0.133733	0.151041	0.117984	0.0845936	1.54248	1.51397	1.28648	1.3817
ENSMUSG00000030314	Atg7	-0.566842	0.962487	0.0194973	0.0281343	0.0172692	0.0152263	0.164525	0.15951	0.158456	0.140662
ENSMUSG00000058447	Gm26920	-0.498205	0.962487	0.180827	0.185758	0.146185	0.116224	0.990322	1.11455	0.840194	0.908381
ENSMUSG00000005470	Asf1b	-0.425697	0.962487	0.581316	0.608544	0.421545	0.472359	7.87348	8.88185	6.86911	7.09612
ENSMUSG00000064181	Rab3ip	-0.737827	0.964324	0.0581141	0.0709754	0.0372368	0.0409016	0.91562	0.83751	0.90948	0.969952
ENSMUSG00000056167	Cnot10	-0.669767	0.964878	0.0727444	0.0578137	0.0392581	0.0435619	1.73945	1.74421	1.71801	1.68826
ENSMUSG00000100744	Gm17764	-0.88489	0.965224	4.30891	6.53279	3.24563	2.68907	83.9495	89.0093	75.4284	76.7731
ENSMUSG00000026254	Eif4e2	-0.301447	0.965224	0.679882	0.750917	0.580678	0.59149	9.76538	9.36945	8.83051	9.64584
ENSMUSG00000026667	Uhmk1	-0.845482	0.965224	0.0793012	0.138013	0.0623607	0.0598	0.613263	0.62227	0.582033	0.531024
ENSMUSG00000020412	Ascc2	-0.906435	0.965224	0.0339226	0.0554866	0.02964	0.0186373	0.382841	0.461649	0.445658	0.429754
ENSMUSG00000034274	Thoc5	-1.0385	0.965224	0.0484884	0.0460008	0.0181572	0.0282069	1.57587	1.47837	1.43745	1.5122
ENSMUSG00000078656	Vps25	-0.809797	0.965224	0.467314	0.373407	0.278003	0.206939	22.0831	21.3115	22.0404	20.6399
ENSMUSG00000021843	Ktn1	-0.528431	0.965224	0.0578121	0.0628476	0.0466278	0.0379423	0.54445	0.612182	0.576187	0.501874
ENSMUSG00000021965	Ska3	-0.462382	0.965224	0.411483	0.355219	0.258658	0.302704	3.54645	3.5088	2.95387	3.52798
ENSMUSG00000000776	Polr3d	-0.683022	0.965224	0.619229	0.816773	0.443664	0.459482	7.93851	7.49843	7.74788	6.64567
ENSMUSG00000022858	Tra2b	-0.241233	0.965224	1.61912	1.86006	1.50461	1.4676	15.4006	16.3363	14.942	15.7761
ENSMUSG00000038495	Otud7b	-0.766664	0.965224	0.0502881	0.046063	0.0340754	0.0232173	0.33457	0.342182	0.32282	0.296253
ENSMUSG00000029066	Mrpl20	-0.539277	0.965224	0.777561	0.697238	0.536365	0.48883	24.9474	23.5786	22.8492	23.4342
ENSMUSG00000029177	Cenpa	-0.392156	0.965224	1.34889	1.21574	1.02103	0.952996	41.8372	37.5426	37.8286	42.6041
ENSMUSG00000009013	Dynll1	0.402709	0.965224	2.27008	1.79207	2.87084	2.55424	64.8465	48.8785	64.5155	67.8833
ENSMUSG00000030604	Zfp626	-1.10666	0.965224	0.147818	0.0643143	0.032289	0.0668805	0.71322	0.561904	0.574745	0.528356
ENSMUSG00000066568	Lsm14a	-0.301513	0.965224	0.380782	0.385965	0.332709	0.295964	2.87556	2.91934	2.77119	2.5373
ENSMUSG00000031629	Cenpu	-0.750515	0.965224	0.0934354	0.11031	0.0526121	0.069519	2.52898	2.46676	2.44374	2.5102
ENSMUSG00000031762	Mt2	0.249853	0.965224	51.0347	40.8668	52.6126	57.6833	682.516	498.457	717.169	733.444
ENSMUSG00000042111	Ccdc115	-0.577825	0.967726	1.4703	1.52397	1.08183	0.94534	13.4455	13.1841	12.6946	13.7249
ENSMUSG00000037957	Wdr20	-0.323995	0.967726	0.230474	0.269707	0.216691	0.187146	1.1217	1.20245	1.05512	0.978552
ENSMUSG00000020115	Tbk1	-0.689848	0.969294	0.0720205	0.0949962	0.060411	0.0443168	0.655387	0.713791	0.693468	0.663448
ENSMUSG00000091803	Cox16	-0.644288	0.969949	0.0262603	0.03376	0.0217374	0.0170927	0.4174	0.410184	0.40657	0.414811
ENSMUSG00000039318	Rab3gap2	-0.712072	0.970612	0.0421786	0.0431423	0.0356252	0.0171754	0.721956	0.730843	0.748129	0.613862
ENSMUSG00000037851	Iars	-0.473384	0.970612	0.120272	0.14587	0.105088	0.0886805	2.73174	2.93066	2.88701	2.82064
ENSMUSG00000038622	Med30	-0.784249	0.970612	0.17918	0.120164	0.103441	0.0723845	3.49402	3.00703	3.04173	3.3239
ENSMUSG00000024095	Hnrnpll	-0.617421	0.970612	0.134416	0.131223	0.10972	0.0656182	2.33106	2.42682	2.3273	2.21021
ENSMUSG00000000827	Tpd52l2	-0.586647	0.970612	0.209229	0.212093	0.131627	0.151466	8.12089	7.70436	7.02009	8.03528
ENSMUSG00000030298	Sec13	-0.579914	0.970612	0.37106	0.348277	0.220146	0.265303	25.7589	24.3374	21.5983	24.4493
ENSMUSG00000060924	Csmd1	-0.836523	0.970612	0.0012729	0.00165177	0.00105041	0.000607923	0.0121633	0.0149955	0.0119562	0.0105907
ENSMUSG00000027331	Knstrn	-0.74958	0.970835	0.0712478	0.0692574	0.0355731	0.0486833	2.36426	2.44532	2.07341	2.23022
ENSMUSG00000032494	Tdgf1	0.2599	0.970835	3.85476	4.04226	5.28057	4.28205	65.0701	73.1909	81.7172	73.701
ENSMUSG00000059920	4930453N24Rik	-0.561872	0.973731	0.248414	0.243992	0.188287	0.148958	2.21478	1.9821	1.90117	2.02854
ENSMUSG00000035683	Melk	-0.56884	0.974121	0.0710265	0.0759023	0.0564902	0.0436722	1.1601	1.26782	1.13219	1.13053
ENSMUSG00000057572	Zbtb8os	-0.766097	0.974606	0.129424	0.146777	0.0888523	0.0752892	2.63471	2.4077	2.43671	2.38137
ENSMUSG00000061979	Rcc1l	-0.657112	0.974606	0.111252	0.133403	0.074231	0.0823688	1.25412	1.2099	1.33616	1.1916
ENSMUSG00000074194	Zfp791	-0.757669	0.974606	0.299608	0.150025	0.15707	0.112062	2.09726	2.0601	2.11521	1.60501
ENSMUSG00000038421	Fcrla	-0.539599	0.978789	0.452787	0.632753	0.365191	0.388717	14.1525	13.5962	12.2999	13.6997
ENSMUSG00000025873	Faf2	-0.557589	0.978789	0.10443	0.124605	0.0864436	0.0708744	0.86567	0.971665	1.00971	0.892769
ENSMUSG00000023020	Cox14	-0.744463	0.978789	0.867105	0.84903	0.326567	0.703477	34.5945	34.7418	31.8991	32.4817
ENSMUSG00000004071	Cdip1	-0.333731	0.978789	0.338875	0.378347	0.299906	0.275064	3.19677	2.99214	2.88469	2.64667
ENSMUSG00000033031	Cip2a	-0.533848	0.978789	0.186636	0.258518	0.175006	0.135934	3.34579	3.73391	3.0984	3.27889
ENSMUSG00000018995	Nars2	-0.693586	0.978789	0.0266745	0.0281924	0.0161356	0.0181034	0.206214	0.230708	0.181525	0.184748
ENSMUSG00000038416	Cdc16	-0.391567	0.978789	0.380714	0.462777	0.324282	0.32501	8.04768	8.40676	7.28274	7.89774
ENSMUSG00000031753	Cog4	-0.476726	0.978789	0.171216	0.227032	0.160999	0.128374	3.3591	3.50405	3.09887	3.16804
ENSMUSG00000028309	Rnf20	-0.715998	0.979057	0.0980642	0.162541	0.0734434	0.086626	1.6741	1.70668	1.58107	1.56349
ENSMUSG00000022019	Tdrd3	-0.546156	0.982338	0.0392218	0.0404689	0.0240285	0.0310045	0.182133	0.195325	0.193804	0.170117
ENSMUSG00000115463	Gm49356	-0.572073	0.982338	0.0858229	0.131759	0.0644263	0.0831307	3.29753	3.82211	3.253	3.22678
ENSMUSG00000039748	Exo1	-0.540711	0.9844	0.155351	0.14715	0.111059	0.0990437	1.55351	1.52001	1.60881	1.62144
ENSMUSG00000071646	Mta2	-0.756528	0.9844	0.284102	0.306156	0.243368	0.1109	7.35323	6.62318	7.65148	6.87073
ENSMUSG00000070372	Capza1	-0.585265	0.9844	0.0946757	0.165791	0.0754241	0.0995313	1.24471	1.33143	1.04499	1.23091
ENSMUSG00000060438	Rps10-ps1	0.583183	0.985773	5.98565	5.59026	9.12684	8.39019	350.219	309.4	385.481	376.709
ENSMUSG00000028771	Ptpn12	-0.610731	0.987544	0.0620657	0.062229	0.0512988	0.0311177	0.399234	0.460956	0.419184	0.390868
ENSMUSG00000025410	Dctn2	0.789641	0.988152	0.0969324	0.0922034	0.133557	0.195671	5.57361	5.47073	6.14364	5.70145
ENSMUSG00000044533	Rps2	0.433503	0.988152	1.70602	1.52083	2.0097	2.3846	100.472	63.4701	97.8499	108.106
ENSMUSG00000027236	Eif3j1	-0.661103	0.988152	0.118044	0.123301	0.0868555	0.0674641	1.47244	1.71863	1.42045	1.57229
ENSMUSG00000028229	Rmdn1	-0.720974	0.988152	0.0768007	0.108872	0.0575184	0.0562597	0.256002	0.323266	0.231671	0.198564
ENSMUSG00000012483	Rpa3	-0.600892	0.988152	1.30976	1.18329	0.815196	0.84426	58.3652	56.3704	55.9193	54.471
ENSMUSG00000060404	Or2w1b	-1.05984	0.988562	0.19841	0.216691	0.146691	0.0552438	0.579968	0.796862	0.666775	0.345274
ENSMUSG00000005615	Pcyt1a	-1.01019	0.988562	0.0315811	0.0385703	0.0160965	0.0190519	0.447399	0.397757	0.436906	0.404853
ENSMUSG00000083097	Gm14494	-0.328907	0.988562	39.532	58.72	37.9253	40.9694	650.008	819.634	614.974	692.009
ENSMUSG00000108045	Gm5576	-0.884157	0.988995	1.78612	1.76522	1.35529	0.595469	31.1162	33.4962	26.8182	28.9653
ENSMUSG00000030744	Rps3	-0.233907	0.990594	6.54239	7.65939	5.94231	6.24415	283.212	269.572	274.658	290.623
ENSMUSG00000040725	Hnrnpul1	0.838163	0.9929	0.038047	0.0364345	0.0815982	0.0532083	0.880269	0.738195	1.02602	0.876373
ENSMUSG00000074781	Ube2n	-0.642276	0.993264	0.110431	0.144753	0.0665442	0.0982064	1.63932	1.90795	1.3758	1.60921
ENSMUSG00000018363	Smurf2	-0.395463	0.993264	0.102166	0.120547	0.101372	0.0699908	0.462921	0.470555	0.457939	0.407931
ENSMUSG00000000682	Cd52	-0.763613	0.995442	0.165529	0.261126	0.120526	0.133145	1.58632	1.57939	1.54274	1.30648
ENSMUSG00000108129	4930417O13Rik	-0.721844	0.995442	0.101225	0.122222	0.0723644	0.0645355	0.800595	1.00938	0.838221	0.741117
ENSMUSG00000026492	Tfb2m	-0.624239	0.996144	0.232856	0.19284	0.122633	0.15587	1.0335	0.894075	0.724648	0.76203
ENSMUSG00000042426	Dhx29	-0.577597	0.996653	0.0913395	0.11916	0.0761805	0.0663733	1.06148	1.11934	1.10401	1.01313
ENSMUSG00000022684	Bfar	-0.502784	0.996653	0.188439	0.169256	0.135876	0.119198	1.11051	1.14625	1.04864	0.93372
ENSMUSG00000037089	Slc35b2	-0.665405	0.996653	0.933086	0.798646	0.534614	0.567517	13.1244	14.7119	14.8088	13.4266
ENSMUSG00000024732	Ccdc86	-0.540401	0.996653	0.8357	0.574115	0.541127	0.438883	7.1706	5.51561	5.822	6.40094
ENSMUSG00000058388	Phtf1	-0.937527	0.996653	0.0257112	0.0367396	0.016175	0.0167517	0.34453	0.449354	0.402578	0.351785
ENSMUSG00000051675	Trim32	0.905987	0.996653	0.0980916	0.0851213	0.212014	0.135481	1.00673	0.803924	1.06909	0.967056
ENSMUSG00000059343	Aldoart1	-0.750005	0.996653	1.24572	1.27073	0.742129	0.768588	69.4491	69.138	61.0277	70.9663
ENSMUSG00000037313	Tacc3	-0.563143	0.996653	0.219934	0.216757	0.167843	0.131	8.55795	8.40251	7.677	7.59802
ENSMUSG00000107906	Eif4a3l2	-0.797052	0.996653	1.45027	2.14892	0.931748	1.15796	24.5693	31.804	23.331	26.4015
ENSMUSG00000040855	Reps2	-0.846107	0.996653	0.00827451	0.0121728	0.00766805	0.00385727	0.164487	0.163989	0.154237	0.131601
ENSMUSG00000098104	Gm6085	-0.270068	0.999551	1.58085	2.02724	2.10643	0.929835	51.3379	45.5767	53.9385	46.4917
ENSMUSG00000103922	Gm6123	-0.463581	0.999551	2.71731	2.48901	1.99438	1.81959	107.116	132.963	90.3642	101.405
ENSMUSG00000033845	Mrpl15	0.0421703	0.999551	0.889935	0.870359	0.976029	0.855638	22.4199	20.1414	19.6137	22.7457
ENSMUSG00000025903	Lypla1	-0.174143	0.999551	0.170185	0.163747	0.1487	0.150119	3.3608	3.2579	3.09396	3.3958
ENSMUSG00000104217	Gm37988	-0.270445	0.999551	0.114897	0.127507	0.102322	0.100639	2.14917	2.05158	1.92611	2.11408
ENSMUSG00000033813	Tcea1	-0.320862	0.999551	0.0854865	0.131392	0.0848221	0.0904686	1.45327	1.41877	1.20017	1.33736
ENSMUSG00000033793	Atp6v1h	0.303521	0.999551	0.102361	0.0931861	0.127299	0.116495	1.41736	1.39607	1.46723	1.4201
ENSMUSG00000025907	Rb1cc1	-0.248396	0.999551	0.0338094	0.060427	0.0489949	0.0313405	0.409011	0.505321	0.451762	0.421604
ENSMUSG00000051285	Pcmtd1	0.19879	0.999551	0.0240041	0.0282694	0.0263669	0.0341337	0.229068	0.275784	0.250485	0.255071
ENSMUSG00000025909	Sntg1	-0.00807157	0.999551	0.0100293	0.00941352	0.0091418	0.0103641	0.15954	0.176362	0.169367	0.167506
ENSMUSG00000084353	Gm15452	-0.085843	0.999551	26.3853	25.9423	23.6888	26.0667	221.007	230.377	191.837	223.867
ENSMUSG00000025912	Mybl1	0.495022	0.999551	0.0549162	0.0697742	0.0959665	0.0817546	0.299382	0.33589	0.393153	0.325415
ENSMUSG00000045210	Vcpip1	0.197093	0.999551	0.132742	0.173444	0.168859	0.185478	0.794499	0.920861	0.736837	0.729545
ENSMUSG00000097893	1700034P13Rik	-0.265719	0.999551	0.161378	0.216321	0.178835	0.138908	1.27397	1.48781	1.40546	1.14451
ENSMUSG00000098234	Snhg6	-0.233029	0.999551	0.188369	0.210819	0.165747	0.177059	2.36258	1.81596	2.26831	2.45061
ENSMUSG00000046101	Mcmdc2	0.169207	0.999551	0.0399489	0.0238647	0.0394583	0.0330064	1.46595	1.15505	1.41898	1.44757
ENSMUSG00000025917	Cops5	-0.482949	0.999551	0.432466	0.31769	0.246924	0.294474	11.227	10.3112	10.165	10.6708
ENSMUSG00000056763	Cspp1	-0.0458687	0.999551	0.047638	0.0554873	0.0508736	0.0500264	0.232309	0.324843	0.292395	0.291111
ENSMUSG00000067851	Arfgef1	-0.339634	0.999551	0.0470389	0.0514804	0.0416341	0.0370377	0.376311	0.414641	0.354424	0.346054
ENSMUSG00000048960	Prex2	0.358816	0.999551	0.00337096	0.0029162	0.00441808	0.00372826	0.018353	0.0192126	0.0229086	0.0166077
ENSMUSG00000057715	A830018L16Rik	-0.174575	0.999551	0.00423986	0.00359947	0.0030721	0.00393024	0.0268869	0.0313533	0.0297271	0.0316291
ENSMUSG00000016918	Sulf1	0.0257317	0.999551	0.00722263	0.00787596	0.00901542	0.00653579	0.0567492	0.0639528	0.0712218	0.0538425
ENSMUSG00000042414	Prdm14	-0.212745	0.999551	0.165298	0.163058	0.148133	0.138073	2.01749	2.15857	1.96647	1.8218
ENSMUSG00000005886	Ncoa2	-0.274045	0.999551	0.0140926	0.023779	0.016202	0.0154372	0.123867	0.130445	0.123783	0.120366
ENSMUSG00000025935	Tram1	-0.0390644	0.999551	0.126732	0.0907566	0.130865	0.0834037	2.27886	2.43776	2.80454	2.41871
ENSMUSG00000025937	Lactb2	0.0613244	0.999551	0.101466	0.148705	0.155489	0.108767	3.15012	3.14569	3.00202	3.27856
ENSMUSG00000025932	Eya1	-0.334955	0.999551	0.00945775	0.00866314	0.00934161	0.00520944	0.0468775	0.0455756	0.0452709	0.0409313
ENSMUSG00000025930	Msc	-0.0687599	0.999551	0.746228	0.583013	0.786258	0.496519	3.51166	2.97538	4.41072	3.61466
ENSMUSG00000043716	Rpl7	0.0667	0.999551	2.38042	2.18043	2.54712	2.27893	101.461	92.0045	97.8156	100.413
ENSMUSG00000025939	Ube2w	0.245857	0.999551	0.0553647	0.0507132	0.0580501	0.0688038	0.508617	0.482789	0.455371	0.50701
ENSMUSG00000079658	Eloc	-0.314287	0.999551	0.75474	0.646167	0.546786	0.590304	17.6321	14.5283	15.2106	16.477
ENSMUSG00000025940	Tmem70	-0.319543	0.999551	0.124469	0.122156	0.0660301	0.132746	1.57365	1.59617	1.20019	1.39584
ENSMUSG00000100204	Gm4849	-0.0976603	0.999551	0.672528	0.710797	0.74583	0.56176	13.1402	18.6703	14.6454	13.9036
ENSMUSG00000041859	Mcm3	-0.279718	0.999551	0.850758	0.926546	0.816517	0.663773	16.2347	16.868	16.0757	15.4941
ENSMUSG00000041779	Tram2	-0.402587	0.999551	0.0147112	0.0154003	0.0122419	0.0107766	0.112086	0.144378	0.125479	0.107766
ENSMUSG00000026155	Smap1	0.484908	0.999551	0.0202472	0.0240413	0.0432449	0.019679	0.577421	0.566687	0.62443	0.617513
ENSMUSG00000026154	Sdhaf4	0.251992	0.999551	0.292931	0.169754	0.224609	0.329991	6.38471	5.09261	5.62045	5.85329
ENSMUSG00000026153	Fam135a	0.438081	0.999551	0.0156226	0.0184839	0.0267319	0.0200274	0.182264	0.18782	0.172335	0.170233
ENSMUSG00000100862	Gm10925	0.253124	0.999551	4.88418	7.77033	6.43879	8.7619	20.9077	29.904	27.6269	47.4538
ENSMUSG00000102070	Gm28661	0.837481	0.999551	1.02372	1.64099	3.05613	1.77554	4.77736	7.03282	9.83926	10.576
ENSMUSG00000073725	Lmbrd1	-0.674334	0.999551	0.0145784	0.0303489	0.0115799	0.0167898	0.0907834	0.112291	0.100745	0.0869474
ENSMUSG00000086240	Gm7846	-0.41776	0.999551	7.84509	5.63225	5.00206	5.18039	391.194	299.286	308.275	378.744
ENSMUSG00000081557	Gm5697	0.283456	0.999551	0.468139	0.664652	0.715816	0.677794	2.62158	2.5514	2.51558	2.457
ENSMUSG00000048874	Phf3	0.00829234	0.999551	0.0941445	0.127865	0.13048	0.0954736	0.699591	0.788751	0.804153	0.707973
ENSMUSG00000026064	Ptp4a1	0.158422	0.999551	0.264425	0.271746	0.264853	0.338493	2.03801	2.68793	1.97794	2.13601
ENSMUSG00000117310	Ptp4a1	0.158422	0.999551	0.251551	0.258516	0.251959	0.322013	1.96333	2.55706	1.89773	2.07643
ENSMUSG00000004768	Rab23	0.00395542	0.999551	0.122965	0.0938619	0.134302	0.0857722	1.01703	0.804866	0.906537	0.848449
ENSMUSG00000042197	Zfp451	-0.204442	0.999551	0.102939	0.132408	0.105253	0.101078	0.78628	0.782412	0.80375	0.780876
ENSMUSG00000081402	Gm15455	-0.307696	0.999551	0.56801	0.499476	0.39704	0.472875	1.79491	2.41413	1.64772	2.17934
ENSMUSG00000042182	Bend6	-0.335275	0.999551	0.0572991	0.0753875	0.0582577	0.0480793	0.214611	0.235705	0.2303	0.163093
ENSMUSG00000026131	Dst	-0.0491299	0.999551	0.0264049	0.0409308	0.0321984	0.0334777	0.229084	0.268177	0.262531	0.241433
ENSMUSG00000037503	Fam168b	0.0366408	0.999551	0.142092	0.123022	0.147963	0.126818	1.21459	1.12146	1.24663	1.06386
ENSMUSG00000045216	Hs6st1	0.083281	0.999551	0.116049	0.0671359	0.133418	0.0635605	0.482518	0.405613	0.623063	0.451832
ENSMUSG00000037470	Uggt1	-0.046322	0.999551	0.0227514	0.0259228	0.0281217	0.0195836	0.293549	0.349704	0.37237	0.263625
ENSMUSG00000010453	Kansl3	0.0684672	0.999551	0.0729414	0.0986288	0.098634	0.083292	0.738097	0.779486	0.972683	0.746485
ENSMUSG00000046337	Fam178b	0.160631	0.999551	0.015429	0.0136911	0.0189579	0.0139618	0.145611	0.136027	0.161774	0.152271
ENSMUSG00000026116	Tmem131	0.315952	0.999551	0.0291485	0.0270509	0.0402136	0.0305414	0.269624	0.291587	0.349188	0.256478
ENSMUSG00000050122	Vwa3b	-0.24883	0.999551	0.0176794	0.0128892	0.0132407	0.0127333	0.291169	0.293146	0.249051	0.267399
ENSMUSG00000026111	Unc50	-0.533569	0.999551	0.336189	0.35532	0.248555	0.234015	5.66349	6.37799	5.25354	5.5403
ENSMUSG00000026110	Mgat4a	-0.145762	0.999551	0.0171414	0.0136077	0.0119819	0.0160283	0.109133	0.130843	0.107837	0.0941019
ENSMUSG00000058407	Txndc9	-0.207121	0.999551	0.896248	0.917284	0.779104	0.806881	11.0568	11.3299	10.1683	10.0964
ENSMUSG00000026083	Eif5b	-0.250518	0.999551	0.158435	0.151594	0.12697	0.136063	4.47653	4.60975	4.6009	4.54487
ENSMUSG00000026082	Rev1	0.171761	0.999551	0.101836	0.1223	0.136435	0.118773	0.485793	0.536185	0.543102	0.522874
ENSMUSG00000037138	Aff3	-0.111682	0.999551	0.00238279	0.00261912	0.00208197	0.00258744	0.0123905	0.0150599	0.0151984	0.0149856
ENSMUSG00000026077	Npas2	-0.524884	0.999551	0.00582654	0.010674	0.00568989	0.00589275	0.0250198	0.0273129	0.0251553	0.0291536
ENSMUSG00000073702	Rpl31	0.113125	0.999551	0.499598	0.470698	0.424053	0.632924	15.4019	12.9573	15.5029	16.0814
ENSMUSG00000003135	Cnot11	-0.208191	0.999551	0.13672	0.178904	0.170656	0.106044	2.05568	2.08423	2.56411	2.20042
ENSMUSG00000085894	Gm15832	-0.512029	0.999551	0.799427	1.05638	0.698502	0.616673	5.42562	6.62637	7.23694	5.37217
ENSMUSG00000048234	Rnf149	-0.0413213	0.999551	0.137953	0.173239	0.173029	0.132888	1.20153	1.48374	1.71085	1.32284
ENSMUSG00000026074	Map4k4	-0.131372	0.999551	0.0301141	0.0415882	0.0364324	0.0297658	0.387776	0.417155	0.460667	0.37354
ENSMUSG00000060679	Mrps9	0.0795981	0.999551	0.0437446	0.0645019	0.0605959	0.0550324	1.5492	1.52263	1.50184	1.59497
ENSMUSG00000010290	AI597479	-0.707719	0.999551	0.0943665	0.114222	0.0618398	0.0670943	0.768413	0.901426	0.798027	0.808181
ENSMUSG00000066877	Nck2	-0.134896	0.999551	0.0166072	0.0194374	0.0177351	0.0154454	0.0747323	0.0798625	0.0894819	0.0918373
ENSMUSG00000041763	Tpp2	-0.153853	0.999551	0.0954949	0.110491	0.105397	0.0818657	1.25484	1.26757	1.24939	1.1825
ENSMUSG00000026049	Tex30	-0.291625	0.999551	0.847823	0.843829	0.660616	0.733987	5.98981	6.50185	5.56072	5.65934
ENSMUSG00000101104	Gm29247	-0.481226	0.999551	0.186359	0.2533	0.15758	0.160478	2.10706	2.33476	2.02752	1.79789
ENSMUSG00000026047	Poglut2	0.235651	0.999551	0.0852751	0.117166	0.107625	0.132897	1.99449	2.47784	2.05315	1.83055
ENSMUSG00000026048	Ercc5	-0.716259	0.999551	0.0519999	0.0635081	0.0333191	0.037644	0.578933	0.736694	0.680012	0.617989
ENSMUSG00000101567	Txn-ps1	-0.113844	0.999551	35.9105	33.9267	33.0197	32.1553	888.738	775.837	829.928	892.863
ENSMUSG00000084817	Gm5526	-0.519831	0.999551	3.98294	4.90635	2.52008	3.72847	97.9255	134.862	95.643	117.074
ENSMUSG00000101337	Dnah7c	0.493228	0.999551	0.00273833	0.00250827	0.00345602	0.00399223	0.019929	0.0189514	0.0248568	0.0199611
ENSMUSG00000025986	Slc39a10	0.166524	0.999551	0.0238353	0.0230803	0.0285616	0.0246499	0.296919	0.361799	0.376655	0.334622
ENSMUSG00000026107	Nabp1	0.0133953	0.999551	0.300561	0.419316	0.399984	0.334743	1.71551	1.90175	2.02416	1.7574
ENSMUSG00000018417	Myo1b	-0.234762	0.999551	0.0234051	0.0271984	0.0225869	0.0208633	0.296931	0.339179	0.32049	0.315478
ENSMUSG00000062939	Stat4	-0.060475	0.999551	0.00483964	0.014629	0.0105716	0.00832089	0.0600116	0.0727017	0.0672356	0.0665672
ENSMUSG00000101628	Gm28177	0.575705	0.999551	0.00884408	0.0162021	0.0231826	0.0146723	0.12308	0.157295	0.14296	0.14739
ENSMUSG00000026103	Gls	0.291076	0.999551	0.0790876	0.0777808	0.0989264	0.0949201	0.597735	0.713753	0.677209	0.621501
ENSMUSG00000041426	Hibch	-0.250849	0.999551	0.0611071	0.0797617	0.0707451	0.0490753	0.494968	0.607308	0.544604	0.487297
ENSMUSG00000043629	1700019D03Rik	0.0705967	0.999551	0.134767	0.185983	0.175852	0.164393	0.653058	0.867376	0.775513	0.763407
ENSMUSG00000060715	1700019A02Rik	-0.374364	0.999551	0.033986	0.0549364	0.0349357	0.0343722	0.131946	0.119029	0.117035	0.101308
ENSMUSG00000026098	Pms1	-0.202191	0.999551	0.0188568	0.023688	0.0188299	0.0185262	0.323797	0.2961	0.233491	0.269604
ENSMUSG00000026097	Ormdl1	-0.416742	0.999551	0.175849	0.189263	0.161331	0.115367	2.07941	2.13021	1.97054	1.82598
ENSMUSG00000100679	Gm28778	-0.336478	0.999551	0.151038	0.163834	0.140652	0.111498	1.83233	1.89137	1.71908	1.75879
ENSMUSG00000026096	Osgepl1	-0.252866	0.999551	0.164423	0.179894	0.155637	0.136388	2.05072	2.12525	1.90356	2.14088
ENSMUSG00000026094	Stk17b	-0.0847509	0.999551	0.195485	0.173689	0.169097	0.182202	0.586454	0.648199	0.590986	0.654511
ENSMUSG00000041303	Gtf3c3	0.0217086	0.999551	0.0946454	0.100317	0.0945105	0.105221	1.36425	1.45893	1.30661	1.5098
ENSMUSG00000073678	Pgap1	-0.24632	0.999551	0.0432165	0.0609493	0.0503474	0.0384861	0.223628	0.287153	0.288898	0.237124
ENSMUSG00000025982	Sf3b1	-0.221783	0.999551	0.303435	0.329505	0.295119	0.253458	7.56527	8.63126	7.67908	7.81744
ENSMUSG00000025981	Coq10b	-0.223673	0.999551	0.253567	0.189548	0.198636	0.184618	1.49809	1.21471	1.27076	1.31607
ENSMUSG00000025980	Hspd1	0.0042891	0.999551	2.05951	2.20345	2.1555	2.16165	47.0227	48.4912	48.3769	46.7178
ENSMUSG00000073676	Hspe1	0.0489472	0.999551	3.25601	2.94894	3.10068	3.37675	88.7721	68.6635	85.7961	86.5376
ENSMUSG00000025979	Mob4	-0.115922	0.999551	0.454086	0.490129	0.469677	0.410905	3.92478	3.79738	3.62016	4.01798
ENSMUSG00000038331	Satb2	0.334656	0.999551	0.0050335	0.0103739	0.00879608	0.0108177	0.031774	0.0348677	0.0398572	0.0355847
ENSMUSG00000038323	1700066M21Rik	0.359582	0.999551	0.133999	0.225025	0.195137	0.269459	0.826328	1.05012	0.715502	1.00373
ENSMUSG00000048495	Tyw5	-0.118961	0.999551	0.172456	0.2708	0.180282	0.231297	2.4575	2.78698	2.25488	2.81737
ENSMUSG00000025971	Maip1	-0.318828	0.999551	0.394769	0.379911	0.301269	0.325576	3.31806	3.56567	3.11311	3.19245
ENSMUSG00000054770	Kctd18	-0.208776	0.999551	0.0254743	0.0125004	0.0166937	0.0164656	0.527683	0.570851	0.493657	0.535132
ENSMUSG00000026039	Sgo2a	-0.418245	0.999551	0.197995	0.192029	0.154342	0.140523	1.57037	1.71048	1.61466	1.60548
ENSMUSG00000051223	Bzw1	-0.143287	0.999551	1.24182	1.66757	1.36947	1.29101	28.7346	30.7157	26.4132	28.4932
ENSMUSG00000026034	Clk1	-0.243107	0.999551	0.77026	1.23087	0.881507	0.825808	3.73827	4.22561	4.00884	3.70477
ENSMUSG00000026035	Ppil3	-0.758635	0.999551	0.124265	0.168902	0.0805573	0.0943115	3.48745	3.39639	3.14174	3.05787
ENSMUSG00000038174	Hycc2	0.332643	0.999551	0.0484759	0.0544566	0.0655319	0.0653853	0.186586	0.211962	0.264525	0.221813
ENSMUSG00000026032	Ndufb3	-0.0222341	0.999551	0.254674	0.388796	0.34438	0.296301	7.86458	7.13162	8.05319	7.41849
ENSMUSG00000026029	Casp8	-0.343752	0.999551	0.0390056	0.0367493	0.0331075	0.0272286	0.16048	0.21335	0.18696	0.154296
ENSMUSG00000102719	Gm37760	-0.422034	0.999551	0.484008	0.443343	0.356825	0.342173	1.64865	2.09202	1.75769	1.36869
ENSMUSG00000026028	Trak2	0.584567	0.999551	0.0167167	0.0196871	0.028517	0.0266524	0.180699	0.171351	0.186404	0.190888
ENSMUSG00000038079	Tmem237	-0.370898	0.999551	0.0820773	0.0724964	0.0461027	0.0742721	1.91123	1.82315	1.71348	1.76396
ENSMUSG00000026024	Als2	-0.0171801	0.999551	0.0461291	0.0472666	0.0457706	0.0474024	0.423762	0.470517	0.46727	0.419547
ENSMUSG00000041075	Fzd7	0.0335128	0.999551	0.512763	0.375746	0.548835	0.371201	1.56393	1.54995	2.13934	1.71681
ENSMUSG00000047361	Gm973	-0.757143	0.999551	0.0183735	0.015944	0.0126741	0.0078756	0.15134	0.152354	0.128431	0.114196
ENSMUSG00000067336	Bmpr2	0.074868	0.999551	0.0100499	0.0243947	0.0180014	0.0186432	0.114067	0.144067	0.138742	0.119134
ENSMUSG00000041040	Fam117b	0.32114	0.999551	0.0216833	0.0264821	0.0287697	0.0319755	0.248957	0.253787	0.299626	0.309581
ENSMUSG00000026019	Wdr12	-0.0558766	0.999551	0.122791	0.114318	0.124877	0.105649	3.22275	3.35947	2.82292	3.13305
ENSMUSG00000026017	Carf	-0.644046	0.999551	0.0511014	0.0563607	0.036449	0.03303	0.349367	0.319059	0.315284	0.308594
ENSMUSG00000073664	Nbeal1	0.325317	0.999551	0.0246778	0.0296895	0.0337917	0.0349965	0.158748	0.177799	0.159304	0.162317
ENSMUSG00000049439	Cyp20a1	0.275932	0.999551	0.0272703	0.0428213	0.0374432	0.0481789	0.399964	0.446056	0.477684	0.399532
ENSMUSG00000026782	Abi2	-0.139598	0.999551	0.0438522	0.0386802	0.0283822	0.0470306	0.455576	0.4173	0.428572	0.440912
ENSMUSG00000026014	Raph1	0.0245609	0.999551	0.0342495	0.0765476	0.0586542	0.0551667	0.300026	0.412228	0.416564	0.347116
ENSMUSG00000120763	ENSMUSG00000120763	-0.271964	0.999551	0.322534	0.441747	0.316707	0.322439	0.568274	0.720301	0.534107	0.54481
ENSMUSG00000101188	Eif4a-ps4	0.0972232	0.999551	19.8423	17.5636	19.0043	21.3652	610.104	532.98	570.255	654.985
ENSMUSG00000120928	ENSMUSG00000120928	0.428264	0.999551	14.2778	13.0783	19.3582	17.8208	18.2166	15.3331	24.5204	24.9491
ENSMUSG00000026011	Ctla4	0.176381	0.999551	0.0987309	0.0664426	0.0897875	0.0984586	1.98671	1.34915	1.84152	1.99105
ENSMUSG00000052062	Pard3b	0.256524	0.999551	0.0012737	0.000901535	0.00136584	0.00125736	0.00926331	0.0125154	0.0107749	0.00827763
ENSMUSG00000025969	Nrp2	-0.0727746	0.999551	0.00855753	0.0156771	0.0114357	0.0118434	0.0639298	0.0839186	0.0985227	0.0856368
ENSMUSG00000040865	Ino80d	-0.232263	0.999551	0.0520464	0.0650405	0.0584688	0.0423873	0.197033	0.219639	0.251091	0.2116
ENSMUSG00000084799	Ino80dos	-0.402717	0.999551	0.111782	0.0706144	0.0707268	0.0685977	2.64937	2.84105	2.71232	2.66368
ENSMUSG00000025968	Ndufs1	-0.471895	0.999551	0.166049	0.198528	0.137449	0.128115	4.22987	4.54212	4.03949	4.22937
ENSMUSG00000025967	Eef1b2	-0.0724532	0.999551	7.0756	7.52741	7.19423	6.83342	249.169	226.636	257.01	253.956
ENSMUSG00000027520	Zdbf2	0.160729	0.999551	0.097033	0.14427	0.137619	0.13489	1.0308	1.09362	1.12675	1.01549
ENSMUSG00000025964	Adam23	0.368926	0.999551	0.0166115	0.0237084	0.0310539	0.0216737	0.101987	0.146496	0.153582	0.123051
ENSMUSG00000025962	Fastkd2	-0.253813	0.999551	0.178817	0.216915	0.166798	0.168372	2.33911	2.87302	2.3014	2.56931
ENSMUSG00000025959	Klf7	0.0630524	0.999551	0.0219027	0.0183429	0.0278862	0.0147233	0.0763467	0.0768109	0.09022	0.082111
ENSMUSG00000025958	Creb1	-0.224629	0.999551	0.0371665	0.034784	0.0367101	0.0255897	0.33369	0.330818	0.332509	0.301227
ENSMUSG00000087213	2810408I11Rik	0.289776	0.999551	0.144838	0.117928	0.16405	0.16019	1.08897	0.874633	1.07335	1.32035
ENSMUSG00000070871	Ccnyl1	0.210639	0.999551	0.044575	0.0408299	0.0504875	0.0492997	0.315327	0.396202	0.377935	0.354062
ENSMUSG00000045005	Fzd5	-0.0918006	0.999551	1.44554	1.68655	1.67935	1.29346	5.25723	5.87333	6.49162	6.01422
ENSMUSG00000051344	Plekhm3	0.382286	0.999551	0.00544092	0.00965609	0.0109937	0.00892387	0.0442074	0.0420507	0.0430833	0.0409267
ENSMUSG00000084416	Rpl10a-ps1	0.102979	0.999551	18.477	23.2714	24.8375	20.498	678.853	680.16	707.247	749.665
ENSMUSG00000100846	Gm28845	-0.0605938	0.999551	0.0705496	0.115196	0.136686	0.0444109	0.957021	1.1632	1.06401	0.918751
ENSMUSG00000044816	D630023F18Rik	0.186153	0.999551	0.0550827	0.0712304	0.10192	0.0439805	0.845682	1.06549	0.934263	0.841494
ENSMUSG00000025950	Idh1	0.215013	0.999551	0.152089	0.150762	0.189321	0.165906	4.96686	4.90071	4.13411	4.32109
ENSMUSG00000025949	Pikfyve	-0.333554	0.999551	0.0460914	0.0572559	0.0457893	0.0371376	0.270866	0.305365	0.268116	0.246251
ENSMUSG00000026005	Rpe	0.131304	0.999551	0.202073	0.283253	0.302296	0.235498	4.15475	4.35255	3.98602	4.14753
ENSMUSG00000026004	Kansl1l	0.552992	0.999551	0.00945468	0.0156968	0.0185874	0.0187153	0.245822	0.326386	0.343866	0.279126
ENSMUSG00000053153	Spag16	-0.401935	0.999551	0.00336353	0.00551013	0.00344755	0.00333633	0.0172704	0.0181894	0.0176899	0.0180279
ENSMUSG00000026196	Bard1	-0.0186037	0.999551	0.0337906	0.0429102	0.0496551	0.0271026	0.308723	0.346096	0.320074	0.322452
ENSMUSG00000026192	Atic	0.344923	0.999551	0.0568505	0.123084	0.133215	0.0982119	2.09055	1.74922	2.5514	2.34072
ENSMUSG00000026193	Fn1	-0.0225742	0.999551	0.193136	0.251604	0.242254	0.200402	4.47388	5.4944	6.09985	4.60148
ENSMUSG00000100319	Gm5256	-0.492064	0.999551	1.39113	1.82035	0.983977	1.31878	38.4878	51.8801	31.8345	35.4273
ENSMUSG00000039395	Mreg	0.1951	0.999551	0.269238	0.235545	0.289018	0.294351	1.87148	1.73438	2.11435	2.03162
ENSMUSG00000121277	ENSMUSG00000121277	-0.684321	0.999551	0.0806623	0.0598119	0.0536982	0.034758	0.72404	0.728298	0.652769	0.676042
ENSMUSG00000026189	Pecr	-0.753948	0.999551	0.0808558	0.0719465	0.062574	0.0292667	1.82734	1.83675	1.70766	1.85008
ENSMUSG00000026187	Xrcc5	-0.496299	0.999551	0.0517731	0.0595831	0.0388573	0.0408434	1.54855	1.59658	1.49804	1.6043
ENSMUSG00000039354	Smarcal1	-0.5215	0.999551	0.0326094	0.0277362	0.0213695	0.0210775	0.372679	0.372305	0.377527	0.381502
ENSMUSG00000046330	Rpl37a	-0.42399	0.999551	2.00252	1.5391	1.24692	1.41635	46.3802	32.8693	44.2254	47.0518
ENSMUSG00000039323	Igfbp2	0.0152292	0.999551	0.097616	0.133171	0.130661	0.105248	4.8808	5.87854	6.42414	5.56875
ENSMUSG00000006304	Arpc2	-0.163074	0.999551	0.282107	0.255093	0.233852	0.250371	8.22633	8.25739	8.04102	8.41935
ENSMUSG00000006299	Aamp	-0.0638549	0.999551	1.17402	1.20573	1.13978	1.15895	47.9568	40.9731	44.1198	45.4245
ENSMUSG00000026179	Pnkd	-0.32413	0.999551	0.0363285	0.0564923	0.0413386	0.0336384	1.24784	1.31558	1.35163	1.17276
ENSMUSG00000033364	Usp37	-0.11803	0.999551	0.0822512	0.0841468	0.0770006	0.0778127	1.62954	1.52932	1.74721	1.61328
ENSMUSG00000026174	Cnot9	0.403629	0.999551	0.267216	0.272677	0.393231	0.32877	4.81223	4.53675	5.37825	5.03761
ENSMUSG00000026135	Zfp142	-0.40643	0.999551	0.105538	0.0874641	0.0812361	0.0659417	0.505074	0.446527	0.498395	0.411567
ENSMUSG00000033257	Ttll4	-0.204037	0.999551	0.055348	0.0633723	0.0604506	0.0438241	0.850976	0.916364	0.929731	0.755027
ENSMUSG00000047021	Cfap65	1.48112	0.999551	0.053714	0.0333298	0.0484468	0.194424	0.142082	0.131732	0.169564	1.69651
ENSMUSG00000026162	Nhej1	-0.30842	0.999551	0.0188491	0.0128099	0.0154069	0.0104541	0.251119	0.272906	0.230042	0.266854
ENSMUSG00000026197	Zfand2b	0.115253	0.999551	0.584076	0.677671	0.765507	0.616622	9.63725	8.11422	9.61136	8.91459
ENSMUSG00000026201	Stk16	-0.511802	0.999551	0.633465	0.636036	0.447051	0.451966	16.6894	16.6374	16.6686	16.7999
ENSMUSG00000026202	Tuba4a	0.345581	0.999551	0.927394	1.00993	1.18846	1.2961	26.2865	25.0784	28.388	30.6775
ENSMUSG00000026209	Dnpep	-0.300898	0.999551	0.230197	0.231943	0.18605	0.192684	12.4076	12.3878	10.625	11.7745
ENSMUSG00000026235	Epha4	0.0585204	0.999551	0.104091	0.141399	0.139685	0.118718	0.395938	0.473489	0.51481	0.415513
ENSMUSG00000026245	Farsb	0.00994726	0.999551	0.0884674	0.112548	0.105928	0.0985858	2.65484	2.49632	2.3798	2.69888
ENSMUSG00000032883	Acsl3	0.00811354	0.999551	0.0872855	0.119395	0.106772	0.103207	0.903114	1.06496	1.04942	0.93729
ENSMUSG00000079470	Utp14b	0.0591145	0.999551	0.133653	0.110577	0.128081	0.128746	0.931261	0.912257	0.949308	0.963647
ENSMUSG00000073643	Wdfy1	-0.390481	0.999551	0.0684112	0.0993973	0.0776382	0.0519438	0.271286	0.308996	0.305056	0.242642
ENSMUSG00000026249	Serpine2	-0.0944923	0.999551	0.0173462	0.0429	0.0295549	0.0274692	0.289682	0.402783	0.383455	0.376721
ENSMUSG00000067106	Gm5529	-0.0177278	0.999551	1.63008	1.79175	1.82309	1.59307	62.8559	70.8339	48.084	57.4686
ENSMUSG00000004364	Cul3	-0.121055	0.999551	0.134556	0.140859	0.115554	0.139851	1.4609	1.6903	1.45786	1.45695
ENSMUSG00000087008	Gm5530	-0.419004	0.999551	1.8284	1.29661	1.1853	1.17418	12.9168	12.6419	9.01856	12.489
ENSMUSG00000026142	Rhbdd1	0.0382386	0.999551	0.011717	0.0107326	0.0110253	0.012234	0.0590357	0.0681106	0.0696956	0.0725882
ENSMUSG00000026159	Agfg1	-0.278106	0.999551	0.128056	0.163009	0.127521	0.115027	1.5621	1.69305	1.5936	1.61037
ENSMUSG00000045658	Pid1	-0.327871	0.999551	0.0129344	0.0150937	0.0108371	0.0117044	0.0678616	0.0616732	0.0633195	0.0649356
ENSMUSG00000026219	Trip12	0.00575305	0.999551	0.114899	0.153409	0.133574	0.138337	2.03215	2.37784	2.24311	2.17506
ENSMUSG00000073633	Fbxo36	-0.142511	0.999551	0.0708874	0.0658091	0.0652861	0.0598121	0.439693	0.445747	0.465373	0.412617
ENSMUSG00000052477	C130026I21Rik	-0.751766	0.999551	0.00459956	0.00651119	0.00383621	0.00283784	0.0535222	0.0520895	0.0511494	0.0491893
ENSMUSG00000036707	Cab39	0.156005	0.999551	0.0709512	0.10252	0.101286	0.0940455	0.898382	1.00872	0.964834	1.01822
ENSMUSG00000026227	2810459M11Rik	-0.384748	0.999551	1.07182	1.35894	1.19047	0.695911	6.72761	7.07204	7.037	5.35358
ENSMUSG00000026229	Psmd1	-0.171555	0.999551	0.117334	0.127406	0.114063	0.105473	3.62182	3.58373	3.70163	3.56219
ENSMUSG00000094638	Gm21972	-0.308825	0.999551	0.0637717	0.0730173	0.057462	0.0541007	2.05066	2.17227	2.4552	2.07206
ENSMUSG00000062590	Armc9	-0.0428434	0.999551	0.0079967	0.0133571	0.00986421	0.0110672	0.0851414	0.0934995	0.0908329	0.0949227
ENSMUSG00000026234	Ncl	-0.0459486	0.999551	2.01409	1.97898	1.94306	1.96221	54.1391	53.708	55.6054	54.7091
ENSMUSG00000026238	Ptma	0.138754	0.999551	15.2417	14.3749	17.8882	15.0844	551.832	493.283	575.757	559.786
ENSMUSG00000026240	Cops7b	0.162774	0.999551	0.0614494	0.0743788	0.0862901	0.0675215	1.53843	1.34083	1.6491	1.5808
ENSMUSG00000053333	Dis3l2	-0.00336174	0.999551	0.011576	0.0144452	0.0136327	0.0126006	0.930777	0.927415	0.81239	0.951116
ENSMUSG00000048000	Gigyf2	0.029522	0.999551	0.0492741	0.0494328	0.0590447	0.0428898	0.333656	0.335713	0.397732	0.346516
ENSMUSG00000026288	Inpp5d	-0.0471022	0.999551	0.0359491	0.0451443	0.0415431	0.0377774	0.307307	0.304857	0.35413	0.335799
ENSMUSG00000026289	Atg16l1	-0.25252	0.999551	0.0985244	0.129548	0.0999709	0.0934692	0.788196	0.850066	0.87058	0.806711
ENSMUSG00000070738	Dgkd	-0.728164	0.999551	0.0227595	0.0324291	0.018229	0.0154464	0.23771	0.243218	0.273435	0.267165
ENSMUSG00000005501	Usp40	-0.15083	0.999551	0.0238125	0.0268453	0.0288086	0.0174042	0.177678	0.189595	0.189657	0.174871
ENSMUSG00000044783	Hjurp	-0.094161	0.999551	0.498087	0.491334	0.538984	0.398715	3.75864	3.8289	4.03736	3.75485
ENSMUSG00000036206	Sh3bp4	-0.0136611	0.999551	0.0535296	0.0565756	0.0497698	0.0602385	0.47559	0.479007	0.526481	0.510474
ENSMUSG00000055013	Agap1	0.288377	0.999551	0.00485433	0.00889296	0.00768052	0.0092603	0.0464441	0.0485508	0.0541076	0.0483197
ENSMUSG00000034486	Gbx2	-0.10429	0.999551	1.00911	0.990354	1.14938	0.733782	3.2616	3.3507	4.21964	3.48954
ENSMUSG00000044337	Ackr3	-0.12442	0.999551	0.118266	0.12083	0.127182	0.0946714	0.35025	0.329156	0.457061	0.345756
ENSMUSG00000034432	Cops8	-0.189934	0.999551	0.672862	0.785822	0.641808	0.649468	11.4947	11.0888	10.8764	12.2892
ENSMUSG00000026305	Lrrfip1	0.215358	0.999551	0.0116006	0.0151216	0.0222215	0.00928624	0.255214	0.266467	0.270946	0.269705
ENSMUSG00000026309	Ilkap	0.432812	0.999551	0.109418	0.106622	0.138321	0.155892	2.13015	2.03861	2.23347	2.21619
ENSMUSG00000034292	Traf3ip1	-0.176269	0.999551	0.068721	0.0905827	0.10691	0.0364015	0.35869	0.414531	0.48329	0.39435
ENSMUSG00000026313	Hdac4	0.10729	0.999551	0.0134945	0.0159493	0.0142631	0.0177259	0.077049	0.0948983	0.100412	0.087251
ENSMUSG00000026260	Ndufa10	-0.108198	0.999551	0.165031	0.166435	0.167501	0.143304	6.01948	5.65269	5.79117	6.16358
ENSMUSG00000073616	Cops9	0.110029	0.999551	0.312022	0.626576	0.524288	0.499542	17.2932	14.3013	15.8335	16.8433
ENSMUSG00000026273	Mterf4	-0.768492	0.999551	0.199285	0.452387	0.174126	0.211697	2.17481	2.04765	2.04409	2.05424
ENSMUSG00000026274	Pask	0.457235	0.999551	0.038493	0.021462	0.0467943	0.036347	0.580743	0.668388	0.605402	0.572465
ENSMUSG00000026275	Ppp1r7	-0.0565813	0.999551	0.079646	0.0920615	0.0861602	0.0806521	2.25284	2.48913	2.30313	2.39725
ENSMUSG00000034088	Hdlbp	0.153889	0.999551	0.0701528	0.0701005	0.0870685	0.0706954	1.66134	1.65174	1.85978	1.66567
ENSMUSG00000026276	Septin2	-0.0603716	0.999551	0.207904	0.275452	0.24329	0.225088	7.0613	7.84699	6.80887	6.66192
ENSMUSG00000116048	Septin2	-0.0445215	0.999551	0.209774	0.27351	0.246039	0.227449	7.15688	7.94218	6.88909	6.75505
ENSMUSG00000026277	Stk25	0.359582	0.999551	0.0268763	0.0451334	0.0391387	0.0540455	1.35725	1.45658	1.28766	1.34438
ENSMUSG00000026278	Bok	0.168121	0.999551	0.218471	0.0789931	0.170796	0.16648	2.58141	2.44352	2.75283	2.80936
ENSMUSG00000026279	Thap4	-0.310821	0.999551	0.0263424	0.0321723	0.0268529	0.0208577	0.564167	0.467504	0.54569	0.581037
ENSMUSG00000026280	Atg4b	-0.496697	0.999551	0.0920957	0.0612277	0.0532133	0.0564547	1.63544	1.45314	1.45493	1.60089
ENSMUSG00000026283	Ing5	-0.125469	0.999551	0.374772	0.352087	0.324659	0.347829	2.43762	2.40006	2.71762	2.62031
ENSMUSG00000081051	Gm15427	-0.0684039	0.999551	67.724	80.2735	69.9765	72.4713	3111.26	3136.58	3101.62	3352.79
ENSMUSG00000067028	Cntnap5b	-0.498999	0.999551	0.00545787	0.00843169	0.00491119	0.00501257	0.321852	0.365547	0.281575	0.304145
ENSMUSG00000082431	Prdx2-ps1	-0.229979	0.999551	3.50328	6.32875	4.42145	4.05073	313.544	392.383	290.03	317.366
ENSMUSG00000101214	Gm28403	0.19598	0.999551	0.00808271	0.00996643	0.0124948	0.00843933	0.1887	0.182813	0.166507	0.176101
ENSMUSG00000056536	Pign	0.353212	0.999551	0.0119987	0.0157532	0.0195699	0.0162865	0.120387	0.108807	0.150269	0.136807
ENSMUSG00000026319	Relch	0.026707	0.999551	0.0718798	0.0710846	0.0828139	0.0644688	0.31678	0.337361	0.355711	0.321768
ENSMUSG00000101330	Gm10193	-0.588527	0.999551	9.55693	11.0577	7.25166	6.59987	100.348	144.901	107.017	105.37
ENSMUSG00000038866	Zcchc2	-0.160974	0.999551	0.0399112	0.0280278	0.0337101	0.0276888	0.188913	0.190102	0.238296	0.197433
ENSMUSG00000044340	Phlpp1	0.206289	0.999551	0.00861653	0.0114801	0.0120916	0.0113413	0.0592713	0.0605099	0.0670741	0.061432
ENSMUSG00000009905	Kdsr	-0.0389011	0.999551	0.0325476	0.0474299	0.0439506	0.0348075	0.344709	0.462103	0.465359	0.392254
ENSMUSG00000009907	Vps4b	0.0596712	0.999551	0.192124	0.216719	0.212944	0.217317	3.30524	3.63859	3.07448	3.21146
ENSMUSG00000097648	9330185C12Rik	0.339112	0.999551	0.0183671	0.016824	0.0307012	0.0144526	0.13975	0.08412	0.212815	0.16765
ENSMUSG00000026374	Tsn	0.0574366	0.999551	0.643913	0.793739	0.799042	0.712854	12.0186	12.8222	12.2699	12.5369
ENSMUSG00000064302	Clasp1	-0.23388	0.999551	0.0163672	0.0149921	0.0152089	0.0117546	0.0989826	0.102089	0.113953	0.10391
ENSMUSG00000026380	Tfcp2l1	-0.248196	0.999551	0.377669	0.499379	0.389423	0.356454	4.33406	4.49627	4.97379	4.42352
ENSMUSG00000048402	Gli2	0.220387	0.999551	0.016146	0.0201234	0.0238211	0.018922	0.107728	0.127529	0.146164	0.116885
ENSMUSG00000004451	Ralb	-0.544477	0.999551	0.0606395	0.0385728	0.0382662	0.030485	1.35428	1.18804	1.3349	1.51053
ENSMUSG00000026383	Epb41l5	-0.0168827	0.999551	0.0301757	0.0378776	0.0361313	0.0318572	0.198377	0.190412	0.201164	0.186592
ENSMUSG00000026384	Ptpn4	-0.180926	0.999551	0.049264	0.0658193	0.0537372	0.0488384	0.148733	0.190272	0.172178	0.164972
ENSMUSG00000036975	Tmem177	0.0120037	0.999551	0.207525	0.210099	0.24813	0.177907	2.69782	2.70127	2.68171	2.69825
ENSMUSG00000026385	Dbi	-0.0532207	0.999551	0.588484	0.552688	0.592295	0.519041	45.4772	38.62	43.3221	42.6287
ENSMUSG00000003721	Insig2	-0.276696	0.999551	0.0432063	0.0471146	0.0323586	0.0428212	0.93408	0.893293	0.844918	0.880627
ENSMUSG00000026339	Ccdc93	-0.244859	0.999551	0.0454525	0.0324602	0.0343293	0.0320676	0.308923	0.335187	0.306271	0.304643
ENSMUSG00000001674	Ddx18	-0.500357	0.999551	0.283195	0.338351	0.247443	0.196841	4.48187	4.376	4.61176	4.44192
ENSMUSG00000026341	Actr3	-0.31736	0.999551	0.119386	0.141665	0.0972013	0.114171	2.75672	3.04579	2.67067	2.62839
ENSMUSG00000036155	Mgat5	-0.0406478	0.999551	0.00820212	0.00694953	0.00877912	0.00612327	0.0344489	0.0326816	0.0417456	0.0358118
ENSMUSG00000026349	Ccnt2	-0.0334356	0.999551	0.185096	0.260596	0.229115	0.210918	1.08829	1.20408	1.25339	1.19107
ENSMUSG00000051590	Map3k19	0.0811078	0.999551	0.0274304	0.0251258	0.0340589	0.022209	0.0635229	0.0528963	0.0719021	0.0509502
ENSMUSG00000036104	Rab3gap1	-0.145053	0.999551	0.0239823	0.0403917	0.0236585	0.0350028	0.236729	0.267152	0.256863	0.228918
ENSMUSG00000036086	Zranb3	-0.168691	0.999551	0.0202937	0.0189461	0.0201186	0.0151855	0.597492	0.625937	0.63868	0.700298
ENSMUSG00000056211	R3hdm1	-0.348764	0.999551	0.0721685	0.081147	0.0645678	0.0570935	0.491351	0.553779	0.530513	0.436414
ENSMUSG00000026353	Ubxn4	-0.040191	0.999551	0.104988	0.0991724	0.0888669	0.111333	1.74871	1.90982	1.9307	1.83477
ENSMUSG00000026355	Mcm6	0.137748	0.999551	0.478012	0.473865	0.565926	0.492477	13.9865	13.9259	13.528	14.1039
ENSMUSG00000026356	Dars	-0.224775	0.999551	0.207865	0.229076	0.18446	0.192996	6.50011	6.75129	5.87908	6.15727
ENSMUSG00000089648	Gm15790	-0.533985	0.999551	1.34675	2.08436	1.2173	1.17666	16.1146	21.4817	12.9846	17.4818
ENSMUSG00000026409	Pfkfb2	0.698302	0.999551	0.0202971	0.0265597	0.0468701	0.0301742	0.42044	0.422299	0.473768	0.473605
ENSMUSG00000046404	Yod1	0.279726	0.999551	0.537008	0.582701	0.70021	0.672842	1.24751	1.38486	1.55201	1.73444
ENSMUSG00000042510	AA986860	-0.794761	0.999551	0.124029	0.143062	0.0722471	0.0831366	0.528271	0.593288	0.513757	0.611054
ENSMUSG00000016526	Dyrk3	0.263937	0.999551	1.38756	1.27587	1.72532	1.50673	6.69764	6.17893	8.01573	7.81859
ENSMUSG00000026427	Eif2d	-0.127933	0.999551	0.0640307	0.0509338	0.055947	0.0503178	2.86285	2.62078	2.64423	3.01144
ENSMUSG00000026425	Srgap2	0.250545	0.999551	0.0199171	0.0248379	0.0266281	0.0271432	0.168456	0.160017	0.179897	0.163294
ENSMUSG00000055184	Fam72a	-0.458532	0.999551	0.135897	0.133371	0.110259	0.0878386	0.606684	0.449016	0.623388	0.544599
ENSMUSG00000013275	Slc41a1	-0.214629	0.999551	0.0706732	0.0622456	0.0641259	0.0516539	0.415884	0.418291	0.434631	0.432909
ENSMUSG00000026434	Nucks1	-0.145047	0.999551	1.0746	1.21544	1.11019	0.982605	10.5545	11.2835	11.6865	10.8311
ENSMUSG00000100037	Gm29103	-0.283361	0.999551	0.0496037	0.0454361	0.0453114	0.033665	0.868064	0.898396	0.839247	0.702884
ENSMUSG00000026439	Rbbp5	-0.180246	0.999551	0.151939	0.159861	0.163255	0.115194	1.32844	1.20554	1.42086	1.31545
ENSMUSG00000054387	Mdm4	-0.0981669	0.999551	0.147941	0.172198	0.155689	0.146447	0.903179	1.02794	1.05411	0.987406
ENSMUSG00000046062	Ppp1r15b	-0.258497	0.999551	1.06228	1.13931	1.03979	0.821333	5.3652	5.37015	6.27985	5.53031
ENSMUSG00000102976	Zc3h11a	-0.228612	0.999551	0.313435	0.389638	0.343554	0.26337	2.67259	2.9351	2.9037	2.74386
ENSMUSG00000094410	Zbed6	-0.225737	0.999551	0.313092	0.390956	0.344716	0.264261	2.67462	2.94246	2.91353	2.75187
ENSMUSG00000020423	Btg2	0.312021	0.999551	0.926361	0.915875	1.01498	1.29067	7.1168	6.20909	7.36178	7.9702
ENSMUSG00000026456	Cyb5r1	-0.179863	0.999551	0.751809	1.21374	0.780064	0.96945	9.77352	11.8533	10.9045	11.2762
ENSMUSG00000026457	Adipor1	-0.255404	0.999551	0.297365	0.254617	0.259824	0.207665	7.502	6.28253	7.97263	7.62218
ENSMUSG00000026455	Klhl12	0.0410108	0.999551	0.0851272	0.115463	0.0758106	0.131843	1.39478	1.48603	1.44755	1.5436
ENSMUSG00000042207	Kdm5b	0.0372548	0.999551	0.24827	0.25079	0.269638	0.247757	2.83461	2.8182	3.20863	2.94229
ENSMUSG00000073557	Ppp1r12b	0.310022	0.999551	0.00606114	0.00846005	0.00958313	0.00861891	0.0251104	0.0304033	0.0385847	0.034998
ENSMUSG00000026429	Ube2t	-0.208474	0.999551	0.901646	1.24802	0.954133	0.924691	8.22001	8.9747	7.4755	8.17264
ENSMUSG00000079139	Gm4204	-0.155108	0.999551	3.96431	5.66301	4.28855	4.44145	228.797	265.945	229.726	246.842
ENSMUSG00000003051	Elf3	0.112314	0.999551	0.73289	0.788528	0.904642	0.757938	8.62018	7.78938	9.46317	9.04262
ENSMUSG00000041926	Rnpep	-0.244217	0.999551	0.0652368	0.0547761	0.0783761	0.0245971	2.15553	1.83998	2.08053	2.08092
ENSMUSG00000041879	Ipo9	-0.188078	0.999551	0.147085	0.167857	0.149584	0.129825	2.36421	2.30472	2.32382	2.1252
ENSMUSG00000009418	Nav1	0.087286	0.999551	0.0146657	0.016792	0.01802	0.0157594	0.130617	0.136015	0.145161	0.124831
ENSMUSG00000041801	Phlda3	0.210766	0.999551	1.82874	0.952157	1.93426	1.32387	14.1294	11.0027	18.9894	13.8483
ENSMUSG00000026413	Pkp1	0.0462851	0.999551	0.0230863	0.0300505	0.0403434	0.0153933	0.0814096	0.116863	0.11466	0.0879617
ENSMUSG00000087230	Mroh3	-0.235691	0.999551	0.0652199	0.0443786	0.055358	0.0387832	0.296285	0.274806	0.284931	0.236071
ENSMUSG00000041570	Camsap2	-0.324029	0.999551	0.0581095	0.0477681	0.043613	0.0417972	0.261493	0.252488	0.258423	0.233255
ENSMUSG00000041498	Kif14	0.380137	0.999551	0.0196123	0.0310296	0.0327148	0.0338811	0.249611	0.299681	0.29677	0.250075
ENSMUSG00000120728	ENSMUSG00000120728	-0.461596	0.999551	0.072169	0.121194	0.0683127	0.0734694	0.408958	0.459985	0.396739	0.416326
ENSMUSG00000041483	Zfp281	-0.148097	0.999551	3.52883	4.05851	3.49706	3.4177	16.0319	19.0843	18.3128	16.8437
ENSMUSG00000097113	Gm19705	-0.111117	0.999551	0.200051	0.220424	0.217861	0.17578	1.70768	1.7926	1.85942	1.70008
ENSMUSG00000097448	Platr22	0.0522171	0.999551	0.0873421	0.0622252	0.0576605	0.0983562	0.411478	0.456911	0.35953	0.395181
ENSMUSG00000026398	Nr5a2	0.0677068	0.999551	0.0832915	0.104283	0.105935	0.0927642	0.341052	0.374245	0.434504	0.401829
ENSMUSG00000026393	Nek7	-0.676872	0.999551	0.0173526	0.0158947	0.0118337	0.00919168	0.111311	0.114752	0.129061	0.129832
ENSMUSG00000056268	Dennd1b	0.0861083	0.999551	0.022373	0.0222217	0.0261432	0.021709	0.0975788	0.124935	0.129774	0.11074
ENSMUSG00000033964	Zbtb41	0.373409	0.999551	0.0794334	0.105675	0.11898	0.123222	0.283691	0.291039	0.351983	0.345707
ENSMUSG00000033952	Aspm	-0.146392	0.999551	0.113769	0.0852631	0.108443	0.0735358	0.854006	0.952782	0.988896	0.815579
ENSMUSG00000089991	Gm16332	-0.465543	0.999551	0.0553138	0.0528379	0.0448784	0.0343225	1.96048	2.21051	1.79514	1.98642
ENSMUSG00000104496	Gm5837	-0.484628	0.999551	2.7584	2.4489	2.1506	1.61286	103.334	116.925	94.8119	105.181
ENSMUSG00000101795	Gm5835	-0.15028	0.999551	26.0289	26.398	22.6629	25.0025	1216.49	1328.15	1071.59	1234.02
ENSMUSG00000026361	Cdc73	0.0480671	0.999551	0.0636247	0.119114	0.100944	0.0898967	0.610016	0.74536	0.673447	0.67271
ENSMUSG00000018196	Glrx2	0.285534	0.999551	0.0383369	0.0319236	0.0487229	0.037845	1.3627	1.1285	1.32161	1.323
ENSMUSG00000018199	Ro60	0.166816	0.999551	0.0641115	0.046575	0.0695391	0.0560143	0.769338	0.714826	0.712776	0.730186
ENSMUSG00000018189	Uchl5	-0.0139389	0.999551	0.177011	0.269644	0.247126	0.200222	5.76439	6.42916	5.26529	5.64279
ENSMUSG00000100441	Gm7266	0.28614	0.999551	5.16409	5.2558	5.13883	7.65855	345.564	253.724	315.474	360.471
ENSMUSG00000099875	Rbm3-ps	-0.138981	0.999551	10.12	11.7874	8.40569	11.6449	153.548	165.939	131.762	171.959
ENSMUSG00000006010	Odr4	-0.440666	0.999551	0.0475358	0.0703371	0.0447295	0.0430154	0.380286	0.472263	0.487232	0.459934
ENSMUSG00000006005	Tpr	-0.164292	0.999551	0.164832	0.164031	0.154691	0.141791	3.28137	3.62639	3.20138	3.24555
ENSMUSG00000100954	Gm10138	-0.0841783	0.999551	0.060883	0.0432485	0.0542824	0.0449742	0.218682	0.149094	0.230157	0.188891
ENSMUSG00000023150	Ivns1abp	-0.431314	0.999551	0.13107	0.170749	0.145062	0.0817063	3.46607	3.39631	3.6291	3.61089
ENSMUSG00000052748	Swt1	-0.330882	0.999551	0.152993	0.149773	0.122816	0.120273	1.03844	1.10534	0.935744	1.02102
ENSMUSG00000053286	Trmt1l	-0.355188	0.999551	0.098069	0.120372	0.0891156	0.0834185	0.745324	0.695281	0.598103	0.633626
ENSMUSG00000026484	Rnf2	0.0869744	0.999551	0.232644	0.255222	0.258819	0.264375	2.24799	2.1954	2.20173	2.19088
ENSMUSG00000100551	Gm19503	-0.314283	0.999551	7.47294	4.8578	6.10824	3.9265	281.561	305.158	277.188	272.455
ENSMUSG00000026483	Niban1	-0.553716	0.999551	0.017727	0.0197676	0.0111117	0.0146464	0.219661	0.22415	0.217857	0.197377
ENSMUSG00000043019	Edem3	-0.462278	0.999551	0.0226526	0.0231436	0.0121802	0.0212868	0.149856	0.195523	0.159103	0.164776
ENSMUSG00000014980	Tsen15	0.0102799	0.999551	0.0873953	0.106737	0.0986342	0.0988556	2.39973	2.01799	2.27813	2.28686
ENSMUSG00000026482	Rgl1	0.0586938	0.999551	0.00698292	0.00405095	0.00569459	0.00589762	0.041432	0.0424284	0.0414892	0.0360176
ENSMUSG00000042772	Smg7	0.144722	0.999551	0.0884909	0.107805	0.102061	0.116911	0.491125	0.499306	0.582214	0.573343
ENSMUSG00000042751	Nmnat2	-0.189515	0.999551	0.0261719	0.0298043	0.0213227	0.0281637	0.484535	0.505702	0.497221	0.509827
ENSMUSG00000099969	Gm28960	0.238432	0.999551	0.0706427	0.0716405	0.101404	0.068491	1.55414	1.61076	1.50122	1.6415
ENSMUSG00000026479	Lamc2	0.10237	0.999551	0.0510799	0.077702	0.0669468	0.0726352	0.623904	0.817124	0.794595	0.666924
ENSMUSG00000026478	Lamc1	-0.0112049	0.999551	0.0459197	0.0654293	0.070883	0.0410913	0.641345	0.736546	0.87467	0.661615
ENSMUSG00000073538	E330020D12Rik	0.256084	0.999551	0.537183	0.605166	0.782276	0.597847	6.03251	5.09018	5.68634	5.88907
ENSMUSG00000042699	Dhx9	0.0263917	0.999551	0.21306	0.296909	0.289584	0.235643	2.01041	2.19012	2.54739	2.1488
ENSMUSG00000026473	Glul	0.0503448	0.999551	0.190089	0.174119	0.181662	0.19889	3.43349	3.97208	3.58134	3.74128
ENSMUSG00000026470	Stx6	0.262997	0.999551	0.0164173	0.0236311	0.0317631	0.0169784	0.335382	0.317945	0.387306	0.363974
ENSMUSG00000026469	Xpr1	-0.573165	0.999551	0.0118885	0.0123917	0.00680571	0.00964511	0.101668	0.0961299	0.0820267	0.0953382
ENSMUSG00000033701	Acbd6	0.0585509	0.999551	0.0178809	0.0159792	0.0190531	0.0165752	0.215007	0.184959	0.219492	0.20206
ENSMUSG00000033671	Cep350	0.247707	0.999551	0.00996253	0.0194954	0.0126615	0.0225379	0.0932855	0.128172	0.115932	0.122114
ENSMUSG00000026466	Tor1aip1	-0.234962	0.999551	0.142133	0.155229	0.141703	0.113777	0.761688	0.827886	0.877287	0.722234
ENSMUSG00000050565	Tor1aip2	0.0114452	0.999551	0.33164	0.356262	0.386868	0.314244	3.21917	3.23817	3.23755	3.21314
ENSMUSG00000026601	Axdnd1	-0.245852	0.999551	0.0999492	0.110625	0.0894102	0.0899062	7.74904	9.90394	7.30357	7.47405
ENSMUSG00000026596	Abl2	0.337296	0.999551	0.045436	0.0650658	0.0810772	0.0602252	0.291815	0.32826	0.366805	0.336451
ENSMUSG00000060519	Tor3a	-0.307753	0.999551	0.137257	0.179607	0.137061	0.12167	0.840348	1.04429	0.898241	0.907453
ENSMUSG00000033557	Fam20b	-0.202035	0.999551	0.0415432	0.0328042	0.0275368	0.0375927	0.30083	0.359534	0.346714	0.350001
ENSMUSG00000026594	Ralgps2	0.529871	0.999551	0.0265903	0.0400701	0.0370985	0.0597663	0.298927	0.314668	0.295289	0.328326
ENSMUSG00000070565	Rasal2	-0.1104	0.999551	0.0167536	0.0258964	0.0221408	0.0178135	0.165023	0.194319	0.169807	0.161079
ENSMUSG00000049881	2810025M15Rik	-0.172446	0.999551	0.220814	0.242714	0.154349	0.25976	17.1793	14.8258	15.4414	17.1042
ENSMUSG00000040782	Cop1	-0.487946	0.999551	0.0367757	0.0401463	0.0303722	0.0250729	0.200503	0.214113	0.215687	0.208333
ENSMUSG00000058267	Mrps14	-0.11698	0.999551	2.24667	2.35627	2.3644	1.92722	63.3661	66.4652	57.9497	55.0503
ENSMUSG00000014226	Cacybp	-0.0503171	0.999551	1.92382	1.92929	1.76306	1.991	46.3873	47.2651	41.4488	46.4183
ENSMUSG00000026721	Rabgap1l	-0.253074	0.999551	0.00961456	0.0105681	0.00999248	0.00714338	0.0475668	0.0558072	0.0504045	0.0448751
ENSMUSG00000040423	Rc3h1	0.275311	0.999551	0.0449102	0.0481226	0.0577501	0.0559752	0.397413	0.409042	0.428684	0.389526
ENSMUSG00000053332	Gas5	-0.0364403	0.999551	20.5343	27.5944	22.8273	24.4823	102.545	94.7292	106.692	114.217
ENSMUSG00000064816	Gm22357	-0.0731633	0.999551	37.0975	64.7556	37.9183	59.5387	149.09	214.784	144.946	189.384
ENSMUSG00000084667	Gm23212	-0.136148	0.999551	40.6672	64.7449	40.6093	56.0762	104.573	164.967	120.982	144.571
ENSMUSG00000077220	Snord78	-0.374125	0.999551	66.8985	176.577	77.6806	110.719	133.797	283.813	180.742	207.896
ENSMUSG00000065160	Gm50452	0.159055	0.999551	31.1229	76.655	55.5961	65.7143	91.9854	160.912	129.321	127.673
ENSMUSG00000065735	Snord80	-0.295123	0.999551	10.7585	33.5058	16.9205	19.4709	46.6203	75.5522	67.6821	58.4127
ENSMUSG00002075950	Snord80	-0.370431	0.999551	11.3174	35.2463	15.8218	20.4824	49.0421	78.7859	69.2204	60.7644
ENSMUSG00000064968	Snord47	0.212296	0.999551	24.8983	40.7751	42.8507	34.1373	40.7427	72.5659	65.2649	60.7644
ENSMUSG00000065228	Gm25789	-0.0231848	0.999551	22.1682	37.1105	32.7279	26.2857	52.7451	60.217	70.1312	59.4887
ENSMUSG00000026709	Dars2	-0.34737	0.999551	0.0753791	0.0973726	0.0743067	0.062964	1.66801	1.66773	1.49796	1.55311
ENSMUSG00000026708	Cenpl	-0.234292	0.999551	0.333802	0.455312	0.28532	0.390707	1.8214	2.02066	1.62315	1.92398
ENSMUSG00000026705	Klhl20	-0.101335	0.999551	0.0363631	0.0382425	0.0423631	0.0280303	0.296292	0.308407	0.304779	0.260804
ENSMUSG00000102817	Gm6185	-0.146507	0.999551	0.0299284	0.0246725	0.0226634	0.0270824	0.0897853	0.0922936	0.0889102	0.102913
ENSMUSG00000026701	Prdx6	-0.143465	0.999551	1.62133	1.44679	1.31154	1.49082	39.6442	34.1672	34.9683	41.5157
ENSMUSG00000040297	Suco	-0.319353	0.999551	0.061387	0.0632581	0.0460943	0.0546814	0.299261	0.376913	0.363726	0.298578
ENSMUSG00000040225	Prrc2c	-0.110359	0.999551	0.210481	0.233947	0.207169	0.208533	2.71462	2.81804	2.87711	2.69512
ENSMUSG00000040124	Gorab	0.0649784	0.999551	0.179596	0.130471	0.167744	0.159715	0.681224	0.521883	0.60875	0.703306
ENSMUSG00000026585	Kifap3	-0.197077	0.999551	0.0143627	0.0208949	0.0173478	0.0137614	0.30373	0.391199	0.332931	0.325688
ENSMUSG00000026584	Scyl3	-0.512057	0.999551	0.0669644	0.104275	0.05656	0.0646362	1.19866	1.2145	1.20726	1.03216
ENSMUSG00000041406	BC055324	-0.155827	0.999551	0.0833277	0.0926825	0.084249	0.0754036	1.23325	1.3488	1.27518	1.24308
ENSMUSG00000041396	Mettl18	-0.435423	0.999551	2.46692	2.19187	1.50884	1.96445	8.85626	8.51892	7.5873	8.59448
ENSMUSG00000026579	F5	-0.521916	0.999551	0.0373499	0.037322	0.0318929	0.0207397	0.097619	0.111966	0.104579	0.0860315
ENSMUSG00000040918	Slc19a2	0.0824568	0.999551	0.330657	0.260539	0.37279	0.260605	1.73506	1.89216	2.22742	1.81137
ENSMUSG00000026575	Nme7	-0.308421	0.999551	0.0400048	0.0545672	0.0353342	0.0417093	0.965767	1.06625	1.08852	1.00024
ENSMUSG00000026576	Atp1b1	0.126068	0.999551	0.347258	0.42578	0.48738	0.366196	4.96552	5.85323	6.13287	5.33706
ENSMUSG00000040848	Sft2d2	0.144738	0.999551	0.0606913	0.0502977	0.0530292	0.0706113	0.91615	1.06949	0.946951	0.931023
ENSMUSG00000026571	Dcaf6	-0.149408	0.999551	0.0149893	0.0193835	0.0165638	0.0147608	0.108893	0.12357	0.119414	0.113698
ENSMUSG00000026566	Mpzl1	0.0955454	0.999551	0.0672996	0.0767421	0.0924051	0.0633855	0.998507	1.24423	1.16406	1.09744
ENSMUSG00000026565	Pou2f1	-0.0614099	0.999551	0.0544948	0.0708115	0.061272	0.0600161	0.204461	0.227138	0.258745	0.241593
ENSMUSG00000026564	Dusp27	0.0513765	0.999551	0.0487792	0.0625533	0.05285	0.0635624	0.353162	0.418214	0.537025	0.462593
ENSMUSG00000040612	Ildr2	-0.195601	0.999551	0.117703	0.15026	0.135235	0.101478	4.22989	4.74296	4.54534	3.56095
ENSMUSG00000026558	Uck2	-0.102713	0.999551	0.147013	0.122729	0.132518	0.121245	1.80881	1.59377	1.8959	1.78247
ENSMUSG00000052428	Tmco1	-0.0714225	0.999551	0.363086	0.415726	0.408456	0.340879	3.12254	3.38401	3.3886	3.23425
ENSMUSG00000026687	Aldh9a1	0.171269	0.999551	0.112796	0.114799	0.134145	0.124751	5.68678	6.27663	5.70527	5.85198
[truncated: 7,387 more rows]

## Sheet: SLAM_mESC_Gabpa_2h
Table S3. Differentially expressed genes of SLAM-seq in mESCs with GABPA degradation for 2 hours (dTAG vs DMSO).
[truncated: 12,837 more rows]

[truncated: 1 more sheets: SLAM_mESC_Gabpa_4h]
