# Supplementary material for: GABPA Recruits the Integrator Endonuclease Complex to Promote Transcription Elongation
Source: Research Square preprint supplement (doi:10.21203/rs.3.rs-7297262/v1), 2025-09-19
Supplement: Supplementary file 3 [file 7d56505bd3a21af8385faf3d.xlsx]

## Sheet: List of the oligos
Table S4. List of the oligos
This table contains the detailed sequences of oligos used in this study.
Primers for Gabpa-FKBP-HA,Gabpb1-FKBP-HA,Gabpb2-FKBP-Flag mammalian expression plasmids
Easy Fusion Vector F	TGAGTCGTATTACGCGCGC
Easy Fusion Vector R	AATTCGATATCAAGCTTATCG
Gabpb1 HAL Forward	GATAAGCTTGATATCGAATTGGGTTCTTAATAACTGAGAATTTAA
Gabpb1 HAL Reverse	CACCACCTCCAACGGCTTCTTTGTTGGTCTGGA
Gabpb1 HAR Forward	CGCCCTATAGCTGCCATGAACACCAGTTT
Gabpb1 HAR Reverse	AGCGCGCGTAATACGACTCACAATTGTCAGAAAAGCATATATTTT
Gabpb1 check Forward	ATGTTCTTTTGATGGACACAT
Gabpb1 check Reverse	ATCAACTCATTTATAACAGTAAAAAAAGA
Gabpb1 FKBP Forward	AGAAGCCGTTGGAGGTGGTGGATCAGGAGG
Gabpb1 FKBP Reverse	TTCATGGCAGCTATAGGGCGAATTGGAGCTCC
Gabpb2 HAL Forward	aaagagagatcatagaaaacatgt
Gabpb2 HAL Reverse	ggatgaaatagtttctatggaaac
Gabpb2 HAR Forward	caccaacggctacaacttgt
Gabpb2 HAR Reverse	aggttctctggaagagcaag
Flag sequence	gactataaggaccacgacggagactacaaggatcatgatattgattacaaagacgatgacgataag
FKBP-Gabpb2 Forward	AAGATCTCGAGGAGTGCAGGTGGAAACCATCTCCC
FKBP-Gabpb2 Reverse	CCTTATAGTCGCTGCCGCTGCCGCTGCCTTCCAGTTTTAGAAGC
Flag-Forward	CAGCGGCAGCGACTATAAGGACCACGACGGA
Flag Reverse	GCCGTTGGTGTTACTTATCGTCATCGTCTTTGTAA
Gabpb2 check Forward	aggcagtgaaagagagct
Gabpb2 check Reverse	attgttaccctcttaaggacat
sgRNA Name	Sequence
Gabpa sgRNA	GACAAAGAGATTTGAGACCT
Gabpb1 sgRNA	GACAAAAGGTAAAAGCAAAC
Gabpb2 sgRNA	TGAGCACAAGTTGTAGCCGT
