# Supplementary material for: GABPA Recruits the Integrator Endonuclease Complex to Promote Transcription Elongation
Source: Research Square preprint supplement (doi:10.21203/rs.3.rs-7297262/v1), 2025-09-19
Supplement: Supplementary file 4 [file 852eb3607eafdcbc1068b64a.xlsx]

## Sheet: GABPA_12h_RNA
Table S1. Differentially expressed genes in mESCs with GABPA degradation for 12 hours (dTAG vs DMSO).
Gene_id	Gene_name	log2FoldChange	padj	DMSO_Rep1	DMSO_Rep2	dTAG_Rep1	dTAG_Rep2
ENSMUSG00000113149	Gm49383	-6.9016	6.93247e-18	16.42	13.27	0.26	0.06
ENSMUSG00000067147	Rpl7a-ps11	-6.70447	0.287575	32.61	0	0.36	0
ENSMUSG00000034152	Exoc3	-5.89738	7.26122e-86	10.86	10.97	0.16	0.21
ENSMUSG00000058706	0610030E20Rik	-5.43233	6.53563e-53	6.93	6.26	0.2	0.12
ENSMUSG00000017664	Slc35c2	-5.42882	3.28499e-49	14.7	15.37	0.34	0.39
ENSMUSG00000001285	Myg1	-5.22693	1.21735e-79	35.35	33.75	0.9	0.98
ENSMUSG00000024911	Fibp	-5.17117	6.20024e-54	29.21	28.96	0.91	0.74
ENSMUSG00000110234	Gm45799	-5.15342	9.24442e-14	27.87	36.84	1.6	0.24
ENSMUSG00000028322	Exosc3	-5.14663	1.00076e-86	56.41	55.14	1.68	1.53
ENSMUSG00000089872	Rps6kc1	-5.11436	1.96945e-42	6.39	5.38	0.19	0.16
ENSMUSG00000028670	Lypla2	-5.10268	2.52119e-171	72.05	70.17	1.9	2.33
ENSMUSG00000024896	Minpp1	-5.08243	3.42303e-89	20.19	20.21	0.49	0.72
ENSMUSG00000003382	Etv3	-4.96437	5.57735e-49	5.37	5.04	0.2	0.13
ENSMUSG00000073775	Kti12	-4.79771	5.01376e-74	26.83	28.95	1.09	0.95
ENSMUSG00000025737	Wdr24	-4.73826	2.8314e-83	15.46	15.12	0.67	0.5
ENSMUSG00000019761	Krt10	-4.72346	1.39088e-06	4.19	2.76	0.03	0.09
ENSMUSG00000079478	Znrd2	-4.61712	9.93536e-88	109.04	100.55	5.13	3.69
ENSMUSG00000031066	Usp11	-4.52154	3.7602e-85	13.92	13.68	0.56	0.66
ENSMUSG00000041231	Ublcp1	-4.51847	3.1726e-76	22.89	20.62	0.98	0.95
ENSMUSG00000035378	Shq1	-4.4982	1.62799e-114	34.47	33.36	1.68	1.22
ENSMUSG00000024382	Ercc3	-4.31755	1.59598e-142	32.98	32.99	1.84	1.53
ENSMUSG00000036948	Trappc14	-4.29236	7.45631e-45	11.34	12.6	0.83	0.35
ENSMUSG00000030037	Mrpl53	-4.28192	3.96856e-88	107.96	103.34	5.27	5.83
ENSMUSG00000027618	Nfs1	-4.19439	2.0403e-72	27.64	24.29	1	2.04
ENSMUSG00000030036	Mogs	-4.17514	5.47857e-135	29.82	32.14	1.81	1.68
ENSMUSG00000030768	Disp1	-4.16886	7.62058e-25	2.66	2.64	0.2	0.11
ENSMUSG00000029513	Prkab1	-4.13274	7.02103e-128	41.98	39.99	2.58	2.19
ENSMUSG00000116138	C030006K11Rik	-4.10673	4.5533e-20	5.97	7.3	0.35	0.44
ENSMUSG00000020491	2810021J22Rik	-4.09182	5.95357e-19	2.76	2.48	0.21	0.11
ENSMUSG00000028187	Rpf1	-4.0756	3.16997e-102	50.33	41.46	2.42	3.09
ENSMUSG00000045854	Lyrm2	-4.0586	6.06124e-10	22.84	20.5	1.34	1.29
ENSMUSG00000033285	Wdr3	-4.00444	7.46241e-176	35.25	35.89	2.48	2.04
ENSMUSG00000034290	Nek9	-3.98965	4.05319e-100	11.53	11.06	0.82	0.63
ENSMUSG00000047084	Ngrn	-3.94564	1.42347e-60	30.87	30.59	1.74	2.31
ENSMUSG00000002763	Pex6	-3.87617	9.41984e-45	7.58	8.9	0.55	0.59
ENSMUSG00000004789	Dlst	-3.85773	6.32667e-180	54.75	51.92	4.24	3.26
ENSMUSG00000041375	Ccdc9	-3.83244	1.72107e-120	38.53	38.76	3.09	2.33
ENSMUSG00000030127	Cops7a	-3.81493	1.43877e-296	192.69	199.04	15.14	13.4
ENSMUSG00000024414	Mrpl27	-3.77917	2.36459e-50	56.36	55.32	4.92	3.37
ENSMUSG00000030545	Pex11a	-3.70325	4.77746e-14	4.08	3.17	0.29	0.27
ENSMUSG00000027865	Gdap2	-3.68176	2.05921e-20	4.25	4.15	0.44	0.26
ENSMUSG00000028729	Ebna1bp2	-3.64792	3.3778e-215	59.56	57.27	4.71	4.78
ENSMUSG00000034786	Gpsm3	-3.62623	2.40917e-16	7.49	8.89	0.9	0.45
ENSMUSG00000067365	Tmem128	-3.62151	8.24653e-28	17.44	19.71	1.87	1.1
ENSMUSG00000074797	Itpa	-3.58632	3.79936e-161	98.28	94.24	8.18	8.17
ENSMUSG00000018733	Pex12	-3.54861	2.3911e-21	5.06	5.11	0.44	0.45
ENSMUSG00000034274	Thoc5	-3.52552	6.48355e-126	43.97	40.77	3.83	3.66
ENSMUSG00000120893	ENSMUSG00000120893	-3.48326	0.0656013	3.89	4.39	0	0.75
ENSMUSG00000037816	Fbxw17	-3.47427	2.94225e-13	4.07	5.04	0.41	0.42
ENSMUSG00000029389	Ddx55	-3.46858	2.32675e-36	8.98	8.12	0.96	0.62
ENSMUSG00000022559	Fbxl6	-3.46608	4.02163e-70	29.08	32.76	2.54	3.15
ENSMUSG00000021932	Rnaseh2b	-3.46178	3.63691e-48	22.85	22.29	2.28	1.89
ENSMUSG00000014873	Surf2	-3.43605	1.31273e-56	34.94	35.53	3.53	3.11
ENSMUSG00000091811	Inafm1	-3.42814	0.00460775	5.54	3.97	0.13	0.77
ENSMUSG00000037049	Smpd1	-3.42738	6.04944e-13	3.23	3.09	0.27	0.33
ENSMUSG00000081476	Itpa-ps1	-3.42066	1.46292e-14	23.16	25.15	3.19	1.43
ENSMUSG00000031021	Tmem9b	-3.39078	6.8155e-11	4.42	3.57	0.35	0.41
ENSMUSG00000031617	Tmem184c	-3.38448	2.19053e-56	13.54	14.51	1.41	1.33
ENSMUSG00000009640	Dmap1	-3.36753	2.18766e-55	27.65	25.4	2.95	2.29
ENSMUSG00000050846	Zfp623	-3.36626	1.53424e-29	8.15	7.17	0.8	0.71
ENSMUSG00000026577	Blzf1	-3.32796	5.35204e-35	12.76	9.75	1.11	1.11
ENSMUSG00000022560	Slc52a2	-3.31539	8.39057e-41	4.78	4.81	0.46	0.52
ENSMUSG00000031917	Nip7	-3.31065	6.38948e-259	192.69	191.51	13.29	16.88
ENSMUSG00000057649	Brd9	-3.30188	1.24647e-60	18.57	18.92	1.61	2.25
ENSMUSG00000022313	Utp23	-3.3015	1.89263e-31	8.7	7.17	0.85	0.65
ENSMUSG00000026171	Rnf25	-3.2918	1.12307e-52	27.15	26.54	2.53	3.07
ENSMUSG00000020973	Dnaaf2	-3.2825	3.06064e-21	4.24	3.66	0.38	0.47
ENSMUSG00000033253	Szt2	-3.28042	5.1764e-74	4.52	5.39	0.54	0.5
ENSMUSG00000051735	Rinl	-3.24268	2.34295e-75	19.9	19.13	1.88	2.31
ENSMUSG00000021597	Slf1	-3.23703	1.08492e-15	2.92	2.43	0.22	0.36
ENSMUSG00000006392	Med8	-3.21835	1.16267e-71	55.61	51.5	6.24	5.46
ENSMUSG00000075054	Yae1d1	-3.20778	9.20936e-39	8.43	8.24	1.04	0.7
ENSMUSG00000053740	Gm6457	-3.20607	0.0401159	2.87	3.52	0.24	0.46
ENSMUSG00000038812	Trmt112	-3.19889	1.45628e-122	130.1	130.79	13.92	14.5
ENSMUSG00000027366	Sppl2a	-3.17305	7.35458e-27	3.16	2.88	0.36	0.33
ENSMUSG00000054676	1600014C10Rik	-3.14745	6.62429e-13	5.02	3.16	0.73	0.79
ENSMUSG00000039233	Tbce	-3.14482	1.80995e-33	14.36	12.38	1.46	1.63
ENSMUSG00000113786	Gm49384	-3.13972	0.000322708	2.16	4.19	0.46	0.33
ENSMUSG00000057895	Zfp105	-3.13059	1.19579e-15	5.49	5.84	0.89	0.44
ENSMUSG00000027099	Mtx2	-3.12621	1.71378e-54	15.43	13	1.59	1.72
ENSMUSG00000042472	Zfp410	-3.12266	5.19952e-44	13.68	11.89	1.65	1.33
ENSMUSG00000040592	Cd79b	-3.11259	0.000118293	2.43	2.59	0.38	0.17
ENSMUSG00000073471	Rsph3a	-3.11117	1.27316e-06	2.34	1.57	0.16	0.34
ENSMUSG00000022973	Synj1	-3.10355	5.30709e-27	2.46	2.48	0.26	0.33
ENSMUSG00000031916	Cog8	-3.09628	4.79508e-113	30.11	29.09	2.75	2.93
ENSMUSG00000007867	Ift43	-3.06376	1.50808e-11	12.77	12.47	1.41	1.65
ENSMUSG00000049957	Ccdc137	-3.04464	5.7919e-28	8.67	8.74	1.45	0.71
ENSMUSG00000021621	Zcchc9	-3.0432	9.0453e-22	11.32	11.73	1.84	1.02
ENSMUSG00000109602	Gm31597	-3.03428	0.00126002	6.88	6.28	0.42	1.21
ENSMUSG00000025218	Poll	-3.02359	4.23411e-36	11.66	12.76	1.26	1.79
ENSMUSG00000043251	Exoc3l	-3.02232	1.1596e-64	20.41	20.4	2.76	2.36
ENSMUSG00000040351	Ankib1	-3.02064	2.1166e-23	2.3	2.49	0.33	0.27
ENSMUSG00000027406	Idh3b	-3.00923	9.9824e-157	109.43	105.29	13.44	13.52
ENSMUSG00000027331	Knstrn	-3.00917	4.96802e-99	32.71	32.91	3.78	4.87
ENSMUSG00000021891	Mettl6	-3.00121	1.6107e-48	10.77	10.72	2.01	1.4
ENSMUSG00000020660	Pomc	-2.9936	0.000584304	2.82	2.57	0.32	0.38
ENSMUSG00000027804	Ppid	-2.99291	4.30775e-160	114.9	103.52	13.7	14.21
ENSMUSG00000005779	Psmb4	-2.97476	6.65601e-265	425.99	426.2	57.52	52.81
ENSMUSG00000041420	Meis3	-2.93976	2.26315e-06	2.53	2.19	0.34	0.28
ENSMUSG00000019969	Psen1	-2.93863	9.10516e-68	20.12	19.97	2.69	2.64
ENSMUSG00000030742	Lat	-2.93025	4.72325e-05	2.48	3.47	0.24	0.56
ENSMUSG00000022422	Dscc1	-2.91902	5.80337e-14	8.58	7.61	1.17	0.99
ENSMUSG00000034259	Exosc4	-2.90794	2.06393e-66	31.17	33.8	4.54	4.28
ENSMUSG00000013701	Timm23	-2.89376	1.48236e-188	238.3	226.89	30.66	33.2
ENSMUSG00000030881	Arfip2	-2.87562	2.18933e-71	21.66	20.56	3.31	3.14
ENSMUSG00000054312	Mrps21	-2.87428	3.94124e-46	175.58	157.08	19.57	22.49
ENSMUSG00000029617	Ccz1	-2.85849	4.55308e-67	34.38	32.74	4.85	4.57
ENSMUSG00000027341	Tmem230	-2.8497	4.72051e-18	9.08	10.07	0.82	1.39
ENSMUSG00000024477	Pggt1b	-2.84884	2.19074e-37	7.54	6.93	0.59	1.38
ENSMUSG00000000600	Krit1	-2.84836	4.43024e-47	13.47	12.51	1.86	1.94
ENSMUSG00000074064	Mlycd	-2.84269	7.83839e-06	1.91	1.69	0.28	0.23
ENSMUSG00000020263	Appl2	-2.83843	2.95324e-17	4.9	4.89	0.44	0.95
ENSMUSG00000031711	Zfp330	-2.83285	1.0877e-60	38.37	32.48	4.96	5.15
ENSMUSG00000032308	Ulk3	-2.8276	3.69526e-11	2.53	3.1	0.45	0.36
ENSMUSG00000029649	Pomp	-2.82591	1.84105e-131	291.11	265.54	35.08	35.13
ENSMUSG00000021254	Gpatch2l	-2.81493	2.12927e-24	4.3	4.57	0.78	0.54
ENSMUSG00000014859	E2f4	-2.80848	2.43173e-224	185.89	196.89	28.34	27.3
ENSMUSG00000022814	Umps	-2.79899	6.20635e-151	55.14	50.44	7.96	7.5
ENSMUSG00000067847	Romo1	-2.79572	4.36763e-33	86.56	77.72	10.37	12.15
ENSMUSG00000046550	Spin2c	-2.79512	0.000723368	2.2	1.81	0.38	0.21
ENSMUSG00000020978	Klhdc2	-2.782	3.99011e-43	19.15	18.98	2.73	2.91
ENSMUSG00000054226	Tprkb	-2.7787	7.53975e-39	21.06	23.19	2.34	4.35
ENSMUSG00000038510	Rpf2	-2.77794	1.54846e-52	46.17	39.42	5.18	6.69
ENSMUSG00000047098	Rnf31	-2.75568	6.76969e-62	15.56	18.35	2.64	2.48
ENSMUSG00000084957	Bbip1	-2.74785	2.49965e-12	15.4	15.14	1.48	2.64
ENSMUSG00000028468	Rgp1	-2.74723	1.6107e-48	6.74	6.8	1.19	0.98
ENSMUSG00000041079	Rwdd2b	-2.74289	2.23613e-19	7.56	7.6	1.19	1.12
ENSMUSG00000035203	Epn1	-2.74148	4.31818e-95	50.46	53.37	9.15	7.08
ENSMUSG00000027890	Gstm4	-2.73338	3.88076e-12	6.24	7.61	0.77	1.05
ENSMUSG00000028292	Rars2	-2.72881	3.00428e-50	24.3	23.78	3.87	3.52
ENSMUSG00000004096	Cwc15	-2.72614	4.57719e-69	79.32	69.13	11.04	11.42
ENSMUSG00000026333	Gin1	-2.71947	1.29737e-08	2.97	4.14	0.66	0.77
ENSMUSG00000019303	Psmc3ip	-2.71924	2.3028e-34	24.2	24.49	3.67	3.92
ENSMUSG00000001569	Nom1	-2.719	3.91247e-73	7.22	6.65	1.07	1.08
ENSMUSG00000056820	Tsnax	-2.70712	8.75865e-63	30.03	26.63	4.97	3.91
ENSMUSG00000025208	Mrpl43	-2.70399	1.91289e-67	50.76	54.32	8.97	7.51
ENSMUSG00000091803	Cox16	-2.70289	6.51656e-18	40.06	37.3	4.35	6.66
ENSMUSG00000039841	Zfp800	-2.69964	6.41285e-09	2.27	1.9	0.36	0.24
ENSMUSG00000025733	Rhot2	-2.69319	1.32751e-111	36.43	37.48	5.6	6.03
ENSMUSG00000014402	Tsg101	-2.69168	2.74403e-45	23.64	20.96	3.17	3.86
ENSMUSG00000073684	Faap20	-2.68899	3.65828e-38	33.93	38.8	5.37	5.66
ENSMUSG00000031156	Slc35a2	-2.67953	1.97474e-19	8.6	9.17	0.91	1.25
ENSMUSG00000021550	2210016F16Rik	-2.67258	7.3929e-27	7.66	7.22	1.37	1.01
ENSMUSG00000018661	Cog1	-2.66755	9.01546e-46	10.82	10.86	2.01	1.48
ENSMUSG00000026377	Nifk	-2.66551	3.94556e-89	63.82	56.49	8.67	10.41
ENSMUSG00000035683	Melk	-2.65464	5.41142e-86	30.44	28.35	4.65	4.85
ENSMUSG00000030615	Tmem126a	-2.65069	2.79691e-26	42.44	36.74	5.27	7.51
ENSMUSG00000031897	Psmb10	-2.64754	4.32663e-29	19.89	23.53	3.55	3.51
ENSMUSG00000062906	Hdac10	-2.6404	1.46543e-13	4.39	4.41	0.75	0.72
ENSMUSG00000036721	Zscan12	-2.63862	3.79191e-19	5.32	5.16	0.79	0.92
ENSMUSG00000025470	Zfp511	-2.63547	6.41639e-23	20.69	20.16	3.37	3.32
ENSMUSG00000038880	Mrps34	-2.62968	2.00279e-88	123.36	123.48	19.42	21.13
ENSMUSG00000021576	Pdcd6	-2.62778	3.51177e-61	60.97	56.48	9.29	10.09
ENSMUSG00000044991	Shld1	-2.61548	1.41611e-07	5.98	6.25	1.19	0.86
ENSMUSG00000073982	Rhog	-2.61079	8.01197e-12	9.33	9.36	2.1	1.02
ENSMUSG00000027953	Slc50a1	-2.60579	3.908e-17	21.22	19.2	4.49	2.27
ENSMUSG00000037570	Mcrs1	-2.6046	1.31456e-100	65.77	73.67	11.28	12.29
ENSMUSG00000034893	Cog3	-2.58913	1.52713e-47	10.76	9.71	1.83	1.63
ENSMUSG00000008226	Scrn3	-2.58207	3.78893e-28	11.24	10.56	1.94	1.8
ENSMUSG00000035078	Mtmr9	-2.58195	2.35678e-46	19.75	19.46	3.9	2.78
ENSMUSG00000060601	Nr1h2	-2.57245	2.00606e-84	53.28	55.71	10.65	8.86
ENSMUSG00000030264	Thumpd3	-2.56796	5.80988e-79	40.34	38.31	6.49	7
ENSMUSG00000026499	Acbd3	-2.56589	2.69062e-45	11.94	11.42	1.96	2.05
ENSMUSG00000024325	Ring1	-2.56407	2.25018e-25	12.35	14.12	2.8	1.78
ENSMUSG00000032215	Rsl24d1	-2.56269	1.79251e-106	120.16	105.58	21.25	19.41
ENSMUSG00000030727	Rabep2	-2.56242	2.14699e-36	14.55	15.17	2.42	2.62
ENSMUSG00000025272	Tro	-2.55081	1.47938e-25	3.45	3.58	0.51	0.58
ENSMUSG00000113047	Gm47469	-2.54889	1.82829e-19	5	5.62	0.82	0.79
ENSMUSG00000085028	Slc2a4rg-ps	-2.52686	3.7164e-06	2.12	1.99	0.46	0.33
ENSMUSG00000033712	Ccar2	-2.52415	1.59288e-85	24.83	23.86	4.41	4.21
ENSMUSG00000047656	Trpt1	-2.52189	0.00831251	1.4	2.3	0.27	0.39
ENSMUSG00000107761	2010008C14Rik	-2.51501	0.0393641	3.85	2.6	0.17	0.97
ENSMUSG00000031534	Smim19	-2.51363	2.4155e-06	3.5	4.67	0.5	0.95
ENSMUSG00000055900	Tmem69	-2.51021	1.31752e-15	8.97	9.94	1.31	1.2
ENSMUSG00000017288	Vps53	-2.50907	5.14295e-43	18.06	17.27	3.3	3.82
ENSMUSG00000062822	4833420G17Rik	-2.50165	3.86032e-47	16.4	16.81	3.17	2.88
ENSMUSG00000020133	2310011J03Rik	-2.49253	2.33199e-41	24.74	26.83	4.56	4.77
ENSMUSG00000038733	Wdr26	-2.48824	1.33408e-65	11.58	11.19	1.78	2.35
ENSMUSG00000002319	Ipo4	-2.48588	2.44323e-125	41.62	43.77	7.81	7.73
ENSMUSG00000032078	Zpr1	-2.48568	8.7372e-94	37.41	36.94	7.11	6.42
ENSMUSG00000024299	Adamts10	-2.4816	5.27936e-23	6.07	6.79	1.23	1.16
ENSMUSG00000020083	Fam241b	-2.47602	2.94388e-09	6.05	5.77	1.17	1.14
ENSMUSG00000075040	Zfp408	-2.47381	1.08013e-36	9.31	9.12	1.71	1.65
ENSMUSG00000051146	Camk2n2	-2.47147	0.000868087	2.4	2.65	0.72	0.21
ENSMUSG00000109941	Exosc6	-2.47146	0.590847	16	18.45	6.3	0
ENSMUSG00000089847	Timm10b	-2.4506	4.70996e-28	55.47	54.31	8.11	10.14
ENSMUSG00000043155	Hpdl	-2.44969	8.92164e-15	7.46	7.49	1.27	1.51
ENSMUSG00000064023	Klk8	-2.44799	2.26712e-17	13.59	12.43	2.32	2.5
ENSMUSG00000110834	Gm39469	-2.44318	0.0573342	2.36	2.04	0.42	0.4
ENSMUSG00000118664	Tusc3	-2.4393	8.64154e-32	11.17	10.83	2.22	1.94
ENSMUSG00000028848	Gpn2	-2.43879	1.00351e-57	53.06	54.38	10.91	9.22
ENSMUSG00000002064	Sdf2	-2.43348	8.60516e-63	65.37	60.05	11.24	12.42
ENSMUSG00000029613	Eif2ak1	-2.43022	1.55002e-78	20.65	19.58	3.9	3.72
ENSMUSG00000027305	Ndufaf1	-2.43008	1.29634e-24	20.45	17.79	3.16	4.13
ENSMUSG00000026927	Entr1	-2.42139	1.01514e-58	36.1	32.37	6.82	6.28
ENSMUSG00000019143	Hars2	-2.41511	2.05807e-33	11.84	12.79	2.07	1.81
ENSMUSG00000030271	Ogg1	-2.41314	1.39506e-41	30.42	29.84	5.22	6.28
ENSMUSG00000047866	Lonp2	-2.41228	2.5609e-58	26.14	24.67	5.51	4.76
ENSMUSG00000039929	Urb1	-2.40692	7.8182e-63	10.42	11.42	2.35	1.85
ENSMUSG00000056592	Zfp658	-2.39218	8.17465e-08	1.98	2.16	0.57	0.25
ENSMUSG00000032002	Dcun1d5	-2.39033	8.35828e-53	36.63	34.91	6.58	7.29
ENSMUSG00000035104	Eva1a	-2.3869	0.000618676	1.87	1.57	0.38	0.29
ENSMUSG00000040648	Ppip5k2	-2.38136	1.43872e-66	14.42	13.91	2.86	2.83
ENSMUSG00000070610	Gm13127	-2.37593	8.94285e-05	2.72	3.34	0.46	0.75
ENSMUSG00000033852	Gm28042	-2.36646	4.87231e-18	3.74	3.51	0.77	0.66
ENSMUSG00000033970	Rfc3	-2.36576	9.97809e-45	40.42	38.78	8.04	7.6
ENSMUSG00000005609	Ctr9	-2.36119	1.27179e-70	18.61	18.14	3.75	3.53
ENSMUSG00000049097	Ankrd34a	-2.35799	2.51542e-07	2.68	2.18	0.45	0.52
ENSMUSG00000021911	Parg	-2.35707	9.18054e-73	21.44	20.37	3.89	4.18
ENSMUSG00000045268	Zfp691	-2.34652	2.47256e-08	4.91	4.57	1.01	0.81
ENSMUSG00000058388	Phtf1	-2.34454	8.43159e-24	8.73	7.1	1.43	1.7
ENSMUSG00000028467	Gba2	-2.33671	1.46987e-30	8.23	9.31	1.85	1.69
ENSMUSG00000032769	Trpa1	-2.3344	4.88885e-14	2.83	3.42	0.78	0.58
ENSMUSG00000028797	Tmem234	-2.33371	2.61422e-67	65.73	63.03	11.87	13.52
ENSMUSG00000027963	Extl2	-2.33311	7.20984e-08	2.33	2.33	0.38	0.55
ENSMUSG00000039648	Kyat1	-2.32806	1.3675e-06	3.06	3	0.68	0.57
ENSMUSG00000028018	Gstcd	-2.32772	1.79189e-32	9.16	9.87	1.78	2.19
ENSMUSG00000001767	Crnkl1	-2.32586	2.01273e-61	22.5	21.47	4.09	4.83
ENSMUSG00000062995	Ica1	-2.3253	0.00032113	2.62	1.78	0.22	0.83
ENSMUSG00000113204	Gm46430	-2.32223	2.03837e-30	12.73	11.91	2.22	2.72
ENSMUSG00000079179	Rab10os	-2.32116	6.99415e-20	5.9	6.53	1.14	1.33
ENSMUSG00000019917	Septin10	-2.3204	6.54184e-19	7.4	7.68	1.37	1.56
ENSMUSG00000062101	Zfp119b	-2.31594	5.89782e-05	1.94	2.61	0.53	0.4
ENSMUSG00000029465	Arpc3	-2.31538	1.07803e-78	138.51	137.26	27.22	29.11
ENSMUSG00000074405	Zfp865	-2.3122	1.58167e-26	6.81	7.15	1.39	0.78
ENSMUSG00000048330	Ric3	-2.30498	3.29041e-15	3.2	3.06	0.51	0.74
ENSMUSG00000062937	Mtap	-2.29455	1.04195e-70	32.91	30.64	6.47	6.72
ENSMUSG00000025209	Twnk	-2.29161	5.54118e-62	23.61	22.36	6	6.08
ENSMUSG00000039128	Cdc123	-2.28068	1.65749e-86	76.34	69.07	15.15	15.3
ENSMUSG00000020541	Tom1l1	-2.27789	3.90393e-30	16.62	14.24	2.14	2.19
ENSMUSG00000037552	Plekhg2	-2.27682	7.47632e-24	4.76	5.49	1.1	1.07
ENSMUSG00000019039	Dalrd3	-2.27428	8.63898e-42	27.43	28.24	6.08	5.67
ENSMUSG00000031105	Slc25a14	-2.27244	1.30295e-05	3.25	3.37	0.78	0.65
ENSMUSG00000037349	Nudt22	-2.27205	1.02444e-10	11.47	13.16	2.86	2.34
ENSMUSG00000044551	9930012K11Rik	-2.27026	1.86919e-06	3.7	2.64	0.8	0.54
ENSMUSG00000032519	Slc25a38	-2.26687	6.64225e-45	29.35	31.03	6.09	6.67
ENSMUSG00000117465	Gm49980	-2.26382	0.0124096	1.82	1.69	0.37	0.35
ENSMUSG00000100164	2610306M01Rik	-2.26191	0.00141133	3.09	3.31	0.88	0.48
ENSMUSG00000019948	Actr6	-2.26125	2.55961e-14	9.49	8.87	1.59	2.29
ENSMUSG00000067722	BC003965	-2.25075	2.51778e-36	12.64	13.2	2.84	2.69
ENSMUSG00000024999	Noc3l	-2.25069	2.47792e-71	24.49	22.39	5.1	4.92
ENSMUSG00000017747	Ghdc	-2.24275	1.21079e-13	5.6	5.3	1.26	1.09
ENSMUSG00000021569	Trip13	-2.24079	2.34561e-73	29.95	28.24	5.97	6.56
ENSMUSG00000027076	Timm10	-2.23942	1.64333e-35	84.53	80.45	16.44	19.04
ENSMUSG00000046675	Tmem251	-2.23746	1.11413e-08	2.51	2.17	0.5	0.51
ENSMUSG00000024937	Ehbp1l1	-2.23689	3.47244e-13	3.57	4.22	0.56	1.03
ENSMUSG00000032579	Hemk1	-2.23532	1.83438e-08	3.48	4.09	0.81	0.87
ENSMUSG00000000001	Gnai3	-2.23131	1.15412e-94	51.66	46.14	10.47	10.72
ENSMUSG00000022361	Zhx1	-2.22573	5.18708e-09	2.03	1.54	0.44	0.33
ENSMUSG00000011254	Thg1l	-2.22135	2.91341e-32	17.63	15.87	3.42	3.88
ENSMUSG00000059878	Zfp422	-2.21842	1.61112e-12	4.4	3.56	0.97	0.94
ENSMUSG00000025439	Clns1a	-2.21841	3.10747e-108	138.65	130.64	28.52	30.34
ENSMUSG00000033114	Slc35d2	-2.2161	2.98958e-07	4.77	3.91	0.86	1.18
ENSMUSG00000091462	Gm17084	-2.20684	0.260302	2.84	1.31	0	1.05
ENSMUSG00000018848	Rars	-2.20505	7.37606e-111	100.94	93.48	21.65	21.27
ENSMUSG00000103708	Gm33222	-2.20058	0.0622222	2.21	2.45	0.66	0.38
ENSMUSG00000025016	Tm9sf3	-2.19768	2.317e-75	34.3	31.24	6.91	7.65
ENSMUSG00000036199	Ndufa13	-2.19378	1.12828e-76	118.4	112.62	27.84	23.64
ENSMUSG00000033126	Ybey	-2.18914	2.06922e-12	2.63	2.67	0.53	0.66
ENSMUSG00000021890	Eaf1	-2.18909	4.24944e-80	23.73	24.03	5.67	5.01
ENSMUSG00000021819	Zswim8	-2.17387	1.25303e-32	6.2	6.23	1.58	1.24
ENSMUSG00000024442	Dele1	-2.16973	1.32371e-37	18.56	20.44	4.7	4.38
ENSMUSG00000038520	Tbc1d17	-2.16863	1.45433e-33	13.81	12	0.9	1.26
ENSMUSG00000007589	Tinf2	-2.1678	1.46454e-54	28.77	27.4	6.17	7.11
ENSMUSG00000035762	Tmem161b	-2.16399	1.05192e-11	4.72	4.45	0.8	1.17
ENSMUSG00000031862	Atp13a1	-2.15855	1.20556e-92	50.99	53.93	13.02	10.92
ENSMUSG00000087006	Gm13889	-2.15589	0.00951337	1.44	1.96	0.41	0.34
ENSMUSG00000024426	Atat1	-2.15496	6.95873e-09	6.87	5.88	1.41	1.27
ENSMUSG00000037938	Chchd5	-2.15173	1.55077e-27	25.4	27.62	5.93	6.22
ENSMUSG00000025235	Bbs4	-2.15092	1.18946e-14	6.21	5.91	1.36	1.42
ENSMUSG00000035049	Rrp12	-2.15013	2.9268e-91	33.83	35.94	8.32	7.69
ENSMUSG00000020260	Pofut2	-2.14938	4.02979e-48	26.3	27.45	6.34	6
ENSMUSG00000027698	Nceh1	-2.14773	1.8363e-10	2.35	2.18	0.56	0.48
ENSMUSG00000029221	Slc30a9	-2.14409	7.83284e-25	4.85	5.24	1.01	1.31
ENSMUSG00000059355	Wdr83os	-2.14403	1.57894e-40	69.13	70.27	15.37	17.32
ENSMUSG00000020522	Mfap3	-2.13946	4.98381e-29	7.36	6.65	1.76	1.48
ENSMUSG00000047989	Ino80c	-2.1388	4.21205e-28	16.98	14.94	3.5	3.26
ENSMUSG00000059772	Slx1b	-2.13633	3.40025e-19	6.34	7.2	1.48	1.69
ENSMUSG00000079043	Fastkd5	-2.13164	3.6275e-18	6.73	6.98	1.4	1.91
ENSMUSG00000078570	1110065P20Rik	-2.13139	3.80204e-10	16.81	25.73	4.45	4.22
ENSMUSG00000052906	Ubxn8	-2.13137	4.00268e-20	7.61	7.91	1.81	1.79
ENSMUSG00000032497	Lrrfip2	-2.12781	2.92543e-31	20.92	21.95	3.96	5.25
ENSMUSG00000041035	Dpcd	-2.12681	1.7634e-25	27.44	23.27	6.1	5.71
ENSMUSG00000027353	Mcm8	-2.12649	3.93004e-27	10.48	9.3	2.24	2.33
ENSMUSG00000068758	Il3ra	-2.12267	6.79132e-06	3.08	4.29	0.99	0.73
ENSMUSG00000044881	Coa4	-2.11525	1.59599e-08	9.53	12.39	3.22	1.94
ENSMUSG00000027207	Galk2	-2.11371	1.51315e-18	11.74	10.58	2.69	2.43
ENSMUSG00000073096	Lrrc61	-2.11067	2.06045e-08	2.77	3.36	0.76	0.68
ENSMUSG00000020311	Erlec1	-2.10408	3.56317e-11	4.9	4.46	1.02	1.2
ENSMUSG00000021737	Psmd6	-2.10264	8.88954e-79	116.56	104.62	25.54	26.83
ENSMUSG00000049922	Slc35c1	-2.10101	2.02015e-09	3.03	3.39	0.73	0.73
ENSMUSG00000047909	Ankrd16	-2.09955	3.00096e-07	4.7	4.82	1.02	1.24
ENSMUSG00000020170	Frs2	-2.09431	2.87306e-23	5.32	4.41	0.98	1.34
ENSMUSG00000051235	Gen1	-2.09119	1.26942e-15	3.32	3.14	0.67	0.87
ENSMUSG00000032842	Abcc10	-2.08903	9.63838e-12	2.36	2.53	0.61	0.56
ENSMUSG00000004561	Mettl17	-2.08624	1.50193e-22	18.99	17.04	4.63	3.99
ENSMUSG00000106918	Mrpl33	-2.08574	7.14379e-20	114.18	97.5	20.76	29.75
ENSMUSG00000013822	Elof1	-2.08309	6.21898e-40	71.88	73.3	17	17.27
ENSMUSG00000005150	Wdr83	-2.0827	1.10085e-30	34.1	34.55	8.68	7.82
ENSMUSG00000051502	Ufsp1	-2.08247	0.00252514	3.76	2.79	1.92	0.91
ENSMUSG00000015474	Ppt2	-2.08063	1.67021e-17	12.49	14.26	2.94	3.98
ENSMUSG00000037773	Pced1a	-2.07648	3.92776e-08	3.09	4.18	0.83	0.94
ENSMUSG00000052584	Serp2	-2.0676	0.102487	2.57	1.27	0.38	0.61
ENSMUSG00000013646	Sh3bp5l	-2.06281	1.6919e-31	17.29	16.65	4.87	3.41
ENSMUSG00000078931	Pdf	-2.05473	1.05353e-34	38.52	39.33	8.87	10.25
ENSMUSG00000038023	Atp6v0a2	-2.04785	2.32675e-36	9.74	9.71	2.08	2.7
ENSMUSG00000023104	Rfc2	-2.04711	7.85009e-82	25.89	26.55	6.34	6.59
ENSMUSG00000022833	Ccdc14	-2.04641	7.09506e-24	7.34	6.63	1.65	1.77
ENSMUSG00000028719	Cmpk1	-2.04599	1.63054e-39	20	17.33	4.25	4.94
ENSMUSG00000001518	Itfg2	-2.03869	3.73206e-45	29.15	28.12	7.64	6.59
ENSMUSG00000032867	Fbxw8	-2.03823	2.19684e-59	17.8	16.89	4.49	4.13
ENSMUSG00000021486	Prelid1	-2.03546	1.32296e-117	114.56	123.91	29.14	30.09
ENSMUSG00000038525	Armc10	-2.03459	4.69395e-57	39.61	38.76	9.17	10.18
ENSMUSG00000039810	Zc3h10	-2.03253	4.25894e-31	9.98	10.6	2.52	2.6
ENSMUSG00000040610	Tlx3	-2.03195	0.00408523	1.99	1.71	0.45	0.47
ENSMUSG00000025747	Tyms	-2.03081	5.19406e-60	27.35	27.63	6.97	6.73
ENSMUSG00000046441	Cmtr2	-2.02334	3.26124e-13	4.3	3.96	1.09	0.98
ENSMUSG00000055745	Rtl6	-2.02092	2.6004e-06	1.68	1.72	0.6	0.26
ENSMUSG00000046096	Mosmo	-2.02083	2.12706e-13	7.15	5.65	1.32	1.31
ENSMUSG00000024082	Ndufaf7	-2.01911	9.32561e-27	21.15	20.05	4.83	5.51
ENSMUSG00000020075	Ddx21	-2.0147	1.1258e-147	119.08	118.14	28.69	31.07
ENSMUSG00000014856	Tmem208	-2.01216	5.09675e-25	63.17	53.03	13.64	15.52
ENSMUSG00000009090	Ap1b1	-2.01034	3.34524e-60	24.13	26.53	6.79	6.02
ENSMUSG00000020474	Polm	-2.00907	6.63749e-19	7.87	7.8	1.83	2.06
ENSMUSG00000043065	Spice1	-2.00614	1.00305e-20	5.09	5.2	1.31	1.3
ENSMUSG00000033488	Cryzl2	-2.00599	4.2537e-06	4.59	4.85	1.26	1.12
ENSMUSG00000032041	Tirap	-2.00559	1.18177e-08	2.85	2.94	0.84	0.58
ENSMUSG00000121378	ENSMUSG00000121378	-1.9987	0.137189	0.92	2.31	0.78	0.05
ENSMUSG00000052921	Arhgef15	-1.99201	7.44578e-19	5.63	4.92	1.44	1.26
ENSMUSG00000031513	Leprotl1	-1.9866	7.46304e-22	9.48	9.33	2.27	2.56
ENSMUSG00000036167	Pphln1	-1.98586	4.16756e-24	14.2	13.34	3.59	3.97
ENSMUSG00000026035	Ppil3	-1.98157	4.97043e-16	25.15	24.27	5.06	7
ENSMUSG00000010054	Tusc2	-1.97765	4.82783e-22	20.09	20.23	6.05	4.41
ENSMUSG00000087174	5530601H04Rik	-1.97579	8.67722e-06	3.05	3.14	1.49	1.11
ENSMUSG00000038671	Arfrp1	-1.97376	4.18997e-20	12.74	12.86	3.43	2.68
ENSMUSG00000096215	Smim22	-1.96836	0.00433353	15.35	19.43	5.84	3.26
ENSMUSG00000060510	Zfp266	-1.96729	2.50241e-30	7.72	6.68	1.94	2.25
ENSMUSG00000037361	Sf3b6	-1.96488	6.3104e-43	68.49	63.61	15.89	18.51
ENSMUSG00000039814	Xkr5	-1.96404	5.67203e-22	9.7	11.49	2.59	2.96
ENSMUSG00000031832	Taf1c	-1.96368	3.3941e-38	18.8	20.98	5.76	4.66
ENSMUSG00000015747	Vps45	-1.96177	1.13334e-11	5.68	5.27	1.65	1.21
ENSMUSG00000024259	Slc25a46	-1.95957	9.78963e-22	6.11	5.94	1.54	1.62
ENSMUSG00000059475	Zfp426	-1.95851	1.12609e-07	2.9	3.1	1.09	0.51
ENSMUSG00000004788	Eif2b2	-1.95137	5.61838e-60	65.4	64.14	17.41	16.68
ENSMUSG00000038578	Susd1	-1.95081	1.20762e-07	2.39	3.27	0.63	0.86
ENSMUSG00000034254	Agpat1	-1.94753	8.64856e-48	36.62	42.4	10.58	10.29
ENSMUSG00000040044	Orc3	-1.94027	5.64588e-35	25.15	23.19	5.84	6.96
ENSMUSG00000048007	Timm8a1	-1.93889	2.17344e-24	35.11	29.84	7.27	10
ENSMUSG00000027408	Cpxm1	-1.9311	2.19505e-23	13.01	13.65	3.37	3.75
ENSMUSG00000069208	Zfp825	-1.92971	3.08515e-07	6.63	6.15	1.34	2.09
ENSMUSG00000026575	Nme7	-1.92717	1.83575e-29	31.6	26.56	7.31	8
ENSMUSG00000031823	Zdhhc7	-1.92683	1.55016e-27	11.78	12.86	3.19	3.41
ENSMUSG00000011114	Tbrg1	-1.92482	7.12001e-67	64.95	63.44	16.45	17.99
ENSMUSG00000030180	Kdm5a	-1.92199	4.96956e-47	7.95	7.5	1.86	2.29
ENSMUSG00000047710	Champ1	-1.92116	2.51097e-62	26.94	25.33	7.03	7.02
ENSMUSG00000045455	Gm9797	-1.91796	1.95698e-26	73.17	72.37	15.18	24.02
ENSMUSG00000098789	Jmjd7	-1.91748	1.78826e-17	17.51	20.49	5.36	4.94
ENSMUSG00000022407	Adsl	-1.91571	8.18697e-83	78.3	84.19	20.86	22.09
ENSMUSG00000004100	Ppan	-1.91251	9.02386e-68	124.83	131.36	38.21	31.1
ENSMUSG00000034789	Rab24	-1.91208	2.72488e-21	28.04	28.67	7.13	8.29
ENSMUSG00000021149	Gtpbp4	-1.91153	3.80461e-75	22.72	20.64	5.47	6.26
ENSMUSG00000121485	ENSMUSG00000121485	-1.91069	0.00995487	1.81	2.47	0.22	0.97
ENSMUSG00000029127	Zbtb49	-1.90734	8.93358e-07	2.53	2.81	0.88	0.64
ENSMUSG00000005615	Pcyt1a	-1.907	4.18579e-22	7.36	6.05	1.6	1.83
ENSMUSG00000011658	Fuz	-1.90575	1.77971e-13	11.15	12.98	3.24	2.91
ENSMUSG00000021024	Psma6	-1.90089	3.10289e-81	264.64	239.6	64.96	72.31
ENSMUSG00000030798	Cd37	-1.89954	8.92959e-07	4.68	6	1.7	0.94
ENSMUSG00000003131	Pafah1b2	-1.8971	4.89866e-40	16.05	19.4	7.15	5.82
ENSMUSG00000026134	Prim2	-1.89678	1.44921e-29	23.91	21.76	6.52	5.96
ENSMUSG00000047766	Lrrc49	-1.89107	2.48792e-09	4.46	3.5	1.08	1.11
ENSMUSG00000060038	Dhps	-1.88958	1.15331e-46	62.76	66.29	17.02	18.44
ENSMUSG00000028309	Rnf20	-1.88903	2.03036e-44	17.15	16.01	4.45	4.73
ENSMUSG00000039210	Gpatch2	-1.88778	2.55843e-26	11.08	10.18	2.68	2.64
ENSMUSG00000025956	Mettl21a	-1.88288	1.13734e-07	4.57	4.48	1.35	1.15
ENSMUSG00000087523	Gm12319	-1.88234	0.0930201	1.59	3.15	0.58	0.31
ENSMUSG00000042419	Nfkbil1	-1.88056	4.93627e-11	9.93	12.03	3.29	2.79
ENSMUSG00000073888	Ccl27a	-1.87884	0.0119216	5.69	8.73	2.35	1.73
ENSMUSG00000038500	Prr3	-1.87669	2.15839e-22	18.44	18.29	6.72	5.7
ENSMUSG00000068706	Gm10250	-1.87424	0.241594	3.5	1.83	0.5	1.19
ENSMUSG00000027291	Vps39	-1.87051	2.12252e-29	9.47	10.35	2.61	2.91
ENSMUSG00000015023	Ddx19a	-1.86974	8.42219e-73	67.19	63.54	19.17	17.25
ENSMUSG00000022160	Mettl3	-1.86884	2.96682e-32	24.21	25.45	7.23	6.64
ENSMUSG00000053134	Supt7l	-1.86876	4.19116e-19	9.96	9.29	2.59	2.77
ENSMUSG00000027131	Emc4	-1.86706	7.03e-35	63.84	65.16	17.7	18.27
ENSMUSG00000037376	Trmt6	-1.86698	3.7223e-45	29.37	27.05	7.4	8.33
ENSMUSG00000117499	Gm50010	-1.86652	0.00403523	4.19	1.87	0.92	0.77
ENSMUSG00000023806	Rsph3b	-1.85996	0.00217901	1.76	2.04	0.34	0.58
ENSMUSG00000011958	Bnip2	-1.85755	1.72953e-33	26.93	23.05	7.51	7.85
ENSMUSG00000032109	Nlrx1	-1.85697	1.15302e-17	6.25	7.17	1.9	1.89
ENSMUSG00000036086	Zranb3	-1.8565	2.02233e-29	10.11	9.9	2.63	2.96
ENSMUSG00000098332	Pigbos1	-1.85615	0.00307896	13.36	10.48	3.05	3.61
ENSMUSG00000079009	Gm14139	-1.85374	1.64977e-08	7.35	6.07	1.7	2.07
ENSMUSG00000021598	Med10	-1.85218	8.90014e-33	69.29	66.14	18.69	19.55
ENSMUSG00000015290	Ubl4a	-1.85143	4.23498e-31	18.86	21.75	6.6	5.26
ENSMUSG00000014074	Rnf168	-1.85057	9.96165e-36	13.15	13.1	3.31	3.88
ENSMUSG00000112449	Srp54b	-1.84653	5.1412e-44	26.15	24.53	6.37	7.97
ENSMUSG00000067931	Zfp948	-1.84144	3.68499e-06	3.36	3.29	1.28	0.61
ENSMUSG00000000374	Trappc10	-1.84119	3.41435e-20	5.78	5.3	1.69	1.46
ENSMUSG00000031803	B3gnt3	-1.83603	4.97385e-10	4.17	4	1.2	1.13
ENSMUSG00000072704	Smim10l1	-1.83544	4.72842e-15	11.31	15.05	4.06	3.37
ENSMUSG00000039033	Tasp1	-1.83462	5.96266e-08	4.61	4.54	1.11	1.5
ENSMUSG00000005354	Txn2	-1.83234	1.02369e-78	152.62	149.1	43.85	42.36
ENSMUSG00000061028	Clasrp	-1.832	4.12898e-39	29.54	32.31	8.68	9.01
ENSMUSG00000032571	Pik3r4	-1.82821	2.10154e-39	13.2	13.94	4.11	3.69
ENSMUSG00000026767	Mindy3	-1.82564	1.5369e-14	10.76	8.68	2.46	3.11
ENSMUSG00000032309	Fbxo22	-1.8234	9.30003e-73	78.49	74.99	22.59	21.71
ENSMUSG00000027531	Impa1	-1.82328	1.25229e-40	19.94	22.03	6.23	6.48
ENSMUSG00000000244	Tspan32	-1.816	0.000352885	3.07	3.22	1.03	0.75
ENSMUSG00000072582	Ptrh2	-1.81063	8.82896e-29	14.35	14.01	4.04	4.19
ENSMUSG00000024982	Zdhhc6	-1.81023	6.72174e-23	15.67	15.15	4.39	4.56
ENSMUSG00000097042	Gm17491	-1.80562	0.00033112	1.87	2.25	0.59	0.61
ENSMUSG00000069899	Gm12166	-1.80053	0.00904249	3.3	4.15	1.5	0.72
ENSMUSG00000029003	Mad2l2	-1.79967	1.04607e-15	16.98	18.82	4.99	4.66
ENSMUSG00000049305	Ccdc71	-1.78837	8.55445e-33	18.79	17.48	5.71	4.98
ENSMUSG00000090077	Lime1	-1.78593	3.30155e-11	8.68	8.89	2.95	2.14
ENSMUSG00000080921	Rpl38-ps2	-1.78317	0.330915	86.96	32.16	25.12	16.35
ENSMUSG00000055041	Commd5	-1.78206	5.86011e-16	25.55	30.84	8.47	8.23
ENSMUSG00000038346	Zfp384	-1.78065	7.28119e-58	39.38	39.21	11.94	12.01
ENSMUSG00000107283	Mpv17	-1.77734	1.14317e-22	23.44	26.05	9.58	8.35
ENSMUSG00000021666	Gfm2	-1.77726	9.12572e-43	23.42	25.14	7.37	6.91
ENSMUSG00000040345	Arhgap9	-1.77682	3.51333e-08	6.94	6.08	2.25	1.65
ENSMUSG00000035824	Tk2	-1.77612	2.72044e-12	7.11	7.89	1.96	2.58
ENSMUSG00000073568	Arl14epl	-1.77226	3.92278e-52	50.02	49.11	13.81	15.72
ENSMUSG00000121028	ENSMUSG00000121028	-1.77201	0.0228019	4.63	4.59	1.19	1.71
ENSMUSG00000058586	Serhl	-1.76897	9.40584e-10	10.15	10.79	2.88	3.39
ENSMUSG00000042660	Wdr55	-1.76593	4.03275e-47	59.25	61.13	17.15	18.87
ENSMUSG00000002603	Tgfb1	-1.76536	1.04102e-13	10.27	8.81	3.01	2.7
ENSMUSG00000068522	Aard	-1.76346	2.57491e-07	10.15	9.41	2.01	3.84
ENSMUSG00000079144	A130010J15Rik	-1.75949	1.59132e-09	5.04	4.95	1.44	1.45
ENSMUSG00000024953	Prdx5	-1.75752	6.17511e-41	65.1	63.79	19.39	19.3
ENSMUSG00000096847	Tmem151b	-1.75702	1.58223e-10	2.84	2.9	0.94	0.8
ENSMUSG00000121163	ENSMUSG00000121163	-1.75481	0.0540008	2.56	1.56	0.82	0.42
ENSMUSG00000020831	0610010K14Rik	-1.75084	3.03205e-25	70.51	73.61	22.6	21.57
ENSMUSG00000026849	Tor1a	-1.74758	1.46366e-22	27.37	28.19	8.76	8.09
ENSMUSG00000018919	Tm4sf5	-1.74427	0.0369773	2.74	2	0.85	0.59
ENSMUSG00000038895	Zfp653	-1.7439	1.0995e-08	6.29	5.69	1.66	1.98
ENSMUSG00000020523	Fam114a2	-1.74303	3.01369e-36	24.59	25.62	7.52	7.62
ENSMUSG00000118125	Gm50387	-1.74225	4.93765e-09	4.64	5.25	1.45	1.57
ENSMUSG00000031792	Usb1	-1.73959	5.48674e-26	32.44	29.98	10.76	8.27
ENSMUSG00000022175	Lrp10	-1.73893	1.21382e-22	8.12	9.32	2.78	2.56
ENSMUSG00000027411	Vps16	-1.73618	3.44637e-38	21.97	21.4	6.93	6.32
ENSMUSG00000015790	Surf1	-1.73363	5.45534e-10	17.95	14.54	5.9	4.04
ENSMUSG00000028899	Taf12	-1.73083	1.80205e-24	10.43	10.24	2.97	3.37
ENSMUSG00000019235	Rps6kl1	-1.72697	1.03215e-07	3.51	3.91	1.23	1.06
ENSMUSG00000028567	Txndc12	-1.72597	8.89579e-23	42.42	35.37	10.45	13.43
ENSMUSG00000026848	Tor1b	-1.72321	2.27362e-26	14.35	13.81	4.45	4.23
ENSMUSG00000005510	Ndufs3	-1.71991	3.33422e-40	86.6	82.68	26.42	25.84
ENSMUSG00000055305	Zfp93	-1.71729	7.04251e-08	3.68	4.21	1.44	1.33
ENSMUSG00000027404	Snrpb	-1.71707	3.32934e-100	376.95	389.89	121.05	116.31
ENSMUSG00000092072	Gm4540	-1.71304	0.197488	3.54	7.04	0.89	2.73
ENSMUSG00000067928	Zfp760	-1.7126	1.42331e-05	1.91	1.49	0.54	0.51
ENSMUSG00000044600	Smim7	-1.7124	8.77282e-47	35.85	37.41	13.39	12.64
ENSMUSG00000003526	Prodh	-1.71099	4.31561e-14	9.33	8.77	2.68	2.96
ENSMUSG00000079884	Tmed2b	-1.70735	0.625697	4.18	3.47	0	2.42
ENSMUSG00000036639	Nudt1	-1.70696	1.19893e-30	76.02	74.98	24.29	23.61
ENSMUSG00000114625	Gm48218	-1.70544	0.321118	1.71	1.42	1.06	0.08
ENSMUSG00000048865	Arhgap30	-1.70044	1.31371e-08	2.49	2.71	0.77	0.86
ENSMUSG00000025138	Sirt7	-1.69645	3.6466e-11	10.04	10.13	3.38	2.96
ENSMUSG00000001348	Acp5	-1.69462	0.000148154	4.27	5.18	1.62	1.39
ENSMUSG00000065990	Aurkaip1	-1.69324	4.67224e-49	111.05	118.69	36.95	36.4
ENSMUSG00000057411	Antkmt	-1.69189	4.42339e-07	14.15	15.51	5.57	5.06
ENSMUSG00000113406	Gm7762	-1.69115	0.17223	2.36	2.88	0.65	0.94
ENSMUSG00000057572	Zbtb8os	-1.69075	2.77113e-25	60.55	59.12	12.17	10.07
ENSMUSG00000039725	Trp53rka	-1.69051	2.13525e-18	17	15.82	5.31	5.07
ENSMUSG00000115219	Eef1akmt4	-1.68921	2.51132e-09	13.34	13.86	4.26	4.34
ENSMUSG00000022610	Mapk12	-1.68861	0.0137461	1.39	1.8	0.41	0.6
ENSMUSG00000022635	Zcrb1	-1.68573	3.60655e-14	32.6	33.85	9.41	11.61
ENSMUSG00000022427	Tomm22	-1.68374	6.79947e-46	83.02	82.08	23.43	29.06
ENSMUSG00000048200	Cracr2b	-1.6809	0.00218581	2.32	2.84	1	0.64
ENSMUSG00000022503	Nubp1	-1.67757	2.74403e-45	45.35	46.22	15.12	14.03
ENSMUSG00000030979	Uros	-1.67598	4.76751e-09	9.05	9.58	2.74	2.91
ENSMUSG00000024404	Riok3	-1.6744	1.9637e-35	19.52	17.44	6.03	5.75
ENSMUSG00000015468	Notch4	-1.6736	1.91665e-11	2.42	3.15	0.84	0.94
ENSMUSG00000047721	Bola2	-1.67135	4.75901e-36	63.27	68.63	20.97	20.69
ENSMUSG00000027540	Ptpn1	-1.67069	9.14835e-37	17.23	18	6.03	5.25
ENSMUSG00000052253	Zfp622	-1.67068	1.95803e-49	42.21	39.67	13.68	12.5
ENSMUSG00000005505	Kbtbd4	-1.66965	2.38165e-20	16.53	15.43	4.51	5.72
ENSMUSG00000038102	Trappc11	-1.66952	6.52188e-46	23.9	24.44	7.17	8.34
ENSMUSG00000026755	Arpc5l	-1.66823	1.28594e-29	45.5	45.81	13.78	15.44
ENSMUSG00000047238	Mageh1	-1.66376	2.07667e-06	6.91	6.85	2.3	2.12
ENSMUSG00000038208	Pgap3	-1.66365	3.54163e-06	3.74	3.79	1.44	0.98
ENSMUSG00000058192	Zfp846	-1.66329	0.000138114	2.22	2	0.91	0.66
ENSMUSG00000112964	E430024I08Rik	-1.66223	4.70204e-05	2.22	2.35	0.76	0.72
ENSMUSG00000002963	Pnkp	-1.66175	8.62447e-26	26.26	24.45	9.13	8.05
ENSMUSG00000091931	Gon7	-1.6601	7.59774e-13	20.82	20.15	6.06	7.14
ENSMUSG00000024926	Kat5	-1.65535	1.63777e-28	28.32	28.92	10.28	8.8
ENSMUSG00000095180	Rhox5	-1.6551	0.000104813	9.76	8.15	2.52	3.25
ENSMUSG00000018171	Vmp1	-1.65452	2.39827e-35	25.15	24.08	7.7	8.21
ENSMUSG00000050229	Pigm	-1.65083	7.22303e-24	5.38	5.03	1.71	1.67
ENSMUSG00000028890	Mtf1	-1.64911	4.8502e-19	4.06	3.98	1.4	1.21
ENSMUSG00000113450	Zfp935	-1.64738	0.000500249	2.08	2.21	0.83	0.56
ENSMUSG00000021018	Polr2h	-1.64432	6.14524e-35	96.53	89.98	31.93	29.47
ENSMUSG00000092225	Gm2381	-1.63753	4.1736e-07	2.63	2.62	0.7	1.01
ENSMUSG00000046806	Cyren	-1.63662	0.000315894	1.76	3.13	0.54	0.73
ENSMUSG00000028455	Stoml2	-1.6353	1.49603e-70	141.19	141.01	48.88	43.62
ENSMUSG00000028293	Slc35a1	-1.63499	7.35674e-18	17.02	14.87	5.09	5.35
ENSMUSG00000045257	Morn2	-1.63037	0.0093749	8.07	6.54	1.91	2.94
ENSMUSG00000069844	Sco1	-1.62953	7.20149e-19	13.21	14.16	4.37	4.63
ENSMUSG00000075012	Fjx1	-1.62862	1.32791e-08	3.9	4.44	1.29	1.46
ENSMUSG00000031304	Il2rg	-1.62689	2.18257e-05	4.48	5.23	1.47	1.73
ENSMUSG00000034173	Chchd2l	-1.62525	4.44033e-08	4.7	5.05	1.6	1.61
ENSMUSG00000036743	Psma8	-1.62329	2.24113e-06	5.71	5.95	1.81	2.15
ENSMUSG00000073434	Wdr90	-1.61982	7.31017e-19	5.24	6.28	1.96	1.86
ENSMUSG00000024668	Sdhaf2	-1.61833	6.68934e-16	16.2	17.31	5.09	6.78
ENSMUSG00000074283	Zfp109	-1.61777	0.00541374	1.17	1.99	0.57	0.44
ENSMUSG00000090733	Rps27	-1.61555	2.41009e-71	3198.42	3093.03	944.32	1134.73
ENSMUSG00000035575	Utp6	-1.60964	6.86146e-47	41.82	36.53	12.25	13.87
ENSMUSG00000031948	Kars	-1.60488	1.79251e-106	318.97	324.03	105.57	109.51
ENSMUSG00000078656	Vps25	-1.6031	2.31694e-39	93.76	90.22	31.71	30.19
ENSMUSG00000026694	Eef1aknmt	-1.60131	1.39244e-18	10.11	10.37	4.11	2.77
ENSMUSG00000031875	Cmtm3	-1.60043	1.07815e-10	12.15	12.85	4.52	3.86
ENSMUSG00000020736	Nt5c	-1.60018	1.26124e-10	26.68	27.53	10.2	7.97
ENSMUSG00000020910	Adprm	-1.60005	2.53762e-07	11.84	11.91	2.92	5.04
ENSMUSG00000035293	G2e3	-1.59794	9.58516e-16	5.42	5.07	1.43	1.74
ENSMUSG00000051730	Mettl5	-1.59769	2.23196e-08	18.97	20.52	5.08	8.18
ENSMUSG00000029551	Psmg3	-1.59494	1.3698e-12	29.48	33.25	10.52	10.41
ENSMUSG00000073460	Pnldc1	-1.59396	2.04419e-11	9.31	8.98	2.96	3.21
ENSMUSG00000050144	Slc25a44	-1.59393	6.38836e-21	10.57	10.92	3.4	3.84
ENSMUSG00000017679	Ttpal	-1.58959	5.27468e-09	3.65	3.6	1.23	1.17
ENSMUSG00000022971	Ifnar2	-1.58868	3.48211e-05	4.3	4.36	1.32	1.75
ENSMUSG00000051457	Spn	-1.58805	1.12298e-05	2.4	2.03	0.83	0.67
ENSMUSG00000036435	Exoc1	-1.58683	6.72869e-19	10.32	9.67	3.33	3.48
ENSMUSG00000042042	Csgalnact2	-1.58484	8.84166e-06	2.49	2.16	0.7	0.88
ENSMUSG00000051864	Tbc1d22a	-1.58363	7.73322e-17	8.82	9.84	3.08	3.26
ENSMUSG00000021636	Marveld2	-1.58357	0.000298045	1.81	2.06	0.58	0.7
ENSMUSG00000000486	Septin1	-1.58062	2.20087e-94	335.15	336.48	116.44	112.1
ENSMUSG00000001158	Snrnp27	-1.58	2.16013e-23	63.39	66.77	20.97	23.27
ENSMUSG00000005846	Rsl1d1	-1.57465	8.22209e-61	146.42	138.8	45.15	52.27
ENSMUSG00000027010	Slc25a12	-1.57404	1.2869e-22	6.43	6.3	2.26	2.09
ENSMUSG00000030929	Eri2	-1.5738	1.60983e-11	5.91	5.11	1.87	1.86
ENSMUSG00000046798	Cldn12	-1.57195	6.57994e-18	8.89	8.79	3.18	2.88
ENSMUSG00000006200	Rhox6	-1.56692	0.0242788	4.87	2.28	1.07	1.37
ENSMUSG00000023723	Mrps23	-1.56531	6.18444e-25	144.31	129.49	33.57	42.11
ENSMUSG00000040247	Tbc1d10c	-1.56203	0.0146327	2.51	1.56	0.9	0.54
ENSMUSG00000028898	Trnau1ap	-1.56066	7.21569e-23	46.52	50.21	17.65	15.7
ENSMUSG00000062007	Hsh2d	-1.55759	0.013808	1.99	1.54	0.66	0.56
ENSMUSG00000054484	Tmem62	-1.5563	0.000329966	2.15	2.19	0.73	0.7
ENSMUSG00000066438	Plekhd1	-1.55552	0.000819275	1.36	1.61	0.6	0.43
ENSMUSG00000010406	Mrpl52	-1.55543	1.05867e-22	241.67	274.32	84.94	94.42
ENSMUSG00000034032	Rpap1	-1.55469	7.91994e-54	39.42	44.51	15.14	14.08
ENSMUSG00000073468	Sft2d1	-1.54214	4.64875e-16	36.36	32.67	12.52	11.66
ENSMUSG00000001380	Hars	-1.54069	3.2307e-47	72.45	72.08	23.74	26.85
ENSMUSG00000038543	BC028528	-1.53774	0.0419946	4.84	3.72	1.21	2.47
ENSMUSG00000042854	Trp53rkb	-1.53685	1.49689e-08	3.51	3.46	1.52	1.24
ENSMUSG00000028798	Eif3i	-1.53581	3.58317e-66	279.69	291.01	95.25	105.01
ENSMUSG00000035325	Sec31a	-1.53416	3.37471e-65	52.92	53.72	19.45	18.1
ENSMUSG00000037089	Slc35b2	-1.53394	3.27547e-24	39.1	41.31	16.09	13.46
ENSMUSG00000074217	Misp3	-1.53175	7.51957e-05	5.63	6.54	1.95	2.34
ENSMUSG00000030677	Kif22	-1.531	1.19726e-51	80.55	73.53	26.92	27.32
ENSMUSG00000039615	Stub1	-1.52912	1.65155e-53	88.89	93.18	32.94	31.66
ENSMUSG00000009549	Srp14	-1.52838	5.66663e-27	103.09	93.13	34.95	34.34
ENSMUSG00000113123	Gm40864	-1.52769	0.194482	2.13	1.86	0.6	0.8
ENSMUSG00000027475	Kif3b	-1.52614	1.93457e-17	5.71	5.88	1.9	2.2
ENSMUSG00000105879	Gm6204	-1.52539	0.173367	5.59	4.54	1.67	1.89
ENSMUSG00000044763	Trmt10c	-1.52475	5.34472e-19	12.27	12.26	4.11	4.57
ENSMUSG00000074513	Arfip1	-1.52402	3.29594e-12	12.16	10.19	3.42	3.99
ENSMUSG00000075590	Nrbp2	-1.52258	0.00331639	1.62	1.35	0.51	0.56
ENSMUSG00000107659	Gm44170	-1.52112	0.737989	9.26	15.6	8.78	0
ENSMUSG00000021385	Ippk	-1.51962	2.40473e-12	5.35	5.99	2.56	1.92
ENSMUSG00000074731	Zfp345	-1.51819	3.88107e-05	3.29	3.19	0.86	1.43
ENSMUSG00000073079	Srp54a	-1.51717	4.83802e-24	17.22	14.27	5	8.66
ENSMUSG00000043671	Dpy19l3	-1.51645	8.16282e-08	1.44	1.67	0.57	0.54
ENSMUSG00000035086	Becn1	-1.5163	1.27245e-31	29.96	30.26	8.11	9.54
ENSMUSG00000074238	Ap1ar	-1.51587	5.07501e-30	24.62	24.43	8.62	8.84
ENSMUSG00000000355	Mcts1	-1.51334	1.34634e-07	24.97	23.88	6.95	10.42
ENSMUSG00000027751	Supt20	-1.51241	3.19205e-38	40.1	37.1	14.07	14.38
ENSMUSG00000063480	Snu13	-1.5112	4.31349e-67	133.17	131.54	45.38	49.11
ENSMUSG00000031392	Irak1	-1.50945	4.15249e-24	13.27	14.32	4.9	4.79
ENSMUSG00000021040	Slirp	-1.50917	1.00142e-23	26.33	28.19	8.68	8.08
ENSMUSG00000079108	Srp54c	-1.50901	2.68294e-21	21.12	18.24	5.68	7.67
ENSMUSG00000038550	Ciart	-1.50893	1.44746e-05	6.69	6.55	2.38	2.32
ENSMUSG00000032890	Rims3	-1.50623	1.81614e-07	2.43	2.28	0.93	1.16
ENSMUSG00000002500	Rpl3l	-1.50433	0.0690187	1.67	1.41	0.62	0.49
ENSMUSG00000041638	Gcn1	-1.50389	2.02137e-54	23.9	25.7	9.43	8.39
ENSMUSG00000035382	Pcsk7	-1.50338	2.44754e-13	6.96	6.66	2.8	2.21
ENSMUSG00000027447	Cst3	-1.50308	5.05277e-31	105.61	104.78	38.83	36.66
ENSMUSG00000024319	Vps52	-1.50091	1.37419e-28	18.09	18.51	6.76	6.42
ENSMUSG00000023572	Ccndbp1	-1.50089	3.49955e-16	22.36	20.76	7.52	7.87
ENSMUSG00000025156	Gps1	-1.49982	3.44458e-52	96.63	100.36	33.17	36.37
ENSMUSG00000048440	Cyp4f16	-1.49765	6.18514e-06	4.36	4.9	1.43	1.9
ENSMUSG00000041841	Rpl37	-1.49509	3.37065e-92	1067.96	1111.97	385.52	401.08
ENSMUSG00000035051	Dhx57	-1.49494	2.08104e-19	8.27	8.31	3.23	2.77
ENSMUSG00000024007	Ppil1	-1.49478	7.17956e-60	149.57	156.23	54.57	55.88
ENSMUSG00000026926	Pmpca	-1.49067	1.99162e-60	73.25	71.05	26.22	27.95
ENSMUSG00000031537	Ikbkb	-1.48971	1.83715e-16	9.31	9.39	3.05	3.73
ENSMUSG00000021194	Chga	-1.48811	8.42636e-14	14.79	16.77	6.18	5.29
ENSMUSG00000050854	Tmem125	-1.48802	0.00533306	2.29	2.64	1.15	0.64
ENSMUSG00000016206	H2-M3	-1.48513	0.0205165	2.68	2.01	0.68	1.01
ENSMUSG00000038685	Rtel1	-1.48299	1.59614e-44	27.74	29.18	10.64	10.07
ENSMUSG00000033009	Ogfod1	-1.48282	1.92248e-25	11.63	10.33	3.85	4.15
ENSMUSG00000063802	Hspbp1	-1.47943	3.17626e-28	46.52	45.85	17.91	15.81
ENSMUSG00000028016	Ints12	-1.47908	1.41798e-14	9.1	8.79	3.19	3.33
ENSMUSG00000025245	Lztfl1	-1.47722	1.71838e-05	2.87	2.39	0.7	1.22
ENSMUSG00000052155	Acvr2a	-1.47576	1.09881e-05	1.54	1.63	0.52	0.64
ENSMUSG00000004221	Ikbkg	-1.47379	1.70911e-10	4.23	5.19	2.22	1.67
ENSMUSG00000081297	Gm12209	-1.47347	0.305858	2.16	2.03	1	0.61
ENSMUSG00000046516	Cox17	-1.47309	2.86973e-33	397.42	375.22	144.64	137.33
ENSMUSG00000020718	Polg2	-1.47209	0.00130446	4.3	4.21	1.11	2
ENSMUSG00000060716	Plekhh1	-1.47115	8.87852e-23	7.35	7.14	2.57	2.73
ENSMUSG00000073616	Cops9	-1.46956	2.23935e-14	138.68	133.68	48.12	51.62
ENSMUSG00000089857	Zfp882	-1.46792	0.000501287	1.96	1.88	0.64	0.77
ENSMUSG00000050357	Carmil2	-1.46767	8.59126e-10	5.28	5.73	2.49	1.58
ENSMUSG00000034109	Golim4	-1.46617	0.000412254	1.22	1.85	0.57	0.54
ENSMUSG00000038957	Edc3	-1.46546	3.02404e-28	12.4	12.11	4.89	4.17
ENSMUSG00000051185	Fam174a	-1.46529	0.00797476	1.8	1.88	0.62	0.73
ENSMUSG00000024844	Banf1	-1.46516	1.26888e-61	298.99	286.37	102.31	108.05
ENSMUSG00000030780	Rusf1	-1.46362	2.09667e-07	4.87	5.05	1.93	1.76
ENSMUSG00000074863	Platr25	-1.46346	0.000621415	2.95	2.37	1.1	0.92
ENSMUSG00000028223	Decr1	-1.46147	8.25397e-06	3.9	3.07	1.18	1.39
ENSMUSG00000094942	Gm3604	-1.45989	0.012055	1.6	1.93	0.51	1.06
ENSMUSG00000037239	Spred3	-1.45861	0.000113067	1.73	1.82	0.62	0.69
ENSMUSG00000007034	Slc44a4	-1.45687	4.02252e-06	4.87	4.52	1.76	1.71
ENSMUSG00000028889	Yrdc	-1.45643	6.35435e-30	48.44	51.5	17.75	19.35
ENSMUSG00000102644	Thap6	-1.4533	4.20688e-05	3.36	2.86	1.27	1.49
ENSMUSG00000026095	Asnsd1	-1.45103	1.05407e-22	28.2	26.05	8.8	10.61
ENSMUSG00000054136	Adm2	-1.45094	0.0827849	1.36	1.96	0.72	0.52
ENSMUSG00000047603	Zfp235	-1.4502	9.78473e-06	2.98	2.68	1.02	1.08
ENSMUSG00000048967	Yjefn3	-1.44987	0.0973304	3.42	2.54	0.97	1.23
ENSMUSG00000078784	Rbis	-1.44975	2.50982e-12	193.94	162.29	49.63	82.86
ENSMUSG00000025354	Dnajc14	-1.44629	5.01061e-24	20.58	19.15	8.5	8.22
ENSMUSG00000064289	Tank	-1.44253	0.000264406	3.62	3.13	1.32	1.12
ENSMUSG00000045273	Cenph	-1.44201	1.90699e-19	50.08	52.18	16.38	21.89
ENSMUSG00000092837	Rpph1	-1.44142	1.01551e-07	294.85	283.18	138.64	75.6
ENSMUSG00000031568	Rwdd4a	-1.44015	7.48551e-22	18.38	17.18	6.23	7.1
ENSMUSG00000034220	Gpc1	-1.43966	5.75102e-14	7.9	7.57	3.32	2.49
ENSMUSG00000096740	Lbhd1	-1.43884	2.87186e-16	10.87	10.42	3.86	4.16
ENSMUSG00000029557	Mrm2	-1.43788	2.06206e-12	21.16	19.13	6.85	8.26
ENSMUSG00000036398	Ppp1r11	-1.43623	7.90748e-24	64.29	69.45	35.42	30.69
ENSMUSG00000072692	Rpl37rt	-1.43622	5.90276e-14	116.05	147.37	54.96	46.74
ENSMUSG00000041625	Ggact	-1.43495	1.45598e-05	11.24	10.02	4.28	3.72
ENSMUSG00000027582	Zgpat	-1.43462	1.61346e-17	21.45	21.85	9.11	7.19
ENSMUSG00000025421	Hdhd2	-1.43419	8.3963e-17	20.82	21.15	8.3	8.02
ENSMUSG00000024829	Mrpl21	-1.43408	5.06041e-29	126.16	131.69	42.96	49.17
ENSMUSG00000023170	Gps2	-1.43406	9.31335e-11	22.44	21.44	9.33	7.36
ENSMUSG00000021917	Spcs1	-1.43322	1.17857e-19	89.13	81.47	24.5	22.94
ENSMUSG00000031562	Dctd	-1.42905	3.02404e-28	43.36	47.05	15.27	18.64
ENSMUSG00000025158	Rfng	-1.42733	4.62204e-17	17.3	18.82	6.83	6.85
ENSMUSG00000027245	Hypk	-1.4253	6.35735e-47	238.26	213.94	85.45	82.57
ENSMUSG00000029404	Arl6ip4	-1.42407	1.8652e-25	57.95	57.8	22.45	21.82
ENSMUSG00000023191	P3h3	-1.4234	0.000591907	2.23	2.37	0.71	1.03
ENSMUSG00000066652	Lefty2	-1.42291	1.43954e-46	94.08	102.09	34.58	39.91
ENSMUSG00000022544	Eef2kmt	-1.42271	5.55309e-08	7.1	8.08	2.55	3.22
ENSMUSG00000042759	Apobr	-1.42203	1.56434e-08	5.08	4.15	1.86	1.65
ENSMUSG00000037525	Bcdin3d	-1.42156	0.00012631	7.04	6.56	2.71	2.46
ENSMUSG00000030750	Nsmce1	-1.42117	6.39258e-12	33.9	31.99	10.12	14.87
ENSMUSG00000062797	Hikeshi	-1.42023	8.69054e-24	32.56	30.91	14.43	16.1
ENSMUSG00000031546	Gins4	-1.41574	5.36553e-40	105.44	98.11	38.08	39.52
ENSMUSG00000097167	Gm16740	-1.41564	0.0957181	2.02	1.43	0.54	0.92
ENSMUSG00000083718	Ccnb2-ps	-1.41441	0.0200469	1.65	3.84	0.68	0.87
ENSMUSG00000031256	Cstf2	-1.41427	3.86222e-36	27.33	27.81	9.64	10.95
ENSMUSG00000021037	Ahsa1	-1.41287	3.23052e-72	321.93	318.55	125.32	119.49
ENSMUSG00000016495	Plgrkt	-1.40926	0.00296799	7.2	5.89	2.84	2.76
ENSMUSG00000034931	Dhx8	-1.40888	2.25033e-44	30.83	30.35	11.89	11.58
ENSMUSG00000003421	Nosip	-1.40884	2.83317e-29	54.44	51.34	23.25	21.21
ENSMUSG00000024271	Elp2	-1.40861	5.00942e-46	46.63	46.08	16.99	18.13
ENSMUSG00000046997	Spsb4	-1.407	0.00760232	1.84	1.58	0.87	0.44
ENSMUSG00000020993	Trappc6b	-1.4065	2.17759e-15	38.18	31.87	12.28	14.26
ENSMUSG00000026578	Ccdc181	-1.40391	0.000128311	4.62	4.23	1.92	1.48
ENSMUSG00000091594	Gm17067	-1.40333	3.85971e-09	6.54	5.69	2.19	2.48
ENSMUSG00000120765	ENSMUSG00000120765	-1.4031	0.513453	1.35	2.85	1.62	0
ENSMUSG00000026281	Dtymk	-1.40252	2.34921e-45	324.66	309.01	131.57	110.95
ENSMUSG00000078869	Gm14409	-1.4016	0.181673	1.92	1.34	0.3	0.96
ENSMUSG00000042097	Zfp239	-1.40155	7.16918e-09	6.15	5.72	2.02	2.53
ENSMUSG00000001665	Gstt3	-1.40153	0.00097362	3.73	3.62	1.26	1.73
ENSMUSG00000113569	Gm48035	-1.39672	0.0930161	1.61	1.52	0.34	0.87
ENSMUSG00000028932	Psmc2	-1.39612	4.0981e-45	119.23	111.13	41.89	47.15
ENSMUSG00000021681	Aggf1	-1.39008	1.13187e-38	37.35	35.08	14.16	13.97
ENSMUSG00000059142	Zfp945	-1.38989	1.19485e-05	1.71	1.54	0.66	0.61
ENSMUSG00000073433	Arhgdig	-1.3873	0.00073598	7.44	7.72	2.52	3.37
ENSMUSG00000115423	Gm56450	-1.3857	3.02928e-05	17.8	12.73	4.77	7.08
ENSMUSG00000097448	Platr22	-1.38549	0.024129	2.41	1.92	0.68	1
ENSMUSG00000038039	Gcc2	-1.37612	3.85597e-14	4.53	4.42	1.7	1.8
ENSMUSG00000040018	Cox15	-1.37566	2.01873e-19	10.04	9.52	3.6	4.08
ENSMUSG00000067367	Lyar	-1.37475	1.35534e-39	113.61	106.29	40.35	45.9
ENSMUSG00000090553	Snrpe	-1.37468	4.1536e-31	525.33	478.56	173.05	217.68
ENSMUSG00000074358	Ccdc61	-1.37315	2.67709e-16	18.66	19.39	7.33	7.62
ENSMUSG00000034445	Cyb561a3	-1.37173	1.33448e-09	7.79	7.48	2.68	3.21
ENSMUSG00000027935	Rab13	-1.37016	0.00242574	5.5	5.87	2.57	1.88
ENSMUSG00000028700	Pomgnt1	-1.36858	7.92853e-27	25.62	26.32	10.13	10.36
ENSMUSG00000115684	Gm6087	-1.36787	0.354583	0.95	2.64	0.76	0.68
ENSMUSG00000044982	Sft2d3	-1.36617	0.00982965	1.31	1.74	0.61	0.6
ENSMUSG00000022711	Pmm2	-1.36201	2.98803e-16	23.56	21.44	8.5	9.32
ENSMUSG00000038268	Ovca2	-1.3613	3.25421e-16	15.62	14.02	6.11	5.66
ENSMUSG00000007415	Gatad1	-1.36124	4.19052e-20	52.76	49.01	17.92	21.72
ENSMUSG00000051671	Coa6	-1.36049	1.09813e-10	41.17	42.56	15.84	17.17
ENSMUSG00000078503	Zfp990	-1.35704	1.08589e-15	16.07	13.45	5.36	6.35
ENSMUSG00000050714	Zbtb26	-1.35598	0.0010718	1.57	1.21	0.47	0.88
ENSMUSG00000027613	Eif6	-1.35446	2.48099e-50	202.89	195.39	83.9	74.72
ENSMUSG00000036537	Rnf113a1	-1.35444	0.00354881	4.8	5.86	2.68	1.58
ENSMUSG00000001844	Zdhhc4	-1.35359	3.55859e-10	20.03	20.99	6.96	9.32
ENSMUSG00000078932	CN725425	-1.35307	0.0412144	1.52	1.33	0.68	0.47
ENSMUSG00000050621	Rps27rt	-1.35284	0.00134764	48.04	43.47	15.16	21.17
ENSMUSG00000014771	Pdcd2	-1.35251	2.94473e-14	43.61	35.28	16	15.28
ENSMUSG00000064127	Med14	-1.35234	6.70352e-14	4.49	4.77	1.94	1.89
ENSMUSG00000037017	Zscan21	-1.3507	2.04063e-14	14.89	14.49	5.67	5.99
ENSMUSG00000027522	Stx16	-1.35024	1.58912e-17	11.08	12.92	4.79	4.84
ENSMUSG00000120401	ENSMUSG00000120401	-1.34942	0.137258	1.65	1.7	0.93	0.41
ENSMUSG00000078894	2210418O10Rik	-1.34932	0.79613	2.38	3.18	0	2.24
ENSMUSG00000025103	Btbd1	-1.34918	1.24307e-17	14.58	13.66	5.58	5.7
ENSMUSG00000019814	Ltv1	-1.3489	1.07127e-29	38.72	37.93	14.76	15.86
ENSMUSG00000032705	Exd2	-1.34849	5.61577e-13	9.23	8.96	3.94	3.34
ENSMUSG00000087179	5730471H19Rik	-1.34776	1.14215e-24	21.23	21.35	7.9	8.74
ENSMUSG00000035781	R3hdm4	-1.3454	4.87231e-18	24.96	24.47	9.41	10.39
ENSMUSG00000019188	H13	-1.34475	1.38753e-20	22.39	23.42	8.83	7.8
ENSMUSG00000087497	2810001G20Rik	-1.34422	0.114395	2.83	3.21	0.55	1.79
ENSMUSG00000003604	Aven	-1.34396	2.78929e-06	22.7	22.75	10.6	7.62
ENSMUSG00000003660	Snrnp200	-1.3416	1.12177e-50	46.82	51.64	20.71	18.87
ENSMUSG00000022199	Slc22a17	-1.34123	2.8821e-06	5.35	6.49	2.66	2.09
ENSMUSG00000049401	Ogfr	-1.34113	1.25651e-14	17.69	18.47	8.33	6.21
ENSMUSG00000029066	Mrpl20	-1.33982	3.08882e-24	131.48	121.39	47.76	53.2
ENSMUSG00000019578	Ubxn6	-1.33791	2.70054e-13	11.64	13.11	5.59	4.4
ENSMUSG00000021276	Cinp	-1.33713	3.37772e-17	51.34	42.42	18.96	20.53
ENSMUSG00000005804	Bloc1s6	-1.33466	7.28508e-11	7.28	6.63	2.65	2.96
ENSMUSG00000041354	Rgl2	-1.3314	3.30227e-23	18.86	20.55	8.11	7.84
ENSMUSG00000045391	1700120B22Rik	-1.33091	0.490514	2.59	1.72	0.87	0.86
ENSMUSG00000029403	Cdkl2	-1.32972	7.81991e-05	2.53	2.35	1.1	0.93
ENSMUSG00000032126	Hmbs	-1.32874	4.60473e-20	38.26	41.75	14.93	17.49
ENSMUSG00000068114	Ccdc134	-1.32729	0.000215075	5.25	4.81	1.45	2.62
ENSMUSG00000071645	Tut1	-1.32597	1.94189e-23	26.15	25.43	11.26	9.69
ENSMUSG00000033430	Terf2ip	-1.32185	1.58912e-17	12.24	11.72	4.84	4.92
ENSMUSG00000026436	Elk4	-1.32163	0.00185093	1.5	1.36	0.46	0.68
ENSMUSG00000038718	Pbx3	-1.321	0.00449465	1.88	1.93	0.78	0.77
ENSMUSG00000035171	1110059E24Rik	-1.31995	8.68526e-13	22.73	20.58	8.66	9.26
ENSMUSG00000018569	Cldn7	-1.31559	1.33545e-05	11.96	11.28	3.89	4.61
ENSMUSG00000018167	Stard3	-1.31368	7.10114e-13	14.85	15.2	6.24	6.07
ENSMUSG00000063108	Zfp26	-1.31325	4.01714e-10	2.25	2.04	0.76	0.99
ENSMUSG00000062312	Erbb2	-1.31255	8.28327e-11	4.87	4.65	2.06	1.85
ENSMUSG00000007570	Fance	-1.31169	2.25529e-13	17.41	20.16	7.26	8.21
ENSMUSG00000082045	Gm11585	-1.31122	1.39917e-06	46.41	37.74	18.37	16.11
ENSMUSG00000032606	Nicn1	-1.3111	8.23372e-12	13.48	12.96	5.27	5.58
ENSMUSG00000071230	Npw	-1.30476	0.362969	1.48	2.05	0.75	0.71
ENSMUSG00000019988	Nedd1	-1.30363	9.70067e-10	7.27	6.18	2.54	2.99
ENSMUSG00000041390	Mdfic	-1.30219	0.000213043	2.88	3.82	1.26	1.59
ENSMUSG00000032717	Mdfi	-1.30082	0.000630097	5.4	6.35	2.73	2.22
ENSMUSG00000112935	Gm40983	-1.29751	0.00251184	5.46	6.81	2.02	3.06
ENSMUSG00000082044	Snrpert	-1.2967	0.00670156	104.95	103.32	44.32	41.72
ENSMUSG00000038563	Efl1	-1.29358	7.38477e-15	11.15	10.8	4.94	4.18
ENSMUSG00000028381	Ugcg	-1.29235	3.99979e-18	11.54	11.44	4.67	4.88
ENSMUSG00000030980	Knop1	-1.29181	9.61938e-45	45.65	42.24	19.52	18.95
ENSMUSG00000047539	Fbxo28	-1.29178	1.86354e-14	6.89	7.36	2.88	3.05
ENSMUSG00000020935	Dcakd	-1.29153	1.40081e-37	107.03	120.12	45.64	48.85
ENSMUSG00000003549	Ercc1	-1.29117	4.85805e-11	20.93	23.67	9.59	9.44
ENSMUSG00000039069	Mtg2	-1.29073	4.32669e-06	10.37	10.76	4.57	4.15
ENSMUSG00000041360	Pum3	-1.28943	1.7182e-43	65.72	59.79	25.46	26.79
ENSMUSG00000028331	Trmo	-1.2891	9.74406e-08	12.15	11.96	4.86	5.19
ENSMUSG00000037997	Parp11	-1.28881	0.000380717	2.95	2.23	1.01	1.14
ENSMUSG00000004266	Ptpn6	-1.28625	1.25372e-15	26.69	25.5	12.51	9.29
ENSMUSG00000121300	Gm1070	-1.28367	0.00152006	2.31	2.16	1	0.87
ENSMUSG00000024423	Impact	-1.28172	2.10279e-16	17.1	13.46	6.14	6.64
ENSMUSG00000043019	Edem3	-1.28164	8.11799e-16	7.44	6.36	2.89	2.94
ENSMUSG00000060149	BC002059	-1.28079	0.00121974	3.59	3.21	1.26	1.58
ENSMUSG00000035914	Cd276	-1.28075	9.87916e-07	4.55	4.33	1.68	2.07
ENSMUSG00000029263	Pigg	-1.27807	0.000364674	2.18	2.2	0.68	1.05
ENSMUSG00000034777	Vax2	-1.27767	0.119849	1.84	1.7	0.88	0.61
ENSMUSG00000002458	Rgs19	-1.27719	6.78766e-13	28.32	28.58	12.25	12.15
ENSMUSG00000079737	Bfar	-1.276	0.000197551	5.27	5.59	2.35	2.22
ENSMUSG00000024180	Pgap6	-1.27575	1.15832e-23	20.96	22.36	9.24	9.64
ENSMUSG00000000339	Rtca	-1.27561	9.14595e-22	42.34	45.88	18.33	18.77
ENSMUSG00000073598	Smim33	-1.27474	0.0192613	1.54	1.56	0.72	0.58
ENSMUSG00000031629	Cenpu	-1.27443	7.05419e-11	10.69	9.45	3.79	4.68
ENSMUSG00000026785	Pkn3	-1.27232	2.89472e-09	7.43	6.82	2.8	3.21
ENSMUSG00000069539	Scyl2	-1.27192	8.88359e-15	10.12	9.27	4.34	3.77
ENSMUSG00000054967	Zfp647	-1.27191	0.000415643	3.53	3.81	1.59	1.56
ENSMUSG00000019792	Trmt11	-1.27119	7.04569e-08	8.4	7.53	3.13	3.58
ENSMUSG00000002846	Timmdc1	-1.26978	3.41643e-06	11.21	10.57	5.52	3.68
ENSMUSG00000031879	Ciao2b	-1.26925	3.78974e-19	84.35	79.36	37.17	31.98
ENSMUSG00000067713	Prkag1	-1.26818	4.16756e-24	51.04	48.62	21.96	20.14
ENSMUSG00000105987	AI506816	-1.26744	1.7014e-17	17.14	17.37	7.1	7.47
ENSMUSG00000071648	Rom1	-1.26731	0.00738618	3.68	3.36	1.37	1.6
ENSMUSG00000003379	Cd79a	-1.26664	0.0344223	2.17	2.91	1.2	0.95
ENSMUSG00000050891	Tatdn1	-1.26524	0.00709162	7.38	6.12	2.79	2.97
ENSMUSG00000089810	Gm16536	-1.26485	0.0183613	2.84	2.51	1.04	1.23
ENSMUSG00000021139	Gm20498	-1.26456	2.07357e-05	13.94	11.76	5.64	5.22
ENSMUSG00000090935	Synj2bp	-1.26253	1.23475e-10	7.81	6.28	3.81	3.29
ENSMUSG00000042195	Slc35f2	-1.25941	1.46526e-22	33.13	29.02	12.76	13.64
ENSMUSG00000036908	Unc93b1	-1.25545	0.00939291	2.05	2.39	0.92	0.98
ENSMUSG00000061024	Rrs1	-1.2546	6.68034e-42	92.15	92.42	40.31	38.44
ENSMUSG00000046204	Pnma2	-1.2527	2.32974e-09	3.81	4.16	1.82	1.62
ENSMUSG00000000317	Bcl6b	-1.24969	1.09626e-07	5.3	5.08	2.29	2.16
ENSMUSG00000028656	Cap1	-1.24825	5.55604e-54	116.97	113.78	48.75	49.08
ENSMUSG00000027075	Slc43a1	-1.24782	0.000260107	4.37	3.13	1.61	1.63
ENSMUSG00000050105	Fam110d	-1.24777	0.0907991	2.04	2.25	0.77	1.07
ENSMUSG00000052299	Ltn1	-1.24725	9.15936e-23	8.83	8.66	3.58	3.88
ENSMUSG00000070305	Mpzl3	-1.24583	0.00103952	2.16	1.97	0.93	0.84
ENSMUSG00000029048	Rer1	-1.24581	5.70157e-23	49.03	51.51	22.4	20.78
ENSMUSG00000106831	Ube2n-ps1	-1.24335	0.00077451	40.96	31.08	16.97	14.12
ENSMUSG00000057667	Bloc1s3	-1.24297	8.39445e-06	3.77	4.6	1.88	1.73
ENSMUSG00000028233	Tgs1	-1.24244	4.3801e-17	12.05	10.79	4.81	5.01
ENSMUSG00000018858	Mrpl58	-1.24238	1.42536e-14	37.16	38.89	15.35	18.04
ENSMUSG00000066798	Zbtb6	-1.2422	4.77233e-05	2.51	2.56	0.83	1.26
ENSMUSG00000025645	Ccdc51	-1.24111	6.78631e-05	7.13	7.62	3.18	3.17
ENSMUSG00000033543	Gtf2a2	-1.24035	7.68586e-12	49.63	49.7	18.92	23.86
ENSMUSG00000034453	Polr3b	-1.23891	4.15194e-28	18.78	18.63	7.84	8.3
ENSMUSG00000048537	Phldb1	-1.23855	7.17951e-15	12.39	12.16	5.97	4.47
ENSMUSG00000034471	Caskin2	-1.2385	4.68225e-13	7.48	8.15	3.73	3.02
ENSMUSG00000026873	Phf19	-1.23837	0.000128233	2.6	2.54	1	1.22
ENSMUSG00000030309	Caprin2	-1.23777	9.33924e-11	8.45	9.22	3.4	4.07
ENSMUSG00000074916	Chst14	-1.23756	0.0355169	1.64	1.71	0.82	0.62
ENSMUSG00000117924	Tmem223	-1.237	2.08624e-09	43.38	41.26	18.37	18.13
ENSMUSG00000027463	Slc52a3	-1.23545	5.36125e-08	8.95	7.67	3.32	3.86
ENSMUSG00000006235	Epor	-1.23511	0.0858297	1.39	1.45	0.65	0.58
ENSMUSG00000024683	Mrpl16	-1.23458	3.42366e-15	44.76	44.82	20.78	17.97
ENSMUSG00000027166	Dnajc24	-1.23254	5.63564e-06	13.4	13.58	6.49	5.21
ENSMUSG00000040618	Pck2	-1.23136	8.77656e-16	14.77	17.12	7.06	6.49
ENSMUSG00000063801	Ap3s2	-1.22968	1.23343e-28	17.61	17.74	7.31	8.04
ENSMUSG00000046947	Adck2	-1.2293	0.000584244	2.33	2.63	1.13	0.94
ENSMUSG00000034673	Pbx2	-1.2292	5.06298e-24	34.17	32.77	16.01	16.7
ENSMUSG00000047731	Wbp1l	-1.22831	1.53833e-26	23.93	22.65	10.41	9.85
ENSMUSG00000025161	Slc16a3	-1.22787	0.00565899	21.8	33.76	10.04	13.5
ENSMUSG00000041671	Pyroxd1	-1.22721	1.35371e-05	4.94	4.18	2.04	1.95
ENSMUSG00000079008	Gm14124	-1.22643	2.68854e-05	4.2	3.64	1.73	1.68
ENSMUSG00000086096	Gm12688	-1.22549	0.0845391	2.36	2.45	1.14	0.96
ENSMUSG00000037262	Kin	-1.22447	1.1809e-05	10.33	11.06	3.84	5.47
ENSMUSG00000092607	Scnm1	-1.22074	1.93045e-11	44	43.45	17.21	19.2
ENSMUSG00000025207	Sema4g	-1.22052	1.49823e-06	3.18	3.85	1.61	1.5
ENSMUSG00000040174	Alkbh3	-1.21867	0.000242426	8.32	8.5	3.56	3.71
ENSMUSG00000019312	Grb7	-1.2184	9.43391e-16	18.96	19.64	8.7	8.2
ENSMUSG00000038605	Samd10	-1.21755	0.000506763	3.98	3.88	1.7	1.74
ENSMUSG00000004054	Map3k11	-1.2154	1.35868e-15	11.57	11.39	5.29	4.78
ENSMUSG00000029265	Dr1	-1.21318	2.56638e-18	17.98	17.62	7.61	8.02
ENSMUSG00000035678	Tnfsf9	-1.20995	0.0185111	3.83	3.55	1.5	1.74
ENSMUSG00000078868	Gm14412	-1.20957	0.0525386	2.18	1.97	1	0.82
ENSMUSG00000032086	Bace1	-1.20937	1.24048e-05	1.99	2.15	0.91	0.87
ENSMUSG00000113911	Gm21930	-1.20921	0.020524	4.63	4.01	1.72	2.07
ENSMUSG00000027170	Eif3m	-1.20858	2.57812e-33	178.96	171.02	71.09	82.95
ENSMUSG00000032112	Trappc4	-1.20855	2.3335e-19	59.55	57.47	26.85	24.7
ENSMUSG00000028869	Gnl2	-1.20827	9.58095e-26	44.11	40.44	18.09	19.14
ENSMUSG00000019715	Gle1	-1.20813	5.04343e-26	23.16	21.77	9.87	9.93
ENSMUSG00000032288	Imp3	-1.20786	4.47853e-17	74.29	80.1	36.18	31.85
ENSMUSG00000022354	Ndufb9	-1.20616	4.91223e-22	168.96	162.42	77.76	68.19
ENSMUSG00000078713	Tomm5	-1.20616	6.02032e-26	253	254.85	103.1	120.3
ENSMUSG00000028409	Smu1	-1.20494	4.9833e-37	80.6	75.54	33.38	35.57
ENSMUSG00000087396	4933407K13Rik	-1.20257	0.00851322	1.67	1.45	0.82	0.56
ENSMUSG00000050029	Rap2c	-1.20066	2.48987e-09	7.97	7.56	2.97	3.9
ENSMUSG00000073838	Tufm	-1.20028	7.83196e-32	150.34	153.39	73.52	60.93
ENSMUSG00000062619	2310039H08Rik	-1.19877	0.0118952	8.04	9.32	3.51	4.19
ENSMUSG00000054414	Slc30a7	-1.19757	1.76374e-07	2.08	2.15	0.82	1.06
ENSMUSG00000032870	Smap2	-1.19568	1.16247e-10	11.61	13.66	6.31	4.94
ENSMUSG00000002881	Nab1	-1.19161	0.000214989	2.64	2.37	1.18	1.22
ENSMUSG00000096458	Moap1	-1.19129	9.91204e-05	9.79	9.05	3.99	4.45
ENSMUSG00000033862	Cdk10	-1.19077	5.61434e-17	35.06	38.79	16.04	16.88
ENSMUSG00000022752	Tomm70a	-1.18984	1.10598e-34	47.25	43.84	18.75	21.89
ENSMUSG00000121269	ENSMUSG00000121269	-1.18908	0.492405	4.04	6	2.26	2.23
ENSMUSG00000042729	Wdr74	-1.18906	1.2183e-29	111.17	110.59	49.45	49.78
ENSMUSG00000028668	Eloa	-1.18879	5.67371e-14	10.19	9.96	3.98	5.01
ENSMUSG00000042289	Hsd3b7	-1.18689	3.68924e-05	8.49	9.57	3.06	5.05
ENSMUSG00000049600	Zbtb45	-1.18656	3.25047e-20	29.15	30.31	13.66	12.38
ENSMUSG00000024841	Eif1ad	-1.18608	8.12543e-28	44.65	41.79	19.34	19.33
ENSMUSG00000002147	Stat6	-1.18578	6.75551e-13	9.41	9.56	4.31	4.18
ENSMUSG00000046792	Zfp787	-1.18521	1.92039e-07	13.64	16.54	8.09	7.25
ENSMUSG00000030310	Slc6a1	-1.1847	5.53997e-08	4.47	5.07	2.18	2.1
ENSMUSG00000022091	Sorbs3	-1.18323	0.0047743	2.3	1.89	0.89	0.98
ENSMUSG00000072772	Grcc10	-1.18188	2.90663e-25	140.74	149.53	66.29	63.98
ENSMUSG00000035637	Grhpr	-1.18024	2.83771e-19	69.44	79.49	31	35.9
ENSMUSG00000031388	Naa10	-1.17998	2.09824e-23	105.15	114.09	50.49	48.72
ENSMUSG00000038260	Trpm4	-1.17996	1.54433e-05	2.93	3.41	1.41	1.41
ENSMUSG00000041130	Zfp598	-1.17936	2.03833e-31	48.19	50.94	23.62	21.02
ENSMUSG00000025930	Msc	-1.17914	2.89773e-07	12.16	10.95	5.01	5.4
ENSMUSG00000031352	Hccs	-1.17864	2.45664e-08	10.12	9.65	4.05	4.78
ENSMUSG00000111128	Gm49338	-1.17749	0.0175828	2.46	2.13	0.9	1.19
ENSMUSG00000078905	Gm14393	-1.17582	0.123006	6.25	5.51	3.22	2.15
ENSMUSG00000020305	Asb3	-1.17571	0.000969038	3.19	2.4	1.33	1.84
ENSMUSG00000029911	Ssbp1	-1.17564	2.5077e-22	127.98	121.62	50.03	59.94
ENSMUSG00000020534	Shmt1	-1.17461	2.48368e-40	73.21	73.67	32.49	33.75
ENSMUSG00000030924	Rexo5	-1.17305	0.0147008	2.3	2.13	1.06	1.03
ENSMUSG00000048410	Zfp407	-1.17225	3.16699e-09	3.25	2.91	1.35	1.45
ENSMUSG00000026036	Nif3l1	-1.17215	3.43829e-19	25.34	24.45	10.69	9.89
ENSMUSG00000031505	Naxd	-1.17066	2.21826e-11	30.04	29	12.54	14.14
ENSMUSG00000030680	Pagr1a	-1.16935	0.577829	9.49	8.71	2.49	9.84
ENSMUSG00000038010	Ccdc138	-1.16726	0.00205794	3.42	2.93	1.21	1.66
ENSMUSG00000079469	Pigb	-1.16559	1.75631e-06	7.15	7.08	3.35	2.67
ENSMUSG00000042271	Nxt2	-1.16508	0.00136369	3.79	2.87	1.41	1.6
ENSMUSG00000042211	Fbxo38	-1.16384	3.18697e-22	18.5	17.68	8.24	8.2
ENSMUSG00000061111	Mcrip1	-1.16345	2.50785e-09	24.14	27.86	11.71	11.94
ENSMUSG00000015189	Casd1	-1.16329	5.30227e-06	5.08	4.87	1.59	3
ENSMUSG00000035266	Helq	-1.16283	2.40551e-11	8.56	8.82	4.06	3.84
ENSMUSG00000052698	Tln2	-1.16271	3.43581e-14	5.51	5.52	2.21	2.94
ENSMUSG00000021266	Wars1	-1.16156	7.17986e-31	52.38	53.21	25.13	23.57
ENSMUSG00000042694	Stn1	-1.16151	9.08291e-08	11.32	11.15	4.99	4.77
ENSMUSG00000030610	Det1	-1.16031	3.72966e-05	5.64	5.89	2.56	2.66
ENSMUSG00000020346	Mgat1	-1.15973	2.92762e-09	10.36	12	5.67	4.54
ENSMUSG00000028917	Plekhm2	-1.1594	2.4425e-06	3.81	4.58	1.72	2.1
ENSMUSG00000030738	Eif3c	-1.15907	2.04109e-59	182.86	180.14	82.47	83.03
ENSMUSG00000020788	Atp2a3	-1.15893	3.90593e-17	12.68	14.12	5.79	6.45
ENSMUSG00000069011	Gm10254	-1.15804	0.102407	3.43	4.05	2.08	1.35
ENSMUSG00000116715	Gm40881	-1.157	0.269481	3.51	2.07	0.27	2.26
ENSMUSG00000028069	Gpatch4	-1.1565	6.97062e-23	58.51	55.42	25.08	26.72
ENSMUSG00000026142	Rhbdd1	-1.15629	0.000836393	2.3	2.33	1.16	0.95
ENSMUSG00000025135	Anapc11	-1.15547	2.95292e-22	100.07	93.77	42.97	38.54
ENSMUSG00000034401	Spata6	-1.15523	0.000116679	4.92	4.61	2.39	1.94
ENSMUSG00000029152	Ociad1	-1.15494	2.10523e-25	81.68	83.35	35.71	38.03
ENSMUSG00000071180	Smim15	-1.15423	2.56359e-15	30.86	28.06	14.07	13.09
ENSMUSG00000047090	Tmem198b	-1.15356	0.000370732	4.11	5.07	2.36	1.86
ENSMUSG00000063646	Jakmip1	-1.15255	1.39795e-06	7.08	7.59	3.29	3.44
ENSMUSG00000018559	Ctdnep1	-1.15237	1.52476e-15	34.01	33.48	16.12	14.78
ENSMUSG00000008763	Man1a2	-1.15124	5.89774e-12	5.3	4.39	2.22	2.21
ENSMUSG00000053769	Lysmd1	-1.15122	0.000316515	4.13	4.17	1.82	2
ENSMUSG00000026775	Yme1l1	-1.15111	7.18584e-26	40.31	35.27	15.98	18.65
ENSMUSG00000022546	Gpt	-1.14961	0.00766525	4.92	5.17	2.83	2.12
ENSMUSG00000113836	Gm3325	-1.14748	0.000159772	4.14	3.98	1.7	2.02
ENSMUSG00000048528	Nkx1-2	-1.14745	2.77896e-10	10.26	13.32	5.21	5.64
ENSMUSG00000002059	Rab34	-1.14519	9.24202e-07	13.16	15.36	7.31	6.95
ENSMUSG00000040843	Tiprl	-1.14428	7.12999e-14	10.92	9.84	5	4.56
ENSMUSG00000049717	Lig4	-1.14423	3.40455e-08	4.65	4.25	2.36	2.22
ENSMUSG00000006941	Eif1b	-1.14395	1.34052e-05	16.26	16.51	7.75	7.34
ENSMUSG00000030284	Creld1	-1.14263	1.16908e-16	24.76	27.18	11.9	12.07
ENSMUSG00000062846	Gm14176	-1.14217	0.381342	3.66	3.66	1.92	1.52
ENSMUSG00000022972	Cfap298	-1.14212	2.42606e-12	30.31	30.94	13.21	15.08
ENSMUSG00000051469	Zfp24	-1.1416	7.78252e-12	8.13	9.19	4.08	4.34
ENSMUSG00000089782	Btf3-ps1	-1.1408	0.083181	9.75	12.16	5.56	4.53
ENSMUSG00000079109	Pms2	-1.14048	1.42563e-11	6.54	6.43	2.86	3.15
ENSMUSG00000071647	Eml3	-1.1401	9.21371e-13	13.86	15.05	7.37	6.19
ENSMUSG00000002345	Borcs8	-1.13775	7.93659e-07	30.61	34.51	15.52	13.56
ENSMUSG00000029918	Mrps33	-1.13737	1.47453e-17	78.65	76.3	33.2	34.86
ENSMUSG00000029147	Ppm1g	-1.13699	5.96911e-52	206.55	211.01	94.92	96.58
ENSMUSG00000022043	Trim35	-1.13679	4.57041e-29	33.65	33.29	15.31	15.68
ENSMUSG00000050213	Snip1	-1.13521	8.81136e-13	18.13	21.35	9.13	9.18
ENSMUSG00000040699	Limd2	-1.13516	7.68279e-08	10.68	7.47	4.12	4.12
ENSMUSG00000021611	Tert	-1.13337	3.26093e-07	4.63	4.6	2.34	1.95
ENSMUSG00000032570	Atp2c1	-1.13335	4.55881e-20	18.8	20.06	8.96	10.05
ENSMUSG00000022554	Hgh1	-1.13114	1.04477e-12	20.92	23.57	10.28	10.42
ENSMUSG00000031400	G6pdx	-1.1286	8.42756e-23	34.05	35.57	15.79	16.63
ENSMUSG00000024981	Acsl5	-1.12805	0.000268379	2.56	2.29	1.22	1.04
ENSMUSG00000047824	Pygo2	-1.12804	2.69718e-21	28.51	32.5	14.01	14.87
ENSMUSG00000032946	Rasgrp2	-1.1268	2.57145e-10	36.08	38.02	17.83	19.85
ENSMUSG00000092390	Gm20541	-1.12389	0.0557679	2.9	2.87	1.75	0.95
ENSMUSG00000021484	Lman2	-1.12326	2.09261e-35	44.12	42.27	20.03	20.34
ENSMUSG00000070473	Cldn3	-1.123	0.0214494	4.12	4.26	2.18	1.74
ENSMUSG00000074832	Zfp998	-1.12047	0.00517409	8.59	5.82	4.09	3.63
ENSMUSG00000074210	E130208F15Rik	-1.11715	0.00331174	4.06	5.81	2.57	2.11
ENSMUSG00000020308	Tpgs1	-1.11593	1.00249e-11	41.76	41.34	20.7	18.22
ENSMUSG00000020527	Myo19	-1.11478	2.15715e-14	12.08	12.99	6.21	5.98
ENSMUSG00000053565	Eif3k	-1.11449	1.73973e-43	558.32	580.19	265.89	266.29
ENSMUSG00000019823	Mical1	-1.11415	4.27416e-08	6.32	7.05	3.03	3.26
ENSMUSG00000063019	Manbal	-1.11369	1.63364e-14	54.62	51.63	25.63	24.31
ENSMUSG00000038762	Abcf1	-1.1135	4.6902e-43	120.59	125.43	55.81	59.96
ENSMUSG00000032806	Slc10a3	-1.11317	0.0034686	3.84	4.42	2.3	1.64
ENSMUSG00000040356	Skiv2l	-1.11308	6.39852e-20	24.33	25.88	12.88	10.77
ENSMUSG00000024081	Cebpz	-1.113	9.72832e-27	40.75	36.47	17.31	19.01
ENSMUSG00000072761	Gm6712	-1.11288	0.031295	2.99	2.13	0.73	1.67
ENSMUSG00000024212	Mllt1	-1.11249	1.54355e-15	15.65	17.02	8.19	7.21
ENSMUSG00000007050	Lsm2	-1.11236	6.32145e-21	123.96	128.27	59.54	58.16
ENSMUSG00000028391	Wdr31	-1.11218	2.74174e-05	10.19	10.33	4.04	5.11
ENSMUSG00000021548	Ccnh	-1.11216	1.25331e-09	21.8	19.64	7.89	10.79
ENSMUSG00000084786	Ubl5	-1.11154	4.19116e-19	256.34	244.58	102.61	115.96
ENSMUSG00000049502	Dtx3l	-1.11134	1.29557e-05	3.15	3.13	1.2	1.65
ENSMUSG00000054237	Fra10ac1	-1.11093	0.000371786	7.95	10.23	3.77	4.8
ENSMUSG00000023009	Nckap5l	-1.11085	4.05567e-06	4.4	4.69	2.62	1.67
ENSMUSG00000059897	Zfp930	-1.11037	1.8501e-08	8.56	10.42	5.69	5.41
ENSMUSG00000038390	Gpr162	-1.11027	0.0116902	1.85	2.32	0.99	0.99
ENSMUSG00000043311	D17H6S53E	-1.10884	0.0611326	1.41	1.85	0.7	0.84
ENSMUSG00000031107	Rbmx2	-1.10868	1.61021e-06	12.94	10.68	5.62	5.52
ENSMUSG00000028232	Tmem68	-1.10857	0.00196162	3.26	2.76	1.4	1.43
ENSMUSG00000020427	Igfbp3	-1.10684	0.000260989	4.96	4.75	2.38	2.06
ENSMUSG00000054509	Parp4	-1.10618	0.00509001	1.58	1.49	0.43	1.01
ENSMUSG00000024608	Rps14	-1.10616	1.75685e-61	4345.96	4286.06	2026.77	1972.44
ENSMUSG00000037446	Tulp1	-1.10521	0.16039	1.22	1.7	0.56	0.79
ENSMUSG00000023277	Twf2	-1.10485	1.72237e-13	32.64	33.1	14.47	16.63
ENSMUSG00000032557	Uba5	-1.10432	2.98803e-16	27.76	25.8	13.35	12
ENSMUSG00000037343	Taf2	-1.10398	2.84324e-16	16.7	15.17	6.73	8.35
ENSMUSG00000026784	Pdss1	-1.10396	2.75792e-08	18.23	17.72	7.51	9.48
ENSMUSG00000040811	Eml2	-1.10341	5.14589e-18	29.94	30.54	14.62	14.01
ENSMUSG00000074867	Zfp808	-1.10293	3.02502e-05	7.52	6.86	2.7	4.26
ENSMUSG00000029480	Dhx37	-1.10272	1.12815e-23	20.47	21.87	10.13	9.95
ENSMUSG00000090996	Gm20458	-1.10227	0.166884	1.97	2.3	1.59	0.48
ENSMUSG00000069306	H4c17	-1.10222	0.45743	5.37	3.44	2.08	2.34
ENSMUSG00000078881	Gm14434	-1.10109	0.1742	1.36	1.63	0.74	0.68
ENSMUSG00000030138	Bms1	-1.10063	8.39057e-41	66	63.83	31.4	30.24
ENSMUSG00000096935	1700113A16Rik	-1.0994	0.18551	2.37	2.67	1	1.31
ENSMUSG00000021840	Mapk1ip1l	-1.0993	2.73653e-34	52.22	49.72	23.17	25.28
ENSMUSG00000003346	Abhd17a	-1.09872	8.48352e-22	68.48	73.42	34.36	33.12
ENSMUSG00000039182	AW209491	-1.09794	1.10469e-06	9.16	9.11	4.05	5.6
ENSMUSG00000020905	Usp43	-1.09588	0.0116894	1.13	1.75	0.78	0.59
ENSMUSG00000078300	Gm2606	-1.09486	0.212072	1.95	2.4	1.26	0.81
ENSMUSG00000078908	Mon1b	-1.09451	1.30293e-08	6.27	6.2	3.5	2.7
ENSMUSG00000032534	Cep63	-1.0944	6.73323e-08	7.22	6.53	3.72	3.67
ENSMUSG00000053137	Mapk11	-1.0927	0.00268655	2.95	3.49	1.52	1.56
ENSMUSG00000024352	Spata24	-1.09222	0.0501582	7.18	7.42	3.57	3.4
ENSMUSG00000021916	Glt8d1	-1.09191	0.00108547	6.58	6.02	2.36	2.84
ENSMUSG00000021645	Smn1	-1.09111	2.03144e-18	70.5	65.91	32.14	32.98
ENSMUSG00000039826	Trub2	-1.08901	6.9734e-19	26.09	27.18	12.89	11.52
ENSMUSG00000001588	Acap1	-1.0882	8.75438e-06	6.36	7.1	3.12	3.33
ENSMUSG00000032586	Traip	-1.0879	3.61251e-05	5.15	5.54	2.36	2.76
ENSMUSG00000023947	Nfkbie	-1.08753	0.0161444	2.29	2.27	0.9	1.28
ENSMUSG00000070319	Eif3g	-1.08712	3.45614e-40	293.58	294.75	141.08	140.66
ENSMUSG00000070371	Prss36	-1.08709	0.0202704	4.32	3.61	1.18	1.97
ENSMUSG00000022519	Srl	-1.08647	1.9002e-09	7.68	8.68	3.93	3.89
ENSMUSG00000025607	Copg2	-1.08642	2.25748e-16	23.1	23.83	9.85	12.65
ENSMUSG00000037646	Vps13b	-1.08334	5.43694e-09	2	2.15	0.91	1.09
ENSMUSG00000038517	Tbkbp1	-1.08214	9.56796e-05	3.73	4.09	1.91	1.85
ENSMUSG00000067942	Zfp160	-1.08138	0.000138633	4.91	5.05	2.23	2.2
ENSMUSG00000043866	Taf10	-1.08066	4.32282e-18	18.58	20.91	10.02	9.02
ENSMUSG00000030431	Tmem238	-1.08031	0.00027911	9.1	13.34	5.82	5.01
ENSMUSG00000052593	Adam17	-1.07955	1.92846e-15	13.43	12.31	6.24	6.16
ENSMUSG00000018209	Stk4	-1.07942	8.99917e-22	19.6	17.61	9.14	8.83
ENSMUSG00000026707	Nsun6	-1.07885	0.0122736	2.33	2.01	0.77	1.27
ENSMUSG00000028478	Clta	-1.07882	8.4561e-36	338.15	332.74	169.22	153.11
ENSMUSG00000006471	Ndor1	-1.07875	2.73762e-13	15.41	16.11	7.75	8.1
ENSMUSG00000020381	Mrnip	-1.07842	0.00274172	9.05	10.23	5.81	3.56
ENSMUSG00000030498	Gas2	-1.07759	0.0905834	1.41	1.65	0.64	0.81
ENSMUSG00000021835	Bmp4	-1.0775	2.15866e-10	20.29	18.01	9.88	8.59
ENSMUSG00000052917	Senp7	-1.07697	0.106476	1.85	1.98	1	0.77
ENSMUSG00000046179	E2f8	-1.07662	5.14337e-13	13.35	14.83	6.41	7.21
ENSMUSG00000015126	Tsr3	-1.07614	1.50766e-09	29.25	30.48	14.64	14.2
ENSMUSG00000030301	Ccdc91	-1.07527	0.000623072	5.11	4.21	2.6	1.91
ENSMUSG00000113749	Mrto4-ps1	-1.07501	0.348721	2.78	1.83	0.86	1.43
ENSMUSG00000061374	Fiz1	-1.07401	4.50299e-25	60.03	62.14	31.89	27.8
ENSMUSG00000035790	Cep19	-1.07287	7.54714e-06	11.38	11.28	5.24	5.61
ENSMUSG00000024429	Gnl1	-1.0721	9.21855e-27	46.1	45.95	22.67	21.92
ENSMUSG00000025616	Usp16	-1.07198	3.39098e-10	12.72	10.86	5.34	5.88
ENSMUSG00000024906	Mus81	-1.07175	2.5936e-06	10.03	9.26	5.01	4.33
ENSMUSG00000043929	Klhl15	-1.07068	0.0837958	1.62	1.61	0.61	0.82
ENSMUSG00000035069	Oma1	-1.07059	2.35373e-06	11.53	10.02	4.94	5.49
ENSMUSG00000032446	Eomes	-1.0687	8.03986e-11	12.13	12.25	5.27	6.53
ENSMUSG00000023286	Ube2j2	-1.06855	6.04095e-24	61.52	61.69	28.1	33
ENSMUSG00000068250	Amn1	-1.06837	0.117077	2.21	1.8	1	0.98
ENSMUSG00000063785	Utp14a	-1.06721	2.00809e-18	34.99	34.19	15.65	17.94
ENSMUSG00000006395	Hyi	-1.06699	0.411443	1.5	1.5	0.17	1.28
ENSMUSG00000086228	Ubap1l	-1.06685	0.119622	1.66	3.02	0.97	1.31
ENSMUSG00000041263	Rusc1	-1.06672	0.000313504	5.91	5.84	3.08	2.35
ENSMUSG00000121489	1810014B01Rik	-1.06659	0.122363	1.82	1.42	0.93	0.68
ENSMUSG00000024258	Polr2d	-1.06603	2.07347e-19	111.63	103.89	50.04	53.84
ENSMUSG00000000811	Txnrd3	-1.06594	1.18031e-05	6.21	5.64	2.69	3.06
ENSMUSG00000024856	Cdk2ap2	-1.06558	2.07035e-09	38.92	38.63	21.9	18.63
ENSMUSG00000095026	Gm3336	-1.06536	0.0498759	6.93	5.19	2.09	3.92
ENSMUSG00000034758	Tle6	-1.06388	0.00101074	5.37	5.18	2.18	2.9
ENSMUSG00000020691	Mettl2	-1.06384	1.32342e-12	28.04	26.05	12.44	13.87
ENSMUSG00000034748	Sirt6	-1.06375	4.0155e-13	26.88	27.8	13.47	13.07
ENSMUSG00000002105	Slc39a13	-1.06067	0.00593562	3.78	3.34	2.73	1.66
ENSMUSG00000035372	1810055G02Rik	-1.06067	4.46603e-11	22.83	25.87	12.73	11.01
ENSMUSG00000068964	Gm6361	-1.06006	0.507847	87.48	58.32	58.81	11.5
ENSMUSG00000006058	Snf8	-1.05867	2.29586e-14	66.8	71.06	34.7	33.76
ENSMUSG00000021428	Riok1	-1.058	1.33293e-11	17.45	15.38	7.69	8.35
ENSMUSG00000062210	Tnfaip8	-1.05678	0.00337871	6.1	6.84	3.51	2.32
ENSMUSG00000041703	Zic5	-1.05645	1.44071e-07	4.75	4.94	2.3	2.45
ENSMUSG00000035139	Secisbp2	-1.05416	4.08638e-11	12.24	11.77	6.23	5.69
ENSMUSG00000000776	Polr3d	-1.0521	1.76269e-14	40.12	38.55	21.48	17.11
ENSMUSG00000032328	Tmem30a	-1.04979	2.77288e-11	11.94	10.64	5.59	5.52
ENSMUSG00000074736	Syndig1	-1.04962	0.086736	1.48	1.77	0.93	0.67
ENSMUSG00000028430	Nol6	-1.04824	2.05807e-33	57.8	60.14	30.34	27.75
ENSMUSG00000097772	5430416N02Rik	-1.04802	4.78752e-07	16.58	18.26	9.04	8.65
ENSMUSG00000040365	Trim41	-1.04792	3.13947e-21	31.03	29.7	15.64	14.27
ENSMUSG00000040525	Cblc	-1.04781	0.00145218	6.08	6.44	3.49	2.67
ENSMUSG00000063838	Cdc42ep5	-1.04656	0.000806443	11.4	14.06	5.83	6.73
ENSMUSG00000071649	B3gat3	-1.04556	9.44171e-08	17.9	18.31	8.1	9.75
ENSMUSG00000041189	Chrnb1	-1.04528	0.0983758	1.73	1.72	1.22	0.49
ENSMUSG00000044715	Gskip	-1.04473	0.0039192	5.11	4.83	3.54	3.18
ENSMUSG00000037119	Fam91a1	-1.04466	1.27176e-15	15.3	13.3	6.57	7.54
ENSMUSG00000024349	Sting1	-1.0441	0.000126303	5.77	6.23	3.05	2.8
ENSMUSG00000034209	Rasl10a	-1.04403	0.317668	1.19	1.58	0.54	0.83
ENSMUSG00000026254	Eif4e2	-1.04383	1.25764e-33	164.88	157.23	88.33	88.14
ENSMUSG00000030041	M1ap	-1.04019	1.86651e-06	14.04	12.3	7.49	5.58
ENSMUSG00000027189	Trim44	-1.04016	5.3444e-21	16.53	17.04	8.12	8.5
ENSMUSG00000042148	Cox10	-1.03972	1.98433e-10	12.82	13.92	6.96	6.29
ENSMUSG00000027194	Ttc17	-1.03893	9.86672e-08	6.72	7.65	3.86	3.33
ENSMUSG00000029840	Mtpn	-1.03731	2.45588e-27	43.79	40.34	21.07	20.65
ENSMUSG00000062054	Iah1	-1.0371	1.32076e-06	22.8	20.83	11.43	10.02
ENSMUSG00000038416	Cdc16	-1.03671	4.67552e-26	73.75	68.16	34.29	36.09
ENSMUSG00000092454	Gm2991	-1.03591	0.0416072	25.62	15.1	11.55	8.46
ENSMUSG00000071267	Zfp942	-1.03557	0.002912	2.67	2.43	1.17	1.44
ENSMUSG00000012429	Mplkip	-1.03522	5.19689e-05	6.73	6.81	3.04	2.8
ENSMUSG00000039166	Akap7	-1.03393	0.000205642	6.38	5.89	2.63	3.42
ENSMUSG00000024118	Tedc2	-1.03382	3.80646e-07	10.73	11.29	5.45	5.51
ENSMUSG00000095865	Gm13237	-1.03147	0.462085	2.46	1.57	0.86	1.23
ENSMUSG00000071302	2610044O15Rik8	-1.03088	0.00019301	7.63	6.79	2.93	3.74
ENSMUSG00000074211	Sdhaf1	-1.03044	0.0048786	2.96	3.27	1.56	1.56
ENSMUSG00000039917	Rhbdd2	-1.0303	1.06539e-08	6.74	7.33	3.43	3.59
ENSMUSG00000047030	Spata2	-1.02995	6.7622e-12	11.32	12.64	6.28	5.69
ENSMUSG00000029469	Ift81	-1.02848	0.0097766	2.33	2.09	1.07	1.13
ENSMUSG00000093575	Gm20695	-1.02783	0.286001	1.23	3.26	1.53	0.77
ENSMUSG00000030269	Mtmr14	-1.02766	1.99629e-21	39.89	38.89	19.2	20.14
ENSMUSG00000118537	Shld3	-1.02754	0.0111767	5.43	4.93	1.84	3.31
ENSMUSG00000033031	Cip2a	-1.02698	8.63919e-16	28.39	24.1	11.99	14.21
ENSMUSG00000019054	Fis1	-1.02396	1.83073e-14	109.43	103.16	54.16	48.89
ENSMUSG00000018727	Cpsf4l	-1.02321	0.00726154	6.57	6.11	2.96	3.36
ENSMUSG00000021235	Coq6	-1.02179	4.01256e-08	24.93	25.35	14.6	10.56
ENSMUSG00000005503	Evx1	-1.02154	0.0401532	1.88	1.44	0.75	0.87
ENSMUSG00000024983	Vti1a	-1.02097	0.00312936	4.72	3.85	3.15	2.09
ENSMUSG00000029433	Diablo	-1.02055	6.19363e-15	43.01	42.99	21.49	22.64
ENSMUSG00000034449	Dhrs11	-1.02028	0.00757727	7.59	5.87	3.52	3.22
ENSMUSG00000032295	Man2c1	-1.02009	6.69608e-12	12.73	14.54	7.25	6.47
ENSMUSG00000042505	Sdhaf3	-1.0198	0.000711997	2.34	2.5	1.25	1.18
ENSMUSG00000003923	Tfam	-1.01907	1.81167e-19	26.49	28.01	14.59	14.63
ENSMUSG00000020088	Sar1a	-1.01883	7.11884e-24	53.4	51.46	25.4	27.27
ENSMUSG00000026031	Cflar	-1.01836	0.0132785	1.58	1.52	0.5	0.91
ENSMUSG00000060671	Atp8b2	-1.01765	4.08019e-21	17.76	18.59	8.98	9.39
ENSMUSG00000018322	Tomm34	-1.0155	9.99883e-13	28.08	29.69	14.79	13.69
ENSMUSG00000109523	Gdf1	-1.01402	0.19562	2.19	1.43	0.95	0.85
ENSMUSG00000022101	Fgf17	-1.01372	4.3738e-07	16.57	18.92	8.13	9.39
ENSMUSG00000030660	Pik3c2a	-1.0137	6.01405e-05	2.34	2.32	0.94	1.42
ENSMUSG00000025474	Tubgcp2	-1.01344	1.58526e-12	21.72	20.35	11.68	9.54
ENSMUSG00000037681	Esyt3	-1.0129	0.00129707	2.33	2.06	1.05	1.17
ENSMUSG00000048027	Rgmb	-1.01169	0.00774503	1.27	1.55	0.82	0.53
ENSMUSG00000061755	Bod1l	-1.01167	1.1648e-10	4.22	4.97	2.14	2.51
ENSMUSG00000002741	Ykt6	-1.0104	8.0028e-26	64.82	60.75	31.64	31.8
ENSMUSG00000034343	Ube2f	-1.00983	5.44333e-10	27.6	27.38	13.82	14.42
ENSMUSG00000050174	Nudt6	-1.00974	0.263692	1.94	1.63	0.71	1.07
ENSMUSG00000095990	Zfp97	-1.0094	0.000113925	6.73	6.41	2.67	3.98
ENSMUSG00000020472	Zkscan17	-1.00937	2.84099e-16	17.51	18.34	8.92	9.14
ENSMUSG00000034163	Zfc3h1	-1.00898	7.48411e-08	4.3	3.68	2.02	2.01
ENSMUSG00000078919	Dpm1	-1.00876	0.186603	1.58	2	0.55	1.35
ENSMUSG00000120624	ENSMUSG00000120624	-1.00795	0.539553	2.56	3.63	1.59	1.54
ENSMUSG00002076896	Gm55431	-1.00625	0.371512	304.29	203.11	164.33	101.07
ENSMUSG00000006050	Sra1	-1.00612	1.34522e-10	22.73	21.25	10.7	11.58
ENSMUSG00000031358	Msl3	-1.0046	0.0242788	2.86	2.12	1.34	1.19
ENSMUSG00000027242	Wdr76	-1.00402	1.3545e-10	11.41	10.53	5.23	5.72
ENSMUSG00000006649	Nphs1	-1.00353	1.57777e-05	3.58	4.12	2.01	1.9
ENSMUSG00000026618	Iars2	-1.00326	1.42467e-19	20.66	21.12	10.53	11.27
ENSMUSG00000008859	Rala	-1.00282	1.31879e-10	16.48	15.01	7.87	8.11
ENSMUSG00000039850	Endov	-1.00217	0.000277952	4.79	5.37	2.63	2.43
ENSMUSG00000045205	Dpy19l4	-1.00171	7.92741e-05	2.47	2.25	1.03	1.37
ENSMUSG00000060803	Gstp1	-1.00171	4.41066e-11	68.3	71.59	34.85	36.25
ENSMUSG00000020549	Elac2	-1.00155	1.27207e-22	42.26	42.51	21.98	21.06
ENSMUSG00000022339	Ebag9	-1.00093	0.000554766	7.93	6.2	3.37	3.43
ENSMUSG00000033669	Zfp7	-0.999371	1.72334e-15	27.16	24.79	14.38	14.08
ENSMUSG00000036061	Smug1	-0.999359	8.97206e-07	6.76	6.13	3.23	3.3
ENSMUSG00000042087	4933440N22Rik	-0.998661	0.000428989	6.92	6.57	3.81	3.11
ENSMUSG00000121075	ENSMUSG00000121075	-0.998422	0.352665	1.93	1.98	0.61	1.42
ENSMUSG00000059920	4930453N24Rik	-0.997234	9.7582e-11	8.06	7.21	3.93	3.85
ENSMUSG00000002844	Adprh	-0.995722	4.8605e-22	61.08	58.11	32.78	28.08
ENSMUSG00000058997	Vwa8	-0.994828	7.53951e-05	2.4	2.44	1.2	1.21
ENSMUSG00000086147	Zfp989	-0.994489	8.90692e-07	13.52	10.83	5.92	6.54
ENSMUSG00000004264	Phb2	-0.994357	7.44743e-44	525.34	521.62	263.74	271.01
ENSMUSG00000025047	Pdcd11	-0.993454	4.66685e-31	34.89	36.66	17.93	18.68
ENSMUSG00000006390	Elovl1	-0.992095	6.35632e-07	16.31	17.19	9.32	8.01
ENSMUSG00000059555	Tor4a	-0.992041	0.00152377	3.46	3.08	1.89	1.45
ENSMUSG00000028708	Mknk1	-0.991897	2.27826e-05	8.32	7.56	4.63	3.5
ENSMUSG00000029034	Ints11	-0.991786	1.40698e-18	42.1	44.12	21.1	23.06
ENSMUSG00000022865	Cxadr	-0.991519	2.52502e-05	3.48	3.91	1.47	1.73
ENSMUSG00000030056	Isy1	-0.991297	5.09022e-20	24.83	23.6	11.41	13.39
ENSMUSG00000042790	Rnf214	-0.990956	1.28469e-05	6.29	6.97	3.3	3.13
ENSMUSG00000069814	Ccdc92b	-0.989627	5.32158e-05	4.48	4.88	2.81	1.99
ENSMUSG00000003271	Sult2b1	-0.989322	0.21521	2.14	1.73	0.86	1.13
ENSMUSG00000003198	Zfp959	-0.989269	0.0837445	1.92	1.9	0.75	1.2
ENSMUSG00000096696	Zfp960	-0.989142	0.000342615	6.51	4.99	2.57	3.3
ENSMUSG00000051243	Islr2	-0.988151	1.35995e-06	6.05	5.43	2.85	2.94
ENSMUSG00000040957	Cables1	-0.988036	0.013172	1.86	2.25	0.9	1.23
ENSMUSG00000022429	Dmc1	-0.987447	0.0121323	3.88	3.55	1.42	2.14
ENSMUSG00000020003	Pex7	-0.986771	1.29476e-07	19	15.94	9.98	9.21
ENSMUSG00000002731	Prkra	-0.985707	0.000933794	7.38	8.47	4.55	3.61
ENSMUSG00000079605	Zbtb9	-0.985428	1.76867e-06	8	8.04	4.03	4.25
ENSMUSG00000087207	Gm13147	-0.985257	0.128946	3.46	2.41	1.48	1.56
ENSMUSG00000113081	Gm3333	-0.984777	0.364874	4.3	2.86	1.08	2.97
ENSMUSG00000021710	Nln	-0.984537	4.23986e-10	10.05	10.86	5.2	5.86
ENSMUSG00000050079	Rspry1	-0.983633	2.48043e-07	8.82	6.97	3.94	3.94
ENSMUSG00000025732	Mcrip2	-0.981256	0.00524886	11.96	18.04	7.24	8.17
ENSMUSG00000020085	Aifm2	-0.980839	1.20519e-05	9.85	9.16	5.58	4.81
ENSMUSG00000040621	Gemin8	-0.980189	0.0159847	5.23	3.39	1.76	2.71
ENSMUSG00000033972	Zfp944	-0.979469	0.0220648	2.26	2.01	1.24	0.97
ENSMUSG00000002768	Mea1	-0.978426	6.2717e-12	72.53	68.79	36.6	37.82
ENSMUSG00000049728	Zfp668	-0.978316	8.94522e-07	6.69	7.77	3.86	3.83
ENSMUSG00000034820	Cpsf7	-0.978277	3.30692e-19	31.91	29.78	16.46	15.47
ENSMUSG00000068551	Zfp467	-0.976772	0.0460366	3.04	2.65	1.69	2.17
ENSMUSG00000030330	Ing4	-0.976365	9.70067e-10	28.31	26.19	15.47	13.65
ENSMUSG00000022369	Mtbp	-0.975954	8.33026e-08	13.15	10.24	5.75	6.32
ENSMUSG00000045763	Basp1	-0.973834	1.51603e-20	79.5	72.05	38.11	40.39
ENSMUSG00000022475	Hdac7	-0.973453	0.00327362	2.08	2.28	1.15	1.23
ENSMUSG00000069020	Urm1	-0.973127	8.54044e-17	51.91	46.55	26.97	24.08
ENSMUSG00000009585	Apobec3	-0.972527	1.26879e-12	39.89	41.58	18.98	23.92
ENSMUSG00000036281	Snapc4	-0.972245	1.4847e-09	12.88	13.8	8.02	5.85
ENSMUSG00000041974	Spidr	-0.972215	8.05103e-10	12.35	12.4	6.04	6.82
ENSMUSG00000039148	Sart1	-0.970339	3.91067e-27	42.91	40.8	22.56	20.97
ENSMUSG00000073427	Gm4924	-0.970274	0.0110269	3.94	3.63	2.25	2.3
ENSMUSG00000031654	Cbln1	-0.969543	0.0428083	2.23	3.6	1.28	1.88
ENSMUSG00000045071	E130308A19Rik	-0.968256	8.41643e-06	2.42	2.95	1.14	1.48
ENSMUSG00000075227	Znhit2	-0.967792	1.80288e-05	17.55	16.05	8.51	8.95
ENSMUSG00000067714	Lpar5	-0.966848	0.000955236	8.66	9.86	4.72	4.93
ENSMUSG00000030697	Ppp4c	-0.965679	1.06647e-30	221.67	223.71	118.86	112.51
ENSMUSG00000003581	Rnf215	-0.965625	0.0044569	4.76	4.95	2.57	2.49
ENSMUSG00000027774	Gfm1	-0.965517	2.70154e-19	25.81	24.84	13.5	12.91
ENSMUSG00000035351	Nup37	-0.96507	4.95596e-12	53.3	48.04	25.5	27.29
ENSMUSG00000114133	Btf3l4b	-0.964732	0.124974	1.36	1.64	0.65	0.93
ENSMUSG00000038916	Soga3	-0.963204	0.00145896	2.65	2.44	1.28	1.37
ENSMUSG00000028010	Gar1	-0.963166	2.42329e-18	93.07	92.1	50.41	46.26
ENSMUSG00000049960	Mrps16	-0.962545	2.41116e-11	20.54	23.69	11.19	11.93
ENSMUSG00000022221	Ripk3	-0.962455	1.26897e-07	16.21	17.12	9.19	8.23
ENSMUSG00000033918	Parl	-0.961021	7.20444e-22	114.65	108.85	57.38	59.41
ENSMUSG00000045045	Lrfn4	-0.960935	5.4098e-09	11.93	13.77	6.81	6.6
ENSMUSG00000029629	Phf14	-0.960895	7.04087e-12	24.96	23.82	10.91	14.24
ENSMUSG00000033416	Gucd1	-0.95994	2.7218e-05	6.07	5.6	3.37	2.78
ENSMUSG00000005034	Prkacb	-0.959265	3.10808e-08	7.32	6.98	3.74	3.83
ENSMUSG00000055319	Sec23ip	-0.958635	3.37817e-16	19.23	18.18	9.4	10.19
ENSMUSG00000022476	Polr3h	-0.957782	1.47346e-12	23.36	22.06	12.92	11.76
ENSMUSG00000037640	Zfp60	-0.956977	0.000738574	2.56	2.25	1.13	1.53
ENSMUSG00000006720	Zfp184	-0.956638	0.000815183	4	4.03	1.95	2.31
ENSMUSG00000001062	Vps9d1	-0.956543	0.00019466	5.07	5.08	2.62	2.71
ENSMUSG00000014504	Srp19	-0.955091	1.06184e-10	86.89	84.2	40.8	51.08
ENSMUSG00000014039	Prdm15	-0.954063	2.59158e-05	3.18	3.03	1.82	1.44
ENSMUSG00000049823	Zbtb12	-0.954049	6.30427e-10	23.85	26.19	13.63	12.69
ENSMUSG00000024913	Lrp5	-0.95399	1.19221e-15	18.12	19.33	10.66	9.11
ENSMUSG00000025494	Sigirr	-0.953856	0.000319737	8.47	8.51	4.11	4.39
ENSMUSG00000036983	Tfb1m	-0.953801	0.000125164	12.58	12.57	6.14	7.13
ENSMUSG00000026204	Ptprn	-0.953785	0.000550105	3.4	3.62	1.79	1.9
ENSMUSG00000024666	Tmem138	-0.952228	1.44082e-05	14.27	13.86	6.79	7.97
ENSMUSG00000037221	Mospd3	-0.951988	3.6598e-07	22.95	22.85	12.28	11.43
ENSMUSG00000043822	Adamtsl5	-0.951481	0.192166	1.95	2.29	1.2	0.83
ENSMUSG00000092368	A930015D03Rik	-0.950694	0.28448	1.32	1.65	0.86	0.57
ENSMUSG00000009630	Ppp2cb	-0.95064	1.1056e-23	120.07	115.14	62.39	61.44
ENSMUSG00000022967	Ifnar1	-0.950559	9.31848e-09	9.29	8.87	4.88	4.6
ENSMUSG00000023156	Rpp14	-0.949476	4.75985e-09	19.49	28.2	12.23	18.47
ENSMUSG00000024831	Ighmbp2	-0.949359	8.98033e-08	6.24	6.64	3.72	2.98
ENSMUSG00000031146	Plp2	-0.949289	3.52081e-27	212.95	204.33	110.33	109.52
ENSMUSG00000040726	Hesx1	-0.949255	0.107368	4.45	4.18	1.64	2.95
ENSMUSG00000070960	Gm19680	-0.948843	0.0458714	3.75	3.49	2.23	1.64
ENSMUSG00000020459	Mtif2	-0.948725	8.68614e-08	13.6	12.44	6.42	7.7
ENSMUSG00000053522	Lgals7	-0.948545	0.309617	3.42	3.12	2.04	1.34
ENSMUSG00000031099	Smarca1	-0.948505	5.12156e-05	4.35	4.29	2.02	2.45
ENSMUSG00000074576	Mocs3	-0.947771	2.18249e-05	10.42	11.34	6.29	5.21
ENSMUSG00000003309	Ap1m2	-0.946629	1.55445e-07	24.45	21.97	13.58	9.9
ENSMUSG00000029500	Pgam5	-0.946219	7.01354e-17	49.28	46.42	24.38	26.07
ENSMUSG00000022561	Gpaa1	-0.94585	2.57705e-11	30.42	31.59	18.16	14.75
ENSMUSG00000037174	Elf2	-0.945606	1.09977e-10	16.59	16.13	8.26	8.33
ENSMUSG00000028952	Zbtb48	-0.944886	3.20647e-05	9.23	9.14	5.39	4.33
ENSMUSG00000006179	Prss16	-0.944745	0.220788	2.41	1.74	1.45	0.69
ENSMUSG00000041859	Mcm3	-0.944523	6.59356e-38	175.25	180.33	94.95	93.18
ENSMUSG00000022089	Bin3	-0.943641	0.00145896	6.74	6.59	3.67	3.39
ENSMUSG00000054408	Spcs3	-0.943597	2.76415e-12	30.86	25.91	13.47	16.54
ENSMUSG00000020877	Scrn2	-0.942843	0.000122929	11.28	12.75	6.88	5.86
ENSMUSG00000022142	Nup155	-0.941197	9.1105e-19	17.22	18.48	9.1	9.58
ENSMUSG00000030225	Dera	-0.939368	8.15023e-12	37.35	34.97	18.17	20.2
ENSMUSG00000039195	Bbln	-0.939009	3.90154e-05	38.95	40.99	18.9	22.72
ENSMUSG00000039115	Itga9	-0.938989	5.67261e-05	3.51	3.6	1.42	1.68
ENSMUSG00000097327	E030030I06Rik	-0.938633	0.300063	4.82	7.94	2.52	2.79
ENSMUSG00000026098	Pms1	-0.93843	8.71599e-05	6.52	6.83	2.92	4.17
ENSMUSG00000025155	Dus1l	-0.937882	2.83407e-17	51.59	53.04	27.97	27.76
ENSMUSG00000032567	Aste1	-0.937785	0.00107978	6.06	5.33	3.24	2.99
ENSMUSG00000044279	Crb3	-0.937762	9.37519e-05	20.56	17.09	9.92	9.31
ENSMUSG00000011096	Akt1s1	-0.936928	1.03712e-13	53.54	56.24	30.78	26.88
ENSMUSG00000031754	Nudt21	-0.936876	1.59848e-33	149.1	157.07	83.43	78.68
ENSMUSG00000024891	Slc29a2	-0.935976	8.28793e-06	9.95	10.72	6	4.79
ENSMUSG00000028688	Toe1	-0.935707	1.12248e-11	27.53	28.03	15.42	14.1
ENSMUSG00000061633	Ndufb11b	-0.934524	0.04326	5.52	6.65	3.44	3.05
ENSMUSG00000009621	Vav2	-0.933426	1.05877e-06	4.67	4.88	2.52	2.57
ENSMUSG00000022223	Sdr39u1	-0.933165	1.76866e-05	19.19	22.52	10.03	12.21
ENSMUSG00000029028	Lrrc47	-0.932977	1.31638e-24	50.59	49.88	26.81	26.61
ENSMUSG00000038005	Hpf1	-0.932836	1.9406e-09	53.69	49.06	25.24	30.05
ENSMUSG00000029030	Tprgl	-0.932023	2.16259e-12	36.93	39.68	20.96	19.93
ENSMUSG00000064308	2410137M14Rik	-0.93106	0.0209359	10.66	11.74	7.33	4.79
ENSMUSG00000022248	Rad1	-0.930653	1.11027e-09	31.53	29.58	16.23	16.33
ENSMUSG00000041353	Tmem29	-0.926907	0.00371512	9.89	8.77	4.23	5.86
ENSMUSG00000023495	Pcbp4	-0.926045	1.09527e-18	57.69	61.33	31.83	31.95
ENSMUSG00000027300	Ubox5	-0.923569	2.37606e-05	5.3	5.71	3.2	2.71
ENSMUSG00000022658	Tagln3	-0.922933	0.369401	1.78	0.9	0.88	0.55
ENSMUSG00000019796	Lrp11	-0.922849	6.44638e-11	14.74	15.27	7.81	8.31
ENSMUSG00000025995	Wdr75	-0.92216	1.33416e-17	56.14	51.12	26.63	30.97
ENSMUSG00000022807	Osbpl11	-0.922033	1.37648e-09	9.68	9.09	5.23	4.89
ENSMUSG00000024276	Zfp397	-0.921523	0.00662206	1.49	1.54	0.84	0.78
ENSMUSG00000078865	Gm14406	-0.921156	0.311466	2.95	1.48	1.26	1.97
ENSMUSG00000026480	Ncf2	-0.920875	0.106566	1.58	1.35	0.51	0.92
ENSMUSG00000116802	Gm5165	-0.920196	0.00522341	4.51	3.52	2.03	2.28
ENSMUSG00000056167	Cnot10	-0.919943	2.60998e-21	56.58	57.49	33.34	32.99
ENSMUSG00000032459	Mrps22	-0.91922	2.19794e-08	38.71	34.91	18.91	20.66
ENSMUSG00000074671	Tspyl3	-0.919099	0.0584875	1.45	1.71	0.99	0.72
ENSMUSG00000028651	Ppie	-0.918973	2.16017e-12	59.77	63.42	32.25	34.07
ENSMUSG00000073889	Il11ra1	-0.918196	0.0743642	2.68	2.15	1.62	1.16
ENSMUSG00000031631	Cfap97	-0.916527	0.00011501	4.41	4.23	1.92	2.73
ENSMUSG00000039043	Arpin	-0.915607	0.0193711	3.19	2.88	1.63	1.65
ENSMUSG00000008153	Clstn3	-0.915548	9.78829e-12	20.69	22.29	11.1	9.33
ENSMUSG00000025271	Pfkfb1	-0.915306	0.0124074	4.69	4.55	2.45	2.54
ENSMUSG00000021248	Tmed10	-0.915021	6.49907e-20	99.19	94.52	52.69	51.9
ENSMUSG00000047045	Tmem164	-0.914968	3.01009e-07	7.4	6.62	3.63	3.6
ENSMUSG00000028447	Dctn3	-0.914753	2.75076e-10	60.17	59.63	32.68	32.12
ENSMUSG00000019467	Arhgef25	-0.914397	2.96586e-12	27.45	30.1	16.09	14.84
ENSMUSG00000028423	Nfx1	-0.913951	3.89763e-25	47.89	45.86	25.17	25.93
ENSMUSG00000026643	Nmt2	-0.913268	2.6376e-14	19.31	17.61	9.71	10.34
ENSMUSG00000068396	Rpl34-ps1	-0.91243	0.582235	3.87	7.08	3.79	2.13
ENSMUSG00000014177	Tvp23b	-0.912395	6.61936e-06	14.48	13.41	7.33	7.74
ENSMUSG00000056228	Cars2	-0.912093	1.45034e-10	28.65	30.05	16.74	15.03
ENSMUSG00000120637	ENSMUSG00000120637	-0.911752	0.324611	1.7	1.21	0.75	0.82
ENSMUSG00000027272	Ubr1	-0.911512	1.23165e-08	4.81	4.56	2.46	2.61
ENSMUSG00000030410	Dmwd	-0.911429	1.04803e-12	37.87	40.85	23.43	19.17
ENSMUSG00000073164	2410018L13Rik	-0.911246	0.0044156	2.8	3.73	1.58	1.99
ENSMUSG00000022683	Pla2g10	-0.909849	0.018929	5.25	6.18	2.92	3.36
ENSMUSG00000091105	Mrto4-ps2	-0.909695	0.563341	1.37	2.92	1.16	1.26
ENSMUSG00000039187	Fanci	-0.908208	2.53828e-17	23.62	24.45	12.45	13.64
ENSMUSG00000096795	Zfp433	-0.908117	0.117077	1.36	1.73	0.97	0.73
ENSMUSG00000040112	Mrps35	-0.90791	1.34274e-11	13.89	13.19	7.19	7.5
ENSMUSG00000062127	Cttnbp2nl	-0.907137	1.34243e-05	5.1	4.63	2.92	2.36
ENSMUSG00000043015	Nemp2	-0.906958	0.00845836	2.36	2.82	1.27	1.55
ENSMUSG00000068922	Msto1	-0.906145	5.15065e-18	62.77	61.89	33.17	34.5
ENSMUSG00000032114	Slc37a4	-0.906003	0.00740371	3.9	4.23	2.27	2.29
ENSMUSG00000031667	Aktip	-0.905962	1.86827e-10	28.07	28.34	15.5	16.59
ENSMUSG00000038622	Med30	-0.904427	6.56047e-06	28.61	33.86	16.38	17.61
ENSMUSG00000107640	Gm38804	-0.904253	0.529368	1.02	1.84	0.92	0.66
ENSMUSG00000026273	Mterf4	-0.904231	0.000521874	12.11	10.55	6.26	5.81
ENSMUSG00000050088	1600012H06Rik	-0.904083	9.90994e-05	11.27	7.79	5.31	5.34
ENSMUSG00000027552	E2f5	-0.903822	2.37009e-05	12.49	12.44	7.09	6.48
ENSMUSG00000014905	Dnajb9	-0.903059	0.00881044	3.49	3.53	2.05	1.78
ENSMUSG00000022797	Tfrc	-0.902741	3.85135e-21	99.9	95.08	48.95	58.32
ENSMUSG00000022570	Gfus	-0.902025	1.55846e-13	60.56	64.11	34.33	33.33
ENSMUSG00000020176	Grb10	-0.901526	2.73027e-18	26.59	25.47	14.95	13.45
ENSMUSG00000031688	Pou4f2	-0.900889	0.0425309	1.81	1.58	0.86	0.98
ENSMUSG00000027808	Serp1	-0.900829	4.48386e-15	19.16	18.31	9.87	10.56
ENSMUSG00000070462	Tlnrd1	-0.90038	3.8343e-13	19.01	19.86	11.51	9.71
ENSMUSG00000028416	Bag1	-0.898986	1.28063e-18	103.58	107.93	56.26	59.28
ENSMUSG00000062352	Itgb1bp1	-0.898792	6.01085e-05	17.06	18.97	9.51	9.41
ENSMUSG00000070697	Utp3	-0.897875	2.56081e-18	93.03	85.63	47.29	50.24
ENSMUSG00000049038	Mterf2	-0.897789	0.0497541	4.06	3.3	1.85	2.16
ENSMUSG00000052724	Gm9888	-0.897557	0.00859305	11.41	12.63	7.63	5.54
ENSMUSG00000040040	Ift88	-0.897415	0.0038524	3.34	3.19	1.82	1.75
ENSMUSG00000002395	Use1	-0.896767	1.04026e-17	154.34	156.08	81.6	78.55
ENSMUSG00000000409	Lck	-0.896706	4.90433e-05	9.85	11.74	6.46	5.39
ENSMUSG00000113346	Eprn	-0.895853	5.81531e-06	19.6	18.62	10.37	11.11
ENSMUSG00000041355	Ssr2	-0.895639	6.5289e-31	433.44	421.79	232.82	228.34
ENSMUSG00000068479	Mfap1a	-0.89559	7.0305e-09	11.81	12.08	5.8	7.28
ENSMUSG00000006906	Stambp	-0.895389	0.04118	2.91	2.45	1.18	1.69
ENSMUSG00000042167	Tent2	-0.894941	7.40203e-08	12.61	12.17	6.27	7.32
ENSMUSG00000027575	Arfgap1	-0.894486	5.06439e-11	26.66	25.81	16	13.04
ENSMUSG00000063672	Nkx6-3	-0.894331	0.00633773	5.86	4.28	3.15	2.39
ENSMUSG00000025402	Nab2	-0.893811	9.5974e-05	7.38	7.6	4.2	3.98
ENSMUSG00000068417	Pnp2	-0.893763	2.97164e-05	18.48	16.35	9.81	9.29
ENSMUSG00000043702	Pde12	-0.89217	4.97807e-09	5.48	5.48	3.21	2.81
ENSMUSG00000037058	Paip2	-0.892112	1.33931e-19	133.24	126.56	68.17	74.98
ENSMUSG00000021432	Slc35b3	-0.891507	0.117077	1.71	1.95	1.02	0.86
ENSMUSG00000049971	Glt1d1	-0.890673	6.00955e-08	11.75	11.97	5.87	7.15
ENSMUSG00000032182	Yipf2	-0.89032	7.83534e-05	10.25	9.23	5.18	5.28
ENSMUSG00000027313	Chac1	-0.890216	0.0939805	2.21	4.18	1.67	1.85
ENSMUSG00000037722	Gnpnat1	-0.890184	6.83289e-07	24.96	20.4	11.47	11.76
ENSMUSG00000097318	1700007L15Rik	-0.890105	0.388977	1.39	1.5	0.71	0.95
ENSMUSG00000039748	Exo1	-0.890074	6.10469e-15	11.16	10.6	5.83	6.12
ENSMUSG00000032555	Topbp1	-0.888748	7.30505e-24	47.35	46.11	24.5	26.88
ENSMUSG00000062761	Zfp512	-0.888047	6.15509e-08	11.13	11.32	5.8	6.52
ENSMUSG00000026037	Orc2	-0.887239	1.50654e-13	31.57	28.12	15.17	17.65
ENSMUSG00000009293	Ube2g2	-0.886779	2.11567e-11	31.22	30.04	17.29	16.43
ENSMUSG00000003033	Ap1m1	-0.885284	6.5116e-17	56.36	53.7	30.89	29.76
ENSMUSG00000024909	Efemp2	-0.885154	0.00500043	6.39	7.35	4.17	3.59
ENSMUSG00000021147	Wdr37	-0.884275	3.44792e-06	7.65	6.14	4	3.88
ENSMUSG00000019984	Med23	-0.881576	2.44153e-11	11.75	11.81	6.36	6.58
ENSMUSG00000033809	Alg3	-0.881545	3.24195e-05	15.64	16.62	8.93	8.84
ENSMUSG00000000903	Vpreb3	-0.881464	0.536961	1.68	2.12	0.93	0.95
ENSMUSG00000021376	Tpmt	-0.881449	0.0122294	5.25	4.99	2.84	3.08
ENSMUSG00000033222	Ttf2	-0.880439	1.09848e-14	18.7	19	10.73	10.13
ENSMUSG00000000148	Brat1	-0.880182	9.10768e-07	9	9.47	5.47	4.75
ENSMUSG00000026705	Klhl20	-0.879782	9.58719e-07	7.14	7.03	3.79	4.04
ENSMUSG00000031309	Rps6ka3	-0.879086	0.000190993	2.93	3.17	1.69	2.22
ENSMUSG00000053838	Nudcd3	-0.878998	2.00687e-17	28.22	29.25	15.99	15.85
ENSMUSG00000021556	Golm1	-0.878806	8.45505e-17	27.1	26.17	14.74	14.79
ENSMUSG00000028999	Rint1	-0.87833	4.73647e-06	8.2	9.11	5.08	5.49
ENSMUSG00000036391	Sec24a	-0.876677	0.000128256	2.8	3.12	1.88	1.53
ENSMUSG00000028251	Tstd3	-0.876207	0.00342136	7.09	8.35	4.12	4.46
ENSMUSG00000028059	Arhgef2	-0.876188	8.16038e-09	9.61	10.07	5.27	5.7
ENSMUSG00000039100	Marchf6	-0.875868	4.02011e-10	8.55	8.26	4.38	4.94
ENSMUSG00000039449	Prpf18	-0.874619	2.14643e-09	21.18	17.77	10.53	11.65
ENSMUSG00000029699	Ssc4d	-0.874314	0.000310328	13.7	12.98	6	7.37
ENSMUSG00000030059	Tmf1	-0.872954	7.37955e-07	6.19	5.84	2.97	3.7
ENSMUSG00000047036	Zfp445	-0.872924	1.26879e-12	13.48	13.28	6.62	7.65
ENSMUSG00000038206	Fbxo8	-0.871901	8.4722e-05	6.47	7.43	4.11	3.77
ENSMUSG00000013997	Nit1	-0.871592	6.06098e-07	23.37	23.38	14.01	12.49
ENSMUSG00000026111	Unc50	-0.871229	9.83743e-07	27.74	27.81	15.18	15.48
ENSMUSG00000001445	Mrpl10	-0.871161	1.3852e-13	51.1	52.29	27.71	29.8
ENSMUSG00000033047	Eif3l	-0.870559	3.37312e-32	294	285.19	163.63	158.81
ENSMUSG00000032175	Tyk2	-0.869193	6.42651e-12	17.16	18.33	11.1	9.38
ENSMUSG00000026096	Osgepl1	-0.868989	0.00755448	5.89	5.37	2.58	3.55
ENSMUSG00000038250	Usp38	-0.868958	3.9044e-14	17.18	17.97	9.85	9.75
ENSMUSG00000120224	2810001A02Rik	-0.868835	0.00891936	21.03	19.93	12.92	9.87
ENSMUSG00000118346	Tmem179b	-0.868164	0.0675881	8.14	7.58	4.69	4.07
ENSMUSG00000025225	Nfkb2	-0.867991	5.08127e-09	15.46	14.86	8.86	8.14
ENSMUSG00000029701	Rbm28	-0.867926	1.95668e-22	47.85	45.97	25.33	27
ENSMUSG00000002983	Relb	-0.867379	2.64082e-10	25.45	25.99	13.82	14.9
ENSMUSG00000020706	Ftsj3	-0.867163	8.23077e-29	123.16	119.67	66.37	69.15
ENSMUSG00000079941	Cox5b-ps	-0.866887	0.643575	1.4	2.29	0.94	1.13
ENSMUSG00000057594	Arl16	-0.866407	0.155775	4.4	4.32	2.45	2.41
ENSMUSG00000032977	Fam207a	-0.866124	9.57549e-11	30.29	27.45	17.15	15.09
ENSMUSG00000022120	Obi1	-0.86607	0.0509446	2.27	2.03	1.52	1.27
ENSMUSG00000048012	Zfp473	-0.865596	2.81391e-07	9.27	9.28	4.93	5.43
ENSMUSG00000073599	Ecscr	-0.865077	0.0276143	9.28	7.09	4.14	4.93
ENSMUSG00000024312	Wdr46	-0.864859	5.88603e-19	66.37	68.75	38.62	36.94
ENSMUSG00000102869	Norad	-0.863738	2.20919e-20	36.96	37.37	19.83	21.75
ENSMUSG00000034595	Ppp1r18	-0.863588	2.15055e-09	20.75	20.32	14.25	11.96
ENSMUSG00000022386	Trmu	-0.863533	0.0207299	5.26	6.05	3.63	2.7
ENSMUSG00000036941	Elac1	-0.863263	0.0246621	1.42	1.29	0.74	0.77
ENSMUSG00000049036	Tmem121	-0.863113	0.0572639	3.43	3.78	2.01	2.03
ENSMUSG00000024228	Nudt12	-0.862509	0.0223621	1.88	1.58	0.98	1.5
ENSMUSG00000018470	Kcnab3	-0.862225	0.0803932	1.74	2.27	1.34	0.91
ENSMUSG00000031934	Panx1	-0.862184	0.000655266	2.48	2.45	1.4	1.36
ENSMUSG00000025006	Sorbs1	-0.859995	0.117576	1.95	1.36	1.06	0.75
ENSMUSG00000079184	Mphosph8	-0.859983	8.71142e-11	33.09	31.73	15.93	20.4
ENSMUSG00000098238	Gm8756	-0.859891	0.440418	1.6	1.52	0.85	0.89
ENSMUSG00000041438	Utp4	-0.859286	5.91447e-27	160.84	157.29	91.66	86.86
ENSMUSG00000036916	Zfp280c	-0.859228	0.000472315	4.25	3.84	2.08	2.46
ENSMUSG00000058126	Tpm3-rs7	-0.859021	0.150843	1.48	1.72	0.89	0.9
ENSMUSG00000028851	Nudc	-0.858888	1.67834e-30	411.3	419.73	236.83	229.52
ENSMUSG00000024962	Vegfb	-0.858606	1.64661e-05	23.65	24.59	12.21	14.92
ENSMUSG00000116705	Gm29737	-0.858249	0.610262	5.27	2.61	2.4	1.95
ENSMUSG00000018287	Spag7	-0.857862	1.21777e-14	92.07	91.63	51.38	51.74
ENSMUSG00000048327	Ckap2l	-0.85644	2.46443e-07	12.36	12.45	6.33	7.61
ENSMUSG00000030019	Fbxl14	-0.85638	2.9917e-15	35.12	37.79	20.93	20.1
ENSMUSG00000039001	Rps21	-0.85545	1.96214e-30	4618.47	4315.75	2532.7	2464.27
ENSMUSG00000031984	2810004N23Rik	-0.854837	7.72808e-18	66.67	62.79	35.13	37.77
ENSMUSG00000060600	Eno3	-0.854659	0.000169509	13.48	14.92	7.98	7.54
ENSMUSG00000038732	Mboat1	-0.854112	0.0522988	1.86	2.11	0.96	1.28
ENSMUSG00000037251	Pomk	-0.853217	3.71362e-06	8.22	8.28	4.23	5.07
ENSMUSG00000002068	Ccne1	-0.853106	3.9665e-23	113.34	116.38	64.31	65.16
ENSMUSG00000019590	Cyb561	-0.853013	1.14683e-05	11.43	11.56	5.64	6.28
ENSMUSG00000056131	Pgm3	-0.85289	7.5076e-08	16.97	17.66	8.93	10.88
ENSMUSG00000066000	Zfp979	-0.852887	1.79468e-08	26.55	23.78	12.35	15.95
ENSMUSG00000004771	Rab11a	-0.852637	2.15272e-07	40.78	32.42	21.25	18.71
ENSMUSG00000025487	Psmd13	-0.852036	3.81072e-23	115.52	118.33	64.39	63.6
ENSMUSG00000015994	Fnta	-0.851761	3.30399e-18	87.58	83	49.94	46.26
ENSMUSG00000022024	Sugt1	-0.851629	7.81394e-17	19	17.15	10.09	10.3
ENSMUSG00000062931	Zfp938	-0.851162	0.0946205	2.29	2.12	1.17	1.32
ENSMUSG00000027082	Tfpi	-0.85044	1.6309e-05	16.92	15.55	9.61	8.56
ENSMUSG00000040502	Marchf9	-0.84829	1.99811e-05	8.14	9.29	5.33	4.55
ENSMUSG00000063052	Lrrc40	-0.847901	2.33542e-10	14.27	13.47	7.6	8.07
ENSMUSG00000020519	Sap30l	-0.845285	0.000736669	15.17	18.17	9.97	8.94
ENSMUSG00000039936	Pik3cd	-0.844633	9.99461e-07	6.43	6.93	3.82	3.72
ENSMUSG00000049516	Spty2d1	-0.844166	0.00241999	2.63	2.35	1.59	1.24
ENSMUSG00000041645	Ddx24	-0.843773	4.54161e-20	61.51	59.41	34.69	34.11
ENSMUSG00000054309	Cpsf3	-0.843089	1.41787e-16	51.4	51.03	27.98	30.09
ENSMUSG00000055720	Ubl7	-0.843003	2.60161e-08	36.22	35.04	19.62	20.69
ENSMUSG00000059326	Csf2ra	-0.842593	0.000311535	12.55	13.89	8.93	6.21
ENSMUSG00000055991	Zkscan5	-0.84216	2.43534e-06	7.73	7.78	4.33	4.36
ENSMUSG00000032952	Ap4b1	-0.842062	2.01164e-05	9.76	10.45	6.3	5.07
ENSMUSG00000083061	Gm12191	-0.841572	0.860269	16.33	16.96	0	19.39
ENSMUSG00000040820	Hlcs	-0.840626	0.00155866	2.87	2.99	1.55	1.5
ENSMUSG00000066613	Zfp932	-0.839992	0.00276176	9.21	13.31	7.05	6.72
ENSMUSG00000023393	Slc17a9	-0.839414	0.000365843	7.51	8.33	4.32	4.7
ENSMUSG00000087377	AV099323	-0.83917	0.350551	50.55	52.52	42.13	16.44
ENSMUSG00000028825	Rhd	-0.837635	0.079658	3.78	3.62	1.7	2.51
ENSMUSG00000018570	2810408A11Rik	-0.837379	0.0571758	3.59	4.68	2.22	2.36
ENSMUSG00000038722	Bud31	-0.837193	6.05825e-10	108.84	93.64	56.38	59.9
ENSMUSG00000063047	Zfp780b	-0.83703	0.0173194	2.53	2.67	1.51	1.31
ENSMUSG00000039016	Timm8b	-0.836875	3.70686e-09	171.44	166.36	94.64	97.26
ENSMUSG00000065999	Zfp985	-0.835119	0.068921	1.92	1.89	0.97	1.2
ENSMUSG00000033054	Npat	-0.834905	5.40568e-08	6.59	6.61	3.62	3.91
ENSMUSG00000074221	Zfp568	-0.834718	4.17254e-20	36.6	34.59	19.86	21.08
ENSMUSG00000082381	Gm12928	-0.834608	0.701548	0.94	1.7	1.41	0.28
ENSMUSG00000024163	Mapk8ip3	-0.834026	1.29741e-08	11.74	13.39	8.01	6.34
ENSMUSG00000091537	Tma7	-0.833775	2.88296e-16	254.02	218.48	133.05	136.38
ENSMUSG00000040557	Mettl27	-0.833406	0.00494225	5.77	6.53	3.49	3.14
ENSMUSG00000022346	Myc	-0.833081	1.2798e-08	27.5	33.33	19.91	14.94
ENSMUSG00000118181	Gm53015	-0.83259	0.52298	3.12	2.22	0.46	2.59
ENSMUSG00000051518	Rps19bp1	-0.8306	3.60281e-09	81.83	82.05	48.95	44.78
ENSMUSG00000021326	Trim27	-0.830393	1.72771e-20	123.36	128.45	69.4	73.51
ENSMUSG00000038225	Primpol	-0.829585	0.0115697	5.04	4.47	1.89	3.35
ENSMUSG00000090266	Mettl23	-0.829538	0.0183613	7.27	7.52	4.58	3.9
ENSMUSG00000028419	Chmp5	-0.829471	7.80279e-09	43.59	37.47	22.43	23.94
ENSMUSG00000037296	Lsm1	-0.828076	5.80428e-09	18.68	18.4	10.48	10.78
ENSMUSG00000021318	Gli3	-0.827869	0.000651346	1.81	1.96	1.04	1.12
ENSMUSG00000032590	Apeh	-0.827338	3.96759e-08	21.33	24.28	14.29	11.9
ENSMUSG00000031511	Arhgef7	-0.827322	2.40133e-12	17.99	17.8	9.8	10.68
ENSMUSG00000116009	Gm49503	-0.827166	0.560445	2.7	1.28	1.58	0.68
ENSMUSG00000039330	Tsga10ip	-0.827143	0.244819	2.08	2.71	1.5	0.93
ENSMUSG00000025413	Ttc4	-0.827088	5.39658e-11	31.84	32.13	18.53	18.18
ENSMUSG00000031165	Was	-0.826396	0.194806	1.65	1.3	0.81	0.88
ENSMUSG00000004661	Arid3b	-0.826022	9.95385e-13	26.16	24.56	14.05	13.15
ENSMUSG00000035601	Trmt10b	-0.825936	0.000943112	7.92	7.99	4.19	4.94
ENSMUSG00000114102	Gm48048	-0.825809	0.12971	15.83	20.65	7.13	13.88
ENSMUSG00000021774	Ube2e1	-0.825439	0.000115051	17.4	15.98	9.98	9.21
ENSMUSG00000031788	Kifc3	-0.825362	1.63506e-12	26.78	25.69	15.66	14.88
ENSMUSG00000038000	Acd	-0.825077	1.66768e-08	15.1	14.23	8.45	8.41
ENSMUSG00000039660	Spout1	-0.823817	1.12699e-11	54.82	52.14	33.08	28.44
ENSMUSG00000068856	Sf3b4	-0.823794	6.01698e-21	132.96	137.17	80.7	74.7
ENSMUSG00000025839	Pramel7	-0.823697	0.215418	1.87	1.36	0.97	0.88
ENSMUSG00000022842	Ece2	-0.822687	0.0386794	1.92	2.39	1.25	1.28
ENSMUSG00000013155	Enkd1	-0.822552	4.05325e-05	20.65	23.54	13	12.45
ENSMUSG00000054733	Msra	-0.822303	0.0304673	5.43	4.98	3.12	3.17
ENSMUSG00000032673	Prorsd1	-0.822047	0.00455571	16.27	12.98	8.16	8.74
ENSMUSG00000001082	Mfsd10	-0.821423	2.96237e-14	70.82	80.08	41.82	45.89
ENSMUSG00000044768	Macir	-0.820528	0.0408765	2.28	1.83	1	0.98
ENSMUSG00000039318	Rab3gap2	-0.819431	1.3353e-08	9.19	9.29	5.17	4.98
ENSMUSG00000032513	Gorasp1	-0.819402	9.4075e-06	7.54	7.19	4.58	3.94
ENSMUSG00000034566	Atp5h	-0.818367	1.00534e-18	423.37	406.43	232.96	245.09
ENSMUSG00000104496	Gm5837	-0.817431	0.356039	1.32	1.47	0.79	0.85
ENSMUSG00000039830	Olig2	-0.817123	2.02775e-09	21.51	21.97	12.72	12.42
ENSMUSG00000034190	Chmp7	-0.817063	1.73512e-10	27.35	25.95	16.24	14.56
ENSMUSG00000010538	Tsacc	-0.81697	0.215546	8.08	8	3.64	5.75
ENSMUSG00000019487	Trip10	-0.816667	1.06695e-13	49.95	47.2	28.03	28.41
ENSMUSG00000024835	Coro1b	-0.81649	9.46978e-16	74.05	80.65	44.07	45.38
ENSMUSG00000063334	Krr1	-0.816423	1.37417e-11	26.53	24.9	12.27	11.83
ENSMUSG00000115018	Ndor1	-0.816278	0.00617224	5.83	7.18	4.32	3.25
ENSMUSG00000048222	Mfap1b	-0.81615	1.05369e-11	23.61	22.83	13.98	12.88
ENSMUSG00000062554	Gm12751	-0.815616	0.00209235	114.09	94.32	53.89	66.27
ENSMUSG00000046380	Jrk	-0.815068	0.0142679	1.41	1.58	0.9	0.84
ENSMUSG00000044894	Uqcrq	-0.814426	2.59185e-18	276.24	327.55	188.28	204.7
ENSMUSG00000017837	Nkiras2	-0.814426	1.82095e-08	26.83	24.68	15.71	14.15
ENSMUSG00000070708	Gtsf1l	-0.813408	0.0026594	20.66	23.32	13.57	11.92
ENSMUSG00000044783	Hjurp	-0.813305	2.13779e-17	34.52	33.65	20.18	18.61
ENSMUSG00000032869	Psmf1	-0.812725	2.26914e-07	15.46	18.47	12.69	10.29
ENSMUSG00000029725	Ppp1r35	-0.810257	6.32193e-06	39	44	25.19	23.02
ENSMUSG00000002103	Acp2	-0.81001	0.000196849	4.01	4.5	2.49	2.46
ENSMUSG00000026836	Acvr1	-0.809788	0.0569872	1.9	2.55	1.12	1.38
ENSMUSG00000021951	Eef1akmt1	-0.809772	5.94045e-05	35.41	37.09	20.24	21.43
ENSMUSG00000025574	Tk1	-0.809659	3.00535e-14	79.61	82.67	46.71	47.53
ENSMUSG00000002814	Top3a	-0.809627	4.49639e-09	13.87	14.58	8.2	8.27
ENSMUSG00000054708	Ankrd24	-0.809563	0.0147008	2.47	2.65	1.38	1.6
ENSMUSG00000024791	Cdca5	-0.809221	1.33126e-15	61.99	61.58	36.12	35.67
ENSMUSG00000046909	Tefm	-0.809128	0.00212528	12.68	13.16	6.57	8.43
ENSMUSG00000042988	Notum	-0.808926	9.30712e-06	15.27	18.24	9.08	10.28
ENSMUSG00000087263	Gm15726	-0.808275	0.694514	1.78	1.27	1.12	0.64
ENSMUSG00000092118	Fancf	-0.808177	0.0121356	6.27	6.33	4.06	3.27
ENSMUSG00000022412	Mief1	-0.808076	8.73259e-12	16.48	15.67	9.03	9.22
ENSMUSG00000006311	Etv2	-0.80755	0.275164	2.78	2.58	1.74	1.37
ENSMUSG00000033491	Prss35	-0.806336	0.0211401	2.47	2.49	1.59	1.3
ENSMUSG00000090470	Prr23a3	-0.806293	0.0264409	4.21	5.1	2.77	2.65
ENSMUSG00000067261	Foxd3	-0.806225	7.60243e-07	16.18	17.67	10.29	9.44
ENSMUSG00000033075	Senp1	-0.805323	1.49722e-14	22.42	20.88	11.13	11.72
ENSMUSG00000039068	Zzz3	-0.80525	5.61095e-12	20.18	17.64	11.05	12.74
ENSMUSG00000032369	Plscr1	-0.804963	0.000107471	15.35	14.2	8.13	9.07
ENSMUSG00000000782	Tcf7	-0.804606	4.55825e-07	16.88	19.04	10.61	10.51
ENSMUSG00000068917	Clk2	-0.803984	1.22188e-09	29.51	31.76	18.5	17.22
ENSMUSG00000023249	Parp3	-0.803845	0.0278909	4.41	3.66	2.52	1.78
ENSMUSG00000036863	Syde2	-0.803726	1.45356e-07	8.63	8.56	4.79	5.46
ENSMUSG00000021639	Gtf2h2	-0.803696	4.14586e-05	20.78	19.35	10.02	13.35
ENSMUSG00000061244	Exoc5	-0.802735	2.37106e-05	7.73	6.92	4.28	3.45
ENSMUSG00000021868	Ppif	-0.801584	1.43529e-10	53.79	56.76	30.17	34.38
ENSMUSG00000061371	Zfp873	-0.801464	0.0953891	2.24	1.94	1.23	1.22
ENSMUSG00000038319	Kcnh2	-0.801437	0.00830024	2.67	2.72	1.84	1.44
ENSMUSG00000111291	Gm48604	-0.801387	0.182596	1.47	1.29	0.83	0.78
ENSMUSG00000037544	Dlgap5	-0.800975	8.85248e-15	36.98	35.75	20.48	20.67
ENSMUSG00000020495	Smg8	-0.800587	1.6673e-10	21.26	23.32	13.23	12.85
ENSMUSG00000035529	Prdm4	-0.800459	1.16994e-09	15.5	14.73	9.11	8.65
ENSMUSG00000030397	Mark4	-0.799426	6.56047e-06	8.83	9.67	6.02	4.81
ENSMUSG00000046229	Scand1	-0.799153	0.00209196	27.88	30.97	20.28	14.19
ENSMUSG00000057219	Armc7	-0.798411	0.0425326	3.64	2.84	2.02	1.77
ENSMUSG00000073411	H2-D1	-0.797631	2.06632e-06	20.35	17.97	11.36	11.11
ENSMUSG00000018326	Ywhab	-0.797553	1.86329e-19	80.06	74.93	46.58	44.2
ENSMUSG00000082394	Gm4596	-0.797527	0.662967	2.41	2.78	2.12	0.87
ENSMUSG00000118668	Rps6ka4	-0.797511	0.000473427	5.73	6.27	3.75	3.29
ENSMUSG00000034403	Pja1	-0.797294	1.1965e-06	18.21	18.94	11.98	9.54
ENSMUSG00000030752	Kdm8	-0.796669	0.0395416	2.87	3.06	1.79	1.69
ENSMUSG00000084796	Mir142hg	-0.796553	0.0782184	3.86	5.55	2.79	2.74
ENSMUSG00000021728	Emb	-0.7961	2.24242e-09	23.5	24.34	12.86	15.19
ENSMUSG00000001576	Ergic1	-0.795877	1.28449e-16	54.92	57.57	37.74	34.23
ENSMUSG00000031796	Cfap20	-0.795856	1.32304e-10	64.6	60	35.98	33.97
ENSMUSG00000019763	Rmnd1	-0.795596	9.79967e-05	7.34	6.96	4.18	4.21
ENSMUSG00000074698	Csnk2a1	-0.795344	1.07064e-19	72.86	71.99	40.03	44.95
ENSMUSG00000026843	Fubp3	-0.795256	3.9721e-19	63.88	59.79	35.79	37.3
ENSMUSG00000029642	Polr1d	-0.794394	3.23815e-16	145.7	141.46	82.3	86.38
ENSMUSG00000058594	Fbh1	-0.794028	1.44037e-09	16.25	17.24	9.88	9.8
ENSMUSG00000027940	Tpm3	-0.79347	4.35536e-25	334.11	315.83	183.83	197.79
ENSMUSG00000004535	Tax1bp1	-0.793144	2.68993e-16	59.29	53.29	32.18	33.93
ENSMUSG00000030471	Zdhhc13	-0.792586	2.45548e-05	11.12	11.49	6.74	6.55
ENSMUSG00000061411	Nol4l	-0.792306	0.000270169	3.36	4.25	2.27	2.18
ENSMUSG00000039656	Rxrb	-0.791918	4.29329e-11	34.74	38.66	22.38	20.51
ENSMUSG00000025193	Cutc	-0.791771	0.0412224	7.76	5.82	3.87	4.15
ENSMUSG00000040354	Mars1	-0.791339	1.42046e-21	101.03	107.65	62.16	60.67
ENSMUSG00000029610	Aimp2	-0.791245	6.25338e-09	56.92	60.45	36.25	32.81
ENSMUSG00000040272	Accs	-0.790944	0.0872381	1.51	1.5	1.35	1.03
ENSMUSG00000045348	Nyap1	-0.790628	0.000239219	6.56	6.67	4.12	3.92
ENSMUSG00000047557	Lxn	-0.789457	0.0707948	6.87	6.08	4.5	3.12
ENSMUSG00000029141	Slc4a1ap	-0.789307	2.04663e-06	14.2	14.61	8.58	8.11
ENSMUSG00000030335	Mrpl51	-0.788953	5.37407e-13	28.43	28.34	17.22	16.25
ENSMUSG00000033581	Igf2bp2	-0.78859	6.06981e-10	16.93	18.89	10.48	10.73
ENSMUSG00000003808	Farsa	-0.788456	2.23491e-17	120.96	118.2	74.06	66.88
ENSMUSG00000038507	Parp12	-0.787492	0.0970776	1.5	1.47	0.89	0.86
ENSMUSG00000026000	Lancl1	-0.787386	8.25132e-06	16.22	15.77	10.98	9.5
ENSMUSG00000031785	Adgrg1	-0.787005	0.00966818	2.83	2.97	1.67	1.76
ENSMUSG00000032239	Rp9	-0.786627	8.85315e-05	24.32	26.26	13.97	16
ENSMUSG00000120992	ENSMUSG00000120992	-0.786382	4.07212e-10	22.47	22.83	12.78	14.06
ENSMUSG00000029703	Lrwd1	-0.785821	3.63499e-12	42.67	45.14	27.5	24.39
ENSMUSG00000033088	Triobp	-0.784452	9.63713e-13	40.92	41.99	25.67	23.16
ENSMUSG00000007603	Dus3l	-0.782759	1.29744e-10	54.53	57.09	36.29	29.79
ENSMUSG00000026516	Nvl	-0.782199	1.16446e-12	13.18	12.31	7.03	8.05
ENSMUSG00000020455	Trim11	-0.782154	0.000148524	13	11.79	8.61	6.09
ENSMUSG00000049411	Tmem241	-0.782001	0.162329	1.92	2.24	1.29	1.4
ENSMUSG00000004642	Slbp	-0.781596	4.83195e-16	145.25	133.75	81.67	81.32
ENSMUSG00000120850	ENSMUSG00000120850	-0.781038	0.258788	2.1	2.66	1.24	1.6
ENSMUSG00000041278	Ttc1	-0.780931	1.19817e-07	45.62	41.25	23.37	28.02
ENSMUSG00000020022	Ndufa12	-0.780814	5.9153e-13	348.39	320.2	205.8	190.27
ENSMUSG00000050332	Amer1	-0.7808	0.000279621	2.36	2.21	1.32	1.39
ENSMUSG00000007039	Ddah2	-0.780734	6.01045e-10	55.24	54.61	32.05	32.74
ENSMUSG00000045948	Mrps12	-0.78069	4.11667e-09	110.19	120.99	68.15	71.4
ENSMUSG00000025464	Paox	-0.780539	2.37009e-05	11.23	11.04	6.23	5.03
ENSMUSG00000042642	Flad1	-0.779208	8.30992e-05	9.66	9.33	6.26	5.32
ENSMUSG00000004961	Syt5	-0.777975	0.271745	1.63	1.46	0.81	1.02
ENSMUSG00000024014	Pim1	-0.777917	1.51804e-11	44.05	51.29	29.64	27
ENSMUSG00000027998	Plrg1	-0.777616	2.20307e-13	62.88	59.88	36.14	36.73
ENSMUSG00000097709	2810429I04Rik	-0.77722	0.0450567	2.85	3.44	1.79	1.8
ENSMUSG00000053536	Cstf2t	-0.776956	8.76368e-07	10.05	8.96	5.8	5.5
ENSMUSG00000071653	1810009A15Rik	-0.776921	4.69992e-12	198.53	186.82	105.72	122.91
ENSMUSG00000006676	Usp19	-0.775274	3.21936e-15	50.59	50.8	32.47	27.58
ENSMUSG00000025537	Phkg1	-0.77526	0.137983	1.75	1.84	1.1	1.04
ENSMUSG00000027263	Tubgcp4	-0.775241	4.06875e-06	8.93	9.46	6.23	5.5
ENSMUSG00000024174	Pot1b	-0.774978	0.000926947	5.59	4.98	2.92	3.31
ENSMUSG00000041649	Klf8	-0.774249	1.12208e-06	8.68	8.15	4.84	5.17
ENSMUSG00000017307	Acot8	-0.774042	0.00056174	18.83	20.82	11.3	12.5
ENSMUSG00000036873	2410004B18Rik	-0.773968	0.000298535	17.31	17.81	11.98	8.95
ENSMUSG00000081126	Gm15784	-0.773642	0.351071	1.36	1.75	0.67	1.18
ENSMUSG00000031577	Tti2	-0.773587	3.78333e-06	14.37	13.24	8.85	7
ENSMUSG00000038712	Mindy1	-0.773326	1.82522e-12	40.12	42.33	23.61	23.53
ENSMUSG00000050538	B230217C12Rik	-0.773306	0.18251	2.73	2.95	1.65	1.85
ENSMUSG00000026553	Copa	-0.773155	6.93685e-17	48.47	45.31	28.98	26.49
ENSMUSG00000050212	Eva1b	-0.77166	0.00224188	12.71	16.29	8.86	8.41
ENSMUSG00000027959	Sass6	-0.771078	0.0372292	4.02	4.13	1.89	2.98
ENSMUSG00000035151	Elmod2	-0.770964	0.0286503	2.27	1.71	1.2	1.15
ENSMUSG00000008301	Phax	-0.770768	4.15749e-09	33.53	33.58	19.09	20.82
ENSMUSG00000037111	Setd7	-0.770742	0.00148753	2.02	2.11	1.27	1.2
ENSMUSG00000039294	Cybc1	-0.768744	0.00152797	7.27	7.42	4.87	3.94
ENSMUSG00000063200	Nol7	-0.768178	2.81414e-10	104.54	103.66	60.87	59.27
ENSMUSG00000064030	Pym1	-0.767577	8.11367e-10	67.14	67.25	39.7	40.58
ENSMUSG00000032860	P2ry2	-0.76719	0.0101376	4.21	5.63	2.82	3.26
ENSMUSG00000057388	Mrpl18	-0.766735	1.5196e-12	120.7	122.82	67.52	78.1
ENSMUSG00000036555	Iqce	-0.766392	0.00164751	3.48	3.37	2.2	2.15
ENSMUSG00000044037	Als2cl	-0.766224	0.000260107	4.25	4.23	2.74	2.34
ENSMUSG00000061207	Stk19	-0.766024	0.0006576	19.7	19.73	12.19	11.41
ENSMUSG00000030208	Emp1	-0.765888	1.56394e-05	13.06	11.56	7.82	6.92
ENSMUSG00000023048	Prr13	-0.765693	9.83967e-06	34.73	35.33	20.36	21.77
ENSMUSG00000073197	5730507C01Rik	-0.764811	0.0215191	4.4	4.12	2.09	3
ENSMUSG00000003812	Dnase2a	-0.763973	2.05891e-05	18.51	20.6	12.63	11.81
ENSMUSG00000020186	Csrp2	-0.763906	2.90074e-13	135.51	127.26	78.8	82.03
ENSMUSG00000039599	Fam149b	-0.763755	0.000525402	8.64	7.87	4.91	5.49
ENSMUSG00000028693	Nasp	-0.763522	6.33683e-20	391.07	379.04	213.31	244.2
ENSMUSG00000024217	Snrpc	-0.763406	3.9721e-19	441.74	416.42	256.79	256.26
ENSMUSG00000029544	Cabp1	-0.763262	0.00310723	19.53	17.39	13.11	9.99
ENSMUSG00000032199	Polr2m	-0.76313	5.1052e-22	505.88	518.87	275.14	265.53
ENSMUSG00000024146	Cript	-0.762915	3.18549e-05	30.29	28.49	16.32	18.9
ENSMUSG00000019373	Cops3	-0.762783	1.73413e-12	91.6	82.97	49.44	55.22
ENSMUSG00000021537	Cetn3	-0.762732	8.26065e-06	42.98	34.35	22.21	24.09
ENSMUSG00000017721	Pigt	-0.762108	7.30463e-15	53.7	55.22	33.31	32.05
ENSMUSG00000032042	Srpr	-0.76113	6.4e-15	63.27	63.94	35.71	40.69
ENSMUSG00000079104	Prps1l3	-0.760031	1.49689e-08	38.93	35.3	22.39	22.23
ENSMUSG00000035121	Neil2	-0.759537	0.108388	2.84	2.86	2.03	1.4
ENSMUSG00000035726	Supt16	-0.759295	1.13589e-20	79.63	77.3	45.31	49.09
ENSMUSG00000004948	Zp3	-0.759273	0.00833443	9.76	10.59	6.37	5.87
ENSMUSG00000093803	Ppp2r3d	-0.758604	0.015751	3.33	4.13	2.86	1.64
ENSMUSG00000004665	Cnn2	-0.75827	9.68917e-09	24.61	27.05	15.48	15.63
ENSMUSG00000059791	Nrm	-0.758189	8.18491e-05	21.11	26.76	13.74	15.13
ENSMUSG00000058173	Smco4	-0.757589	0.105797	6.16	7.42	3.92	4.43
ENSMUSG00000020024	Cep83	-0.757558	3.39553e-06	9.61	9.71	5.77	5.87
ENSMUSG00000019737	Syne4	-0.756615	0.0101846	9.11	10.25	5.99	5.69
ENSMUSG00000103034	Gm8797	-0.755821	0.703318	2.42	1.2	1.22	1.12
ENSMUSG00000027247	Arhgap1	-0.755747	4.65954e-11	28.72	28.47	17.27	16.49
ENSMUSG00000066057	Gm1976	-0.755116	0.305895	2.98	2.19	1.07	1.39
ENSMUSG00000016257	Prelid3b	-0.754719	1.24663e-09	55.01	56.93	30.79	36.18
ENSMUSG00000039824	Myl6b	-0.754404	0.00891411	13.8	13.98	7.99	8.77
ENSMUSG00000062309	Rpp25	-0.754386	3.14607e-13	97.94	106.51	62.91	60.5
ENSMUSG00000113061	Rps18-ps5	-0.754065	0.48843	4.7	2.33	2.16	2.15
ENSMUSG00000026740	Dnajc1	-0.753806	0.0074232	2.25	2.22	1.26	1.47
ENSMUSG00000038037	Socs1	-0.753596	0.137081	1.81	1.55	1.19	0.83
ENSMUSG00000031671	Setd6	-0.753364	4.97514e-08	32.8	34.27	19.78	20.73
ENSMUSG00000058186	Zfp980	-0.753139	4.79591e-09	21.85	19.85	11.51	13.66
ENSMUSG00000036160	Surf6	-0.752922	6.65819e-13	38.08	36.96	23.19	22.15
ENSMUSG00000072969	Armcx5	-0.752691	0.0208014	4.03	3.6	1.94	2.67
ENSMUSG00000027080	Med19	-0.752287	4.28706e-09	36.13	34.88	20.16	22.75
ENSMUSG00000049091	Sephs2	-0.752245	1.71497e-15	74.78	77.28	46.97	44.96
ENSMUSG00000052337	Immt	-0.751388	1.08835e-22	147	145.79	88.07	90.42
ENSMUSG00000028191	Bcl10	-0.751326	6.1704e-07	24.74	23.03	14.03	14.84
ENSMUSG00000030446	Zfp273	-0.750695	0.175942	1.84	1.55	0.99	1.08
ENSMUSG00000026427	Eif2d	-0.750349	2.64346e-13	65.48	61.46	39.21	38.35
ENSMUSG00000022216	Psme1	-0.749426	2.2077e-09	74.56	70.05	44.03	43.38
ENSMUSG00000009876	Cox4i2	-0.749275	0.543777	2.04	1.86	0.97	1.39
ENSMUSG00000030990	Pgap2	-0.748907	8.54767e-05	15.74	16	9.5	10.28
ENSMUSG00000038894	Irs2	-0.748607	0.00126973	2.84	3.21	2.05	1.62
ENSMUSG00000032125	Robo4	-0.748262	0.00441775	3.29	3.42	2.26	1.91
ENSMUSG00000117098	Gm49909	-0.747115	1.19726e-16	486.24	444.6	268.29	258.75
ENSMUSG00000006218	Fam131c	-0.746993	0.159159	2.79	3.87	2.16	1.9
ENSMUSG00000029176	Anapc4	-0.746021	8.5514e-09	16.61	17.13	9.69	10.79
ENSMUSG00000085208	Brip1os	-0.745632	0.000617918	5.25	4.86	2.66	3.46
ENSMUSG00000039253	Fn3krp	-0.745157	0.00662131	5.38	5.04	3.27	3.06
ENSMUSG00000055235	Wdr86	-0.744942	0.0137179	4.49	5.37	3.18	2.82
ENSMUSG00000005881	Ergic3	-0.744286	2.4217e-13	96.65	96.96	59.56	58.07
ENSMUSG00000022999	Lmbr1l	-0.743983	0.000449834	9.12	9.76	5.87	5.62
ENSMUSG00000021144	Mta1	-0.743505	5.35936e-14	49.16	52.41	30.75	31.04
ENSMUSG00000001065	Zfp276	-0.743454	0.000232255	5.95	6.19	4.06	3.33
ENSMUSG00000040824	Snrpd2	-0.742738	4.9521e-19	190.83	190.34	115.08	116.72
ENSMUSG00000008489	Elavl2	-0.742607	0.00096251	7.18	5.99	3.7	4.38
ENSMUSG00000012535	Tnpo3	-0.741988	2.78421e-21	84.61	81.1	50.15	51.12
ENSMUSG00000028687	Mutyh	-0.741971	0.00291155	9.92	10.46	6.52	5.89
ENSMUSG00000070427	Il18bp	-0.741448	0.234168	1.7	1.66	0.88	1.04
ENSMUSG00000024266	Adad2	-0.741403	0.108092	2.51	3.54	1.87	1.83
ENSMUSG00000031170	Slc38a5	-0.741148	0.016245	5.79	8.2	4.05	4.5
ENSMUSG00000026201	Stk16	-0.740977	1.31861e-07	20.91	21.39	14.04	11.76
ENSMUSG00000038335	Tsr1	-0.740565	1.43249e-18	78.91	75.27	46.04	47.9
ENSMUSG00000028792	Ak2	-0.739942	5.53466e-19	152.2	149.72	90.36	92.75
ENSMUSG00000035898	Uba6	-0.738828	2.99503e-06	6.52	6.69	3.63	4.43
ENSMUSG00000049106	Dcaf5	-0.738666	0.000146915	4.13	4.24	2.63	2.48
ENSMUSG00000021770	Samd8	-0.73849	0.00196162	3.47	3.89	1.98	2.04
ENSMUSG00000041779	Tram2	-0.736883	0.00262276	2.25	2.43	1.42	1.44
ENSMUSG00000030083	Abtb1	-0.736645	1.23591e-05	21.44	23.62	14.98	12.59
ENSMUSG00000107292	Gm42733	-0.736573	0.699721	1.56	1.95	0.74	1.48
ENSMUSG00000028689	Ccdc163	-0.735254	0.0830378	6.66	4.66	3.56	3.26
ENSMUSG00000030413	Pglyrp1	-0.735108	0.00323109	35.05	30.58	19.29	20.72
ENSMUSG00000025007	Aldh18a1	-0.735092	9.03562e-13	35.15	37.9	21.89	22.8
ENSMUSG00000021368	Tbc1d7	-0.733931	0.00287677	16.07	14.64	8.57	10.2
ENSMUSG00000045435	Tmem60	-0.733856	0.00980061	12.57	12.1	7.75	7.33
ENSMUSG00000038521	C1s1	-0.733352	0.0330372	2.91	3.09	1.72	1.99
ENSMUSG00000027342	Pcna	-0.733089	1.53817e-19	419.78	379.25	238.5	250.64
ENSMUSG00000026632	Tatdn3	-0.732837	0.166382	4.74	3.71	2.33	2.79
ENSMUSG00000009681	Bcr	-0.732626	1.29376e-06	8.08	7.88	4.49	4.87
ENSMUSG00000069743	Zfp820	-0.732503	0.140746	1.82	1.24	1.13	0.73
ENSMUSG00000120477	ENSMUSG00000120477	-0.731695	0.0218503	4.21	4.04	2.1	2.95
ENSMUSG00000066640	Fbxl18	-0.731151	7.54519e-08	7.53	8.03	5.14	4.42
ENSMUSG00000032966	Fkbp1a	-0.730373	8.39428e-20	237.92	223.98	139.5	143.8
ENSMUSG00000117621	Hspe1-rs1	-0.730194	0.343279	8.51	6.94	4.52	5.22
ENSMUSG00000078816	Prkcg	-0.729739	0.0561435	2.51	2.5	1.66	1.72
ENSMUSG00000031389	Arhgap4	-0.729202	0.14275	1.62	1.42	0.77	1.06
ENSMUSG00000032093	Cd3e	-0.727965	0.4194	1.17	1.39	0.72	0.86
ENSMUSG00000024033	Rsph1	-0.727108	0.329805	2.3	2.27	1.34	1.5
ENSMUSG00000039367	Sec24c	-0.72675	3.37421e-17	48.31	50.34	30.13	30.49
ENSMUSG00000030805	Stx4a	-0.726614	8.2665e-06	39.1	33.13	24	20.72
ENSMUSG00000002608	Ccdc97	-0.726574	2.14669e-06	16.77	16.61	11.34	9.21
ENSMUSG00000036257	Pnpla8	-0.726274	0.00121694	7.22	6.82	3.68	5.2
ENSMUSG00000057375	Yipf1	-0.725659	0.000784026	16.84	18.16	10.61	10.94
ENSMUSG00000024842	Cabp4	-0.725515	0.20657	2.7	3.12	2.11	1.48
ENSMUSG00000018774	Cd68	-0.723785	0.0114475	12.15	11.15	7.75	6.54
ENSMUSG00000028104	Polr3gl	-0.723336	0.00598278	15.69	15.18	8.97	10.82
ENSMUSG00000069808	Tlcd3a	-0.723108	0.144912	2.24	2.24	1.48	1.28
ENSMUSG00000061458	Nol10	-0.723042	1.18531e-10	45.67	39.16	25.37	26.91
ENSMUSG00000030224	Strap	-0.721963	2.44888e-16	144.77	135.59	81.5	91.49
ENSMUSG00000095098	Ccdc85b	-0.721677	0.00426924	3.02	3.38	1.97	1.95
ENSMUSG00000079658	Eloc	-0.721138	4.35748e-07	84.45	68.56	51.89	56.33
ENSMUSG00000000792	Slc5a5	-0.720884	0.169316	1.5	1.5	1.1	0.75
ENSMUSG00000020412	Ascc2	-0.720806	1.59173e-07	15.67	16.67	11.28	10.05
ENSMUSG00000061360	Phf5a	-0.72076	3.11139e-14	111.1	103.92	67.61	65.14
ENSMUSG00000038181	Chpf2	-0.720197	0.0149519	2.59	2.41	1.31	1.19
ENSMUSG00000121438	ENSMUSG00000121438	-0.719936	0.0498408	21.07	21.34	13.58	12.64
ENSMUSG00000033256	Shf	-0.719748	0.0766221	6.49	6.09	3.34	4.8
ENSMUSG00000026492	Tfb2m	-0.719722	0.000926515	8.95	8.06	5.26	5.26
ENSMUSG00000027243	Harbi1	-0.719246	0.00805719	6.31	5.94	4.16	3.33
ENSMUSG00000034793	G6pc3	-0.719016	0.00805064	9.67	11.21	7.03	5.63
ENSMUSG00000000731	Aire	-0.718465	0.00399095	9.87	13.29	6.64	7.96
ENSMUSG00000035397	Klf16	-0.71836	6.50796e-10	31.43	34.05	20.36	20.18
ENSMUSG00000028382	Ptbp3	-0.718338	8.9838e-08	13.66	13.49	7.46	9.48
ENSMUSG00000026097	Ormdl1	-0.718212	0.00103952	12.49	10.95	6.74	7.74
ENSMUSG00000035521	Gnptg	-0.717433	0.000404372	20.93	20.72	13.04	9.55
ENSMUSG00000040631	Dok4	-0.717284	0.0442849	3.37	3.31	1.82	2.33
ENSMUSG00000040482	Dxo	-0.717176	0.000179496	20.33	19.35	12.78	11.67
ENSMUSG00000001864	Aif1l	-0.717003	0.0283288	4.24	3.23	2.42	2.04
ENSMUSG00000035958	Tdp2	-0.716504	8.73047e-07	47.65	39.79	24.55	30.36
ENSMUSG00000061186	Sfmbt2	-0.716118	0.00680078	1.83	1.75	1.28	1.06
ENSMUSG00000026248	Mrpl44	-0.715301	9.52881e-07	37.49	35.29	22.56	22.53
ENSMUSG00000003458	Ncstn	-0.715009	1.41877e-08	24.74	25.26	16.41	14.61
ENSMUSG00000001674	Ddx18	-0.714659	4.97839e-16	105.66	101.43	62.12	66.32
ENSMUSG00000071604	Entrep1	-0.713832	0.0359342	3.85	3.66	1.99	2.66
ENSMUSG00000019868	Vta1	-0.713684	7.38677e-06	21.38	20.01	13.22	12.47
ENSMUSG00000019894	Slc6a15	-0.713396	0.042314	2.9	2.41	1.36	1.93
ENSMUSG00000055334	Snupn	-0.712511	0.000804538	18.44	16.31	10.57	10.99
ENSMUSG00000022617	Chkb	-0.712251	0.00832255	9.61	8.53	6.21	5.06
ENSMUSG00000040385	Ppp1ca	-0.711273	1.55868e-22	445.14	437.54	268.89	279.76
ENSMUSG00000049659	Aftph	-0.710974	3.14836e-05	7.83	8.09	4.89	5.01
ENSMUSG00000113506	Gm49377	-0.709032	0.224678	2.99	3.95	2.17	2.21
ENSMUSG00000036432	Siah2	-0.708732	0.137192	1.86	2.46	1.54	1.16
ENSMUSG00000046280	She	-0.708413	0.0512173	1.37	1.25	0.79	0.84
ENSMUSG00000121230	ENSMUSG00000121230	-0.708236	0.309797	1.3	1.36	0.6	1.05
ENSMUSG00000112288	Gm47879	-0.708084	0.748489	1.57	1.54	0.46	1.44
ENSMUSG00000059486	Kbtbd2	-0.707846	3.2839e-07	16.26	14.15	9.32	9.61
ENSMUSG00000071723	Gspt2	-0.707528	0.0069221	6.18	6.26	4.35	3.41
ENSMUSG00000029390	Tmed2	-0.70721	9.07935e-12	63.03	59.34	37.07	39.2
ENSMUSG00000071359	Tbpl1	-0.706842	0.000338852	8.61	9.16	6.13	7.1
ENSMUSG00000022312	Eif3h	-0.706212	5.09931e-18	274.79	269.68	164.55	175.04
ENSMUSG00000036291	Ap5m1	-0.705661	0.000621696	4.32	3.77	2.45	2.87
ENSMUSG00000036249	Rbm43	-0.70551	0.177228	2.2	2.04	1.31	1.33
ENSMUSG00000068327	Tlx2	-0.705426	0.30568	2.52	2.26	1.22	1.67
ENSMUSG00000029826	Zc3hav1	-0.704799	5.03485e-05	8.54	7.44	4.96	5.26
ENSMUSG00000002496	Tsc2	-0.704695	6.71123e-10	22.06	22.78	15.16	12.55
ENSMUSG00000036513	Commd2	-0.704546	5.7184e-06	13.25	13.4	8.44	8.21
ENSMUSG00000066232	Ipo7	-0.70397	1.70028e-11	61.06	57.6	33.28	40.87
ENSMUSG00000021732	Fgf10	-0.703247	0.0864005	1.57	1.74	0.84	1.23
ENSMUSG00000097290	1300002E11Rik	-0.70317	0.144048	5.64	4.38	2.48	3.04
ENSMUSG00000042743	Sgtb	-0.702928	0.0692143	2.47	2.19	1.39	1.52
ENSMUSG00000028771	Ptpn12	-0.702708	2.80739e-05	10.54	10.01	6.49	6.36
ENSMUSG00000002455	Prpf6	-0.702299	3.61844e-13	49.89	50.6	32.6	30.3
ENSMUSG00000064267	Hvcn1	-0.702039	0.00413966	5.62	6.83	3.86	3.97
ENSMUSG00000030034	Ino80b	-0.701363	1.07659e-05	37.12	40.16	22.44	19.47
ENSMUSG00000055407	Map6	-0.70083	0.00388192	5.72	5.3	3.14	3.2
ENSMUSG00000023942	Slc29a1	-0.700757	2.39832e-15	116.47	124.51	76.04	74.46
ENSMUSG00000097919	Gm27021	-0.700346	0.37182	3.37	5.67	3.54	2.15
ENSMUSG00000038214	Bend3	-0.70004	1.13734e-07	9.85	10.8	6.11	6.79
ENSMUSG00000036299	BC031181	-0.699977	1.05877e-06	68.01	64.44	37.67	46.23
ENSMUSG00000120430	ENSMUSG00000120430	-0.699878	0.124998	5.74	6.86	3.46	4.39
ENSMUSG00000030534	Vps33b	-0.699726	0.000588175	9.26	8.89	5.46	5.9
ENSMUSG00000029860	Zyx	-0.699379	2.89537e-07	25.72	26.52	17.86	15.27
ENSMUSG00000046572	Zfp518b	-0.699175	4.71285e-07	9.84	10.36	5.66	7.01
ENSMUSG00000026032	Ndufb3	-0.698918	9.15744e-07	116.17	99.45	70.53	64.36
ENSMUSG00000081254	Gm12112	-0.698632	0.781743	0	53.07	16.38	19.59
ENSMUSG00000032583	Mon1a	-0.698526	0.0756436	3.14	3.58	2.22	1.98
ENSMUSG00000032366	Tpm1	-0.698518	2.35658e-09	69.8	61.4	37.02	42.05
ENSMUSG00000042608	Stk40	-0.698188	3.88531e-08	19.52	18.85	12.59	11.51
ENSMUSG00000022945	Chaf1b	-0.698014	8.15862e-10	47.24	49.85	30.33	30.62
ENSMUSG00000022706	Mrpl40	-0.697705	1.63412e-05	51.52	53.49	27.85	35.15
ENSMUSG00000024837	Dmrt1	-0.697467	0.0594907	3.99	3.63	2.72	1.94
ENSMUSG00000025738	Fbxl16	-0.696166	0.176217	1.16	1.3	0.73	0.84
ENSMUSG00000019338	Zfp687	-0.693534	1.29568e-07	12.32	13.02	7.84	8.12
ENSMUSG00000078154	Gm12184	-0.692943	0.138247	3.93	5.94	3	3.29
ENSMUSG00000019850	Tnfaip3	-0.692667	0.109081	1.36	1.29	0.72	0.94
ENSMUSG00000030693	Klk10	-0.692277	0.0101933	11.04	12.16	8	6.63
ENSMUSG00000022722	Arl6	-0.692265	0.00846954	11.06	8.77	6.25	6.62
ENSMUSG00000023883	Phf10	-0.6921	5.27818e-05	20.92	22.75	13.38	14.14
ENSMUSG00000075467	Dnlz	-0.690965	0.000140742	11.24	10.43	7.37	6.29
ENSMUSG00000025001	Hells	-0.690953	2.37644e-09	61.44	54.36	31.92	41.09
ENSMUSG00000057788	Ddx49	-0.690947	6.36986e-13	84.77	83.12	55.5	50.38
ENSMUSG00000060288	Ppih	-0.690301	8.76517e-07	93.9	82.11	54.35	49.81
ENSMUSG00000029634	Rnf6	-0.689325	0.000108231	10.52	10.78	6.78	6.41
ENSMUSG00000069678	Pcgf1	-0.688631	0.0160536	16.77	17.76	11.45	10.06
ENSMUSG00000055027	Smyd1	-0.687441	0.158792	1.64	1.43	0.78	1.16
ENSMUSG00000053414	Hunk	-0.687259	0.00204296	3.4	4.09	2.47	2.27
ENSMUSG00000030800	Prss8	-0.687062	0.0727348	4.2	4.05	2.64	2.53
ENSMUSG00000052133	Sema5b	-0.68705	0.000458921	5.42	6.05	3.43	3.85
ENSMUSG00000040429	Mterf1a	-0.686639	0.192297	3.06	3.51	2.17	2.06
ENSMUSG00000027551	Zfp64	-0.686482	1.4942e-10	54.23	50.01	33.35	31.49
ENSMUSG00000020387	Jade2	-0.686375	0.0014838	3.31	3.04	1.95	2.07
ENSMUSG00000024976	Shoc2	-0.686183	9.56796e-05	8.48	7.96	4.81	5.48
ENSMUSG00000025132	Arhgdia	-0.686018	1.76714e-20	420.64	438.53	278.9	264.36
ENSMUSG00000040034	Nup43	-0.685971	1.03882e-07	67.06	60.03	38.38	41.93
ENSMUSG00000028955	Vamp3	-0.685417	9.42435e-05	18.13	16.62	9.98	11.99
ENSMUSG00000078864	Gm14322	-0.68533	0.446508	2.03	1.92	0.99	1.51
ENSMUSG00000032024	Clmp	-0.683935	0.000382751	6.31	5.82	3.8	3.87
ENSMUSG00000040703	Cyp2s1	-0.683785	0.00398268	6.42	6.02	3.97	3.83
ENSMUSG00000047123	Ticam1	-0.683345	0.0656127	2.81	2.71	2.05	1.45
ENSMUSG00000055760	Gemin6	-0.682741	2.13299e-05	38.52	39.15	23.93	25.3
ENSMUSG00000089726	Mir17hg	-0.682733	0.0147887	3.54	3.94	2.12	2.63
ENSMUSG00000032202	Rab27a	-0.682285	0.000710999	8.37	7.55	4.96	5.25
ENSMUSG00000031949	Adat1	-0.682003	1.53162e-05	13.05	13.15	8.88	7.88
ENSMUSG00000060989	Gm11847	-0.681811	0.402346	2.49	2.47	2.15	0.95
ENSMUSG00000084990	Gm14549	-0.681214	0.570267	1.31	1.19	0.89	0.7
ENSMUSG00000022177	Haus4	-0.68092	2.35704e-10	77.13	81.05	47.95	52.48
ENSMUSG00000024286	Ccny	-0.680736	2.02651e-07	12.74	12.09	6.89	7.78
ENSMUSG00000026021	Sumo1	-0.680559	6.38972e-07	146.8	122.41	74.11	96.71
ENSMUSG00000017999	Ddx27	-0.680429	1.18009e-16	104.08	104.71	65.48	67.93
ENSMUSG00000120263	ENSMUSG00000120263	-0.679476	0.7243	2.11	1.52	0.94	1.35
ENSMUSG00000074088	Snrnp40	-0.678623	3.83917e-14	135.38	135.24	88.52	83.57
ENSMUSG00000049739	Zfp646	-0.678588	3.15365e-08	10.75	11.57	7.2	7.01
ENSMUSG00000109274	Gm45133	-0.678281	2.92545e-05	12.77	13.03	8.18	8.23
ENSMUSG00000058240	Cryzl1	-0.678181	0.00446925	12.13	12.33	8.77	9.52
ENSMUSG00000056832	Ttc26	-0.678087	0.00416162	4.11	4.49	2.47	3
ENSMUSG00000022890	Atp5j	-0.677922	5.52468e-12	233.57	224.85	140.96	149.6
ENSMUSG00000023951	Vegfa	-0.67739	0.0484524	2.88	4.05	2.43	1.92
ENSMUSG00000028907	Utp11	-0.676725	5.56092e-06	44.07	38.66	23.69	28.92
ENSMUSG00000059423	Zfp933	-0.676276	0.0413099	2.3	2.02	1.34	1.41
ENSMUSG00000041774	Ydjc	-0.676145	0.000343734	20.54	24.36	15.12	13.76
ENSMUSG00000114926	Gm2379	-0.675979	0.0299845	6.06	5.73	3.22	4.1
ENSMUSG00000016833	Mrps18c	-0.675923	2.57254e-05	124.05	109.31	80.87	77.84
ENSMUSG00000066637	Ttc32	-0.675598	0.232913	4.33	5.18	2.55	3.47
ENSMUSG00000012422	Tmem167	-0.675358	1.63797e-07	8	7.2	4.82	4.88
ENSMUSG00000053012	Krcc1	-0.67499	0.0270893	9.3	8.6	4.43	7.17
ENSMUSG00000005718	Tfap4	-0.674936	0.000137388	14.59	14.58	9.9	8.71
ENSMUSG00000049073	Or8d4	-0.673355	0.401463	2.24	1.96	1.54	1.19
ENSMUSG00000030871	Ears2	-0.673301	0.00202175	10.06	10.25	6.33	6.64
ENSMUSG00000024480	Ap3s1	-0.672862	0.000222076	23.58	21.35	13.37	15.3
ENSMUSG00000066571	Garre1	-0.671612	2.1135e-06	13.96	12.76	9.27	7.31
ENSMUSG00000078875	Gm14419	-0.671331	0.144048	5.94	5.76	3.3	3.54
ENSMUSG00000024095	Hnrnpll	-0.671212	3.6407e-10	33.89	33.1	21	21.4
ENSMUSG00000000295	Hddc2	-0.670945	0.00659092	27.31	29.94	15.43	21.15
ENSMUSG00000034165	Ccnd3	-0.670798	3.12977e-15	132.44	138.54	86.13	86.72
ENSMUSG00000037353	Letmd1	-0.670426	0.0686286	3.7	3.7	2.24	2.11
ENSMUSG00000051855	Mest	-0.670407	6.97501e-14	103.33	94.27	61.69	64.7
ENSMUSG00000024854	Pold4	-0.670229	0.307465	3.93	4.38	2.36	2.82
ENSMUSG00000021660	Btf3	-0.670036	1.2738e-16	705.03	701.17	408.65	455.24
ENSMUSG00000042178	Armc5	-0.669498	0.000130613	8.5	8.62	5.91	5.06
ENSMUSG00000061991	H2ac10	-0.669257	0.68001	1.6	8.49	4.58	2.5
ENSMUSG00000029073	Cptp	-0.668571	0.0309355	4.02	4.19	2.89	2.38
ENSMUSG00000054874	Pcnx3	-0.668401	7.82655e-09	15.92	18.56	11.15	10.72
ENSMUSG00000100691	2010320M18Rik	-0.66828	0.0940046	8.38	7.74	4.3	6
ENSMUSG00000026483	Niban1	-0.667353	6.215e-09	12	12.39	7.79	7.85
ENSMUSG00000034951	Cog7	-0.667342	2.68255e-06	17.12	16.68	11	10.67
ENSMUSG00000023411	Nfatc4	-0.666908	0.000360771	7.74	9.13	5.31	5.6
ENSMUSG00000027854	Sike1	-0.666852	1.67573e-05	13.73	14.85	9.75	7.83
ENSMUSG00000029507	Pus1	-0.666496	3.33257e-08	53.7	52.38	36.09	32.42
ENSMUSG00000012483	Rpa3	-0.666353	2.68379e-07	178.96	155.64	101.4	112.63
ENSMUSG00000023952	Gtpbp2	-0.666065	0.00043811	9.67	9.93	6.88	5.71
ENSMUSG00000020333	Acsl6	-0.665519	0.0906285	2.6	2.26	1.62	1.39
ENSMUSG00000038646	Ramac	-0.663905	3.88056e-05	44.75	37.21	23.66	28.92
ENSMUSG00000025269	Apex2	-0.663855	0.00153621	12.88	11.47	8.3	6.59
ENSMUSG00000061759	Armt1	-0.663766	2.05942e-06	21.43	20.2	13.32	13.29
ENSMUSG00000054716	Zfp771	-0.663661	5.77353e-05	26.82	26.86	18.04	16.46
ENSMUSG00000035248	Tut7	-0.662824	1.97617e-05	9.14	8.46	5.37	6.18
ENSMUSG00000042377	Fam83g	-0.662661	0.0245767	2.33	2.3	1.55	1.42
ENSMUSG00000035845	Alg12	-0.662473	0.00829138	7.77	8.15	5.42	4.82
ENSMUSG00000078952	Lncenc1	-0.662247	9.92002e-14	78.67	74.19	49.34	49.23
ENSMUSG00000029560	Snx8	-0.661663	3.1815e-05	14.82	16.56	10.27	9.93
ENSMUSG00000020253	Ppm1m	-0.660758	0.00056526	14.77	16.03	10.35	9.49
ENSMUSG00000060279	Ap2a1	-0.660642	5.61577e-13	55.44	58.35	37.75	35.73
ENSMUSG00000041684	Bivm	-0.660519	0.0109144	3.98	3.97	2.66	2.49
ENSMUSG00000024939	Fam89b	-0.660428	0.0200268	11.69	14.32	8.91	7.83
ENSMUSG00000059714	Flot1	-0.65988	0.00151355	13.71	15.57	8.86	9.17
ENSMUSG00000031198	Fundc2	-0.659609	6.07071e-05	15.4	13.95	9.66	9.24
ENSMUSG00000040195	Nemp1	-0.659597	5.78048e-05	8.24	8.02	5.57	5.96
ENSMUSG00000033961	Zfp446	-0.658882	0.0127061	3.86	4.04	2.53	2.77
ENSMUSG00000053768	Chchd3	-0.658189	1.91231e-09	80.89	75	48.23	52.29
ENSMUSG00000061981	Flot2	-0.65804	3.34883e-08	32.54	36.19	22.91	21.5
ENSMUSG00000085327	Gm16104	-0.657438	0.431636	7.92	8.51	6.38	4.18
ENSMUSG00000068566	Myadm	-0.657411	4.39407e-12	50.88	50.17	32.85	32.82
ENSMUSG00000059669	Taf1b	-0.657388	0.0016019	11.44	10.94	6.97	6.73
ENSMUSG00000024587	Nars	-0.656965	2.20694e-16	178.49	175.64	111.31	119.36
ENSMUSG00000086537	Gnasas1	-0.65685	0.210204	1.95	1.9	1.18	1.3
ENSMUSG00000000732	Icosl	-0.655277	0.000841936	8.57	9.31	5.84	5.73
ENSMUSG00000071528	Atp5md	-0.65448	3.05602e-08	651.64	612.56	397.39	413.56
ENSMUSG00000032393	Dpp8	-0.654455	0.000546481	5.66	5.29	3.64	3.4
ENSMUSG00000000827	Tpd52l2	-0.654242	6.63515e-09	54.36	50.43	29.2	35.15
ENSMUSG00000050619	Zscan29	-0.654188	0.0279613	3.16	3.41	2.23	1.87
ENSMUSG00000032714	Syde1	-0.653838	0.0344478	3.08	3.45	2.25	1.98
ENSMUSG00000099923	1700105P06Rik	-0.653763	0.426857	1.4	1.16	1.12	0.55
ENSMUSG00000029470	P2rx4	-0.65373	0.0218997	5.89	6.62	4.94	3.96
ENSMUSG00000052727	Map1b	-0.653434	0.000977869	2.32	2.7	1.43	1.82
ENSMUSG00000028833	Ncdn	-0.653428	4.71285e-07	16.48	16.88	10.62	10.85
ENSMUSG00000029022	Miip	-0.652828	9.98003e-06	25.96	27.84	17.45	17.41
ENSMUSG00000071064	Zfp827	-0.652582	0.0334219	1.59	1.52	0.87	1.06
ENSMUSG00000054871	Tmem158	-0.652455	0.432338	1.09	1.41	0.87	0.75
ENSMUSG00000022141	Nipbl	-0.651347	4.17152e-06	6.85	7.28	4.08	5.08
ENSMUSG00000005882	Uqcc1	-0.650995	1.57507e-06	29.3	24.86	13.93	14.29
ENSMUSG00000020608	Smc6	-0.650398	3.37865e-06	14.53	13.5	8.12	10.2
ENSMUSG00000021371	Mcur1	-0.650023	0.141587	1.39	1.36	1.06	0.72
ENSMUSG00000022003	Slc25a30	-0.649983	0.00450479	5.71	4.87	3.39	3.47
ENSMUSG00000003824	Syce2	-0.649885	1.00959e-06	46.02	48.9	27.8	34.12
ENSMUSG00000028300	C9orf72	-0.649748	0.0314375	3.5	3.88	2.18	2.62
ENSMUSG00000044065	Gm9788	-0.649733	0.537996	1.37	2.8	1.44	1.32
ENSMUSG00000027944	Hax1	-0.649239	1.98203e-09	111.49	105.59	69.14	72.09
ENSMUSG00000017723	Wfdc2	-0.649101	0.000117619	79.17	96.61	60.22	61.48
ENSMUSG00000041729	Coro2b	-0.648978	0.00577105	4.9	5.44	3.04	3.67
ENSMUSG00000030707	Coro1a	-0.648907	0.123521	4.72	3.73	3	2.48
ENSMUSG00000038515	Grtp1	-0.648685	8.10299e-06	43.35	43.59	28	25.35
ENSMUSG00000015094	Npdc1	-0.648639	0.00494023	13.72	14.27	9.82	8.38
ENSMUSG00000117975	Itprip	-0.648312	0.153742	1.6	1.29	0.93	0.95
ENSMUSG00000069089	Cdk7	-0.647443	1.41179e-06	52.83	45.59	30.03	33.51
ENSMUSG00000024525	Impa2	-0.647415	2.21378e-11	31.45	32.99	20.07	21.82
ENSMUSG00000089715	Cbx6	-0.646942	8.6917e-08	13.39	13.65	8.96	8.27
ENSMUSG00000033998	Kcnk1	-0.646924	0.155673	2.86	2.58	2.1	1.62
ENSMUSG00000096544	Gm4617	-0.646447	0.522875	14.77	19.62	7.43	14.88
ENSMUSG00000048039	Isg20l2	-0.646354	1.34376e-10	44.34	45.57	30.07	28.43
ENSMUSG00000018446	C1qbp	-0.64573	9.10393e-15	328.45	323.67	202.73	221.32
ENSMUSG00000022849	Hspbap1	-0.645237	4.3089e-10	72.67	75.83	49.12	47.56
ENSMUSG00000019362	D8Ertd738e	-0.644837	2.98222e-10	318.31	303.31	206.08	197.64
ENSMUSG00000025485	Ric8a	-0.644712	1.74529e-06	17.33	17.01	11.76	10.61
ENSMUSG00000062031	Pgghg	-0.643564	0.00205913	7.83	7.23	4.67	5.14
ENSMUSG00000039617	Gm7488	-0.643315	0.419843	4.5	5.63	2.26	4.55
ENSMUSG00000020448	Rnf185	-0.642514	6.30978e-06	21.25	18.75	13.49	12.59
ENSMUSG00000042831	Alkbh6	-0.642044	0.000841936	31.75	35.5	22.14	21.77
ENSMUSG00000038459	Abhd17c	-0.641759	1.5603e-05	20.68	22.92	14.09	14.38
ENSMUSG00000033313	Fbxl8	-0.641654	0.358096	1.55	1.39	1.05	0.86
ENSMUSG00000026833	Olfm1	-0.641194	0.344637	1.53	1.98	0.83	1.04
ENSMUSG00000023018	Smarcd1	-0.640457	2.05514e-13	63.08	64.65	40.96	42.33
ENSMUSG00000031634	Ufsp2	-0.640165	0.00390488	17.01	13.18	9.72	9.96
ENSMUSG00000053175	Bcl3	-0.640049	4.42916e-06	30.68	30.73	20.98	19.15
ENSMUSG00000073436	Eme2	-0.639671	0.128876	1.88	1.79	1.22	0.66
ENSMUSG00000030726	Pold3	-0.639435	1.90172e-09	39.61	38.94	24.26	26.98
ENSMUSG00000055681	Cope	-0.639149	2.462e-10	113.74	119.35	78.22	74.14
ENSMUSG00000030521	Mphosph10	-0.638936	3.23645e-07	43.46	38.34	25.08	28.35
ENSMUSG00000027433	Xrn2	-0.638461	4.45042e-11	50.56	46.31	30.97	32.36
ENSMUSG00000020032	Nuak1	-0.63839	0.0524157	1.59	1.65	1.05	1.07
ENSMUSG00000053038	Gm6180	-0.638259	0.716399	2.32	1.89	1.4	1.55
ENSMUSG00000054128	H2-T3	-0.637999	0.254574	1.98	1.99	0.9	1.7
ENSMUSG00000034024	Cct2	-0.637971	2.67472e-18	400.55	382.26	253.22	261.28
ENSMUSG00000027001	Dusp19	-0.637801	0.1324	4.07	4.23	3.02	2.42
ENSMUSG00000056917	Sipa1	-0.637784	0.00177507	7.09	8.41	5.74	4.82
ENSMUSG00000023235	Ccl25	-0.637688	0.238855	5.84	5.97	2.51	5.09
ENSMUSG00000054942	Miga1	-0.637595	5.69837e-06	11.57	12.39	8.14	8.87
ENSMUSG00000000171	Sdhd	-0.637546	1.85061e-12	170.91	169.03	113.31	109.04
ENSMUSG00000073155	1810058I24Rik	-0.637092	9.59171e-08	82.44	87.66	60.51	64.03
ENSMUSG00000027298	Tyro3	-0.636853	3.62589e-06	18.91	22.39	12.42	14.61
ENSMUSG00000027428	Rbbp9	-0.636691	0.000991282	12.45	12.76	7.73	8.77
ENSMUSG00000020476	Dbnl	-0.635663	6.19342e-11	70.38	69.15	44.69	44.29
ENSMUSG00000003623	Crot	-0.635596	0.00159727	9.44	8.48	5.28	6.45
ENSMUSG00000026078	Pdcl3	-0.635594	3.30023e-07	17.26	16.62	11.07	11.13
ENSMUSG00000029994	Anxa4	-0.635273	0.00137822	13.2	12.81	8.01	9.02
ENSMUSG00000062518	Zfp534	-0.63524	0.000590068	13.89	10.97	7.71	8.54
ENSMUSG00000032482	Cspg5	-0.635021	0.304635	1.51	1.26	0.75	1.01
ENSMUSG00000022552	Sharpin	-0.635019	0.00940344	10.72	11.43	8.13	6.42
ENSMUSG00000118663	Spata5l1	-0.635019	0.00573474	8.23	7.73	5.09	5.37
ENSMUSG00000024036	Slc37a1	-0.634998	0.000331139	9.82	10.77	6.78	6.75
ENSMUSG00000066148	Prpf4	-0.634873	6.23258e-10	20.97	21.31	13.78	13.95
ENSMUSG00000038781	Stap2	-0.63484	0.365549	1.63	2.67	1.7	1.13
ENSMUSG00000045699	Gm21411	-0.63477	0.00828187	14.33	15.17	9.39	9.99
ENSMUSG00000074170	Plekhf1	-0.6339	0.0153497	2.94	2.53	1.87	1.71
ENSMUSG00000062327	T	-0.63365	0.144504	3.19	2.89	2.16	1.83
ENSMUSG00000029910	Mad2l1	-0.633637	1.26326e-11	92.01	85.25	59.37	62.55
ENSMUSG00000036751	Cox6b1	-0.633351	1.39017e-12	538.98	515.31	352.84	339.22
ENSMUSG00000101523	Csnk2a1-ps3	-0.633349	0.255034	1.92	1.34	0.94	1.19
ENSMUSG00000032846	Zswim6	-0.633238	0.0975597	1.4	1.28	0.93	0.83
ENSMUSG00000005069	Pex5	-0.632722	3.32363e-11	47.66	47.66	30.77	31.89
ENSMUSG00000023262	Acy1	-0.632658	0.000137388	24.91	26.79	16.59	17.5
ENSMUSG00000017801	Mlx	-0.632332	1.13307e-05	28.54	26.99	17.96	18.71
ENSMUSG00000022035	Ccdc25	-0.632244	1.09346e-06	30.95	28.49	19.27	19.74
ENSMUSG00000040904	Gm21988	-0.631604	0.15349	3.76	4.06	2.31	2.84
ENSMUSG00000070348	Ccnd1	-0.631587	2.17174e-13	60.68	59.34	40.33	38.56
ENSMUSG00000010760	Phlda2	-0.631296	0.000304868	59.06	59.27	40.99	36.69
ENSMUSG00000015092	Edf1	-0.63109	1.146e-09	224.49	230.2	152.06	146.42
ENSMUSG00000033036	Gm7879	-0.631065	0.684759	1.24	1.34	0.69	0.95
ENSMUSG00000042367	Gjb3	-0.630917	4.63104e-09	86.56	98.54	62.38	59.44
ENSMUSG00000085860	2410003L11Rik	-0.630108	0.00218357	15.88	14.89	9.77	10.42
ENSMUSG00000002833	Hdgfl2	-0.629962	5.61095e-12	77.45	76.6	51.14	50.18
ENSMUSG00000039774	Galnt12	-0.628473	0.023825	6.1	5.66	4.13	3.62
ENSMUSG00000028392	Bspry	-0.628446	0.00122342	14.89	13.81	10.46	8.33
ENSMUSG00000027860	Vangl1	-0.628334	7.24178e-08	12.12	11.58	7.9	7.72
ENSMUSG00000078954	Arhgap8	-0.627707	0.100474	6.49	5.12	3.63	4.01
ENSMUSG00000024055	Cyp4f13	-0.626578	0.0711354	5.88	4.98	3.74	3.46
ENSMUSG00000024807	Syvn1	-0.626356	9.66768e-05	13.09	14.27	9.48	8.08
ENSMUSG00000053613	Notumos	-0.626252	0.208108	1.63	1.99	1.18	1.21
ENSMUSG00000040659	Efhd2	-0.625155	0.00737871	7.49	9.06	5.58	5.36
ENSMUSG00000025521	Tmem192	-0.624738	4.56587e-05	43.91	46.64	29.53	29.71
ENSMUSG00000043889	Gm8399	-0.62468	0.588654	1.09	1.67	1.26	0.59
ENSMUSG00000021871	Gm49342	-0.624477	0.000283511	73.74	71.01	52.8	42.71
ENSMUSG00000038545	Cul7	-0.624282	3.63797e-08	22.8	25.03	17.05	14.57
ENSMUSG00000018166	Erbb3	-0.623897	3.07304e-06	10.07	10.94	6.54	7.35
ENSMUSG00000110949	Nudt8	-0.623754	0.107687	11.45	17.19	9.49	9.44
ENSMUSG00000032726	Bmp8a	-0.622823	0.223203	2.08	2.39	1.42	1.5
ENSMUSG00000013662	Atad1	-0.622537	5.92069e-05	17.84	15.81	9.86	12.44
ENSMUSG00000027466	Rbck1	-0.622239	8.02224e-08	41.91	46.29	31.58	29.01
ENSMUSG00000027823	Gmps	-0.622139	1.83319e-08	15.24	14.47	9.12	10.52
ENSMUSG00000002477	Snrpd1	-0.62171	8.04557e-11	253.8	233.86	159.91	162.15
ENSMUSG00000004996	Mri1	-0.621085	9.15398e-08	29.72	30.96	20.7	19.48
ENSMUSG00000021072	Tmx1	-0.620985	0.00104309	11.26	9.9	7.45	6.55
ENSMUSG00000002393	Nr2f6	-0.620775	0.000258583	15.86	18.4	11.47	11.23
ENSMUSG00000092417	Gpank1	-0.619645	0.00324726	18.62	18.33	14.3	11.29
ENSMUSG00000030499	Kctd15	-0.619402	0.0407264	4.45	5.18	3.12	3.27
ENSMUSG00000002274	Metrn	-0.619363	0.00173762	25.13	28.05	14.45	18.9
ENSMUSG00000078872	Gm14401	-0.619315	0.435532	3.37	2.56	2.32	4.03
ENSMUSG00000033249	Hsf4	-0.619007	0.489883	1.51	1.11	0.87	0.71
[truncated: 9,965 more rows]

## Sheet: GABPB1_12h_RNA
Table S1. Differentially expressed genes in mESCs with GABPB1 degradation for 12 hours (dTAG vs DMSO).
Gene_id	Gene_name	log2FoldChange	padj	DMSO_Rep1	DMSO_Rep2	dTAG_Rep1	dTAG_Rep2
ENSMUSG00000028670	Lypla2	-2.88673	2.57899e-101	33.94	30.53	4.16	4.7
ENSMUSG00000043251	Exoc3l	-2.17601	3.11926e-17	4.32	4.3	0.99	0.94
ENSMUSG00000113149	Gm49383	-2.03859	1.26728e-06	4.93	4.3	1.06	1.24
ENSMUSG00000025272	Tro	-1.65555	1.32905e-33	5.35	4.98	1.88	1.58
ENSMUSG00000014763	Fam120b	-1.65042	1.16494e-08	1.63	1.8	0.56	0.55
ENSMUSG00000031066	Usp11	-1.64438	2.05448e-51	15.17	15.74	5.41	4.68
ENSMUSG00000030727	Rabep2	-1.60402	1.13859e-34	16.35	16.66	5.17	5.83
ENSMUSG00000040280	Ndufa4l2	-1.59745	0.000588826	4.41	6.1	1.71	1.83
ENSMUSG00000083405	Gm15725	-1.58955	0.000813323	3.76	4.66	1.73	1.13
ENSMUSG00000051735	Rinl	-1.57198	1.57061e-39	13.86	14.08	4.75	4.82
ENSMUSG00000050846	Zfp623	-1.56344	5.27457e-10	4.04	4.3	1.56	1.32
ENSMUSG00000031617	Tmem184c	-1.55009	7.52935e-33	12.71	12.88	4.38	4.52
ENSMUSG00000031897	Psmb10	-1.54235	3.75451e-09	9.44	7.76	3.06	2.95
ENSMUSG00000020973	Dnaaf2	-1.53547	2.10552e-08	2.35	2.75	0.91	0.89
ENSMUSG00000044551	9930012K11Rik	-1.52947	0.000484553	2.09	2.41	0.97	0.62
ENSMUSG00000033488	Cryzl2	-1.49663	0.0020806	2.49	2.49	0.8	0.87
ENSMUSG00000024896	Minpp1	-1.43683	1.85716e-26	12.14	12.58	4.9	4.43
ENSMUSG00000034786	Gpsm3	-1.41771	1.04321e-05	5.91	5.25	2.06	2.18
ENSMUSG00000049957	Ccdc137	-1.40074	5.22953e-20	9.07	9.08	3.29	3.7
ENSMUSG00000028023	Pitx2	-1.39724	0.00417854	2.18	2.06	1.12	0.57
ENSMUSG00000064023	Klk8	-1.35625	3.41979e-10	11.55	10.93	4.69	4.27
ENSMUSG00000056592	Zfp658	-1.34151	0.000124374	1.63	2.01	0.59	0.96
ENSMUSG00000078931	Pdf	-1.33218	2.64955e-10	15.35	13.92	6.97	4.89
ENSMUSG00000017493	Igfbp4	-1.33033	3.47102e-10	4.34	5.17	1.5	1.45
ENSMUSG00000058706	0610030E20Rik	-1.32202	5.21672e-14	4.02	4.29	1.85	1.55
ENSMUSG00000030036	Mogs	-1.3123	4.83371e-41	20.32	20.8	8.51	8.36
ENSMUSG00000116138	C030006K11Rik	-1.30905	0.000262397	4.19	3.07	1.43	1.55
ENSMUSG00000003382	Etv3	-1.30548	1.06007e-14	5.29	4.6	2.31	1.85
ENSMUSG00000112690	Gm2446	-1.30471	0.857864	4.7	5.82	0	4.28
ENSMUSG00000027207	Galk2	-1.27333	1.268e-15	12.27	12.6	4.9	5.42
ENSMUSG00000028322	Exosc3	-1.24586	1.75109e-21	36.21	36.81	15.38	15.95
ENSMUSG00000050914	Ankrd37	-1.22043	0.00391528	5.5	7.71	3.3	2.48
ENSMUSG00000041845	Rhod	-1.19067	0.00027291	5.5	5.08	2.66	2.17
ENSMUSG00000031021	Tmem9b	-1.18634	0.0172744	1.91	2.3	0.9	0.99
ENSMUSG00000046879	Irgm1	-1.18023	0.0218256	1.33	1.91	0.67	0.81
ENSMUSG00000029513	Prkab1	-1.17684	6.49268e-34	29.1	29.48	12.86	13.48
ENSMUSG00000038812	Trmt112	-1.1708	8.25289e-30	69.7	68.85	30.05	32.39
ENSMUSG00000067847	Romo1	-1.15025	2.71326e-07	54.08	45.91	23.33	24.85
ENSMUSG00000032308	Ulk3	-1.13621	0.000119771	2.78	2.62	1.37	1.14
ENSMUSG00000051457	Spn	-1.1296	2.19773e-07	3.42	3.27	1.7	1.42
ENSMUSG00000074405	Zfp865	-1.12727	4.88864e-22	11.08	10.22	5.21	4.55
ENSMUSG00000081309	Gm12397	-1.12029	0.00626766	12.82	13.28	5.17	7.05
ENSMUSG00000024592	C330018D20Rik	-1.11757	0.0167655	1.53	1.56	0.68	0.77
ENSMUSG00000035498	Cdcp1	-1.11196	0.000180013	1.5	1.38	0.58	0.78
ENSMUSG00000031165	Was	-1.11012	0.0337595	1.75	1.49	0.62	0.9
ENSMUSG00000038793	Lefty1	-1.10477	2.23751e-27	37.78	39.87	17.34	19.42
ENSMUSG00000014873	Surf2	-1.0969	3.54525e-12	22.55	25.46	10.75	12.11
ENSMUSG00000027618	Nfs1	-1.08729	8.94031e-17	18.72	18.25	9.01	9.13
ENSMUSG00000001285	Myg1	-1.08513	3.25105e-22	31.9	31.97	15.03	15.64
ENSMUSG00000024953	Prdx5	-1.08448	6.61745e-21	43.07	41.55	21.15	23.44
ENSMUSG00000024414	Mrpl27	-1.06141	9.74243e-14	55.91	51.07	25.52	26.57
ENSMUSG00000002763	Pex6	-1.05295	1.24685e-23	15.6	14.76	7.68	7.23
ENSMUSG00000041231	Ublcp1	-1.03275	3.56899e-24	24.83	24.91	12.46	12.33
ENSMUSG00000008153	Clstn3	-1.03137	1.10841e-31	18.15	17.96	9.82	8.5
ENSMUSG00000089872	Rps6kc1	-1.0306	4.82329e-09	4.51	5.36	2.33	2.59
ENSMUSG00000047238	Mageh1	-1.01483	0.0143459	4.32	4.67	2.94	1.61
ENSMUSG00000030127	Cops7a	-0.998671	2.09473e-54	87.74	90.61	45.63	47.97
ENSMUSG00000073684	Faap20	-0.996828	5.54813e-08	18.53	17.76	9.16	9.82
ENSMUSG00000047866	Lonp2	-0.995687	1.27764e-16	15.04	15.79	7.96	7.9
ENSMUSG00000020263	Appl2	-0.994509	3.09524e-09	6.59	7.15	3.77	3.27
ENSMUSG00000025161	Slc16a3	-0.99275	1.90841e-52	58.47	63.8	31.86	30.91
ENSMUSG00000005125	Ndrg1	-0.99085	1.04662e-08	6.36	7.44	3.52	3.56
ENSMUSG00000062995	Ica1	-0.983829	0.0410125	1.86	2.08	1.25	0.93
ENSMUSG00000028467	Gba2	-0.98268	1.76239e-13	8.75	9.48	5.03	4.39
ENSMUSG00000020455	Trim11	-0.977978	1.53392e-19	17.13	18.76	9.22	9.26
ENSMUSG00000073982	Rhog	-0.969832	0.00345904	7.31	6.18	4.18	2.85
ENSMUSG00000054676	1600014C10Rik	-0.966717	0.00253304	2.85	3.83	2.41	1.59
ENSMUSG00000031785	Adgrg1	-0.964428	0.00303681	1.66	1.89	0.94	0.92
ENSMUSG00000046410	Kcnk6	-0.959567	0.000704888	1.99	1.85	0.99	1.03
ENSMUSG00000046096	Mosmo	-0.958879	6.46909e-08	8.49	8.32	4.41	3.82
ENSMUSG00000091803	Cox16	-0.957168	0.00117773	19.44	20.62	9.03	10.95
ENSMUSG00000025956	Mettl21a	-0.949221	0.00352564	3.19	3.52	1.51	1.99
ENSMUSG00000031934	Panx1	-0.948945	8.46628e-05	1.66	1.87	0.93	0.94
ENSMUSG00000015942	Gtf2ird2	-0.948473	0.0111489	1.55	1.42	0.82	0.75
ENSMUSG00000108815	Gm49388	-0.941463	1.52558e-06	4.3	3.23	2.18	1.82
ENSMUSG00000032860	P2ry2	-0.935877	0.00507293	2.23	2.87	1.19	1.54
ENSMUSG00000024349	Sting1	-0.934327	0.0394055	2.05	2.3	0.85	1.49
ENSMUSG00000018919	Tm4sf5	-0.931482	0.0704582	4.25	4.11	2.28	2.18
ENSMUSG00000066652	Lefty2	-0.924656	1.17939e-84	176.28	180.08	91.57	99.63
ENSMUSG00000042759	Apobr	-0.917636	0.00971588	1.54	1.72	0.76	1.09
ENSMUSG00000054312	Mrps21	-0.913869	7.85062e-08	124.94	124.43	66.63	62.93
ENSMUSG00000070610	Gm13127	-0.913096	0.0194461	3.98	4.36	2.49	2.05
ENSMUSG00000021611	Tert	-0.90681	3.14571e-11	6.26	6.42	3.55	3.35
ENSMUSG00000031875	Cmtm3	-0.905226	0.00103336	6.14	6.63	3.52	3.42
ENSMUSG00000041375	Ccdc9	-0.903482	3.9086e-16	19.09	18.52	10.2	10.27
ENSMUSG00000024299	Adamts10	-0.902163	0.000106985	3.59	3.35	2.44	1.67
ENSMUSG00000025016	Tm9sf3	-0.901934	4.07871e-41	31.57	31.59	17.57	17.35
ENSMUSG00000118125	Gm50387	-0.900189	0.0224219	2.17	2.17	0.97	1.39
ENSMUSG00000055305	Zfp93	-0.897126	0.00485889	3.1	2.48	1.49	1.46
ENSMUSG00000067365	Tmem128	-0.895997	0.00342506	7.37	7.95	4.67	4.2
ENSMUSG00000037816	Fbxw17	-0.893011	0.00171814	4.72	6.32	3.14	2.93
ENSMUSG00000020474	Polm	-0.890818	7.49308e-09	7.75	8.45	4.54	4.23
ENSMUSG00000047989	Ino80c	-0.884068	2.36271e-09	10.1	10.43	5.37	6.03
ENSMUSG00000056820	Tsnax	-0.882137	2.92254e-16	19.01	19.16	10.89	10.26
ENSMUSG00000046675	Tmem251	-0.87814	0.00569344	2.15	1.93	1.07	1.19
ENSMUSG00000040351	Ankib1	-0.873445	1.1104e-09	3.87	3.73	2.17	2.06
ENSMUSG00000039929	Urb1	-0.868759	3.28881e-46	18.3	18.62	10.44	10.17
ENSMUSG00000047557	Lxn	-0.867206	0.0945172	3.8	3.55	2.22	1.89
ENSMUSG00000026773	Pfkfb3	-0.865988	4.03161e-06	3.47	3.67	2.05	1.84
ENSMUSG00000073775	Kti12	-0.865112	1.59893e-09	17.16	18.12	10.18	9.56
ENSMUSG00000033712	Ccar2	-0.862971	1.31884e-25	19.29	19.7	10.9	10.94
ENSMUSG00000022973	Synj1	-0.849189	6.87282e-11	4.18	4.01	2.34	2.28
ENSMUSG00000031105	Slc25a14	-0.844775	0.0693453	2.83	2.94	1.72	1.55
ENSMUSG00000049124	Gm8186	-0.83993	0.157477	233.4	235.18	184	150.35
ENSMUSG00000001518	Itfg2	-0.838641	4.77809e-10	14.14	12.81	8.16	7.2
ENSMUSG00000039814	Xkr5	-0.835761	3.03151e-05	4.95	5.41	3.02	2.88
ENSMUSG00000022559	Fbxl6	-0.834664	1.27832e-12	23.34	24.31	13.9	13.32
ENSMUSG00000041079	Rwdd2b	-0.834181	0.000586073	5.37	6.48	3.41	3.36
ENSMUSG00000031916	Cog8	-0.830634	1.89369e-18	18.81	18.08	9.94	10.46
ENSMUSG00000027408	Cpxm1	-0.829748	6.54328e-05	6.05	7.55	3.77	4.03
ENSMUSG00000074797	Itpa	-0.82747	1.69416e-16	58.46	64.48	32.3	38.2
ENSMUSG00000020978	Klhdc2	-0.824087	6.96374e-08	12.92	12.72	7.2	7.54
ENSMUSG00000042472	Zfp410	-0.817807	4.41022e-08	10.14	11.72	6.08	6.41
ENSMUSG00000035293	G2e3	-0.816158	1.06187e-16	7.51	7.85	4.55	4.38
ENSMUSG00000000486	Septin1	-0.816118	1.36487e-62	224.04	213.48	124.48	128.64
ENSMUSG00000078903	Gm14391	-0.814476	0.0236418	4.05	5.01	2.91	2.7
ENSMUSG00000021597	Slf1	-0.803789	2.86569e-06	4.89	4.93	2.97	2.77
ENSMUSG00000057649	Brd9	-0.797247	2.46309e-09	13.31	12.96	8.15	7.23
ENSMUSG00000047084	Ngrn	-0.794073	8.69863e-09	23.97	24.24	13.98	14.32
ENSMUSG00000079179	Rab10os	-0.792694	5.43703e-06	5.73	5.51	3.07	3.16
ENSMUSG00000031156	Slc35a2	-0.792434	2.06399e-05	7.58	7.38	4.27	4.76
ENSMUSG00000019917	Septin10	-0.790645	0.000345182	4.9	5.69	3.55	3.18
ENSMUSG00000042854	Trp53rkb	-0.789492	0.00606534	1.91	2.31	1.3	1.4
ENSMUSG00000081476	Itpa-ps1	-0.77981	0.0212659	18.13	19.45	11.55	10.75
ENSMUSG00000027406	Idh3b	-0.777422	1.51488e-30	77.79	79.46	47.82	45.52
ENSMUSG00000030768	Disp1	-0.776864	0.000427636	2.58	2.51	1.65	1.38
ENSMUSG00000078566	Bnip3	-0.776278	2.42322e-10	24.37	25.21	15.78	15.46
ENSMUSG00000038022	Mindy4	-0.776208	0.0333393	1.57	1.72	0.91	0.99
ENSMUSG00000026499	Acbd3	-0.774423	5.50272e-13	12.86	12.29	7.49	7.48
ENSMUSG00000071252	2210408I21Rik	-0.772323	0.136214	1.62	1.42	0.85	0.68
ENSMUSG00000079224	Gm6565	-0.77105	0.930019	27.01	8.99	0	20.95
ENSMUSG00000030615	Tmem126a	-0.76718	0.000545811	21.47	22.81	13.81	12.69
ENSMUSG00000002617	Zfp40	-0.766694	0.0386683	1.26	1.48	0.86	0.83
ENSMUSG00000017747	Ghdc	-0.761253	5.02505e-07	10.35	9.88	6.41	5.76
ENSMUSG00000116715	Gm40881	-0.760469	0.161027	5.32	4.7	2.9	3.09
ENSMUSG00000033852	Gm28042	-0.759731	7.85062e-08	5.69	5.64	3.47	3.36
ENSMUSG00000026211	Obsl1	-0.755176	4.95786e-07	6.31	6.53	3.98	3.51
ENSMUSG00000032519	Slc25a38	-0.754281	4.82329e-09	18.83	20.78	12.03	11.9
ENSMUSG00000027985	Lef1	-0.752163	0.00159808	3.62	3.61	2.51	2.03
ENSMUSG00000002319	Ipo4	-0.748726	1.51249e-40	44.73	44.48	27.71	26.41
ENSMUSG00000037262	Kin	-0.741487	0.000327369	11.39	10.4	6.54	6.72
ENSMUSG00000035683	Melk	-0.74074	8.52069e-20	26.21	26.25	16.43	15.56
ENSMUSG00000038880	Mrps34	-0.737394	2.74689e-12	65.74	70.94	41.6	41.84
ENSMUSG00000079737	Bfar	-0.737223	0.0401364	3.87	4.32	2.31	2.82
ENSMUSG00000031803	B3gnt3	-0.733759	0.0142365	2.59	2.56	1.49	1.67
ENSMUSG00000046761	Fam83h	-0.732814	7.49789e-06	4.35	4.64	2.86	2.66
ENSMUSG00000028293	Slc35a1	-0.732748	1.53551e-05	10.77	13	6.95	7.62
ENSMUSG00000000600	Krit1	-0.73199	2.07709e-10	13.65	13.31	7.83	8.5
ENSMUSG00000027953	Slc50a1	-0.731769	0.00728734	10.95	12.2	6.81	7.24
ENSMUSG00000031513	Leprotl1	-0.728569	3.98409e-05	6.29	6.34	3.76	4
ENSMUSG00000045455	Gm9797	-0.726483	0.0837192	55.01	41.07	28.19	26.64
ENSMUSG00000000317	Bcl6b	-0.724451	0.000254465	5.04	4.35	2.84	2.94
ENSMUSG00000044991	Shld1	-0.724444	0.0727944	6.12	5.53	3.56	3.63
ENSMUSG00000087207	Gm13147	-0.723791	0.0291282	7.38	6.74	4.67	4.05
ENSMUSG00000038520	Tbc1d17	-0.721882	2.03113e-10	14.02	15.27	7.82	7.44
ENSMUSG00000025733	Rhot2	-0.72119	1.33132e-20	31.3	30.9	20.33	18.15
ENSMUSG00000008763	Man1a2	-0.721107	2.72521e-11	5.4	5.53	3.21	3.54
ENSMUSG00000026377	Nifk	-0.720977	2.37326e-18	42.84	45.72	27.39	27.29
ENSMUSG00000117748	Derpc	-0.718199	0.693843	1.33	2.45	1.76	0.6
ENSMUSG00000005505	Kbtbd4	-0.717101	5.55711e-08	12.6	13.54	8.17	8.03
ENSMUSG00000048528	Nkx1-2	-0.716923	0.0351768	1.89	2.11	1.21	1.27
ENSMUSG00000036639	Nudt1	-0.716671	7.68155e-07	40.67	40.51	24.04	26.13
ENSMUSG00000032769	Trpa1	-0.714748	0.0280886	2.04	1.76	1.38	1
ENSMUSG00000018733	Pex12	-0.714008	7.19445e-05	7.81	7.57	5.05	4.46
ENSMUSG00000008601	Rab25	-0.712422	0.11886	5.76	4.57	3.52	2.9
ENSMUSG00000024423	Impact	-0.71198	1.34581e-34	41.83	42.7	26.87	25.73
ENSMUSG00000018661	Cog1	-0.708578	6.83224e-17	17.41	18.18	11.32	11.17
ENSMUSG00000038500	Prr3	-0.703404	2.86203e-06	15.72	14.65	9.84	9.2
ENSMUSG00000004500	Zfp324	-0.703254	0.0433702	1.48	1.42	0.98	0.84
ENSMUSG00000030103	Bhlhe40	-0.702319	7.75681e-07	9.36	10.16	5.88	6.29
ENSMUSG00000027935	Rab13	-0.70077	0.114638	4.6	5.04	3.23	2.84
ENSMUSG00000091931	Gon7	-0.699573	0.0025906	11.98	13.38	7.66	8.22
ENSMUSG00000035105	Egln3	-0.698859	6.03253e-06	9.64	11.9	6.78	6.75
ENSMUSG00000030055	Rab43	-0.69883	0.152859	1.25	1.42	0.6	1.1
ENSMUSG00000097042	Gm17491	-0.696817	0.0808985	2.45	2.27	1.39	1.57
ENSMUSG00000004266	Ptpn6	-0.695774	1.05697e-10	20.39	21.42	12.88	13.39
ENSMUSG00000022971	Ifnar2	-0.692782	0.0737048	4.22	4.1	2.97	3.07
ENSMUSG00000091811	Inafm1	-0.688787	0.187822	2.72	3.23	1.38	2.36
ENSMUSG00000020491	2810021J22Rik	-0.688413	0.0013843	3.28	3.52	2.1	2.2
ENSMUSG00000079144	A130010J15Rik	-0.688345	0.02285	3.21	2.74	1.85	1.97
ENSMUSG00000026767	Mindy3	-0.684192	1.07332e-05	10.74	9.85	6.41	6.63
ENSMUSG00000118668	Rps6ka4	-0.68351	0.0195047	2.59	2.71	1.59	1.78
ENSMUSG00000059878	Zfp422	-0.682777	0.0117094	3.09	4.08	2.56	2.24
ENSMUSG00000022560	Slc52a2	-0.681916	5.19998e-05	3.52	3.59	2.28	2.24
ENSMUSG00000030111	A2m	-0.681037	0.0632916	1.34	1.85	0.85	1.18
ENSMUSG00000021932	Rnaseh2b	-0.678683	4.30774e-13	43.89	42.27	27.55	27.26
ENSMUSG00000021576	Pdcd6	-0.675477	1.87352e-12	56.18	59.17	37.17	36.07
ENSMUSG00000031074	Fgf3	-0.675048	0.101206	2.18	2.38	1.54	1.38
ENSMUSG00000079478	Znrd2	-0.669676	2.56671e-07	79.75	78.74	46.86	54.29
ENSMUSG00000032041	Tirap	-0.668894	0.0204774	2.54	2.63	1.66	1.73
ENSMUSG00000014859	E2f4	-0.66838	1.08755e-35	98.16	99.37	62.98	63.63
ENSMUSG00000058126	Tpm3-rs7	-0.668178	0.134249	2.41	2.13	1.34	1.56
ENSMUSG00000106918	Mrpl33	-0.66795	0.000108673	94.4	90.58	58.95	59.12
ENSMUSG00000043467	Zbtb37	-0.667185	9.98151e-11	3.47	3.35	2.24	2.33
ENSMUSG00000047909	Ankrd16	-0.666076	0.00782151	7.24	8.06	4.52	5.29
ENSMUSG00000026480	Ncf2	-0.664726	0.0725479	2.49	2.09	1.53	1.41
ENSMUSG00000019039	Dalrd3	-0.664235	5.65783e-11	30.14	30.43	19.31	19.64
ENSMUSG00000093908	Gm5784	-0.664065	0.192841	1.87	1.66	1.15	1.14
ENSMUSG00000030034	Ino80b	-0.662811	7.89648e-06	25.07	23.81	15.23	14.87
ENSMUSG00000028187	Rpf1	-0.66211	1.56965e-09	30.83	30.28	18.44	20.82
ENSMUSG00000051235	Gen1	-0.661554	9.02042e-07	5.43	5.19	3.47	3.37
ENSMUSG00000024424	Ttc39c	-0.661361	0.04282	3.18	4.37	2.18	2.74
ENSMUSG00000043155	Hpdl	-0.660246	0.0133135	6.07	7.01	3.72	4.7
ENSMUSG00000052921	Arhgef15	-0.659926	3.30667e-05	4.88	4.84	3.16	3.08
ENSMUSG00000034152	Exoc3	-0.653864	1.29906e-10	9.73	9.61	6.1	6.43
ENSMUSG00000000355	Mcts1	-0.653827	0.00922451	20.39	18.66	12.51	12.72
ENSMUSG00000061186	Sfmbt2	-0.647032	2.32929e-10	6.67	6.4	4.29	4.28
ENSMUSG00000113346	Eprn	-0.647013	7.49789e-06	20.07	20	13.14	12.48
ENSMUSG00000017288	Vps53	-0.643949	1.19199e-09	20.07	19.93	13.15	12.04
ENSMUSG00000022422	Dscc1	-0.639494	0.0278359	7.08	7.42	4.6	4.87
ENSMUSG00000097414	B130046B21Rik	-0.639413	0.301374	1.27	1.55	1.08	0.77
ENSMUSG00000102275	Gm37144	-0.637949	0.298567	3.1	2.87	1.96	1.95
ENSMUSG00000031631	Cfap97	-0.637752	0.00249801	2.98	3.11	1.99	1.95
ENSMUSG00000038510	Rpf2	-0.635334	5.74398e-09	43.07	41.54	26.09	29
ENSMUSG00000051550	Zfp579	-0.633003	0.102957	2.3	2.78	1.78	1.59
ENSMUSG00000086147	Zfp989	-0.632931	1.7038e-06	14.03	15.61	10.03	9.44
ENSMUSG00000039068	Zzz3	-0.629603	9.22932e-15	20.85	21.75	15.67	14.1
ENSMUSG00000054226	Tprkb	-0.629573	0.000734975	10.78	9.71	6.31	7.55
ENSMUSG00000027963	Extl2	-0.628959	0.0680095	2.43	2.17	1.48	1.55
ENSMUSG00000030037	Mrpl53	-0.627981	0.000131231	45.88	48.85	31.92	30.5
ENSMUSG00000030041	M1ap	-0.627276	0.0201314	5.25	5.24	3.61	3.32
ENSMUSG00000034290	Nek9	-0.624284	7.4806e-12	11.18	11.44	7.21	7.74
ENSMUSG00000042042	Csgalnact2	-0.624026	0.0309544	2.52	2.22	1.54	1.6
ENSMUSG00000037570	Mcrs1	-0.622217	3.25166e-17	58.6	55.14	37.73	37.17
ENSMUSG00000065999	Zfp985	-0.622178	9.68804e-05	7.93	8.09	5.32	5.29
ENSMUSG00000022175	Lrp10	-0.622125	1.87716e-07	9.18	8.92	6.35	5.64
ENSMUSG00000048865	Arhgap30	-0.621472	0.00161766	3.34	3.71	2.44	2.24
ENSMUSG00000027447	Cst3	-0.618523	4.49495e-12	104.87	111.17	74.61	68.7
ENSMUSG00000020788	Atp2a3	-0.617633	0.000578	4.08	3.81	2.73	2.51
ENSMUSG00000020311	Erlec1	-0.617319	0.00155156	6.62	6.47	4.15	4.54
ENSMUSG00000109005	Gm45221	-0.61688	0.252396	1.52	1.68	1.11	1.02
ENSMUSG00000078875	Gm14419	-0.616736	0.536229	6.79	11.64	7.53	7.17
ENSMUSG00000027331	Knstrn	-0.612421	1.58092e-07	19.98	17.41	11.53	12.71
ENSMUSG00000003541	Ier3	-0.611648	0.0649926	8.84	7.35	5.31	5.46
ENSMUSG00000031304	Il2rg	-0.610118	0.328871	1.75	1.93	1.22	1.24
ENSMUSG00000041187	Prkd2	-0.609181	0.014518	3.2	3.49	2.25	2.16
ENSMUSG00000022313	Utp23	-0.609019	0.00159702	10.34	10.86	7.57	7.48
ENSMUSG00000027804	Ppid	-0.608775	3.76621e-29	109.12	108.73	72.95	72.56
ENSMUSG00000116815	Gm49760	-0.608524	0.0879326	3.87	3.98	2.79	2.47
ENSMUSG00000030413	Pglyrp1	-0.608242	0.227585	8.67	8.72	5.64	5.95
ENSMUSG00000000731	Aire	-0.599146	0.04282	5.54	4.89	3.48	3.6
ENSMUSG00000023191	P3h3	-0.595034	0.152082	1.78	1.92	1.21	1.29
ENSMUSG00000033900	Map9	-0.59496	7.46955e-05	3.92	3.9	2.78	2.5
ENSMUSG00000048537	Phldb1	-0.594529	2.88846e-06	8.07	7.47	5.56	5.09
ENSMUSG00000060601	Nr1h2	-0.594503	1.55305e-15	54.31	52.27	34.64	36.99
ENSMUSG00000058388	Phtf1	-0.594089	0.00128857	6.57	7.21	5	4.17
ENSMUSG00000118664	Tusc3	-0.593823	0.000230424	8.22	8.21	5.33	5.77
ENSMUSG00000034274	Thoc5	-0.592863	2.25421e-18	57.22	57.51	37.38	40.09
ENSMUSG00000029649	Pomp	-0.592127	2.5662e-12	94.56	93.56	63.69	77.36
ENSMUSG00000020303	Stc2	-0.592073	0.00247461	3.91	4.51	2.87	2.82
ENSMUSG00000042694	Stn1	-0.591809	0.00319685	8.5	8.12	5.62	5.91
ENSMUSG00000057572	Zbtb8os	-0.590979	5.14046e-05	23.2	24.78	13.23	14.38
ENSMUSG00000003309	Ap1m2	-0.589363	8.53755e-06	17.93	17.35	11.69	12.25
ENSMUSG00000021819	Zswim8	-0.588068	2.05579e-06	6.36	5.62	3.97	4.08
ENSMUSG00000022346	Myc	-0.587742	0.00246798	8.09	8.59	6.47	5.53
ENSMUSG00000011114	Tbrg1	-0.587674	9.28323e-13	50	49.9	31.77	35.89
ENSMUSG00000079469	Pigb	-0.587008	3.1987e-06	14.42	13.57	9.2	9.65
ENSMUSG00000033285	Wdr3	-0.58692	1.96728e-19	35.37	35.49	24.6	23.48
ENSMUSG00000038712	Mindy1	-0.586067	4.00146e-09	25.11	26.85	16.69	18.04
ENSMUSG00000031562	Dctd	-0.586066	1.22646e-05	14.92	14.97	10.92	9.93
ENSMUSG00000058586	Serhl	-0.583674	0.0252072	8.08	8.08	5.54	5.46
ENSMUSG00000027010	Slc25a12	-0.583405	2.20089e-11	11.14	12.29	7.77	8.17
ENSMUSG00000029403	Cdkl2	-0.582163	0.0280739	2.61	2.72	1.92	1.83
ENSMUSG00000027865	Gdap2	-0.581468	0.0205907	4.27	4.09	2.38	2.9
ENSMUSG00000048007	Timm8a1	-0.580838	2.42072e-05	24.56	28.28	18.71	17.3
ENSMUSG00000027366	Sppl2a	-0.580408	0.00635731	2.48	2.99	1.97	1.77
ENSMUSG00000028825	Rhd	-0.578564	0.312321	2.32	2.85	1.52	2
ENSMUSG00000021550	2210016F16Rik	-0.576023	0.0108701	4.12	4.59	3.08	2.87
ENSMUSG00000029003	Mad2l2	-0.575924	0.00119341	18.71	21.27	13.28	12.55
ENSMUSG00000004359	Spic	-0.574782	0.214431	2.67	2.92	1.82	2
ENSMUSG00000024937	Ehbp1l1	-0.574631	0.102275	1.8	1.87	1.28	1.2
ENSMUSG00000035382	Pcsk7	-0.574524	0.000491836	6.41	5.53	4.08	4.06
ENSMUSG00000072772	Grcc10	-0.57401	4.45318e-09	83.17	82.08	56.97	56.02
ENSMUSG00000036948	Trappc14	-0.57398	3.26189e-05	13.01	13.12	8.67	8.72
ENSMUSG00000028331	Trmo	-0.57348	0.0108908	9.3	9.68	6.36	6.62
ENSMUSG00000022221	Ripk3	-0.572973	1.55151e-05	17.15	17.1	11.88	11.6
ENSMUSG00000003228	Grk5	-0.572098	0.0266766	1.54	1.51	1	1.09
ENSMUSG00000066438	Plekhd1	-0.571798	0.091118	2.03	1.98	1.3	1.45
ENSMUSG00000059772	Slx1b	-0.570612	0.000314528	7.71	8.56	5.23	5.94
ENSMUSG00000059149	Mfsd4a	-0.568577	0.157836	1.82	1.94	1.5	1.14
ENSMUSG00000023104	Rfc2	-0.568023	1.98596e-16	22.94	23.31	15.29	16.49
ENSMUSG00000002846	Timmdc1	-0.567898	0.00581276	10.66	10.91	7.04	7.77
ENSMUSG00000028468	Rgp1	-0.567847	6.42559e-09	9.8	9.25	6.16	6.49
ENSMUSG00000040356	Skiv2l	-0.566874	2.97076e-12	19.82	20.43	13.39	14.28
ENSMUSG00000015468	Notch4	-0.56622	3.2792e-09	8.42	9.07	6.22	5.83
ENSMUSG00000031987	Egln1	-0.566003	0.000175011	6.69	6.99	4.83	4.6
ENSMUSG00000046719	Nxph3	-0.564127	0.144966	3.28	3.13	1.9	2.51
ENSMUSG00000037049	Smpd1	-0.56324	0.14217	2.41	3.01	1.79	1.95
ENSMUSG00000087193	Gm14820	-0.561831	0.0098553	15.05	15	9.85	10.37
ENSMUSG00000020427	Igfbp3	-0.561776	0.0378077	4.58	4.13	3.12	2.92
ENSMUSG00000028729	Ebna1bp2	-0.560643	2.878e-17	41.57	42.62	28.34	29.81
ENSMUSG00000025747	Tyms	-0.560272	7.48857e-10	19.95	21.02	13.75	14.56
ENSMUSG00000030693	Klk10	-0.560056	0.170463	4.47	5.09	3.01	3.58
ENSMUSG00000121096	ENSMUSG00000121096	-0.55926	0.325542	3.33	2.78	1.74	2.46
ENSMUSG00000024442	Dele1	-0.556749	5.87693e-08	20.9	21.05	14.68	14.63
ENSMUSG00000032109	Nlrx1	-0.554487	0.0522504	2.46	2.56	1.74	1.77
ENSMUSG00000042988	Notum	-0.553839	3.35421e-16	56.21	56.29	38.35	39.21
ENSMUSG00000004789	Dlst	-0.552839	2.25421e-18	47.06	48.13	33.58	32.55
ENSMUSG00000020910	Adprm	-0.552161	0.00163721	19.49	17.58	12.6	13.12
ENSMUSG00000020736	Nt5c	-0.551314	0.00180181	40.44	38.23	24.02	30.46
ENSMUSG00000039128	Cdc123	-0.550585	2.22422e-10	40.89	39.99	27.47	28.76
ENSMUSG00000096740	Lbhd1	-0.550476	0.000901534	6.94	6.55	4.72	4.68
ENSMUSG00000019792	Trmt11	-0.549355	0.00342506	8.22	7.89	5.24	5.97
ENSMUSG00000048330	Ric3	-0.54854	0.0158582	2.74	2.76	1.81	2.03
ENSMUSG00000075227	Znhit2	-0.547252	0.0101508	13.48	12.98	8.93	9.49
ENSMUSG00000067713	Prkag1	-0.54712	9.42753e-08	32.18	33.55	23.37	22.44
ENSMUSG00000029557	Mrm2	-0.546835	0.00188769	15.42	15	10.4	10.8
ENSMUSG00000056300	Zfp981	-0.54648	2.87346e-12	28.87	29.4	21.1	19.68
ENSMUSG00000030929	Eri2	-0.545631	0.00661613	4.8	5.07	2.94	3.72
ENSMUSG00000026575	Nme7	-0.545051	2.0038e-07	30.23	31.16	20.8	21.59
ENSMUSG00000032078	Zpr1	-0.544029	2.67781e-13	30.94	31.09	22.19	21.17
ENSMUSG00000062906	Hdac10	-0.544006	0.240948	2.14	2.31	1.87	1.26
ENSMUSG00000014402	Tsg101	-0.543257	7.95374e-08	27.91	27.29	18.87	19.69
ENSMUSG00000028645	Slc2a1	-0.541601	1.375e-41	140.53	144.44	101.68	97.85
ENSMUSG00000030545	Pex11a	-0.540582	0.0721272	3.97	4.11	2.94	2.73
ENSMUSG00000037552	Plekhg2	-0.54058	4.2069e-05	7.28	6.58	4.7	4.94
ENSMUSG00000032606	Nicn1	-0.540338	0.000227791	12.79	13.11	9.31	8.84
ENSMUSG00000030881	Arfip2	-0.5395	6.32115e-07	16.23	16.71	11.73	11.73
ENSMUSG00000026035	Ppil3	-0.539399	0.0055166	20.57	24.18	15.34	15.33
ENSMUSG00000028999	Rint1	-0.539255	0.000400579	7.87	7.37	5.71	5.22
ENSMUSG00000030431	Tmem238	-0.538765	0.0793857	7.01	7.39	5.45	4.66
ENSMUSG00000028899	Taf12	-0.538549	0.000517349	6.84	6.89	4.44	5.18
ENSMUSG00000032328	Tmem30a	-0.537465	4.79378e-08	13.93	14.1	9.8	9.88
ENSMUSG00000056228	Cars2	-0.537287	0.00346994	10.47	11.39	7.22	8.12
ENSMUSG00000004561	Mettl17	-0.536381	0.000373541	18.8	18.53	12.33	13.94
ENSMUSG00000003421	Nosip	-0.536042	6.94334e-10	44.63	46.03	30.92	33.19
ENSMUSG00000025470	Zfp511	-0.535973	0.00720675	18.06	18.59	13.12	12.62
ENSMUSG00000030979	Uros	-0.535956	0.0271584	8.72	8.94	6.66	6.02
ENSMUSG00000025271	Pfkfb1	-0.535569	0.108226	4.45	5.05	3.27	3.41
ENSMUSG00000044337	Ackr3	-0.534439	0.0525534	4.15	3.38	2.92	2.38
ENSMUSG00000039096	Rsad1	-0.533745	0.0865019	2.03	1.87	1.41	1.34
ENSMUSG00000050592	Fam78a	-0.533735	0.104422	2	1.72	1.31	1.3
ENSMUSG00000045176	Borcs6	-0.533431	0.0374373	6.42	6.17	4.47	4.4
ENSMUSG00000007867	Ift43	-0.532767	0.180768	12.44	10.36	7.34	8.65
ENSMUSG00000091780	Sco2	-0.531993	0.384874	3.68	2.95	2.17	2.53
ENSMUSG00000022160	Mettl3	-0.531114	5.36987e-07	23.75	24.38	17.27	16.67
ENSMUSG00000024477	Pggt1b	-0.530542	7.49787e-05	5.87	6.01	2.76	4.1
ENSMUSG00000073436	Eme2	-0.530198	0.0959391	2.11	1.85	1.41	1.1
ENSMUSG00000049600	Zbtb45	-0.530081	1.60051e-07	20.69	21.14	15.09	14.99
ENSMUSG00000121438	ENSMUSG00000121438	-0.528465	0.0238391	37.58	41.8	29.07	26.89
ENSMUSG00000030630	Fah	-0.528462	0.0109996	10.32	10.61	7.34	7.44
ENSMUSG00000011958	Bnip2	-0.527462	7.55317e-05	17.38	14.93	11.99	11.28
ENSMUSG00000055128	Cgrrf1	-0.527053	0.394352	3.79	3.22	2.11	2.24
ENSMUSG00000021598	Med10	-0.526957	0.000164438	40.84	42.41	29.68	29.1
ENSMUSG00000026171	Rnf25	-0.526903	0.0010035	20.29	18.8	12.9	14.74
ENSMUSG00000037773	Pced1a	-0.526832	0.117251	3.1	2.87	2.06	1.89
ENSMUSG00000074217	Misp3	-0.526704	0.330673	3.24	3.13	2.04	2.46
ENSMUSG00000057409	Zfp53	-0.526032	0.098237	2.84	2.59	2.11	1.78
ENSMUSG00000037411	Serpine1	-0.525828	0.00143136	7.56	8.23	5.22	5.99
ENSMUSG00000021385	Ippk	-0.525016	0.00113145	5.54	5.88	3.88	3.63
ENSMUSG00000052593	Adam17	-0.524566	3.44783e-10	15.47	15.7	11	11.08
ENSMUSG00000027099	Mtx2	-0.524293	0.00170782	7.65	8.34	5.3	6.02
ENSMUSG00000039294	Cybc1	-0.523591	0.000708238	10.49	11.7	7.93	8.01
ENSMUSG00000072582	Ptrh2	-0.523037	2.38506e-06	13.83	14.1	9.85	9.95
ENSMUSG00000039233	Tbce	-0.52249	0.00411965	11.28	11.04	7.52	8.29
ENSMUSG00000070348	Ccnd1	-0.522403	9.44369e-19	38.41	38.44	27.24	27.28
ENSMUSG00000009090	Ap1b1	-0.522185	2.13011e-20	39.04	39.91	28.11	27.92
ENSMUSG00000064127	Med14	-0.522136	9.12513e-09	9.55	9.56	7	6.5
ENSMUSG00000038525	Armc10	-0.521697	1.86511e-11	38.75	39.61	28.27	27.3
ENSMUSG00000004948	Zp3	-0.52072	0.0349393	10.83	10.73	7.05	8.23
ENSMUSG00000031823	Zdhhc7	-0.519651	0.0134671	4.81	4.82	3.38	3.46
ENSMUSG00000032446	Eomes	-0.519546	0.0860722	2.43	2.57	1.66	1.85
ENSMUSG00000022833	Ccdc14	-0.519545	2.86203e-06	10.24	10.23	7.32	7.2
ENSMUSG00000038733	Wdr26	-0.51945	1.30919e-14	15.14	14.77	10.58	10.69
ENSMUSG00000053613	Notumos	-0.518316	0.0212078	5.35	6.39	4.49	3.9
ENSMUSG00000039617	Gm7488	-0.518195	0.199049	13.92	15.06	8.92	11.58
ENSMUSG00000015474	Ppt2	-0.516187	0.0026872	13.76	13.46	9.63	10.45
ENSMUSG00000075273	Ttc30b	-0.515264	0.367457	1.66	1.19	1.12	0.91
ENSMUSG00000001348	Acp5	-0.514676	0.0518146	9.19	8.99	6.95	6.08
ENSMUSG00000022091	Sorbs3	-0.512865	0.339555	1.31	1.31	0.85	1.03
ENSMUSG00000036743	Psma8	-0.512767	0.24778	3.29	3.59	2.7	2.15
ENSMUSG00000039725	Trp53rka	-0.512586	0.00705375	9.71	10.13	7.08	7.08
ENSMUSG00000033009	Ogfod1	-0.512052	5.39828e-09	12.15	11.79	8.43	8.67
ENSMUSG00000010406	Mrpl52	-0.512037	0.00266211	179.7	191.64	119.76	144.38
ENSMUSG00000049922	Slc35c1	-0.511944	0.0935359	2.95	2.97	1.88	2.33
ENSMUSG00000031557	Plekha2	-0.511048	1.24701e-06	11.93	12.71	8.89	8.78
ENSMUSG00000022711	Pmm2	-0.510716	0.00247461	12.37	13.51	9.64	8.88
ENSMUSG00000059555	Tor4a	-0.508847	0.0457314	3.41	3.98	2.52	2.77
ENSMUSG00000001082	Mfsd10	-0.508452	3.99601e-09	39.32	41.62	29.23	28.95
ENSMUSG00000038039	Gcc2	-0.508263	3.70281e-05	6.62	6.37	4.25	5.05
ENSMUSG00000102644	Thap6	-0.508194	0.0980317	3.71	2.85	2.41	2.77
ENSMUSG00000006941	Eif1b	-0.507931	0.0442777	13.85	14.72	9.69	10.74
ENSMUSG00000064356	mt-Atp8	-0.507189	0.000262397	4573.1	4399.03	4155.34	4274.28
ENSMUSG00000027531	Impa1	-0.506858	4.77809e-10	29.66	26.94	18.44	21.53
ENSMUSG00000022797	Tfrc	-0.506532	8.20517e-49	124.3	123.7	88.66	89.18
ENSMUSG00000025138	Sirt7	-0.505764	0.00134737	15.25	15.58	10.56	11.55
ENSMUSG00000001588	Acap1	-0.505714	0.0171358	6.26	6.3	4.77	4.24
ENSMUSG00000087179	5730471H19Rik	-0.505341	4.54254e-07	16.01	16.32	11.44	11.55
ENSMUSG00000089669	Tnfsf13	-0.504752	0.388251	3.94	2.41	2.06	2.47
ENSMUSG00000030309	Caprin2	-0.504453	0.000430104	8.17	8.37	5.58	6.16
ENSMUSG00000061126	Cyp4f39	-0.501377	0.353791	1.66	1.41	1.03	1.18
ENSMUSG00000032846	Zswim6	-0.500927	0.012105	3.22	2.95	2.12	2.31
ENSMUSG00000014856	Tmem208	-0.500888	0.0252072	24.64	25.13	17.73	17.8
ENSMUSG00000027613	Eif6	-0.499781	5.78507e-18	143.57	150.13	102.59	108.9
ENSMUSG00000049401	Ogfr	-0.499721	9.98155e-05	14.23	13.72	10.01	10.13
ENSMUSG00000042660	Wdr55	-0.499104	1.08678e-05	31.38	31.02	21.23	23.7
ENSMUSG00000029389	Ddx55	-0.498063	0.000846001	9.52	9.26	6.92	6.64
ENSMUSG00000028719	Cmpk1	-0.496639	1.13804e-05	12.97	13.02	9.56	9.22
ENSMUSG00000031256	Cstf2	-0.496631	1.52792e-12	26.96	25.22	19	19.08
ENSMUSG00000022814	Umps	-0.49654	2.40667e-17	47.45	46.14	33.05	34.53
ENSMUSG00000028223	Decr1	-0.496344	0.147671	2.97	2.69	1.76	2.32
ENSMUSG00000116673	A630089N07Rik	-0.496334	0.0575044	6.21	6.9	4.31	5.11
ENSMUSG00000047731	Wbp1l	-0.495276	1.10478e-09	18.87	19.18	13.87	13.66
ENSMUSG00000002064	Sdf2	-0.49496	1.80102e-05	36.82	36.7	26.71	26.42
ENSMUSG00000043110	Lrrn4	-0.494454	0.0677557	3.33	3.13	2.66	2.02
ENSMUSG00000078503	Zfp990	-0.493021	6.1863e-08	23.31	21.39	16.13	16.24
ENSMUSG00000020476	Dbnl	-0.49301	3.65349e-14	60.83	62.86	45.2	44.54
ENSMUSG00000026333	Gin1	-0.492807	0.139007	5.18	4.93	3.73	3.8
ENSMUSG00000034255	Arhgap27	-0.491708	0.0204774	4.34	4.45	2.88	3.2
ENSMUSG00000032215	Rsl24d1	-0.490451	8.16439e-14	84.53	85.73	66.72	62.96
ENSMUSG00000074527	Gm14296	-0.490403	0.637514	8.94	8.97	4.28	8.71
ENSMUSG00000067919	Rex2	-0.490297	8.65635e-07	12.99	12.63	9.17	9.41
ENSMUSG00000020522	Mfap3	-0.488448	2.4078e-08	13.4	13.78	10.12	9.63
ENSMUSG00000034789	Rab24	-0.488346	0.00411965	21.57	22.63	16.63	15.48
ENSMUSG00000096847	Tmem151b	-0.48831	0.0727944	2.25	2.01	1.54	1.56
ENSMUSG00000026848	Tor1b	-0.487452	0.000498076	10.66	12.51	8.73	8.13
ENSMUSG00000095661	Gm8935	-0.487415	0.0723886	3.8	3.95	2.97	2.66
ENSMUSG00000032615	Nt5m	-0.486887	0.510372	2.66	1.96	1.89	1.47
ENSMUSG00000020948	Klhl28	-0.486566	0.00824589	4.24	3.82	3.34	2.42
ENSMUSG00000001844	Zdhhc4	-0.486024	0.0149695	14.68	16.07	11.99	10.39
ENSMUSG00000037221	Mospd3	-0.485853	0.00114022	24.27	22.68	17.69	16.53
ENSMUSG00000027890	Gstm4	-0.48512	0.211944	5.28	4.68	3.24	3.91
ENSMUSG00000033430	Terf2ip	-0.484637	0.00348369	5.99	6.49	4.58	4.51
ENSMUSG00000030798	Cd37	-0.484374	0.299809	3.59	3.05	3.14	2.15
ENSMUSG00000074513	Arfip1	-0.484031	0.000644222	12.42	12.04	8.84	9.09
ENSMUSG00000030284	Creld1	-0.482969	4.93034e-05	17.24	17.71	12.44	13.02
ENSMUSG00000059142	Zfp945	-0.481901	0.0252083	2.68	2.31	1.81	1.79
ENSMUSG00000032517	Mobp	-0.480862	0.278688	5.92	4.69	4.45	3.83
ENSMUSG00000013701	Timm23	-0.48069	4.53087e-18	177.7	178.55	128.66	131.03
ENSMUSG00000062518	Zfp534	-0.480651	1.7004e-08	24.35	24.66	17.65	18.14
ENSMUSG00000035759	Bbs10	-0.480378	0.357971	1.5	1.5	1.02	1.17
ENSMUSG00000019578	Ubxn6	-0.479432	1.57464e-05	14.79	15.33	10.75	11.27
ENSMUSG00000067928	Zfp760	-0.47889	0.0988728	2.27	2.36	1.55	1.83
ENSMUSG00000036009	Mettl25	-0.478704	0.0902584	5.22	6.08	3.83	4.44
ENSMUSG00000041112	Elmo1	-0.478528	0.00715298	3.43	3.82	2.62	2.68
ENSMUSG00000032567	Aste1	-0.477523	0.0543858	5.3	5.64	4.05	3.85
ENSMUSG00000034659	Tmem109	-0.476023	0.00354755	11.09	12.57	8.57	8.63
ENSMUSG00000039810	Zc3h10	-0.475631	3.93788e-06	12.85	13.21	9.54	9.56
ENSMUSG00000032870	Smap2	-0.475418	9.15354e-05	13.31	12.7	9.71	9.35
ENSMUSG00000025235	Bbs4	-0.474572	0.0443276	5.75	5.17	3.86	4.13
ENSMUSG00000038671	Arfrp1	-0.474093	0.00199202	15.81	14.3	11.33	9.92
ENSMUSG00000005609	Ctr9	-0.473694	1.86773e-10	23.12	21.69	16.27	16.6
ENSMUSG00000024911	Fibp	-0.473345	0.00491393	22.42	22.91	15.64	17.58
ENSMUSG00000032842	Abcc10	-0.473039	0.0595077	2.44	2.55	1.68	1.98
ENSMUSG00000018167	Stard3	-0.473009	0.000393542	20.3	18.48	15.29	13.19
ENSMUSG00000011254	Thg1l	-0.472964	0.00065066	13.8	14.13	9.96	10.54
ENSMUSG00000062376	Borcs7	-0.471887	0.458755	1.56	1.48	1.25	0.99
ENSMUSG00000004661	Arid3b	-0.471673	2.58181e-08	19.31	20.86	15.13	15.05
ENSMUSG00000073460	Pnldc1	-0.471299	0.0234917	8.25	7.96	5.66	6.25
ENSMUSG00000007817	Zmiz1	-0.470983	7.67652e-05	5.51	5.12	4.05	3.87
ENSMUSG00000114816	Gm10323	-0.470636	0.111986	2.64	2.92	1.96	2.14
ENSMUSG00000072704	Smim10l1	-0.47024	0.237306	3.06	2.08	2.02	2.37
ENSMUSG00000025269	Apex2	-0.470113	0.00749229	9.62	10.18	6.9	7.12
ENSMUSG00000006649	Nphs1	-0.470048	0.000478516	7.43	6.69	5.29	5.1
ENSMUSG00000022043	Trim35	-0.469034	1.58092e-07	17.09	17.22	12.86	12.4
ENSMUSG00000050357	Carmil2	-0.467287	0.0792954	2.46	2.69	1.86	1.94
ENSMUSG00000071369	Map3k5	-0.466961	0.0916209	1.8	2.01	1.32	1.48
ENSMUSG00000027466	Rbck1	-0.466797	5.07784e-08	31.63	31.34	22.86	24.06
ENSMUSG00000031099	Smarca1	-0.466422	0.221882	1.64	1.47	1.08	1.31
ENSMUSG00000023277	Twf2	-0.466354	2.55062e-06	38.74	41.39	28.71	30.32
ENSMUSG00000061524	Zic2	-0.465988	1.98512e-07	26.85	26.46	19.69	19.63
ENSMUSG00000078546	Zfp995	-0.46553	0.339555	2.28	2.5	1.72	1.75
ENSMUSG00000043681	Fam25c	-0.465299	0.30786	48.73	36.32	29.36	33.14
ENSMUSG00000024404	Riok3	-0.465124	5.15199e-09	20.47	20.83	15.17	15.32
ENSMUSG00000032024	Clmp	-0.463831	0.00979805	4.96	4.85	3.87	3.38
ENSMUSG00000030849	Fgfr2	-0.462809	0.138422	2.71	2.44	1.62	1.98
ENSMUSG00000026036	Nif3l1	-0.462167	4.75746e-08	31.18	31.73	23.2	22.73
ENSMUSG00000068923	Syt11	-0.460439	0.0208076	3.65	3.81	2.7	2.8
ENSMUSG00000015790	Surf1	-0.46038	0.042367	14.51	16.47	10.84	12.1
ENSMUSG00000084957	Bbip1	-0.46019	0.361936	11.15	7.08	5.38	7.45
ENSMUSG00000035578	Iqcg	-0.458991	0.00208149	4.61	4.57	3.29	3.51
ENSMUSG00000001128	Cfp	-0.45839	0.059646	9.15	8.23	6.56	6.32
ENSMUSG00000079108	Srp54c	-0.457911	0.000331296	18.76	22.65	15.7	15.05
ENSMUSG00000026204	Ptprn	-0.457217	0.252113	1.72	1.79	1.44	1.17
ENSMUSG00000045251	Zfp688	-0.45694	0.248675	8.46	7.52	5.5	6.32
ENSMUSG00000036916	Zfp280c	-0.456818	0.00391987	6.53	6.36	5.13	4.46
ENSMUSG00000037525	Bcdin3d	-0.456709	0.185654	6.93	7	5.02	5.32
ENSMUSG00000052133	Sema5b	-0.455801	0.0413951	3.08	3.49	2.51	2.39
ENSMUSG00000071180	Smim15	-0.455567	0.000618312	25.42	25.37	18.05	17.62
ENSMUSG00000028842	Ago3	-0.454312	0.000739869	2.3	2.13	1.77	1.53
ENSMUSG00000035078	Mtmr9	-0.453899	4.86426e-06	21.83	22.82	16.14	17.07
ENSMUSG00000033253	Szt2	-0.453585	8.1718e-13	10.97	10.73	8.08	8.07
ENSMUSG00000011658	Fuz	-0.452553	0.0665233	10.13	10.25	8.49	7.78
ENSMUSG00000028688	Toe1	-0.451602	0.000279727	18.31	19.9	14.33	14.15
ENSMUSG00000038545	Cul7	-0.450538	3.74082e-15	27.59	27.15	20.41	20.4
ENSMUSG00000003604	Aven	-0.450317	0.153591	16.36	18.87	11.76	14.43
ENSMUSG00000038023	Atp6v0a2	-0.449451	2.05853e-06	10.38	10.34	7.83	7.64
ENSMUSG00000038550	Ciart	-0.448972	0.317874	4.09	4.36	2.76	3.54
ENSMUSG00000067714	Lpar5	-0.44866	0.325577	3.94	4.37	2.99	3.21
ENSMUSG00000099474	1700097N02Rik	-0.448371	0.0140241	33.21	32.92	23.47	25.82
ENSMUSG00000020133	2310011J03Rik	-0.448228	0.0048404	19.46	16.71	13.49	13.49
ENSMUSG00000033735	Spr	-0.448195	4.69851e-07	70.34	68.8	50.05	53.45
ENSMUSG00000027698	Nceh1	-0.448073	0.0213351	3.89	3.9	3.05	2.77
ENSMUSG00000035378	Shq1	-0.446495	0.00100687	13.49	14.89	11.26	9.99
ENSMUSG00000019303	Psmc3ip	-0.446369	0.000559395	30.74	33.12	23.62	24.1
ENSMUSG00000041351	Rap1gap	-0.4455	0.0297558	5.61	5.01	3.93	3.99
ENSMUSG00000035139	Secisbp2	-0.445482	7.26902e-05	13.45	14.22	10.34	10.79
ENSMUSG00000006313	Upk1a	-0.444762	0.376136	3.53	3.72	2.46	2.96
ENSMUSG00000052155	Acvr2a	-0.444039	0.0507033	2.63	2.36	1.78	1.95
ENSMUSG00000043895	S1pr2	-0.443726	7.19445e-05	6.85	7.17	5.5	5.01
ENSMUSG00000043770	Gm12481	-0.443477	0.190057	253.21	227.19	180.22	212.16
ENSMUSG00000069755	Zfp125	-0.442542	0.35407	1.87	2.12	1.58	1.41
ENSMUSG00000040811	Eml2	-0.440836	6.68428e-06	25.05	24.75	18.92	18.41
ENSMUSG00000062822	4833420G17Rik	-0.4405	8.32984e-05	15.58	15.48	11.75	11.31
ENSMUSG00000037646	Vps13b	-0.440469	2.12464e-07	5.89	5.72	4.61	4.12
ENSMUSG00000031711	Zfp330	-0.439608	4.88762e-05	33.42	31.53	25.36	23.42
ENSMUSG00000087396	4933407K13Rik	-0.438358	0.214091	2.09	2.29	1.79	1.53
ENSMUSG00000023923	Tbc1d5	-0.438131	0.103597	1.9	2.1	1.53	1.48
ENSMUSG00000034111	Tmed8	-0.438105	7.68957e-05	5.84	5.83	4.55	4.23
ENSMUSG00000005950	P2rx5	-0.437957	0.511382	1.28	1.23	0.96	0.93
ENSMUSG00000074731	Zfp345	-0.43711	0.103197	4.47	4.22	3.02	3.51
ENSMUSG00000024565	Sall3	-0.437095	0.00575475	4.05	3.62	3.07	2.89
ENSMUSG00000022503	Nubp1	-0.437035	9.26516e-07	32.43	34.01	25.32	24.7
ENSMUSG00000075012	Fjx1	-0.436218	0.425768	1.68	1.24	0.92	1.27
ENSMUSG00000066007	Zfp600	-0.435452	4.12919e-05	11.32	11.87	9.02	8.39
ENSMUSG00000039115	Itga9	-0.435428	0.044221	2.44	2.24	1.74	1.81
ENSMUSG00000033972	Zfp944	-0.434654	0.0844176	4.35	4.93	3.6	3.39
ENSMUSG00000029480	Dhx37	-0.434614	6.04865e-10	22.66	22.14	17.39	16.39
ENSMUSG00000034450	Gulo	-0.434191	0.483353	1.58	1.48	1.25	1.06
ENSMUSG00000060803	Gstp1	-0.433232	1.69622e-09	187.53	197.03	141.25	148.37
ENSMUSG00000021891	Mettl6	-0.432485	0.00201903	9.33	8.77	7.09	7.51
ENSMUSG00000018774	Cd68	-0.432114	0.0733645	14.28	13.42	11.57	9.6
ENSMUSG00000062312	Erbb2	-0.431815	0.00215933	5.86	5.86	4.62	4.25
ENSMUSG00000030738	Eif3c	-0.430507	1.36073e-33	178.93	181.71	135.3	137.36
ENSMUSG00000027889	Ampd2	-0.430468	1.06774e-08	25.3	25.58	19.82	18.72
ENSMUSG00000015290	Ubl4a	-0.429674	0.00222129	15.49	18.2	12.24	13.33
ENSMUSG00000049502	Dtx3l	-0.429181	0.0391025	3.36	4.09	2.68	2.77
ENSMUSG00000024926	Kat5	-0.428785	0.000358989	21.4	20.98	16.18	15.81
ENSMUSG00000001281	Itgb7	-0.42792	0.00224601	11.83	11.57	9.23	8.5
ENSMUSG00000026577	Blzf1	-0.427295	0.00549435	13.47	11.95	9.53	9.99
ENSMUSG00000032705	Exd2	-0.426699	0.00221586	10.13	9.16	7.4	7.21
ENSMUSG00000060038	Dhps	-0.426323	0.00462839	25.16	23.2	18.1	18.53
ENSMUSG00000022386	Trmu	-0.426307	0.384364	3.43	3.38	2.47	2.69
ENSMUSG00000021621	Zcchc9	-0.426112	0.0528816	10.62	11.24	8.23	8.34
ENSMUSG00000056962	Jmjd6	-0.426059	2.34477e-08	57.64	59.32	44.12	44.52
ENSMUSG00000004096	Cwc15	-0.425991	1.07116e-05	75.4	71.19	56.14	55.09
ENSMUSG00000071719	Nalf2	-0.425623	0.270409	1.72	1.7	1.17	1.41
ENSMUSG00000034254	Agpat1	-0.424734	2.40518e-09	50.23	49.2	38.71	36.87
ENSMUSG00000000001	Gnai3	-0.424283	1.21845e-12	45.48	47.07	35	35.28
ENSMUSG00000079043	Fastkd5	-0.424152	0.0300377	5.99	6.91	5	4.81
ENSMUSG00000021556	Golm1	-0.423922	2.08563e-07	20.74	20.15	15.08	16.01
ENSMUSG00000024258	Polr2d	-0.423536	0.000387524	67.46	76.27	49.68	57.65
ENSMUSG00000039887	Alg14	-0.423239	0.344475	2.57	3.08	2.39	2.12
ENSMUSG00000022546	Gpt	-0.423235	0.389404	4.21	4.15	3.69	3.14
ENSMUSG00000000120	Ngfr	-0.422923	6.88666e-08	23.64	23.9	18.08	18.05
ENSMUSG00000039166	Akap7	-0.422638	0.319597	3.55	2.58	2.43	2.26
ENSMUSG00000043671	Dpy19l3	-0.422379	0.0449482	1.91	2.24	1.61	1.55
ENSMUSG00000039210	Gpatch2	-0.422349	0.00169606	8.1	8.51	5.93	6.01
ENSMUSG00000067942	Zfp160	-0.422103	0.0252511	7.04	8.33	5.51	6.76
ENSMUSG00000047098	Rnf31	-0.422097	5.49231e-07	21.38	22.06	17.01	16.03
ENSMUSG00000029701	Rbm28	-0.42188	1.9329e-11	30.53	29.15	22.69	22.7
ENSMUSG00000035845	Alg12	-0.421702	0.0721331	7.53	7.37	5.21	5.97
ENSMUSG00000032202	Rab27a	-0.421359	0.0466798	5.23	5.6	4.09	4.11
ENSMUSG00000026519	Tmem63a	-0.421063	0.0665233	4.35	4.79	3.28	3.68
ENSMUSG00000113047	Gm47469	-0.421035	0.00922677	7.78	7.71	6.16	6.01
ENSMUSG00000034931	Dhx8	-0.420932	9.74568e-16	44.33	43.54	33.5	33.37
ENSMUSG00000021097	Clmn	-0.420861	0.128099	2.13	1.78	1.57	1.55
ENSMUSG00000063801	Ap3s2	-0.420464	1.37319e-07	13.21	13.64	10.19	10.25
ENSMUSG00000056260	Lrif1	-0.42002	0.168637	3.96	4.41	3.36	3.27
ENSMUSG00000043346	Gm6741	-0.419753	0.388251	11.88	11.2	6.86	10.61
ENSMUSG00000039824	Myl6b	-0.419741	0.169873	11.67	11.41	9.07	8.5
ENSMUSG00000015189	Casd1	-0.419707	0.149095	2.48	2.91	2.19	1.92
ENSMUSG00000018322	Tomm34	-0.419535	1.87716e-07	44.38	46.79	34.13	34.9
ENSMUSG00000027194	Ttc17	-0.418907	0.00787799	7	7.14	5.52	5.13
ENSMUSG00000027272	Ubr1	-0.418304	4.03564e-06	7.87	7.74	6.07	5.83
ENSMUSG00000035557	Krt17	-0.417921	0.032253	13.24	12.73	9.99	9.8
ENSMUSG00000023572	Ccndbp1	-0.416903	0.00808106	17.57	18.61	13.88	13.94
ENSMUSG00000035049	Rrp12	-0.41664	1.46118e-12	37.35	35.82	28.43	27.44
ENSMUSG00000057411	Antkmt	-0.41559	0.20304	14.12	16.34	10.86	12.88
ENSMUSG00000020397	Med7	-0.415191	0.00808229	19.43	18.62	16.07	16.19
ENSMUSG00000055900	Tmem69	-0.414099	0.279266	8.41	6.03	5.33	5.05
ENSMUSG00000048410	Zfp407	-0.413658	0.00109939	4.22	4.4	3.29	3.31
ENSMUSG00000045009	Prrt3	-0.413646	0.177295	2.83	2.91	2.14	2.44
ENSMUSG00000028668	Eloa	-0.41339	0.000812051	8.38	7.82	6.38	6.01
ENSMUSG00000063556	Gm10132	-0.413228	0.25356	47.63	42.6	41.11	28.02
ENSMUSG00000019235	Rps6kl1	-0.413137	0.0128749	9.52	8.81	6.49	7.45
ENSMUSG00000040345	Arhgap9	-0.412785	0.0671061	8.81	9.21	6.53	7.11
ENSMUSG00000002963	Pnkp	-0.412131	0.000240885	23.73	23.07	18.9	17.31
ENSMUSG00000064264	Zfp428	-0.41159	1.18132e-05	63.13	64.62	47.8	49.95
ENSMUSG00000042622	Maff	-0.409872	0.473629	2.46	1.95	1.59	1.83
ENSMUSG00000045699	Gm21411	-0.408854	0.00275976	28.79	28.15	21.98	21.69
ENSMUSG00000069844	Sco1	-0.408832	0.000383081	19.11	18.04	14.11	14.38
ENSMUSG00000028821	Syf2	-0.408634	0.00166085	29.25	30.5	23.72	22.15
ENSMUSG00000025158	Rfng	-0.408496	0.00050954	26.58	26.48	22.23	18.54
ENSMUSG00000040703	Cyp2s1	-0.408312	0.105493	4.69	5.49	3.68	4.1
ENSMUSG00000038781	Stap2	-0.407755	0.568895	2.13	2.1	1.41	1.83
ENSMUSG00000020534	Shmt1	-0.407432	1.0479e-16	82.85	83.57	63.34	64.5
ENSMUSG00000034730	Adgrb1	-0.407298	0.0733645	3.25	3.25	2.63	2.61
ENSMUSG00000040957	Cables1	-0.407135	0.190947	2.65	3.32	2.31	2.27
ENSMUSG00000031537	Ikbkb	-0.406176	0.0018212	9.56	9.1	7.38	7.01
ENSMUSG00000030707	Coro1a	-0.406143	0.422009	3	3.24	2.13	2.65
ENSMUSG00000038894	Irs2	-0.406084	0.019622	4	4.08	3.45	2.77
ENSMUSG00000044881	Coa4	-0.405425	0.294248	8.26	9.31	7.58	7
ENSMUSG00000030447	Cyfip1	-0.40496	1.38417e-12	37.8	38.24	29.96	27.79
ENSMUSG00000033970	Rfc3	-0.404936	0.00203664	29.91	32.2	23.82	23.96
ENSMUSG00000023009	Nckap5l	-0.404824	0.0258644	4.03	4.26	3.1	3.27
ENSMUSG00000046798	Cldn12	-0.404645	0.00362551	8.93	8.88	7.2	6.49
ENSMUSG00000021557	Agtpbp1	-0.404616	0.0928644	3.31	3.79	3.26	2.68
ENSMUSG00000027166	Dnajc24	-0.403964	0.258919	7.27	8.45	6.44	5.68
ENSMUSG00000058186	Zfp980	-0.403651	1.63483e-11	35.22	35.31	27.37	26.97
ENSMUSG00000025494	Sigirr	-0.402885	0.0439219	11.96	10.92	9.23	8.32
ENSMUSG00000074863	Platr25	-0.40248	0.17605	4.12	4.31	3.27	3.35
ENSMUSG00000075590	Nrbp2	-0.402331	0.317874	2.42	2.27	1.59	2.11
ENSMUSG00000021018	Polr2h	-0.401861	0.000567345	61.87	68.43	49.99	48.98
ENSMUSG00000032513	Gorasp1	-0.401841	0.0115629	7.07	6.58	4.98	5.54
ENSMUSG00000040631	Dok4	-0.401029	0.492336	1.51	1.54	1.31	1.05
ENSMUSG00000034259	Exosc4	-0.400052	0.000929982	25.59	25.69	18.8	20.76
ENSMUSG00000038811	Gngt2	-0.399621	0.477643	10.01	10.02	8.07	7.51
ENSMUSG00000079104	Prps1l3	-0.399265	0.00024088	32.6	33.33	24.24	26.66
ENSMUSG00000071647	Eml3	-0.398918	0.000905903	12.87	13.88	10.39	10.31
ENSMUSG00000072761	Gm6712	-0.398659	0.238023	3.93	3.77	3.12	2.83
ENSMUSG00000031568	Rwdd4a	-0.398531	0.00354755	10.96	10.94	8.41	8.51
ENSMUSG00000030310	Slc6a1	-0.397821	0.360509	1.53	1.37	1.02	0.99
ENSMUSG00000022206	Npr3	-0.397746	0.319391	1.72	1.64	1.04	1.57
ENSMUSG00000066009	Zfp987	-0.397125	6.72614e-05	20.48	19.62	15.64	15.38
ENSMUSG00000043019	Edem3	-0.39705	5.14046e-05	9.36	8.72	7.19	6.93
ENSMUSG00000034765	Dusp5	-0.396942	0.1601	4.43	4.47	3.42	3.48
ENSMUSG00000001062	Vps9d1	-0.396905	0.16197	3.97	3.7	2.8	3.14
ENSMUSG00000021890	Eaf1	-0.396755	2.0713e-09	25.34	25.91	20.49	19.2
ENSMUSG00000046441	Cmtr2	-0.396472	0.319597	1.9	1.72	1.43	1.37
ENSMUSG00000075040	Zfp408	-0.396373	0.004684	8.89	9.24	6.72	7.29
ENSMUSG00000000148	Brat1	-0.395727	0.00683245	9.52	8.51	7.03	6.98
ENSMUSG00000067377	Tspan6	-0.395676	0.417997	2.85	3.01	2.33	2.21
ENSMUSG00000031198	Fundc2	-0.395604	0.0457314	7.29	7.11	5.6	5.54
ENSMUSG00000089847	Timm10b	-0.3956	0.0786	35.1	27.16	26.7	27.97
ENSMUSG00000001665	Gstt3	-0.394757	0.136258	8.33	7.33	5.5	6.92
ENSMUSG00000024300	Myo1f	-0.39474	0.103923	3.37	3.88	2.82	2.8
ENSMUSG00000004221	Ikbkg	-0.394664	0.0087353	5.92	5.86	4.78	4.47
ENSMUSG00000041360	Pum3	-0.394038	1.81062e-11	49.16	50.19	39.76	37.31
ENSMUSG00000020935	Dcakd	-0.39401	4.02116e-16	159.05	155.32	120.67	122.96
ENSMUSG00000031792	Usb1	-0.393804	0.00914921	18.28	17.36	14.5	13.14
ENSMUSG00000023800	Tiam2	-0.393433	0.160329	1.77	1.68	1.29	1.39
ENSMUSG00000022035	Ccdc25	-0.393144	0.000369593	24.77	24.05	20.09	17.81
ENSMUSG00000046229	Scand1	-0.392617	0.170616	20.08	18.8	14.3	15.9
ENSMUSG00000024668	Sdhaf2	-0.392546	0.0096653	12.44	13.29	9.52	10.49
ENSMUSG00000026927	Entr1	-0.392359	0.000149226	27.43	28.07	21	22.23
ENSMUSG00000014074	Rnf168	-0.392124	4.11188e-05	12.82	12.76	9.86	10.01
ENSMUSG00000078868	Gm14412	-0.391803	0.185897	8.26	6.95	5.75	6.04
ENSMUSG00000028898	Trnau1ap	-0.391678	0.0410957	22.1	24.19	19.36	16.54
ENSMUSG00000073988	Ttpa	-0.391638	0.25356	3.15	2.91	2.65	2.07
ENSMUSG00000036492	Rnf39	-0.39098	0.649224	2.18	1.3	1.17	1.52
ENSMUSG00000028848	Gpn2	-0.390868	0.00511833	38.36	31.74	27.17	26.85
ENSMUSG00000038059	Smim3	-0.390327	0.397054	2.89	3.04	2.58	2.03
ENSMUSG00000003581	Rnf215	-0.389604	0.229144	5.34	5.24	4.46	3.77
ENSMUSG00000031834	Pik3r2	-0.389421	4.80935e-06	24.98	23.47	18.94	18.73
ENSMUSG00000021703	Serinc5	-0.389271	0.0738876	2.94	2.97	2.44	2.16
ENSMUSG00000053347	Zfp943	-0.389037	0.500326	1.39	1.64	1.2	1.33
ENSMUSG00000057886	Cbx3-ps6	-0.388986	0.584256	10.28	11.67	6.84	10.2
ENSMUSG00000029918	Mrps33	-0.388926	0.0231103	35.02	35.8	24.69	30.16
ENSMUSG00000121192	ENSMUSG00000121192	-0.388811	0.517055	2.7	2.72	2.25	1.98
ENSMUSG00000059355	Wdr83os	-0.388521	0.00921622	40.18	42.5	32.4	32.34
ENSMUSG00000029642	Polr1d	-0.388483	2.70585e-06	91.14	87.96	67.28	71.89
ENSMUSG00000035325	Sec31a	-0.388242	2.30617e-16	60.91	60.7	48.16	46.58
ENSMUSG00000118653	Gm2296	-0.387722	0.255391	12.07	10.51	8.25	9.28
ENSMUSG00000027660	Skil	-0.387554	1.73449e-08	16.2	16.15	12.92	12.33
ENSMUSG00000022361	Zhx1	-0.387174	0.288116	1.43	1.53	1.14	1.15
ENSMUSG00000013698	Pea15a	-0.386884	0.205024	4.11	5.16	3.37	3.84
ENSMUSG00000117231	Gm41609	-0.386828	0.46561	1.95	1.88	1.52	1.47
ENSMUSG00000061028	Clasrp	-0.386697	0.000145417	25.95	25.74	19.72	20.55
ENSMUSG00000079605	Zbtb9	-0.386533	0.0228137	8.85	8.44	6.47	7
ENSMUSG00000048027	Rgmb	-0.386332	0.0950161	2.71	2.82	2.06	2.17
ENSMUSG00000019960	Dusp6	-0.386254	0.0277357	8.12	7.78	6.19	6.24
ENSMUSG00000052117	D630039A03Rik	-0.38606	0.192926	4.09	3.55	2.85	3.1
ENSMUSG00000045268	Zfp691	-0.385564	0.448365	3.28	3.02	2.55	2.33
ENSMUSG00000003271	Sult2b1	-0.385331	0.55873	3.18	2.99	2.35	2.4
ENSMUSG00000103273	Gm37913	-0.384961	0.645007	1.93	0.84	0.89	1.28
ENSMUSG00000027329	Spef1	-0.38496	0.574629	1.35	1.11	0.97	0.96
ENSMUSG00000024013	Fgd2	-0.383261	0.572957	1.52	1.2	1.04	1.22
ENSMUSG00000032011	Thy1	-0.382914	0.525263	2.39	2.48	2.03	2
ENSMUSG00000034032	Rpap1	-0.382761	2.92254e-16	55.95	55.19	44.05	42.67
ENSMUSG00000043424	Eif3j2	-0.382626	0.234651	3.81	4.67	3.3	3.34
ENSMUSG00000046733	Gprc5a	-0.382264	0.010365	14.18	15.34	11.52	11.56
ENSMUSG00000055041	Commd5	-0.381817	0.0721331	23.87	24.36	16.83	20.8
ENSMUSG00000041671	Pyroxd1	-0.381487	0.130498	4.84	4.49	3.7	3.6
ENSMUSG00000032571	Pik3r4	-0.381429	2.75774e-07	20.92	22.5	17.19	16.73
ENSMUSG00000078905	Gm14393	-0.381234	0.611908	7.25	7.71	5.88	6.31
ENSMUSG00000025723	Nmb	-0.381169	0.584766	6.55	6.41	4.8	5.32
ENSMUSG00000113450	Zfp935	-0.380623	0.228855	3.89	3.88	3.19	2.87
ENSMUSG00000022218	Tgm1	-0.380439	0.00131716	15.71	15.11	12.19	11.91
ENSMUSG00000047603	Zfp235	-0.379734	0.255238	2.56	2.44	1.98	1.94
ENSMUSG00000038291	Snx25	-0.379394	0.373394	1.92	1.76	1.41	1.5
ENSMUSG00000005779	Psmb4	-0.379143	1.80579e-14	256.52	261.47	199.26	206.16
ENSMUSG00000031948	Kars	-0.379122	1.55172e-20	195.88	194.57	153.16	152.37
ENSMUSG00000020541	Tom1l1	-0.379079	0.000226321	25.82	24.78	20.72	18.34
ENSMUSG00000039917	Rhbdd2	-0.378941	0.022135	5.81	5.49	4.48	4.37
ENSMUSG00000031482	Slc25a15	-0.378411	0.00148933	12.96	12.73	10.62	9.53
ENSMUSG00000014771	Pdcd2	-0.377959	0.010299	32.43	34.52	25.29	27.22
ENSMUSG00000002844	Adprh	-0.377919	6.69885e-08	41.96	41.17	31.39	33.76
ENSMUSG00000052253	Zfp622	-0.377687	9.27325e-07	31.73	32.38	24.99	25.29
ENSMUSG00000090077	Lime1	-0.376924	0.0674388	10.54	10.24	7.56	8.66
ENSMUSG00000027540	Ptpn1	-0.376876	0.000202736	12.99	14.05	10.82	10.42
ENSMUSG00000039195	Bbln	-0.375359	0.199102	23.31	24.82	18.8	17.71
ENSMUSG00000037239	Spred3	-0.375267	0.396176	1.41	1.55	1.02	1.3
ENSMUSG00000041625	Ggact	-0.374763	0.484402	5.62	4.81	3.98	4.36
ENSMUSG00000033624	Pdpr	-0.374522	0.0017344	8.13	8	6.51	6.17
ENSMUSG00000042195	Slc35f2	-0.373838	1.5948e-06	35.96	37.42	29.54	28.18
ENSMUSG00000047658	Gal3st3	-0.372475	0.267917	4.2	3.5	2.99	3.07
ENSMUSG00000026926	Pmpca	-0.372374	2.88982e-12	62.19	63.19	49.01	49.37
ENSMUSG00000026705	Klhl20	-0.371668	0.00357955	9.46	9.47	7.87	7.05
ENSMUSG00000001134	Uxt	-0.371651	0.146544	19.46	20.38	15.66	15.65
ENSMUSG00000038775	Vill	-0.371496	0.25356	4.93	5.76	4.18	3.25
ENSMUSG00000071649	B3gat3	-0.371398	0.0174709	18.38	18.79	14.28	14.97
ENSMUSG00000005892	Trh	-0.371083	9.74541e-09	142.53	146.59	108.55	119
ENSMUSG00000026436	Elk4	-0.370864	0.158875	3.66	2.8	2.54	2.31
ENSMUSG00000041354	Rgl2	-0.370514	1.08046e-05	22.82	22.93	17.97	18.09
ENSMUSG00000027694	Gm8325	-0.369846	0.248752	23.32	24.6	15.87	23.66
ENSMUSG00000078784	Rbis	-0.369186	0.0021959	218.9	232.67	181.58	169.94
ENSMUSG00000032232	Cgnl1	-0.369029	0.0724651	2.49	2.53	2.03	1.93
ENSMUSG00000002105	Slc39a13	-0.368624	0.350739	4	3.81	3.05	3.05
ENSMUSG00000035521	Gnptg	-0.368582	0.098237	15.83	14.8	10.93	12.23
ENSMUSG00000029610	Aimp2	-0.368575	0.000193865	62.53	63.16	51.64	47.04
ENSMUSG00000005893	Nr2c2	-0.368472	0.00164341	7.32	7.05	5.77	5.61
ENSMUSG00000038102	Trappc11	-0.368263	2.43123e-06	19.49	19.76	15.71	15.21
ENSMUSG00000034173	Chchd2l	-0.368099	0.0737048	7.22	7.45	5.69	5.88
ENSMUSG00000035934	Pknox2	-0.367875	0.442285	1.36	1.61	1.11	1.25
ENSMUSG00000002603	Tgfb1	-0.367483	0.211944	5.06	5.63	3.95	4.49
ENSMUSG00000021569	Trip13	-0.367384	4.86489e-05	20.36	21.19	15.94	16.88
ENSMUSG00000055235	Wdr86	-0.367273	0.11144	6.48	7.23	5.62	5.22
ENSMUSG00000071266	Zfp946	-0.367255	0.412939	2.46	1.82	1.72	1.66
ENSMUSG00000027676	Ccdc39	-0.367105	0.478493	1.38	1.21	1.11	0.94
ENSMUSG00000121476	ENSMUSG00000121476	-0.366959	0.153846	5.59	6	4.21	4.93
ENSMUSG00000038346	Zfp384	-0.366944	5.47777e-05	24.07	23.74	18.38	19.26
ENSMUSG00000028656	Cap1	-0.366724	2.049e-13	86.1	88.53	68.42	68.71
ENSMUSG00000051469	Zfp24	-0.366339	0.0021959	11.18	12.39	10.1	10.09
ENSMUSG00000031546	Gins4	-0.365101	7.35046e-05	55.53	56.24	43.5	44.84
ENSMUSG00000068522	Aard	-0.364887	0.0785858	15.68	15.99	11.79	13.23
ENSMUSG00000093798	Gm8355	-0.364667	0.53149	2.08	2.26	1.84	1.59
ENSMUSG00000024325	Ring1	-0.364444	0.194373	5.71	6.01	4.62	4.65
ENSMUSG00000037349	Nudt22	-0.364434	0.216269	13.03	14.69	10.71	11.21
ENSMUSG00000037361	Sf3b6	-0.3644	0.0120516	32.5	36.31	26.26	28.16
ENSMUSG00000043621	Ubxn10	-0.364377	0.462178	1.61	1.77	1.33	1.35
ENSMUSG00000025484	Bet1l	-0.36409	0.202828	5.67	6.53	4.79	5.11
ENSMUSG00000053137	Mapk11	-0.364007	0.38712	2.62	2.55	2.1	1.99
ENSMUSG00000037148	Arhgap10	-0.363998	0.23636	3.21	3.31	2.73	2.48
ENSMUSG00000022554	Hgh1	-0.363523	0.0260353	14.64	14.35	10.76	12.17
ENSMUSG00000038517	Tbkbp1	-0.363489	0.0491205	6.26	6.38	5.18	4.96
ENSMUSG00000005510	Ndufs3	-0.363139	0.000846054	58.51	59.45	48.13	45.29
ENSMUSG00000002881	Nab1	-0.363095	0.389888	1.58	1.55	1.22	1.27
ENSMUSG00000024180	Pgap6	-0.363056	1.89797e-07	34.31	36.38	28.19	27.93
ENSMUSG00000034190	Chmp7	-0.362911	4.44662e-05	26.31	26.16	20.69	20.87
ENSMUSG00000025931	Paqr8	-0.362846	0.0771974	3.48	3.15	2.66	2.57
ENSMUSG00000026784	Pdss1	-0.362677	0.0901684	12.29	11.12	9.37	9.16
ENSMUSG00000039194	Rlbp1	-0.362448	0.381125	2.98	3.51	2.49	2.66
ENSMUSG00000095180	Rhox5	-0.361715	0.00217373	73.87	80.37	57.73	64.25
ENSMUSG00000072940	Gm10443	-0.361638	0.478493	536.89	809.1	656.04	730.7
ENSMUSG00000022012	Enox1	-0.361304	0.0161528	9.89	10.91	7.86	8.64
ENSMUSG00000058447	Gm26920	-0.361278	0.867562	1.54	2.93	0.94	2.6
ENSMUSG00000048905	Bnip5	-0.360885	0.161027	2.77	2.64	2.14	2.15
ENSMUSG00000073838	Tufm	-0.360788	3.06731e-13	151.95	154.98	121.2	122.4
ENSMUSG00000025218	Poll	-0.360328	0.0455906	9.64	9.62	7.61	7.67
ENSMUSG00000112348	Gm36634	-0.360187	0.647523	2.17	2.65	1.77	2.05
ENSMUSG00000041390	Mdfic	-0.360112	0.266901	2.94	3.35	2.65	2.66
ENSMUSG00000021636	Marveld2	-0.359412	0.459202	1.64	1.81	1.32	1.3
ENSMUSG00000064289	Tank	-0.359369	0.407252	2.79	2.89	2.18	2.28
ENSMUSG00000002458	Rgs19	-0.359062	0.0936128	14.7	16.52	12.59	12.48
ENSMUSG00000027463	Slc52a3	-0.358636	0.167019	4.91	5.32	4.04	4.21
ENSMUSG00000025791	Pgm1	-0.358613	0.00146981	22.71	25.62	18.65	19.76
ENSMUSG00000024666	Tmem138	-0.358551	0.176771	8.59	8.91	7.09	6.8
ENSMUSG00000032288	Imp3	-0.358461	0.00209673	65.39	73.22	55.04	55.02
ENSMUSG00000025324	Atp10a	-0.35722	0.158431	2.35	2.52	2.05	1.83
ENSMUSG00000035678	Tnfsf9	-0.356939	0.557725	3.26	3.45	2.54	2.79
ENSMUSG00000019823	Mical1	-0.356812	0.0117094	8.85	8.7	6.85	7.11
ENSMUSG00000045071	E130308A19Rik	-0.356788	0.0236725	4.02	3.59	3.18	2.91
ENSMUSG00000024271	Elp2	-0.356769	6.57182e-09	48.47	48.94	41.07	36.64
ENSMUSG00000027997	Casp6	-0.356314	0.319597	6.01	6.41	4.74	5.14
ENSMUSG00000035203	Epn1	-0.35617	6.28197e-07	47.97	47.12	37.04	38.18
ENSMUSG00000052299	Ltn1	-0.35612	3.90942e-07	14.17	14.38	11.27	11.57
ENSMUSG00000030134	Rasgef1a	-0.356038	0.491989	1.69	1.65	1.51	1.21
ENSMUSG00000021911	Parg	-0.355587	4.11188e-05	20.86	19.3	15.79	16.24
ENSMUSG00000074825	Itpripl1	-0.354495	0.230904	3.79	4.27	3.24	3.11
ENSMUSG00000037003	Tns2	-0.354153	0.349493	1.55	1.57	1.36	1.14
ENSMUSG00000021196	Pfkp	-0.353781	2.80902e-12	71.81	72.58	58.72	54.9
ENSMUSG00000005615	Pcyt1a	-0.353765	0.015154	7.25	8.06	6.68	5.31
ENSMUSG00000073197	5730507C01Rik	-0.353758	0.148365	5.82	6.37	4.73	5.02
ENSMUSG00000031309	Rps6ka3	-0.353589	0.0155493	4.19	4.38	3.97	3.88
ENSMUSG00000020387	Jade2	-0.353353	0.036969	4	3.89	3.33	2.97
ENSMUSG00000025103	Btbd1	-0.353169	0.00665059	12.42	12.79	9.71	10.4
ENSMUSG00000025374	Nabp2	-0.352919	0.00333932	43.46	47.05	35.66	36.34
ENSMUSG00000020911	Krt19	-0.352433	0.501332	3.33	3.45	2.38	3.02
ENSMUSG00000031879	Ciao2b	-0.352207	0.00874707	49.39	52.54	41.99	39.72
ENSMUSG00000033276	Stk36	-0.352014	0.105656	3.17	3.07	2.58	2.38
ENSMUSG00000073411	H2-D1	-0.352008	0.22017	5.97	6.37	4.83	5.27
ENSMUSG00000031425	Plp1	-0.351925	0.566954	1.41	1.24	1.02	0.97
ENSMUSG00000029629	Phf14	-0.351876	0.00166085	14.51	14.58	12.33	11.08
ENSMUSG00000038335	Tsr1	-0.3517	3.79225e-13	84.16	86.13	69.89	66.14
ENSMUSG00000028292	Rars2	-0.351681	0.0134362	17.96	18.76	14.44	14.87
ENSMUSG00000001847	Rac1	-0.351496	2.0315e-07	36.96	38.31	28.65	29.49
ENSMUSG00000042099	Kank3	-0.351288	1.54185e-05	40.55	43.09	33.2	31.77
ENSMUSG00000053565	Eif3k	-0.350603	1.46118e-12	466.2	484.6	386.42	370.82
ENSMUSG00000003131	Pafah1b2	-0.35051	5.82077e-05	19.51	21.05	13.9	17.16
ENSMUSG00000029176	Anapc4	-0.349833	0.000278744	15.47	16.07	12.43	12.79
ENSMUSG00000032806	Slc10a3	-0.349535	0.466189	3.07	2.85	2.13	2.55
ENSMUSG00000019969	Psen1	-0.349078	0.00267201	17.75	19.15	14.15	15.34
ENSMUSG00000020346	Mgat1	-0.348721	0.00929657	13.71	13.18	10.38	11.02
ENSMUSG00000069208	Zfp825	-0.34865	0.396176	7.14	6.17	4.09	6.37
ENSMUSG00000019715	Gle1	-0.348571	6.72614e-05	17.69	17.62	14.46	13.81
ENSMUSG00000050029	Rap2c	-0.34823	0.0414479	6.73	7.2	5.39	5.76
ENSMUSG00000062380	Tubb3	-0.347563	6.69391e-08	79.53	80.82	66.19	62.23
ENSMUSG00000016239	Lonrf3	-0.346664	0.611941	1.23	1.15	1.14	0.77
ENSMUSG00000027276	Jag1	-0.346645	0.00300543	7.83	7.38	6.05	6.13
ENSMUSG00000027404	Snrpb	-0.346544	2.49809e-11	288.75	293.08	225.27	240.42
ENSMUSG00000022120	Obi1	-0.345497	0.357887	2.63	2.53	2.17	1.82
ENSMUSG00000101523	Csnk2a1-ps3	-0.345389	0.543139	1.7	1.73	1.6	1.18
ENSMUSG00000067931	Zfp948	-0.345317	0.381127	2.96	2.59	2.12	2.32
ENSMUSG00000034684	Sema3f	-0.344685	0.568939	1.34	1.38	1.13	1.13
ENSMUSG00000005354	Txn2	-0.34457	6.99203e-06	83.36	86.31	69.68	67.45
ENSMUSG00000078153	Psme2b	-0.344003	0.620394	5.52	5.57	3.59	5.27
ENSMUSG00000032114	Slc37a4	-0.343441	0.333163	3.85	4.08	3.18	3.02
ENSMUSG00000026427	Eif2d	-0.343292	1.32267e-07	66.84	68.71	55.42	53.76
ENSMUSG00000067924	Rtl8b	-0.343179	0.497713	4.71	4.79	4.06	3.59
ENSMUSG00000032015	Pou2f3	-0.342869	0.33642	3.24	3.28	2.61	2.62
ENSMUSG00000025995	Wdr75	-0.342687	4.35694e-08	47.44	47.17	37.52	38.48
ENSMUSG00000031442	Mcf2l	-0.342461	0.0740037	4.52	4.16	3.59	3.59
ENSMUSG00000090935	Synj2bp	-0.34159	0.0263697	7.54	6.99	5.46	5.53
ENSMUSG00000025737	Wdr24	-0.341402	0.00313711	15.54	14.87	12.7	11.76
ENSMUSG00000025759	Mfsd8	-0.340713	0.515609	1.72	1.83	1.74	1.12
ENSMUSG00000074283	Zfp109	-0.340713	0.515609	2.25	2.33	2.32	1.45
ENSMUSG00000023170	Gps2	-0.340595	0.0193551	30.77	31.45	24.48	24.81
ENSMUSG00000028381	Ugcg	-0.340424	0.00115136	12.92	12.74	10.23	10.43
ENSMUSG00000051427	Ccdc157	-0.340278	0.131596	3.04	3.08	2.46	2.47
ENSMUSG00000049036	Tmem121	-0.339635	0.466278	3.77	4.39	3.56	3.02
ENSMUSG00000028416	Bag1	-0.339342	1.98816e-05	75.82	75.3	59.85	61.71
ENSMUSG00000030446	Zfp273	-0.338515	0.440286	2.71	2.64	2.16	2.24
ENSMUSG00000021548	Ccnh	-0.337957	0.0233006	16.72	17.03	13.85	13.5
ENSMUSG00000032309	Fbxo22	-0.337583	2.70051e-07	69.62	71.02	55.02	58.42
ENSMUSG00000090470	Prr23a3	-0.337467	0.44518	3.86	3.42	3.1	2.77
ENSMUSG00000007946	Phox2a	-0.337452	0.669608	1.73	2.14	1.25	1.86
ENSMUSG00000032042	Srpr	-0.337121	7.14569e-11	70.82	71.04	56.68	57.74
ENSMUSG00000021318	Gli3	-0.337076	0.0454207	2.99	2.83	2.41	2.81
ENSMUSG00000071645	Tut1	-0.336704	0.000223021	26.69	26.9	22.52	20.74
ENSMUSG00000030823	9130019O22Rik	-0.336111	0.521268	1.38	1.25	0.95	1.07
ENSMUSG00000044285	Ubb-ps	-0.33587	0.00865009	64.26	71.49	59.68	50.42
ENSMUSG00000020640	Itsn2	-0.335815	0.00118002	9.51	9.16	7.86	7.22
ENSMUSG00000027551	Zfp64	-0.335738	5.72391e-05	34.34	33.99	28.04	27.66
ENSMUSG00000030534	Vps33b	-0.335646	0.0861516	8.4	9.05	6.58	7.5
ENSMUSG00000055745	Rtl6	-0.335481	0.468957	1.34	1.4	1.28	0.93
ENSMUSG00000038390	Gpr162	-0.335096	0.543107	1.83	1.67	1.25	1.58
ENSMUSG00000035248	Tut7	-0.33472	0.00386878	9.97	9.31	7.37	7.89
ENSMUSG00000027411	Vps16	-0.334602	0.00146583	18.77	19.07	16.16	14.44
ENSMUSG00000038507	Parp12	-0.334385	0.400626	2.14	2.2	1.83	1.67
ENSMUSG00000028069	Gpatch4	-0.334114	0.00749229	27.07	28.54	21.7	23.13
ENSMUSG00000009585	Apobec3	-0.334051	1.08491e-05	50.99	53.65	41.6	42.48
ENSMUSG00000031352	Hccs	-0.334014	0.0490799	11.81	11.31	8.77	9.81
ENSMUSG00000038563	Efl1	-0.333662	0.005372	13.2	12.46	10.94	9.85
ENSMUSG00000034758	Tle6	-0.333352	0.302317	4.98	5.04	3.92	4.16
ENSMUSG00000049097	Ankrd34a	-0.333212	0.636483	1.18	1.21	0.97	0.96
ENSMUSG00000031137	Fgf13	-0.332936	0.660333	1.15	1.24	0.98	0.86
ENSMUSG00000007603	Dus3l	-0.332764	1.08678e-05	55.61	52.5	44.64	42.8
ENSMUSG00000024140	Epas1	-0.332743	3.03077e-05	17.38	18.01	13.71	14.91
ENSMUSG00000032231	Anxa2	-0.332378	0.556482	3.21	3.45	2.79	2.6
ENSMUSG00000002741	Ykt6	-0.331953	1.78428e-07	59.92	61.69	50.82	47.66
ENSMUSG00000007050	Lsm2	-0.331946	0.00733451	74.98	75.08	56.86	63.85
ENSMUSG00000036721	Zscan12	-0.331699	0.194373	5.24	5.52	4.1	4.43
ENSMUSG00000017307	Acot8	-0.331322	0.10675	19.33	21.32	16.32	16.51
ENSMUSG00000097277	2900076A07Rik	-0.331085	0.688444	1.67	1.21	1.09	1.24
ENSMUSG00000010064	Slc38a3	-0.331043	0.461023	2.69	2.42	2.35	1.85
ENSMUSG00000021486	Prelid1	-0.3308	1.08242e-11	101.6	105.8	83.63	84.4
ENSMUSG00000004054	Map3k11	-0.330677	0.00641195	11.38	10.76	8.7	9.23
ENSMUSG00000022754	Tmem45a	-0.330611	0.444079	2.3	2.39	1.85	1.95
ENSMUSG00000034820	Cpsf7	-0.330595	1.90686e-05	28.33	27.7	22.02	22.83
ENSMUSG00000027247	Arhgap1	-0.329938	0.000262397	26.9	28.72	23.75	21.45
ENSMUSG00000020260	Pofut2	-0.329773	0.0207601	15.26	14.51	12.32	11.82
ENSMUSG00000028992	Nmnat1	-0.329505	0.442628	4.22	5.05	3.68	3.95
ENSMUSG00000075304	Sp5	-0.329419	0.418832	3.41	3.32	2.69	2.77
ENSMUSG00000026281	Dtymk	-0.329002	8.70845e-10	242.2	246.3	196.9	198.67
ENSMUSG00000032373	Car12	-0.328984	0.400626	2.07	1.86	1.62	1.54
ENSMUSG00000121043	ENSMUSG00000121043	-0.328788	0.373347	3.47	3.61	2.71	3.03
ENSMUSG00000004771	Rab11a	-0.32854	0.00787799	24.41	25.87	17.79	21.53
ENSMUSG00000041642	Kif21b	-0.328266	0.0185678	3.39	3.52	2.79	2.82
ENSMUSG00000031862	Atp13a1	-0.327959	2.70051e-07	33.39	33.45	27.54	26.73
ENSMUSG00000021428	Riok1	-0.327672	0.0278488	11.99	12.9	9.58	10.62
ENSMUSG00000025225	Nfkb2	-0.327123	0.0718996	7.64	7.44	5.99	6.45
ENSMUSG00000048440	Cyp4f16	-0.326926	0.109387	9.19	9.74	7.22	8.15
ENSMUSG00000015745	Plekho1	-0.326753	0.679008	1.67	1.29	1.13	1.27
ENSMUSG00000079009	Gm14139	-0.325698	0.193264	9.6	8.76	7.21	7.67
ENSMUSG00000045763	Basp1	-0.325654	0.00319685	30.28	29.54	23.47	25.12
ENSMUSG00000018909	Arrb1	-0.325603	0.0727944	3.47	3.26	2.64	2.79
ENSMUSG00000026781	Acbd5	-0.325515	0.0279325	9.3	9.89	7.56	7.34
ENSMUSG00000007872	Id3	-0.325449	0.13989	17.89	18.85	13.42	16.39
ENSMUSG00000057895	Zfp105	-0.325402	0.324935	4.71	5.63	4.15	4.27
ENSMUSG00000001380	Hars	-0.324996	5.30039e-06	57.14	56.59	46.84	45.66
ENSMUSG00000036537	Rnf113a1	-0.324769	0.489813	5.97	5.33	5.01	4.19
ENSMUSG00000051034	Zfp11	-0.324334	0.51741	1.48	1.32	0.97	1.3
ENSMUSG00000054237	Fra10ac1	-0.324204	0.125381	16.55	14.64	12.94	12.42
ENSMUSG00000039910	Cited2	-0.324105	0.00611274	24.91	23.73	19.14	20.4
ENSMUSG00000030613	Ccdc90b	-0.324084	0.165106	10.78	12.29	9.25	9.57
ENSMUSG00000021403	Serpinb9b	-0.323937	0.492553	1.65	1.78	1.35	1.43
ENSMUSG00000113911	Gm21930	-0.323805	0.379024	8.52	9.73	7.05	7.81
ENSMUSG00000070473	Cldn3	-0.323736	0.432552	7.24	5.98	5.5	5.25
ENSMUSG00000038214	Bend3	-0.323565	0.000248066	12.92	12.07	10.45	9.88
ENSMUSG00000039033	Tasp1	-0.323305	0.317714	5.34	4.71	4.6	3.58
ENSMUSG00000002731	Prkra	-0.322863	0.271741	7.36	8.01	6.43	6.1
ENSMUSG00000107283	Mpv17	-0.32253	0.0269914	28.78	30.6	24.91	25.83
ENSMUSG00000002504	Slc9a3r2	-0.3221	0.045104	13.63	14.98	11.72	11.19
ENSMUSG00000037628	Cdkn3	-0.322051	0.667465	3.07	4.33	2.87	2.68
ENSMUSG00000050192	Eif5a2	-0.321993	0.176155	2.86	2.99	2.35	2.42
ENSMUSG00000024382	Ercc3	-0.321699	0.000168743	29.06	30.17	24.58	23.72
ENSMUSG00000051243	Islr2	-0.321633	0.307737	2.43	3.05	2.17	2.31
ENSMUSG00000024732	Ccdc86	-0.321407	0.00891522	14.03	14.02	11.15	11.72
ENSMUSG00000038250	Usp38	-0.321335	0.00351273	12.79	12.17	10.87	9.5
ENSMUSG00000035824	Tk2	-0.321232	0.254697	5.41	5.03	4.46	4.17
ENSMUSG00000095990	Zfp97	-0.321121	0.123856	7.57	9.1	7.12	6.49
ENSMUSG00000034303	Ccdc15	-0.321112	0.519171	1.74	1.5	1.39	1.4
ENSMUSG00000034748	Sirt6	-0.321091	0.0103559	24.14	26.1	19.91	20.87
ENSMUSG00000055102	Zfp819	-0.321042	0.0620651	11.36	11.07	9.61	8.69
ENSMUSG00000044037	Als2cl	-0.320845	0.116009	4.44	3.74	3.31	3.37
ENSMUSG00000041638	Gcn1	-0.320596	1.96759e-12	39.08	37.87	32.13	30.66
ENSMUSG00000038718	Pbx3	-0.320399	0.551709	1.91	2.04	1.35	1.83
ENSMUSG00000025135	Anapc11	-0.320281	3.94367e-05	113.59	119.83	90	90.3
ENSMUSG00000060600	Eno3	-0.320274	0.217771	11.31	13.42	11.12	9.16
ENSMUSG00000081752	Sms-ps	-0.32007	0.595718	4.57	4.28	3.84	3.37
ENSMUSG00000090363	Gm3512	-0.319935	0.617252	2.01	2.86	1.7	2.29
ENSMUSG00000049823	Zbtb12	-0.319916	0.0474914	15.7	16.84	12.98	13.58
ENSMUSG00000022575	Gsdmd	-0.319798	0.644643	1.89	1.94	1.55	1.57
ENSMUSG00000074754	Smim26	-0.319667	0.684871	14.25	14.24	9.41	13.61
ENSMUSG00000079083	Jrkl	-0.319602	0.589598	1.39	1.33	1.3	0.92
ENSMUSG00000032570	Atp2c1	-0.319571	4.37326e-05	25.16	24.96	21.14	19.13
ENSMUSG00000020437	Myo1g	-0.319451	0.48985	1.81	1.66	1.41	1.42
ENSMUSG00000029840	Mtpn	-0.319432	4.31844e-05	30.28	30.34	23.32	26.16
ENSMUSG00000027131	Emc4	-0.319269	0.0142365	48.7	49.63	40.5	39.73
ENSMUSG00000078919	Dpm1	-0.319066	0.662326	1.91	2.21	1.35	1.83
ENSMUSG00000027245	Hypk	-0.318844	0.00114862	75.1	76.28	55.87	60.83
ENSMUSG00000061461	Smim20	-0.318378	0.269672	16.52	16.2	13.23	13.47
ENSMUSG00000044461	Shisa2	-0.318283	0.414797	2.72	2.33	1.89	2.22
ENSMUSG00000018209	Stk4	-0.318255	5.6298e-06	20.23	20.58	16.79	16.51
ENSMUSG00000032470	Mras	-0.318245	0.0445007	15.91	16.88	13.23	12.65
ENSMUSG00000047721	Bola2	-0.318096	0.00594735	46.52	48.91	36.81	38.65
ENSMUSG00000034429	Zfp707	-0.31805	0.435935	3.86	4.73	3.39	3.56
ENSMUSG00000040875	Osbpl10	-0.317884	0.215897	6.29	6	5.06	4.99
ENSMUSG00000032534	Cep63	-0.317879	0.226065	5.75	5.11	4.38	4.44
ENSMUSG00000121485	ENSMUSG00000121485	-0.31714	0.342272	6.87	5.19	4.46	5.44
ENSMUSG00000029769	Ccdc136	-0.317007	0.0184207	11.08	10.82	8.95	8.96
ENSMUSG00000010054	Tusc2	-0.316583	0.0939432	14.53	16.56	11.9	12.91
ENSMUSG00000025156	Gps1	-0.316578	2.72521e-11	154.83	152.32	127.23	122.82
ENSMUSG00000000730	Dnmt3l	-0.316467	5.82403e-08	106.51	109.08	88.24	88.18
ENSMUSG00000051335	Gfod1	-0.316349	0.38087	1.1	1.34	0.96	1.05
ENSMUSG00000085412	Halr1	-0.315915	0.372534	2.78	2.9	2.53	2.03
ENSMUSG00000022623	Shank3	-0.315368	0.281127	2.71	2.68	1.92	2.15
ENSMUSG00000035575	Utp6	-0.314627	1.05035e-11	69.01	69.18	56.7	56.56
ENSMUSG00000052928	Ctif	-0.314361	0.344157	1.64	1.48	1.19	1.37
ENSMUSG00000021765	Fst	-0.314063	0.500886	3.13	2.63	2.42	2.24
ENSMUSG00000066258	Trim12a	-0.313643	0.527372	4.2	4.24	3.93	3
ENSMUSG00000030330	Ing4	-0.313619	0.0412726	21.13	21.34	18.25	16.65
ENSMUSG00000019837	Gtf3c6	-0.312947	0.00870289	34.03	33.74	27.19	29.49
ENSMUSG00000092569	Gm20544	-0.312775	0.401611	4.26	4.32	3.88	3.16
ENSMUSG00000063646	Jakmip1	-0.312708	0.259984	6.39	5.37	5.22	4.53
ENSMUSG00000020258	Glyctk	-0.312526	0.499452	1.47	1.32	1.2	1.11
ENSMUSG00000000776	Polr3d	-0.312189	0.0281505	19.89	20.7	15.51	17.78
ENSMUSG00000020389	Cdkl3	-0.312159	0.611908	1.97	1.8	1.45	1.75
ENSMUSG00000064032	Gm10143	-0.311739	0.582976	1.29	1.32	1.12	1.02
ENSMUSG00000050822	Slc29a4	-0.311578	0.18608	5.64	5.7	4.71	4.61
ENSMUSG00000066632	Pgk1-rs7	-0.311578	0.233712	15.61	14.87	14.16	10.89
ENSMUSG00000066000	Zfp979	-0.311467	5.7679e-06	46.22	47.5	38.84	38.09
ENSMUSG00000036751	Cox6b1	-0.311004	7.71953e-06	338.3	356.7	283.79	286.79
ENSMUSG00000028076	Cd1d1	-0.310619	0.606382	2.25	2.2	1.66	1.99
ENSMUSG00000048636	A730049H05Rik	-0.310338	0.586954	2.02	2.3	1.66	1.87
ENSMUSG00000042097	Zfp239	-0.31033	0.285794	4.2	3.7	3.28	3.3
ENSMUSG00000078570	1110065P20Rik	-0.309808	0.404081	19.85	17.29	12.85	17.65
ENSMUSG00000000374	Trappc10	-0.309674	0.0351786	6.33	6.09	5.27	4.94
ENSMUSG00000066894	Vsig10	-0.309547	0.229966	3.22	3.15	2.54	2.7
ENSMUSG00000040621	Gemin8	-0.30952	0.361034	5.8	7.41	6.05	5.38
ENSMUSG00000041837	Pdcd7	-0.309454	0.0294002	14.3	15.24	12.46	11.85
ENSMUSG00000000339	Rtca	-0.309288	0.00575475	34.15	36.38	28.86	29.13
ENSMUSG00000024007	Ppil1	-0.309184	4.69508e-06	98.98	99.53	79.8	83.32
ENSMUSG00000051747	Ttn	-0.308918	1.35352e-05	1.72	1.6	1.43	1.31
ENSMUSG00000053646	Plxnb1	-0.308592	0.000668246	7.71	7.85	6.55	6.25
ENSMUSG00000005718	Tfap4	-0.307538	0.0331703	15.27	15.17	12.83	12.23
ENSMUSG00000000409	Lck	-0.306939	0.0727944	12.35	12.97	10.73	10.27
ENSMUSG00000037007	Zfp113	-0.306596	0.40323	1.52	1.91	1.33	1.27
ENSMUSG00000112964	E430024I08Rik	-0.306518	0.151747	6.68	6.51	5.84	5.05
ENSMUSG00000019261	Map1s	-0.306249	2.75049e-05	32.37	32.73	27.52	26.14
ENSMUSG00000120224	2810001A02Rik	-0.306065	0.574782	12.12	13.19	8.41	12.33
ENSMUSG00000035637	Grhpr	-0.305997	0.0019818	57.13	58.34	46.3	48.77
ENSMUSG00000030329	Pianp	-0.305599	0.124705	9.83	11.16	8.92	8.59
ENSMUSG00000005150	Wdr83	-0.305468	0.217328	15.98	18.46	12.81	15.56
ENSMUSG00000087009	Nphs1os	-0.305357	0.615482	3.42	3.45	2.66	3
ENSMUSG00000073433	Arhgdig	-0.305313	0.605415	4.68	5.9	4.64	4.09
ENSMUSG00000070643	Sox13	-0.304894	0.000498076	20.89	21	17.32	17.07
ENSMUSG00000027940	Tpm3	-0.304885	1.29834e-16	271.43	264.87	221.61	219.95
ENSMUSG00000038696	Mapkap1	-0.304564	0.0374136	11.49	10.93	9.76	9.42
ENSMUSG00000086096	Gm12688	-0.3045	0.704062	2.64	2.93	2	2.58
ENSMUSG00000022967	Ifnar1	-0.304362	0.00748967	12.33	12.94	10.2	10.57
ENSMUSG00000036873	2410004B18Rik	-0.304213	0.224569	12.92	11.31	9.15	10.8
ENSMUSG00000065990	Aurkaip1	-0.304203	0.000579082	92.4	96.49	74.32	78.7
ENSMUSG00000041037	Irgq	-0.304185	0.11546	3.4	3.29	2.7	2.82
ENSMUSG00000102070	Gm28661	-0.303936	0.890946	1045.09	2007.87	658.73	1841.91
ENSMUSG00000031392	Irak1	-0.303811	0.00970444	12.83	13.4	10.55	11.22
ENSMUSG00000030469	Zfp719	-0.303757	0.253842	2.79	3.18	2.42	2.51
ENSMUSG00000104913	Gm6560	-0.303608	0.462178	4.7	4.98	3.96	4.02
ENSMUSG00000019054	Fis1	-0.303373	0.0124208	73.17	74.75	58.92	59.96
ENSMUSG00000048376	F2r	-0.303218	0.0145293	12.4	13.25	10.63	10.56
ENSMUSG00000027011	Ube2e3	-0.30308	0.0473695	15.5	16.41	12.03	13.88
ENSMUSG00000092607	Scnm1	-0.302837	0.0768605	33.43	32.17	29.2	27.23
ENSMUSG00000121300	Gm1070	-0.302731	0.491989	2.31	2.56	1.77	2.25
ENSMUSG00000034336	Ina	-0.302638	0.0214496	11.64	11.65	9.77	9.48
ENSMUSG00000043998	Mgat2	-0.30225	0.0263697	13.89	14.51	11.82	11.64
ENSMUSG00000031917	Nip7	-0.301914	2.60504e-05	41.84	39.93	31.46	32.22
ENSMUSG00000032966	Fkbp1a	-0.301869	8.53677e-09	155.94	161.85	129.1	133.46
ENSMUSG00000038637	Lrrc56	-0.301566	0.491443	2.99	3.07	2.66	2.3
ENSMUSG00000024538	Ppic	-0.301454	0.0866547	21.27	20.66	16.54	18.07
ENSMUSG00000025439	Clns1a	-0.301337	5.3303e-07	113.41	114.61	95.13	93.34
ENSMUSG00000026095	Asnsd1	-0.301242	0.000532405	32.88	32.58	27.73	27.18
ENSMUSG00000018648	Dusp14	-0.30119	0.332921	8.05	9.79	7.36	7.46
ENSMUSG00000028212	Ccne2	-0.301123	0.22081	5.27	5.31	4.62	4.14
ENSMUSG00000009640	Dmap1	-0.30107	0.0323092	24.41	24.37	19.94	20.37
ENSMUSG00000023018	Smarcd1	-0.300819	4.54911e-07	53.66	54.28	43.34	45.92
ENSMUSG00000028684	Urod	-0.300769	0.00505416	42.44	46.17	36	37.27
ENSMUSG00000027274	Mkks	-0.300637	0.23163	4.84	4.89	4.06	3.98
ENSMUSG00000028455	Stoml2	-0.300488	4.39598e-07	93.93	95.83	77.27	79.66
ENSMUSG00000045333	Zfp423	-0.300486	0.24308	3.02	3.13	2.78	2.37
ENSMUSG00000027087	Itgav	-0.300034	0.0277357	5.46	5.28	4.71	4.19
ENSMUSG00000032495	Lrrc2	-0.299987	0.196	4.5	4.31	3.61	3.69
ENSMUSG00000018326	Ywhab	-0.299837	2.13193e-08	66.08	67.17	54.84	55.45
ENSMUSG00000060288	Ppih	-0.299807	0.0322164	62	68.82	50.4	55.4
ENSMUSG00000033075	Senp1	-0.299798	0.000143918	18.08	18.08	15.22	13.71
ENSMUSG00000048012	Zfp473	-0.299713	0.0279763	9.58	10.21	8.27	7.88
ENSMUSG00000050106	Tmc8	-0.299393	0.244753	5.82	5.66	4.43	5.07
ENSMUSG00000037938	Chchd5	-0.298552	0.134249	17.62	18.58	15.14	14.84
ENSMUSG00000075701	Selenos	-0.298235	0.185635	18	17.03	14.2	14.78
ENSMUSG00000073889	Il11ra1	-0.298082	0.668352	1.72	2.41	1.75	1.79
ENSMUSG00000015023	Ddx19a	-0.297965	0.000138525	38.91	38.22	31.31	32.59
ENSMUSG00000020277	Pfkl	-0.297477	2.78624e-11	100.1	105.04	86.17	83.96
ENSMUSG00000026694	Eef1aknmt	-0.297381	0.15428	4.23	4.14	3.62	3.32
ENSMUSG00000095315	Gm10130	-0.297276	0.157878	10.23	9.19	7.87	8.22
ENSMUSG00000045757	Zfp764	-0.296975	0.584572	1.82	2.1	1.62	1.63
ENSMUSG00000035171	1110059E24Rik	-0.296889	0.0979101	16.55	18.31	14.94	14.19
ENSMUSG00000036908	Unc93b1	-0.296732	0.521934	3.07	2.64	2.31	2.4
ENSMUSG00000039148	Sart1	-0.2967	5.02505e-07	33.57	32.35	26.89	27.78
ENSMUSG00000038685	Rtel1	-0.296618	1.26336e-05	28.63	28.34	24.27	22.99
ENSMUSG00000040929	Rfx3	-0.296332	0.302368	1.86	1.69	1.54	1.28
ENSMUSG00000024913	Lrp5	-0.296237	7.90598e-05	20.16	19.52	16.87	16.01
ENSMUSG00000036086	Zranb3	-0.296199	0.00677189	11.77	11.93	9.91	9.74
ENSMUSG00000089857	Zfp882	-0.295975	0.406839	2.92	2.89	2.65	2.17
ENSMUSG00000036188	Ankmy2	-0.295791	0.0431342	14.62	13.97	12.34	11.4
ENSMUSG00000070526	Peg12	-0.295779	0.620205	1.58	1.91	1.68	1.23
ENSMUSG00000055681	Cope	-0.29571	0.000781734	71.1	70.57	57.22	60.25
ENSMUSG00000063838	Cdc42ep5	-0.295587	0.414797	10.01	10.95	8.84	8.56
ENSMUSG00000042178	Armc5	-0.295511	0.190865	4.63	4.63	4.11	3.58
ENSMUSG00000057286	St6galnac2	-0.295274	0.204661	4.68	5.03	3.74	4.32
ENSMUSG00000058793	Cds2	-0.295101	3.59013e-10	34.06	34.1	28.11	27.84
ENSMUSG00000053907	Mat2a	-0.294978	7.60645e-12	120.76	123.49	101.1	99.19
ENSMUSG00000047824	Pygo2	-0.294618	0.000827738	27.6	26.72	23.66	21.57
ENSMUSG00000025450	Gm9752	-0.294521	0.66402	1.27	1.52	1.33	1
ENSMUSG00000035726	Supt16	-0.294323	4.42072e-14	93	92.07	77.23	76.56
ENSMUSG00000050721	Plekho2	-0.294227	0.270486	3.94	4.42	3.45	3.5
ENSMUSG00000021254	Gpatch2l	-0.294019	0.140176	4.99	5.28	4.49	4.13
ENSMUSG00000093803	Ppp2r3d	-0.293857	0.304657	3.31	2.9	2.46	2.7
ENSMUSG00000006390	Elovl1	-0.293813	0.196731	12.76	13.61	11.74	10.22
ENSMUSG00000006218	Fam131c	-0.293796	0.59557	4.36	3.41	3.13	3.31
ENSMUSG00000063108	Zfp26	-0.293572	0.0116997	4.73	4.25	3.85	3.62
ENSMUSG00000066798	Zbtb6	-0.293411	0.192841	3.8	3.78	3.27	2.92
ENSMUSG00000023902	Zscan10	-0.293338	5.02727e-07	73.71	75.2	63.73	60.35
ENSMUSG00000017969	Ptgis	-0.293319	0.143937	10.12	10.23	8.44	8.47
ENSMUSG00000020955	Ap4s1	-0.293038	0.543523	6.68	7.19	6.05	5.49
ENSMUSG00000041684	Bivm	-0.292614	0.230224	4.2	4.58	3.6	3.78
ENSMUSG00000047261	Gap43	-0.292359	0.682838	2.79	2.44	2.43	1.92
ENSMUSG00000068417	Pnp2	-0.291934	0.377907	8.72	8.03	7.27	6.66
ENSMUSG00000027412	Lpin3	-0.291876	0.44289	2.6	2.19	1.95	2.05
ENSMUSG00000040648	Ppip5k2	-0.291815	0.000154993	18.5	16.94	14.9	14.36
ENSMUSG00000026843	Fubp3	-0.291664	6.53676e-07	47.74	47.53	39.75	40.07
ENSMUSG00000001228	Uhrf1	-0.29165	4.47654e-16	202.03	203	171.25	164.74
ENSMUSG00000045273	Cenph	-0.291437	0.0399646	33.97	32.57	27.18	28.15
ENSMUSG00000037997	Parp11	-0.291284	0.36083	3.1	2.92	2.5	2.75
ENSMUSG00000025354	Dnajc14	-0.290813	0.00824589	18.97	18.58	15.17	16.09
ENSMUSG00000025132	Arhgdia	-0.290792	2.92254e-16	376.48	383.31	315.04	317.65
ENSMUSG00000023456	Tpi1	-0.290739	5.74744e-12	304.76	319.66	260.79	259
ENSMUSG00000058192	Zfp846	-0.289923	0.447932	2	2.82	2.31	2.49
ENSMUSG00000035596	Mboat7	-0.289825	0.0164902	16.35	16.77	14.42	13.2
ENSMUSG00000081137	BC022960	-0.28978	0.616228	2.69	2.47	2.14	2.16
ENSMUSG00000050714	Zbtb26	-0.289588	0.278091	3.26	3.46	2.69	2.63
ENSMUSG00000078453	Abracl	-0.289561	0.272334	24.74	22.54	18.27	21.39
ENSMUSG00000000957	Mmp14	-0.289398	0.0443276	14.9	13.84	11.54	12.4
ENSMUSG00000004788	Eif2b2	-0.28904	0.0018212	52.91	49.32	43.11	42.09
ENSMUSG00000028833	Ncdn	-0.288783	0.00335553	16.57	16.81	14.2	13.84
ENSMUSG00000022890	Atp5j	-0.288767	0.00205408	173.67	183.4	139.65	157.88
ENSMUSG00000000916	Nsun5	-0.288726	0.0576778	15.04	15.65	12.28	13.31
ENSMUSG00000041703	Zic5	-0.288517	0.0134362	9.61	10.27	8.24	8.36
ENSMUSG00000048222	Mfap1b	-0.288374	0.0025906	23.15	21.38	18.03	19.11
ENSMUSG00000078932	CN725425	-0.288285	0.73573	1.56	1.3	1.49	0.91
ENSMUSG00000038319	Kcnh2	-0.288222	0.203156	4.36	3.98	3.47	3.57
ENSMUSG00000024999	Noc3l	-0.28789	0.00111247	23.02	20.99	18.02	18.68
ENSMUSG00000063229	Ldha	-0.287884	6.11699e-16	903.15	956.53	780.62	771.06
ENSMUSG00000007034	Slc44a4	-0.287881	0.540459	3.2	2.6	2.32	2.49
ENSMUSG00000018841	Rad51d	-0.287754	0.0944571	9.3	9.21	7.06	7.56
ENSMUSG00000047123	Ticam1	-0.287695	0.492553	2.31	2.42	1.88	2.07
ENSMUSG00000044562	Rasip1	-0.287599	0.245449	4.68	5.12	4.28	3.91
ENSMUSG00000028798	Eif3i	-0.287466	1.67869e-07	259.03	278.13	222.83	225.28
ENSMUSG00000096458	Moap1	-0.287373	0.415361	7.75	8.38	6.82	6.7
ENSMUSG00000007415	Gatad1	-0.286728	0.00883062	44.96	45.33	37.16	39
ENSMUSG00000024286	Ccny	-0.286706	0.00477648	13.21	11.62	10.25	10.26
ENSMUSG00000003033	Ap1m1	-0.28601	0.0087929	27.7	26.79	23.36	22.18
ENSMUSG00000068922	Msto1	-0.285682	0.000627039	54.11	59.6	47.44	47.57
ENSMUSG00000032583	Mon1a	-0.285675	0.431254	4.18	4.47	3.83	3.51
ENSMUSG00000020407	Upp1	-0.285423	2.29599e-10	335.22	345.48	290.84	277.5
ENSMUSG00000008859	Rala	-0.28536	0.0412711	13.4	14.19	11.69	11.39
ENSMUSG00000030868	Dctn5	-0.285226	0.0178807	33.06	32.59	27.12	27.73
ENSMUSG00000047766	Lrrc49	-0.284824	0.316362	4.22	4.72	3.83	3.62
ENSMUSG00000100862	Gm10925	-0.284647	1.08242e-11	3255.08	3413.24	2924.82	2643.95
ENSMUSG00000025487	Psmd13	-0.28439	1.78847e-07	104.92	108.79	88.75	92.54
ENSMUSG00000039615	Stub1	-0.284258	0.00030183	58.29	56.93	47.5	47.18
ENSMUSG00000087368	BC065397	-0.284165	0.657907	1.3	1.22	1.08	0.91
ENSMUSG00000027475	Kif3b	-0.283921	0.032253	6.72	6.62	5.74	5.43
ENSMUSG00000032322	Pstpip1	-0.283553	0.721345	1.47	1.65	1.33	1.28
ENSMUSG00000024807	Syvn1	-0.283317	0.0191273	13.47	13.74	11.37	11.1
ENSMUSG00000090952	Gm17251	-0.283248	0.698837	2.61	3.86	2.84	2.87
ENSMUSG00000069814	Ccdc92b	-0.283199	0.157878	5.17	5.02	4.22	4.31
ENSMUSG00000116606	Gm10479	-0.283189	0.71638	6.92	6.89	5.86	5.75
ENSMUSG00000034071	Zfp551	-0.283156	0.701074	1.13	1.33	0.94	1.18
ENSMUSG00000032997	Chpf	-0.282659	0.0329069	13.61	13.19	11.34	11.19
ENSMUSG00000036915	Kirrel2	-0.282589	0.0482288	10.6	11.58	9.59	9
ENSMUSG00000027996	Sfrp2	-0.281965	0.680102	1.76	1.87	1.42	1.61
ENSMUSG00000030067	Foxp1	-0.281628	0.0864866	9.51	10.29	8.63	8.12
ENSMUSG00000007837	Prrg2	-0.281474	0.49732	6.06	6.65	5.36	5.75
ENSMUSG00000051855	Mest	-0.281221	8.29953e-05	52.03	56.34	46.29	44.68
ENSMUSG00000078502	Zfp268	-0.281203	0.244753	4.41	5.32	4.08	4.19
ENSMUSG00000060510	Zfp266	-0.281095	0.0036843	12.31	11.11	10.38	8.82
ENSMUSG00000031155	Pim2	-0.280907	0.183024	9.89	10.12	8.35	8.43
ENSMUSG00000063882	Uqcrh	-0.280729	0.00265481	267.8	277.67	221.29	233.79
ENSMUSG00000063785	Utp14a	-0.280517	0.00266211	28.24	28.98	24.48	23.54
ENSMUSG00000002550	Uck1	-0.280075	0.112673	14.81	17.22	12.87	13.99
ENSMUSG00000027822	Slc33a1	-0.279845	0.257664	5.54	4.95	4.28	4.54
ENSMUSG00000037343	Taf2	-0.279804	0.00042563	17.96	18.69	15.62	15.16
ENSMUSG00000043311	D17H6S53E	-0.279471	0.690703	1.76	1.62	1.22	1.61
ENSMUSG00000026578	Ccdc181	-0.279424	0.53638	3.62	3.89	2.84	3.46
ENSMUSG00000022658	Tagln3	-0.279262	0.658747	3.91	3.6	3.44	2.87
ENSMUSG00000002496	Tsc2	-0.279179	1.40552e-06	29.38	28.29	24.21	24.1
ENSMUSG00000045257	Morn2	-0.279172	0.710678	7.5	8.16	5.85	7.3
ENSMUSG00000018171	Vmp1	-0.279134	0.00462297	22.56	23.04	19.15	19.15
ENSMUSG00000084786	Ubl5	-0.279104	0.0180937	227.13	252.42	187.15	197.71
ENSMUSG00000026080	Chst10	-0.278658	0.443988	2.77	2.92	2.31	2.49
ENSMUSG00000021645	Smn1	-0.278629	0.00874485	59.77	55.51	48.23	48.49
ENSMUSG00000027076	Timm10	-0.278498	0.425431	21.01	20.4	17.6	17.11
ENSMUSG00000018559	Ctdnep1	-0.278218	0.0117057	35.28	35.81	30.43	29.3
ENSMUSG00000026289	Atg16l1	-0.278119	0.00348265	23.59	22.34	19.24	19.35
ENSMUSG00000024146	Cript	-0.277698	0.110027	26.74	27.01	21.91	23.21
ENSMUSG00000022683	Pla2g10	-0.27768	0.475992	6.41	6.58	5.37	5.45
ENSMUSG00000040694	Apobec2	-0.27747	0.615482	4.28	3.67	3.07	3.6
ENSMUSG00000060149	BC002059	-0.277118	0.357585	6.02	6.44	4.82	5.65
ENSMUSG00000058709	Egln2	-0.276933	0.00217884	36.68	36.72	31.53	30.54
ENSMUSG00000079008	Gm14124	-0.276735	0.143789	7.7	8.04	6.88	6.36
ENSMUSG00000027296	Itpka	-0.276231	0.0688465	19.01	19.52	15.93	16.47
ENSMUSG00000028795	Ccdc28b	-0.276193	0.668792	5.49	6.51	5.32	4.74
ENSMUSG00000022570	Gfus	-0.275917	0.00769101	50.3	53.12	43.9	43.05
ENSMUSG00000034220	Gpc1	-0.275914	0.102933	6.41	6.24	5.38	5.26
ENSMUSG00000061086	Myl4	-0.27586	0.746496	3.27	4.74	3.27	3.47
ENSMUSG00000006056	Calcoco2	-0.275612	2.37425e-06	124.26	119.2	102.21	102.59
ENSMUSG00000002900	Lamb1	-0.275484	3.43833e-05	21.98	22.24	19.05	18.3
ENSMUSG00000006676	Usp19	-0.27529	7.01685e-10	64.91	65.11	54.8	54.46
ENSMUSG00000025431	Crisp1	-0.275138	0.609799	4.17	4.19	3.11	3.91
ENSMUSG00000025245	Lztfl1	-0.274646	0.357585	2.98	2.98	2.72	2.3
ENSMUSG00000038822	Hace1	-0.274561	0.145366	6.19	6.02	5	5.28
ENSMUSG00000024561	Mbd1	-0.274133	0.201399	6.8	6.79	5.7	5.74
ENSMUSG00000030271	Ogg1	-0.273887	0.285836	10.25	10.92	9.11	8.73
ENSMUSG00000024597	Slc12a2	-0.273811	8.55254e-05	16.97	17.06	14.43	14.27
ENSMUSG00000003346	Abhd17a	-0.273664	0.00190213	64.51	62.45	55.38	51.65
ENSMUSG00000067616	Klk11	-0.27355	0.745519	2.24	2.34	1.81	1.97
ENSMUSG00000020448	Rnf185	-0.273508	0.00899158	21.53	21.76	18.87	17.64
ENSMUSG00000095134	Mid1-ps1	-0.273102	0.492553	7.41	7.37	6.59	5.87
ENSMUSG00000035790	Cep19	-0.273081	0.303793	10.25	9.88	8.88	7.49
ENSMUSG00000032254	Kif23	-0.272858	0.00115136	26.28	28.16	22.71	23.21
ENSMUSG00000073403	Gm10499	-0.272762	0.584256	8.74	8.18	6.27	7.95
ENSMUSG00000002608	Ccdc97	-0.2726	0.00843398	19.56	19.17	16.22	16.44
ENSMUSG00000069678	Pcgf1	-0.272315	0.366119	16.57	17.58	15.53	14.17
ENSMUSG00000021978	Extl3	-0.272135	0.00249801	12.83	12.09	10.45	10.57
ENSMUSG00000000976	Heatr6	-0.271991	0.0173605	10.48	10.31	9.39	8.18
ENSMUSG00000028284	Map3k7	-0.271905	0.000300444	16.8	16.89	14.29	14.16
ENSMUSG00000054418	2900041M22Rik	-0.271691	0.647363	2.51	3.22	2.69	2.16
ENSMUSG00000020993	Trappc6b	-0.271415	0.116519	25.45	26.22	22.88	20.75
ENSMUSG00000038895	Zfp653	-0.27137	0.403955	5.2	5.45	4.3	4.67
ENSMUSG00000049299	Trappc1	-0.271238	0.0451055	77.24	76.24	63.5	65.71
ENSMUSG00000040385	Ppp1ca	-0.271144	3.17614e-09	291	306.47	249.68	254.56
ENSMUSG00000097048	1600020E01Rik	-0.27098	0.727444	5.07	9.3	6.27	7.23
ENSMUSG00000004891	Nes	-0.270934	0.0951505	4.6	4.61	3.77	4
ENSMUSG00000086454	Platr14	-0.270663	0.00507293	60.33	64.5	52.25	52.76
ENSMUSG00000022544	Eef2kmt	-0.270654	0.0902956	15.17	15.88	12.49	13.72
ENSMUSG00000022407	Adsl	-0.270545	0.000172221	61.47	63.98	50.77	54.68
ENSMUSG00000032494	Tdgf1	-0.270539	2.22422e-10	267.96	283.33	232.85	232.78
ENSMUSG00000034403	Pja1	-0.270475	0.0429058	16.83	17.09	13.86	14.12
ENSMUSG00000046000	Naa11	-0.270425	0.573599	1.67	1.89	1.62	1.39
ENSMUSG00000087174	5530601H04Rik	-0.270398	0.46075	4.44	4.83	3.62	4.07
ENSMUSG00000071267	Zfp942	-0.270157	0.296563	5.41	4.52	3.94	4.33
ENSMUSG00000039187	Fanci	-0.269859	2.11643e-05	30.69	31.19	25.75	26.63
ENSMUSG00000025102	3110040N11Rik	-0.269845	0.650653	7.57	6.48	5.19	6.63
ENSMUSG00000030208	Emp1	-0.269586	0.644643	1.89	1.55	1.52	1.38
ENSMUSG00000079003	Samd1	-0.269465	0.00140572	38.63	39.45	32.59	33.39
ENSMUSG00000063802	Hspbp1	-0.269311	0.0161499	42.04	43.31	38.37	33.82
ENSMUSG00000073716	Gm13241	-0.269186	0.674788	7.76	7.22	5.54	7.07
ENSMUSG00000032579	Hemk1	-0.269015	0.497713	3.8	4.03	3.39	3.44
ENSMUSG00000032890	Rims3	-0.268807	0.245902	3.56	3.95	2.42	2.89
ENSMUSG00000098789	Jmjd7	-0.268738	0.275614	14.89	15.96	11.71	14.31
ENSMUSG00000028430	Nol6	-0.268522	1.75957e-09	67.06	67.66	57.59	56.39
ENSMUSG00000044006	Cilp2	-0.268046	0.355178	2.91	2.7	2.39	2.36
ENSMUSG00000018585	Atox1	-0.267604	0.00664717	250.02	274.13	220.03	222.03
ENSMUSG00000055407	Map6	-0.267452	0.41184	3.4	2.96	2.44	2.9
ENSMUSG00000033585	Ndn	-0.267445	0.416836	2.67	2.77	2.24	2.37
ENSMUSG00000035914	Cd276	-0.267364	0.0182437	15.81	17.07	13.86	13.76
ENSMUSG00000086807	Platr21	-0.267311	0.556873	3.42	2.88	3.79	2.72
ENSMUSG00000023143	Nagpa	-0.26724	0.252064	9.82	8.81	8.5	7.29
ENSMUSG00000032952	Ap4b1	-0.267172	0.189413	7.83	8.91	7.17	6.98
ENSMUSG00000017724	Etv4	-0.26714	0.202023	9.55	11.34	9.35	8.38
ENSMUSG00000062309	Rpp25	-0.267106	0.00107826	73.57	75.2	61.75	64.12
ENSMUSG00000022216	Psme1	-0.26693	0.00798612	73.86	73.87	60.38	64.6
ENSMUSG00000036167	Pphln1	-0.266925	0.105952	13.29	15.84	13.63	13.46
ENSMUSG00000040699	Limd2	-0.266726	0.13335	13.43	11.62	13	12.41
ENSMUSG00000034401	Spata6	-0.266687	0.3786	5.31	4.83	4.06	4.37
ENSMUSG00000042211	Fbxo38	-0.266466	0.00126786	22.74	24.7	20.52	19.69
ENSMUSG00000022849	Hspbap1	-0.266263	0.000254554	70.29	72.18	60.52	60.16
ENSMUSG00000034673	Pbx2	-0.26615	0.0054271	29.8	29.37	26.03	25.64
ENSMUSG00000028318	Polr1e	-0.266145	0.0786	16.89	17.17	13.7	15.89
ENSMUSG00000038910	Plcl2	-0.266087	0.614714	1.17	1.28	1.11	0.97
ENSMUSG00000041779	Tram2	-0.265973	0.310438	2.29	2.12	1.99	1.75
ENSMUSG00000118506	Cfap141	-0.265883	0.754329	7.42	6.86	7.28	4.92
ENSMUSG00000070427	Il18bp	-0.265608	0.667465	2.34	2.56	2.22	1.5
ENSMUSG00000025207	Sema4g	-0.26549	0.126892	7.04	6.84	6.37	5.35
ENSMUSG00000028466	Creb3	-0.265252	0.380725	7.16	6.8	6.08	5.74
ENSMUSG00000078440	Dohh	-0.265183	0.000234116	88.59	88.1	74.95	74.84
ENSMUSG00000045969	Ing1	-0.264924	0.00261068	44.04	39.97	35.27	35.64
ENSMUSG00000082585	Gm15387	-0.264683	0.208721	49.97	52.86	44.89	42.2
ENSMUSG00000097709	2810429I04Rik	-0.264629	0.551869	2.16	2.75	1.91	2.69
ENSMUSG00000031400	G6pdx	-0.264602	0.000541886	38.24	38.3	32.4	32.51
ENSMUSG00000003808	Farsa	-0.26417	0.00103259	65.21	69.44	55.1	59.11
ENSMUSG00000120913	ENSMUSG00000120913	-0.264108	0.755154	2.58	2.17	2.03	1.82
ENSMUSG00000073755	5730409E04Rik	-0.264039	0.695037	1.57	1.18	1.28	1.06
ENSMUSG00000022571	Pycrl	-0.263816	0.058085	32.42	34.12	27.74	28.7
ENSMUSG00000112478	Gm47761	-0.263725	0.476226	3.2	3.04	2.34	2.94
ENSMUSG00000034471	Caskin2	-0.263404	0.00614364	13.44	13.28	11.13	11.55
ENSMUSG00000087598	Zfp111	-0.263399	0.285925	3.72	3.9	2.98	3.4
ENSMUSG00000040459	Arglu1	-0.263234	0.00705375	20.49	20.27	17.17	17.44
ENSMUSG00000059674	Cdh24	-0.263216	0.343903	4.04	3.63	3.22	3.29
ENSMUSG00000018239	Zcchc10	-0.262876	0.103724	30.4	30.48	27.61	24.1
ENSMUSG00000078201	Tmem203	-0.262873	0.663995	7.02	6.97	5.37	6.47
ENSMUSG00000034163	Zfc3h1	-0.262685	0.00335553	10.72	10.42	9.16	8.8
ENSMUSG00000062070	Pgk1	-0.262532	1.80579e-14	534.52	552.56	464.06	459.12
ENSMUSG00000027998	Plrg1	-0.262172	0.00107826	56.17	56.65	49.32	46.55
ENSMUSG00000078872	Gm14401	-0.261966	0.543107	9.96	9.43	8.5	8.02
ENSMUSG00000027993	Trim2	-0.261651	0.136746	4.05	3.67	3.44	3.11
ENSMUSG00000052707	Tnrc6a	-0.261623	7.35187e-05	16.76	16.45	14.5	13.74
ENSMUSG00000025226	Fbxl15	-0.261578	0.620474	4.84	4.45	4.22	3.63
ENSMUSG00000026389	Steap3	-0.261245	0.357585	4.68	4.68	4.12	3.83
ENSMUSG00000060227	Golm2	-0.261081	0.044932	10.19	9.89	8.32	8.7
ENSMUSG00000015354	Pcolce2	-0.26074	0.0433702	9.16	9.44	7.8	8.01
ENSMUSG00000072258	Taf1a	-0.26058	0.213972	8.64	8.99	7.5	7.5
ENSMUSG00000067786	Nnat	-0.260523	0.451442	9.69	10.72	8.33	9.2
ENSMUSG00000037190	Cyb561d2	-0.260377	0.538504	7.5	6.8	6	6.25
ENSMUSG00000099370	Platr10	-0.260193	0.0144259	53.91	50.04	44.24	40.71
ENSMUSG00000040044	Orc3	-0.260047	0.0189199	24.84	26.44	22.21	21.45
ENSMUSG00000021699	Pde4d	-0.25994	0.268682	5.72	5.8	5.19	3.94
ENSMUSG00000003410	Elavl3	-0.259713	0.445081	2.17	2.14	1.74	1.92
ENSMUSG00000061374	Fiz1	-0.259457	0.00044945	43.7	44.12	37.91	37.02
ENSMUSG00000020974	Pole2	-0.259446	0.13821	17.17	17.53	14.41	15.1
ENSMUSG00000029404	Arl6ip4	-0.259436	0.0364156	46.8	45.51	38.58	39.95
ENSMUSG00000050213	Snip1	-0.25905	0.0712077	16.61	16.74	13.66	14.72
ENSMUSG00000041359	Tcl1	-0.259017	0.0177801	48.27	49.53	41.25	39.55
ENSMUSG00000002059	Rab34	-0.258761	0.0810228	26.87	27.62	22.7	23.69
ENSMUSG00000074832	Zfp998	-0.258746	0.412939	5.93	6.06	5.39	5.6
ENSMUSG00000032892	Rangrf	-0.258602	0.010642	112.83	113.69	93.54	98.97
ENSMUSG00000000958	Slc7a7	-0.258534	0.0400737	22.81	24.58	19.35	20.72
ENSMUSG00000030056	Isy1	-0.258461	0.0214315	8.64	8.48	7.25	7.33
ENSMUSG00000053198	Prx	-0.258143	0.0528816	8.58	8.17	7.19	7.05
ENSMUSG00000046185	Zfp84	-0.258139	0.26909	4.09	4.64	3.82	3.63
ENSMUSG00000041263	Rusc1	-0.258065	0.355219	6.49	6.29	5.68	5.16
ENSMUSG00000054128	H2-T3	-0.258006	0.735828	1.39	1.28	1.14	1.14
ENSMUSG00000041035	Dpcd	-0.257824	0.309989	14.94	17.02	12.22	14.98
ENSMUSG00000016386	Mpped2	-0.25777	0.63451	2.47	3.17	2.49	2.87
ENSMUSG00000022816	Fstl1	-0.257541	0.00641021	18.36	17.98	15.38	15.59
ENSMUSG00000040029	Ipo8	-0.257518	0.000270022	21.18	21.38	18.42	17.87
ENSMUSG00000019368	Sec14l4	-0.2575	0.209229	7.57	7.92	6.2	6.99
ENSMUSG00000037171	Nodal	-0.25748	0.00706	35.41	36.57	31.52	29.85
ENSMUSG00000024081	Cebpz	-0.257464	4.12919e-05	38.77	36.99	32.3	32.28
ENSMUSG00000032482	Cspg5	-0.256897	0.720361	1.17	1.5	1.36	1.08
ENSMUSG00000029703	Lrwd1	-0.256839	0.00293367	41.04	38.61	32.82	35.04
ENSMUSG00000058594	Fbh1	-0.256585	0.00852987	18.38	19.21	16.01	16.06
ENSMUSG00000041649	Klf8	-0.255998	0.0110632	13.37	13.74	11.6	11.6
ENSMUSG00000003352	Cacnb3	-0.255931	0.0532057	17.02	16.54	14.58	13.94
ENSMUSG00000048047	Zbtb33	-0.255856	0.483627	1.76	2.22	1.89	1.76
ENSMUSG00000037703	Lzts3	-0.255753	0.433495	3.01	2.43	2.35	2.31
ENSMUSG00000056413	Adap1	-0.255511	0.0119354	27.34	29.42	23.5	24.94
ENSMUSG00000031847	1700030J22Rik	-0.255436	0.589581	2.46	2.47	1.87	2.13
ENSMUSG00000053062	Jam2	-0.255404	5.82403e-08	66.84	67.43	62.92	60.73
ENSMUSG00000039830	Olig2	-0.255373	0.0952034	13.22	13.23	11.42	11.15
ENSMUSG00000028300	C9orf72	-0.255271	0.265454	5.52	5.68	4.95	4.72
ENSMUSG00000078954	Arhgap8	-0.255246	0.418355	8.69	8.36	7.46	7.12
ENSMUSG00000049532	Sall2	-0.25518	0.18928	4.66	4.72	4.13	3.88
ENSMUSG00000026755	Arpc5l	-0.254627	0.114212	26.64	28.45	24.37	22.69
ENSMUSG00000022223	Sdr39u1	-0.254523	0.46561	8.76	9.75	7.76	8.04
ENSMUSG00000033460	Armcx1	-0.254358	0.0676692	18.68	18.98	15.54	17.02
ENSMUSG00000024163	Mapk8ip3	-0.254252	0.0109265	11.22	11.59	9.9	9.62
ENSMUSG00000001569	Nom1	-0.254233	0.0202614	5.86	5.75	5.12	4.81
ENSMUSG00000036199	Ndufa13	-0.25423	0.0706143	36.91	37.81	30.78	32.99
ENSMUSG00000002897	Il17ra	-0.253562	0.480504	1.09	1.2	0.99	0.97
ENSMUSG00000024259	Slc25a46	-0.253541	0.0740037	8.3	8.35	7.31	6.94
ENSMUSG00000056342	Usp34	-0.253415	7.44509e-09	32.86	32.39	28.65	27.15
ENSMUSG00000005881	Ergic3	-0.253372	0.00151208	78.52	79.41	67.07	67.85
ENSMUSG00000043140	Tmem186	-0.253356	0.161711	7.49	8.13	6.81	6.55
ENSMUSG00000024844	Banf1	-0.253242	0.117611	331.57	340.45	267.75	307.45
ENSMUSG00000028885	Smpdl3b	-0.253157	0.190097	12.26	13.47	10.88	11.12
ENSMUSG00000040433	Zbtb38	-0.253086	0.0753622	4.72	4.82	4.23	3.98
ENSMUSG00000031388	Naa10	-0.253036	0.0297854	77.54	71	61.2	64.61
ENSMUSG00000111394	Gm49759	-0.253021	0.000238498	35.13	37.62	31.21	31.01
ENSMUSG00000046994	Mars2	-0.252983	0.139072	2.36	2.39	1.96	2.11
ENSMUSG00000001420	Tmem79	-0.252928	0.592873	3.14	3.01	2.37	2.94
ENSMUSG00000068391	Chrac1	-0.252771	0.328158	24.49	24.29	19.62	22.09
ENSMUSG00000069020	Urm1	-0.252604	0.052023	21.7	22.64	18.11	19.79
ENSMUSG00000001827	Folr1	-0.252546	0.0642032	46.37	44.25	36.63	38.4
ENSMUSG00000063704	Mapk15	-0.252324	0.760928	1.41	1.47	1.17	1.29
ENSMUSG00000062590	Armc9	-0.252111	0.284896	6.95	7.47	6.37	6.23
ENSMUSG00000026335	Pam	-0.251948	0.56406	1.77	1.88	1.63	1.48
ENSMUSG00000024268	Celf4	-0.2517	0.501412	2.32	2.82	2.23	2.13
ENSMUSG00000084796	Mir142hg	-0.251644	0.595857	5.68	5.37	4.23	5.2
ENSMUSG00000037279	Ovol2	-0.251602	0.631548	3.62	4.48	3.52	3.4
ENSMUSG00000036304	Zdhhc23	-0.251515	0.412939	1.97	2.27	1.93	1.83
ENSMUSG00000051721	Wdcp	-0.251386	0.329307	4.47	5.27	5.18	3.85
ENSMUSG00000068966	Zbtb34	-0.251384	0.0637793	5.74	5.75	4.88	4.96
ENSMUSG00000024201	Kdm4b	-0.251298	0.0243167	12.57	13.86	11.6	11.08
ENSMUSG00000018899	Irf1	-0.251076	0.0394055	23.17	22.96	19.59	19.91
ENSMUSG00000021728	Emb	-0.25095	0.00478054	27.37	28.61	24.27	23.69
ENSMUSG00000115219	Eef1akmt4	-0.250913	0.367242	14.69	14.01	12.46	12.11
ENSMUSG00000038521	C1s1	-0.250777	0.519789	2.86	2.94	2.64	2.35
ENSMUSG00000048039	Isg20l2	-0.250741	0.00173165	33.53	33.24	28.19	28.99
ENSMUSG00000116883	Gm49700	-0.250605	0.668792	3.24	3.34	2.66	2.95
ENSMUSG00000092029	Gm9027	-0.250572	0.715201	9.24	8.32	7.31	7.66
ENSMUSG00000028447	Dctn3	-0.250482	0.0473695	59.56	61.83	51.03	52.82
ENSMUSG00000022552	Sharpin	-0.250391	0.295367	10.86	11.21	8.94	9.94
ENSMUSG00000020333	Acsl6	-0.250241	0.615854	1.7	2.06	1.71	1.78
ENSMUSG00000070371	Prss36	-0.250014	0.607273	4.12	4.59	3.91	3.23
ENSMUSG00000038206	Fbxo8	-0.249861	0.348565	5.59	5.23	4.46	5.18
ENSMUSG00000067860	Zic3	-0.249858	0.00184725	23.9	24.1	21.17	20.57
ENSMUSG00000049305	Ccdc71	-0.249832	0.0227084	17.73	18.04	15.37	15.28
ENSMUSG00000053470	Kdm3a	-0.2498	3.96548e-06	46.14	44.59	39.64	38.12
ENSMUSG00000035069	Oma1	-0.249289	0.361387	7.86	9.27	7.62	7.08
ENSMUSG00000005846	Rsl1d1	-0.248839	2.74375e-06	117.62	119.34	102.78	100.4
ENSMUSG00000034768	Asb16	-0.248756	0.57938	2.42	2.6	1.99	2.32
ENSMUSG00000046179	E2f8	-0.248613	0.0479849	12.25	12.49	10.85	10.41
ENSMUSG00000038208	Pgap3	-0.248313	0.62098	2.36	2.74	2.03	2.32
ENSMUSG00000106262	Gm43375	-0.248268	0.7738	0.93	1.23	1.02	0.84
ENSMUSG00000019997	Ccn2	-0.247861	0.0659299	17.45	17.34	15.18	14.73
ENSMUSG00000030225	Dera	-0.247716	0.140963	20.86	23.17	20.23	17.61
ENSMUSG00000073155	1810058I24Rik	-0.247433	0.0989405	44.75	53.04	44.62	42.38
ENSMUSG00000028931	Kcnab2	-0.24699	0.664751	1.54	1.25	1.16	1.29
ENSMUSG00000027341	Tmem230	-0.246885	0.269672	13.61	12.28	10.76	11.63
ENSMUSG00000083534	H2-M6-ps	-0.246862	0.286445	22.38	21.34	18.54	18.95
ENSMUSG00000020075	Ddx21	-0.24684	8.80253e-12	120.83	120.86	103.79	103.77
ENSMUSG00000092622	Khdc3	-0.246407	0.514091	5.87	5.76	5.13	5.39
ENSMUSG00000099760	Gm28800	-0.245682	0.781319	1.08	1.35	1.23	0.86
ENSMUSG00000050854	Tmem125	-0.245034	0.74285	1.83	1.85	1.74	1.42
ENSMUSG00000038764	Ptpn3	-0.244911	0.12008	4.8	5.02	4.34	4.11
ENSMUSG00000003585	Sec14l2	-0.24479	0.584766	2.89	2.53	2.36	2.3
ENSMUSG00000032977	Fam207a	-0.244749	0.0754116	17.06	18.2	15.36	14.97
ENSMUSG00000002147	Stat6	-0.244745	0.0511605	12.35	11.98	10.76	10.16
ENSMUSG00000022199	Slc22a17	-0.244582	0.402128	6.46	7.12	5.15	6.51
ENSMUSG00000039656	Rxrb	-0.244579	0.0157266	27.29	26.44	23.51	22.5
ENSMUSG00000050335	Lgals3	-0.24455	0.698024	3.35	4	3.33	3.14
ENSMUSG00000008575	Nfib	-0.2444	0.188893	3.01	3.42	2.61	2.83
ENSMUSG00000033837	Foxh1	-0.244236	0.157087	25.54	26.05	20.93	23.39
ENSMUSG00000028532	Cachd1	-0.243989	0.156909	4.99	4.84	4.04	4.42
ENSMUSG00000029718	Pcolce	-0.243605	0.00627498	58.1	55.94	48.05	49.99
ENSMUSG00000026500	Cox20	-0.243386	0.711113	18.29	20.22	16.9	16.13
ENSMUSG00000002395	Use1	-0.24332	0.0844892	64.98	63.77	51	57.69
ENSMUSG00000066571	Garre1	-0.243203	0.0112825	14.35	13.45	13.02	11.36
ENSMUSG00000017721	Pigt	-0.243154	0.000286167	53.1	52.71	45.53	45.67
ENSMUSG00000030019	Fbxl14	-0.243151	0.0231329	20.15	20.63	17.18	17.91
ENSMUSG00000026641	Usf1	-0.243063	0.00359939	44.63	43.43	37.4	37.99
ENSMUSG00000038181	Chpf2	-0.242883	0.396176	2.98	3.08	2.56	2.45
ENSMUSG00000041353	Tmem29	-0.242879	0.649224	4.81	4.91	4.28	4.13
ENSMUSG00000049739	Zfp646	-0.242773	0.00594735	16.26	16.49	15	13.23
ENSMUSG00000022096	Hr	-0.242762	0.362804	2.73	2.49	2.28	2.21
ENSMUSG00000029127	Zbtb49	-0.242482	0.48412	3.79	3.33	3.13	3.03
ENSMUSG00000032590	Apeh	-0.242446	0.0236073	23.99	25.35	21.19	21.32
ENSMUSG00000022054	Nefm	-0.242021	0.67525	1.44	1.36	1.09	1.34
ENSMUSG00000042644	Itpr3	-0.2419	1.08678e-05	24.87	23.75	21.36	20.54
ENSMUSG00000001105	Ift20	-0.241411	0.185495	41.03	39.85	32.63	35.02
ENSMUSG00000039182	AW209491	-0.241368	0.356917	7.88	7.61	6.24	6.52
ENSMUSG00000038976	Ppp1r9b	-0.241321	0.00118047	28.81	26.92	24.97	23.54
ENSMUSG00000078864	Gm14322	-0.241253	0.715359	5.98	4.24	4.89	3.88
ENSMUSG00000086537	Gnasas1	-0.241251	0.716938	2.08	1.6	1.53	1.64
ENSMUSG00000050332	Amer1	-0.240887	0.172435	3.21	3.19	2.91	2.62
ENSMUSG00000003355	Fkbp11	-0.240781	0.417393	25.72	24.95	21.98	21.62
ENSMUSG00000024742	Fen1	-0.240764	0.000379987	61.05	60.6	52.52	52.48
ENSMUSG00000026553	Copa	-0.240714	1.60233e-06	57.35	56.36	50.05	48
ENSMUSG00000036875	Dna2	-0.24057	0.00650354	19.74	19.29	16.57	17.08
ENSMUSG00000004100	Ppan	-0.240558	7.34205e-05	110.19	107.46	94.66	92.97
ENSMUSG00000074238	Ap1ar	-0.240188	0.0274325	22.73	21.9	18.99	19.46
ENSMUSG00000091537	Tma7	-0.23983	0.0210191	94.71	102.14	82.5	87.36
ENSMUSG00000043065	Spice1	-0.239772	0.114524	7.52	8.47	6.88	6.93
ENSMUSG00000039367	Sec24c	-0.239463	8.98571e-06	51.95	49.96	44.62	43.1
ENSMUSG00000083718	Ccnb2-ps	-0.239369	0.728152	2.64	2.99	3.27	2.87
ENSMUSG00000021147	Wdr37	-0.23934	0.074484	9.16	9.39	7.96	8.12
ENSMUSG00000117499	Gm50010	-0.239122	0.706553	4.21	3.31	3.36	3.12
ENSMUSG00000033669	Zfp7	-0.239115	0.006853	36.2	38.7	31.56	33.18
ENSMUSG00000054792	Klhl18	-0.239066	0.500413	2.31	2.56	1.83	2.36
ENSMUSG00000004748	Mtfp1	-0.239028	0.142544	24.71	25.54	22	21.38
ENSMUSG00000027006	Dnajc10	-0.238937	0.00754777	19.21	19.88	17.05	16.71
ENSMUSG00000045382	Cxcr4	-0.238565	0.723418	2.25	2.22	1.88	1.97
ENSMUSG00000001767	Crnkl1	-0.238528	0.0169538	19.82	21.17	17.99	17.43
ENSMUSG00000068184	Ndufaf2	-0.238307	0.339204	38.03	39.76	32.49	34.65
ENSMUSG00000041974	Spidr	-0.238013	0.0794876	12.61	12.21	10.77	10.68
ENSMUSG00000002289	Angptl4	-0.237526	0.293837	6.1	7.01	6.06	5.29
ENSMUSG00000041130	Zfp598	-0.236842	9.1696e-05	49.11	48.98	42.9	42.02
ENSMUSG00000111291	Gm48604	-0.236639	0.673324	2.06	2.2	1.72	1.96
ENSMUSG00000022718	Dgcr8	-0.236578	0.00143184	25.86	25.44	21.85	22.51
ENSMUSG00000026620	Mark1	-0.236058	0.469735	2.63	2.49	2.28	2.15
ENSMUSG00000033039	Micall1	-0.236006	0.341101	2.28	2.37	2	2.04
ENSMUSG00000020420	Zfp607a	-0.235938	0.500413	2.91	2.73	2.52	2.35
ENSMUSG00000026634	Angel2	-0.235819	0.154827	8.28	8.8	7.11	7.7
ENSMUSG00000031358	Msl3	-0.235776	0.695673	1.89	2.07	1.72	1.7
ENSMUSG00000032370	Lactb	-0.235747	0.481744	5.89	5.96	4.65	5.44
ENSMUSG00000021840	Mapk1ip1l	-0.235631	2.01599e-06	54.39	55.18	47.79	47.05
ENSMUSG00000089862	Umad1	-0.235519	0.749253	1.86	2	1.99	1.42
ENSMUSG00000092417	Gpank1	-0.235055	0.275711	19.19	17.1	15.5	15.76
ENSMUSG00000020176	Grb10	-0.23485	0.501412	1.96	1.89	1.63	1.75
ENSMUSG00000067547	Gm7666	-0.234839	0.635995	11.01	10.78	8.41	10.39
ENSMUSG00000009092	Derl3	-0.234786	0.783134	2.38	2.12	1.97	1.93
ENSMUSG00000025209	Twnk	-0.234667	0.0297854	19.06	19.87	17.49	16.68
ENSMUSG00000033949	Trim36	-0.234642	0.646779	1.68	1.61	1.6	1.09
ENSMUSG00000025208	Mrpl43	-0.2344	0.102275	40.97	38.66	31.86	37
ENSMUSG00000026873	Phf19	-0.234351	0.347927	4.47	4.48	4.11	3.64
ENSMUSG00000047213	Ythdf3	-0.234339	0.00215187	24.12	22.38	20.6	19.83
ENSMUSG00000031548	Sfrp1	-0.234331	1.81395e-05	49.63	47.64	42.13	42.11
ENSMUSG00000019894	Slc6a15	-0.234137	0.365454	4.42	4.47	4.05	3.65
ENSMUSG00000029699	Ssc4d	-0.234046	0.396638	9.96	9.58	9.13	8.59
ENSMUSG00000040720	Virma	-0.233724	0.0030172	15.15	15.23	13.47	13.13
ENSMUSG00000121500	ENSMUSG00000121500	-0.233468	0.289028	9.01	8.74	7.89	7.72
ENSMUSG00000040640	Erc2	-0.233378	0.577142	1.52	1.87	1.31	1.26
ENSMUSG00000002393	Nr2f6	-0.233337	0.175715	14.34	15.11	12.13	13.39
ENSMUSG00000087166	L1td1	-0.233014	1.27953e-09	188.8	190.09	166	161.93
ENSMUSG00000030610	Det1	-0.2328	0.54436	4.15	5.36	4.01	4.2
ENSMUSG00000021130	Galnt16	-0.232671	0.695714	1.18	1.11	1.03	0.93
ENSMUSG00000001158	Snrnp27	-0.232649	0.245902	34.34	35.32	29.86	30.47
ENSMUSG00000042148	Cox10	-0.232329	0.108512	13.22	13.47	11.98	11.18
ENSMUSG00000053559	Smagp	-0.232306	0.42537	16.66	17.09	15.1	14.45
ENSMUSG00000040365	Trim41	-0.232153	0.00155503	33.43	34.01	28.9	29.6
ENSMUSG00000028519	Dab1	-0.232024	0.665945	1.84	1.48	2.15	1.69
ENSMUSG00000061731	Ext1	-0.231948	0.163311	4.65	4.94	4.54	3.79
ENSMUSG00000055633	Zfp580	-0.231885	0.670316	5.61	6.21	5.42	4.85
ENSMUSG00000045095	Magi1	-0.231792	0.0141762	11.6	11.28	9.61	10.01
ENSMUSG00000027628	Aar2	-0.231751	0.0733611	13.86	13.9	12.87	11.83
ENSMUSG00000038538	Ubn2	-0.231627	0.00888274	6.13	6.22	5.47	4.96
ENSMUSG00000003458	Ncstn	-0.231618	0.0350352	20.45	21.87	18.31	18.42
ENSMUSG00000032002	Dcun1d5	-0.231584	0.0939432	24.57	23.69	19.99	21.51
ENSMUSG00000084762	Platr3	-0.231568	0.666791	28.52	26.45	24.82	23.79
ENSMUSG00000042831	Alkbh6	-0.23155	0.371143	20.24	21.2	17.64	18.29
ENSMUSG00000022635	Zcrb1	-0.231547	0.440286	20.65	20.4	16.6	18.87
ENSMUSG00000038489	Polr2l	-0.231157	0.0936964	28.21	26.85	23.73	24.03
ENSMUSG00000045822	Zswim3	-0.230873	0.219426	9.53	9.44	8.33	8.14
ENSMUSG00000053654	Krt42	-0.230739	0.00412356	69.77	71.54	61.85	60.82
ENSMUSG00000000416	Cttnbp2	-0.230735	0.582976	1.43	1.43	1.23	1.25
ENSMUSG00000024854	Pold4	-0.23073	0.756559	5.03	4.94	4.68	3.86
ENSMUSG00000019362	D8Ertd738e	-0.230622	0.0934229	122.28	125.73	103.26	111.34
ENSMUSG00000032092	Mpzl2	-0.230589	0.0210191	21.67	22.4	19.18	19.08
ENSMUSG00000047904	Sstr2	-0.230566	0.751002	1.67	1.92	1.56	1.36
ENSMUSG00000005483	Dnajb1	-0.230342	0.0333958	20.28	19.91	17.83	17.06
ENSMUSG00000068079	Tcf15	-0.230158	0.301374	25.6	25.5	22.49	21.86
ENSMUSG00000008429	Herpud2	-0.230152	0.364877	6.22	5.86	5.05	5.43
ENSMUSG00000020549	Elac2	-0.230112	0.000778214	47.91	50.24	42.83	42.54
ENSMUSG00000020519	Sap30l	-0.230075	0.316485	24.96	21.97	18.8	21.86
ENSMUSG00000041329	Atp1b2	-0.229928	0.334304	6.25	7.11	5.91	5.7
ENSMUSG00000037085	Trmt12	-0.229901	0.623497	1.55	1.69	1.2	1.61
ENSMUSG00000018293	Pfn1	-0.229835	1.19267e-09	1312.25	1310.49	1118.44	1158.16
ENSMUSG00000062931	Zfp938	-0.229741	0.669692	2.61	2.98	2.4	2.46
ENSMUSG00000000295	Hddc2	-0.229654	0.446712	20.05	24.18	18.73	19.66
ENSMUSG00000032867	Fbxw8	-0.229555	0.0154188	13.99	14.22	12.35	12.16
ENSMUSG00000073158	9030624G23Rik	-0.229475	0.747771	1.9	1.67	1.27	1.81
ENSMUSG00000003623	Crot	-0.229381	0.12008	12.96	13.24	10.89	11.88
ENSMUSG00000032316	Clk3	-0.229216	0.13102	15.47	15.76	13.07	14.02
ENSMUSG00000047090	Tmem198b	-0.228894	0.444629	5.81	5.6	4.78	5.11
ENSMUSG00000022369	Mtbp	-0.228671	0.115182	12.13	12.02	10.25	10.63
ENSMUSG00000066306	Numa1	-0.228638	6.70546e-06	35.48	34.45	30.91	29.92
ENSMUSG00000045377	Tmem88	-0.228609	0.562014	5.79	6.31	5.32	5.2
ENSMUSG00000098176	Ccdc166	-0.228562	0.740622	1.56	1.35	1.27	1.29
ENSMUSG00000085860	2410003L11Rik	-0.228496	0.271558	16.9	19.68	14.74	16.15
ENSMUSG00000033256	Shf	-0.22847	0.285202	19.83	20.94	18.68	17.92
ENSMUSG00000020107	Anapc16	-0.22846	0.223464	23.37	20.89	19.59	17.31
ENSMUSG00000027582	Zgpat	-0.228239	0.163311	18.63	17.57	16.83	14.68
ENSMUSG00000030199	Etv6	-0.228198	0.0355745	10.23	10.63	9.22	8.88
ENSMUSG00000036513	Commd2	-0.227807	0.245482	9.74	9.8	7.69	9.29
ENSMUSG00000032586	Traip	-0.227732	0.195581	10.47	11.03	9.29	9.42
ENSMUSG00000111080	Gm20300	-0.227693	0.714589	1.39	1.17	1.06	1.17
ENSMUSG00000060279	Ap2a1	-0.227492	6.48215e-06	74.38	73.32	64.47	63.79
ENSMUSG00000023987	Pgc	-0.226976	0.64546	5.37	5.48	4.19	5.23
ENSMUSG00000024982	Zdhhc6	-0.226863	0.100472	19.38	19.11	16.62	16.86
ENSMUSG00000039834	Zfp335	-0.226674	0.108451	9.58	9.72	8.97	7.85
ENSMUSG00000022760	Thap7	-0.22662	0.557725	10.14	9.9	7.83	9.45
ENSMUSG00000051257	Trap1a	-0.226453	0.00577585	110.03	106.9	91.58	97.09
ENSMUSG00000025169	Ogfod3	-0.226419	0.579364	8.15	9.82	6.77	8.85
ENSMUSG00000032578	Cish	-0.226359	0.667125	2	1.99	1.78	1.69
ENSMUSG00000026864	Hspa5	-0.226208	4.80146e-10	209.36	207.63	182.6	181.93
ENSMUSG00000054708	Ankrd24	-0.226101	0.413152	3.98	4.49	3.85	3.53
ENSMUSG00000029613	Eif2ak1	-0.226059	0.0081666	19.84	20.01	17.16	17.55
ENSMUSG00000029725	Ppp1r35	-0.226049	0.306922	30	27.66	24.02	26.08
ENSMUSG00000019143	Hars2	-0.225797	0.244753	10.69	9.81	8.77	8.21
ENSMUSG00000024835	Coro1b	-0.22545	0.00117252	73.94	74.3	63.83	65.31
ENSMUSG00000027291	Vps39	-0.22542	0.0729736	10.82	10.82	9.69	9.18
ENSMUSG00000024955	Esrra	-0.225282	0.264196	12.7	11.5	9.9	11.16
ENSMUSG00000061755	Bod1l	-0.22525	0.00262577	13.05	12.86	11.87	10.75
ENSMUSG00000033031	Cip2a	-0.225216	0.00333932	28.69	30.17	25.12	26.19
ENSMUSG00000022911	Arl13b	-0.225161	0.317874	5.54	5.59	4.65	5.05
ENSMUSG00000005397	Nid1	-0.224618	6.17131e-06	43.57	42.91	38.41	37.02
ENSMUSG00000034201	Gas2l1	-0.224597	0.0697544	18.85	20	16.82	17.25
ENSMUSG00000078497	Zfp978	-0.224434	0.215571	25.65	27.95	23.72	23.02
ENSMUSG00000066456	Hmgn3	-0.224375	0.802547	3.21	3.11	3.01	2.4
ENSMUSG00000037296	Lsm1	-0.224251	0.305123	7.7	8.39	6.88	7.16
ENSMUSG00000041859	Mcm3	-0.2239	2.4818e-09	184.45	183.03	161.78	158.84
ENSMUSG00000018848	Rars	-0.223887	3.58307e-05	108.64	107.77	95.83	92.96
ENSMUSG00000079260	Tmppe	-0.223832	0.237825	8.78	8.88	7.51	7.89
ENSMUSG00000028843	Sh3bgrl3	-0.223795	0.0894139	102.99	110.53	88.44	97.41
ENSMUSG00000024056	Ndc80	-0.223634	0.1005	21.97	20.99	18.02	19.44
ENSMUSG00000007589	Tinf2	-0.223601	0.0417348	22.76	23.46	19.4	20.41
ENSMUSG00000078656	Vps25	-0.22346	0.0149141	99.86	105.46	86.67	89.96
ENSMUSG00000003423	Pih1d1	-0.223199	0.108224	46.18	48	40.38	41.28
ENSMUSG00000020520	Galnt10	-0.223048	0.0784428	12.73	12.65	11.16	10.46
ENSMUSG00000024480	Ap3s1	-0.222873	0.199913	21.57	22.44	19.06	19.63
ENSMUSG00000044221	Grsf1	-0.222829	0.000266409	69.52	67.87	59.74	59.97
ENSMUSG00000068240	Gm11808	-0.222746	6.39188e-06	1371.27	1368.98	1246.16	1139.17
ENSMUSG00000074211	Sdhaf1	-0.222669	0.472853	4.91	5.34	4.42	4.54
ENSMUSG00000051853	Arf3	-0.222603	0.00022699	37.07	36.83	32.81	31.74
ENSMUSG00000024556	Me2	-0.222174	0.0105647	33.39	32.93	28.9	29.02
ENSMUSG00000039055	Eme1	-0.221801	0.0226141	32.53	30.83	28.13	27.22
ENSMUSG00000068323	Slc4a5	-0.221792	0.0586448	10.21	9.9	8.87	8.7
ENSMUSG00000040350	Trim7	-0.22167	0.640529	3.61	2.88	2.97	2.68
ENSMUSG00000030083	Abtb1	-0.221634	0.130718	23.19	24.21	19.87	21.52
ENSMUSG00000017664	Slc35c2	-0.221313	0.272334	12.6	13.97	11.33	11.86
ENSMUSG00000023723	Mrps23	-0.2212	0.0559273	101.31	73.17	53.68	68.67
ENSMUSG00000024459	H2-M5	-0.221154	0.263427	24.46	24.38	21.41	21.25
ENSMUSG00000091955	Gm9844	-0.221118	0.68185	27.26	24.08	23.35	21.31
ENSMUSG00000018727	Cpsf4l	-0.221048	0.303647	19.51	18.57	16.71	16.4
ENSMUSG00000051184	Zfp524	-0.221004	0.799171	3.02	2.47	2.53	2.21
ENSMUSG00000063480	Snu13	-0.220867	0.000674053	92.45	94.75	79.02	84.56
ENSMUSG00000092118	Fancf	-0.220584	0.666791	3.93	3.71	3.21	3.46
ENSMUSG00000067370	B3galt4	-0.220527	0.710628	3.1	3.68	2.85	3.08
ENSMUSG00000041429	Nthl1	-0.220438	0.440548	15.82	15.95	14.25	13.51
ENSMUSG00000027242	Wdr76	-0.220423	0.0708415	15.1	16.13	14.6	13.04
ENSMUSG00000022338	Eny2	-0.219978	0.23636	47.84	43.81	40.08	39.82
ENSMUSG00000032497	Lrrfip2	-0.219894	0.238309	17.92	15.59	15.38	13.33
ENSMUSG00000005681	Apoa2	-0.219702	0.55617	45.61	44.84	39.05	39.38
ENSMUSG00000075592	Nynrin	-0.219613	1.53271e-05	31.68	31.14	27.34	27.63
ENSMUSG00000087547	Platr27	-0.219543	0.725515	12.17	10.68	9.74	10.17
ENSMUSG00000030031	Kbtbd8	-0.219238	0.10895	9.01	8.42	7.63	7.59
ENSMUSG00000021413	Prpf4b	-0.219147	0.00125849	17.71	16.95	15.35	14.99
ENSMUSG00000029265	Dr1	-0.219122	0.0559918	20.52	19.27	18.05	16.79
ENSMUSG00000029121	Crmp1	-0.21903	0.119722	14.33	13.97	12.71	12.07
ENSMUSG00000073448	Gm10509	-0.218838	0.739587	1.13	1.03	0.99	0.89
ENSMUSG00000053604	Rpia	-0.218802	0.552779	5.86	5.68	4.82	5.27
ENSMUSG00000025544	Tm9sf2	-0.21859	0.00418293	36.76	36.49	31.42	32.7
ENSMUSG00000045667	Smtnl2	-0.218057	0.00391987	41.14	40.85	36.4	35.41
ENSMUSG00000040843	Tiprl	-0.217987	0.108226	9.58	9.67	8.25	8.62
ENSMUSG00000030805	Stx4a	-0.217973	0.214091	23.64	25.72	21.54	21.18
ENSMUSG00000030051	Aplf	-0.217833	0.448653	6.33	6.78	5.78	5.79
ENSMUSG00000048970	C1galt1c1	-0.217781	0.731991	3.09	3.94	2.99	3.16
ENSMUSG00000001517	Foxm1	-0.21777	0.0118136	18.86	19.23	17.29	16.95
ENSMUSG00000001576	Ergic1	-0.217551	0.00176166	54.35	59.1	50.96	47.85
ENSMUSG00000058444	Map2k5	-0.217465	0.461848	6.01	6.47	5.79	5.16
ENSMUSG00000031438	Rnf128	-0.217437	0.656375	2.64	2.21	2.16	2.09
ENSMUSG00000004846	Plod3	-0.217349	0.0399646	19.12	19.72	17.23	16.83
ENSMUSG00000014504	Srp19	-0.217265	0.174793	66.16	75.61	58	65.79
ENSMUSG00000069539	Scyl2	-0.217258	0.0873187	11.06	10.65	9.33	9.95
ENSMUSG00000037752	Xkr8	-0.21707	0.343751	4.69	4.69	3.86	4.36
ENSMUSG00000038155	Gstp2	-0.217049	0.0458292	122.03	126.12	104.24	112.87
ENSMUSG00000021306	Gpr137b	-0.216872	0.447102	4.93	4.3	4.2	3.95
ENSMUSG00000021786	Oxsm	-0.216808	0.764984	1.35	1.19	1.38	0.97
ENSMUSG00000028797	Tmem234	-0.216778	0.0754116	50.54	44.65	41.22	41.82
ENSMUSG00000006360	Crip1	-0.216639	0.53328	64.28	65.95	53.09	60.54
ENSMUSG00000025616	Usp16	-0.216511	0.154948	11.85	11.62	10.46	9.84
ENSMUSG00000030695	Aldoa	-0.216358	2.22422e-10	1212.47	1272.02	1096.92	1081.24
ENSMUSG00000029708	Gcc1	-0.21635	0.294045	5.16	5	4.18	4.73
ENSMUSG00000031805	Jak3	-0.216237	0.0163036	21.5	20.98	18.89	18.25
ENSMUSG00000030029	Lrig1	-0.216092	0.140452	7.66	7.47	6.81	6.49
ENSMUSG00000026849	Tor1a	-0.216085	0.239657	22	23.83	19.85	20.34
ENSMUSG00000001472	Tcf25	-0.215897	8.80114e-05	73.48	72.79	61.73	62.4
ENSMUSG00000055799	Tcf7l1	-0.215888	0.00306828	49.4	47.41	42.49	40.61
ENSMUSG00000107068	Gm42742	-0.215641	0.389178	25.09	20.7	17.33	22.77
ENSMUSG00000063889	Crem	-0.215627	0.620497	5.64	5.26	4.27	4.82
ENSMUSG00000028618	Tmem59	-0.215481	0.0486815	37.26	38.34	32.79	33.64
ENSMUSG00000090963	Gm17655	-0.215433	0.820167	1.58	1.71	1.23	4.75
ENSMUSG00000037902	Sirpa	-0.215408	0.498333	4.09	3.69	3.56	3.08
ENSMUSG00000036160	Surf6	-0.215204	0.0183334	27.98	29.51	25.46	25.02
ENSMUSG00000026014	Raph1	-0.215152	0.00665059	12.53	12.72	11.04	10.97
ENSMUSG00000030298	Sec13	-0.214787	0.00715272	89.23	92.41	78.73	80.64
ENSMUSG00000028419	Chmp5	-0.214745	0.0939432	36.98	34.97	32.13	31
ENSMUSG00000045867	Cradd	-0.214679	0.606788	6.45	6.97	5.62	6.65
ENSMUSG00000039419	Cntnap2	-0.214645	0.501924	5.88	6.03	5.38	4.93
ENSMUSG00000107167	B3galt9	-0.214527	0.78229	1.87	2.34	1.91	1.79
ENSMUSG00000031004	Mki67	-0.214475	4.68489e-05	29.67	28.28	26.15	24.76
ENSMUSG00000030924	Rexo5	-0.214267	0.753338	1.91	1.82	1.59	1.62
ENSMUSG00000031505	Naxd	-0.214202	0.320516	18.96	18.5	16.74	16.25
ENSMUSG00000038268	Ovca2	-0.21414	0.157611	14.83	13.96	12.87	12.41
ENSMUSG00000020284	Cfap410	-0.214019	0.645819	4.06	4.17	3.46	3.76
ENSMUSG00000029594	Rbm19	-0.21397	0.0215216	19.06	19.48	17.16	16.7
ENSMUSG00000024036	Slc37a1	-0.213912	0.217956	9.9	9.47	8.44	8.52
ENSMUSG00000028862	Map3k6	-0.213844	0.638006	1.64	1.58	1.48	1.35
ENSMUSG00000095362	Gm14325	-0.213778	0.462305	28.4	26.4	18.41	25.5
ENSMUSG00000021024	Psma6	-0.213561	0.00108057	228.63	235.69	197.02	210.43
ENSMUSG00000028047	Thbs3	-0.213459	0.634538	2.87	2.73	2.91	2.02
ENSMUSG00000070697	Utp3	-0.213443	0.0243167	57.62	59.17	49.39	53.17
ENSMUSG00000005069	Pex5	-0.213315	0.00797959	33.46	35.3	30.25	30.2
ENSMUSG00000027834	Serpini1	-0.213252	0.609799	1.92	1.97	1.8	1.63
ENSMUSG00000021025	Nfkbia	-0.213138	0.107796	34.74	33.27	28.82	30.89
ENSMUSG00000121230	ENSMUSG00000121230	-0.213089	0.781593	1.37	2.12	1.5	1.57
ENSMUSG00000102869	Norad	-0.212978	0.00190213	26.18	26.09	22.84	23.11
ENSMUSG00000030870	Ubfd1	-0.212884	0.000862368	35.04	36.39	32.26	30.57
ENSMUSG00000033871	Ppargc1b	-0.212864	0.645219	1.94	1.82	1.67	1.64
ENSMUSG00000040824	Snrpd2	-0.212723	0.00174948	149.17	155.16	128.51	138.84
ENSMUSG00000016200	Syt14	-0.212615	0.288928	3.07	2.7	2.57	2.55
ENSMUSG00000076431	Sox4	-0.21259	0.308938	4.53	4.61	3.89	4.15
ENSMUSG00000048070	Pirt	-0.212336	0.659641	1.55	1.49	1.39	1.28
ENSMUSG00000112449	Srp54b	-0.212096	0.0902469	18.06	16.75	14.34	16.26
ENSMUSG00000043866	Taf10	-0.21202	0.0478849	15.59	14.69	13.1	13.53
ENSMUSG00000018381	Abi3	-0.211694	0.638967	1.89	1.7	1.56	1.6
ENSMUSG00000021537	Cetn3	-0.211482	0.122158	42.63	46.34	38.88	39.37
ENSMUSG00000032946	Rasgrp2	-0.211336	0.149439	70.73	66.7	63.31	59.31
ENSMUSG00000121151	ENSMUSG00000121151	-0.211103	0.832122	1.22	1.47	0.91	1.45
ENSMUSG00000020308	Tpgs1	-0.211055	0.302028	29.4	27.98	23.36	26.7
ENSMUSG00000021868	Ppif	-0.210936	0.11546	34.29	38.34	32.35	31.6
ENSMUSG00000048502	Duxbl1	-0.210725	0.346944	9.15	9.66	8.37	8.19
ENSMUSG00000039748	Exo1	-0.210719	0.0102973	11.85	11.99	10.66	10.34
ENSMUSG00000022051	Bnip3l	-0.210669	0.0259633	23.46	23.54	20.86	20.53
ENSMUSG00000073079	Srp54a	-0.210625	0.0372159	29.92	29.79	23.8	24.96
ENSMUSG00000050447	Lypd6	-0.210586	0.684871	1.59	1.77	1.53	1.43
ENSMUSG00000030559	Rab38	-0.21057	0.79438	2.18	2.17	2.24	1.59
ENSMUSG00000006494	Pdk1	-0.210509	0.0197062	16.79	16.63	15.25	14.19
ENSMUSG00000075511	1700001L05Rik	-0.210438	0.217771	9.85	11.43	9.71	8.57
ENSMUSG00000031157	Pqbp1	-0.210215	0.15594	43.19	47.5	40.3	39.57
ENSMUSG00000025732	Mcrip2	-0.210177	0.687509	9.87	9.78	7.99	9.08
ENSMUSG00000008734	Gprc5b	-0.210011	0.420046	3.45	3.61	3.23	3
ENSMUSG00000030409	Dmpk	-0.209939	0.782257	1.16	1.33	1.09	1.15
ENSMUSG00000026021	Sumo1	-0.209839	0.00371909	126.9	126.53	109.49	113.54
ENSMUSG00000022401	Xpnpep3	-0.209703	0.185654	7.22	6.45	6.41	5.6
ENSMUSG00000021871	Gm49342	-0.209514	0.405159	37.21	40.22	37.47	30.76
ENSMUSG00000053838	Nudcd3	-0.209427	0.00191216	39.91	38.84	35.76	33.66
ENSMUSG00000005823	Gpr108	-0.209384	0.360308	9.84	9.17	8.59	8.17
ENSMUSG00000067147	Rpl7a-ps11	-0.209177	0.986464	0	30.55	14.19	12.7
ENSMUSG00000067261	Foxd3	-0.20908	0.156764	19.13	17.88	15.79	16.8
ENSMUSG00000021951	Eef1akmt1	-0.209018	0.450911	24.65	28.42	22.6	24.29
ENSMUSG00000043439	Epop	-0.208636	1.10713e-05	263.72	259.5	221.88	239.26
ENSMUSG00000032459	Mrps22	-0.208526	0.285836	26.86	27.25	22.47	25.17
ENSMUSG00000045752	Tssc4	-0.20848	0.294013	22.82	20.49	17.82	18.83
ENSMUSG00000021276	Cinp	-0.208336	0.174315	46.33	45.49	40.11	44.37
ENSMUSG00000024914	Drap1	-0.208304	0.0231888	123.14	125.7	110.36	103.6
ENSMUSG00000062937	Mtap	-0.208171	0.00902466	38.49	37.47	33.93	33.07
ENSMUSG00000032221	Mns1	-0.208137	0.177843	7.31	7.18	6.75	6.03
ENSMUSG00000038762	Abcf1	-0.208018	5.90272e-06	107.25	104.6	94.15	92.72
ENSMUSG00000064267	Hvcn1	-0.207921	0.234379	11.31	10.92	10.14	9.45
ENSMUSG00000029066	Mrpl20	-0.207871	0.248543	61.86	65.82	52.43	59.65
ENSMUSG00000020211	Sf3a2	-0.207765	0.011059	73.23	65.53	57.61	62.87
ENSMUSG00000052293	Taf9	-0.207564	0.678234	5.81	5.38	4.48	5.51
ENSMUSG00000029122	Evc	-0.207373	0.243534	6.65	6.8	5.98	6.02
ENSMUSG00000032312	Csk	-0.207063	0.173825	18.42	17.02	16.72	15.09
ENSMUSG00000040370	Etfrf1	-0.207001	0.708119	4.1	4.53	3.37	4.18
ENSMUSG00000035781	R3hdm4	-0.206976	0.201261	21.16	19.77	18.83	17.3
ENSMUSG00000026657	Frmd4a	-0.206666	0.0967488	8.39	8.48	7.2	7.49
ENSMUSG00000039200	Atf7ip2	-0.206211	0.602723	3.65	3.58	3.5	3.61
ENSMUSG00000051671	Coa6	-0.206188	0.615252	17.78	19.58	15	18.42
ENSMUSG00000031146	Plp2	-0.206122	0.00604523	168.46	183.55	150.85	159.83
ENSMUSG00000029911	Ssbp1	-0.206051	0.151837	58.01	65.31	51.32	56.36
ENSMUSG00000033126	Ybey	-0.205973	0.649251	1.52	1.61	1.41	1.35
ENSMUSG00000023791	Pigx	-0.205924	0.380457	28.27	27.9	22.85	25.97
ENSMUSG00000035329	Fbxo33	-0.205904	0.242895	8.94	8.2	7.28	7.85
ENSMUSG00000035372	1810055G02Rik	-0.205842	0.202828	22.22	22.47	20.97	17.9
ENSMUSG00000002129	Sf3a1	-0.205772	4.06118e-06	76.04	73.69	66.84	65.46
ENSMUSG00000015289	Lage3	-0.205744	0.251227	59.02	59.97	49.61	55.42
ENSMUSG00000026254	Eif4e2	-0.205613	0.000487923	156.38	165.39	141.02	141.28
ENSMUSG00000071669	Snx29	-0.205576	0.628907	3.92	3.66	3.87	2.67
ENSMUSG00000001123	Lgals9	-0.205566	0.710236	4.02	4.04	3.28	3.85
ENSMUSG00000020792	Exoc7	-0.205302	0.110386	14.77	15.05	13.07	13.32
ENSMUSG00000097929	Tunar	-0.205251	0.762082	1.1	1.43	1.02	1.22
ENSMUSG00000038604	Ripor1	-0.205218	0.224188	9.36	8.9	8.72	7.44
ENSMUSG00000001175	Calm1	-0.20492	0.000425802	61.74	64.04	53.77	57.42
ENSMUSG00000030603	Psmc4	-0.204754	0.000247994	183.32	190.04	162.65	167.19
ENSMUSG00000039774	Galnt12	-0.204687	0.720517	2.42	2.31	1.96	2.23
ENSMUSG00000020926	Adam11	-0.204615	0.688444	1.35	1.08	1.08	1.06
ENSMUSG00000047036	Zfp445	-0.204577	0.0130016	17.52	18.73	15.76	16.58
ENSMUSG00000030980	Knop1	-0.204297	0.000644124	36.46	35.4	35.28	34.93
ENSMUSG00000029475	Kdm2b	-0.204258	0.000841648	44.63	45.04	40.03	39.03
ENSMUSG00000042572	Ube2q1	-0.204236	0.00425638	49.08	49.78	44.98	41.31
ENSMUSG00000029910	Mad2l1	-0.203886	0.00914921	48.61	50.43	44.56	42.93
ENSMUSG00000024976	Shoc2	-0.203791	0.109329	12.18	12.27	10.69	10.73
ENSMUSG00000050234	Gja4	-0.20358	0.74573	2.92	2.84	2.41	2.67
ENSMUSG00000040128	Pnrc1	-0.203554	0.136496	34.3	33.84	28.39	31.82
ENSMUSG00000042548	Asxl1	-0.203485	0.000117546	32.58	31.96	28.8	28.31
ENSMUSG00000050144	Slc25a44	-0.203469	0.230224	9.09	9.01	7.78	8.26
ENSMUSG00000071302	2610044O15Rik8	-0.203403	0.539587	6.76	6.43	6.13	5.22
ENSMUSG00000024642	Tle4	-0.203374	0.00159044	32.87	32.77	29.2	28.9
ENSMUSG00000079109	Pms2	-0.203205	0.237306	6.39	7.27	6.32	5.62
ENSMUSG00000041417	Pik3r1	-0.203124	0.34684	3.43	2.95	2.86	2.79
ENSMUSG00000063605	Ccdc102a	-0.203119	0.681445	3.55	3.8	2.61	3.89
ENSMUSG00000063052	Lrrc40	-0.2031	0.0630616	15.01	15.34	13.77	13.11
ENSMUSG00000014837	4931428F04Rik	-0.203095	0.511547	3.95	4.01	3.87	3.38
ENSMUSG00000006345	Ggt1	-0.203087	0.584766	5.02	4.69	4.35	4.23
ENSMUSG00000009739	Pou6f1	-0.203054	0.685386	1.27	1.59	1.24	1.25
ENSMUSG00000098950	Gm28036	-0.203037	0.568454	2.27	2.41	2.39	1.75
ENSMUSG00000020646	Mboat2	-0.202852	0.333327	6.84	7.84	7.06	6.63
ENSMUSG00000078630	Tomt	-0.202797	0.74573	1.54	1.91	1.67	1.39
ENSMUSG00000050212	Eva1b	-0.202666	0.53027	12.27	12.4	11.96	9.67
ENSMUSG00000036966	Spryd3	-0.202478	0.402253	8.13	8.58	7.92	6.89
ENSMUSG00000026775	Yme1l1	-0.202427	0.000691282	37.27	37.03	33.19	32.62
ENSMUSG00000022142	Nup155	-0.202382	9.15354e-05	39.7	39.3	35.61	34.2
ENSMUSG00000039963	Ccdc40	-0.202373	0.613914	1.88	1.72	1.59	1.59
ENSMUSG00000072419	Dppa2	-0.202249	0.0197587	47.64	47.97	42.55	41.76
ENSMUSG00000059734	Ndufs8	-0.202221	0.104422	91.79	89.84	81.37	80.03
ENSMUSG00000003348	Mob3a	-0.201976	0.283849	10.37	11.05	9.16	9.81
ENSMUSG00000059423	Zfp933	-0.201804	0.634462	1.86	1.84	1.62	1.66
ENSMUSG00000019467	Arhgef25	-0.201604	0.0784775	25.28	26.23	22.47	22.81
ENSMUSG00000024194	Cuta	-0.201582	0.436528	45.71	48.3	36.54	45.29
ENSMUSG00000020527	Myo19	-0.201102	0.0734637	15.9	16.96	15.26	14.42
ENSMUSG00000014547	Wdfy2	-0.200917	0.17562	6.41	5.82	5.32	5.51
ENSMUSG00000089824	Rbm12	-0.200877	0.0160298	13.83	14.06	12.28	12.46
ENSMUSG00000078713	Tomm5	-0.200711	0.173825	131.53	151.91	119.11	130.56
ENSMUSG00000024293	Esco1	-0.200669	0.182723	9.55	9.92	9.14	9.24
ENSMUSG00000028654	Mycl	-0.200591	0.24989	9.66	9.03	8.43	8.11
ENSMUSG00000063406	Tmed5	-0.200588	0.256961	14.81	17.65	11.67	12.46
ENSMUSG00000062232	Rapgef2	-0.200556	0.149878	7.03	6.96	6.64	5.84
ENSMUSG00000047466	8030462N17Rik	-0.200506	0.0342417	18.13	18.85	16.06	16.95
ENSMUSG00000029547	Ints1	-0.200247	0.00072776	36.34	34.35	32.35	30.24
ENSMUSG00000020185	E2f7	-0.199892	0.252396	6.81	5.86	5.68	6.26
ENSMUSG00000054871	Tmem158	-0.199775	0.813436	2.12	1.6	1.57	1.73
ENSMUSG00000018470	Kcnab3	-0.199762	0.671658	2.7	2.9	2.58	2.39
ENSMUSG00000002768	Mea1	-0.199622	0.173825	65.47	65.49	55.87	59.64
ENSMUSG00000089726	Mir17hg	-0.199381	0.389783	5.74	5.49	5.12	4.84
ENSMUSG00000025340	Rabgef1	-0.199284	0.266288	12.28	12.37	11.69	10.17
ENSMUSG00000062619	2310039H08Rik	-0.199125	0.753338	9.35	7.93	7.3	7.98
ENSMUSG00000058298	Mcm9	-0.199116	0.317785	6.24	5.73	4.97	5.42
ENSMUSG00000033386	Frrs1	-0.199025	0.0216007	22.93	24.07	21.41	20.07
ENSMUSG00000019984	Med23	-0.198818	0.0247464	19.09	18.47	17.04	16.22
ENSMUSG00000028487	Bnc2	-0.198718	0.388251	5.05	5.05	4.63	4.31
ENSMUSG00000096795	Zfp433	-0.198683	0.767362	3.06	2.09	1.7	2.86
ENSMUSG00000022469	Rapgef3	-0.198438	0.645514	2.16	2.71	2.03	1.88
ENSMUSG00000014232	Cluap1	-0.198072	0.537228	8.08	7.35	6.99	6.7
ENSMUSG00000066043	Phactr4	-0.198036	0.141355	11.99	10.79	9.81	10.42
ENSMUSG00000001065	Zfp276	-0.19801	0.452634	4.55	4.06	3.61	4.03
ENSMUSG00000033088	Triobp	-0.197928	0.0319771	34.67	32.99	30.22	29.81
ENSMUSG00000020601	Trib2	-0.19785	0.740622	1.5	1.4	1.21	1.07
ENSMUSG00000120992	ENSMUSG00000120992	-0.197789	0.226945	11.12	11.79	10.24	10.13
ENSMUSG00000028619	Tceanc2	-0.19763	0.521714	6.36	6.39	4.92	6.76
ENSMUSG00000024276	Zfp397	-0.197486	0.430618	3.09	3.1	2.71	2.79
ENSMUSG00000024304	Cdh2	-0.197398	0.511512	3.2	3.38	3.06	2.97
ENSMUSG00000024319	Vps52	-0.197229	0.130428	15.54	15.87	13.29	14.61
ENSMUSG00000068479	Mfap1a	-0.197156	0.194538	9.71	10.17	9.34	8.34
ENSMUSG00000061633	Ndufb11b	-0.197087	0.797269	4.49	3.84	3.33	4.05
ENSMUSG00000069014	Gm5641	-0.196883	0.276381	24.79	22.38	20.64	21.24
ENSMUSG00000041438	Utp4	-0.196842	0.00183295	85.9	89.49	76.56	79.33
ENSMUSG00000019471	Cdc37	-0.196789	3.05352e-05	37.27	36.74	32.86	32.94
ENSMUSG00000029034	Ints11	-0.196747	0.020372	42.28	42.52	37.18	38.19
ENSMUSG00000022561	Gpaa1	-0.196663	0.13452	25.19	24.58	23.08	21.66
ENSMUSG00000026728	Vim	-0.196548	0.00848843	72.66	75.58	67.66	64.35
ENSMUSG00000042271	Nxt2	-0.196418	0.666559	3.3	2.9	2.66	2.83
ENSMUSG00000117098	Gm49909	-0.196352	0.0507635	189.87	202.01	170.66	169.68
ENSMUSG00000074406	Zfp628	-0.196345	0.383239	5.78	5.88	5.21	5.17
ENSMUSG00000052698	Tln2	-0.196205	0.0414479	7.88	7.48	7.08	6.91
ENSMUSG00000033356	Pus7l	-0.196184	0.687883	2.3	2.4	2.14	2.04
ENSMUSG00000083111	Gm14421	-0.196179	0.783065	1.89	2.17	1.7	1.91
ENSMUSG00000025647	Shisa5	-0.19594	0.307971	17.34	17.78	14.49	15.45
ENSMUSG00000037463	Fbxo27	-0.195835	0.673224	3.8	3.95	3.41	3.49
ENSMUSG00000032557	Uba5	-0.195632	0.106688	24.64	23.4	21.08	21.64
ENSMUSG00000049076	Acap2	-0.195618	0.0700815	12.36	13.12	11.43	11.47
ENSMUSG00000019916	P4ha1	-0.195325	0.180768	13.57	13.52	12.29	11.82
ENSMUSG00000059552	Trp53	-0.19514	1.76186e-07	363.86	367.96	327.89	323.12
ENSMUSG00000057778	Cyb5d2	-0.195121	0.805511	1.41	1.56	1.24	1.32
ENSMUSG00000006403	Adamts4	-0.195026	0.715201	1.3	1.55	1.16	1.4
ENSMUSG00000013646	Sh3bp5l	-0.194922	0.114175	18.79	17.86	16.59	15.99
ENSMUSG00000030825	Hsd17b14	-0.194891	0.145587	44.77	47.67	40.42	42.29
ENSMUSG00000021585	Cast	-0.194864	0.106299	22.09	19.16	19.05	18.03
ENSMUSG00000070837	Aurkc	-0.19484	0.829008	2.99	2.44	2.31	2.32
ENSMUSG00000037475	Thoc2	-0.194783	0.0152275	15.72	15.24	14.34	13.24
ENSMUSG00000114353	Gm7896	-0.194744	0.783065	7.8	7.27	5.85	6.12
ENSMUSG00000023952	Gtpbp2	-0.194641	0.26871	11.46	10.82	9.46	10.36
ENSMUSG00000030614	Tmem126b	-0.194608	0.421458	9.41	8.55	7.84	8.13
ENSMUSG00000020687	Cdc27	-0.194594	0.00356085	27.84	26.62	24.4	23.78
ENSMUSG00000029821	Gsdme	-0.194241	0.75962	1.18	1.3	0.92	1.18
ENSMUSG00000066278	Vps37b	-0.193847	0.387294	9.16	8.49	7.78	7.94
ENSMUSG00000030263	Irag2	-0.193665	0.388806	10.91	10.11	10.03	8.71
ENSMUSG00000037958	Nsrp1	-0.193572	0.110686	17.63	17.37	15.87	15.31
ENSMUSG00000070644	Etnk2	-0.193208	0.654334	3.66	3.75	3.43	3.15
ENSMUSG00000026398	Nr5a2	-0.193068	0.0218263	32.13	32.96	30.7	28.15
ENSMUSG00000046204	Pnma2	-0.19297	0.379024	4.88	3.97	3.84	3.52
ENSMUSG00000030059	Tmf1	-0.192797	0.172256	7.79	7.36	6.58	6.92
ENSMUSG00000022248	Rad1	-0.192664	0.283757	22.08	21.46	19.02	19.53
ENSMUSG00000037300	Ttc13	-0.192613	0.120504	17.59	16.78	15.86	15.18
ENSMUSG00000024853	Sf3b2	-0.19253	5.73101e-06	133.08	131.61	117	118.96
ENSMUSG00000040562	Gstm2	-0.192321	0.214431	43.3	43.83	39.11	38.52
ENSMUSG00000001774	Chordc1	-0.192306	0.058085	37.92	40.7	35.45	32.27
ENSMUSG00000022614	Lmf2	-0.192298	0.126154	17.79	18.51	16.09	16.29
ENSMUSG00000015747	Vps45	-0.192292	0.49912	5.81	6.39	5.73	5.17
ENSMUSG00000020253	Ppm1m	-0.192157	0.376136	13.88	15.36	12.34	13.75
ENSMUSG00000014303	Glis2	-0.192129	0.16197	13.46	12.57	11.37	11.83
ENSMUSG00000016427	Ndufa1	-0.192034	0.41311	174.05	189.62	146.72	175.68
ENSMUSG00000041995	Zbed3	-0.191917	0.57942	6.38	6.59	5.54	6.03
ENSMUSG00000028681	Ptch2	-0.191908	0.284896	6.57	6.94	6.17	5.89
ENSMUSG00000013662	Atad1	-0.191711	0.126617	21.61	23.81	21.77	18.79
ENSMUSG00000020424	Castor1	-0.191583	0.1273	40.01	43.9	38.62	36.28
ENSMUSG00000079038	D130040H23Rik	-0.191536	0.799904	2.71	1.87	2.1	2.11
ENSMUSG00000035151	Elmod2	-0.191495	0.64828	1.82	1.92	1.66	1.74
ENSMUSG00000062444	Ap3b2	-0.191493	0.606382	2.66	3.02	2.72	2.35
ENSMUSG00000029029	Wrap73	-0.191451	0.415881	14.13	13.53	12.05	12.61
ENSMUSG00000043067	Dpy19l1	-0.191245	0.0399646	20.64	20.31	18.52	18.5
ENSMUSG00000015750	Aph1a	-0.191133	0.103734	24.99	24.85	22.02	23.39
ENSMUSG00000051316	Taf7	-0.191114	0.0142817	34.73	33.91	31	30.26
ENSMUSG00000051396	Gm45902	-0.191087	0.608207	2.62	2.4	2.4	2.09
ENSMUSG00000032666	1700025G04Rik	-0.190907	0.572025	1.12	1.18	1.02	1.03
ENSMUSG00000054477	Kcnn2	-0.190816	0.785539	1.17	1.5	1.4	1.49
ENSMUSG00000002104	Rapsn	-0.190785	0.842364	1.49	1.95	1.64	1.42
ENSMUSG00000029228	Lnx1	-0.190603	0.667465	3.22	3.17	2.65	3.07
ENSMUSG00000021996	Esd	-0.190467	0.0462941	107.11	108.01	89.28	98.72
ENSMUSG00000028410	Dnaja1	-0.190262	6.21677e-05	92.13	93.59	82.36	83.26
ENSMUSG00000021179	Nrde2	-0.190156	0.144081	13.08	13.4	11.62	12.02
ENSMUSG00000031077	Fadd	-0.189943	0.718499	1.43	1.77	1.38	1.49
ENSMUSG00000004264	Phb2	-0.189876	6.80805e-05	340.36	339.25	296.75	309.79
ENSMUSG00000002325	Irf9	-0.18985	0.462267	6.73	7.81	6.54	6.67
ENSMUSG00000064370	mt-Cytb	-0.189821	4.03442e-07	2413.84	2373.17	2078	2193.83
ENSMUSG00000031150	Ccdc120	-0.189718	0.339555	7.14	7.38	6.82	6.15
ENSMUSG00000015748	Prpf3	-0.189609	0.0231263	34.69	34.4	31.12	30.49
ENSMUSG00000025762	Larp1b	-0.189449	0.594942	6.31	5.45	5.12	5.31
ENSMUSG00000053730	Tmem39b	-0.189395	0.433996	11.7	11.42	10	10.63
ENSMUSG00000027488	Snta1	-0.189382	0.379733	12.4	11.18	10.57	10.49
ENSMUSG00000036398	Ppp1r11	-0.18933	0.276381	61.11	64.94	54.09	49.28
ENSMUSG00000040483	Xaf1	-0.189294	0.834444	1.3	1.47	0.86	1.92
ENSMUSG00000029507	Pus1	-0.189285	0.0760154	51.16	53.12	49.86	44.22
ENSMUSG00000024610	Cd74	-0.189263	0.811135	2.98	2.99	2.64	2.71
ENSMUSG00000032388	Spg21	-0.189229	0.159195	19.27	19.95	17.61	17.29
ENSMUSG00000026520	Pycr2	-0.189199	0.00725489	101.75	98.22	88.64	89.95
ENSMUSG00000005198	Polr2a	-0.189097	7.66596e-08	195.85	192.76	177.92	169.49
ENSMUSG00000057375	Yipf1	-0.189096	0.429417	17.11	18.47	15.4	16.37
ENSMUSG00000062611	Rps3a2	-0.189081	0.625799	20.85	16.89	17.13	16.5
ENSMUSG00000039648	Kyat1	-0.189031	0.668622	4.61	4.28	3.86	4.07
ENSMUSG00000078879	Zfp973	-0.188955	0.661004	7.43	7.58	7.16	6.28
ENSMUSG00000074221	Zfp568	-0.188889	0.000147033	46.44	45.81	43.73	42.59
ENSMUSG00000022972	Cfap298	-0.188796	0.318008	23.3	24.44	20.24	22.41
ENSMUSG00000035051	Dhx57	-0.188776	0.114212	11.74	11.71	10.78	10.2
ENSMUSG00000003526	Prodh	-0.188733	0.446632	8.41	8.13	7.54	7.3
ENSMUSG00000028159	Dapp1	-0.188698	0.510372	5.31	4.93	4.33	4.82
ENSMUSG00000024767	Otub1	-0.188649	0.0348692	57.57	58.95	51.58	52.55
ENSMUSG00000090093	Gm14399	-0.188439	0.606382	8.17	7.46	6.75	7.75
ENSMUSG00000051146	Camk2n2	-0.188437	0.837282	2.24	2.37	1.89	2.23
ENSMUSG00000044231	Nhlrc1	-0.188294	0.834159	1.16	1.22	1.13	0.99
ENSMUSG00000021690	Jmy	-0.188125	0.260781	3.89	3.58	3.38	3.29
ENSMUSG00000037601	Nme1	-0.188043	0.00844161	52.79	55.71	49.55	48.58
ENSMUSG00000025155	Dus1l	-0.187923	0.00929657	74.52	72.89	66.51	65.38
ENSMUSG00000034893	Cog3	-0.187905	0.145274	11.99	11.82	11.01	10.3
ENSMUSG00000034343	Ube2f	-0.187828	0.333327	19.07	21.29	18.09	18.93
ENSMUSG00000046311	Zfp62	-0.1878	0.304181	7.51	7.3	6.71	6.53
ENSMUSG00000046280	She	-0.187734	0.622582	1.77	1.63	1.62	1.42
ENSMUSG00000091474	2610021A01Rik	-0.187697	0.176321	11.5	12.2	10.99	10.23
ENSMUSG00000036533	Cdc42ep3	-0.187672	0.649224	4.14	3.93	3.51	3.7
ENSMUSG00000003233	Dvl3	-0.187639	0.0845496	20.87	21.55	19.13	20.17
ENSMUSG00000029617	Ccz1	-0.187545	0.174315	29.55	31.81	28.48	26.45
ENSMUSG00000031311	Nono	-0.187527	6.35673e-06	187.25	185.52	169.21	164.32
ENSMUSG00000073779	Lrp8os2	-0.187396	0.684339	2.53	2.43	2.05	2.38
ENSMUSG00000039568	Ubald1	-0.187319	0.255062	22.67	20.67	18.91	19.83
ENSMUSG00000036376	Abt1	-0.187247	0.169904	10.06	10.2	8.93	9.21
ENSMUSG00000028465	Tln1	-0.187209	0.00060647	30.64	30.61	28.24	26.59
ENSMUSG00000040383	Aqr	-0.187186	0.00271423	41.76	40.19	37.75	35.53
ENSMUSG00000015668	Pdzd11	-0.187148	0.495934	17.08	19.77	15.43	16.65
ENSMUSG00000019842	Traf3ip2	-0.187019	0.61657	3.54	3.6	3.13	3.27
ENSMUSG00000024589	Nedd4l	-0.186965	0.280023	7.85	8.19	7.68	7.6
ENSMUSG00000032554	Trf	-0.18691	0.57938	5.01	4.69	4.64	4.15
ENSMUSG00000046572	Zfp518b	-0.186808	0.0138065	17.61	16.93	15.61	15.32
ENSMUSG00000023272	Creld2	-0.186201	0.0837498	57.22	56.08	50.48	50.91
ENSMUSG00000116048	Septin2	-0.186146	0.190164	23.85	19.79	20.41	18.67
ENSMUSG00000029147	Ppm1g	-0.186075	0.000135623	137.37	140.97	126.72	126.05
ENSMUSG00000000915	Hip1r	-0.185725	0.227287	6.51	5.77	5.55	5.44
ENSMUSG00000006058	Snf8	-0.185527	0.0771409	92.35	95.27	82.07	85.3
ENSMUSG00000031365	Zfp275	-0.185511	0.359775	4.25	3.88	3.78	3.51
ENSMUSG00000021484	Lman2	-0.185232	0.0154483	28.51	27.95	24.77	25.82
ENSMUSG00000025047	Pdcd11	-0.185211	8.66631e-05	44.14	44.11	39.8	39.3
ENSMUSG00000028890	Mtf1	-0.184932	0.292669	4.85	4.6	3.9	4.56
ENSMUSG00000019796	Lrp11	-0.184833	0.136214	15.63	16.04	14.18	14.21
ENSMUSG00000113836	Gm3325	-0.184717	0.48607	6.33	6.67	5.93	5.94
ENSMUSG00000032936	Camkv	-0.184716	0.634462	4.04	3.07	3.08	3.25
ENSMUSG00000027575	Arfgap1	-0.184363	0.141781	20.53	20.41	18.23	18.4
ENSMUSG00000073423	Zfp414	-0.184344	0.443569	22.6	20.61	20.64	18.08
ENSMUSG00000024909	Efemp2	-0.184293	0.620138	7.83	6.87	6.4	6.94
ENSMUSG00000054753	AU018091	-0.184185	0.000395673	76.65	74.63	67.74	67.91
ENSMUSG00000008301	Phax	-0.183951	0.163646	27.58	26.65	24.41	24.33
ENSMUSG00000043510	Hscb	-0.183912	0.534387	25.22	25.8	23.53	22.19
ENSMUSG00000029073	Cptp	-0.183857	0.662086	3.33	3.23	3.04	2.85
ENSMUSG00000034295	Fhod3	-0.183689	0.694289	1.54	1.39	1.4	1.23
ENSMUSG00000026483	Niban1	-0.183626	0.0861516	10.5	10.57	9.67	9.06
ENSMUSG00000028964	Park7	-0.183624	0.00116129	336.55	350.97	307.67	308.42
ENSMUSG00000042515	Pwwp3b	-0.183578	0.745691	1.22	1.19	1.07	1.04
ENSMUSG00000001025	S100a6	-0.183505	0.75929	15.59	15.61	13.41	13.05
ENSMUSG00000073468	Sft2d1	-0.183465	0.487657	20.6	22.24	18.48	19.91
ENSMUSG00000055720	Ubl7	-0.18342	0.263083	30.38	29.79	26.34	27.59
ENSMUSG00000035246	Pcyt1b	-0.183299	0.0755809	14.15	14.25	12.71	12.78
ENSMUSG00000059920	4930453N24Rik	-0.183252	0.239562	6.6	7.09	6.09	6.2
ENSMUSG00000095975	Cphx1	-0.183115	0.641287	7.97	6.31	6.54	6.26
ENSMUSG00000024501	Dpysl3	-0.183105	0.0562371	19.69	21.23	19.21	18.38
ENSMUSG00000074698	Csnk2a1	-0.183067	5.47777e-05	83.15	81.86	74.54	73.56
ENSMUSG00000044149	Nkrf	-0.183011	0.336437	7.64	8.25	7.44	7.18
ENSMUSG00000019659	Ccdc12	-0.182948	0.381127	40.38	40.46	35.9	36.49
ENSMUSG00000029580	Actb	-0.182858	1.30278e-08	1161.96	1195.53	1074.79	1041.06
ENSMUSG00000097530	Kansl2-ps	-0.182738	0.859139	2.08	1.89	1.23	2.29
ENSMUSG00000027968	Larp7	-0.182682	0.0677305	39.98	38.44	34.8	35.55
ENSMUSG00000037211	Spry1	-0.18262	0.605138	5.98	5.14	5.6	4.42
ENSMUSG00000031297	Slc7a3	-0.182369	0.00184179	91.53	91.42	82.72	80.99
ENSMUSG00000016481	Cr1l	-0.182169	0.489379	10.04	10.52	9.21	9.31
ENSMUSG00000055560	Zfp459	-0.182117	0.233745	12.82	11.83	11.25	10.88
ENSMUSG00000041189	Chrnb1	-0.182048	0.832844	1.43	1.32	1.31	1.17
ENSMUSG00000024376	Epb41l4a	-0.182045	0.0522504	24.49	26.01	22.56	22.81
ENSMUSG00000047205	Dusp18	-0.182028	0.619302	2.16	2.53	2.07	2.14
ENSMUSG00000055319	Sec23ip	-0.181751	0.0416426	20.02	20.02	18.3	17.68
ENSMUSG00000057219	Armc7	-0.181637	0.719919	3.1	2.94	2.58	2.84
ENSMUSG00000030729	Pgm2l1	-0.181627	0.53149	1.56	1.61	1.44	1.4
ENSMUSG00000003824	Syce2	-0.181582	0.283206	37.23	37.99	32.7	33.95
ENSMUSG00000006398	Cdc20	-0.181495	0.000660335	153.26	150.23	135.43	137.11
ENSMUSG00000101952	Gm10550	-0.181337	0.837282	5.16	3.2	3.95	3.51
ENSMUSG00000034566	Atp5h	-0.18128	0.0391248	376.25	393.18	327.73	361.95
ENSMUSG00000109274	Gm45133	-0.180985	0.657907	3.7	3.37	2.87	3.48
ENSMUSG00000015850	Adamtsl4	-0.180949	0.754329	1.37	1.26	1.14	1.22
ENSMUSG00000056917	Sipa1	-0.180937	0.413794	6.8	7.31	6.35	6.45
ENSMUSG00000078185	Chml	-0.180892	0.366119	3.65	3.88	3.61	3.7
ENSMUSG00000049904	Tmem17	-0.18086	0.784417	2.85	3.35	2.58	2.99
ENSMUSG00000042292	Mrtfa	-0.180764	0.215571	9.49	9.48	8.38	8.68
ENSMUSG00000024560	Cxxc1	-0.180747	0.0861088	29.18	29.33	27.24	25.38
ENSMUSG00000100801	Gm15459	-0.180727	0.301854	19.41	17.73	17.06	16.31
ENSMUSG00000030750	Nsmce1	-0.180654	0.396478	26.99	29.36	24.19	26.41
ENSMUSG00000043702	Pde12	-0.180566	0.192082	5.57	5.68	5.01	5.11
ENSMUSG00000009013	Dynll1	-0.180487	0.004684	165.56	161.49	141.77	148.87
ENSMUSG00000006310	Zbtb32	-0.180279	0.561318	11.14	12.03	11.11	9.21
ENSMUSG00000030269	Mtmr14	-0.180218	0.129382	25.2	23.24	21.61	21.93
ENSMUSG00000039278	Pcsk1n	-0.180132	0.72547	3.19	2.96	2.87	2.66
ENSMUSG00000038058	Nod1	-0.179957	0.0465734	23.07	22.35	20.87	19.84
ENSMUSG00000030842	Lamtor1	-0.179805	0.0689835	87.03	89.87	81.12	77.97
ENSMUSG00000060935	Tmem263	-0.179752	0.400626	7.31	6.67	6.6	5.98
ENSMUSG00000025860	Xiap	-0.179645	0.0860322	10.76	10.88	9.95	9.46
ENSMUSG00000036315	Polr1h	-0.17944	0.357585	59.18	61.72	52.71	56.01
ENSMUSG00000029802	Abcg2	-0.178963	0.274286	14.68	14.82	14.28	13.34
ENSMUSG00000004642	Slbp	-0.178884	0.0353349	60.9	64.39	57.27	55.32
ENSMUSG00000074194	Zfp791	-0.178704	0.814759	1.22	1.4	1.21	1.29
ENSMUSG00000051341	Zfp52	-0.178533	0.68672	2.44	3.1	2.64	2.43
ENSMUSG00000055093	Rps27a-ps3	-0.178407	0.8376	12.56	23.76	17.57	15.25
ENSMUSG00000022354	Ndufb9	-0.178348	0.111446	151.5	159.95	136.5	143.27
ENSMUSG00000020523	Fam114a2	-0.178334	0.065182	35.26	34.31	32.28	30.45
ENSMUSG00000002227	Mov10	-0.178282	0.000578191	73.88	74.45	66.66	66.84
ENSMUSG00000027305	Ndufaf1	-0.178207	0.423402	18.19	18.4	16.61	16.69
ENSMUSG00000071654	Uqcc3	-0.178102	0.502789	32.13	29.93	29.65	26.2
ENSMUSG00000059278	Naa38	-0.178075	0.326377	88.66	98.4	78.09	89.85
ENSMUSG00000028251	Tstd3	-0.177946	0.688444	5.4	5.85	4.97	5.17
ENSMUSG00000025001	Hells	-0.177793	0.000143918	56.44	55.13	50.14	50.37
ENSMUSG00000038213	Tapbpl	-0.17779	0.867768	1.24	0.89	1.21	0.71
ENSMUSG00000019877	Serinc1	-0.177749	0.144735	22.21	20.58	19.55	18.99
ENSMUSG00000039501	Znfx1	-0.177665	0.0951505	11.52	11.53	10.91	10.5
ENSMUSG00000046861	Hectd3	-0.177635	0.25269	8.92	8.8	8.4	7.56
ENSMUSG00000024269	Tpgs2	-0.177588	0.440286	4.95	5.41	4.68	4.66
ENSMUSG00000067367	Lyar	-0.177521	0.0372195	72.22	71.08	65.06	63.99
ENSMUSG00000020706	Ftsj3	-0.177487	2.09446e-05	140.19	140.74	126.52	126.58
ENSMUSG00000120850	ENSMUSG00000120850	-0.177459	0.846772	2.47	2.23	2.06	2.14
ENSMUSG00000011096	Akt1s1	-0.177409	0.23163	34.77	32.56	29.34	31.61
ENSMUSG00000047153	Khnyn	-0.177408	0.230224	10.94	11.36	10.44	9.66
ENSMUSG00000121489	1810014B01Rik	-0.17735	0.838024	1.83	1.79	1.58	1.71
ENSMUSG00000025436	Atp23	-0.177236	0.620205	13.53	14.13	12.51	12.71
ENSMUSG00000025373	Rnf41	-0.177146	0.226649	13.5	13.83	12.05	12.61
ENSMUSG00000096696	Zfp960	-0.177098	0.498029	8.15	7.1	6.51	7.23
ENSMUSG00000027808	Serp1	-0.177096	0.110788	15.95	16.68	14.03	15.37
ENSMUSG00000067825	Pex26	-0.176918	0.510003	4.1	4.61	3.97	3.92
ENSMUSG00000053801	Grwd1	-0.176706	0.0287748	63.3	62.42	57.57	55.74
ENSMUSG00000013593	Ndufs2	-0.176601	0.00135566	156.51	159.67	142.62	142.33
ENSMUSG00000005410	Mcm5	-0.176484	4.53598e-06	224.68	223.7	204.04	196.36
ENSMUSG00000028693	Nasp	-0.176481	2.05579e-06	281.39	285.78	255.56	255.12
ENSMUSG00000032563	Mrpl3	-0.176387	0.203994	14.75	14.58	13.28	13.87
ENSMUSG00000038305	Spats2l	-0.176386	0.649224	3.58	3.21	3.14	3.05
ENSMUSG00000012429	Mplkip	-0.176375	0.474649	8.49	8.93	8.64	7.25
ENSMUSG00000107002	0610012G03Rik	-0.176356	0.369048	21.74	22.6	19.27	20.67
ENSMUSG00000068335	Dok1	-0.17633	0.755534	3.4	3.67	2.76	3.61
ENSMUSG00000045576	St7l	-0.176267	0.724049	2.36	2.42	2.43	2.15
ENSMUSG00000050530	Fam171a1	-0.17626	0.593239	2.93	3.11	2.67	2.77
ENSMUSG00000031885	Cbfb	-0.176259	0.125768	25.3	23.19	21.74	21.98
ENSMUSG00000026112	Coa5	-0.176178	0.0277115	29.32	28.49	25.98	26.15
ENSMUSG00000005103	Wdr1	-0.176164	0.0318453	39.17	41.8	37.19	36.3
ENSMUSG00000017446	C1qtnf1	-0.17614	0.83787	1.17	1.36	1.34	0.95
ENSMUSG00000022945	Chaf1b	-0.176123	0.0255113	63.99	64.55	57.57	58.33
ENSMUSG00000025185	Loxl4	-0.176044	0.799171	1.05	1.28	1.01	1.02
ENSMUSG00000030082	Sec61a1	-0.176017	0.000330553	94.91	96.47	86.95	85.67
ENSMUSG00000020027	Socs2	-0.175875	0.270375	21.56	20.81	18.91	20.53
ENSMUSG00000098923	Tmem185b	-0.175818	0.663886	3.68	3.83	2.98	3.81
ENSMUSG00000022141	Nipbl	-0.175516	0.0110258	15.12	14.88	13.77	13.3
ENSMUSG00000050199	Lgr4	-0.175424	0.074049	15.72	16.62	14.57	14.62
ENSMUSG00000039483	Asb6	-0.175419	0.236904	10.97	10.69	9.3	10.23
ENSMUSG00000044715	Gskip	-0.175403	0.684339	4.15	4.93	3.77	4.23
ENSMUSG00000029544	Cabp1	-0.175275	0.631548	10.26	11.35	10.94	9.94
ENSMUSG00000009630	Ppp2cb	-0.175244	0.058085	68.02	68.02	61.12	61.57
ENSMUSG00000025453	Nnt	-0.175242	0.326272	10.62	11.98	10.74	9.52
ENSMUSG00000020265	Sumo3	-0.175214	0.00705375	78.48	83.57	72.18	71.91
ENSMUSG00000012483	Rpa3	-0.175212	0.306922	84.95	92.09	76.67	82.64
ENSMUSG00000026753	Ppp6c	-0.175175	0.20942	15.96	14.81	12.5	12.07
ENSMUSG00000049929	Lpar4	-0.175149	0.762082	1.16	1.61	1.21	1.29
ENSMUSG00000113691	Gm38699	-0.175112	0.599072	7.79	8.19	6.89	7.49
ENSMUSG00000062526	Mppe1	-0.174947	0.696002	3.28	3.23	2.93	2.92
ENSMUSG00000025257	Ribc1	-0.174901	0.790853	3.25	3.17	3.07	2.73
ENSMUSG00000089704	Galnt2	-0.174883	0.0191538	30.89	30.51	27.39	28.02
ENSMUSG00000047649	Cd3eap	-0.174767	0.346366	13.64	13.73	12.5	12.2
ENSMUSG00000030982	Vps35l	-0.174593	0.0663765	25.13	24.49	23.46	22.26
ENSMUSG00000008036	Ap2s1	-0.174443	0.149095	100.62	100.73	94.37	87.27
ENSMUSG00000035898	Uba6	-0.174414	0.0643439	13.82	13.85	12.98	12.02
ENSMUSG00000020905	Usp43	-0.174349	0.521642	3.94	3.59	3.43	3.37
ENSMUSG00000022191	Drosha	-0.174344	0.000306254	70.98	70.99	65.22	63.01
ENSMUSG00000021905	Dph3	-0.174326	0.389404	12.74	14.34	10.36	11.04
ENSMUSG00000052906	Ubxn8	-0.174223	0.57074	5.13	5.33	4.51	4.93
ENSMUSG00000040822	1700123O20Rik	-0.174083	0.361612	22.38	24.21	22.64	21.82
ENSMUSG00000032294	Pkm	-0.174016	5.01564e-09	1861.01	1891.95	1723.48	1665.12
ENSMUSG00000030780	Rusf1	-0.173987	0.668792	4.19	3.59	3.27	3.73
[truncated: 9,389 more rows]

## Sheet: GABPB1_B2_12h_RNA
Table S1. Differentially expressed genes in mESCs with GABPB1 and GABPB2 degradation for 12 hours (dTAG vs DMSO).
Gene_id	Gene_name	log2FoldChange	padj	DMSO_Rep1	DMSO_Rep2	dTAG_Rep1	dTAG_Rep2
ENSMUSG00000116207	Nnt	-23.4199	3.79542e-05	0	6.86	0	0
ENSMUSG00000066632	Pgk1-rs7	-9.86056	2.12624e-09	9.28	9.86	0	0.02
ENSMUSG00000067147	Rpl7a-ps11	-9.44461	1.64559e-08	12.35	13.84	0	0
ENSMUSG00000028670	Lypla2	-4.04352	2.67559e-59	32.66	25.23	1.51	2.12
ENSMUSG00000058706	0610030E20Rik	-3.89877	3.16549e-32	3.96	4.52	0.25	0.33
ENSMUSG00000031066	Usp11	-3.57104	5.29394e-88	18.14	18.27	1.49	1.62
ENSMUSG00000024896	Minpp1	-3.30771	4.76753e-55	17.03	16.48	1.98	1.45
ENSMUSG00000003382	Etv3	-3.16369	1.30925e-32	4.65	4.7	0.48	0.57
ENSMUSG00000043251	Exoc3l	-3.13601	5.79823e-12	3.37	3.97	0.3	0.58
ENSMUSG00000028322	Exosc3	-3.1232	6.54952e-45	40.61	37.4	4.79	4.4
ENSMUSG00000073775	Kti12	-3.11095	1.3182e-34	17.49	16.87	1.96	2.11
ENSMUSG00000031617	Tmem184c	-3.07272	4.2918e-34	9.68	11.33	1.41	1.12
ENSMUSG00000019761	Krt10	-3.01022	0.000882187	3.16	2.79	0.22	0.45
ENSMUSG00000113149	Gm49383	-3.00539	2.13073e-05	4.42	3.92	0.78	0.33
ENSMUSG00000050846	Zfp623	-2.87822	2.52043e-12	4.55	3.53	0.56	0.56
ENSMUSG00000089872	Rps6kc1	-2.77916	2.83174e-26	5.87	5.16	0.86	0.77
ENSMUSG00000049957	Ccdc137	-2.72954	2.91357e-27	9.35	8.19	1.41	1.27
ENSMUSG00000045854	Lyrm2	-2.67505	0.00419164	12.91	9.3	2.75	0.94
ENSMUSG00000020973	Dnaaf2	-2.66952	2.33796e-09	2.65	2.09	0.43	0.35
ENSMUSG00000001285	Myg1	-2.5735	2.21598e-30	27	25.63	3.59	5.52
ENSMUSG00000002763	Pex6	-2.5705	3.13354e-42	19.25	14.65	2.84	2.97
ENSMUSG00000030727	Rabep2	-2.51945	4.94344e-31	15.72	14.4	2.96	2.32
ENSMUSG00000034786	Gpsm3	-2.48572	3.81532e-05	3.79	4.16	0.91	0.53
ENSMUSG00000031021	Tmem9b	-2.47577	3.46477e-05	2.8	3.14	0.64	0.44
ENSMUSG00000027618	Nfs1	-2.38646	1.40585e-30	18.37	20.61	3.72	4.28
ENSMUSG00000116138	C030006K11Rik	-2.38579	5.62627e-05	3.08	2.68	0.66	0.46
ENSMUSG00000034152	Exoc3	-2.35234	9.51698e-35	8.06	9.16	1.56	1.87
ENSMUSG00000051735	Rinl	-2.32941	7.48079e-32	12.78	12.12	2.59	2.45
ENSMUSG00000030036	Mogs	-2.28366	1.3266e-29	17.66	13.4	3.09	3.41
ENSMUSG00000029513	Prkab1	-2.28088	1.39962e-37	24.38	24.83	5.7	4.53
ENSMUSG00000025272	Tro	-2.27644	1.25751e-17	3.34	3.82	0.98	0.65
ENSMUSG00000024414	Mrpl27	-2.25963	1.26748e-26	58.24	54.74	12.03	12.49
ENSMUSG00000113786	Gm49384	-2.25582	0.00238711	4.84	5.63	1.73	0.48
ENSMUSG00000047084	Ngrn	-2.23236	3.57053e-31	41.54	33.77	8.33	8.1
ENSMUSG00000091811	Inafm1	-2.22427	0.00266585	3.06	1.8	0.42	0.65
ENSMUSG00000074797	Itpa	-2.22148	3.82816e-46	49.05	52.62	10.63	11.69
ENSMUSG00000041231	Ublcp1	-2.19513	2.76213e-29	22.11	26.58	6.26	4.57
ENSMUSG00000067365	Tmem128	-2.19048	8.38346e-08	7.77	11.56	1.96	2.78
ENSMUSG00000030127	Cops7a	-2.18141	2.58685e-71	81.18	76.08	17.99	17.93
ENSMUSG00000014873	Surf2	-2.1809	1.75988e-20	23.07	23.7	4.96	5.68
ENSMUSG00000041375	Ccdc9	-2.09318	2.62124e-19	18.79	12.85	3.98	3.41
ENSMUSG00000034290	Nek9	-2.04285	1.17003e-45	12.57	13.09	3.16	3.16
ENSMUSG00000020455	Trim11	-2.04087	8.5215e-30	19.64	16.31	4.18	4.53
ENSMUSG00000031897	Psmb10	-2.01903	3.59835e-09	10.44	9.46	2.35	2.69
ENSMUSG00000081476	Itpa-ps1	-1.95262	0.000355107	17.86	12.91	3.33	5.28
ENSMUSG00000022971	Ifnar2	-1.89688	1.89696e-05	6.19	5.29	1.72	2.11
ENSMUSG00000042472	Zfp410	-1.87467	4.71132e-18	10.56	11.41	3.08	3.01
ENSMUSG00000004789	Dlst	-1.84781	2.39885e-48	36.76	36.62	9.94	10.81
ENSMUSG00000030037	Mrpl53	-1.83914	5.54317e-12	37.81	39.34	9.71	12.9
ENSMUSG00000021891	Mettl6	-1.82364	9.7793e-22	11.94	10.15	3.61	3.08
ENSMUSG00000020978	Klhdc2	-1.81801	1.39591e-14	12.07	13.37	3.85	3.48
ENSMUSG00000031534	Smim19	-1.79057	0.0390287	2.62	1.85	0.77	0.55
ENSMUSG00000038812	Trmt112	-1.78638	5.80876e-25	79.71	68.41	24.57	19.94
ENSMUSG00000037816	Fbxw17	-1.77723	0.000145754	3.57	4.24	1.14	1.18
ENSMUSG00000034274	Thoc5	-1.77091	2.39885e-48	51.36	54.8	15.5	16.15
ENSMUSG00000020263	Appl2	-1.76887	2.58722e-14	7.34	8.21	2.32	2.32
ENSMUSG00000027804	Ppid	-1.7677	9.21703e-67	114.96	116.5	35.05	34.25
ENSMUSG00000079478	Znrd2	-1.76215	2.17527e-17	59.63	58.73	17.81	18.61
ENSMUSG00000033900	Map9	-1.75067	1.30501e-07	1.7	2.03	0.56	0.56
ENSMUSG00000074064	Mlycd	-1.74473	0.00809268	2	1.81	0.52	0.64
ENSMUSG00000021611	Tert	-1.73367	2.07307e-17	6.86	6.51	2.01	2.07
ENSMUSG00000074405	Zfp865	-1.72951	7.11714e-19	9.98	8.01	2.54	2.86
ENSMUSG00000027953	Slc50a1	-1.72713	2.34105e-05	10.05	10.91	2.57	3.97
ENSMUSG00000062906	Hdac10	-1.72239	0.00076479	2.31	2.48	0.72	0.77
ENSMUSG00000028467	Gba2	-1.71084	4.97558e-16	7.8	7.67	2.5	2.29
ENSMUSG00000027406	Idh3b	-1.7019	1.36137e-44	71.11	72.5	22.85	22.69
ENSMUSG00000054312	Mrps21	-1.6929	2.57118e-11	125.27	110.48	37.82	38.26
ENSMUSG00000040351	Ankib1	-1.68565	1.62013e-15	4.01	4.34	1.27	1.36
ENSMUSG00000030615	Tmem126a	-1.68531	1.43276e-07	21.18	20.2	6.87	6.45
ENSMUSG00000031156	Slc35a2	-1.68477	2.7023e-09	7.69	7.97	2.57	1.95
ENSMUSG00000067847	Romo1	-1.68476	6.22038e-07	57.97	54.85	21.57	18.88
ENSMUSG00000066438	Plekhd1	-1.68164	7.19343e-05	2.05	2.22	0.65	0.71
ENSMUSG00000037049	Smpd1	-1.67956	0.00100573	3.66	2.41	1.25	0.67
ENSMUSG00000046675	Tmem251	-1.66996	0.000247532	1.96	2.18	0.75	0.57
ENSMUSG00000102627	Snurf	-1.66311	0.73208	111.1	175.97	115.17	10.04
ENSMUSG00000025956	Mettl21a	-1.65948	0.000845181	3.31	3.4	0.79	1.41
ENSMUSG00000057649	Brd9	-1.63305	1.49059e-15	13.33	14.58	4.07	5.11
ENSMUSG00000031513	Leprotl1	-1.62769	1.44111e-08	5.46	5.19	1.89	1.61
ENSMUSG00000033712	Ccar2	-1.61594	1.14731e-30	19.74	18.11	6.19	6.36
ENSMUSG00000073684	Faap20	-1.61239	8.46386e-09	17.32	16.01	5.97	5.5
ENSMUSG00000022973	Synj1	-1.61028	3.52451e-13	4.29	4.5	1.73	1.17
ENSMUSG00000030798	Cd37	-1.61017	0.00169851	3.54	3.28	1.5	0.82
ENSMUSG00000039841	Zfp800	-1.5863	0.00152687	1.56	1.79	0.62	0.54
ENSMUSG00000018733	Pex12	-1.58343	1.1103e-10	8.25	8.7	3.09	2.8
ENSMUSG00000022090	Pdlim2	-1.58231	0.18992	2.74	1.37	0.55	1.11
ENSMUSG00000064023	Klk8	-1.57375	2.80319e-06	11.83	9.41	3.25	4.09
ENSMUSG00000031105	Slc25a14	-1.56894	0.0122688	3.63	3	1.37	0.85
ENSMUSG00000054676	1600014C10Rik	-1.56712	0.000193047	5.01	3.4	1.93	1.79
ENSMUSG00000073982	Rhog	-1.5573	0.000769392	6.78	6.13	1.79	2.74
ENSMUSG00000024953	Prdx5	-1.55434	5.11116e-16	52.71	40.87	17.07	16
ENSMUSG00000047866	Lonp2	-1.55056	1.363e-15	13.74	16.32	5.31	5.14
ENSMUSG00000033488	Cryzl2	-1.54332	0.0121858	3.21	3.55	0.99	1.68
ENSMUSG00000021597	Slf1	-1.5341	7.43378e-08	4.59	5.34	1.39	2.11
ENSMUSG00000033285	Wdr3	-1.52336	6.68522e-35	32.45	35.77	12.56	11.51
ENSMUSG00000040374	Pex2	-1.51935	0.165421	1.15	1.87	0.52	0.74
ENSMUSG00000022559	Fbxl6	-1.51711	5.11116e-16	26.31	22.91	9.38	8.15
ENSMUSG00000036948	Trappc14	-1.51384	4.0284e-10	10.29	8.72	3.45	3.51
ENSMUSG00000046096	Mosmo	-1.51041	1.128e-08	6.82	7.37	4.15	2.67
ENSMUSG00000042419	Nfkbil1	-1.50687	0.00117708	8.34	4.77	2.65	2.11
ENSMUSG00000014402	Tsg101	-1.50124	3.17691e-20	25.82	24.91	9.03	9.23
ENSMUSG00000044991	Shld1	-1.48532	0.0182067	4.76	4.68	1.7	1.78
ENSMUSG00000033114	Slc35d2	-1.47058	0.112364	1.32	1.83	0.37	0.68
ENSMUSG00000062554	Gm12751	-1.46959	0.276693	17.91	15.16	11.02	2.5
ENSMUSG00000084957	Bbip1	-1.4685	0.00171438	12.25	11.73	3.58	5.25
ENSMUSG00000026377	Nifk	-1.46809	3.97698e-22	41.41	46.75	14.51	18.01
ENSMUSG00000034226	Rhov	-1.46086	0.107414	1.72	1.75	0.71	0.57
ENSMUSG00000025016	Tm9sf3	-1.45815	1.99109e-31	30.8	33.57	13.06	11.55
ENSMUSG00000067561	Dmrtc1c2	-1.45586	0.0434121	3.85	3.48	1.64	0.67
ENSMUSG00000031916	Cog8	-1.44948	5.81324e-23	18.57	17.87	6.29	6.64
ENSMUSG00000002846	Timmdc1	-1.44365	2.57735e-08	12.24	12.34	4.63	4.6
ENSMUSG00000038733	Wdr26	-1.44185	2.10624e-31	15.02	16.74	6.09	5.72
ENSMUSG00000079179	Rab10os	-1.4391	7.70482e-08	5.32	5.08	2.04	1.9
ENSMUSG00000071252	2210408I21Rik	-1.43689	0.0629109	1.37	2	0.4	0.74
ENSMUSG00000038520	Tbc1d17	-1.43627	2.79061e-14	16.79	12.9	3.47	4.27
ENSMUSG00000027207	Galk2	-1.43318	2.34404e-13	16.38	17.02	6.12	6.28
ENSMUSG00000028468	Rgp1	-1.42803	1.51029e-15	8.77	8.06	3.64	2.6
ENSMUSG00000028842	Ago3	-1.42699	2.43829e-15	2.49	3.03	1.07	1.01
ENSMUSG00000030545	Pex11a	-1.42539	1.73659e-05	5.25	6.32	1.93	2.47
ENSMUSG00000000600	Krit1	-1.4243	5.7943e-15	15.24	17.26	5.3	6.8
ENSMUSG00000021890	Eaf1	-1.41793	4.88434e-32	21.56	22.58	8.09	8.69
ENSMUSG00000029649	Pomp	-1.41789	1.32414e-31	156.43	110.31	46.16	53.99
ENSMUSG00000039929	Urb1	-1.41283	2.24798e-33	17.12	18.75	7.08	6.56
ENSMUSG00000027890	Gstm4	-1.40114	0.00277795	4.93	4.62	1.99	1.58
ENSMUSG00000118181	Gm53015	-1.39744	0.229806	4.49	5.07	1.94	2.06
ENSMUSG00000014859	E2f4	-1.39588	4.69996e-38	82.12	80.43	32.56	30.34
ENSMUSG00000026577	Blzf1	-1.39228	9.44579e-11	11.82	12.04	4.9	4.85
ENSMUSG00000048200	Cracr2b	-1.38688	0.196953	1.55	1.61	0.82	0.39
ENSMUSG00000060063	Alox5ap	-1.38674	0.112753	2.71	2.76	0.88	1.27
ENSMUSG00000028187	Rpf1	-1.38092	4.81508e-18	32.92	31.35	13.04	12.04
ENSMUSG00000117748	Derpc	-1.37857	0.0773267	1.3	2.63	1.11	0.42
ENSMUSG00000021819	Zswim8	-1.37845	6.45956e-13	6.3	5.25	2.24	2.26
ENSMUSG00000040592	Cd79b	-1.3751	0.0243126	4.54	3.92	1.61	1.54
ENSMUSG00000057895	Zfp105	-1.3622	4.76628e-05	5.6	6.34	2.36	2.37
ENSMUSG00000102305	Gm38192	-1.35878	0.179072	1.33	1.68	0.45	0.75
ENSMUSG00000028729	Ebna1bp2	-1.35436	7.71081e-30	42.15	38.04	15.58	16.32
ENSMUSG00000017288	Vps53	-1.34938	6.68914e-17	20.02	19.85	7.4	8.32
ENSMUSG00000024299	Adamts10	-1.34322	0.00520921	2.4	1.54	0.9	0.8
ENSMUSG00000025218	Poll	-1.33732	7.75073e-08	11.21	9.95	4.99	3.5
ENSMUSG00000091803	Cox16	-1.33597	0.000364174	20.76	22.51	7.94	11.01
ENSMUSG00000020878	Lrrc46	-1.33559	0.328908	1.47	1.72	0.81	0.47
ENSMUSG00000030768	Disp1	-1.33377	1.17694e-05	2.65	3.01	1.01	1.29
ENSMUSG00000021550	2210016F16Rik	-1.32948	1.92224e-06	7.34	5.81	2.2	3.15
ENSMUSG00000008153	Clstn3	-1.32811	4.75158e-15	16.64	11.86	5.68	6.71
ENSMUSG00000021932	Rnaseh2b	-1.32713	2.71506e-15	33.32	37.07	13.4	15.29
ENSMUSG00000026575	Nme7	-1.32654	2.71506e-15	28.2	31.56	12.44	11.65
ENSMUSG00000029403	Cdkl2	-1.32341	0.000138713	2.66	3.2	1.27	1.23
ENSMUSG00000019917	Septin10	-1.32107	4.20224e-06	6.25	8.3	2.74	3.04
ENSMUSG00000121300	Gm1070	-1.32072	0.00543816	2.28	2.63	0.84	1.18
ENSMUSG00000038510	Rpf2	-1.31146	5.21893e-15	36.98	42.07	15.84	16.29
ENSMUSG00000039233	Tbce	-1.30541	2.34096e-06	9.64	11.71	3.84	5.02
ENSMUSG00000022847	Thpo	-1.3036	0.287169	1.68	1.45	0.95	0.27
ENSMUSG00000032519	Slc25a38	-1.30085	1.68678e-09	15.82	14.6	6.36	6.24
ENSMUSG00000032308	Ulk3	-1.30085	0.00785972	2.61	2.2	0.82	1.17
ENSMUSG00000023806	Rsph3b	-1.2958	0.0869558	1.89	2.4	1.01	0.78
ENSMUSG00000017664	Slc35c2	-1.29123	8.36317e-08	12.77	10.99	5.33	4.38
ENSMUSG00000022313	Utp23	-1.29086	3.31978e-05	10.6	10.09	3.29	4.99
ENSMUSG00000066652	Lefty2	-1.28342	1.79364e-36	113.29	120.33	45.95	51.73
ENSMUSG00000022422	Dscc1	-1.28196	0.000114421	9.5	9.65	3.79	4.3
ENSMUSG00000078087	Rps12l1	-1.2819	0.933254	51.83	41.68	42.08	0
ENSMUSG00000060601	Nr1h2	-1.28095	7.83717e-23	50.24	45.57	19.34	20.61
ENSMUSG00000046761	Fam83h	-1.2751	3.06373e-08	5.47	4.62	2.15	2.08
ENSMUSG00000024477	Pggt1b	-1.2743	5.50421e-12	6.67	6.02	2.13	3.1
ENSMUSG00000023795	Pisd-ps2	-1.27202	0.406802	1.8	1.93	1.16	0.47
ENSMUSG00000091780	Sco2	-1.27048	0.063337	5.68	4.55	1.4	3.1
ENSMUSG00000025470	Zfp511	-1.25476	3.61387e-05	15.9	14.49	6.25	6.87
ENSMUSG00000004043	Stat5a	-1.25148	0.0441629	1.52	1.34	0.77	0.42
ENSMUSG00000030742	Lat	-1.24943	0.171441	3.28	2.43	1.43	1.03
ENSMUSG00000027099	Mtx2	-1.24921	2.83593e-08	7.84	7.82	3.33	3.36
ENSMUSG00000055305	Zfp93	-1.2455	0.00196005	3.11	3.52	1.48	1.38
ENSMUSG00000024442	Dele1	-1.23529	4.95074e-13	18.65	18.77	8.73	7.68
ENSMUSG00000031165	Was	-1.23042	0.0208094	3.14	2.6	1.31	1.19
ENSMUSG00000029003	Mad2l2	-1.22744	1.00177e-06	18.89	17.69	7.87	7.62
ENSMUSG00000011114	Tbrg1	-1.22502	8.37428e-23	47.21	47.15	20.75	20.41
ENSMUSG00000024423	Impact	-1.22481	1.56418e-23	36.32	43.03	16.98	17.48
ENSMUSG00000097277	2900076A07Rik	-1.22062	0.222292	1.58	1.63	0.58	0.65
ENSMUSG00000047238	Mageh1	-1.22048	0.0603904	3.5	3.54	1.66	1.42
ENSMUSG00000051457	Spn	-1.21639	0.00113629	2.83	2.58	1.01	1.37
ENSMUSG00000026499	Acbd3	-1.20831	2.00419e-13	13.91	15.3	6.87	5.94
ENSMUSG00000041845	Rhod	-1.20476	0.00768054	5.93	5.81	2.74	2.39
ENSMUSG00000056019	Zfp709	-1.2028	0.00724247	1.57	1.52	0.44	0.66
ENSMUSG00000056592	Zfp658	-1.19959	0.0219731	1.69	1.7	0.67	0.83
ENSMUSG00000020389	Cdkl3	-1.19875	0.0201969	2.94	3.55	1.29	1.54
ENSMUSG00000035498	Cdcp1	-1.19774	0.00567662	1.3	1.62	0.64	0.65
ENSMUSG00000039810	Zc3h10	-1.19711	1.01671e-09	11.51	9.01	4.79	4.3
ENSMUSG00000027366	Sppl2a	-1.1916	3.74175e-05	3.14	3.85	1.23	1.89
ENSMUSG00000056820	Tsnax	-1.18769	3.39884e-14	21.47	21	9.57	9.41
ENSMUSG00000045455	Gm9797	-1.18608	0.0262049	44.53	44.4	4.92	12.67
ENSMUSG00000035683	Melk	-1.18517	2.95373e-17	25.05	28.82	11.82	12.25
ENSMUSG00000041079	Rwdd2b	-1.18218	0.00284709	4.96	4.35	2.03	2.16
ENSMUSG00000078931	Pdf	-1.18174	0.00215364	9.67	9.82	3.32	5.56
ENSMUSG00000037570	Mcrs1	-1.18118	8.15525e-21	49.8	51.92	21.89	24.24
ENSMUSG00000038880	Mrps34	-1.17961	4.27847e-10	64.59	52.28	25.89	27.52
ENSMUSG00000052921	Arhgef15	-1.17111	7.63163e-06	4.06	3.84	1.74	1.88
ENSMUSG00000027865	Gdap2	-1.16897	0.00131592	3.31	3.57	1.56	1.61
ENSMUSG00000041193	Pla2g5	-1.16829	0.211998	2	1.65	0.82	0.81
ENSMUSG00000106820	D5Ertd605e	-1.16669	0.307685	2.43	2.81	1.25	1.14
ENSMUSG00000039128	Cdc123	-1.16361	5.37498e-16	36.84	40.18	16.97	18.11
ENSMUSG00000020311	Erlec1	-1.15499	8.44697e-07	8.44	9.56	4.02	4.2
ENSMUSG00000029389	Ddx55	-1.15023	3.80558e-07	8.99	8.08	3.76	4.08
ENSMUSG00000042759	Apobr	-1.14925	0.00119369	3	3.23	1.39	1.24
ENSMUSG00000069844	Sco1	-1.14819	4.56749e-11	16.7	18.6	7.9	8.26
ENSMUSG00000017747	Ghdc	-1.14562	1.1128e-06	9.08	8.86	4.33	3.91
ENSMUSG00000002319	Ipo4	-1.14367	3.07237e-26	37.19	35.47	16.59	16.81
ENSMUSG00000039210	Gpatch2	-1.14357	3.91927e-10	10.77	9.67	4.56	4.27
ENSMUSG00000042694	Stn1	-1.14289	2.9945e-05	9.4	9.07	4.43	3.8
ENSMUSG00000001518	Itfg2	-1.14121	2.34515e-07	12.23	10.16	5.17	5.2
ENSMUSG00000026171	Rnf25	-1.13592	5.18742e-07	17.2	20.97	8.71	8.98
ENSMUSG00000044551	9930012K11Rik	-1.13423	0.0594102	2.79	2.8	1.08	1.53
ENSMUSG00000032842	Abcc10	-1.13225	0.000137937	3.06	2.67	1.32	1.33
ENSMUSG00000027010	Slc25a12	-1.13195	2.3491e-13	9.01	10.52	4.71	4.31
ENSMUSG00000032215	Rsl24d1	-1.12464	5.14324e-22	83.09	87.97	43.87	43.45
ENSMUSG00000098332	Pigbos1	-1.12216	0.399348	8.55	9.16	6.08	2.43
ENSMUSG00000013701	Timm23	-1.12006	6.9842e-26	152.57	149.15	69.92	72.57
ENSMUSG00000031823	Zdhhc7	-1.11869	0.000323359	4.68	4.05	2.04	2.06
ENSMUSG00000015474	Ppt2	-1.11448	3.275e-05	11.18	10.69	5.2	5.55
ENSMUSG00000018661	Cog1	-1.11287	4.6064e-15	15.71	17.43	8.1	8.05
ENSMUSG00000048330	Ric3	-1.11152	3.65288e-05	3.49	3.63	1.49	1.58
ENSMUSG00000030929	Eri2	-1.11052	4.274e-05	4.86	5.95	2.58	2.7
ENSMUSG00000070610	Gm13127	-1.11013	0.291731	2.49	2.02	1.25	0.91
ENSMUSG00000032078	Zpr1	-1.10573	4.43831e-17	29.27	27.47	12.77	14.06
ENSMUSG00000000486	Septin1	-1.10238	2.58023e-24	166.21	145.71	73.74	74.98
ENSMUSG00000106918	Mrpl33	-1.0999	2.13885e-06	93.27	99.41	42.75	53.66
ENSMUSG00000015790	Surf1	-1.0981	2.24059e-05	23.26	18.27	10.21	9.72
ENSMUSG00000086629	2810403D21Rik	-1.09798	0.427531	2.14	1.45	1.05	1.05
ENSMUSG00000026927	Entr1	-1.09738	7.92169e-12	24.25	25.17	12.2	11.33
ENSMUSG00000047989	Ino80c	-1.09573	7.98525e-09	13.7	13.62	6.6	6.2
ENSMUSG00000073888	Ccl27a	-1.09454	0.220198	9.05	8.53	5.91	5.26
ENSMUSG00000020910	Adprm	-1.09268	2.03365e-05	15.86	18.23	7.75	8.61
ENSMUSG00000024911	Fibp	-1.092	4.98787e-07	25.59	23.75	12.4	11.32
ENSMUSG00000073096	Lrrc61	-1.09017	0.11848	1.62	1.45	0.79	0.71
ENSMUSG00000022814	Umps	-1.08986	2.04555e-23	48.48	48.22	21.71	24.48
ENSMUSG00000020474	Polm	-1.08962	1.2521e-05	7.32	6.39	3.29	3.19
ENSMUSG00000021576	Pdcd6	-1.08957	7.23542e-11	46.4	50.71	21.63	25.3
ENSMUSG00000037773	Pced1a	-1.08571	0.0276051	3.2	2.3	1.51	1.14
ENSMUSG00000059878	Zfp422	-1.08564	0.0245996	2.72	2.31	1.3	0.99
ENSMUSG00000046410	Kcnk6	-1.08537	0.0231847	1.71	1.78	0.96	0.71
ENSMUSG00000039166	Akap7	-1.08129	0.00768107	4.56	3.93	2.02	1.94
ENSMUSG00000046229	Scand1	-1.07818	0.0107826	29.34	15.47	11.17	11.05
ENSMUSG00000038671	Arfrp1	-1.0775	3.73127e-06	14.17	13.97	6.21	8.71
ENSMUSG00000011658	Fuz	-1.07554	0.000504347	10.17	9.75	5.16	4.89
ENSMUSG00000022503	Nubp1	-1.07367	1.61305e-14	36.4	32.89	16.95	16.61
ENSMUSG00000047557	Lxn	-1.07291	0.222292	3.18	4.06	1.81	1.7
ENSMUSG00000038793	Lefty1	-1.06932	2.33273e-07	20.75	18.27	9.7	9.32
ENSMUSG00000000001	Gnai3	-1.06507	1.0388e-14	39.69	47.52	19.23	23.14
ENSMUSG00000054226	Tprkb	-1.06442	0.000143174	10.19	11.36	4.95	6.29
ENSMUSG00000007867	Ift43	-1.06392	0.145502	8.22	7.44	4.82	2.91
ENSMUSG00000043311	D17H6S53E	-1.06183	0.156452	2.44	1.8	0.85	1.23
ENSMUSG00000061028	Clasrp	-1.0607	6.65773e-09	28.59	21.61	12.78	11.74
ENSMUSG00000043621	Ubxn10	-1.06037	0.125119	1.64	1.62	0.97	0.61
ENSMUSG00000027963	Extl2	-1.06009	0.0821504	1.85	1.67	0.86	0.88
ENSMUSG00000008226	Scrn3	-1.05799	1.54619e-06	11.52	11.77	6.62	5.15
ENSMUSG00000015023	Ddx19a	-1.05547	1.21505e-17	37.06	38.37	18.86	18.04
ENSMUSG00000027331	Knstrn	-1.05502	2.42786e-08	21.27	17.39	9.26	7.46
ENSMUSG00000031875	Cmtm3	-1.0546	0.00578966	6.53	6.71	3.71	2.97
ENSMUSG00000036743	Psma8	-1.05456	0.000968264	8.16	8.25	4.11	4.21
ENSMUSG00000075227	Znhit2	-1.05381	0.000966612	13.12	11.3	5.47	6.66
ENSMUSG00000036721	Zscan12	-1.05299	0.000239746	5.86	5.42	3.06	2.67
ENSMUSG00000068048	Rhox9	-1.04782	0.423513	2.92	3.58	1.82	1.42
ENSMUSG00000022833	Ccdc14	-1.04521	4.98787e-07	9.51	12.68	5.98	4.75
ENSMUSG00000023104	Rfc2	-1.0402	6.19167e-19	22.98	22.01	10.68	11.53
ENSMUSG00000101009	1700108F19Rik	-1.03882	0.545643	3.68	4.08	1.93	0.55
ENSMUSG00000071229	Timm8a2	-1.03819	0.479292	2.39	3.17	1.42	1.35
ENSMUSG00000003309	Ap1m2	-1.03621	3.60375e-06	13.9	14.3	7.41	5.96
ENSMUSG00000067931	Zfp948	-1.03549	0.0337184	2.44	3.56	1.42	1.55
ENSMUSG00000095648	Gm2004	-1.03463	0.950354	3.09	5.66	4.34	0
ENSMUSG00000040610	Tlx3	-1.03391	0.337488	1.83	2.1	0.97	0.99
ENSMUSG00000020083	Fam241b	-1.03356	0.161533	3.59	3.47	2.05	1.71
ENSMUSG00000050357	Carmil2	-1.03003	0.00362825	3.03	2.38	1.37	1.33
ENSMUSG00000035203	Epn1	-1.02871	1.07734e-12	44.78	35.84	20.61	19.31
ENSMUSG00000031711	Zfp330	-1.02412	3.23649e-09	25.32	27.26	13.47	12.88
ENSMUSG00000026848	Tor1b	-1.02274	1.83083e-08	12.05	12.26	6.38	5.76
ENSMUSG00000047098	Rnf31	-1.01877	3.82936e-14	21.48	20.57	10.21	10.88
ENSMUSG00000052253	Zfp622	-1.01776	5.48615e-15	36.06	31.71	17.48	16.55
ENSMUSG00000019969	Psen1	-1.01718	1.7081e-10	17.67	18.09	8.95	9.17
ENSMUSG00000029617	Ccz1	-1.01714	1.17171e-10	32.43	37.37	16.77	18.41
ENSMUSG00000039725	Trp53rka	-1.01468	0.00055803	8.82	7.97	4.14	4.36
ENSMUSG00000034259	Exosc4	-1.0123	2.51672e-06	22.66	17.13	9.86	10.31
ENSMUSG00000121476	ENSMUSG00000121476	-1.01108	0.000140541	7.72	9.8	4.03	4.85
ENSMUSG00000047261	Gap43	-1.01099	0.479145	1.66	1.6	0.89	0.76
ENSMUSG00000102644	Thap6	-1.01074	0.00424496	3.86	5.05	2.15	2.58
ENSMUSG00000043155	Hpdl	-1.00971	0.016023	4.84	5.36	2.67	2.48
ENSMUSG00000020491	2810021J22Rik	-1.00217	0.00135607	3.82	3.84	1.63	2.27
ENSMUSG00000027408	Cpxm1	-1.00201	5.89796e-06	11.03	10.53	5.19	5.78
ENSMUSG00000025733	Rhot2	-1.00153	1.63224e-15	27.98	26.75	14.03	13.75
ENSMUSG00000035378	Shq1	-0.995557	2.50778e-07	14.82	14.25	7.99	6.9
ENSMUSG00000030924	Rexo5	-0.995309	0.203181	2.39	1.94	1.38	0.77
ENSMUSG00000035759	Bbs10	-0.992804	0.118367	1.81	2.04	1.1	0.86
ENSMUSG00000025737	Wdr24	-0.989663	1.42468e-07	11.69	11.8	5.52	6.52
ENSMUSG00000019039	Dalrd3	-0.986712	1.42535e-10	35.23	32.91	18.34	16.78
ENSMUSG00000120109	Gm40003	-0.984172	0.257824	10.23	8.56	4.58	5.47
ENSMUSG00000032093	Cd3e	-0.983972	0.44776	1.57	2.14	1.11	0.78
ENSMUSG00000025271	Pfkfb1	-0.983466	0.0148267	5.35	6.01	2.96	2.89
ENSMUSG00000084822	Myadml2os	-0.978322	0.53162	2.11	2.57	1.45	0.97
ENSMUSG00000097078	Gm26566	-0.970705	0.639563	3.52	1.48	2.15	0.49
ENSMUSG00000087135	Gm16096	-0.969933	0.56758	3.13	4.24	2.89	0.92
ENSMUSG00000035293	G2e3	-0.967121	3.74205e-07	7.25	9.33	3.99	4.31
ENSMUSG00000000374	Trappc10	-0.966098	1.18382e-06	5.79	6.43	3.29	3.05
ENSMUSG00000025450	Gm9752	-0.965818	0.18375	1.72	2.22	0.75	1.31
ENSMUSG00000037552	Plekhg2	-0.961779	2.42587e-05	5.31	5.01	2.96	2.43
ENSMUSG00000028999	Rint1	-0.961348	1.15291e-05	8.33	9.93	4.56	4.46
ENSMUSG00000034789	Rab24	-0.960095	0.00044581	26.58	18.83	12.43	11.6
ENSMUSG00000042854	Trp53rkb	-0.957525	0.0742516	2.35	1.53	0.89	1.02
ENSMUSG00000039814	Xkr5	-0.952967	0.00166917	5.09	5.18	2.43	2.89
ENSMUSG00000011958	Bnip2	-0.950377	8.04296e-08	16.9	17.01	9.37	9
ENSMUSG00000002064	Sdf2	-0.950299	4.13371e-07	34.42	33.59	16.42	19.75
ENSMUSG00000113477	Gm45965	-0.945703	0.429828	2.21	2.48	1.38	1.13
ENSMUSG00000021911	Parg	-0.945147	1.85202e-13	22.88	25.07	11.9	12.79
ENSMUSG00000057572	Zbtb8os	-0.944127	1.42799e-05	28.63	19.88	11.8	12.52
ENSMUSG00000032002	Dcun1d5	-0.939206	3.07662e-08	28.2	25.05	15.1	12.06
ENSMUSG00000040345	Arhgap9	-0.937174	0.0205005	5.68	5.42	3.22	2.73
ENSMUSG00000038525	Armc10	-0.930449	5.54317e-12	33.85	36.1	18.39	19
ENSMUSG00000073889	Il11ra1	-0.930363	0.218644	2.7	2.34	1.44	1.29
ENSMUSG00000043602	Zfp3	-0.929627	0.444531	1.45	1.2	0.69	0.73
ENSMUSG00000038578	Susd1	-0.929006	0.0606451	2.11	2.37	1.07	1.32
ENSMUSG00000038550	Ciart	-0.928579	0.143664	3.72	4.58	1.99	2.61
ENSMUSG00000038039	Gcc2	-0.927755	3.64553e-08	8.08	9.18	4.14	5.07
ENSMUSG00000113712	Gm38428	-0.927544	0.319598	2.62	4.03	1.67	1.94
ENSMUSG00000022560	Slc52a2	-0.923848	0.00156376	4	2.84	1.88	1.78
ENSMUSG00000042042	Csgalnact2	-0.922128	0.0488068	1.99	2.62	1.33	1.13
ENSMUSG00000078932	CN725425	-0.920916	0.436776	1.25	1.56	0.72	0.78
ENSMUSG00000014856	Tmem208	-0.919371	0.00043017	32.91	31.14	17.08	17.98
ENSMUSG00000004096	Cwc15	-0.918938	2.76043e-11	79.41	79.95	43.02	45.2
ENSMUSG00000005505	Kbtbd4	-0.918575	1.87802e-05	12.84	11.74	7.26	6.01
ENSMUSG00000058126	Tpm3-rs7	-0.916852	0.308687	2.45	1.8	1.52	0.77
ENSMUSG00000082044	Snrpert	-0.915881	0.331148	76.4	68.44	60.46	42.27
ENSMUSG00000047656	Trpt1	-0.914881	0.603778	2.34	1.59	1.04	1.12
ENSMUSG00000020260	Pofut2	-0.914657	1.6023e-05	17.61	14.52	7.69	9.71
ENSMUSG00000026767	Mindy3	-0.913679	0.00179234	7.74	9.76	3.98	5.48
ENSMUSG00000027698	Nceh1	-0.912044	0.00025454	4.24	4.51	2.41	2.3
ENSMUSG00000004561	Mettl17	-0.910382	2.48708e-05	18.24	17.79	9.32	10.32
ENSMUSG00000032571	Pik3r4	-0.909829	7.27839e-14	21.05	22.63	12.11	12.13
ENSMUSG00000062822	4833420G17Rik	-0.909574	5.71256e-09	17.32	18.23	8.99	9.77
ENSMUSG00000035078	Mtmr9	-0.90882	5.16696e-08	20.07	23.7	12.5	11.17
ENSMUSG00000041638	Gcn1	-0.907526	3.06425e-22	33.42	31.52	18	17.06
ENSMUSG00000064356	mt-Atp8	-0.904932	0.151378	3617.72	4030.91	3395.79	3337.79
ENSMUSG00000079469	Pigb	-0.902837	1.2867e-06	14	13.71	7.77	7
ENSMUSG00000047909	Ankrd16	-0.902711	0.0228315	6.3	6.82	3.68	3.47
ENSMUSG00000051235	Gen1	-0.900079	7.69148e-05	4.9	6.47	3.16	3.01
ENSMUSG00000102070	Gm28661	-0.894851	0.695829	4546.39	2548.35	2808.43	1193.07
ENSMUSG00000035678	Tnfsf9	-0.894023	0.247752	3.64	4.1	1.95	2.32
ENSMUSG00000025747	Tyms	-0.891587	1.2668e-09	18.67	20.05	10.48	10.72
ENSMUSG00000048007	Timm8a1	-0.891548	3.65044e-07	31.62	30.3	17.18	16.97
ENSMUSG00000003581	Rnf215	-0.890908	0.0245607	6.17	5.22	3.16	3.11
ENSMUSG00000078201	Tmem203	-0.889768	0.271764	6.62	6.02	3.55	3.51
ENSMUSG00000039269	2300002M23Rik	-0.889645	0.636571	1.57	1.4	0.85	0.79
ENSMUSG00000038022	Mindy4	-0.888458	0.210893	1.61	1.21	0.67	0.85
ENSMUSG00000079043	Fastkd5	-0.886341	0.000945818	6.04	7.78	3.78	3.81
ENSMUSG00000085028	Slc2a4rg-ps	-0.885445	0.308687	1.89	1.6	1.12	0.62
ENSMUSG00000021254	Gpatch2l	-0.882548	0.000487354	5.27	4.87	2.96	2.54
ENSMUSG00000052906	Ubxn8	-0.881528	0.011113	5.19	4.45	2.29	3.05
ENSMUSG00000033970	Rfc3	-0.880748	5.95096e-06	28.36	29.73	15.01	17.32
ENSMUSG00000091931	Gon7	-0.878234	0.00495595	14.03	15.12	7.5	8.78
ENSMUSG00000059772	Slx1b	-0.876219	0.0039981	5.44	5.06	3.34	2.46
ENSMUSG00000033253	Szt2	-0.873923	2.85239e-13	9.89	8.96	5.26	5.16
ENSMUSG00000040327	Cul9	-0.873643	0.0129725	1.55	1.38	0.88	0.74
ENSMUSG00000001844	Zdhhc4	-0.871704	0.000799985	14.93	16.87	8.95	8.66
ENSMUSG00000113450	Zfp935	-0.87087	0.0183046	4.39	5.61	2.98	2.56
ENSMUSG00000028719	Cmpk1	-0.870752	4.87474e-06	13.46	15.65	7.16	9.04
ENSMUSG00000021621	Zcchc9	-0.868994	0.0155815	8	8.27	4.3	4.81
ENSMUSG00000083992	Gm11478	-0.868887	0.704624	6.05	2.33	2.29	2.63
ENSMUSG00000029049	Morn1	-0.867937	0.549863	1.3	1.76	0.81	0.9
ENSMUSG00000026926	Pmpca	-0.866057	5.41889e-18	62.94	60.98	33.7	34.59
ENSMUSG00000046798	Cldn12	-0.86395	3.11713e-05	7.96	9.32	4.94	4.61
ENSMUSG00000020541	Tom1l1	-0.863944	1.48425e-07	21.11	20.96	10.08	11.38
ENSMUSG00000032041	Tirap	-0.863407	0.0504385	2.49	2.37	1.52	1.24
ENSMUSG00000020303	Stc2	-0.862413	0.0160557	3.08	2.7	1.6	1.64
ENSMUSG00000037938	Chchd5	-0.862252	0.00053713	17.81	16.98	9.96	9.63
ENSMUSG00000095180	Rhox5	-0.862135	0.00321264	31.09	24.36	14.14	17.55
ENSMUSG00000086291	Gm15513	-0.861814	0.592162	1.27	1.65	0.87	0.77
ENSMUSG00000032285	Dnaja4	-0.861363	0.330496	1.34	1.28	0.76	0.71
ENSMUSG00000038500	Prr3	-0.858193	0.000215381	14.51	11.97	7.12	9.32
ENSMUSG00000024382	Ercc3	-0.857877	2.05813e-10	27.51	27.69	15.05	15.93
ENSMUSG00000120430	ENSMUSG00000120430	-0.857362	0.251149	5.65	5.57	3.18	3.11
ENSMUSG00000026705	Klhl20	-0.856839	2.55435e-06	8.99	9.6	5.46	4.94
ENSMUSG00000058388	Phtf1	-0.856575	0.00214025	5.28	6.01	3.09	3.29
ENSMUSG00000021569	Trip13	-0.854918	1.67554e-09	21.71	24.72	12.6	13.47
ENSMUSG00000073616	Cops9	-0.854179	0.0169374	84.93	64.77	43.61	47.56
ENSMUSG00000022091	Sorbs3	-0.854132	0.146326	2.33	1.97	1.28	1.14
ENSMUSG00000072772	Grcc10	-0.851377	1.22338e-05	90.18	68.08	46.65	44.28
ENSMUSG00000011254	Thg1l	-0.850323	8.91115e-05	12.8	12.59	6.6	7.76
ENSMUSG00000024424	Ttc39c	-0.848355	0.0249319	5.56	4.73	2.82	2.91
ENSMUSG00000021598	Med10	-0.847617	0.000118849	41.66	36.11	22.08	22.74
ENSMUSG00000022160	Mettl3	-0.842242	1.22884e-06	22.95	23.2	14.13	12.07
ENSMUSG00000118664	Tusc3	-0.83808	0.00275837	7.11	7.54	3.54	4.82
ENSMUSG00000121438	ENSMUSG00000121438	-0.837209	0.000729587	54.41	59.74	34.73	32.43
ENSMUSG00000014074	Rnf168	-0.836758	2.83518e-08	12.57	12.77	7.34	7.01
ENSMUSG00000028293	Slc35a1	-0.833518	0.000108601	13.71	14	7.56	8.3
ENSMUSG00000005779	Psmb4	-0.833287	3.92065e-15	247.31	224.97	130.88	141.22
ENSMUSG00000067713	Prkag1	-0.830663	5.24223e-07	30.49	29.36	16.69	17.74
ENSMUSG00000055041	Commd5	-0.830465	0.00138162	22.6	24.26	12.4	14.7
ENSMUSG00000005609	Ctr9	-0.829844	2.33567e-11	23.65	26.07	14.48	13.88
ENSMUSG00000002617	Zfp40	-0.829334	0.233596	1.12	1.65	0.82	0.95
ENSMUSG00000018569	Cldn7	-0.828463	0.00602281	18.25	20.96	11.07	11.88
ENSMUSG00000038023	Atp6v0a2	-0.827736	1.14903e-07	9.41	10.15	5.49	5.69
ENSMUSG00000040929	Rfx3	-0.827674	0.0575798	1.39	1.9	0.71	0.72
ENSMUSG00000035049	Rrp12	-0.825165	2.66875e-14	32.42	31.14	18.42	17.97
ENSMUSG00000008763	Man1a2	-0.822746	7.56999e-06	5.01	5.51	3.29	2.72
ENSMUSG00000018848	Rars	-0.822614	1.88329e-15	107.28	109.83	59.31	65.77
ENSMUSG00000030309	Caprin2	-0.820581	0.00047269	7.91	10.71	4.93	5.79
ENSMUSG00000035202	Lars2	-0.81978	0.636571	151.76	61.93	65.49	57.1
ENSMUSG00000033852	Gm28042	-0.819651	0.00062921	4.74	4.93	2.7	2.86
ENSMUSG00000035824	Tk2	-0.819293	0.0173276	5.22	5.5	3.26	3.08
ENSMUSG00000038181	Chpf2	-0.817902	0.0131561	3.44	2.99	1.88	1.56
ENSMUSG00000027166	Dnajc24	-0.814966	0.0601744	8.77	9.3	4.84	5.71
ENSMUSG00000060510	Zfp266	-0.814855	2.97843e-07	9.91	11.03	6.3	5.84
ENSMUSG00000034254	Agpat1	-0.814432	8.1474e-10	38.45	37.57	22.22	22.34
ENSMUSG00000035762	Tmem161b	-0.813966	0.00327881	7	9.79	4.92	4.47
ENSMUSG00000087207	Gm13147	-0.813591	0.050434	9.6	14.04	6.3	7.45
ENSMUSG00000058586	Serhl	-0.812489	0.032833	9.11	8.51	4.53	5.8
ENSMUSG00000022175	Lrp10	-0.810401	2.55567e-05	8.45	7.7	4.45	4.9
ENSMUSG00000023572	Ccndbp1	-0.809826	0.000227481	17.88	17.85	10.19	10.6
ENSMUSG00000072940	Gm10443	-0.808111	0.657715	634.62	494.2	584.1	501.19
ENSMUSG00000057835	Zfp119a	-0.807483	0.504679	1.67	1.4	0.82	0.96
ENSMUSG00000113760	Gm48222	-0.807129	0.349005	12.25	13	8.96	6.3
ENSMUSG00000065999	Zfp985	-0.805511	7.19519e-07	24.81	31.87	16.4	16.54
ENSMUSG00000069899	Gm12166	-0.80363	0.602528	3.08	3.13	1.36	2.37
ENSMUSG00000031256	Cstf2	-0.803511	2.39385e-09	22.28	25.49	13.62	13.87
ENSMUSG00000038775	Vill	-0.802141	0.0273827	7.84	6.44	3.69	3.7
ENSMUSG00000009090	Ap1b1	-0.801855	7.16774e-14	34.9	34.41	20.1	20.26
ENSMUSG00000015290	Ubl4a	-0.801412	0.000402273	12.34	12.75	6.85	8.74
ENSMUSG00000093594	Gm20707	-0.800486	0.29511	2.17	1.8	1.09	1.27
ENSMUSG00000028899	Taf12	-0.800031	0.000601004	8.22	6.4	4.4	4.13
ENSMUSG00000002204	Napsa	-0.799499	0.536972	2.05	1.82	1.07	1.21
ENSMUSG00000030780	Rusf1	-0.798581	0.041679	4.15	4.33	2.72	2.25
ENSMUSG00000021018	Polr2h	-0.797657	5.19369e-05	59.91	52.38	29.95	34.58
ENSMUSG00000029840	Mtpn	-0.79756	7.62897e-09	28.4	34.34	17.39	19.26
ENSMUSG00000021385	Ippk	-0.79299	0.00102475	5.43	4.97	3.27	3.54
ENSMUSG00000006906	Stambp	-0.792466	0.459006	1.64	1.54	0.91	0.97
ENSMUSG00000053173	Rpl18-ps2	-0.790992	0.698969	5.54	4.24	3.14	3.04
ENSMUSG00000019792	Trmt11	-0.79027	0.00452487	7.79	8.66	4.4	5.3
ENSMUSG00000026211	Obsl1	-0.789029	0.0448247	2.84	2.49	1.28	1.53
ENSMUSG00000032328	Tmem30a	-0.788495	4.03167e-07	14.72	16.42	9.07	9.24
ENSMUSG00000038895	Zfp653	-0.787757	0.106749	4.63	3.98	2.88	2.28
ENSMUSG00000036639	Nudt1	-0.787139	0.000312552	42.48	39.78	23.85	22.13
ENSMUSG00000031631	Cfap97	-0.785658	0.0169634	2.96	3.02	1.77	1.63
ENSMUSG00000002104	Rapsn	-0.784217	0.534201	2.16	2.06	1.6	1
ENSMUSG00000089847	Timm10b	-0.781389	0.00315759	37.79	39.75	21.82	22.04
ENSMUSG00000015189	Casd1	-0.781006	0.0883702	2.16	2.83	1.64	1.29
ENSMUSG00000038102	Trappc11	-0.780151	6.29354e-09	18.89	20.34	11.05	12.2
ENSMUSG00000024259	Slc25a46	-0.779518	0.000153817	6.96	8.37	4.59	4.46
ENSMUSG00000027076	Timm10	-0.779394	0.112485	18.37	16.58	11.36	9.87
ENSMUSG00000000317	Bcl6b	-0.779011	0.0242018	3.6	4.18	2.27	2.32
ENSMUSG00000025158	Rfng	-0.778201	2.4726e-06	31.33	25.82	16.97	17.01
ENSMUSG00000119584	Rn18s-rs5	-0.777676	0.685646	1745.64	713.71	813.02	649.83
ENSMUSG00000028848	Gpn2	-0.777459	7.46219e-05	33.43	28.35	19.45	17.61
ENSMUSG00000087179	5730471H19Rik	-0.776816	3.97558e-07	17.59	17.61	10.97	9.92
ENSMUSG00000113047	Gm47469	-0.776808	0.00567011	5.34	6.66	4.22	3.36
ENSMUSG00000019948	Actr6	-0.775238	0.00815276	9.86	11.24	6.13	6.44
ENSMUSG00000043467	Zbtb37	-0.773468	2.40835e-07	4.42	4.35	2.51	2.6
ENSMUSG00000005354	Txn2	-0.773029	3.22462e-08	87.1	73.49	48.37	48.53
ENSMUSG00000026578	Ccdc181	-0.771596	0.146202	3.9	4.36	2.34	2.59
ENSMUSG00000029918	Mrps33	-0.771558	0.000325936	41.36	37.68	20.67	26.49
ENSMUSG00000020133	2310011J03Rik	-0.771087	0.00159087	16.15	14	9.05	9.01
ENSMUSG00000038208	Pgap3	-0.770955	0.198781	3.23	2.52	1.86	1.57
ENSMUSG00000114226	Gm48412	-0.770733	0.625414	4.38	3.62	3.13	1.7
ENSMUSG00000078508	Pramel30	-0.769868	0.594179	1.26	1.86	1.04	0.8
ENSMUSG00000073779	Lrp8os2	-0.769346	0.0606451	3.22	3.4	1.92	2.03
ENSMUSG00000031562	Dctd	-0.768804	0.000169082	18.55	15.27	9.71	10.23
ENSMUSG00000032109	Nlrx1	-0.768674	0.0534662	3.05	2.81	1.74	1.75
ENSMUSG00000115219	Eef1akmt4	-0.767076	0.0575022	12.16	10.23	6.74	6.68
ENSMUSG00000026333	Gin1	-0.765992	0.0860235	6.02	6.98	3.67	3.94
ENSMUSG00000068522	Aard	-0.765957	0.0355889	10.54	9.61	6.01	6.13
ENSMUSG00000030034	Ino80b	-0.764066	0.00577159	24.95	18.75	11.57	13.38
ENSMUSG00000060038	Dhps	-0.763542	0.00101795	19.87	22.47	12.29	13.28
ENSMUSG00000043671	Dpy19l3	-0.7634	0.00332808	2.29	2.49	1.38	1.47
ENSMUSG00000031862	Atp13a1	-0.763058	4.66515e-11	29.83	30.73	18.59	17.61
ENSMUSG00000046441	Cmtr2	-0.760423	0.0997634	2.65	2.33	1.46	1.53
ENSMUSG00000032513	Gorasp1	-0.759599	0.00142633	6.3	5.59	3.67	3.46
ENSMUSG00000059142	Zfp945	-0.758889	0.0092865	2.67	3.45	1.83	1.88
ENSMUSG00000079605	Zbtb9	-0.757647	0.00821122	7.6	7.1	5.12	3.72
ENSMUSG00000034931	Dhx8	-0.757332	2.80686e-14	45.29	46.41	27.5	27.55
ENSMUSG00000041035	Dpcd	-0.756779	0.00187579	21.72	18.42	11.83	12.55
ENSMUSG00000031805	Jak3	-0.756259	0.00103084	9.38	6.94	4.85	5.05
ENSMUSG00000057409	Zfp53	-0.754649	0.11618	2.72	3.55	1.7	2.05
ENSMUSG00000030881	Arfip2	-0.754284	7.82783e-05	16.68	14.63	8.21	9.98
ENSMUSG00000078865	Gm14406	-0.752986	0.324661	5.36	5.18	2.45	2.7
ENSMUSG00000071649	B3gat3	-0.752364	0.0039981	20.33	14.9	11.01	10.39
ENSMUSG00000002603	Tgfb1	-0.750268	0.0772298	4.52	5.15	2.8	3.05
ENSMUSG00000052593	Adam17	-0.749631	4.08444e-08	15.74	16.34	10.92	9.72
ENSMUSG00000039068	Zzz3	-0.748937	8.35522e-09	19.97	23.14	12.21	12.71
ENSMUSG00000006392	Med8	-0.748931	3.52095e-05	36.94	39.54	23.19	23.15
ENSMUSG00000007034	Slc44a4	-0.746943	0.0787086	5.14	4.28	2.81	2.89
ENSMUSG00000055407	Map6	-0.746217	0.0134281	5.06	4.62	2.73	3.06
ENSMUSG00000025138	Sirt7	-0.745756	0.00193838	18.67	15.14	9.59	11.05
ENSMUSG00000019235	Rps6kl1	-0.744484	0.0592475	4.01	3.75	2.29	2.53
ENSMUSG00000010054	Tusc2	-0.742953	0.0013632	16.15	15.3	9.39	9.81
ENSMUSG00000028292	Rars2	-0.742073	0.000160474	18.2	20.04	11.6	11.68
ENSMUSG00000039615	Stub1	-0.741816	3.0916e-07	61.11	49.87	34.44	32.45
ENSMUSG00000059475	Zfp426	-0.741613	0.0399441	4.1	4.51	2.29	2.8
ENSMUSG00000020075	Ddx21	-0.739822	2.01844e-16	123	133.06	78.62	76.94
ENSMUSG00000051146	Camk2n2	-0.73964	0.681719	2.53	1.35	1.3	1.1
ENSMUSG00000028331	Trmo	-0.739264	0.0592013	8.29	7.92	4.63	5.31
ENSMUSG00000072582	Ptrh2	-0.738191	1.30016e-05	14.63	14.73	9.22	8.65
ENSMUSG00000047721	Bola2	-0.73796	0.00216197	62.32	38.75	32.2	30.22
ENSMUSG00000022120	Obi1	-0.737304	0.0685708	3.24	3.49	2.37	2.21
ENSMUSG00000002881	Nab1	-0.736421	0.17395	1.96	2.62	1.61	1.13
ENSMUSG00000024325	Ring1	-0.735903	0.114721	5.6	4.34	3.22	2.87
ENSMUSG00000002963	Pnkp	-0.735555	0.000129751	26.31	20.12	14.56	13.8
ENSMUSG00000002458	Rgs19	-0.735103	0.0037406	17.35	17.25	10.1	12.2
ENSMUSG00000025439	Clns1a	-0.733958	7.34532e-11	100.6	104.94	60.79	65.52
ENSMUSG00000086563	Platr15	-0.73251	0.133545	24.44	16.44	14.59	11.03
ENSMUSG00000079108	Srp54c	-0.732363	2.03813e-05	19.3	21.54	12.52	12.49
ENSMUSG00000041671	Pyroxd1	-0.732137	0.0654025	3.73	4.7	2.52	2.66
ENSMUSG00000019303	Psmc3ip	-0.731355	0.000379383	33.2	28.03	18.52	19.37
ENSMUSG00000044881	Coa4	-0.728221	0.282059	7.23	9.24	4.7	5.39
ENSMUSG00000024271	Elp2	-0.727539	7.29885e-12	46.61	49.85	28.93	29.57
ENSMUSG00000024404	Riok3	-0.727351	1.52233e-06	18.01	21.38	12.05	12.09
ENSMUSG00000032705	Exd2	-0.727313	0.000308192	9.28	9.45	5.73	5.76
ENSMUSG00000070526	Peg12	-0.725402	0.329916	2.12	2.01	1.15	1.4
ENSMUSG00000084786	Ubl5	-0.724041	5.09047e-06	222.66	215.52	124.46	130.77
ENSMUSG00000035086	Becn1	-0.723857	1.83083e-08	39.75	29.34	22.94	23.27
ENSMUSG00000056228	Cars2	-0.723069	0.00551202	13.95	11.27	7.69	7.92
ENSMUSG00000003131	Pafah1b2	-0.721944	2.11846e-06	21.12	17.7	11.94	11.29
ENSMUSG00000020170	Frs2	-0.721479	3.80526e-06	8.62	9.43	5.29	5.81
ENSMUSG00000107928	Gm45140	-0.721389	0.216824	1.54	1.48	0.74	1.15
ENSMUSG00000079083	Jrkl	-0.720878	0.360636	1.38	1.96	0.99	1.06
ENSMUSG00000072704	Smim10l1	-0.72083	0.216716	2.79	2.54	2.2	2.16
ENSMUSG00000030271	Ogg1	-0.719383	0.0228806	11.37	10.54	7.19	6.39
ENSMUSG00000033276	Stk36	-0.71878	0.032088	3.02	2.99	2.15	1.53
ENSMUSG00000064127	Med14	-0.718179	7.17649e-05	7.69	9.35	5.26	4.66
ENSMUSG00000029720	Gm20605	-0.71798	0.000484106	8.24	7.05	4.4	5.04
ENSMUSG00000042211	Fbxo38	-0.717461	2.74355e-08	22.16	24.7	14.44	14.47
ENSMUSG00000074283	Zfp109	-0.716956	0.368156	1.77	2.25	1.11	1.3
ENSMUSG00000074731	Zfp345	-0.716698	0.0507254	4.65	6.51	3.4	3.48
ENSMUSG00000015468	Notch4	-0.716444	0.000988699	4.67	4.06	2.86	2.53
ENSMUSG00000032579	Hemk1	-0.716082	0.133631	4.23	5.26	4.4	2.41
ENSMUSG00000038346	Zfp384	-0.716008	1.19917e-06	21.57	21.53	14.34	13.07
ENSMUSG00000120554	ENSMUSG00000120554	-0.715472	0.710281	1.95	1.54	1.23	0.94
ENSMUSG00000043015	Nemp2	-0.714628	0.118464	2.61	3.6	1.89	1.94
ENSMUSG00000113569	Gm48035	-0.714392	0.548904	2.27	3.17	1.93	1.43
ENSMUSG00000021636	Marveld2	-0.714326	0.408907	1.39	1.95	1.22	0.99
ENSMUSG00000025076	Casp7	-0.714289	0.4311	2.25	1.67	1.21	1.23
ENSMUSG00000046687	Gm5424	-0.713646	0.659189	3.07	1.7	1.36	1.69
ENSMUSG00000002844	Adprh	-0.712603	6.8736e-10	55.11	48.78	32.84	31.59
ENSMUSG00000112449	Srp54b	-0.711407	2.53717e-06	17.79	19.68	12.27	10.94
ENSMUSG00000025196	Cpn1	-0.711296	0.646454	1.94	1.15	0.82	1.12
ENSMUSG00000032011	Thy1	-0.710988	0.39132	3.6	2.94	2.13	1.79
ENSMUSG00000039148	Sart1	-0.710854	2.29341e-08	42.85	34.18	24.54	23.19
ENSMUSG00000027531	Impa1	-0.71081	3.73127e-06	25.06	25.84	17.29	15.04
ENSMUSG00000044211	Gm7887	-0.709551	0.723681	9.43	4.47	5.35	4.05
ENSMUSG00000024937	Ehbp1l1	-0.709217	0.247061	2.08	1.59	1.39	1.11
ENSMUSG00000031934	Panx1	-0.708609	0.0645365	1.92	1.99	1.23	1.19
ENSMUSG00000000355	Mcts1	-0.708258	0.0594102	19.32	23.11	13.28	13.53
ENSMUSG00000020993	Trappc6b	-0.707736	0.00193838	23.29	23.97	13.97	15.4
ENSMUSG00000031917	Nip7	-0.705206	1.67554e-09	51.51	37.27	28.29	23.11
ENSMUSG00000073460	Pnldc1	-0.704042	0.0239244	7.73	8.41	4.73	5.38
ENSMUSG00000029073	Cptp	-0.70266	0.20613	2.66	3.23	1.87	1.8
ENSMUSG00000105987	AI506816	-0.701982	0.000125242	18.35	18	12.23	9.75
ENSMUSG00000050891	Tatdn1	-0.70178	0.375364	8.52	6.56	4.24	5.24
ENSMUSG00000037349	Nudt22	-0.700136	0.126468	12.2	11.1	7.37	7.41
ENSMUSG00000032841	Prr5l	-0.700115	0.411791	1.35	1.43	1.12	0.89
ENSMUSG00000020831	0610010K14Rik	-0.699748	0.000150737	84.9	76.46	50.11	51.84
ENSMUSG00000052712	BC004004	-0.699312	0.000925183	29.55	29.02	16.99	15.13
ENSMUSG00000039917	Rhbdd2	-0.699142	0.00623085	5.36	4.84	3.37	3
ENSMUSG00000071645	Tut1	-0.698526	7.32202e-07	27.17	24.99	16.27	16.42
ENSMUSG00000010406	Mrpl52	-0.698264	0.00295627	184.31	165.48	114.04	123.98
ENSMUSG00000075054	Yae1d1	-0.697581	0.000842592	11.41	13.07	7.91	8.27
ENSMUSG00000030041	M1ap	-0.697238	0.00494203	12.28	11.74	7.43	7.64
ENSMUSG00000034303	Ccdc15	-0.697182	0.235694	2.08	2.33	1.57	1.5
ENSMUSG00000018841	Rad51d	-0.697162	0.0039981	10	8.09	5.39	5.81
ENSMUSG00000062101	Zfp119b	-0.696007	0.398268	2.49	3.15	1.8	1.75
ENSMUSG00000109032	Gm7972	-0.695517	0.764805	1.52	1.84	0.83	1.3
ENSMUSG00000031099	Smarca1	-0.693025	0.171363	1.99	2.28	1.57	1.22
ENSMUSG00000108591	Particl	-0.692927	0.56912	2.61	2.12	1.45	1.56
ENSMUSG00000024668	Sdhaf2	-0.69133	0.00162488	15.42	16.02	8.19	9.51
ENSMUSG00000074457	S100a16	-0.690547	0.783275	1.52	2.65	0.98	2.21
ENSMUSG00000025103	Btbd1	-0.689543	0.000176697	13.39	15.46	8.95	9.21
ENSMUSG00000016239	Lonrf3	-0.688681	0.542504	1.14	1.35	0.84	0.73
ENSMUSG00000082615	Gm13239	-0.687682	0.642419	6.07	6.49	3.64	4.6
ENSMUSG00000004266	Ptpn6	-0.686978	0.000683356	14.99	15.44	9.17	10.13
ENSMUSG00000035726	Supt16	-0.686919	3.97056e-13	91.7	100.45	60.47	60.64
ENSMUSG00000053347	Zfp943	-0.685305	0.513279	1.41	2	1.12	1
ENSMUSG00000079144	A130010J15Rik	-0.684908	0.203939	2.81	3.15	2.04	2.13
ENSMUSG00000121230	ENSMUSG00000121230	-0.683054	0.471787	2.21	1.99	1.16	1.51
ENSMUSG00000028567	Txndc12	-0.682603	0.000537537	27.85	28.12	18.47	17.18
ENSMUSG00000020948	Klhl28	-0.681301	0.0067469	3.29	4.06	2.61	2.61
ENSMUSG00000020522	Mfap3	-0.680739	6.4736e-06	15.25	17.48	9.71	11.01
ENSMUSG00000109584	Gm7997	-0.680251	0.769395	1.87	2.15	1.43	1.14
ENSMUSG00000034037	Fgd5	-0.679904	0.233596	1.18	1.32	0.71	0.88
ENSMUSG00000024926	Kat5	-0.677034	0.00149602	17	16.46	10.17	11.03
ENSMUSG00000020736	Nt5c	-0.67703	0.00493931	37.41	37.35	22.42	26.03
ENSMUSG00000015745	Plekho1	-0.674674	0.682585	1.47	1.14	0.77	0.9
ENSMUSG00000005615	Pcyt1a	-0.674195	0.00285706	8.66	8.6	4.47	5.27
ENSMUSG00000092118	Fancf	-0.673871	0.426922	3.27	2.91	1.98	1.98
ENSMUSG00000007589	Tinf2	-0.673248	1.41219e-05	23.36	21.25	13.84	13.82
ENSMUSG00000041390	Mdfic	-0.672944	0.206017	2.99	2.25	1.96	1.72
ENSMUSG00000029465	Arpc3	-0.672595	6.91595e-07	122.06	119.77	79.52	77.16
ENSMUSG00000014771	Pdcd2	-0.671725	0.00117025	34.23	32.38	20.85	22.13
ENSMUSG00000030752	Kdm8	-0.671203	0.482917	2.28	1.62	1.26	1.24
ENSMUSG00000034032	Rpap1	-0.670441	2.08684e-11	48.55	45.44	30.57	29.41
ENSMUSG00000028797	Tmem234	-0.670089	2.13078e-05	43.42	41.78	26.7	27.36
ENSMUSG00000030220	Arhgdib	-0.669947	0.694649	2.54	2.16	1.24	1.88
ENSMUSG00000000753	Serpinf1	-0.66994	0.721137	1.39	1.33	0.89	0.68
ENSMUSG00000054237	Fra10ac1	-0.668585	0.00634627	19.81	20.6	11.73	14.32
ENSMUSG00000024999	Noc3l	-0.668584	7.94284e-07	23.5	26.62	15.41	16.59
ENSMUSG00000098238	Gm8756	-0.667399	0.709675	2.76	3.31	2.23	1.6
ENSMUSG00000022635	Zcrb1	-0.665998	0.0465779	20.92	22.26	13.39	14.8
ENSMUSG00000087371	Gm15541	-0.663767	0.583161	2.06	1.05	1.03	0.97
ENSMUSG00000078651	Aoc2	-0.663589	0.424275	2.21	1.87	1.35	1.27
ENSMUSG00000073411	H2-D1	-0.663127	0.0107469	11.51	11.58	7.84	7.06
ENSMUSG00000041360	Pum3	-0.663115	4.11022e-10	45.4	45.48	29.01	29.27
ENSMUSG00000042660	Wdr55	-0.662747	0.00069368	35.29	27.76	20.28	20.48
ENSMUSG00000027475	Kif3b	-0.66262	0.000343506	6.46	6.73	4.29	4.15
ENSMUSG00000026480	Ncf2	-0.662399	0.346824	2.21	2.43	1.44	1.49
ENSMUSG00000021556	Golm1	-0.661555	3.43051e-07	22.83	23.97	14.79	15.84
ENSMUSG00000025484	Bet1l	-0.660689	0.0781527	6.34	5.72	4.03	4.38
ENSMUSG00000060803	Gstp1	-0.66001	1.61799e-08	214.15	212.83	133.9	145.82
ENSMUSG00000035248	Tut7	-0.659748	1.67918e-05	11.6	11.96	7.34	7.77
ENSMUSG00000067928	Zfp760	-0.659612	0.0921486	2.67	2.97	1.83	1.8
ENSMUSG00000050150	Slc9b1	-0.659115	0.582398	1.46	1.78	0.99	1.11
ENSMUSG00000034820	Cpsf7	-0.658861	2.97843e-07	26.87	28.21	17.24	18.28
ENSMUSG00000027245	Hypk	-0.658379	0.000882187	113.62	76.9	58.82	59.15
ENSMUSG00000063108	Zfp26	-0.657978	0.00119359	3.82	5.04	2.69	3
ENSMUSG00000059326	Csf2ra	-0.657578	0.063337	12.19	8.93	7.72	5.93
ENSMUSG00000070371	Prss36	-0.656236	0.460509	3.72	3.28	1.64	2.49
ENSMUSG00000036199	Ndufa13	-0.656044	0.000813143	53.42	41.18	30.91	30.78
ENSMUSG00000032717	Mdfi	-0.655794	0.538059	2.98	3.38	1.96	2.23
ENSMUSG00000027272	Ubr1	-0.654793	2.69823e-05	7.83	8.84	5.12	5.62
ENSMUSG00000087174	5530601H04Rik	-0.65475	0.247752	3.75	4.2	2.5	2.22
ENSMUSG00000039096	Rsad1	-0.654293	0.133631	2.58	2.64	1.87	1.49
ENSMUSG00000104164	Gm38248	-0.653691	0.113957	1.87	1.89	1.15	1.27
ENSMUSG00000067942	Zfp160	-0.653269	0.0341116	6.94	7.56	4.6	3.7
ENSMUSG00000033430	Terf2ip	-0.652082	0.0118974	6.54	6.29	4.53	3.75
ENSMUSG00000028223	Decr1	-0.65202	0.138301	3.41	3.99	2.25	2.53
ENSMUSG00000030180	Kdm5a	-0.651846	4.407e-07	10.13	11.64	7.11	6.92
ENSMUSG00000020176	Grb10	-0.650785	0.0568615	2.79	3.38	2.11	1.86
ENSMUSG00000002105	Slc39a13	-0.649828	0.304695	3.79	3.38	2.35	2.66
ENSMUSG00000006941	Eif1b	-0.649514	0.0945048	15.15	13.96	9.23	9.84
ENSMUSG00000002147	Stat6	-0.648284	0.000225309	11.36	11.03	7.07	7.44
ENSMUSG00000092837	Rpph1	-0.648064	0.789426	26.11	14.08	17.18	15.75
ENSMUSG00000027194	Ttc17	-0.647882	0.00442634	6.76	7.36	4.86	4.67
ENSMUSG00000059355	Wdr83os	-0.647265	0.0125991	36.01	33.68	25.72	20.13
ENSMUSG00000001128	Cfp	-0.647093	0.432818	4.39	3.06	2.55	2.33
ENSMUSG00000021379	Id4	-0.64703	0.128211	3.03	3.13	1.71	2.29
ENSMUSG00000034893	Cog3	-0.646985	0.000384466	10.72	13.04	7.82	7.56
ENSMUSG00000031792	Usb1	-0.645679	0.00362825	16.58	16.85	10.77	11.03
ENSMUSG00000078317	F8a	-0.645623	0.649892	1.53	1.05	1.03	0.64
ENSMUSG00000003421	Nosip	-0.645091	3.18406e-05	40.41	37.1	25.51	25.75
ENSMUSG00000024426	Atat1	-0.644691	0.220177	8.28	7.05	6.09	3.86
ENSMUSG00000021024	Psma6	-0.64456	2.02869e-09	196.41	212.09	130.35	138.13
ENSMUSG00000062312	Erbb2	-0.643533	0.0149981	5.19	4.47	3.5	2.76
ENSMUSG00000060716	Plekhh1	-0.64316	3.09812e-06	12.86	12.38	7.86	8.82
ENSMUSG00000036167	Pphln1	-0.643079	0.00955394	13.71	14.57	9.76	8.67
ENSMUSG00000096740	Lbhd1	-0.64262	0.0122688	8.08	9.81	5.19	6.47
ENSMUSG00000021486	Prelid1	-0.641885	2.53034e-11	100.57	96.5	63.83	64.65
ENSMUSG00000107283	Mpv17	-0.639096	0.00314983	23.15	25.99	15.53	15.05
ENSMUSG00000026849	Tor1a	-0.638219	0.00654934	19.73	20.53	13	13.45
ENSMUSG00000033126	Ybey	-0.638194	0.266682	1.66	1.7	1.04	1.15
ENSMUSG00000073568	Arl14epl	-0.638036	1.25824e-08	60.89	62.2	40.36	40.19
ENSMUSG00000024266	Adad2	-0.637127	0.633956	1.79	1.63	1.11	1.13
ENSMUSG00000073434	Wdr90	-0.636198	0.00106582	5.73	5.59	3.62	3.77
ENSMUSG00000085525	Gm13166	-0.636169	0.712446	23.28	27.72	18.89	20.29
ENSMUSG00000048537	Phldb1	-0.635419	0.00491022	6.73	6.02	4.31	3.87
ENSMUSG00000027540	Ptpn1	-0.63457	0.000104725	11.48	11.82	7.54	7.7
ENSMUSG00000031546	Gins4	-0.634072	1.09634e-05	56.49	55.33	36.28	37.5
ENSMUSG00000057411	Antkmt	-0.634028	0.216716	14.03	13.83	10	10.19
ENSMUSG00000102476	Gm37245	-0.63384	0.689448	0.82	2.19	1.23	0.73
ENSMUSG00000038037	Socs1	-0.633667	0.5919	1.66	1.21	1.12	0.75
ENSMUSG00000042097	Zfp239	-0.633348	0.1632	3.51	3.55	2.42	2.2
ENSMUSG00000031425	Plp1	-0.633286	0.503821	1.21	1.73	1.04	0.97
ENSMUSG00000034445	Cyb561a3	-0.633049	0.0132598	9.32	8.09	5.81	5.74
ENSMUSG00000110620	Gm45733	-0.633028	0.784727	9.05	11.07	3.74	10.85
ENSMUSG00000039887	Alg14	-0.632808	0.387521	3.54	3.67	2.92	2.42
ENSMUSG00000033255	Gm5134	-0.632737	0.436875	1.91	1.85	1.22	1.24
ENSMUSG00000025156	Gps1	-0.632575	3.7201e-10	127.15	130.37	81.03	86.5
ENSMUSG00000004054	Map3k11	-0.632523	0.0010962	9.89	9	6.43	5.95
ENSMUSG00000018774	Cd68	-0.632151	0.0397474	17.44	16.73	10.38	12.13
ENSMUSG00000086591	Dnah2os	-0.631511	0.649014	4.04	5.19	2.66	3.48
ENSMUSG00000033467	Crlf2	-0.631393	0.148445	13.71	9.38	8.1	7.2
ENSMUSG00000022361	Zhx1	-0.630726	0.133545	2.38	3.25	1.63	2.07
ENSMUSG00000096215	Smim22	-0.630186	0.788417	13.1	8.08	9.38	6.69
ENSMUSG00000002731	Prkra	-0.628566	0.130667	7.39	8.21	5.17	5.11
ENSMUSG00000071532	Gm10335	-0.628481	0.156979	44.85	48.82	35.25	29.48
ENSMUSG00000032497	Lrrfip2	-0.628261	0.000858555	20.97	18.17	13.15	14
ENSMUSG00000030610	Det1	-0.628234	0.0443281	8.03	8.11	5.76	4.78
ENSMUSG00000025494	Sigirr	-0.627576	0.0353649	11.94	10.65	7.2	7.73
ENSMUSG00000020305	Asb3	-0.626859	0.088773	5.39	6.58	4.37	4.11
ENSMUSG00000030738	Eif3c	-0.626202	1.83535e-12	167.71	178.04	114.91	112.61
ENSMUSG00000027341	Tmem230	-0.626095	0.0184313	12.62	13.86	8.6	8.39
ENSMUSG00000032726	Bmp8a	-0.625826	0.65593	1.27	1.89	1.21	0.9
ENSMUSG00000052724	Gm9888	-0.625142	0.845473	4.45	0.74	2.35	1.18
ENSMUSG00000095339	Zscan4b	-0.624801	0.765428	0.92	1.56	0.88	0.78
ENSMUSG00000031352	Hccs	-0.624478	0.00933314	10.6	11.04	6.85	7.29
ENSMUSG00000029613	Eif2ak1	-0.624438	2.95555e-06	20.48	21.01	12.95	14.37
ENSMUSG00000025235	Bbs4	-0.624093	0.128442	4.58	5.55	3.47	3.2
ENSMUSG00000090935	Synj2bp	-0.62405	0.00829651	8.28	9.04	4.6	6.49
ENSMUSG00000025839	Pramel7	-0.624049	0.194705	5.2	6.23	3.7	3.85
ENSMUSG00000048865	Arhgap30	-0.623518	0.1072	3.34	2.75	1.81	2.21
ENSMUSG00000021147	Wdr37	-0.622398	0.00161224	8.35	9.97	6.09	6.14
ENSMUSG00000027582	Zgpat	-0.622385	0.00378445	20.88	16.92	11.84	13.24
ENSMUSG00000041187	Prkd2	-0.622014	0.234474	3.39	2.44	2.02	1.9
ENSMUSG00000063801	Ap3s2	-0.621349	2.58481e-07	17.99	17.39	11.76	11.55
ENSMUSG00000040356	Skiv2l	-0.621037	3.52939e-05	18.03	15.89	11.05	11.35
ENSMUSG00000028890	Mtf1	-0.620542	0.00125848	4.59	4.71	2.95	3.19
ENSMUSG00000001569	Nom1	-0.619055	1.95439e-05	6.95	6.76	4.41	4.63
ENSMUSG00000063802	Hspbp1	-0.618611	0.000476558	39.37	32.99	24.19	24.01
ENSMUSG00000051243	Islr2	-0.618127	0.135768	3.61	3.38	2.77	1.88
ENSMUSG00000085773	Gm16233	-0.61678	0.636571	3.66	3.46	2.53	2.23
ENSMUSG00000027551	Zfp64	-0.616734	5.2436e-05	27.2	27.48	18.18	16.33
ENSMUSG00000003526	Prodh	-0.616589	0.0939033	6.3	6.92	3.95	4.92
ENSMUSG00000037646	Vps13b	-0.615505	0.000122003	4.91	5.87	3.72	3.39
ENSMUSG00000030330	Ing4	-0.614755	0.00398847	21.02	20.13	13.66	14.33
ENSMUSG00000027466	Rbck1	-0.61346	1.51283e-05	33.17	31.86	22.83	21.37
ENSMUSG00000027613	Eif6	-0.612713	2.72898e-06	134.65	111.86	80.17	84.98
ENSMUSG00000025354	Dnajc14	-0.612532	0.00032409	22.29	18.01	13.47	12.96
ENSMUSG00000028416	Bag1	-0.612504	6.86143e-05	85.77	70.12	51.91	52.57
ENSMUSG00000035139	Secisbp2	-0.611583	0.000865476	13.42	12.03	8.62	8.41
ENSMUSG00000015668	Pdzd11	-0.610986	0.0419887	18.45	17.89	12.4	11.37
ENSMUSG00000015134	Aldh1a3	-0.610936	0.669444	2.97	1.54	1.79	0.95
ENSMUSG00000032870	Smap2	-0.610211	0.00213472	12.78	12.3	8.83	7.86
ENSMUSG00000022199	Slc22a17	-0.609563	0.0628912	13.29	9.35	8.68	6.47
ENSMUSG00000004771	Rab11a	-0.608704	0.0017656	30.46	29.82	17.05	18.09
ENSMUSG00000074211	Sdhaf1	-0.608555	0.229223	4.57	3.94	2.45	3.29
ENSMUSG00000026694	Eef1aknmt	-0.60737	0.0245607	5.18	4.45	3.06	3.37
ENSMUSG00000028668	Eloa	-0.606748	0.000771288	8.57	9.19	5.9	5.92
ENSMUSG00000024871	Doc2g	-0.606422	0.723598	2.76	1.51	1.68	1.24
ENSMUSG00000019578	Ubxn6	-0.605577	0.00206985	13.26	12.02	8.18	8.73
ENSMUSG00000048440	Cyp4f16	-0.604691	0.0235889	10.22	10.31	7.31	6.39
ENSMUSG00000031198	Fundc2	-0.604299	0.022264	8.54	9.88	6.09	6.22
ENSMUSG00000039033	Tasp1	-0.604221	0.198849	5.09	4.37	3.16	3.19
ENSMUSG00000027404	Snrpb	-0.603744	4.95452e-07	213.61	185.57	131.22	138.6
ENSMUSG00000058192	Zfp846	-0.603722	0.342863	1.93	3.4	2.22	1.67
ENSMUSG00000028455	Stoml2	-0.603567	3.22462e-08	87.81	85.11	57.5	58.55
ENSMUSG00000029701	Rbm28	-0.603498	3.08352e-08	33.72	33.02	22.68	21.87
ENSMUSG00000031785	Adgrg1	-0.601876	0.48911	1.54	1.36	0.89	1.07
ENSMUSG00000055900	Tmem69	-0.601276	0.184216	7.99	11.28	6.55	6.85
ENSMUSG00000053219	Raet1e	-0.600795	0.574244	3.11	3.82	2.36	2.22
ENSMUSG00000083621	Gm14586	-0.6006	0.601198	20.17	25.15	16.91	15.39
ENSMUSG00000086649	Gm15286	-0.60018	0.777611	3.65	5.83	3.02	3.55
ENSMUSG00000066798	Zbtb6	-0.599658	0.0550147	4.09	4.93	3.17	2.64
ENSMUSG00000030447	Cyfip1	-0.599488	8.5004e-07	34.96	39.72	23.71	25.49
ENSMUSG00000027889	Ampd2	-0.599337	3.12812e-05	19.56	18.47	12.83	12.53
ENSMUSG00000068327	Tlx2	-0.599016	0.733117	2.1	1.77	1.46	1.2
ENSMUSG00000018209	Stk4	-0.598944	2.29571e-06	21.16	23.85	14.7	15.32
ENSMUSG00000075040	Zfp408	-0.598668	0.00531073	9.57	8.31	5.99	5.97
ENSMUSG00000048410	Zfp407	-0.598449	0.00190548	4.63	4.69	3.3	2.93
ENSMUSG00000021916	Glt8d1	-0.597908	0.190226	6.98	9.2	5.13	5.44
ENSMUSG00000083716	Gm13436	-0.59788	0.83636	5.89	3.17	4.02	2.43
ENSMUSG00000031568	Rwdd4a	-0.597416	0.00493931	10.6	10.89	7.03	7.41
ENSMUSG00000074513	Arfip1	-0.597283	0.00673095	12.15	12.08	8.19	7.82
ENSMUSG00000046380	Jrk	-0.595914	0.32118	1.39	1.22	0.92	0.83
ENSMUSG00000027291	Vps39	-0.595584	0.00150716	9.34	10.79	6.86	6.64
ENSMUSG00000063480	Snu13	-0.595307	2.72322e-08	103.12	105.45	67.05	73.67
ENSMUSG00000015747	Vps45	-0.595088	0.0592475	6.76	6.41	4.34	4.54
ENSMUSG00000045251	Zfp688	-0.595033	0.436036	7.58	6.91	5.11	4.76
ENSMUSG00000079009	Gm14139	-0.594688	0.080386	10.51	14.19	7.63	9.05
ENSMUSG00000049401	Ogfr	-0.594391	0.00173718	17.78	16.13	11.87	10.99
ENSMUSG00000116461	Gm44502	-0.593709	0.213942	2.58	2.69	2.08	1.47
ENSMUSG00000028018	Gstcd	-0.592802	0.00550651	9.39	10.75	6.52	7.22
ENSMUSG00000026281	Dtymk	-0.591971	6.29354e-09	242.01	241.35	165.58	163.69
ENSMUSG00000072258	Taf1a	-0.591437	0.0521185	7.67	8.63	5.27	5.74
ENSMUSG00000007415	Gatad1	-0.591358	0.000364174	45.25	50.24	36.62	38.2
ENSMUSG00000040044	Orc3	-0.591241	0.000626437	23.51	26.87	16.15	17.88
ENSMUSG00000019143	Hars2	-0.590583	0.0156478	9.38	11.7	6.01	7.12
ENSMUSG00000020473	Aebp1	-0.588774	0.577783	1.41	1.03	0.86	0.85
ENSMUSG00000032534	Cep63	-0.588708	0.0527378	6.71	7.82	5.08	6.37
ENSMUSG00000023923	Tbc1d5	-0.587323	0.248292	1.75	1.67	1.11	1.22
ENSMUSG00000047193	Dync2h1	-0.587271	0.0568615	1.27	1.61	0.91	1.04
ENSMUSG00000038976	Ppp1r9b	-0.586808	0.000131684	24.82	20.72	15.95	14.96
ENSMUSG00000018217	Pmp22	-0.58553	0.77513	1.4	1.23	0.64	1.1
ENSMUSG00000047603	Zfp235	-0.584942	0.300553	2.42	2.62	1.69	1.71
ENSMUSG00000027131	Emc4	-0.584771	0.00336308	49.14	44.81	31.88	32.79
ENSMUSG00000047205	Dusp18	-0.584239	0.144902	2.68	2.7	1.72	1.92
ENSMUSG00000084166	Gm6451	-0.584166	0.793485	3.54	3.75	2.61	2.36
ENSMUSG00000019210	Atp6v1e1	-0.584102	1.34096e-05	74.42	75.26	49.15	53.12
ENSMUSG00000031537	Ikbkb	-0.584057	0.0099327	8.17	7.38	5.2	5.36
ENSMUSG00000004788	Eif2b2	-0.583502	0.000153194	45.48	42.1	28.77	30.99
ENSMUSG00000020788	Atp2a3	-0.583405	0.011113	5.88	5.79	3.87	4.03
ENSMUSG00000027411	Vps16	-0.581193	0.000211776	19.92	18.9	13.84	12.5
ENSMUSG00000031948	Kars	-0.58056	1.2342e-10	210.81	203.24	140.38	141.8
ENSMUSG00000029001	Fbxo44	-0.580372	0.548109	3.55	2.92	2.16	2.28
ENSMUSG00000014786	Slc9a5	-0.579303	0.334655	2.37	2.25	1.7	1.43
ENSMUSG00000097042	Gm17491	-0.579001	0.444268	2.64	3.08	1.78	2.11
ENSMUSG00000035069	Oma1	-0.578791	0.0973885	8.99	8.1	5.76	5.92
ENSMUSG00000090077	Lime1	-0.578743	0.104608	10.42	8.32	6.88	5.85
ENSMUSG00000028656	Cap1	-0.57863	2.50267e-08	79.87	85.54	55.57	55.96
ENSMUSG00000033543	Gtf2a2	-0.578547	0.0533201	28.99	37.35	20.32	25.54
ENSMUSG00000024854	Pold4	-0.578416	0.727552	3.97	3.6	2.77	3.36
ENSMUSG00000052928	Ctif	-0.578092	0.233558	1.62	1.6	1.09	1.11
ENSMUSG00000026035	Ppil3	-0.578054	0.0718445	24.21	21.64	14.39	16.6
ENSMUSG00000050619	Zscan29	-0.577605	0.189514	2.98	3.73	1.96	2.33
ENSMUSG00000036398	Ppp1r11	-0.576651	0.0228315	55.02	41.78	35.52	34.22
ENSMUSG00000030264	Thumpd3	-0.576632	0.000208702	35.34	39.67	23.83	27.4
ENSMUSG00000027447	Cst3	-0.57572	0.00109984	69.64	68.78	49.39	46.51
ENSMUSG00000021367	Edn1	-0.575565	0.612698	1.86	2.08	1.29	1.4
ENSMUSG00000025208	Mrpl43	-0.575197	0.000551853	43.92	40.67	28.75	29.4
ENSMUSG00000018171	Vmp1	-0.5747	2.48268e-05	28.37	28.85	19.6	19.45
ENSMUSG00000094786	Gm14403	-0.574442	0.565487	5.58	8.83	6.16	3.79
ENSMUSG00000091086	Rpl6l	-0.57423	0.71804	3.96	4.6	3.47	2.45
ENSMUSG00000078869	Gm14409	-0.574072	0.594785	4.44	5.99	3.91	3.34
ENSMUSG00000071266	Zfp946	-0.573531	0.503821	1.83	2.37	1.22	1.75
ENSMUSG00000020640	Itsn2	-0.572565	0.000959959	8.62	9.88	6.01	6.61
ENSMUSG00000050714	Zbtb26	-0.571121	0.149174	2.55	2.7	2.13	1.82
ENSMUSG00000024982	Zdhhc6	-0.570971	0.00246499	18.67	19.59	12.48	13.61
ENSMUSG00000021840	Mapk1ip1l	-0.570892	2.70525e-07	50.18	55.9	35.16	37.31
ENSMUSG00000040648	Ppip5k2	-0.570134	2.18967e-05	16.98	19.08	12.53	11.97
ENSMUSG00000001380	Hars	-0.569493	4.63618e-06	56.43	54.01	37.47	38.4
ENSMUSG00000031392	Irak1	-0.568903	0.00134966	13.74	12.22	8.84	9.06
ENSMUSG00000020476	Dbnl	-0.568793	3.2489e-06	66.18	59.06	42.82	43.74
ENSMUSG00000047904	Sstr2	-0.568601	0.748746	1.54	1.37	0.88	0.8
ENSMUSG00000020534	Shmt1	-0.568323	5.53041e-08	73.86	73.06	48.61	52.16
ENSMUSG00000030059	Tmf1	-0.568291	0.000632056	8.47	8.36	5.77	5.74
ENSMUSG00000071669	Snx29	-0.567817	0.359011	3.13	3.03	2.22	2.04
ENSMUSG00000025995	Wdr75	-0.567779	5.54516e-05	42.28	51.54	31.33	32.98
ENSMUSG00000022369	Mtbp	-0.567605	0.00498436	11.57	11.2	8.08	7.51
ENSMUSG00000024617	Camk2a	-0.567121	0.444014	1.49	1.56	1.34	0.77
ENSMUSG00000078570	1110065P20Rik	-0.567091	0.404429	18.43	12.24	10.88	10.11
ENSMUSG00000117333	Gm16386	-0.562755	0.813666	1.16	2.06	0.61	1.63
ENSMUSG00000032309	Fbxo22	-0.562515	3.51955e-06	55.05	55.11	37.35	38.62
ENSMUSG00000073838	Tufm	-0.560959	8.06592e-08	133.6	141.25	97.43	92.44
ENSMUSG00000001062	Vps9d1	-0.560652	0.286975	3.31	3.38	2.27	2.36
ENSMUSG00000001082	Mfsd10	-0.560469	8.1584e-05	43.54	40.97	29.01	30.08
ENSMUSG00000001847	Rac1	-0.560315	3.2759e-05	40.11	45.99	27.87	27.91
ENSMUSG00000045268	Zfp691	-0.559416	0.599312	2.8	2.83	2.18	1.57
ENSMUSG00000035325	Sec31a	-0.558099	1.72621e-07	55.7	61.37	40.33	40.4
ENSMUSG00000059555	Tor4a	-0.558073	0.223087	3.52	3.41	2.53	2.24
ENSMUSG00000040365	Trim41	-0.557644	4.27882e-05	39.9	33.07	25	25.38
ENSMUSG00000018167	Stard3	-0.55722	0.0105419	16.9	15.49	11.53	10.9
ENSMUSG00000030534	Vps33b	-0.556347	0.00578966	15.54	13.88	10.25	10.12
ENSMUSG00000047766	Lrrc49	-0.556229	0.271764	3.55	3.45	2.39	2.46
ENSMUSG00000052155	Acvr2a	-0.555699	0.233596	1.95	2.56	1.39	1.73
ENSMUSG00000029404	Arl6ip4	-0.555413	0.00956525	45.54	36.78	27.85	30.11
ENSMUSG00000034271	Jdp2	-0.55486	0.651931	2.95	2.23	1.9	1.68
ENSMUSG00000118029	Gm55328	-0.554767	0.688676	1.76	1.75	0.98	1.48
ENSMUSG00000080902	Ywhaq-ps3	-0.553969	0.845473	2	4.37	2.42	2.1
ENSMUSG00000018322	Tomm34	-0.553669	6.67649e-05	43.78	42.86	28.79	31
ENSMUSG00000108037	Gm44597	-0.553563	0.583294	1.49	2.16	1.62	0.9
ENSMUSG00000034111	Tmed8	-0.552601	0.00953377	4.27	4.81	3.07	3.2
ENSMUSG00000027935	Rab13	-0.552266	0.626151	4.81	4.04	3.1	3.22
ENSMUSG00000026784	Pdss1	-0.552109	0.0672557	12.65	15.28	9.5	9.88
ENSMUSG00000083396	Gm15542	-0.552064	0.271225	14.04	14.2	12.36	7.33
ENSMUSG00000074238	Ap1ar	-0.551264	0.00100428	19.91	21.75	14.74	14.09
ENSMUSG00000038696	Mapkap1	-0.551082	0.0116523	12.41	12.41	8.57	7.15
ENSMUSG00000060802	B2m	-0.55092	0.114731	23.45	26.41	16.21	18.94
ENSMUSG00000036086	Zranb3	-0.550847	0.000858555	12.21	12.81	8.85	8.46
ENSMUSG00000042312	S100a13	-0.550615	0.457216	13.99	12.8	8.81	10.29
ENSMUSG00000038151	Prdm1	-0.550292	0.343643	1.76	2.37	1.34	1.46
ENSMUSG00000047731	Wbp1l	-0.550001	0.000116063	19.98	18.36	13.38	13.22
ENSMUSG00000025485	Ric8a	-0.547457	0.00318775	13.24	12.27	9.24	8.48
ENSMUSG00000072893	4933439C10Rik	-0.547046	0.555976	3.02	1.84	1.47	1.97
ENSMUSG00000006058	Snf8	-0.546799	0.00106903	100.26	87.71	61.4	71.12
ENSMUSG00000051550	Zfp579	-0.546769	0.622872	3.07	1.57	1.81	1.47
ENSMUSG00000029480	Dhx37	-0.54671	8.66614e-06	22.24	21.58	15.09	15.35
ENSMUSG00000028798	Eif3i	-0.546649	6.49499e-08	228.26	242.23	165.09	165.32
ENSMUSG00000078656	Vps25	-0.546388	2.57092e-05	105.1	108.11	73.67	78.79
ENSMUSG00000079297	Gm2223	-0.545714	0.784468	1.62	2.16	1.2	1.5
ENSMUSG00000078546	Zfp995	-0.545195	0.509376	2.77	4.15	2.38	2.5
ENSMUSG00000022221	Ripk3	-0.545064	0.0064041	19.96	20.89	14.47	14.03
ENSMUSG00000040621	Gemin8	-0.544816	0.418837	7.49	6.05	5.28	3.48
ENSMUSG00000036537	Rnf113a1	-0.544585	0.572516	5.23	4.71	3.16	3.86
ENSMUSG00000118140	Gm4949	-0.544246	0.834514	1.88	1.97	1.78	0.9
ENSMUSG00000037262	Kin	-0.544218	0.1632	10.61	11.08	6.93	8.3
ENSMUSG00000068479	Mfap1a	-0.544076	0.000879235	12.54	12.9	8.68	9.04
ENSMUSG00000111291	Gm48604	-0.543768	0.523609	2.75	2.28	1.72	1.8
ENSMUSG00000056300	Zfp981	-0.543374	0.00173951	35.89	46.65	26.48	31.43
ENSMUSG00000090733	Rps27	-0.543215	1.27141e-06	2814.3	3217.85	2293.21	2485.35
ENSMUSG00000031309	Rps6ka3	-0.542267	0.024556	4.01	4.66	3.47	3.01
ENSMUSG00000047654	Tssk6	-0.542221	0.756311	2.61	2.02	1.35	1.95
ENSMUSG00000048528	Nkx1-2	-0.542018	0.050266	6.6	7.15	4.93	4.66
ENSMUSG00000071180	Smim15	-0.541917	0.0171008	24.26	26.74	18.47	18
ENSMUSG00000086228	Ubap1l	-0.541844	0.812234	1.81	1.38	1.29	0.95
ENSMUSG00000038764	Ptpn3	-0.541718	0.0338203	3.64	3.83	2.58	2.62
ENSMUSG00000042178	Armc5	-0.541687	0.0762001	5.24	4.73	3.53	3.43
ENSMUSG00000021681	Aggf1	-0.541317	1.67766e-05	31.03	31.48	21.59	22.05
ENSMUSG00000098923	Tmem185b	-0.540413	0.165802	5.04	5.24	3.86	3.31
ENSMUSG00000110489	Gm31659	-0.540299	0.721103	13.26	10.67	10.61	7.11
ENSMUSG00000032867	Fbxw8	-0.539924	0.000264187	13.68	13.07	9.6	9.06
ENSMUSG00000086147	Zfp989	-0.539886	0.0160084	16.07	20.63	12.94	12.71
ENSMUSG00000024983	Vti1a	-0.539498	0.350962	4.5	3.42	2.78	2.39
ENSMUSG00000087523	Gm12319	-0.538516	0.796506	4.97	4.6	2.45	2.93
ENSMUSG00000012429	Mplkip	-0.538105	0.0732877	10.67	9.78	5.8	9.16
ENSMUSG00000019715	Gle1	-0.537449	0.000188253	17.58	17.31	12.02	12.38
ENSMUSG00000023009	Nckap5l	-0.536651	0.117985	4.56	3.42	2.92	2.66
ENSMUSG00000025006	Sorbs1	-0.535788	0.417914	2.89	2.66	1.9	2
ENSMUSG00000035171	1110059E24Rik	-0.535345	0.0290099	18.56	22.34	13.75	14.84
ENSMUSG00000087368	BC065397	-0.535153	0.681734	1.65	1.7	0.71	0.94
ENSMUSG00000020448	Rnf185	-0.53482	0.000808215	20.94	21.79	14.56	15.4
ENSMUSG00000034220	Gpc1	-0.533845	0.063337	5.47	4.8	3.73	3.48
ENSMUSG00000071647	Eml3	-0.53381	0.00614891	12.5	12.53	9.3	8.35
ENSMUSG00000117486	Gm30938	-0.533706	0.473614	5.14	4.9	3.32	3.5
ENSMUSG00000038712	Mindy1	-0.533308	0.00047502	28.68	27.3	18.34	19.61
ENSMUSG00000036915	Kirrel2	-0.533133	0.091653	7.57	5.74	4.55	4.81
ENSMUSG00000054999	Naaladl1	-0.533124	0.687238	1.62	1.33	1.02	1.07
ENSMUSG00000045763	Basp1	-0.532838	0.00581076	35.63	28.26	23.1	21.98
ENSMUSG00000022711	Pmm2	-0.532729	0.1072	12.39	10.3	7.47	8.59
ENSMUSG00000022101	Fgf17	-0.532591	0.1796	11.57	11.63	9.47	6.83
ENSMUSG00000047045	Tmem164	-0.532274	0.0320355	5.97	5.79	3.89	4.29
ENSMUSG00000020549	Elac2	-0.53177	1.47525e-05	40.63	42.89	29.85	28.88
ENSMUSG00000020718	Polg2	-0.531591	0.439885	5.61	5.2	3.72	3.94
ENSMUSG00000050122	Vwa3b	-0.531204	0.12929	3.32	3.84	2.41	2.6
ENSMUSG00000111133	Gm5831	-0.531013	0.710679	2.59	4.75	2.51	2.71
ENSMUSG00000026553	Copa	-0.530879	1.56099e-06	57.06	64.41	43.01	41.74
ENSMUSG00000075467	Dnlz	-0.530554	0.279366	6.27	3.98	3.69	3.54
ENSMUSG00000018727	Cpsf4l	-0.530375	0.343161	8.42	7.91	5.7	5.97
ENSMUSG00000069539	Scyl2	-0.529901	0.00410981	9.66	10.74	7.25	6.94
ENSMUSG00000031431	Tsc22d3	-0.529672	0.809495	1.08	1.37	0.83	0.91
ENSMUSG00000043065	Spice1	-0.528546	0.00566685	8.57	9.28	6.42	6.12
ENSMUSG00000106037	Gm4332	-0.527958	0.769897	26.43	22.06	18.75	21.13
ENSMUSG00000008859	Rala	-0.52782	0.00592621	15.71	17.56	11.34	12.13
ENSMUSG00000005804	Bloc1s6	-0.527316	0.0725111	5.74	6.23	4.32	4.11
ENSMUSG00000019054	Fis1	-0.52724	0.00699015	72.2	65.83	47.38	50.88
ENSMUSG00000061755	Bod1l	-0.526778	5.6675e-05	12.13	14.01	9.11	9.28
ENSMUSG00000038894	Irs2	-0.526652	0.0410818	4.18	3.71	2.67	2.89
ENSMUSG00000020427	Igfbp3	-0.526184	0.286379	4.55	4.72	3.2	3.28
ENSMUSG00000025245	Lztfl1	-0.524717	0.292716	2.91	4.3	2.25	2.84
ENSMUSG00000038685	Rtel1	-0.524393	2.01149e-05	25.49	24.98	17.43	18.19
ENSMUSG00000029699	Ssc4d	-0.520785	0.204059	11.44	9.52	7.93	9
ENSMUSG00000049090	Zadh2	-0.520395	0.454294	2.3	2.05	1.46	1.62
ENSMUSG00000052299	Ltn1	-0.52034	0.00130406	12.17	16.77	9.58	9.9
ENSMUSG00000027574	Nkain4	-0.52026	0.788417	2.92	4.28	2.64	2.5
ENSMUSG00000078503	Zfp990	-0.519414	0.00632121	22.91	30.48	18.34	19.5
ENSMUSG00000037221	Mospd3	-0.519004	0.088773	19.13	16.56	12.84	12.71
ENSMUSG00000021149	Gtpbp4	-0.518796	5.89664e-06	21.3	23.65	16.15	15.62
ENSMUSG00000022223	Sdr39u1	-0.518794	0.252214	12.12	11.65	7.51	9.55
ENSMUSG00000025723	Nmb	-0.518279	0.577133	11.3	11.45	7.66	8.92
ENSMUSG00000049600	Zbtb45	-0.518194	0.00815276	16.36	15.66	11.51	11.02
ENSMUSG00000086877	A230072C01Rik	-0.517527	0.800123	1.6	1.85	1.63	0.77
ENSMUSG00000027247	Arhgap1	-0.516976	0.00018041	30.37	32.01	21.27	23.13
ENSMUSG00000038521	C1s1	-0.5168	0.277706	3.9	4.09	2.74	2.96
ENSMUSG00000059897	Zfp930	-0.516098	0.148881	6.19	8.33	4.8	5.2
ENSMUSG00000022554	Hgh1	-0.515878	0.0722981	12.5	11.12	8.27	8.59
ENSMUSG00000000976	Heatr6	-0.515426	0.00101088	10.37	10.15	7.28	7.27
ENSMUSG00000079008	Gm14124	-0.515368	0.0722981	7.92	9.72	5.8	6.75
ENSMUSG00000022610	Mapk12	-0.515241	0.774723	1.85	1.69	1.7	0.81
ENSMUSG00000081111	Gm5913	-0.514928	0.742287	2.84	2.16	1.66	1.96
ENSMUSG00000041859	Mcm3	-0.514842	1.06101e-08	160.12	158.67	111.11	115.63
ENSMUSG00000025474	Tubgcp2	-0.514811	0.00286518	20.1	21.22	15.88	13.46
ENSMUSG00000026427	Eif2d	-0.514535	1.57563e-05	63.82	62.91	46.3	44.48
ENSMUSG00000065990	Aurkaip1	-0.514182	0.00155525	88.56	78.67	55.79	57.46
ENSMUSG00000003812	Dnase2a	-0.513473	0.0793816	13.32	14.37	9.85	9.28
ENSMUSG00000075273	Ttc30b	-0.512417	0.678114	1.43	1.85	0.94	1.4
ENSMUSG00000067722	BC003965	-0.512306	0.0567603	10.1	8.72	7.35	6.05
ENSMUSG00000071362	Gm10330	-0.51154	0.83658	1.76	4.92	2.57	2.17
ENSMUSG00000027353	Mcm8	-0.511272	0.0257373	9.44	10.59	7.13	7.17
ENSMUSG00000035578	Iqcg	-0.511252	0.0334403	5.1	5.1	3.87	3.38
ENSMUSG00000035521	Gnptg	-0.510695	0.112143	16.03	15.47	11.7	10.34
ENSMUSG00000098789	Jmjd7	-0.510648	0.152016	14.88	14.37	11.64	9.36
ENSMUSG00000030979	Uros	-0.510489	0.223505	10.36	10.55	6.77	7.59
ENSMUSG00000069208	Zfp825	-0.510479	0.527167	5.53	6.42	3.26	5.5
ENSMUSG00000047824	Pygo2	-0.510348	0.000894371	27.49	24.4	19.33	17.53
ENSMUSG00000004100	Ppan	-0.509418	0.000138061	109.46	91.76	71.66	72.76
ENSMUSG00000037361	Sf3b6	-0.508965	0.0169916	33.69	37.22	24.52	26.56
ENSMUSG00000029221	Slc30a9	-0.5089	0.0123966	6.18	6.47	4.58	4.43
ENSMUSG00000106237	Gm8066	-0.508609	0.733117	17.7	11.03	10.7	11.36
ENSMUSG00000035121	Neil2	-0.50747	0.463586	4.25	4.06	2.99	2.97
ENSMUSG00000041974	Spidr	-0.506577	0.0228315	10.91	13.24	8.92	8.34
ENSMUSG00000028128	F3	-0.505897	0.65505	2.35	2.65	1.79	1.79
ENSMUSG00000034777	Vax2	-0.505677	0.843885	1.46	1.84	1.15	1.22
ENSMUSG00000029544	Cabp1	-0.505669	0.424275	13.78	10.21	6.49	11.17
ENSMUSG00000093908	Gm5784	-0.505312	0.690695	1.84	1.83	1.38	1.24
ENSMUSG00000060149	BC002059	-0.505031	0.312379	5.99	8.16	4.45	5.71
ENSMUSG00000034190	Chmp7	-0.505024	0.00383258	23.72	21.72	17.48	15.06
ENSMUSG00000034449	Dhrs11	-0.503592	0.376175	9.47	8.35	6.32	6.59
ENSMUSG00000031074	Fgf3	-0.503363	0.622551	2.53	2.14	1.52	1.85
ENSMUSG00000035790	Cep19	-0.503254	0.171441	10.79	12.43	7.32	7.8
ENSMUSG00000004221	Ikbkg	-0.502288	0.0674698	4.98	5.29	3.74	3.89
ENSMUSG00000021803	Cdhr1	-0.502054	0.572516	1.29	1.43	0.94	1.02
ENSMUSG00000022248	Rad1	-0.501314	0.0377856	20.02	21.19	14.84	14.41
ENSMUSG00000034673	Pbx2	-0.50121	0.00206985	22.99	24.57	16.13	17.63
ENSMUSG00000031879	Ciao2b	-0.501146	0.0370532	49.83	42.29	33.2	34.33
ENSMUSG00000030269	Mtmr14	-0.501109	0.00326283	19.97	19.6	13.85	14.6
ENSMUSG00000000120	Ngfr	-0.499434	0.000113714	32.03	29.94	21.63	22.91
ENSMUSG00000045045	Lrfn4	-0.498695	0.113957	10.55	7.48	6.56	6.54
ENSMUSG00000022890	Atp5j	-0.498602	0.000379403	189.84	171.65	131.58	135.08
ENSMUSG00000027552	E2f5	-0.498308	0.230548	8.36	10.63	6.41	7.28
ENSMUSG00000001445	Mrpl10	-0.497791	6.67649e-05	71.61	75.88	54.26	52.09
ENSMUSG00000047539	Fbxo28	-0.496121	0.0148076	7.46	7.92	5.36	5.7
ENSMUSG00000023979	Guca1b	-0.496041	0.814986	1.28	1.61	1.18	0.9
ENSMUSG00000025383	Il23a	-0.495824	0.803588	1.68	2.29	1.55	1.32
ENSMUSG00000032271	Nnmt	-0.49575	0.86838	2.14	1.37	1.22	1.4
ENSMUSG00000028430	Nol6	-0.495362	1.56099e-06	54.76	50.58	37.57	38.25
ENSMUSG00000024429	Gnl1	-0.495305	0.0010962	42.38	34.38	27.69	27.72
ENSMUSG00000043019	Edem3	-0.495196	0.0140098	7.96	10.08	6.62	6.55
ENSMUSG00000047090	Tmem198b	-0.49494	0.272229	5.91	5.52	3.89	4.41
ENSMUSG00000002741	Ykt6	-0.494094	8.83027e-05	56.5	50.29	38.19	38.98
ENSMUSG00000034255	Arhgap27	-0.493777	0.162549	5.19	5.09	3.71	3.13
ENSMUSG00000033009	Ogfod1	-0.492788	0.00275722	10.41	11.16	7.69	7.85
ENSMUSG00000030019	Fbxl14	-0.49214	0.00584117	21.95	18.33	14.68	14.44
ENSMUSG00000022035	Ccdc25	-0.491876	0.00429738	23.88	25.23	17.34	18.2
ENSMUSG00000031834	Pik3r2	-0.490746	0.00285109	18.71	17.87	13.65	12.79
ENSMUSG00000066009	Zfp987	-0.490585	0.0194309	24.14	32.95	19.31	21.99
ENSMUSG00000087396	4933407K13Rik	-0.490532	0.51881	2.06	1.98	1.35	1.61
ENSMUSG00000078905	Gm14393	-0.489794	0.810803	5.48	6.92	3.65	5.76
ENSMUSG00000040811	Eml2	-0.489562	0.0143126	26.34	21.12	16.83	17.24
ENSMUSG00000082035	Rpl17-ps8	-0.489377	0.621644	13.9	13.43	11.21	9.17
ENSMUSG00000005846	Rsl1d1	-0.48934	2.03365e-05	132.71	151.06	99.85	106.12
ENSMUSG00000116679	Gm49739	-0.488717	0.747296	107.77	191.2	131.54	202.85
ENSMUSG00000040843	Tiprl	-0.488297	0.0142632	9.04	9.49	6.41	7
ENSMUSG00000053565	Eif3k	-0.487937	9.47164e-07	422.75	440.81	317.41	319.66
ENSMUSG00000041143	Tmco4	-0.487858	0.580275	2.11	2.03	1.39	1.64
ENSMUSG00000073468	Sft2d1	-0.487804	0.127411	27.51	25.11	17.13	21.63
ENSMUSG00000078995	Zfp456	-0.486724	0.672778	0.98	1.45	1.01	0.75
ENSMUSG00000028869	Gnl2	-0.485898	0.000319856	41.4	44.17	30.3	31.88
ENSMUSG00000054708	Ankrd24	-0.485555	0.425234	3.09	3.28	2.82	1.8
ENSMUSG00000029610	Aimp2	-0.485323	0.0053662	50.95	54.04	39.47	37.02
ENSMUSG00000009640	Dmap1	-0.485228	0.0591747	26.96	21.07	17.79	17.33
ENSMUSG00000021666	Gfm2	-0.485117	0.00206079	22.25	23.48	17.53	15.48
ENSMUSG00000050029	Rap2c	-0.48432	0.0896869	6.8	7.93	5.7	4.97
ENSMUSG00000032288	Imp3	-0.484079	0.0143126	52.95	56.55	39.91	40.76
ENSMUSG00000120224	2810001A02Rik	-0.483532	0.634788	12.72	10.66	8.2	9.35
ENSMUSG00000012123	Crybg2	-0.482971	0.283358	3.47	2.66	2.44	2.05
ENSMUSG00000041625	Ggact	-0.482965	0.645463	6.4	5.12	4.74	4.26
ENSMUSG00000002059	Rab34	-0.48296	0.042494	22.86	22.62	16.55	17.05
ENSMUSG00000039195	Bbln	-0.48269	0.346596	24.01	22.73	15.97	19.41
ENSMUSG00000038545	Cul7	-0.48233	5.83622e-05	22.95	21.69	16.39	16.02
ENSMUSG00000040270	Bach2	-0.482248	0.304041	1.55	1.25	1.17	1.08
ENSMUSG00000061111	Mcrip1	-0.48117	0.116964	24.79	20.57	17.06	16.32
ENSMUSG00000030587	2200002D01Rik	-0.479575	0.814986	2.36	1.48	1.58	1.23
ENSMUSG00000033735	Spr	-0.479219	0.00493931	71.59	61.33	48.66	48.28
ENSMUSG00000121247	ENSMUSG00000121247	-0.479078	0.697615	4.75	2.43	2.65	2.64
ENSMUSG00000034730	Adgrb1	-0.478923	0.386065	3.33	2.41	2.09	2.54
ENSMUSG00000040525	Cblc	-0.478208	0.594785	4.74	3.63	3.12	3
ENSMUSG00000037119	Fam91a1	-0.478178	0.00629254	18.53	23.71	14.34	16.42
ENSMUSG00000029176	Anapc4	-0.476906	0.00205445	17.55	19.01	13.07	13.6
ENSMUSG00000041130	Zfp598	-0.47672	0.000326692	47.62	40.44	32.92	31.47
ENSMUSG00000030717	Nupr1	-0.476435	0.278852	27.71	24.77	22.42	16.54
ENSMUSG00000029642	Polr1d	-0.475123	0.000740315	102.91	93.57	71.36	73.81
ENSMUSG00000051864	Tbc1d22a	-0.475076	0.0726905	8.66	8.01	5.78	6.43
ENSMUSG00000029557	Mrm2	-0.474903	0.18992	17.08	13.53	10.8	11.8
ENSMUSG00000034450	Gulo	-0.474364	0.601198	3.15	2.54	2.14	2.04
ENSMUSG00000024766	Lipo3	-0.474282	0.65852	1.83	1.76	1.39	1.27
ENSMUSG00000021737	Psmd6	-0.473437	0.000337963	82.27	88.13	60.92	64.59
ENSMUSG00000020935	Dcakd	-0.473246	2.31022e-05	118.32	110.3	85	83.06
ENSMUSG00000028699	Tspan1	-0.47303	0.801043	1.88	1.37	0.81	1.6
ENSMUSG00000035382	Pcsk7	-0.471797	0.208064	5.22	4.77	3.14	4.17
ENSMUSG00000083534	H2-M6-ps	-0.471351	0.234385	30.01	21.35	20.55	17.67
ENSMUSG00000090363	Gm3512	-0.471308	0.727677	1.99	2.56	1.57	1.78
ENSMUSG00000035781	R3hdm4	-0.471036	0.0596198	18.39	16.6	12.05	13.77
ENSMUSG00000078868	Gm14412	-0.470268	0.357695	8.95	14.21	8.05	8.96
ENSMUSG00000035575	Utp6	-0.469888	8.82123e-06	64.71	68.92	48.13	49.62
ENSMUSG00000078864	Gm14322	-0.469671	0.710236	4.79	5.98	4.99	3.02
ENSMUSG00000066894	Vsig10	-0.468635	0.346257	3.01	2.9	1.91	2.43
ENSMUSG00000021139	Gm20498	-0.468555	0.565167	7.84	7.02	6.72	4.58
ENSMUSG00000002608	Ccdc97	-0.467856	0.010489	16.38	15.62	11.44	12.09
ENSMUSG00000023170	Gps2	-0.46781	0.0392556	31.87	32.09	24.1	23.31
ENSMUSG00000047036	Zfp445	-0.465979	0.000296978	21.2	23.88	16.13	16.16
ENSMUSG00000032570	Atp2c1	-0.465875	0.00210924	20.43	22.37	16.17	16.1
ENSMUSG00000038572	Bpifb5	-0.465415	0.789993	1.86	1.9	1.5	1.28
ENSMUSG00000058594	Fbh1	-0.465166	0.00410981	16.57	16.84	12.46	12.11
ENSMUSG00000024180	Pgap6	-0.46504	0.000384466	30.32	30.44	22.76	23.14
ENSMUSG00000045273	Cenph	-0.464947	0.01586	39.96	41.19	29	31.25
ENSMUSG00000028898	Trnau1ap	-0.464874	0.121801	23.99	23.04	17.99	16.87
ENSMUSG00000017307	Acot8	-0.464644	0.273972	20.25	15.45	14.04	12.61
ENSMUSG00000050106	Tmc8	-0.464465	0.225527	7.15	6.07	4.83	4.88
ENSMUSG00000033075	Senp1	-0.464222	0.00117708	15.84	17.52	11.66	11.76
ENSMUSG00000002395	Use1	-0.464129	0.0213489	73.64	63.35	47.88	52.76
ENSMUSG00000017493	Igfbp4	-0.463627	0.330496	4.38	3.22	2.28	2.64
ENSMUSG00000005510	Ndufs3	-0.463541	0.0191255	56.08	50.32	39.1	40.33
ENSMUSG00000031304	Il2rg	-0.463245	0.764292	2.34	2.01	1.53	1.69
ENSMUSG00000013698	Pea15a	-0.463038	0.385013	5.08	4.86	4.14	3.17
ENSMUSG00000041716	Gm20604	-0.461546	0.120501	8.27	8.95	5.99	6.75
ENSMUSG00000022407	Adsl	-0.461397	0.000542824	54.01	52.95	41.21	37.31
ENSMUSG00000022760	Thap7	-0.460612	0.528201	11.14	7.45	7.62	7.18
ENSMUSG00000045010	Gm4779	-0.459209	0.585681	4.22	3.47	3.67	2.54
ENSMUSG00000113204	Gm46430	-0.458412	0.0253686	17.79	19.49	13.2	15.5
ENSMUSG00000111529	Gm48141	-0.458265	0.86838	2.83	3.91	2.27	2.8
ENSMUSG00000030792	Dkkl1	-0.457629	0.8505	3.12	2.79	2.57	1.55
ENSMUSG00000019796	Lrp11	-0.456428	0.0352179	11.89	12.15	8.18	9.62
ENSMUSG00000030339	Ltbr	-0.45616	0.798227	1.63	1.47	1.48	0.82
ENSMUSG00000074269	Rec114	-0.456124	0.337598	21.42	18.25	15.25	14.73
ENSMUSG00000022427	Tomm22	-0.456073	0.00253767	56.05	60	48.2	41.41
ENSMUSG00000025645	Ccdc51	-0.455769	0.555976	8.45	5.65	4.52	6.06
ENSMUSG00000100691	2010320M18Rik	-0.455389	0.788417	3.51	3.18	2.54	2.48
ENSMUSG00000052180	Serpinb6c	-0.455146	0.390864	9.3	10.2	7.44	7.09
ENSMUSG00000120276	ENSMUSG00000120276	-0.454897	0.861624	1.17	1.42	1.11	0.82
ENSMUSG00000062518	Zfp534	-0.454862	0.0180767	32.97	44.67	27.65	29.93
ENSMUSG00000026134	Prim2	-0.454802	0.0188937	22.85	23.55	17.34	17.14
ENSMUSG00000028830	AU040320	-0.453901	0.256471	3.84	3.38	2.68	2.66
ENSMUSG00000033669	Zfp7	-0.453824	0.0013821	34.87	32.38	23.59	26.07
ENSMUSG00000001348	Acp5	-0.453657	0.500793	7.34	7.39	5.08	6.09
ENSMUSG00000052707	Tnrc6a	-0.453535	0.00053338	14.43	14.95	10.32	11.43
ENSMUSG00000032606	Nicn1	-0.453183	0.152741	10.25	10.09	7.65	7.48
ENSMUSG00000032952	Ap4b1	-0.452914	0.118327	8.61	8.66	6.29	6.58
ENSMUSG00000024082	Ndufaf7	-0.452606	0.114181	15.9	14.57	11.74	10.85
ENSMUSG00000029048	Rer1	-0.452384	0.00329445	48.02	47.82	34.67	36.9
ENSMUSG00000098176	Ccdc166	-0.452274	0.762407	1.29	1.82	1.32	0.95
ENSMUSG00000035914	Cd276	-0.45127	0.1555	5.99	6.44	4.65	4.74
ENSMUSG00000028381	Ugcg	-0.450616	0.011605	13.81	15.46	10.48	11.25
ENSMUSG00000109644	0610005C13Rik	-0.450516	0.760003	2.03	1.76	1.34	1.49
ENSMUSG00000039182	AW209491	-0.45039	0.279577	7.75	6.86	5.88	5.17
ENSMUSG00000042195	Slc35f2	-0.450126	0.0099327	25.67	29.95	19.92	21.48
ENSMUSG00000028419	Chmp5	-0.449531	0.0143713	37.35	37.35	26.47	29.47
ENSMUSG00000034453	Polr3b	-0.449059	0.000699851	19.76	20.18	14.55	15.14
ENSMUSG00000042271	Nxt2	-0.448884	0.585221	2.7	3.59	2.39	2.29
ENSMUSG00000022354	Ndufb9	-0.448796	0.00329445	151.03	148.64	112.42	116.18
ENSMUSG00000114777	Gm46427	-0.448175	0.813666	2.04	1.76	1.46	1.39
ENSMUSG00000001588	Acap1	-0.448097	0.270021	7.3	6.21	5.03	5.06
ENSMUSG00000038225	Primpol	-0.447062	0.334655	4.97	4.92	3.64	2.49
ENSMUSG00000030693	Klk10	-0.44701	0.583294	5.87	5.92	4.49	4.35
ENSMUSG00000023330	Dtwd1	-0.446755	0.636571	4.92	6.89	4.62	3.97
ENSMUSG00000050234	Gja4	-0.446517	0.744655	2.84	2.27	2.02	1.81
ENSMUSG00000120133	ENSMUSG00000120133	-0.445817	0.780903	3	1.78	1.85	1.76
ENSMUSG00000025209	Twnk	-0.445378	0.0149414	17.82	17.75	13.42	15.29
ENSMUSG00000026036	Nif3l1	-0.445096	0.00746618	26.62	29.59	19.79	19.06
ENSMUSG00000104667	Gm4961	-0.444472	0.801043	1.3	1.37	1.01	0.98
ENSMUSG00000009145	Dqx1	-0.444387	0.712591	1.9	1.23	1.26	1.09
ENSMUSG00000023723	Mrps23	-0.444334	0.0121037	95.37	64.09	58	48.73
ENSMUSG00000050174	Nudt6	-0.444084	0.876903	1.82	1.51	1.03	1.41
ENSMUSG00000029082	Bst1	-0.444073	0.690447	1.72	1.78	1.35	1.26
ENSMUSG00000044501	Zfp758	-0.443963	0.548904	2.84	4.4	2.6	2.86
ENSMUSG00000020472	Zkscan17	-0.443864	0.000915033	26.98	24.9	19.49	19.17
ENSMUSG00000042505	Sdhaf3	-0.443713	0.689902	1.12	1.36	0.77	1.08
ENSMUSG00000067547	Gm7666	-0.443709	0.636571	11.52	9.89	7.15	9.28
ENSMUSG00000024909	Efemp2	-0.443075	0.516711	5.79	6.46	5	4.19
ENSMUSG00000022043	Trim35	-0.442801	0.00160271	25.16	26.5	19.98	18.58
ENSMUSG00000062007	Hsh2d	-0.442116	0.689902	2.9	2.96	2.11	2.29
ENSMUSG00000045232	Rln3	-0.441403	0.869732	5.35	3.49	3.02	3.9
ENSMUSG00000029629	Phf14	-0.441154	0.0119621	15.52	16.42	12.03	12.06
ENSMUSG00000019763	Rmnd1	-0.440993	0.144866	8.43	10.99	7.02	7.52
ENSMUSG00000037509	Arhgef4	-0.440848	0.724192	1.28	1.12	0.87	0.91
ENSMUSG00000037376	Trmt6	-0.44066	0.0107469	22.97	26.77	18.53	18.7
ENSMUSG00000034659	Tmem109	-0.440367	0.221382	9.64	8.6	6.85	6.8
ENSMUSG00000020346	Mgat1	-0.440156	0.079984	11.42	10.65	8.89	7.86
ENSMUSG00000054484	Tmem62	-0.440081	0.744655	1.31	1.45	1.11	1.15
ENSMUSG00000037681	Esyt3	-0.440025	0.399348	2.64	2.5	1.92	1.92
ENSMUSG00000044734	Serpinb1a	-0.439667	0.620446	3.57	3.84	2.58	2.99
ENSMUSG00000090470	Prr23a3	-0.43878	0.469981	5.61	7.06	4.83	4.68
ENSMUSG00000032860	P2ry2	-0.43873	0.534439	3.27	3.51	2.97	2.01
ENSMUSG00000035274	Tpbg	-0.43817	0.54787	2.38	2.36	1.8	1.76
ENSMUSG00000020085	Aifm2	-0.437982	0.355468	6.7	5.95	4.56	4.75
ENSMUSG00000049922	Slc35c1	-0.437901	0.388239	3.9	4.36	3.31	2.83
ENSMUSG00000006676	Usp19	-0.437542	2.55567e-05	63.78	58.39	45.5	45.55
ENSMUSG00000003458	Ncstn	-0.43721	0.00690117	22.3	21.53	16.63	16.26
ENSMUSG00000027006	Dnajc10	-0.436952	0.0189976	17.29	21.48	13.99	15.08
ENSMUSG00000033871	Ppargc1b	-0.436706	0.63685	1.81	1.6	1.31	1.26
ENSMUSG00000060419	Rps16-ps2	-0.436163	0.713268	26.63	23.74	23.16	17.16
ENSMUSG00000041712	Ubr7	-0.43592	0.000624478	47.31	52.15	35.9	38.81
ENSMUSG00000079104	Prps1l3	-0.435825	0.0396875	27.52	33.29	23.12	22.67
ENSMUSG00000029911	Ssbp1	-0.435759	0.0104307	71.14	73.97	52.11	57.65
ENSMUSG00000049532	Sall2	-0.434516	0.375364	2.77	3	2.41	1.9
ENSMUSG00000046556	Zfp319	-0.434367	0.513595	1.38	1.34	1.18	0.85
ENSMUSG00000034401	Spata6	-0.434261	0.341256	5.87	6.42	4.4	4.75
ENSMUSG00000007946	Phox2a	-0.434054	0.819079	2.03	1.68	1.41	1.4
ENSMUSG00000042148	Cox10	-0.433954	0.0605641	12.64	13.04	10.33	8.96
ENSMUSG00000045699	Gm21411	-0.433394	0.112701	34.37	48.12	29.11	33.31
ENSMUSG00000090553	Snrpe	-0.433332	0.00685457	388.05	362.35	288.19	302.56
ENSMUSG00000036391	Sec24a	-0.433134	0.023533	8.56	10.34	7.46	6.9
ENSMUSG00000049305	Ccdc71	-0.432385	0.0258893	17.39	16.35	13.62	11.77
ENSMUSG00000121319	ENSMUSG00000121319	-0.432012	0.769836	4.78	5.84	4.65	3.44
ENSMUSG00000054362	Lexm	-0.431989	0.835273	2.09	1.53	1.46	1.3
ENSMUSG00000022617	Chkb	-0.431891	0.368156	9.66	8.58	7.58	6.24
ENSMUSG00000024319	Vps52	-0.431485	0.00928416	18.09	17.62	13.26	13.64
ENSMUSG00000000301	Pemt	-0.431293	0.795011	3.8	4.6	3.39	2.98
ENSMUSG00000035596	Mboat7	-0.431201	0.0261596	16.32	15.56	11.93	12.11
ENSMUSG00000041837	Pdcd7	-0.430725	0.0879821	14.27	13.01	10.81	9.77
ENSMUSG00000024841	Eif1ad	-0.430299	0.00993465	25.54	24.79	19.74	18.23
ENSMUSG00000003604	Aven	-0.430277	0.46919	16.55	20.9	14.24	14.4
ENSMUSG00000038605	Samd10	-0.429851	0.683821	2.49	3.26	2.41	1.91
ENSMUSG00000025374	Nabp2	-0.429779	0.0856854	36.31	32.4	27.34	25.08
ENSMUSG00000121485	ENSMUSG00000121485	-0.429593	0.614273	3.61	3.95	3.22	2.79
ENSMUSG00000027082	Tfpi	-0.429388	0.0788668	19.95	22.47	14.98	17.54
ENSMUSG00000025207	Sema4g	-0.429313	0.167963	5.77	5.26	4.56	3.81
ENSMUSG00000042737	Dpm3	-0.4293	0.672778	47.67	34.81	37.78	29.04
ENSMUSG00000112980	D430020J02Rik	-0.429224	0.639504	2.36	2.53	2.17	1.5
ENSMUSG00000027751	Supt20	-0.428839	0.00329548	39.19	44.31	31.23	31.3
ENSMUSG00000038206	Fbxo8	-0.428784	0.45399	4.24	5.73	3.69	4.37
ENSMUSG00000079491	H2-T10	-0.428404	0.824959	1.75	1.73	1.22	1.43
ENSMUSG00000020841	Cpd	-0.427918	0.024429	5.87	6.24	4.72	4.4
ENSMUSG00000069014	Gm5641	-0.427858	0.278977	13.66	13.03	9.29	11.06
ENSMUSG00000027242	Wdr76	-0.427125	0.0480214	14.17	16.37	12.29	10.03
ENSMUSG00000004633	Chn2	-0.426888	0.787476	1.3	1.4	1.04	0.98
ENSMUSG00000032010	Usp2	-0.425496	0.594179	2.41	2.59	1.87	1.96
ENSMUSG00000023764	Sfi1	-0.425355	0.617063	2.51	2.11	1.71	1.47
ENSMUSG00000089857	Zfp882	-0.425307	0.479753	3.41	4.17	3.19	2.52
ENSMUSG00000027940	Tpm3	-0.425012	2.15527e-06	273.19	268.8	204.06	206.74
ENSMUSG00000001767	Crnkl1	-0.424396	0.00530716	22.06	23.47	16.99	17.45
ENSMUSG00000029122	Evc	-0.424315	0.20441	5.51	4.72	3.56	3.99
ENSMUSG00000021114	Atp6v1d	-0.422336	0.00479491	21.21	22.3	16.22	16.74
ENSMUSG00000026753	Ppp6c	-0.421982	0.0564228	17.33	18.75	10.19	13.67
ENSMUSG00000004535	Tax1bp1	-0.421554	0.00115161	42.51	47.47	33.71	34.52
ENSMUSG00000050213	Snip1	-0.421329	0.0700963	15.61	15.66	11.35	12.44
ENSMUSG00000040383	Aqr	-0.42114	0.00116299	39.65	45.21	33.55	30.74
ENSMUSG00000102869	Norad	-0.420891	0.000631368	26.33	26.04	20.38	19.29
ENSMUSG00000009549	Srp14	-0.420331	0.0366757	76.96	74.89	58	60.21
ENSMUSG00000072969	Armcx5	-0.420051	0.495997	3.59	4.31	3.03	2.99
ENSMUSG00000070426	Rnf121	-0.419845	0.151327	11.18	12.18	8.91	8.85
ENSMUSG00000021917	Spcs1	-0.419795	0.0739825	68.9	70.99	50.93	47.02
ENSMUSG00000054474	Thnsl2	-0.419756	0.855674	1.06	1.46	0.9	1.09
ENSMUSG00000112478	Gm47761	-0.41931	0.482917	4.58	3.46	2.79	3.35
ENSMUSG00000032997	Chpf	-0.419242	0.161533	10.22	8.69	7.59	6.78
ENSMUSG00000031146	Plp2	-0.419051	0.000462017	152.54	166.32	123.04	121.34
ENSMUSG00000024007	Ppil1	-0.418963	0.00278557	87.52	80.07	66.17	62.01
ENSMUSG00000091537	Tma7	-0.41826	0.00195842	147.5	141.43	109.93	112.41
ENSMUSG00000022865	Cxadr	-0.417811	0.154511	5.51	6.22	3.83	5.03
ENSMUSG00000024666	Tmem138	-0.417215	0.414245	8.78	9.25	6.51	7.11
ENSMUSG00000020877	Scrn2	-0.416766	0.216716	16.69	15.07	12.78	11.54
ENSMUSG00000026095	Asnsd1	-0.41648	0.0105419	38.52	43.11	30.63	32.81
ENSMUSG00000075590	Nrbp2	-0.416411	0.784727	1.55	1.25	1.37	0.94
ENSMUSG00000020459	Mtif2	-0.416116	0.0251704	22.01	23.05	16.53	18.62
ENSMUSG00000033624	Pdpr	-0.416002	0.0998818	7.83	8.84	7.04	5.6
ENSMUSG00000112808	Gm4739	-0.414536	0.886363	2.99	5.09	3.83	2.44
ENSMUSG00000034793	G6pc3	-0.414393	0.255563	16.09	15.02	13.06	11.02
ENSMUSG00000086930	Frs3os	-0.414318	0.876903	2.41	2.18	2.04	1.49
ENSMUSG00000021548	Ccnh	-0.414149	0.194397	14.05	16.94	10.26	12.6
ENSMUSG00000034435	Tmem30b	-0.41395	0.717351	1.81	1.65	1.25	1.4
ENSMUSG00000075707	Dio3	-0.413756	0.872036	1.71	1.1	1.19	0.92
ENSMUSG00000035829	Ppp1r26	-0.413664	0.477286	2.01	1.93	1.44	1.57
ENSMUSG00000032966	Fkbp1a	-0.412765	6.28989e-05	163.13	161.12	124.16	124.47
ENSMUSG00000050856	Atp5k	-0.412613	0.865252	343.62	204.34	253.97	225.96
ENSMUSG00000035266	Helq	-0.41261	0.130136	7.59	7.92	6.18	5.64
ENSMUSG00000112523	Gm48377	-0.412482	0.212991	67.19	49.47	50.25	40.53
ENSMUSG00000025225	Nfkb2	-0.412397	0.175104	8.47	7.7	6.21	6.06
ENSMUSG00000040483	Xaf1	-0.412373	0.632215	4.67	5.07	2.68	4.96
ENSMUSG00000029127	Zbtb49	-0.412282	0.579268	3.19	3.06	2.58	2.18
ENSMUSG00000027087	Itgav	-0.412183	0.0396875	6.86	7.36	5.07	5.78
ENSMUSG00000031505	Naxd	-0.412006	0.269716	18.42	16.04	13.85	12.78
ENSMUSG00000087687	Pet100	-0.411693	0.685142	35.08	15.67	19.6	23.98
ENSMUSG00000041779	Tram2	-0.41161	0.34932	2.44	2.44	1.67	2.05
ENSMUSG00000022561	Gpaa1	-0.411512	0.0532372	24.53	22.01	18.64	17.18
ENSMUSG00000026142	Rhbdd1	-0.410184	0.622161	2.01	2.05	1.54	1.56
ENSMUSG00000022346	Myc	-0.409521	0.195783	11.37	11.09	9.44	7.96
ENSMUSG00000038188	Scarf1	-0.409516	0.793485	1.45	1.23	0.86	1.29
ENSMUSG00000074221	Zfp568	-0.409509	0.000145754	42.33	46.75	34.73	33.96
ENSMUSG00000092607	Scnm1	-0.409297	0.158803	33.67	30.81	25.69	25.17
ENSMUSG00000014177	Tvp23b	-0.40917	0.0677357	22.47	23.64	18.22	17.16
ENSMUSG00000051185	Fam174a	-0.409159	0.801043	1.93	1.67	1.04	1.78
ENSMUSG00000113346	Eprn	-0.40905	0.300016	13.39	16.23	12.01	10.9
ENSMUSG00000040562	Gstm2	-0.408907	0.134573	32.34	31.85	25.5	24.14
ENSMUSG00000046179	E2f8	-0.408758	0.160123	7.12	8.07	5.92	5.6
ENSMUSG00000064289	Tank	-0.4086	0.702864	2.5	3.79	2.09	2.53
ENSMUSG00000019261	Map1s	-0.408565	0.0149414	29.82	24.53	20.95	20.67
ENSMUSG00000000339	Rtca	-0.408309	0.0493585	29.1	29.5	22.05	23.05
ENSMUSG00000049124	Gm8186	-0.408281	0.742136	214.68	179.45	218.04	256.86
ENSMUSG00000036160	Surf6	-0.407318	0.0126518	27.1	24.47	20.55	18.96
ENSMUSG00000030805	Stx4a	-0.407181	0.247752	23.24	17.72	16.42	15.46
ENSMUSG00000096847	Tmem151b	-0.406955	0.641917	1.83	1.35	1.1	1.36
ENSMUSG00000026781	Acbd5	-0.406893	0.142504	9.33	10.05	6.08	6.78
ENSMUSG00000034758	Tle6	-0.406889	0.636571	3.74	3.98	3.01	2.81
ENSMUSG00000046000	Naa11	-0.406764	0.758899	1.27	1.28	0.96	0.99
ENSMUSG00000011263	Exoc3l2	-0.406734	0.762443	1	1.5	0.85	1.29
ENSMUSG00000029147	Ppm1g	-0.40607	0.000171302	136.35	123.97	99.59	96.85
ENSMUSG00000107068	Gm42742	-0.405767	0.832125	21.14	30.97	25.43	14.72
ENSMUSG00000010760	Phlda2	-0.405339	0.544152	18.26	17.55	13.97	14.12
ENSMUSG00000047710	Champ1	-0.40531	0.023468	16.72	19.12	14.37	13.02
ENSMUSG00000028435	Aqp3	-0.405287	0.0656266	35.33	28.56	24.21	25.1
ENSMUSG00000030707	Coro1a	-0.404985	0.772906	2.67	2.94	2.47	1.85
ENSMUSG00000038957	Edc3	-0.40482	0.00828861	13.21	12.5	9.79	9.91
ENSMUSG00000054065	Pkp3	-0.404394	0.646697	3.8	2.49	2.75	2.05
ENSMUSG00000039209	Rpl39l	-0.4041	0.582398	15.22	14.71	12.33	11.64
ENSMUSG00000070953	Rabepk	-0.403417	0.224191	14.2	14.48	9.98	11.59
ENSMUSG00000078867	Gm14418	-0.403392	0.689902	7.2	5.74	4.38	5.54
ENSMUSG00000094076	Gm4767	-0.402776	0.690447	2.82	4.27	3.91	3.25
ENSMUSG00000038000	Acd	-0.402594	0.227587	8.11	7.08	6.21	5.48
ENSMUSG00000021318	Gli3	-0.402541	0.339865	2.3	2.53	1.49	1.7
ENSMUSG00000051427	Ccdc157	-0.402454	0.373893	3.38	2.86	2.29	2.51
ENSMUSG00000032583	Mon1a	-0.401881	0.689961	3.28	2.89	2.17	2.47
ENSMUSG00000039963	Ccdc40	-0.401295	0.601346	1.75	1.99	1.62	1.24
ENSMUSG00000040631	Dok4	-0.400892	0.814654	2.13	1.09	1.28	1.2
ENSMUSG00000070348	Ccnd1	-0.400889	0.00041053	45.87	45.66	35.02	35.37
ENSMUSG00000047821	Trim16	-0.400758	0.61142	1.97	3.11	1.68	1.79
ENSMUSG00000023960	Enpp5	-0.400616	0.733117	1.96	2.44	1.94	1.46
ENSMUSG00000066724	Gm10175	-0.400524	0.337136	44.47	39.35	32.18	34.43
ENSMUSG00000006649	Nphs1	-0.400325	0.160749	6.53	6.04	5.21	4.43
ENSMUSG00000024081	Cebpz	-0.400129	0.0026099	38.8	44.42	31.65	32.35
ENSMUSG00000034471	Caskin2	-0.400053	0.0531642	11.56	9.83	7.84	8.62
ENSMUSG00000025931	Paqr8	-0.400031	0.3236	3.3	3.32	2.35	2.75
ENSMUSG00000085337	Gm15964	-0.400009	0.546529	3.59	4.38	2.92	3.23
ENSMUSG00000040675	Mthfd1l	-0.399685	0.00308842	30.02	30.35	23.98	22.39
ENSMUSG00000114426	Gm10769	-0.399629	0.729296	3.41	5.52	3.16	3.75
ENSMUSG00000115018	Ndor1	-0.399443	0.343643	9.05	8.62	7.3	6.35
ENSMUSG00000038762	Abcf1	-0.399411	0.000145754	105.07	96.86	79.22	76.33
ENSMUSG00000028700	Pomgnt1	-0.399349	0.128902	15.02	14.55	12.8	9.97
ENSMUSG00000040410	Fbxl4	-0.399087	0.620446	3.24	3.46	2.84	2.31
ENSMUSG00000025269	Apex2	-0.39899	0.29649	9.14	8.28	7.02	6.07
ENSMUSG00000063018	2010204K13Rik	-0.398912	0.732097	9.59	9.77	7.22	8.22
ENSMUSG00000030056	Isy1	-0.398874	0.0540674	10.11	8.36	7.36	6.85
ENSMUSG00000095315	Gm10130	-0.398694	0.270021	10.35	10.65	7.38	8.86
ENSMUSG00000061207	Stk19	-0.39846	0.592026	12.34	9.12	8.02	8.79
ENSMUSG00000050144	Slc25a44	-0.398102	0.145707	8.27	7.84	6.27	6.21
ENSMUSG00000014504	Srp19	-0.39786	0.0369239	72.11	77.72	58.1	59.3
ENSMUSG00000038155	Gstp2	-0.397835	0.00289564	198.59	193.18	152.05	156.04
ENSMUSG00000086219	Srrm4os	-0.397448	0.793485	1.34	1.41	1.4	0.71
ENSMUSG00000042677	Zc3h12a	-0.397433	0.29828	7.14	6.72	5.37	5.33
ENSMUSG00000062352	Itgb1bp1	-0.397241	0.449079	10.31	14.48	10.63	7.06
ENSMUSG00000051034	Zfp11	-0.397016	0.784468	0.88	1.45	0.89	0.91
ENSMUSG00000005950	P2rx5	-0.396746	0.848296	1.15	1.2	0.8	1.03
ENSMUSG00000034595	Ppp1r18	-0.396172	0.158405	12.49	11.86	9	9.49
ENSMUSG00000018559	Ctdnep1	-0.395996	0.0493585	32.56	31.04	24.01	25.39
ENSMUSG00000027074	Slc43a3	-0.395405	0.596139	3.49	3.42	2.6	2.76
ENSMUSG00000025521	Tmem192	-0.39539	0.131949	32.68	33.11	26.27	25.14
ENSMUSG00000069266	H4c2	-0.395209	0.889482	10.58	10.11	6.43	11.72
ENSMUSG00000003411	Rab3b	-0.395103	0.789467	4.05	2.61	2.87	2.98
ENSMUSG00000018326	Ywhab	-0.394601	0.00169281	67.23	76.78	55.99	55.31
ENSMUSG00000018919	Tm4sf5	-0.393881	0.8505	3.49	3.7	2.09	3.58
ENSMUSG00000016346	Kcnq2	-0.393554	0.721681	1.48	1.17	0.94	1.08
ENSMUSG00000026755	Arpc5l	-0.393294	0.116338	27.73	27.59	21.48	21.64
ENSMUSG00000067367	Lyar	-0.393227	0.00493931	83.02	75.49	62.11	61.24
ENSMUSG00000066007	Zfp600	-0.393087	0.0274196	23.68	29.79	21.02	20.66
ENSMUSG00000046822	Slc39a3	-0.393045	0.592162	2.86	2.22	1.93	2.07
ENSMUSG00000044037	Als2cl	-0.392829	0.291731	4.6	3.73	3.17	3.29
ENSMUSG00000096795	Zfp433	-0.392608	0.65907	3.13	2.98	2.37	2.38
ENSMUSG00000022972	Cfap298	-0.392416	0.254209	26.38	19.69	18.36	17.68
ENSMUSG00000036751	Cox6b1	-0.392316	0.0112509	389.85	343.64	293.13	288.45
ENSMUSG00000041355	Ssr2	-0.392198	0.00025454	297.63	285.16	226.23	230.61
ENSMUSG00000017734	Dbndd2	-0.392132	0.898683	0.91	1.66	1.02	0.77
ENSMUSG00000121383	Zfp264	-0.392113	0.705783	1.99	2.54	1.72	1.78
ENSMUSG00000038539	Atf5	-0.391872	0.501636	9.06	7.03	6.66	6.46
ENSMUSG00000040820	Hlcs	-0.391854	0.453654	3	2.8	2.57	1.91
ENSMUSG00000026519	Tmem63a	-0.391711	0.517503	3.73	3.34	2.61	2.82
ENSMUSG00000084799	Ino80dos	-0.391565	0.829193	2.03	2.62	2.32	1.46
ENSMUSG00000028478	Clta	-0.391496	0.000350657	303.15	286.3	231.72	229.53
ENSMUSG00000027956	Tmem144	-0.391432	0.695224	2.15	2.92	2.04	1.96
ENSMUSG00000033222	Ttf2	-0.391267	0.00810208	22.26	24.61	18.76	17.47
ENSMUSG00000056687	Gm11696	-0.390912	0.860279	1.53	1.35	1.64	0.7
ENSMUSG00000002496	Tsc2	-0.390852	0.000741369	28.69	28.83	22.58	21.62
ENSMUSG00000022218	Tgm1	-0.390223	0.0622606	21.61	18.5	16.38	14.79
ENSMUSG00000054408	Spcs3	-0.389924	0.0355649	19.32	22.98	16.32	16.44
ENSMUSG00000021696	Elovl7	-0.389646	0.517503	2.83	3.71	2.38	2.69
ENSMUSG00000033416	Gucd1	-0.389437	0.372291	5.14	5.19	3.71	4.01
ENSMUSG00000004267	Eno2	-0.389365	0.814821	1.8	1.35	0.91	1.41
ENSMUSG00000032482	Cspg5	-0.389046	0.778676	1.83	1.67	1.24	1.62
ENSMUSG00000027162	Lin7c	-0.389019	0.00595986	28.93	32.83	23.62	24.24
ENSMUSG00000066000	Zfp979	-0.388839	0.056482	49.83	68.73	43.96	48
ENSMUSG00000024844	Banf1	-0.388571	0.0160174	300.82	267.09	223.27	232.4
ENSMUSG00000032557	Uba5	-0.388123	0.046438	25.17	22.31	18.1	18.86
ENSMUSG00000058997	Vwa8	-0.387541	0.158886	4.64	4.3	3.62	3.29
ENSMUSG00000038811	Gngt2	-0.386855	0.773146	10.95	11.49	9.34	8.47
ENSMUSG00000114369	Gm41077	-0.386809	0.872344	1.81	1.84	1.84	0.99
ENSMUSG00000045867	Cradd	-0.386368	0.613569	6.79	7.27	5.35	6.06
ENSMUSG00000064179	Tnnt1	-0.38595	0.827106	4.77	3.86	3.92	2.84
ENSMUSG00000060600	Eno3	-0.385838	0.366767	15.8	12.8	11.44	10.94
ENSMUSG00000026433	Rab29	-0.385707	0.695829	5.88	6.26	4.59	4.95
ENSMUSG00000028952	Zbtb48	-0.384928	0.46951	8.29	6.35	6.16	5.26
ENSMUSG00000116715	Gm40881	-0.384891	0.848596	3.55	7.22	4.96	3.4
ENSMUSG00000035476	Tab3	-0.38485	0.256399	5.27	7.38	4.44	5.37
ENSMUSG00000005069	Pex5	-0.384742	0.0105419	28.45	27.54	21.11	22.49
ENSMUSG00000112964	E430024I08Rik	-0.383743	0.350996	6.51	6.01	4.66	5.58
ENSMUSG00000035637	Grhpr	-0.383674	0.0306982	68.79	60.92	52.36	49.55
ENSMUSG00000045176	Borcs6	-0.38351	0.689902	5.59	3.6	3.72	3.52
ENSMUSG00000023018	Smarcd1	-0.382622	0.00156376	46.64	44.43	35.24	35.69
ENSMUSG00000034006	Slc66a2	-0.382586	0.636571	4.96	4.11	3.7	3.54
ENSMUSG00000027305	Ndufaf1	-0.382481	0.254209	18.52	20.45	14.82	16.75
ENSMUSG00000091387	Gcnt4	-0.382053	0.668411	1.45	1.36	1.02	1.18
ENSMUSG00000032114	Slc37a4	-0.382045	0.669444	3.3	3.65	2.79	2.57
ENSMUSG00000069814	Ccdc92b	-0.381864	0.312616	5.81	4.81	4.08	4.21
ENSMUSG00000024976	Shoc2	-0.381694	0.0636454	12.27	13.75	10.2	9.62
ENSMUSG00000028688	Toe1	-0.381224	0.113754	19.57	17.88	14.83	14.43
ENSMUSG00000030083	Abtb1	-0.381213	0.102384	22.56	21.69	16.87	17.8
ENSMUSG00000070462	Tlnrd1	-0.381074	0.07507	15.74	12.64	11.68	10.43
ENSMUSG00000049717	Lig4	-0.381007	0.374012	3.56	3.79	3.07	2.68
ENSMUSG00000018909	Arrb1	-0.380938	0.348747	2.47	2.54	1.98	2.06
ENSMUSG00000037007	Zfp113	-0.380927	0.594671	1.88	1.39	1.15	1.19
ENSMUSG00000027463	Slc52a3	-0.38073	0.548197	4.75	4.08	3.44	3.41
ENSMUSG00000030708	Dnajb13	-0.380723	0.843053	1.52	1.08	0.86	1.18
ENSMUSG00000061244	Exoc5	-0.380094	0.169083	7.44	8.79	6.41	6.45
ENSMUSG00000097048	1600020E01Rik	-0.380006	0.797999	9.65	8.06	7.63	12.48
ENSMUSG00000046311	Zfp62	-0.379733	0.1632	8.42	10.09	7.04	7.42
ENSMUSG00000039330	Tsga10ip	-0.37963	0.865252	4.87	3.29	2.77	1.6
ENSMUSG00000018752	Tnfsfm13	-0.379404	0.760366	2.9	3.23	2.09	2.03
ENSMUSG00000037752	Xkr8	-0.379309	0.320877	5	5	3.52	4.3
ENSMUSG00000097483	Gm26806	-0.379282	0.752082	3.88	4.41	2.66	3.85
ENSMUSG00000061024	Rrs1	-0.379037	0.00743371	63.16	57.74	45.71	49.08
ENSMUSG00000033088	Triobp	-0.379004	0.0208094	34.31	30.94	26.66	24.09
ENSMUSG00000009630	Ppp2cb	-0.378982	0.0100858	65.81	67.43	51.51	53.22
ENSMUSG00000029703	Lrwd1	-0.378826	0.013659	36.21	33.61	27.35	27.3
ENSMUSG00000021040	Slirp	-0.37882	0.0794632	23.02	21.99	16.31	17.44
ENSMUSG00000030469	Zfp719	-0.378467	0.449076	3.05	3.69	2.61	2.65
ENSMUSG00000018920	Cxcl16	-0.378335	0.701872	3.11	2.48	2.56	1.81
ENSMUSG00000049728	Zfp668	-0.378326	0.376288	5.87	5.17	4.53	4.15
ENSMUSG00000022546	Gpt	-0.378007	0.813666	4.81	3.23	3.38	3.06
ENSMUSG00000053769	Lysmd1	-0.377975	0.65907	3.36	3.33	2.42	2.82
ENSMUSG00000033039	Micall1	-0.377706	0.327705	3.15	3.02	2.17	2.66
ENSMUSG00000020691	Mettl2	-0.377684	0.0480809	30.51	31.63	25.14	23.58
ENSMUSG00000036908	Unc93b1	-0.377164	0.732705	3.02	2.46	2.04	2.22
ENSMUSG00000057132	Rpgrip1	-0.376978	0.741321	1.27	1.06	0.97	0.89
ENSMUSG00000006575	Rundc3a	-0.376629	0.407367	10.35	8.63	6.83	8.1
ENSMUSG00000024913	Lrp5	-0.376429	0.0152132	16.52	15.21	12.09	12.63
ENSMUSG00000030284	Creld1	-0.376235	0.185106	14.81	12.97	10.68	11.14
ENSMUSG00000031442	Mcf2l	-0.375841	0.425371	3.1	3.05	2.4	2.41
ENSMUSG00000041354	Rgl2	-0.375216	0.05115	20.26	17.48	14.82	14.77
ENSMUSG00000087598	Zfp111	-0.374932	0.393348	3.48	4.35	2.97	3.14
ENSMUSG00000045071	E130308A19Rik	-0.374757	0.279355	3.46	4.27	3.09	2.49
ENSMUSG00000029030	Tprgl	-0.374253	0.0520911	36.53	37.89	27.45	31.17
ENSMUSG00000042988	Notum	-0.373989	0.0396875	57.5	46.96	39.19	42.43
ENSMUSG00000086454	Platr14	-0.37392	0.0262712	74.05	82.67	56.46	66.41
ENSMUSG00000029469	Ift81	-0.373806	0.481483	4.48	4.9	3.76	3.59
ENSMUSG00000048027	Rgmb	-0.373659	0.615076	1.83	2.11	1.5	1.63
ENSMUSG00000033542	Arhgef5	-0.373587	0.620446	1.71	1.91	1.61	1.2
ENSMUSG00000021868	Ppif	-0.373135	0.0730103	33.48	37.2	28.42	27.22
ENSMUSG00000021645	Smn1	-0.372884	0.0399509	56.89	56.32	45.98	43.58
ENSMUSG00000029034	Ints11	-0.372086	0.017153	38.36	35.22	28.99	28.9
ENSMUSG00000037111	Setd7	-0.371917	0.298924	2.76	2.85	2.24	2.16
ENSMUSG00000038622	Med30	-0.371733	0.424057	22.82	21.65	19.85	15.44
ENSMUSG00000070509	Rgma	-0.37127	0.670614	2.06	2.21	1.61	1.74
ENSMUSG00000028309	Rnf20	-0.370932	0.0339057	16.5	18.13	13.2	14.15
ENSMUSG00000032086	Bace1	-0.370911	0.366974	2.97	3.62	2.63	2.49
ENSMUSG00000019823	Mical1	-0.370872	0.304292	6.38	6.21	4.6	5.35
ENSMUSG00000024258	Polr2d	-0.37085	0.0602578	64.68	62.97	52.41	50.95
ENSMUSG00000090157	Gm16534	-0.370607	0.859169	2.44	1.99	1.52	2.02
ENSMUSG00000049960	Mrps16	-0.370547	0.216149	14.29	11.54	10.19	10.16
ENSMUSG00000121374	ENSMUSG00000121374	-0.370511	0.904084	2.49	1.23	1.59	1.46
ENSMUSG00000046947	Adck2	-0.370479	0.80903	1.23	1.3	1.03	0.78
ENSMUSG00000028821	Syf2	-0.370298	0.178614	36.94	29.58	25.68	27.12
ENSMUSG00000030523	Trpm1	-0.37022	0.395568	6.66	6.95	4.81	5.62
ENSMUSG00000041429	Nthl1	-0.370103	0.479753	16.24	15.38	13.2	11.92
ENSMUSG00000024683	Mrpl16	-0.369748	0.233596	33.94	29.22	23.29	27.02
ENSMUSG00000052917	Senp7	-0.369703	0.77668	2.13	2.72	2.07	1.13
ENSMUSG00000024118	Tedc2	-0.369512	0.312358	10.97	10.83	7.92	9.29
ENSMUSG00000078713	Tomm5	-0.36941	0.0877891	129.79	128.63	95.97	114.39
ENSMUSG00000063903	Klk1	-0.369299	0.876833	2.93	2.98	2.52	2.18
ENSMUSG00000000776	Polr3d	-0.369199	0.200267	17.41	15.72	12.25	13.95
ENSMUSG00000028409	Smu1	-0.369058	0.0042332	65.52	71.98	55.1	53.19
ENSMUSG00000061759	Armt1	-0.368862	0.0670686	19.42	19.83	15.53	16.13
ENSMUSG00000054871	Tmem158	-0.36877	0.868501	1.69	1.45	1.31	1.17
ENSMUSG00000062937	Mtap	-0.368515	0.0118974	41.75	47.36	34.93	35.21
ENSMUSG00000003934	Efnb3	-0.36828	0.681719	2.86	2.19	1.89	2.1
ENSMUSG00000050332	Amer1	-0.368196	0.281761	2.92	3.67	2.68	2.49
ENSMUSG00000020523	Fam114a2	-0.36812	0.00941838	39.74	40.33	32.21	31.35
ENSMUSG00000064032	Gm10143	-0.368091	0.805374	1.08	1.74	1.17	1.06
ENSMUSG00000038250	Usp38	-0.367714	0.0448514	12.34	13.21	9.98	10.11
ENSMUSG00000050192	Eif5a2	-0.367401	0.580508	2.1	2.75	1.78	2.03
ENSMUSG00000028447	Dctn3	-0.367009	0.115046	50.74	51.96	39.33	42.71
ENSMUSG00000049739	Zfp646	-0.366794	0.0169916	12.96	13.59	10.6	10.26
ENSMUSG00000029265	Dr1	-0.366765	0.0911178	17.61	21.41	15.36	15.35
ENSMUSG00000110704	Gm45732	-0.366748	0.873332	5.86	8.22	4.61	6.88
ENSMUSG00000009681	Bcr	-0.366553	0.0587266	9.17	10.63	7.96	7.06
ENSMUSG00000121068	ENSMUSG00000121068	-0.366167	0.872344	2.26	2.51	2.38	1.36
ENSMUSG00000026843	Fubp3	-0.366043	0.00215889	47.56	48.2	38.06	37.67
ENSMUSG00000063785	Utp14a	-0.365937	0.0219396	30.82	30.88	24.36	24.34
ENSMUSG00000029551	Psmg3	-0.365757	0.611717	18.67	15.6	16.45	12.41
ENSMUSG00000028023	Pitx2	-0.365535	0.778745	2.51	3.2	2.11	2.39
ENSMUSG00000091779	Gm21293	-0.365532	0.889131	1.56	2.3	1.64	1.37
ENSMUSG00000094144	Gm21312	-0.365532	0.889131	1.56	2.3	1.64	1.37
ENSMUSG00000095022	Gm20765	-0.365532	0.889131	1.56	2.3	1.64	1.37
ENSMUSG00000097427	Gm6763	-0.365532	0.889131	1.56	2.3	1.64	1.37
ENSMUSG00000097550	Gm21304	-0.365532	0.889131	1.56	2.3	1.64	1.37
ENSMUSG00000034557	Zfyve9	-0.365363	0.225656	5.37	5.39	4.03	3.51
ENSMUSG00000047213	Ythdf3	-0.365056	0.0245351	22.88	27.06	20.56	19.91
ENSMUSG00000096883	Shisa8	-0.364407	0.465488	9.75	6.79	7.04	6.04
ENSMUSG00000029066	Mrpl20	-0.364071	0.184569	67.86	59.52	50.61	51.68
ENSMUSG00000029869	Ephb6	-0.364027	0.645485	2.49	2.14	1.83	1.83
ENSMUSG00000050555	Hyls1	-0.363995	0.394008	9.84	9.39	7.43	7.81
ENSMUSG00000092341	Malat1	-0.363601	0.0118665	316.94	246.68	229.63	219.61
ENSMUSG00000022752	Tomm70a	-0.363082	0.00398308	50.59	58.56	43.53	42.52
ENSMUSG00000073079	Srp54a	-0.362887	0.0253686	29.39	34.92	24.02	26.57
ENSMUSG00000022216	Psme1	-0.362883	0.0337049	80.14	77.58	60.25	65.8
ENSMUSG00000019984	Med23	-0.362435	0.0266553	15.81	17.26	12.95	13.06
ENSMUSG00000095134	Mid1-ps1	-0.362308	0.834787	3.31	3.79	2.25	3.4
ENSMUSG00000055235	Wdr86	-0.361837	0.616677	5.34	4.1	3.65	3.85
ENSMUSG00000021835	Bmp4	-0.361676	0.798227	2.1	2.53	1.74	2.13
ENSMUSG00000057534	Elobl	-0.360871	0.424057	33.7	28.12	26.19	25.51
ENSMUSG00000066571	Garre1	-0.359559	0.0311317	13.44	14.69	11.47	10.61
ENSMUSG00000094724	Rnaset2b	-0.359349	0.253596	23.78	29.55	23.15	22.45
ENSMUSG00000024036	Slc37a1	-0.358962	0.452724	4.85	5.11	4.19	3.89
ENSMUSG00000025135	Anapc11	-0.358746	0.0448514	110.5	95.02	80.22	78.82
ENSMUSG00000042289	Hsd3b7	-0.358581	0.723598	4.8	5.18	2.99	5.06
ENSMUSG00000031438	Rnf128	-0.358176	0.636571	3.62	4.39	3.6	2.72
ENSMUSG00000024835	Coro1b	-0.358072	0.02493	63.09	57.45	45.04	50.95
ENSMUSG00000045576	St7l	-0.357786	0.729525	2.69	1.85	1.81	2.16
ENSMUSG00000068114	Ccdc134	-0.357782	0.628135	4.96	4.95	4.04	3.83
ENSMUSG00000094622	Gm3055	-0.357609	0.639897	2.29	2.63	1.72	2.21
ENSMUSG00000038563	Efl1	-0.356941	0.121211	12.01	11.31	9.38	9.01
ENSMUSG00000026098	Pms1	-0.356737	0.356812	6.84	8.17	5.83	6.07
ENSMUSG00000022469	Rapgef3	-0.35642	0.664318	2.82	2.23	2.01	1.99
ENSMUSG00000002885	Adgre5	-0.356321	0.0635056	19.29	19.82	16.02	15.2
ENSMUSG00000097414	B130046B21Rik	-0.356297	0.876903	1.22	1.23	0.71	1.25
ENSMUSG00000007050	Lsm2	-0.355882	0.148199	66.29	63.34	48.67	55.55
ENSMUSG00000030630	Fah	-0.354975	0.407367	13.42	12.77	11.12	9.78
ENSMUSG00000020926	Adam11	-0.354294	0.701334	1.64	1.32	1.14	1.23
ENSMUSG00000063838	Cdc42ep5	-0.354198	0.682273	13.39	9.59	8.41	10.22
ENSMUSG00000024570	Rbfa	-0.354196	0.118021	45.53	38.86	33.33	34.37
ENSMUSG00000033585	Ndn	-0.354186	0.614273	3.05	2.7	2.13	2.45
ENSMUSG00000022339	Ebag9	-0.354178	0.722266	3.92	5.46	3.99	3.43
ENSMUSG00000028825	Rhd	-0.353805	0.814986	3.42	2.75	2.3	2.66
ENSMUSG00000061126	Cyp4f39	-0.353506	0.784233	1.93	1.98	1.6	1.52
ENSMUSG00000028833	Ncdn	-0.353372	0.1072	13.95	12.37	10.6	10.38
ENSMUSG00000024286	Ccny	-0.353171	0.1155	11.67	13.01	9.43	9.99
ENSMUSG00000027959	Sass6	-0.353071	0.579268	5.21	6.16	4.19	4.78
ENSMUSG00000008129	Brme1	-0.352446	0.876903	1.36	1.1	1.22	0.72
ENSMUSG00000023947	Nfkbie	-0.352138	0.814821	1.92	1.63	1.43	1.41
ENSMUSG00000095098	Ccdc85b	-0.35171	0.577442	2.76	2.38	2.08	2
ENSMUSG00000026806	Ddx31	-0.351379	0.368272	7.01	8.33	5.55	6.67
ENSMUSG00000036249	Rbm43	-0.351043	0.813656	2.07	2.94	1.69	2.34
ENSMUSG00000062054	Iah1	-0.35037	0.412299	18.53	18.62	15.22	14.84
ENSMUSG00000003410	Elavl3	-0.350194	0.773625	1.29	1.26	0.82	1.34
ENSMUSG00000040385	Ppp1ca	-0.350022	0.00219092	273.19	248.85	214.66	204.09
ENSMUSG00000002733	Plekha3	-0.349942	0.146008	15.7	16.77	13.08	12.81
ENSMUSG00000063646	Jakmip1	-0.349861	0.337136	10.93	9.52	8.24	8.41
ENSMUSG00000022141	Nipbl	-0.349585	0.0208184	14.62	16.73	13	11.91
ENSMUSG00000043067	Dpy19l1	-0.349274	0.0908516	13.72	15.66	12.2	11.74
ENSMUSG00000023277	Twf2	-0.349086	0.118367	30.89	29.95	24.91	23.86
ENSMUSG00000038335	Tsr1	-0.349001	0.00100428	87.92	90.62	70.31	72.08
ENSMUSG00000027998	Plrg1	-0.348969	0.029527	47.54	49.84	37.8	40.17
ENSMUSG00000028542	Slc6a9	-0.348823	0.689902	2.8	2.38	2.42	1.78
ENSMUSG00000101952	Gm10550	-0.348615	0.835907	7.05	5.81	7.06	3.35
ENSMUSG00000032890	Rims3	-0.348447	0.444203	3.8	3.19	2.81	2.25
ENSMUSG00000021118	Plek2	-0.348373	0.865252	1.96	2.37	2.02	1.43
ENSMUSG00000033032	Afap1l1	-0.348346	0.649931	2.82	3	2.02	2.62
ENSMUSG00000028059	Arhgef2	-0.348207	0.085882	13.58	12.24	9.96	10.49
ENSMUSG00000121500	ENSMUSG00000121500	-0.348009	0.416486	11.23	8.71	7.94	8.17
ENSMUSG00000026836	Acvr1	-0.347783	0.694649	2.78	3.15	2.47	2.4
ENSMUSG00000086714	0610009E02Rik	-0.347756	0.910329	0.89	2.49	1.33	1.4
ENSMUSG00000034109	Golim4	-0.347484	0.636571	2.19	2.06	1.7	1.68
ENSMUSG00000017724	Etv4	-0.347331	0.283092	12.09	11.51	8.99	9.91
ENSMUSG00000045532	C1ql1	-0.347327	0.845473	3.23	2.38	2.29	2.23
ENSMUSG00000025817	Nudt5	-0.347268	0.0600049	24.76	24.63	17.29	18.58
ENSMUSG00000037470	Uggt1	-0.34724	0.00378454	20.74	22.03	17.05	17.01
ENSMUSG00000009293	Ube2g2	-0.347126	0.21235	18.6	16.65	14.34	13.94
ENSMUSG00000100862	Gm10925	-0.346993	0.590557	3146.08	4570.5	2940.7	3345.29
ENSMUSG00000038260	Trpm4	-0.346779	0.423793	5.28	4.3	3.93	3.85
ENSMUSG00000116883	Gm49700	-0.346692	0.717568	4.85	5.75	4.23	4.25
ENSMUSG00000044949	Ubtd2	-0.34638	0.635481	13.27	12.16	9.58	11.06
ENSMUSG00000021770	Samd8	-0.346302	0.163555	7.39	8.05	6.01	5.73
ENSMUSG00000113836	Gm3325	-0.346268	0.548904	7	8.78	5.77	7.36
ENSMUSG00000040659	Efhd2	-0.345766	0.376288	10.12	8.86	7.75	7.46
ENSMUSG00000069920	B3gnt9	-0.345642	0.879656	1.54	0.84	0.85	1.11
ENSMUSG00000022024	Sugt1	-0.345626	0.00768576	20.45	21.79	16.48	17.21
ENSMUSG00000071267	Zfp942	-0.3454	0.564277	4.42	5.84	3.72	4.41
ENSMUSG00000024829	Mrpl21	-0.345323	0.0730103	91.53	94.94	75.55	76.28
ENSMUSG00000030276	Ttll3	-0.345224	0.863482	1.47	1.02	1.06	1.02
ENSMUSG00000017969	Ptgis	-0.345135	0.388666	10.67	9.82	8.15	8.3
ENSMUSG00000040618	Pck2	-0.34469	0.147468	19.99	15.95	15.21	13.37
ENSMUSG00000021403	Serpinb9b	-0.344516	0.83658	1.45	1.08	1.1	0.9
ENSMUSG00000021428	Riok1	-0.344433	0.193843	12.77	13.48	10.25	10.77
ENSMUSG00000036875	Dna2	-0.344309	0.0559824	17.39	19.55	14.79	14.72
ENSMUSG00000038268	Ovca2	-0.344262	0.147453	15.49	16.78	12.98	12.85
ENSMUSG00000026088	Mitd1	-0.344093	0.54787	12.83	15.61	10.61	12.32
ENSMUSG00000048012	Zfp473	-0.343968	0.257281	8.1	9.56	6.63	7.31
ENSMUSG00000086096	Gm12688	-0.343657	0.876903	2.91	2.62	2.78	1.67
ENSMUSG00000035186	Ubd	-0.343363	0.391048	28.97	28.59	21.94	24.91
ENSMUSG00000067919	Rex2	-0.343335	0.0466637	31.21	37.91	26.73	28.58
ENSMUSG00000046516	Cox17	-0.34324	0.292259	238.14	195.39	170.15	195.66
ENSMUSG00000112935	Gm40983	-0.343094	0.849072	5.09	2.97	3.4	3.15
ENSMUSG00000086837	Gm16618	-0.342824	0.888739	3.66	2.23	2.3	2.54
ENSMUSG00000054733	Msra	-0.342732	0.816394	4.37	3.6	3.7	2.47
ENSMUSG00000090264	Eif4ebp3	-0.342676	0.886363	5.78	3.72	2.88	5.08
ENSMUSG00000028932	Psmc2	-0.342384	0.00560787	97.03	96.54	76.26	79.5
ENSMUSG00000032182	Yipf2	-0.34229	0.515833	8.1	9.56	7.72	6.29
ENSMUSG00000026775	Yme1l1	-0.342106	0.00984965	40.72	45.98	34.39	35
ENSMUSG00000033808	Tmem87a	-0.341904	0.0860235	19.68	20.93	16.67	15.85
ENSMUSG00000021025	Nfkbia	-0.341585	0.186083	26.83	25.37	20.33	21.8
ENSMUSG00000041353	Tmem29	-0.341479	0.784727	4.52	6.21	3.79	4.93
ENSMUSG00000025607	Copg2	-0.341445	0.0406624	19.89	21.5	16.39	16.78
ENSMUSG00000025427	Rnf165	-0.341406	0.432328	2.46	2.5	2.09	1.88
ENSMUSG00000022386	Trmu	-0.340882	0.790929	3.68	4.02	3.46	2.73
ENSMUSG00000042388	Dlgap3	-0.340762	0.112433	28.44	21.63	20.67	19.35
ENSMUSG00000058793	Cds2	-0.34053	0.00581182	28.85	29.98	24	23.34
ENSMUSG00000023169	Slc38a1	-0.34024	0.00662264	27.68	29.18	23.18	22.45
ENSMUSG00000120444	ENSMUSG00000120444	-0.340208	0.889482	3.22	2.28	1.99	2.53
ENSMUSG00000028161	Ppp3ca	-0.339953	0.335834	5.29	5.41	3.9	4.36
ENSMUSG00000038517	Tbkbp1	-0.339899	0.452923	8.65	6.12	5.91	6.02
ENSMUSG00000038495	Otud7b	-0.339529	0.100841	6.43	6	4.9	5.07
ENSMUSG00000024885	Aldh3b1	-0.339137	0.906557	1.5	0.71	0.74	1.09
ENSMUSG00000041112	Elmo1	-0.338846	0.698969	1.4	1.48	1.14	1.17
ENSMUSG00000017679	Ttpal	-0.338524	0.62448	2.85	3.23	2.07	2.79
ENSMUSG00000022967	Ifnar1	-0.33845	0.163361	11.47	13.25	10.37	9.44
ENSMUSG00000029452	Tmem116	-0.338359	0.843885	2.78	3.3	2.07	2.56
ENSMUSG00000053838	Nudcd3	-0.337795	0.0140042	34.14	31.31	26.35	26.23
ENSMUSG00000026483	Niban1	-0.337331	0.0399994	12.81	12.85	10.32	9.69
ENSMUSG00000022623	Shank3	-0.337062	0.677089	1.88	1.92	1.65	1.07
ENSMUSG00000038059	Smim3	-0.337049	0.752629	3.51	3.47	3.01	2.61
ENSMUSG00000096065	Gm13155	-0.337012	0.881867	6.36	5.53	5.74	3.99
ENSMUSG00000096354	Gm8178	-0.337012	0.881867	6.36	5.53	5.74	3.99
ENSMUSG00000032495	Lrrc2	-0.336909	0.387521	6.74	6.78	6.04	4.8
ENSMUSG00000029521	Chek2	-0.336774	0.0956227	27.69	30.31	22.14	24.61
ENSMUSG00000037211	Spry1	-0.336641	0.545546	5.77	6.37	4.79	4.92
ENSMUSG00000022602	Arc	-0.336515	0.727552	2.57	2.35	1.88	2.09
ENSMUSG00000047030	Spata2	-0.336459	0.198849	10.43	10.29	9.06	7.56
ENSMUSG00000028889	Yrdc	-0.336407	0.172149	29.04	26.55	22	23.03
ENSMUSG00000032459	Mrps22	-0.336316	0.286379	26.99	29.05	22.04	23.45
ENSMUSG00000024095	Hnrnpll	-0.33599	0.0315272	29.91	31.7	24.68	24.79
ENSMUSG00000026436	Elk4	-0.335735	0.527977	3.71	4.03	2.75	2.88
ENSMUSG00000006304	Arpc2	-0.335724	0.0138133	106.95	109.58	84.16	91.53
ENSMUSG00000036873	2410004B18Rik	-0.33521	0.464604	14.18	12.63	11.41	10.31
ENSMUSG00000035151	Elmod2	-0.335175	0.669168	2.06	2.36	1.74	1.9
ENSMUSG00000031549	Ido2	-0.335127	0.593871	5.3	5.15	4.14	4.3
ENSMUSG00000056832	Ttc26	-0.335062	0.560984	3.71	5.14	3.85	3.25
ENSMUSG00000040018	Cox15	-0.334826	0.113623	11.43	11.9	9.97	8.76
ENSMUSG00000041359	Tcl1	-0.334641	0.332792	23.02	21.08	18.17	17.74
ENSMUSG00000070319	Eif3g	-0.334538	0.0603904	228.42	180.76	166.77	167.04
ENSMUSG00000051257	Trap1a	-0.334173	0.0200642	137.61	128.41	111.85	104.6
ENSMUSG00000031762	Mt2	-0.33411	0.0172263	1174.05	1092.91	937.83	978.16
ENSMUSG00000093617	4933438K21Rik	-0.333845	0.904797	1.19	1.26	1.22	0.75
ENSMUSG00000108815	Gm49388	-0.333647	0.944678	5.11	1.66	3.62	1.82
ENSMUSG00000009596	Taf7l	-0.333583	0.879645	1.8	2.02	1.54	1.14
ENSMUSG00000020088	Sar1a	-0.333361	0.0266919	43.37	46.89	37.66	35.14
ENSMUSG00000053137	Mapk11	-0.333197	0.855674	1.94	1.94	1.01	2.14
ENSMUSG00000009585	Apobec3	-0.333054	0.0261263	54.91	61.15	47.08	46.78
ENSMUSG00000023911	Flywch2	-0.332772	0.86838	5.64	7.67	5.92	4.96
ENSMUSG00000030335	Mrpl51	-0.332573	0.11915	17.78	15.41	13.56	13.22
ENSMUSG00000052698	Tln2	-0.332443	0.0542479	7.72	8.24	6.81	5.89
ENSMUSG00000028703	Lrrc41	-0.332255	0.281761	9.67	10.37	8.34	7.81
ENSMUSG00000026785	Pkn3	-0.331886	0.429888	8.83	7.07	6.96	5.87
ENSMUSG00000062761	Zfp512	-0.331831	0.127995	14.69	15.7	12.22	12.27
ENSMUSG00000006471	Ndor1	-0.331688	0.105646	16	16.84	12.8	12.01
ENSMUSG00000059486	Kbtbd2	-0.331463	0.145998	13.39	15.26	11.04	12.04
ENSMUSG00000092368	A930015D03Rik	-0.331174	0.906764	1.08	2.69	1.19	1.77
ENSMUSG00000118346	Tmem179b	-0.331149	0.764164	9.54	11.8	8.85	8.6
ENSMUSG00000105368	Gm43759	-0.330847	0.921798	1.18	1.44	1.23	0.88
ENSMUSG00000029149	Krtcap3	-0.330506	0.876903	3.58	4.74	3.97	2.79
ENSMUSG00000027342	Pcna	-0.330238	0.00206985	262.93	268.22	208.35	223.39
ENSMUSG00000001158	Snrnp27	-0.329828	0.334996	40.66	37.86	31.43	33.22
ENSMUSG00000025324	Atp10a	-0.329704	0.77513	1.01	1.43	1	0.96
ENSMUSG00000014905	Dnajb9	-0.329701	0.641769	4.65	5.04	3.49	4.36
ENSMUSG00000044279	Crb3	-0.329295	0.600587	15.73	14.14	12.12	12.02
ENSMUSG00000030222	Rerg	-0.329183	0.703909	3.99	4.26	3.06	3.44
ENSMUSG00000044600	Smim7	-0.328977	0.231235	25.34	24.16	24.65	23.25
ENSMUSG00000039748	Exo1	-0.328929	0.0594102	10.78	12.18	9.09	9.44
ENSMUSG00000037296	Lsm1	-0.328839	0.465488	6.93	7.28	5.75	5.75
ENSMUSG00000028212	Ccne2	-0.328757	0.579845	4.97	6.73	4.72	4.8
ENSMUSG00000034566	Atp5h	-0.328712	0.0361377	391.22	357.02	303.79	323.66
ENSMUSG00000073755	5730409E04Rik	-0.328581	0.788417	2.09	1.9	1.59	1.64
ENSMUSG00000038020	Rapgefl1	-0.328579	0.783776	1.16	1.17	0.94	0.94
ENSMUSG00000061518	Cox5b	-0.32831	0.201417	142.98	109.83	110.6	98.71
ENSMUSG00000020974	Pole2	-0.328085	0.341868	18.91	23.54	16.04	18.43
ENSMUSG00000028391	Wdr31	-0.328021	0.476284	10.5	10.77	8.66	7.92
ENSMUSG00000027313	Chac1	-0.327941	0.671186	7.03	6.39	5.84	5.07
ENSMUSG00000046792	Zfp787	-0.327806	0.671778	12.66	10.22	11.12	10.03
ENSMUSG00000035051	Dhx57	-0.327773	0.0991748	11.7	12.03	9.75	9.45
ENSMUSG00000112819	Gm46332	-0.327713	0.809495	22	17.27	14.42	19.29
ENSMUSG00000018377	Vezf1	-0.327562	0.357695	6.93	8.77	5.75	6.95
ENSMUSG00000029152	Ociad1	-0.327375	0.0645365	56.42	63.17	47.79	49.32
ENSMUSG00000035898	Uba6	-0.327057	0.11359	13.44	16.95	12.41	12.15
ENSMUSG00000021371	Mcur1	-0.326945	0.695829	1.94	2.09	1.61	1.65
ENSMUSG00000068966	Zbtb34	-0.326465	0.125276	7.86	8.35	6.82	6.29
ENSMUSG00000023952	Gtpbp2	-0.326353	0.35043	10.75	8.93	7.77	8.21
ENSMUSG00000022707	Gbe1	-0.326243	0.875191	1.19	1.1	1.23	0.68
ENSMUSG00000062901	Klhl24	-0.326017	0.238503	6.32	7.93	5.26	6.27
ENSMUSG00000050854	Tmem125	-0.325815	0.88354	1.51	1.76	1.73	0.9
ENSMUSG00000031796	Cfap20	-0.325648	0.216716	30.16	31.4	23.55	25.26
ENSMUSG00000074519	Zfp971	-0.325553	0.685646	7.69	8.75	6.54	7.47
ENSMUSG00000025373	Rnf41	-0.325424	0.263684	12.7	11.85	9.04	10.89
ENSMUSG00000007570	Fance	-0.324729	0.505965	15.64	10.97	9.96	11.55
ENSMUSG00000038005	Hpf1	-0.324718	0.231015	38.22	40.27	31.03	32.22
ENSMUSG00000053646	Plxnb1	-0.324709	0.192897	5.49	4.64	4.14	4.07
ENSMUSG00000037446	Tulp1	-0.324665	0.889131	2.09	2.06	1.95	1.51
ENSMUSG00000023235	Ccl25	-0.324551	0.695224	12.15	10.09	8.63	9.83
ENSMUSG00000021978	Extl3	-0.324049	0.101721	9.79	9.33	7.56	7.93
ENSMUSG00000020098	Pcbd1	-0.32403	0.888438	3.46	4.8	3.21	3.58
ENSMUSG00000031765	Mt1	-0.323991	0.0877891	1015.89	834.13	795.66	766.26
ENSMUSG00000054414	Slc30a7	-0.323861	0.406197	2.36	2.65	2.05	2
ENSMUSG00000116815	Gm49760	-0.323768	0.808672	2.82	4.12	2.81	2.8
ENSMUSG00000120610	ENSMUSG00000120610	-0.323531	0.915038	1.12	1.38	1.08	0.95
ENSMUSG00000113260	Gm53057	-0.323118	0.858295	1.97	2.63	1.73	1.91
ENSMUSG00000025421	Hdhd2	-0.322869	0.387019	16.99	21.11	14.8	15.52
ENSMUSG00000085687	Gm16153	-0.322503	0.824959	1.11	1.21	0.83	1.06
ENSMUSG00000038871	Bpgm	-0.322373	0.535121	8.28	8.44	7.52	6.06
ENSMUSG00000056260	Lrif1	-0.322364	0.690447	4.25	4.94	3.78	3.48
ENSMUSG00000036492	Rnf39	-0.322344	0.917193	1.43	0.86	0.98	0.91
ENSMUSG00000042826	Fgf11	-0.322118	0.825209	1.43	2	1.32	1.52
ENSMUSG00000055093	Rps27a-ps3	-0.321888	0.918903	7.75	5.64	6.19	5.73
ENSMUSG00000090266	Mettl23	-0.321728	0.436776	19.24	18.5	15.36	15.56
ENSMUSG00000032615	Nt5m	-0.321592	0.887339	2.25	1.97	1.72	1.74
ENSMUSG00000074698	Csnk2a1	-0.321439	0.00553927	76.47	83.3	64.21	65.56
ENSMUSG00000027189	Trim44	-0.321293	0.173492	9.12	10.76	7.82	8.31
ENSMUSG00000004665	Cnn2	-0.321256	0.0963696	27.1	25.64	21.09	21.89
ENSMUSG00000035572	Dcaf10	-0.321255	0.548734	2.05	2.18	1.79	1.64
ENSMUSG00000114025	Gm49331	-0.321098	0.876903	2.51	3.36	2.23	2.6
ENSMUSG00000031388	Naa10	-0.320977	0.120288	74.35	69.67	59.47	58.06
ENSMUSG00000079029	Eif1ad7	-0.320789	0.87084	1.59	2.76	1.87	1.64
ENSMUSG00000051469	Zfp24	-0.320386	0.183201	12.46	12.29	10.84	10.63
ENSMUSG00000109274	Gm45133	-0.320315	0.698857	4.39	3.59	2.71	3.84
ENSMUSG00000066042	Med18	-0.320278	0.594179	8.7	10.5	7.5	8.17
ENSMUSG00000032042	Srpr	-0.320277	0.0103698	57.94	60.06	48.57	47.45
ENSMUSG00000058298	Mcm9	-0.320227	0.460208	5.49	5.53	5.18	3.8
ENSMUSG00000056342	Usp34	-0.320139	0.0432998	30.08	37.54	27.13	27.76
ENSMUSG00000038305	Spats2l	-0.31995	0.868501	1.15	1.5	1.36	0.85
ENSMUSG00000037017	Zscan21	-0.31961	0.4134	11.61	11.65	10.44	8.42
ENSMUSG00000046806	Cyren	-0.319195	0.863448	1.4	1.44	1.23	1.31
ENSMUSG00000045211	Nudt18	-0.319083	0.832167	2.98	2.37	1.98	2.15
ENSMUSG00000013662	Atad1	-0.318846	0.214623	18.9	23.85	16.66	17.72
ENSMUSG00000031832	Taf1c	-0.318829	0.312379	10.58	9.4	7.79	8.5
ENSMUSG00000063412	Gm10131	-0.318619	0.927016	4.13	1.74	2.42	2.53
ENSMUSG00000024146	Cript	-0.318467	0.469151	20.61	26.45	20.06	18.47
ENSMUSG00000026946	Nmi	-0.318373	0.878857	2.74	2.96	2.34	2.43
ENSMUSG00000003585	Sec14l2	-0.31811	0.725134	4.65	3.14	3.17	3.2
ENSMUSG00000045752	Tssc4	-0.318034	0.553579	20	14.16	14.02	14.18
ENSMUSG00000079260	Tmppe	-0.317998	0.27557	11.75	12	9.28	10.11
ENSMUSG00000020397	Med7	-0.317929	0.352162	19.25	24.88	17.71	20.89
ENSMUSG00000004264	Phb2	-0.317644	0.0191953	347.19	296.99	270.42	259.03
ENSMUSG00000050248	Evc2	-0.317615	0.396846	6.54	5.81	5.29	4.77
ENSMUSG00000043004	Gng2	-0.317442	0.423793	23.78	20.72	20.23	14.49
ENSMUSG00000037475	Thoc2	-0.317329	0.130189	16.22	21.23	15.51	14.95
ENSMUSG00000028294	Cfap206	-0.317296	0.87652	1.73	1.71	1.24	1.44
ENSMUSG00000013155	Enkd1	-0.317088	0.509389	17.07	16.24	14.36	13.02
ENSMUSG00000027954	Efna1	-0.3166	0.882839	2.34	1.75	1.73	1.65
ENSMUSG00000059920	4930453N24Rik	-0.316482	0.295856	7	8.48	5.88	6.73
ENSMUSG00000071604	Entrep1	-0.316432	0.594785	6.29	5.5	4.57	5.08
ENSMUSG00000028318	Polr1e	-0.316428	0.315234	15.37	17.24	14.03	11.43
ENSMUSG00000005893	Nr2c2	-0.316255	0.124653	8.69	9.54	7.41	7.44
ENSMUSG00000032586	Traip	-0.316186	0.306691	11.59	12.52	10.07	9.6
ENSMUSG00000087120	Gm12279	-0.316176	0.921919	1.5	1.02	0.99	1.04
ENSMUSG00000085208	Brip1os	-0.31609	0.286379	7.19	7.25	6.01	5.79
ENSMUSG00000039187	Fanci	-0.316069	0.0273827	49.43	57.14	41.96	44.71
ENSMUSG00000043510	Hscb	-0.316069	0.579845	31.16	26.88	26.48	21.83
ENSMUSG00000026150	Mff	-0.315542	0.269752	31.38	40.62	28.8	30.51
ENSMUSG00000038416	Cdc16	-0.315421	0.0743408	34.69	34.81	27.4	29.48
ENSMUSG00000003808	Farsa	-0.31492	0.0606451	60.33	54.37	48.18	45.88
ENSMUSG00000044147	Arf6	-0.314549	0.165926	79.68	62.23	61.46	55.28
ENSMUSG00000031982	Arv1	-0.314329	0.861829	4.5	3.93	4.15	2.78
ENSMUSG00000006519	Cyba	-0.314327	0.610201	46.5	32.34	30.87	35.15
ENSMUSG00000033819	Ppp1r16a	-0.314312	0.231701	19.95	16.41	15.16	14.44
ENSMUSG00000037174	Elf2	-0.31429	0.158803	17.05	16.76	13.78	13.95
ENSMUSG00000079033	Mef2b	-0.314067	0.888438	2.63	1.86	1.86	1.85
ENSMUSG00000033837	Foxh1	-0.314057	0.368232	24.99	22.32	20.18	18.79
ENSMUSG00000074576	Mocs3	-0.313972	0.548243	14.41	11.1	11.88	9.02
ENSMUSG00000031174	Rpgr	-0.313589	0.645253	3.98	4.43	3.72	3.24
ENSMUSG00000118642	AY036118	-0.313253	0.903214	48.79	24.07	30.99	30.67
ENSMUSG00000032715	Trib3	-0.313219	0.335834	17.16	16.32	14.77	12.66
ENSMUSG00000030225	Dera	-0.313187	0.270162	21.93	23.27	19.19	17.89
ENSMUSG00000005682	Pan2	-0.312926	0.10766	15.91	17.96	14.11	13.59
ENSMUSG00000010660	Plcd1	-0.312775	0.69944	5.42	3.62	3.76	3.64
ENSMUSG00000078490	Cfap74	-0.312732	0.784727	2.49	3.05	2.14	2.4
ENSMUSG00000027433	Xrn2	-0.312724	0.0393262	44.28	50.95	38.79	39.07
ENSMUSG00000078872	Gm14401	-0.312073	0.783275	8.85	8.86	6.59	8.14
ENSMUSG00000034656	Cacna1a	-0.311979	0.0652018	11.18	10.79	8.72	8.67
ENSMUSG00000030208	Emp1	-0.311779	0.765135	2.52	3.04	2.2	2.37
ENSMUSG00000042729	Wdr74	-0.311651	0.0883702	75.34	73.7	63.99	58.58
ENSMUSG00000120635	ENSMUSG00000120635	-0.311438	0.927531	8.97	5.99	6.69	6.82
ENSMUSG00000052337	Immt	-0.311182	0.00880409	111.99	121.43	94.43	96.5
ENSMUSG00000032112	Trappc4	-0.310995	0.23982	36.1	37.16	30.07	30.47
ENSMUSG00000024782	Ak3	-0.310881	0.689902	3.69	4.49	3.03	3.69
ENSMUSG00000000792	Slc5a5	-0.310769	0.876833	1.33	0.94	0.91	0.96
ENSMUSG00000040177	2310057M21Rik	-0.310556	0.548197	2.49	2.41	2.11	1.89
ENSMUSG00000003346	Abhd17a	-0.310454	0.110792	56.35	51.71	45.9	43.18
ENSMUSG00000087193	Gm14820	-0.310406	0.669444	11.72	9.73	8.69	8.69
ENSMUSG00000025340	Rabgef1	-0.310191	0.331148	11.32	11.42	9.25	9.4
ENSMUSG00000120597	ENSMUSG00000120597	-0.310067	0.827398	2.72	2.6	2.58	1.78
ENSMUSG00000001228	Uhrf1	-0.310035	0.00129501	201.96	198.81	166.13	161.4
ENSMUSG00000117924	Tmem223	-0.309955	0.599166	34.89	27.99	25.18	27.73
ENSMUSG00000091784	Gm17022	-0.308968	0.917193	2.3	2.34	1.87	2
ENSMUSG00000044982	Sft2d3	-0.308472	0.864153	1.5	1.37	1.19	1.17
ENSMUSG00000086158	Pierce2	-0.308379	0.876364	5.42	7.46	5.51	5.09
ENSMUSG00000031157	Pqbp1	-0.308326	0.267314	38.28	39	32.21	32.03
ENSMUSG00000071041	Impdh2-ps	-0.30824	0.901921	2.17	1.5	1.96	1.08
ENSMUSG00000032846	Zswim6	-0.308239	0.665803	2.01	2.44	1.88	1.76
ENSMUSG00000078193	Gm2000	-0.308237	0.584497	118.27	97.56	84.96	106.08
ENSMUSG00000003228	Grk5	-0.308065	0.70716	1.38	1.77	1.1	1.5
ENSMUSG00000086537	Gnasas1	-0.308049	0.863482	2.14	1.64	1.67	1.44
ENSMUSG00000027820	Mme	-0.30803	0.137349	19.17	24.01	17.19	17.18
ENSMUSG00000032946	Rasgrp2	-0.307825	0.580508	23.4	22.21	19.81	25.24
ENSMUSG00000022911	Arl13b	-0.307673	0.546933	4.86	5.51	4.1	4.4
ENSMUSG00000055874	Foxi3	-0.307535	0.916335	1.63	1.8	1.72	1.06
ENSMUSG00000005078	Jkamp	-0.307484	0.292716	23.91	24.02	18.93	20.12
ENSMUSG00000044562	Rasip1	-0.307478	0.605787	5.69	4.86	3.81	4.89
ENSMUSG00000058186	Zfp980	-0.307258	0.0950013	56.39	71.45	50.05	54.86
ENSMUSG00000020527	Myo19	-0.307252	0.110694	17.88	16.81	14.75	14.7
ENSMUSG00000009905	Kdsr	-0.307219	0.365884	4.89	5.06	4	4.15
ENSMUSG00000034121	Mks1	-0.30718	0.296697	15.34	14.17	11.67	12.62
ENSMUSG00000092558	Med20	-0.307155	0.354637	16.76	15	13.53	12.61
ENSMUSG00000020811	Wscd1	-0.306896	0.854682	2.03	1.32	1.46	1.3
ENSMUSG00000117819	Gm50253	-0.306408	0.712356	1.85	2.18	1.49	1.83
ENSMUSG00000060279	Ap2a1	-0.306235	0.0131561	65.58	61	52.4	51.61
ENSMUSG00000024135	Srbd1	-0.306144	0.175083	19.42	16.83	15.32	15.5
ENSMUSG00000057554	Lgals8	-0.306141	0.753137	3.22	3.83	2.96	2.91
ENSMUSG00000062309	Rpp25	-0.305878	0.132276	78.16	65.2	57.84	60.96
ENSMUSG00000005882	Uqcc1	-0.305875	0.286999	15.96	13.89	11.9	12.82
ENSMUSG00000030329	Pianp	-0.305839	0.727552	4.56	4.38	3.9	3.4
ENSMUSG00000028044	Cks1b	-0.305483	0.0534662	149.42	150.95	123.83	127.74
ENSMUSG00000062232	Rapgef2	-0.305467	0.228334	6.05	6.16	5.18	4.83
ENSMUSG00000035725	Prkx	-0.305454	0.529329	4.33	4.91	3.88	3.83
ENSMUSG00000020519	Sap30l	-0.305423	0.500746	25.5	21.07	19.48	19.3
ENSMUSG00000059891	Tsks	-0.305371	0.912207	1.41	1.06	1.23	0.81
ENSMUSG00000118666	Gm46426	-0.30526	0.826166	3.32	4.35	3.1	3.24
ENSMUSG00000052293	Taf9	-0.305094	0.861624	4.14	3.5	4.52	2.14
ENSMUSG00000063052	Lrrc40	-0.305021	0.171441	14.58	17.06	13.25	12.72
ENSMUSG00000033768	Nrxn2	-0.304929	0.835202	1.55	1.08	1.15	1.07
ENSMUSG00000029032	Arhgef16	-0.304894	0.566624	6.13	5.74	4.88	4.9
ENSMUSG00000095661	Gm8935	-0.304891	0.566048	6.52	8.06	5.53	6.48
ENSMUSG00000023249	Parp3	-0.304828	0.787004	3.12	2.41	2.12	2.28
ENSMUSG00000066306	Numa1	-0.304671	0.0118716	34.86	32.03	28.06	26.81
ENSMUSG00000011096	Akt1s1	-0.304256	0.471787	35.33	24.05	27.2	22.14
ENSMUSG00000034932	Mrpl54	-0.303717	0.563563	52.2	46.18	42.4	41.52
ENSMUSG00000036499	Eea1	-0.303622	0.517501	2.52	2.97	2.39	2.11
ENSMUSG00000083246	Gm11839	-0.303535	0.883196	1.56	1.63	1.18	1.46
ENSMUSG00000029780	Nt5c3	-0.303361	0.654836	7.75	9.06	6.73	7.07
ENSMUSG00000025647	Shisa5	-0.303298	0.336734	19.14	18.49	16.05	15.5
ENSMUSG00000067377	Tspan6	-0.303255	0.871872	1.92	2.73	1.71	2.13
ENSMUSG00000073164	2410018L13Rik	-0.303039	0.683887	3.46	4.12	3.53	2.71
ENSMUSG00000045348	Nyap1	-0.302991	0.548109	7.48	5.98	5.72	5.86
ENSMUSG00000053654	Krt42	-0.302961	0.519619	16.34	13.89	12.9	12.16
ENSMUSG00000072571	Tmem253	-0.302868	0.906259	3.3	2.32	3.55	2.45
ENSMUSG00000003233	Dvl3	-0.302739	0.148402	20.5	17.5	15.59	15.91
ENSMUSG00000037343	Taf2	-0.302392	0.151359	19.16	24.08	17.79	17.76
ENSMUSG00000097577	6230400D17Rik	-0.302302	0.913102	1.1	2.12	1.27	1.53
ENSMUSG00000106831	Ube2n-ps1	-0.302245	0.651369	57.35	75.22	47.96	66.93
ENSMUSG00000042377	Fam83g	-0.30221	0.548234	4.01	3.62	3.3	2.97
ENSMUSG00000044783	Hjurp	-0.30203	0.0327557	37.11	40.46	30.46	32.46
ENSMUSG00000036845	Lin37	-0.302006	0.636166	22.85	17.56	18.36	15.44
ENSMUSG00000043252	Tmem64	-0.301334	0.587505	3.8	4.29	3.75	2.89
ENSMUSG00000051341	Zfp52	-0.301237	0.746935	2.61	2.92	2.66	2.29
ENSMUSG00000063882	Uqcrh	-0.300962	0.102882	243.17	254.54	202.6	224.77
ENSMUSG00000021709	Erbin	-0.300667	0.398367	4.75	5.63	4.24	4.35
ENSMUSG00000082585	Gm15387	-0.300661	0.856008	9.41	16.88	12.7	9.24
ENSMUSG00000026479	Lamc2	-0.300535	0.0992518	15.28	14.65	12.71	11.96
ENSMUSG00000007021	Syngr3	-0.300176	0.859169	2.1	2.74	1.96	2.03
ENSMUSG00000060227	Golm2	-0.299835	0.390034	10.34	14.37	10.32	10.08
ENSMUSG00000054792	Klhl18	-0.299818	0.698624	2.18	2.4	1.91	1.86
ENSMUSG00000005892	Trh	-0.299655	0.00761095	299.92	282.51	240.96	243.26
ENSMUSG00000002728	Naa20	-0.299216	0.1796	50.52	52.57	43.28	42.25
ENSMUSG00000086245	Gm16170	-0.298218	0.835273	1.35	1.37	1.12	1.13
ENSMUSG00000026254	Eif4e2	-0.298208	0.0318814	140.29	123.56	110.32	113.63
ENSMUSG00000007656	Arpp19	-0.297852	0.0988055	211	190.68	169.45	189.03
ENSMUSG00000008301	Phax	-0.297714	0.26502	25.4	29.72	21.9	23.53
ENSMUSG00000027233	Patl2	-0.297689	0.765428	3.44	3.21	2.84	2.66
ENSMUSG00000002768	Mea1	-0.297626	0.366974	62.77	51.29	47.03	49.14
ENSMUSG00000028403	Zdhhc21	-0.297522	0.343643	4.67	5.71	3.31	3.59
ENSMUSG00000054662	Ano9	-0.297447	0.341804	10.67	11.3	9.06	9.1
ENSMUSG00000045629	Sh3tc2	-0.297405	0.789399	1.65	1.37	1.19	1.31
ENSMUSG00000033031	Cip2a	-0.297344	0.0908516	28.04	31.78	23.63	25.8
ENSMUSG00000043068	Fam89a	-0.297284	0.915194	1.81	1.43	1.48	1.23
ENSMUSG00000004359	Spic	-0.297284	0.822818	3.66	3.39	2.61	3.26
ENSMUSG00000029470	P2rx4	-0.297067	0.685646	6.52	5.74	5.37	4.7
ENSMUSG00000027263	Tubgcp4	-0.296885	0.243908	12.91	12.16	10.73	10.08
ENSMUSG00000036792	Mbd5	-0.296719	0.597307	2.46	2.82	2.05	2.17
ENSMUSG00000107971	Gm44260	-0.29667	0.904571	1.06	1.32	0.87	1.1
ENSMUSG00000020792	Exoc7	-0.29659	0.239026	14.7	13.5	11.71	11.61
ENSMUSG00000051730	Mettl5	-0.296459	0.61599	22.67	19.17	17.17	18.04
ENSMUSG00000046671	Mtfr1l	-0.296452	0.233114	23.67	24.69	20.61	19.65
ENSMUSG00000021432	Slc35b3	-0.296432	0.86649	2.03	1.91	1.73	1.57
ENSMUSG00000113570	Gm5953	-0.29624	0.870717	1.93	1.26	1.29	1.36
ENSMUSG00000031548	Sfrp1	-0.296173	0.0118665	52.78	53.83	43.93	44.17
ENSMUSG00000003423	Pih1d1	-0.296048	0.271016	50.57	50.28	45.44	39.29
ENSMUSG00000097878	Gm8764	-0.29596	0.923799	1.35	1.97	1.64	1.09
ENSMUSG00000118663	Spata5l1	-0.295888	0.517501	11.11	9.15	8.54	8.27
ENSMUSG00000049106	Dcaf5	-0.295688	0.386766	4.92	4.96	4.03	4.12
ENSMUSG00000019842	Traf3ip2	-0.295382	0.620446	5.52	5.1	4.55	4.27
ENSMUSG00000049091	Sephs2	-0.29526	0.0401262	75.13	70.23	58.3	62.38
ENSMUSG00000039648	Kyat1	-0.295111	0.783275	3.93	4.65	3.91	3.28
ENSMUSG00000023800	Tiam2	-0.295108	0.753442	1.28	1.45	1.11	1.14
ENSMUSG00000054309	Cpsf3	-0.294968	0.0316454	57.82	58.99	48.49	48.41
ENSMUSG00000053012	Krcc1	-0.294811	0.594179	10.89	13.49	10.41	9.32
ENSMUSG00000038822	Hace1	-0.29448	0.575459	4.77	5.22	4.46	3.79
ENSMUSG00000026421	Csrp1	-0.293951	0.154391	39.39	36.23	31.54	31.39
ENSMUSG00000038538	Ubn2	-0.293799	0.0945048	6.32	6.89	5.84	5.32
ENSMUSG00000031557	Plekha2	-0.293762	0.190233	13.23	13.92	11.51	11.41
ENSMUSG00000068079	Tcf15	-0.2934	0.665803	19.4	15.79	15.37	14.27
ENSMUSG00000028651	Ppie	-0.293357	0.229223	46.74	46.45	40.01	37.93
ENSMUSG00000064210	Ano6	-0.293326	0.301799	9.25	9.82	8.35	7.15
ENSMUSG00000021037	Ahsa1	-0.293247	0.0133009	208.06	200.86	169.08	172.44
ENSMUSG00000021376	Tpmt	-0.292976	0.74042	5.64	5.95	5.53	4.06
ENSMUSG00000070697	Utp3	-0.292874	0.106749	68.49	61.05	55.47	52.54
ENSMUSG00000121479	ENSMUSG00000121479	-0.292822	0.915908	1.44	1.18	0.98	1.44
ENSMUSG00000005982	Naa60	-0.292715	0.395568	14.51	16.09	13.1	11.88
ENSMUSG00000020495	Smg8	-0.292653	0.131993	28.7	32.59	24.07	26.78
ENSMUSG00000006390	Elovl1	-0.292532	0.556158	13.87	14.77	11.3	12.36
ENSMUSG00000021235	Coq6	-0.292128	0.395568	21.61	20.12	16.74	18.08
ENSMUSG00000031400	G6pdx	-0.291742	0.0946763	34.63	37.8	30.19	29.95
ENSMUSG00000061186	Sfmbt2	-0.291261	0.528201	2.81	3.6	2.61	2.38
ENSMUSG00000028069	Gpatch4	-0.291213	0.367934	27.11	24.96	23.81	19.65
ENSMUSG00000078784	Rbis	-0.291117	0.248773	184.83	235.23	175.15	188.46
ENSMUSG00000074088	Snrnp40	-0.291071	0.0709077	74.38	72.65	63.46	59.22
ENSMUSG00000051319	Mtln	-0.290915	0.741321	22.8	15.84	16.57	16.38
ENSMUSG00000022681	Ntan1	-0.290709	0.579845	18.29	23.32	16.85	17.95
ENSMUSG00000028423	Nfx1	-0.290058	0.0262759	40.81	42.32	33.86	35.04
ENSMUSG00000031971	Ccsap	-0.289599	0.752629	3.96	3.76	3.39	3.04
ENSMUSG00000021710	Nln	-0.289097	0.343084	9.06	10.42	8.53	8.07
ENSMUSG00000081522	Gm13170	-0.288946	0.879928	7.75	8.24	7.36	6.43
ENSMUSG00000031483	Erlin2	-0.288904	0.225656	11.98	14.13	10.97	10.69
ENSMUSG00000026289	Atg16l1	-0.288859	0.149055	22.35	23.12	19.46	18.25
ENSMUSG00000073139	Tmem185a	-0.288791	0.648593	7.26	7.41	6.33	5.79
ENSMUSG00000075271	Ttc30a1	-0.288648	0.742136	2.54	2.41	2.11	2.01
ENSMUSG00000049823	Zbtb12	-0.288297	0.586009	11.12	9.87	8.71	8.85
ENSMUSG00000022003	Slc25a30	-0.288265	0.636571	4.44	4.88	4.34	3.39
ENSMUSG00000001065	Zfp276	-0.288086	0.598278	4.28	4.19	3.28	3.77
ENSMUSG00000068860	Gm128	-0.287928	0.878909	2.1	1.9	1.83	1.92
ENSMUSG00000043866	Taf10	-0.287783	0.191201	14.1	12.93	11.05	11.45
ENSMUSG00000042572	Ube2q1	-0.287486	0.0560697	45.74	48.08	39.86	42.39
ENSMUSG00000027007	Itprid2	-0.287401	0.426007	5.19	5.23	4.35	4.33
ENSMUSG00000110993	Gm47963	-0.287376	0.797114	3.24	3.6	2.9	2.8
ENSMUSG00000027822	Slc33a1	-0.287364	0.586009	5.72	5.8	4.74	4.71
ENSMUSG00000120994	ENSMUSG00000120994	-0.287363	0.91252	1.59	2.73	1.58	2.07
ENSMUSG00000002103	Acp2	-0.286902	0.501636	4.97	4.71	3.93	4.13
ENSMUSG00000006435	Neurl1a	-0.286618	0.584574	5.72	5.11	5.13	3.82
ENSMUSG00000074890	Lcmt2	-0.286221	0.752165	4.37	3.46	3.16	3.43
ENSMUSG00000030431	Tmem238	-0.286168	0.844593	8.1	4.2	5.27	5.13
ENSMUSG00000074748	Atxn7l3b	-0.286086	0.360636	9.71	10.89	8.4	8.76
ENSMUSG00000108402	9430064I24Rik	-0.286041	0.882839	1.32	1.29	0.9	1.29
ENSMUSG00000021484	Lman2	-0.285988	0.0670686	29.57	28.56	23.05	25.36
ENSMUSG00000024906	Mus81	-0.28598	0.646454	8.1	7.08	6.67	6.01
[truncated: 10,173 more rows]
